# Supplementary material for: Natural changes in light interact with circadian regulation at promoters to control gene expression in cyanobacteria
Source: eLife journal article supplement (doi:10.7554/elife.32032), 2017-12-14
Supplement: supp [file elife-32032-supp-v2.zip]

Archive with 28 entries (28 files):
- elife_poa_e32032_Figure_4_source_data_2.xlsx
- elife_poa_e32032_Figure_8_figure_supplement_4.png
- elife_poa_e32032_Figure_2_figure_supplement_2.png
- elife_poa_e32032_Figure_5_source_data_2.xlsx
- elife_poa_e32032_Figure_3_figure_supplement_1.png
- elife_poa_e32032_Figure_5_figure_supplement_1.png
- elife_poa_e32032_Figure_5_figure_supplement_3.png
- elife_poa_e32032_Figure_4_figure_supplement_4.png
- elife_poa_e32032_Figure_8_figure_supplement_1.png
- elife_poa_e32032_Figure_4_figure_supplement_2.png
- elife_poa_e32032_Figure_8_figure_supplement_2.png
- elife_poa_e32032_Figure_4_source_data_1.xlsx
- elife_poa_e32032_Figure_4_figure_supplement_3.png
- elife_poa_e32032_Transparent_Reporting_File.pdf
- elife_poa_e32032_Figure_8_figure_supplement_3.png
- elife_poa_e32032_Figure_2_figure_supplement_1.png
- elife_poa_e32032_Figure_2_source_data_1.xlsx
- elife_poa_e32032_Figure_5_figure_supplement_2.png
- elife_poa_e32032_Figure_4_figure_supplement_1.png
- elife_poa_e32032_Figure_3_source_data_1.xlsx
- elife_poa_e32032_Figure_3_figure_supplement_2.png
- elife_poa_e32032_Figure_2_figure_supplement_4.png
- elife_poa_e32032_Figure_2_figure_supplement_3.png
- elife_poa_e32032_Figure_5_source_data_1.xlsx
- elife_poa_e32032_Figure_6_figure_supplement_1.png
- elife_poa_e32032_Figure_7_figure_supplement_1.png
- elife_poa_e32032_Figure_7_source_data_1.xlsx
- elife_poa_e32032_Figure_3_source_data_2.xlsx
