# Supplementary material for: Natural changes in light interact with circadian regulation at promoters to control gene expression in cyanobacteria
Source: eLife journal article supplement (doi:10.7554/elife.32032), 2017-12-14
Supplement: supp [file elife-32032-supp-v2.zip › elife_poa_e32032_Figure_3_source_data_1.xlsx]

## Sheet: Replicate 2
													High Light pulse expression (median and length normalized)							Shade pulse expression (median and length normalized)							High Light pulse expression (Log2 normalized to average Low Light expression)							Shade pulse (Log2 normalized to average Low Light expression)
													Minutes in High Light pulse				Minutes since return to Low Light			Minutes in Shade pulse				Minutes since return to Clear Day			Minutes in High Light pulse				Minutes since return to Low Light			Minutes in Shade pulse				Minutes since return to Clear Day
													0	15	30	60	15	30	60	0	15	30	60	15	30	60	0	15	30	60	15	30	60	0	15	30	60	15	30	60
													Hours since dawn							Hours since dawn							Hours since dawn							Hours since dawn
Gene ID	JGI ID	Gene name	Gene description	Chromosome or Plasmid	Strand	Start	End	Reproducibly Circadian	Constant Light amplitude	Constant Light phase	High confidence circadian	High confidence class	8	8.25	8.5	9	9.25	9.5	10	8	8.25	8.5	9	9.25	9.5	10	8	8.25	8.5	9	9.25	9.5	10	8	8.25	8.5	9	9.25	9.5	10	RpaA target	Target of RpaA peak #	RpaB target	Target of RpaB peak #	RNAP target	Target of RNAP peak #
Synpcc7942_0001	637798406	dnaN	DNA polymerase III subunit beta	chromosome	+	65	1237	0	0.16312	58.6038	0		1.03126	1.17353	1.2352	1.33446	1.06612	1.08085	1.31319	1.01545	0.905959	0.825675	0.999815	1.061	1.09287	1.28616	-0.266864	-0.0804182	-0.00653168	0.104989	-0.218905	-0.199109	0.0818068	-0.289159	-0.453754	-0.587625	-0.311539	-0.225844	-0.183156	0.0518036	0	0	0	0	0	0
Synpcc7942_0002	637798407		hypothetical protein	chromosome	+	1262	2134	1	0.30113	18.8783	0		0.346821	0.452541	0.441246	0.419135	0.330757	0.353419	0.419505	0.326738	0.222696	0.277353	0.40945	0.403094	0.4626	0.468279	-0.0918327	0.292024	0.255559	0.18139	-0.160253	-0.0646467	0.182665	-0.177888	-0.73095	-0.414301	0.147662	0.125093	0.32374	0.341343	0	0	0	0	0	0
Synpcc7942_0003	637798408	purL	phosphoribosylformylglycinamidine synthase II	chromosome	+	2178	4511	0	0.0945008	120.887	0		0.721913	0.763909	0.921622	0.967446	0.871683	0.863529	0.785907	0.837464	0.804423	0.590742	0.627504	0.567805	0.774679	0.78778	-0.132742	-0.0511658	0.219609	0.289613	0.139236	0.125678	-0.0102083	0.0814592	0.0233864	-0.422039	-0.334943	-0.479172	-0.0309691	-0.00677484	0	0	0	0	0	0
Synpcc7942_0004	637798409	purF	amidophosphoribosyltransferase	chromosome	+	4596	6077	1	0.857311	178.109	1	Dawn	1.10893	0.935806	1.03709	0.947801	0.817475	0.761698	0.693638	1.06169	0.917759	0.736912	0.786015	0.649006	0.817837	0.784363	-0.402818	-0.647701	-0.499449	-0.629327	-0.842736	-0.944693	-1.07973	-0.465627	-0.675795	-0.992418	-0.899354	-1.17568	-0.842098	-0.902389	0	0	0	0	0	0
Synpcc7942_0005	637798410		hypothetical protein	chromosome	-	6111	7706	1	0.385393	5.0944	0		0.24263	0.141865	0.119163	0.148946	0.332564	0.335171	0.281377	0.245618	0.334379	0.389284	0.34685	0.320587	0.264596	0.264524	0.549785	-0.224453	-0.476033	-0.154181	1.00466	1.01593	0.763535	0.567446	1.01251	1.23185	1.06534	0.951745	0.674819	0.674426	0	0	0	0	0	0
Synpcc7942_0006	637798411		hypothetical protein	chromosome	-	7779	8192	0	0.0982861	256.442	0		0.248967	0.351311	0.257161	0.231133	0.188686	0.211112	0.201395	0.200576	0.129093	0.201043	0.181468	0.283776	0.255595	0.169575	-0.00237597	0.49442	0.0443398	-0.109609	-0.40234	-0.240318	-0.308301	-0.31418	-0.949924	-0.310823	-0.458616	0.186425	0.0355298	-0.556406	0	0	0	0	0	0
Synpcc7942_0007	637798412		hypothetical protein	chromosome	-	8189	8539	1	0.071184	229.586	0		0.789193	0.724408	0.647997	0.605246	0.584202	0.58801	0.607389	0.659036	0.580365	0.560484	0.633105	0.691318	0.619537	0.519758	0.422564	0.298987	0.138172	0.0397077	-0.0113472	-0.00197319	0.044805	0.162542	-0.0208544	-0.0711405	0.104629	0.231535	0.0733753	-0.179975	0	0	0	0	0	0
Synpcc7942_0008	637798413		hypothetical protein	chromosome	-	8536	8859	1	0.111083	281.161	0		0.921235	0.762489	0.663163	0.677973	0.787878	0.633761	0.667777	0.683999	0.774555	0.913382	0.866482	0.860759	0.605247	0.605817	0.237401	-0.0354509	-0.236805	-0.20494	0.0118041	-0.302229	-0.226803	-0.192173	-0.0127996	0.22505	0.149002	0.139441	-0.368644	-0.367285	0	0	0	0	1	2
Synpcc7942_0009	637798414	argG	argininosuccinate synthase	chromosome	+	8964	10166	1	0.394021	142.328	1	Dawn	0.661635	1.31318	1.94135	1.98204	0.917779	0.757158	0.767653	1.2595	0.837009	0.58774	0.523925	0.527996	1.0757	1.03376	-0.444883	0.544075	1.10807	1.138	0.0272277	-0.250325	-0.230466	0.483864	-0.105676	-0.615741	-0.781559	-0.770393	0.256283	0.198912	0	0	0	0	0	0
Synpcc7942_0010	637798415		hypothetical protein	chromosome	-	10252	10878	0	0.154758	263.948	0		0.589063	0.557706	0.621313	0.638291	0.734175	0.799421	0.661527	0.62607	0.836322	0.766979	0.792079	0.539357	0.695967	0.567458	-0.0186812	-0.0975975	0.0582176	0.0971115	0.29902	0.421852	0.148697	0.0692204	0.486956	0.362084	0.408541	-0.145863	0.221915	-0.0725892	0	0	0	0	0	0
Synpcc7942_0011	637798416		hypothetical protein	chromosome	-	10998	11474	0	0.40486	162.908	0		0.712779	0.648748	0.655385	0.672471	0.589264	0.591633	0.58634	0.681644	0.693365	0.609835	0.429396	0.798737	0.539329	0.653792	-0.252162	-0.387957	-0.373274	-0.336144	-0.526703	-0.520913	-0.533877	-0.316597	-0.292	-0.477196	-0.983308	-0.0878949	-0.65445	-0.376783	0	0	0	0	0	0
Synpcc7942_0012	637798417	rpsF, rps6	30S ribosomal protein S6	chromosome	-	11641	11964	0	0.153543	81.9966	0		5.84774	7.94804	13.6964	16.7339	8.10266	7.56938	6.16309	6.34904	4.68558	4.78488	3.14374	2.45011	4.72063	6.78339	0.0618874	0.504606	1.28973	1.57871	0.532402	0.434183	0.137661	0.180546	-0.257764	-0.227511	-0.833509	-1.19314	-0.247015	0.276013	1	1	0	0	1	3
Synpcc7942_0013	637798418		hypothetical protein	chromosome	+	12321	13028	0	0.584925	103.071	0		2.68923	11.0982	3.11273	1.7672	0.385182	0.612774	0.91007	1.23683	0.300851	0.427488	0.82321	1.76017	1.69683	1.28569	0.305311	2.35037	0.516301	-0.300416	-2.49827	-1.82846	-1.25783	-0.815229	-2.85476	-2.34793	-1.40255	-0.306164	-0.35904	-0.759344	1	1	0	0	1	3
Synpcc7942_0014	637798419		hypothetical protein	chromosome	-	13067	13411	1	0.11863	281.361	0		0.728228	0.446988	0.375922	0.413422	0.62873	0.634863	0.599597	0.567344	0.63536	0.952824	0.864169	0.800409	0.485396	0.643693	0.557102	-0.147054	-0.396855	-0.259672	0.345152	0.359158	0.276704	0.196935	0.360286	0.944921	0.804025	0.693448	-0.0281261	0.379085	0	0	0	0	0	0
Synpcc7942_0015	637798420		putative hydroxylase	chromosome	-	13577	14248	0	0.0768512	313.014	0		0.0777558	0.0491195	0.0496892	0.0474647	0.0923727	0.0799166	0.0926627	0.0537606	0.0553254	0.0938311	0.094145	0.0580032	0.0635638	0.0668042	0.0677376	-0.594917	-0.578281	-0.644357	0.316253	0.107281	0.320776	-0.464664	-0.423272	0.338853	0.34367	-0.355081	-0.223009	-0.151275	0	0	0	0	0	0
Synpcc7942_0016	637798421		hypothetical protein	chromosome	+	15020	15604	0	0.158549	239.08	0		0.14438	0.104033	0.0777596	0.117277	0.10611	0.113402	0.155155	0.12812	0.162855	0.206948	0.135183	0.146397	0.109525	0.106129	0.230873	-0.241957	-0.6619	-0.0690705	-0.21343	-0.117547	0.334714	0.0585053	0.404597	0.750276	0.135915	0.250891	-0.167729	-0.213179	0	0	0	0	0	0
Synpcc7942_0017	637798422	eda, hga	keto-hydroxyglutarate-aldolase/keto-deoxy- phosphogluconate aldolase	chromosome	-	15630	16193	1	0.0628838	50.2021	0		0.078685	0.164603	0.261699	0.273165	0.149634	0.0802833	0.109471	0.12811	0.0604263	0.0372663	0.0462712	0.0622965	0.148029	0.149878	-0.450097	0.614729	1.28365	1.34552	0.477176	-0.421086	0.0262908	0.25313	-0.831009	-1.52832	-1.21607	-0.787035	0.461618	0.479535	0	0	0	0	0	0
Synpcc7942_0018	637798423	glyS	glycyl-tRNA synthetase subunit beta	chromosome	-	16206	18392	0	0.113778	89.6065	0		0.459186	0.816907	1.10372	1.17281	0.700655	0.551788	0.572104	0.717222	0.468204	0.319069	0.254928	0.328338	0.637207	0.645943	-0.25151	0.579583	1.01372	1.10131	0.358116	0.0135247	0.0656898	0.391832	-0.223451	-0.776721	-1.1005	-0.735404	0.221174	0.240819	0	0	0	0	0	0
Synpcc7942_0019	637798424	sir	Sulfite reductase, ferredoxin dependent	chromosome	+	18615	20489	1	0.643525	345.518	1	Dusk	0.977278	1.36902	1.48715	1.48448	0.915075	0.986187	1.14547	0.874528	0.558093	0.643436	0.857035	0.700362	2.01821	1.48597	0.209352	0.695654	0.815059	0.812471	0.114473	0.222444	0.438456	0.0490881	-0.598912	-0.39362	0.0199377	-0.271316	1.25559	0.813916	0	0	0	0	0	0
Synpcc7942_0020	637798425		hypothetical protein	chromosome	+	20490	21092	1	0.117589	331.47	0		0.394094	0.594444	0.693392	0.682658	0.285695	0.370215	0.440193	0.345167	0.182399	0.193799	0.354097	0.267666	0.837972	0.556779	0.322344	0.915343	1.13747	1.11497	-0.141722	0.232168	0.481938	0.131095	-0.789096	-0.701634	0.167949	-0.235765	1.4107	0.820908	0	0	0	0	0	0
Synpcc7942_0021	637798426	cobK	cobalt-precorrin-6x reductase	chromosome	-	21134	21874	1	0.169048	257.592	0		0.142963	0.128765	0.0829407	0.0933994	0.0856537	0.123634	0.0883071	0.132438	0.111845	0.132746	0.113126	0.171142	0.142147	0.0986094	0.379366	0.228463	-0.406122	-0.234788	-0.359686	0.169799	-0.315672	0.269041	0.0252321	0.272398	0.0416621	0.63892	0.37111	-0.156477	0	0	0	0	0	0
Synpcc7942_0022	637798427		hypothetical protein	chromosome	-	21880	23049	1	0.278922	243.527	0		0.310783	0.249061	0.200603	0.21758	0.292101	0.292505	0.228222	0.374222	0.318428	0.354255	0.32579	0.39133	0.304928	0.206951	0.106816	-0.212592	-0.524747	-0.407546	0.0173756	0.0193701	-0.338656	0.374801	0.141877	0.295696	0.17485	0.439293	0.079378	-0.479804	0	0	0	0	0	0
Synpcc7942_0023	637798428	cax	calcium/proton exchanger	chromosome	-	23057	24121	1	0.450787	237.119	0		0.34344	0.242138	0.216292	0.257114	0.366743	0.349029	0.217524	0.474404	0.499643	0.534434	0.453699	0.451046	0.290782	0.230942	0.189803	-0.314423	-0.477278	-0.227844	0.284513	0.213091	-0.46908	0.655863	0.730642	0.827756	0.591481	0.583021	-0.0503175	-0.382725	0	0	0	0	0	0
Synpcc7942_0024	637798429		hypothetical protein	chromosome	-	24181	25371	0	0.200865	157.597	0		0.106375	0.164557	0.199504	0.208185	0.125321	0.121128	0.127164	0.148045	0.11446	0.0974142	0.116199	0.126299	0.119413	0.12952	-0.385664	0.243755	0.521591	0.58304	-0.149196	-0.198294	-0.128143	0.0912114	-0.279985	-0.512624	-0.258229	-0.137979	-0.218866	-0.101657	0	0	0	0	0	0
Synpcc7942_0025	637798430		hypothetical protein	chromosome	+	25416	27122	0	0.106565	208.392	0		0.134183	0.118741	0.113115	0.110703	0.162211	0.164708	0.168174	0.126985	0.191484	0.181246	0.232103	0.166272	0.1345	0.14996	-0.341752	-0.518125	-0.588154	-0.619249	-0.0680779	-0.0460406	-0.0159972	-0.421294	0.171272	0.0920033	0.448816	-0.0324006	-0.338337	-0.181368	0	0	0	0	0	0
Synpcc7942_0026	637798431		hypothetical protein	chromosome	-	27082	28059	1	0.107282	196.707	0		0.223956	0.205142	0.16131	0.197529	0.245325	0.245489	0.251983	0.277876	0.283528	0.338698	0.345275	0.429423	0.286374	0.265159	-0.152114	-0.278706	-0.625492	-0.333262	-0.0206301	-0.0196683	0.0179969	0.159113	0.188167	0.444671	0.47242	0.787073	0.202573	0.0915297	0	0	0	0	0	0
Synpcc7942_0027	637798432	bioF	8-amino-7-oxononanoate synthase	chromosome	+	28184	29350	0	0.0384731	174.008	0		0.0539748	0.0671763	0.0833503	0.113453	0.0729142	0.068577	0.0791334	0.0831688	0.0670352	0.0641171	0.0718309	0.0545695	0.0890101	0.0888043	-0.662215	-0.346549	-0.0353134	0.409523	-0.228302	-0.316776	-0.110216	-0.0384589	-0.349582	-0.413792	-0.249897	-0.646407	0.0594672	0.0561277	0	0	0	0	0	0
Synpcc7942_0028	637798433		hypothetical protein	chromosome	+	29347	30015	0	0.199579	205.175	0		0.0609857	0.0616747	0.0766764	0.0665687	0.0594253	0.0692568	0.0567935	0.0572257	0.0382068	0.0439842	0.0461015	0.0451335	0.0689277	0.0585373	0.330597	0.346805	0.660909	0.45697	0.293204	0.514082	0.227852	0.238789	-0.344046	-0.140889	-0.0730614	-0.103675	0.507209	0.271482	0	0	0	0	0	0
Synpcc7942_0029	637798434		hypothetical protein	chromosome	+	30012	30833	1	0.0850856	64.3617	0		0.0400558	0.0558421	0.0659369	0.0651603	0.0653344	0.0499607	0.0475064	0.051166	0.0395758	0.0347746	0.0375205	0.0367328	0.0602316	0.0517086	-0.292802	0.186539	0.426273	0.409179	0.41303	0.0259818	-0.0466905	0.0603729	-0.310193	-0.49678	-0.387132	-0.417745	0.295708	0.0755926	0	0	0	0	0	0
Synpcc7942_0030	637798435	bioD, cioD	dethiobiotin synthase	chromosome	+	30839	31471	0	0.0554292	162.928	0		0.151524	0.155623	0.178893	0.215818	0.235794	0.211269	0.172567	0.182293	0.203122	0.119535	0.163661	0.0954007	0.176368	0.158438	-0.18847	-0.149961	0.0510865	0.321799	0.449514	0.291068	-0.000852753	0.0782419	0.234333	-0.530585	-0.0773071	-0.855941	0.0305772	-0.124091	0	0	0	0	0	0
Synpcc7942_0031	637798436	bioA	aminotransferase	chromosome	+	31464	32738	1	0.104306	71.7158	0		0.0589466	0.0724079	0.0766696	0.0764662	0.0880721	0.0635941	0.0765692	0.0723177	0.0625719	0.0600048	0.0601642	0.0615728	0.0571054	0.0561857	-0.220316	0.0764241	0.158931	0.155098	0.358962	-0.110832	0.15704	0.0746255	-0.134208	-0.194646	-0.190819	-0.157431	-0.266096	-0.28952	0	0	0	0	0	0
Synpcc7942_0032	637798437		hypothetical protein	chromosome	-	32849	33202	1	0.509399	355.19	1	Dusk	0.242637	0.249136	0.231029	0.178505	0.360554	0.550306	0.591806	0.175167	0.323825	0.546235	0.795286	0.330323	0.382558	0.468135	0.358136	0.396268	0.287406	-0.0846994	0.929552	1.53957	1.64446	-0.11193	0.774552	1.52886	2.07081	0.803214	1.01501	1.30626	0	0	0	0	0	0
Synpcc7942_0033	637798438		hypothetical protein	chromosome	-	33174	33506	1	0.337957	345.901	1	Dusk	0.247191	0.154881	0.120619	0.148195	0.353969	0.407926	0.50869	0.123063	0.190731	0.532713	0.543836	0.24894	0.276953	0.301176	0.947173	0.272709	-0.0879965	0.209044	1.46517	1.66985	1.98833	-0.0590553	0.573088	2.0549	2.08472	0.957346	1.11119	1.23215	1	2	0	0	0	0
Synpcc7942_0034	637798439		N-acetylornithine aminotransferase	chromosome	+	33685	33798	0	0.0665101	298.295	0		0.00627877	0.00452417	0.004245	0.0158373	0.048945	0.00923701	0.032403	0.0189197	0.0271774	0.0294992	0.062433	0.0385255	0.0170314	0.0377036	-0.998334	-1.47116	-1.56305	0.336438	1.96427	-0.441391	1.36924	0.593	1.11552	1.23379	2.31542	1.61892	0.441313	1.58781	0	0	0	0	0	0
Synpcc7942_0035	637798440		hypothetical protein	chromosome	-	34357	35115	1	0.276814	328.037	0		0.0612987	0.0285398	0.0261411	0.017444	0.0661628	0.0624319	0.10568	0.0220231	0.0469428	0.0675683	0.122947	0.057141	0.0396503	0.0497085	0.160673	-0.942208	-1.06886	-1.65245	0.270836	0.187101	0.946452	-1.31616	-0.224281	0.301163	1.16478	0.0593441	-0.467852	-0.141692	0	0	0	0	0	0
Synpcc7942_0036	637798441		hypothetical protein	chromosome	+	35341	36126	0	0.0687804	171.389	0		0.173026	0.0971141	0.108361	0.139352	0.386889	0.266604	0.263182	0.13103	0.299574	0.275964	0.228391	0.240968	0.251344	0.180459	-0.133953	-0.967186	-0.809096	-0.446205	1.02698	0.489759	0.471121	-0.535046	0.657971	0.539539	0.266569	0.343902	0.404723	-0.0732671	0	0	0	0	0	0
Synpcc7942_0037	637798442		hypothetical protein	chromosome	-	36123	36326	0	0.172841	192.899	0		0.0877181	0.101128	0.0616773	0.0442513	0.0547032	0.144532	0.0724303	0.0977981	0.0683431	0.0824242	0.0775311	0.562444	0.140384	0.095984	0.289291	0.494533	-0.218844	-0.697865	-0.391958	1.00973	0.0130095	0.446223	-0.0707872	0.199484	0.111192	2.97005	0.967725	0.41921	0	0	0	0	0	0
Synpcc7942_0038	637798443	mutT	mutator MutT protein	chromosome	+	36479	36955	0	0.158563	268.465	0		0.250598	0.127587	0.115656	0.116074	0.217867	0.331138	0.189178	0.137911	0.246819	0.202691	0.265264	0.197958	0.185204	0.150182	0.404317	-0.569575	-0.711216	-0.706016	0.202388	0.806374	-0.00131521	-0.457316	0.382393	0.0982237	0.48637	0.064136	-0.0319462	-0.334346	0	0	0	0	0	0
Synpcc7942_0039	637798444	gnd	6-phosphogluconate dehydrogenase	chromosome	+	37130	38545	1	1.04305	344.364	1	Dusk	1.81675	0.874525	0.642847	0.653669	3.08392	4.02021	4.10761	0.926483	2.01078	2.81964	3.96693	2.2165	1.79693	2.27727	0.252482	-0.802304	-1.24633	-1.22224	1.01589	1.3984	1.42942	-0.719038	0.398881	0.886636	1.37915	0.539408	0.236655	0.578429	0	0	0	0	0	0
Synpcc7942_0040	637798445	folB	dihydroneopterin aldolase Dihydroneopterin aldolase	chromosome	+	38630	39007	1	0.332615	341.173	1	Dusk	1.4505	0.85004	0.652921	0.700528	2.31751	2.92784	3.15507	0.697551	1.17618	1.65032	2.5984	1.84303	1.65779	1.95959	0.30699	-0.463953	-0.844576	-0.743042	0.983016	1.32028	1.42812	-0.749186	0.00454862	0.493185	1.14807	0.652524	0.499709	0.740995	0	0	0	0	0	0
Synpcc7942_0041	637798446		probable transport protein	chromosome	+	39441	40745	0	0.188708	268.484	0		0.342806	0.233177	0.209888	0.189999	0.219662	0.257405	0.248285	0.162383	0.156692	0.244165	0.22967	0.223381	0.23061	0.14492	0.582924	0.0269521	-0.124849	-0.268479	-0.0591875	0.169567	0.117526	-0.495069	-0.546542	0.0933864	0.00509466	-0.034962	0.0109823	-0.659209	0	0	0	0	0	0
Synpcc7942_0042	637798448	rpmB, rpl28	50S ribosomal protein L28	chromosome	-	40855	41091	0	0.515695	137.675	0		4.03796	6.68305	9.27021	8.97139	4.97938	4.66527	4.52224	4.35237	3.97082	3.99789	3.0932	2.60132	3.80534	4.35463	-0.209275	0.517604	0.989699	0.942429	0.0930618	-0.000941857	-0.0458644	-0.101103	-0.233465	-0.223666	-0.593804	-0.843658	-0.294877	-0.100353	0	0	0	0	1	5
Synpcc7942_0043	637798449		hypothetical protein	chromosome	-	41131	41496	0	0.118188	19.8223	0		0.203391	0.212784	0.273698	0.281177	0.141018	0.17838	0.239342	0.198889	0.120627	0.149309	0.149089	0.223495	0.185671	0.163107	-0.104554	-0.039419	0.323775	0.362669	-0.632933	-0.293854	0.130266	-0.136843	-0.858251	-0.550505	-0.55264	0.0314338	-0.236064	-0.422986	0	0	0	0	0	0
Synpcc7942_0044	637798450		hypothetical protein	chromosome	+	41495	43477	1	0.243207	160.014	0		0.0635286	0.0535782	0.0463674	0.0455232	0.0334136	0.045137	0.0516263	0.0788559	0.0726512	0.111503	0.0845453	0.110462	0.0638872	0.0459998	-0.392756	-0.638517	-0.847051	-0.873559	-1.31973	-0.885853	-0.692055	-0.080944	-0.199176	0.418853	0.0195624	0.405316	-0.384635	-0.858536	0	0	0	0	0	0
Synpcc7942_0045	637798451		TPR repeat	chromosome	+	43572	44927	0	0.19557	353.677	0		0.0897364	0.0745486	0.0645953	0.0750052	0.0684093	0.0908578	0.103128	0.0540802	0.0594054	0.0886607	0.113141	0.0878543	0.0898484	0.0739613	0.155183	-0.112328	-0.319081	-0.103519	-0.236319	0.1731	0.35586	-0.575411	-0.439915	0.137784	0.489534	0.124602	0.156982	-0.12374	0	0	0	0	0	0
Synpcc7942_0046	637798452		Methylase involved in ubiquinone/menaquinone biosynthesis-like	chromosome	+	45164	46507	0	0.20421	192.691	0		0.969818	0.447064	0.412996	0.457632	0.78932	0.783496	0.772713	0.465391	0.714043	0.890144	1.00617	1.01996	0.506704	0.599816	0.272364	-0.844867	-0.95922	-0.811162	-0.0247398	-0.0354234	-0.0554167	-0.786907	-0.169338	0.14869	0.325459	0.345088	-0.664205	-0.420829	0	0	0	0	1	6
Synpcc7942_0047	637798453		TPR repeat	chromosome	+	46515	48881	0	0.115738	227.203	0		0.211377	0.138363	0.122056	0.126872	0.154108	0.167718	0.185043	0.103195	0.10275	0.159479	0.207143	0.221729	0.13637	0.150719	0.130986	-0.48038	-0.661294	-0.605457	-0.324889	-0.202799	-0.0609754	-0.903461	-0.909689	-0.27547	0.101791	0.199963	-0.501305	-0.356975	0	0	0	0	0	0
Synpcc7942_0048	637798454		pilin polypeptide PilA-like	chromosome	-	48927	49361	0	0.21525	148.536	0		5.1783	3.23562	3.40976	3.37294	4.91593	5.47328	4.89857	2.40476	2.79552	3.83835	4.44312	2.60359	2.37007	2.82375	0.641107	-0.0373288	0.0382975	0.0226369	0.566094	0.721033	0.56099	-0.46548	-0.248253	0.209116	0.420203	-0.350868	-0.48644	-0.233757	0	0	0	0	1	8
Synpcc7942_0049	637798455	pilA	pilin polypeptide PilA-like	chromosome	-	49550	49984	0	0.314217	172.443	0		5.75586	2.11519	2.38739	2.45984	3.75349	5.24815	4.44729	1.93	2.91482	3.17543	4.70491	2.89134	2.67358	2.42632	0.235216	-1.20903	-1.03438	-0.99125	-0.381583	0.101993	-0.136888	-1.34121	-0.746407	-0.622861	-0.0556476	-0.758078	-0.87104	-1.01105	0	0	0	0	1	10
Synpcc7942_0050	637798456		hypothetical protein	chromosome	+	50070	52616	0	0.0782091	55.1996	0		0.627537	0.749637	0.671649	0.690897	0.670903	0.702012	0.696979	0.50682	0.620982	0.723546	0.63992	0.509328	0.660535	0.66321	0.220064	0.476555	0.318072	0.358833	0.316469	0.38186	0.371478	-0.088162	0.204916	0.425449	0.248254	-0.0810411	0.293999	0.29983	0	0	0	0	1	9
Synpcc7942_0051	637798457		TPR repeat	chromosome	-	52606	54507	0	0.125652	141.551	0		0.488853	0.432778	0.391825	0.417981	0.81481	0.778968	0.665043	0.436302	0.477683	0.781938	0.556732	0.490395	0.583649	0.639283	0.693253	0.517482	0.374063	0.467292	1.43032	1.36542	1.1373	0.529179	0.659908	1.37091	0.880837	0.697796	0.948955	1.08031	0	0	0	0	0	0
Synpcc7942_0052	637798458		hypothetical protein	chromosome	-	54512	55030	0	0.152783	147.811	0		0.510286	0.386568	0.324485	0.388456	1.08719	0.91708	0.716827	0.558951	0.983491	1.02701	0.745106	0.466481	0.576116	0.6791	0.368192	-0.0323932	-0.284964	-0.0253624	1.45941	1.21393	0.85851	0.499607	1.3148	1.37727	0.914331	0.238704	0.543244	0.780511	1	4	1	5	0	0
Synpcc7942_0053	637798459		hypothetical protein	chromosome	-	55204	56352	0	0.257176	206.385	0		0.44853	0.148128	0.128037	0.148228	0.63555	0.571874	0.393598	0.259516	0.379525	0.727313	0.450126	0.226953	0.27586	0.271833	1.0515	-0.546863	-0.757146	-0.545887	1.5543	1.40199	0.863017	0.262116	0.81049	1.74887	1.05662	0.068688	0.350231	0.329015	0	0	0	0	0	0
Synpcc7942_0054	637798460		hypothetical protein	chromosome	-	56423	57190	0	0.0820753	140.955	0		0.457614	0.365998	0.300566	0.293856	0.607558	0.681446	0.617719	0.324369	0.528473	0.655723	0.731094	0.55971	0.616225	0.580184	0.274889	-0.0474085	-0.331564	-0.364134	0.683779	0.849355	0.707706	-0.221607	0.482585	0.793843	0.950814	0.565437	0.704214	0.617266	0	0	0	0	0	0
Synpcc7942_0055	637798461		hypothetical protein	chromosome	-	57223	57906	0	0.172466	146.369	0		1.09251	0.685411	0.563169	0.598298	1.48772	1.55182	1.46431	0.653518	1.10295	2.24931	2.15394	1.10921	1.13614	1.10388	0.657882	-0.0147184	-0.298119	-0.210824	1.10335	1.1642	1.08046	-0.0834619	0.671606	1.69972	1.63722	0.679776	0.71438	0.67282	1	5	0	0	0	0
Synpcc7942_0056	637798462	rfbE	perosamine synthetase	chromosome	-	57941	59068	0	0.145842	162.258	0		0.223998	0.216727	0.146723	0.132314	0.222595	0.211911	0.221749	0.175435	0.249259	0.350303	0.30497	0.253566	0.285299	0.242176	0.533449	0.485837	-0.0769421	-0.22607	0.524384	0.453416	0.518887	0.180895	0.687603	1.17856	0.978625	0.712322	0.882436	0.646018	0	0	0	0	0	0
Synpcc7942_0057	637798463		putative C-3 methyl transferase	chromosome	-	59072	60304	0	0.128199	220.749	0		0.165448	0.16648	0.11539	0.0995707	0.11483	0.156287	0.157499	0.121137	0.14574	0.231831	0.20011	0.213273	0.183844	0.170425	0.408374	0.41735	-0.11149	-0.324209	-0.118501	0.326199	0.337338	-0.0413673	0.22539	0.895068	0.682788	0.774697	0.560482	0.451139	0	0	0	0	0	0
Synpcc7942_0058	637798464	rfbC	dTDP-4-dehydrorhamnose 3,5-epimerase	chromosome	-	60301	60846	0	0.0846324	298.244	0		0.264812	0.222927	0.162196	0.134472	0.176283	0.219861	0.217461	0.191588	0.276627	0.326436	0.428722	0.332811	0.26759	0.262406	0.310481	0.0620819	-0.39675	-0.667184	-0.2766	0.0421024	0.0262701	-0.156484	0.373452	0.612311	1.00555	0.640215	0.325535	0.297311	0	0	0	0	0	0
Synpcc7942_0059	637798465		hypothetical protein	chromosome	-	60867	61112	0	0.0998522	201.5	0		0.517922	0.467534	0.340324	0.332712	0.493329	0.475143	0.519126	0.444959	0.777704	0.868067	0.890474	0.694046	0.530779	0.576589	-0.0792018	-0.226866	-0.685026	-0.717663	-0.149385	-0.203576	-0.0758525	-0.298265	0.507285	0.66587	0.702636	0.343094	-0.0438265	0.0756065	0	0	0	0	0	0
Synpcc7942_0060	637798466		hypothetical protein	chromosome	-	61091	61369	1	0.10665	351.622	0		0.230897	0.17007	0.124885	0.150994	0.267487	0.25665	0.272365	0.199064	0.255409	0.319416	0.473357	0.334509	0.327077	0.297845	0.0409103	-0.400211	-0.845737	-0.57185	0.253131	0.193463	0.279202	-0.173108	0.186472	0.509099	1.07659	0.575707	0.543292	0.408223	0	0	0	0	0	0
Synpcc7942_0061	637798467	rfbG	CDP-glucose 4,6-dehydratase	chromosome	-	61366	62472	1	0.122327	326.019	0		0.164235	0.128589	0.136829	0.117971	0.242569	0.273956	0.211178	0.170969	0.260984	0.277204	0.394337	0.200353	0.210908	0.219591	0.0735877	-0.279403	-0.189797	-0.403736	0.636224	0.811771	0.436285	0.131564	0.741788	0.828777	1.33726	0.360373	0.434443	0.492648	0	0	0	0	0	0
Synpcc7942_0062	637798468	rfbF	glucose-1-phosphate cytidylyltransferase	chromosome	-	62469	63242	0	0.0917831	140.637	0		0.382859	0.161923	0.203826	0.216157	0.764149	0.72378	0.441119	0.383857	0.772554	0.981934	0.96349	0.306412	0.353072	0.356641	0.396514	-0.844991	-0.512964	-0.428222	1.39355	1.31525	0.600869	0.40027	1.40934	1.75533	1.72797	0.0751731	0.279665	0.294175	0	0	0	0	0	0
Synpcc7942_0063	637798469		dual specificity protein phosphatase	chromosome	-	64266	64706	0	0.103024	46.8674	0		0.0113616	0.0245598	0.0427965	0.0259286	0.014234	0.0382048	0.0167526	0.0171178	0.0158073	0.0114385	0.0161391	0.0199179	0.0550336	0.0238248	-0.549653	0.562479	1.36368	0.640729	-0.224476	1.19994	0.0105667	0.0416813	-0.0732301	-0.539924	-0.0432536	0.260251	1.72649	0.518646	0	0	0	0	0	0
Synpcc7942_0064	637798470		hypothetical protein	chromosome	-	64703	64870	0	0.0456526	279.645	0		0.0511271	0.0767492	0.146907	0.154037	0.0788801	0.0752156	0.0910922	0.105916	0.0645463	0.0100087	0.0423652	0.0686235	0.182024	0.136451	-0.128098	0.457965	1.39465	1.46301	0.497474	0.428845	0.70514	0.922668	0.208147	-2.48094	-0.399306	0.296516	1.70387	1.28812	0	0	0	0	0	0
Synpcc7942_0065	637798471	infC	translation initiation factor IF-3	chromosome	-	64987	65541	0	0.153557	81.9699	0		4.30371	1.91155	2.38564	2.81716	6.51094	6.69378	4.27204	3.5005	5.22232	5.83358	5.30917	2.93981	3.99861	3.2527	0.328793	-0.842048	-0.52241	-0.282548	0.926078	0.966035	0.31814	0.0307738	0.607903	0.767595	0.631698	-0.221066	0.222713	-0.0751501	0	0	0	0	1	11
Synpcc7942_0066	637798472		hypothetical protein	chromosome	-	65658	67172	0	0.0592754	93.892	0		0.138904	0.167833	0.170893	0.170813	0.112791	0.141793	0.136542	0.146993	0.0930489	0.100443	0.129976	0.156181	0.15507	0.129561	-0.15959	0.113351	0.139414	0.13874	-0.460018	-0.129894	-0.184333	-0.0779305	-0.737615	-0.627296	-0.255431	0.00954	-0.000752941	-0.260045	0	0	0	0	0	0
Synpcc7942_0067	637798473		probable permease protein of ABC transporter	chromosome	-	67177	67986	1	0.163949	169.348	0		0.196177	0.172555	0.193572	0.209522	0.199768	0.158603	0.164827	0.18706	0.136743	0.173335	0.145471	0.21824	0.178578	0.173933	0.000822407	-0.184275	-0.0184624	0.0957673	0.0269941	-0.305913	-0.25038	-0.067833	-0.519869	-0.177768	-0.430596	0.154582	-0.134779	-0.1728	0	0	0	0	0	0
Synpcc7942_0068	637798474		ATPase	chromosome	-	67991	68980	1	0.281238	167.54	0		0.154724	0.122948	0.109984	0.120363	0.113426	0.106366	0.128995	0.163397	0.127528	0.157105	0.170146	0.217377	0.126497	0.116259	-0.172347	-0.504001	-0.664751	-0.534648	-0.62029	-0.713015	-0.434731	-0.0936609	-0.451233	-0.150311	-0.0352749	0.318155	-0.46294	-0.584702	0	0	0	0	0	0
Synpcc7942_0069	637798475		hypothetical protein	chromosome	+	69079	69375	1	0.524598	357.396	1	Dusk	0.532617	0.0972467	0.0472524	0.0547107	0.488461	1.04593	1.15136	0.0835142	0.430309	1.14078	1.81329	0.347508	0.214097	0.456675	0.0360054	-2.41737	-3.45864	-3.2472	-0.0888509	1.00962	1.14817	-2.637	-0.271722	1.13486	1.80344	-0.58005	-1.27883	-0.185927	0	0	0	0	1	12
Synpcc7942_0070	637798476		hypothetical protein	chromosome	-	69378	69938	0	0.0865759	42.4571	0		0.14928	0.216047	0.280351	0.346501	0.211353	0.144532	0.198478	0.210494	0.146351	0.0689366	0.0831698	0.127216	0.186025	0.187286	-0.279857	0.253465	0.629355	0.934978	0.221776	-0.326492	0.131097	0.2159	-0.308448	-1.39454	-1.12375	-0.510595	0.0376177	0.0473608	0	0	0	0	0	0
Synpcc7942_0071	637798477	degT	pleiotropic regulatory protein-like	chromosome	-	69940	71139	0	0.22197	186.189	0		0.362662	0.382088	0.489979	0.575738	0.53298	0.400147	0.398418	0.400814	0.367914	0.249416	0.199022	0.233777	0.339373	0.411116	-0.238257	-0.162976	0.195837	0.428532	0.3172	-0.0963516	-0.102598	-0.0939506	-0.217514	-0.77833	-1.10395	-0.871747	-0.334011	-0.0573375	0	0	0	0	0	0
Synpcc7942_0072	637798478		hypothetical protein	chromosome	-	71307	71960	1	0.164317	133.903	0		0.349134	0.395885	0.415854	0.476669	0.340201	0.278551	0.362294	0.338862	0.316218	0.263531	0.3023	0.340809	0.364418	0.381187	-0.0214833	0.159817	0.230812	0.427722	-0.0588767	-0.347325	0.0318953	-0.0645671	-0.164347	-0.427295	-0.229282	-0.0563014	0.0403298	0.105233	0	0	0	0	0	0
Synpcc7942_0073	637798479	lytB, ispH	4-hydroxy-3-methylbut-2-enyl diphosphate reductase	chromosome	-	72000	73196	0	0.0741121	250.798	0		0.578245	0.536868	0.551041	0.594276	0.57219	0.624597	0.58105	0.606781	0.617962	0.590686	0.603188	0.485696	0.606644	0.581313	0.100211	-0.00690362	0.0306895	0.139662	0.0850243	0.211457	0.107193	0.169707	0.196048	0.130921	0.161139	-0.151416	0.169379	0.107846	0	0	0	0	0	0
Synpcc7942_0074	637798480		hypothetical protein	chromosome	-	73306	73659	0	0.165348	163.219	0		0.0242637	0.0131124	0.00546813	0.0136004	0.0295536	0.0208224	0.0208697	0.0198015	0.0284441	0.0166245	0.0111697	0.024813	0.0191965	0.0161891	-0.529388	-1.41726	-2.67907	-1.36454	-0.244853	-0.750052	-0.746776	-0.822576	-0.300058	-1.07487	-1.64859	-0.497092	-0.867349	-1.11317	0	0	0	0	0	0
Synpcc7942_0075	637798481	pepP	aminopeptidase P. Metallo peptidase. MEROPS family M24B	chromosome	+	73775	75088	0	0.129428	307.873	0		0.961999	0.854881	1.0231	1.10058	0.979318	1.01535	1.00722	1.13751	0.938426	0.932861	0.854011	1.18362	1.00071	1.08309	-0.127233	-0.297545	-0.0383907	0.0669277	-0.101491	-0.0493588	-0.0609615	0.114543	-0.163025	-0.171607	-0.299015	0.171871	-0.0703116	0.0438166	0	0	0	0	0	0
Synpcc7942_0076	637798482		extracellular solute-binding protein, family 3	chromosome	+	75091	75852	0	0.0596504	267.996	0		0.390767	0.423704	0.468053	0.460445	0.452163	0.393846	0.454298	0.480478	0.300877	0.270312	0.319648	0.556193	0.481574	0.505155	-0.24744	-0.130691	0.0129221	-0.0107183	-0.036906	-0.236119	-0.0301082	0.0507222	-0.624574	-0.779121	-0.537264	0.261836	0.0540091	0.122979	0	0	0	0	0	0
Synpcc7942_0077	637798483		transcriptional regulator, XRE family	chromosome	+	75928	76617	0	0.131373	256.864	0		0.395235	0.5023	0.54144	0.574779	0.441728	0.436469	0.40534	0.64002	0.423199	0.414271	0.296843	0.581609	0.599359	0.587629	0.00401813	0.349858	0.458109	0.544315	0.164467	0.147185	0.0404391	0.699425	0.102644	0.0718828	-0.408992	0.561357	0.604727	0.576214	0	0	0	0	0	0
Synpcc7942_0078	637798484		hypothetical protein	chromosome	-	76614	77063	0	0.0974736	75.3071	0		0.74282	0.604006	0.621581	0.613854	0.798211	0.804974	0.735271	0.702173	0.660954	0.885565	0.694162	0.596567	0.711914	0.750329	0.303341	0.00489044	0.0462686	0.0282215	0.407097	0.41927	0.288603	0.222153	0.134877	0.556926	0.2056	-0.012989	0.24203	0.317851	0	0	0	0	0	0
Synpcc7942_0079	637798485	ycf41	conserved hypothetical protein YCF41	chromosome	-	77138	77584	0	0.0810368	346.372	0		1.19777	0.872283	0.883415	0.935711	1.49791	1.29095	1.1475	1.08445	1.85062	1.657	1.35518	0.99481	1.00771	1.15922	0.0930981	-0.364384	-0.34609	-0.263118	0.415701	0.201179	0.0312357	-0.0502849	0.720752	0.561323	0.271233	-0.17476	-0.156169	0.0459056	0	0	0	0	0	0
Synpcc7942_0080	637798486		probable ABC transporter permease protein	chromosome	-	77648	78871	0	0.150875	257.589	0		0.281868	0.239759	0.17752	0.222731	0.263829	0.295086	0.262129	0.249782	0.338552	0.354424	0.414146	0.316655	0.304562	0.242301	-0.0198187	-0.253254	-0.686855	-0.359531	-0.115233	0.0462998	-0.124561	-0.194169	0.24454	0.31064	0.535302	0.148075	0.0919009	-0.238036	0	0	0	0	0	0
Synpcc7942_0081	637798487		RNA-binding S4	chromosome	-	78987	79196	0	0.123216	10.2866	0		0.640793	0.523123	0.403275	0.452796	0.684181	0.531524	0.655864	0.459613	0.656528	0.83272	0.606294	0.726755	0.503887	0.532159	0.00891885	-0.283791	-0.659178	-0.49208	0.103437	-0.260806	0.0424556	-0.47052	0.0439161	0.386891	-0.0709239	0.19053	-0.337839	-0.259083	0	0	0	0	0	0
Synpcc7942_0082	637798488	mdlB	ATPase	chromosome	+	79265	81013	1	0.258631	137.517	0		0.266832	0.234434	0.331197	0.439062	0.406755	0.374487	0.331589	0.362557	0.304685	0.208139	0.184479	0.265234	0.247555	0.288349	-0.411158	-0.597905	-0.0993973	0.307336	0.197074	0.077828	-0.0976906	0.0311207	-0.219768	-0.769542	-0.943631	-0.41982	-0.519339	-0.299269	0	0	0	0	0	0
Synpcc7942_0083	637798489		hypothetical protein	chromosome	+	81023	81220	0	0.159402	152.553	0		0.177137	0.0781447	0.151533	0.112461	0.112722	0.127639	0.122598	0.103485	0.0977974	0.089168	0.0878686	0.127543	0.0956083	0.0964806	0.218515	-0.962135	-0.00671735	-0.436932	-0.433588	-0.254289	-0.312413	-0.556933	-0.638486	-0.771756	-0.792934	-0.255374	-0.671146	-0.658044	0	0	0	0	0	0
Synpcc7942_0084	637798490		hypothetical protein	chromosome	+	81217	81918	0	0.11086	247.887	0		0.239613	0.318857	0.295735	0.266617	0.248385	0.291005	0.255584	0.216606	0.156676	0.215571	0.218545	0.308903	0.342958	0.322468	0.0354432	0.447647	0.339041	0.189506	0.0873171	0.315782	0.128537	-0.110188	-0.577474	-0.1171	-0.0973317	0.401894	0.552769	0.463892	0	0	0	0	0	0
Synpcc7942_0085	637798491		HAD-superfamily hydrolase subfamily IA, variant 3	chromosome	-	82179	82865	1	0.43462	353.513	0		0.113566	0.118616	0.097913	0.0981128	0.0873101	0.194663	0.259628	0.0729936	0.0924506	0.078321	0.212957	0.179	0.182995	0.182133	-0.174072	-0.111306	-0.388034	-0.385092	-0.553385	0.603372	1.01884	-0.811763	-0.470851	-0.710135	0.732955	0.482357	0.514199	0.50739	0	0	0	0	0	0
Synpcc7942_0086	637798492	glgX	isoamylase. Glycosyl Hydrolase family 13.	chromosome	-	82871	84955	1	0.500778	355.728	1	Dusk	0.40784	0.291148	0.239296	0.24852	0.43855	0.689891	0.841546	0.250597	0.362945	0.647178	1.05556	0.488955	0.428825	0.513769	-0.0772685	-0.56352	-0.846478	-0.791909	0.0274709	0.681097	0.967771	-0.779901	-0.24552	0.588891	1.29467	0.184429	-0.00488386	0.255849	0	0	0	0	0	0
Synpcc7942_0087	637798493		hypothetical protein	chromosome	-	84964	86475	0	0.152418	63.2717	0		0.401443	0.380335	0.401034	0.37733	0.55216	0.637243	0.631712	0.418673	0.603457	0.681144	0.780357	0.454222	0.509152	0.513271	-0.0335611	-0.111484	-0.0350297	-0.122929	0.426332	0.633089	0.620512	0.0270693	0.554495	0.729205	0.925379	0.144643	0.309342	0.320965	0	0	0	0	0	0
Synpcc7942_0088	637798494		hypothetical protein	chromosome	+	86547	87269	0	0.090555	189.614	0		0.343535	0.272501	0.283798	0.292169	0.490059	0.434024	0.424063	0.28042	0.414596	0.43955	0.516274	0.277911	0.286001	0.340184	0.223339	-0.110855	-0.0522514	-0.0103163	0.735838	0.560659	0.527161	-0.0695299	0.49459	0.57891	0.811019	-0.0824945	-0.0410968	0.209198	0	0	0	0	0	0
Synpcc7942_0089	637798495	clcD	Carboxymethylenebutenolidase	chromosome	-	87881	88615	0	0.186623	137.407	0		0.606709	0.505931	0.531993	0.616556	0.631989	0.640407	0.748841	0.832659	0.604891	0.470121	0.463731	0.790244	0.527662	0.601034	-0.229098	-0.491162	-0.418694	-0.205871	-0.170202	-0.151113	0.0745562	0.227624	-0.233427	-0.597071	-0.616814	0.152196	-0.430489	-0.242655	0	0	0	0	0	0
Synpcc7942_0090	637798496		transcriptional regulator, GntR family	chromosome	+	88735	89718	1	0.205273	209.342	0		0.453182	0.313961	0.332456	0.431792	0.529479	0.425916	0.449945	0.512908	0.467567	0.423781	0.412286	0.430152	0.340862	0.458165	-0.0211993	-0.550706	-0.468127	-0.0909539	0.203283	-0.11072	-0.0315411	0.157411	0.0238841	-0.11797	-0.157643	-0.0964421	-0.432099	-0.00542198	0	0	0	0	0	0
Synpcc7942_0091	637798497	ycf21	conserved hypothetical protein YCF21	chromosome	-	89715	90326	0	0.0512265	316.735	0		0.199997	0.682617	0.460208	0.306809	0.126501	0.142811	0.150034	0.179737	0.117702	0.162101	0.178322	0.368683	0.322804	0.26142	0.0856876	1.85678	1.28799	0.703047	-0.575143	-0.400182	-0.329002	-0.0684054	-0.679153	-0.217401	-0.0798113	0.968088	0.776366	0.472075	0	0	1	8	0	0
Synpcc7942_0092	637798498		hypothetical protein	chromosome	-	90583	90930	1	0.374327	213.806	1	Dusk	0.64379	0.59134	0.699473	0.703849	0.539133	0.574924	0.492829	0.650772	0.730041	0.690942	0.563571	1.09798	0.679275	0.496792	0.0921686	-0.0304358	0.211845	0.220844	-0.163781	-0.0710516	-0.293335	0.107729	0.273554	0.194142	-0.0998247	0.862352	0.169574	-0.281782	0	0	0	0	0	0
Synpcc7942_0093	637798499	tmk	Thymidylate kinase	chromosome	+	91029	91676	0	0.146507	138.158	0		0.24743	0.226041	0.221801	0.224753	0.186206	0.182003	0.222321	0.194715	0.205592	0.185531	0.223333	0.27873	0.236705	0.24837	-0.002228	-0.132666	-0.159983	-0.14091	-0.412348	-0.445285	-0.156606	-0.347884	-0.269465	-0.417591	-0.150054	0.169619	-0.0661557	0.00324453	0	0	0	0	0	0
Synpcc7942_0094	637798500	dnaX, dnaZ	DNA polymerase III subunit delta	chromosome	+	91676	92611	0	0.0430186	92.4329	0		0.0504717	0.0661224	0.0723826	0.0565811	0.0245901	0.0393757	0.0529962	0.0397495	0.027308	0.0215571	0.0422445	0.0586526	0.0793436	0.0566359	-0.16862	0.221046	0.35155	-0.00377295	-1.20601	-0.526788	-0.0982056	-0.513155	-1.05477	-1.39593	-0.425329	0.0481008	0.48402	-0.00237544	0	0	0	0	0	0
Synpcc7942_0095	637798501	rpaA, rre31, crr31	two component transcriptional regulator, winged helix family	chromosome	-	92590	93339	0	0.338435	14.919	0		5.42466	5.34391	5.65359	5.05446	4.30662	4.46901	3.05366	3.68245	4.66076	4.3942	3.96358	2.95941	3.48773	3.20169	0.456408	0.434772	0.516043	0.354434	0.123432	0.176832	-0.372584	-0.102457	0.237441	0.152476	0.00367994	-0.417813	-0.180834	-0.304291	1	6	0	0	1	15
Synpcc7942_0096	637798502		hypothetical protein	chromosome	-	93764	94285	1	0.44456	290.516	1	Dusk	0.416853	0.0533539	0.0723113	0.121055	1.29739	1.44235	0.612625	0.288199	1.33692	1.85057	1.47104	0.177737	0.22689	0.18481	0.668969	-2.2969	-1.85827	-1.1149	2.30698	2.45978	1.22444	0.136497	2.35028	2.81933	2.4882	-0.56082	-0.208575	-0.504524	0	0	1	9	0	0
Synpcc7942_0097	637798503	cobN	cobaltochelatase	chromosome	-	94375	98166	0	0.0389157	111.842	0		0.0673875	0.12037	0.125704	0.107445	0.0693419	0.0733114	0.0712515	0.0716673	0.0608696	0.058975	0.0577681	0.0935248	0.096772	0.080604	-0.182131	0.654792	0.71735	0.49091	-0.140884	-0.0605742	-0.101692	-0.0932973	-0.32889	-0.374508	-0.40434	0.290737	0.339977	0.0762394	0	0	0	0	0	0
Synpcc7942_0098	637798504	pyk2, pykF, pyk	pyruvate kinase	chromosome	-	98302	100086	0	0.095386	4.1074	0		1.06745	0.885018	1.05434	1.2505	1.23551	1.25772	1.35223	1.26058	1.12994	1.06115	1.13373	0.98172	0.985476	1.18766	-0.213754	-0.484149	-0.231584	0.0145754	-0.00282034	0.0228863	0.127412	0.0261549	-0.131682	-0.222296	-0.126855	-0.334545	-0.329035	-0.0598069	0	0	0	0	1	16
Synpcc7942_0099	637798505		hypothetical protein	chromosome	+	100202	100531	0	0.16092	29.6114	0		0.349214	0.300076	0.325553	0.313674	0.492453	0.405253	0.390183	0.338232	0.335641	0.303171	0.316327	0.27283	0.254465	0.319833	-0.00262998	-0.221415	-0.10385	-0.157473	0.493246	0.212081	0.15741	-0.0487257	-0.0598228	-0.206608	-0.145324	-0.358736	-0.459272	-0.129422	0	0	0	0	0	0
Synpcc7942_0100	637798506		hypothetical protein	chromosome	-	100528	101082	1	0.743467	335.58	1	Dusk	0.559727	0.0669087	0.0549325	0.0531334	0.584363	1.23137	1.06587	0.163221	0.664303	1.93897	2.4152	0.255205	0.197657	0.200497	0.347878	-2.71658	-3.00111	-3.04915	0.410021	1.48534	1.27712	-1.43002	0.594998	2.14038	2.45723	-0.785187	-1.15385	-1.13326	1	7	1	10	1	17
Synpcc7942_0101	637798507	ndbA	type 2 NADH dehydrogenase	chromosome	+	101259	102593	1	0.158067	124.286	1	Dawn	1.40904	2.20558	2.0093	1.52956	1.05795	1.22261	1.21234	1.29976	1.0809	1.03343	1.24161	1.5166	1.57908	1.40662	-0.204176	0.442267	0.307807	-0.08577	-0.617612	-0.40893	-0.421093	-0.320642	-0.58666	-0.651445	-0.386673	-0.0980436	-0.0398024	-0.206655	1	7	1	10	1	17
Synpcc7942_0102	637798508		hypothetical protein	chromosome	+	102674	103237	0	0.232147	305.292	0		0.747508	0.818441	0.647813	0.510051	0.631924	0.664671	0.718579	0.435002	0.60289	0.717003	0.91561	0.643406	0.687644	0.609675	0.0304741	0.161264	-0.176036	-0.520973	-0.211864	-0.138973	-0.0264676	-0.750593	-0.27972	-0.0296357	0.323119	-0.185885	-0.0899516	-0.263574	0	0	0	0	0	0
Synpcc7942_0103	637798509		Ankyrin	chromosome	-	103268	103645	1	0.0804855	205.851	0		0.0681695	0.069586	0.0601711	0.0668686	0.0664253	0.0752156	0.0809708	0.0641918	0.102454	0.0934141	0.104606	0.0711651	0.0950246	0.0745427	-0.212842	-0.183172	-0.392897	-0.24064	-0.250235	-0.0709364	0.0354336	-0.29958	0.374942	0.241671	0.404918	-0.150799	0.266333	-0.0839013	0	0	0	0	0	0
Synpcc7942_0104	637798510		hypothetical protein	chromosome	-	103632	104408	1	0.0795549	265.346	0		0.187006	0.151341	0.127678	0.147937	0.184914	0.197864	0.156207	0.179043	0.300053	0.313785	0.276837	0.201366	0.213649	0.140139	0.173577	-0.1317	-0.376998	-0.164521	0.157348	0.255009	-0.0860495	0.110802	0.855713	0.920271	0.739533	0.280318	0.36574	-0.242646	0	0	0	0	0	0
Synpcc7942_0105	637798511	nadE, adgA	NAD synthetase	chromosome	-	104653	106377	0	0.0665677	109.111	0		0.0958523	0.104646	0.0976275	0.101873	0.0978474	0.0830206	0.106153	0.0987772	0.0835173	0.102349	0.125614	0.119663	0.119872	0.0941315	-0.212994	-0.0863625	-0.186519	-0.125109	-0.183273	-0.420337	-0.0657317	-0.169628	-0.411732	-0.118377	0.177118	0.107104	0.109613	-0.239129	0	0	0	0	0	0
Synpcc7942_0106	637798512	nadD	nicotinic acid mononucleotide adenyltransferase	chromosome	-	106374	106952	0	0.0664932	156.671	0		0.152057	0.114909	0.0977889	0.0873103	0.0770947	0.11094	0.118483	0.132242	0.139126	0.161176	0.172095	0.182048	0.187787	0.164967	0.0630963	-0.341021	-0.573772	-0.737291	-0.916812	-0.391738	-0.296831	-0.138337	-0.0651258	0.147119	0.241691	0.322803	0.367583	0.180661	0	0	0	0	0	0
Synpcc7942_0107	637798513		Small GTP-binding protein domain	chromosome	-	106965	108383	0	0.0571051	267.571	0		0.216399	0.149747	0.127206	0.151833	0.186286	0.218915	0.229082	0.162257	0.265281	0.292684	0.333269	0.205435	0.192585	0.197224	0.0354161	-0.495748	-0.731105	-0.475793	-0.180757	0.0520965	0.117588	-0.379991	0.329248	0.47107	0.658413	-0.0395911	-0.13278	-0.0984382	0	0	0	0	0	0
Synpcc7942_0108	637798514		sulfiredoxin	chromosome	+	108556	108816	0	0.0660753	318.227	0		0.0713037	0.082995	0.0760196	0.0830093	0.0614625	0.0806911	0.0828964	0.105363	0.124641	0.0901929	0.154528	0.0546885	0.0446341	0.0494047	0.00188692	0.220934	0.0942803	0.221182	-0.212384	0.180318	0.219219	0.565207	0.807617	0.340923	1.1177	-0.380855	-0.673944	-0.527443	0	0	0	0	0	0
Synpcc7942_0109	637798515		DNA-binding ferritin-like protein (oxidative damage protectant)-like	chromosome	+	108877	109383	0	0.231329	19.432	0		1.32426	0.807711	0.716827	0.829724	1.53525	1.78411	1.49257	1.26029	2.3695	2.84719	2.46448	1.35352	1.11919	1.10587	0.265018	-0.448262	-0.620476	-0.409468	0.478301	0.695031	0.437622	0.193579	1.10441	1.36937	1.16111	0.296544	0.0222792	0.00501288	0	0	0	0	0	0
Synpcc7942_0110	637798516		transcriptional regulator, XRE family	chromosome	+	109390	109947	1	0.136406	14.3117	0		0.791463	0.604487	0.486531	0.534949	0.896206	1.09265	0.990159	0.823312	1.21042	1.49312	1.55046	0.957285	0.713306	0.729206	0.179617	-0.209193	-0.522372	-0.385504	0.358926	0.644853	0.502756	0.236534	0.792527	1.09535	1.14972	0.454045	0.0296168	0.0614226	0	0	0	0	0	0
Synpcc7942_0111	637798517	dnaK	DnaK protein-like	chromosome	+	110012	111607	0	0.141442	4.75526	0		0.147551	0.152206	0.159491	0.144044	0.155575	0.162967	0.162015	0.123992	0.125695	0.161192	0.199686	0.134839	0.14203	0.133758	-0.023139	0.02167	0.0891174	-0.0578445	0.0532572	0.120228	0.111775	-0.274112	-0.254422	0.104426	0.413383	-0.153114	-0.0781576	-0.164729	0	0	0	0	0	0
Synpcc7942_0112	637798518	phr, phrA	Deoxyribodipyrimidine photo-lyase type I	chromosome	+	111686	113140	1	0.113114	185.603	0		0.0619851	0.129027	0.156653	0.160485	0.0647133	0.0593454	0.0663713	0.117478	0.0606868	0.0583597	0.0434814	0.0905547	0.0887391	0.0810735	-0.526689	0.530996	0.810896	0.845754	-0.464546	-0.589473	-0.428049	0.395705	-0.557226	-0.613636	-1.03821	0.0201807	-0.00903956	-0.139379	0	0	0	0	0	0
Synpcc7942_0113	637798519	petL	cytochrome b6f complex subunit PetL	chromosome	+	113196	113288	0	0.0855638	128.937	0		0.138538	0.0942778	0.239363	0.161779	0.149993	0.181164	0.11916	0.110161	0.1166	0.108481	0.0765307	0.141674	0.140921	0.138652	-0.337277	-0.89257	0.451641	-0.113537	-0.222668	0.0497409	-0.554665	-0.66794	-0.585995	-0.690119	-1.19345	-0.304981	-0.312668	-0.336092	0	0	0	0	0	0
Synpcc7942_0114	637798520		hypothetical protein	chromosome	+	113327	113698	1	0.450225	120.699	1	Dawn	2.65339	3.53126	4.31894	4.69159	3.09547	2.95525	2.97615	3.41935	2.52563	1.78089	1.60927	2.41437	3.00241	3.21339	-0.358544	0.053802	0.344298	0.463696	-0.13622	-0.203102	-0.192932	0.00734316	-0.429734	-0.933778	-1.07997	-0.494735	-0.180259	-0.0822855	0	0	0	0	1	18
Synpcc7942_0115	637798521		hypothetical protein	chromosome	-	113631	114146	0	0.0937475	299.942	0		0.0138717	0.0869587	0.0337625	0.0128294	0.0162201	0.0224481	0.0245445	0.0229896	0.0165118	0.0407329	0.033717	0.236192	0.0178731	0.0212874	-0.720607	1.92758	0.562671	-0.833294	-0.494966	-0.0261602	0.102647	0.00823093	-0.469251	0.833442	0.560726	3.36914	-0.354961	-0.10275	0	0	0	0	0	0
Synpcc7942_0116	637798522	cscK	fructokinase	chromosome	+	114299	115273	0	0.0991081	208.741	0		0.0308336	0.0343837	0.0277949	0.0271589	0.0357675	0.0388807	0.0357217	0.0492203	0.0794416	0.0793301	0.0729986	0.0568695	0.0433123	0.0264505	-0.311581	-0.154361	-0.461262	-0.494657	-0.0974354	0.02297	-0.0992844	0.36317	1.05381	1.05178	0.931784	0.571572	0.178692	-0.532788	0	0	0	0	0	0
Synpcc7942_0117	637798523		thiol methyltransferase 1-like	chromosome	+	115391	116722	0	0.0951367	183.946	0		0.111236	0.0584677	0.0512268	0.0447297	0.0963466	0.102772	0.0748773	0.0744856	0.144212	0.210182	0.140709	0.0972681	0.0860011	0.0785208	0.995351	0.0674381	-0.123304	-0.31897	0.788032	0.881175	0.424326	0.41676	1.36991	1.91336	1.33444	0.801765	0.624153	0.492874	0	0	0	0	0	0
Synpcc7942_0118	637798524	gatB, pet112	aspartyl/glutamyl-tRNA amidotransferase subunit B	chromosome	+	116943	118427	0	0.163433	67.2631	0		1.65762	1.72995	1.96407	1.9631	1.89044	1.79758	1.72029	1.87217	1.84642	1.72278	1.694	1.44474	1.88536	1.96756	-0.0333153	0.0283005	0.211417	0.210704	0.156291	0.0836244	0.0202202	0.142282	0.122298	0.0223108	-0.00199487	-0.231615	0.152413	0.213978	0	0	0	0	1	19
Synpcc7942_0119	637798525		hypothetical protein	chromosome	-	118735	119292	1	0.215084	137.137	1	Dawn	0.0551587	0.0831863	0.0919293	0.0657901	0.00374982	0.0113228	0.0236428	0.061845	0.015269	0.0256135	0.00850342	0.239075	0.0391448	0.047929	-1.4506	-0.857842	-0.713663	-1.19632	-5.3293	-3.73496	-2.67279	-1.28553	-3.30358	-2.55728	-4.14807	0.665207	-1.94536	-1.65329	0	0	0	0	0	0
Synpcc7942_0120	637798526		Cytosine/adenosine deaminase-like	chromosome	-	119508	119993	0	0.3283	120.756	0		0.0736399	0.0700408	0.103557	0.0495323	0.0660153	0.073668	0.0629773	0.0610218	0.0749056	0.0882244	0.0553247	0.0869796	0.0629217	0.0746831	-0.246666	-0.318958	0.245199	-0.818784	-0.404353	-0.246116	-0.472321	-0.517828	-0.22208	0.0140245	-0.65923	-0.00647667	-0.473595	-0.226372	0	0	0	0	0	0
Synpcc7942_0121	637798527		hypothetical protein	chromosome	-	120013	121239	0	0.0649395	216.686	0		0.0997542	0.105085	0.103333	0.0936814	0.107434	0.102126	0.0890263	0.0711917	0.08522	0.0781115	0.0702519	0.0760619	0.0779324	0.0755096	0.166976	0.242077	0.217827	0.0763616	0.273972	0.200884	0.00282984	-0.319692	-0.0602084	-0.185866	-0.338863	-0.224227	-0.189178	-0.234741	0	0	0	0	0	0
Synpcc7942_0122	637798528		EAL	chromosome	-	121831	123408	0	0.101759	230.622	0		0.15377	0.0745197	0.0831083	0.100684	0.369065	0.264923	0.206334	0.125064	0.321013	0.363889	0.33928	0.11098	0.150417	0.160706	0.767417	-0.277665	-0.120295	0.156479	2.03051	1.55221	1.19162	0.469309	1.82927	2.01014	1.90912	0.296946	0.735612	0.831066	0	0	0	0	0	0
Synpcc7942_0123	637798529		hypothetical protein	chromosome	-	123808	123897	0	0.0382748	26.8064	0		0.0874842	0.0687673	0.102163	0.0802423	0.061997	0.0936017	0.0644974	0.107842	0.0774555	0.0373656	0.061508	0.0365992	0.134832	0.0955157	0.369292	0.021992	0.593069	0.244632	-0.127533	0.466803	-0.0704888	0.671119	0.193638	-0.858019	-0.138956	-0.887919	0.993363	0.496008	0	0	0	0	0	0
Synpcc7942_0124	637798530		thiol methyltransferase 1-like	chromosome	-	124070	124669	1	0.138582	351.59	0		0.547572	0.603433	0.679114	0.617866	0.548673	0.661647	0.814427	0.431369	0.37695	0.417561	0.64188	0.516049	0.650431	0.62324	-0.105636	0.03451	0.204971	0.0686092	-0.102737	0.167377	0.467101	-0.449762	-0.644309	-0.496697	0.12362	-0.191177	0.142711	0.0811045	0	0	0	0	0	0
Synpcc7942_0125	637798531	hisB	imidazoleglycerol-phosphate dehydratase	chromosome	-	124738	125367	0	0.118122	295.736	0		1.30545	1.70199	1.85814	1.89811	1.61746	1.74166	2.00445	1.4533	1.28847	1.28645	1.78875	1.35853	1.61568	1.74657	-0.218534	0.164146	0.290779	0.321488	0.0906497	0.197385	0.400127	-0.0637424	-0.237422	-0.239687	0.235878	-0.161034	0.0890603	0.20145	0	0	0	0	0	0
Synpcc7942_0126	637798532	envM, fabI	enoyl-(acyl carrier protein) reductase	chromosome	-	125382	126158	0	0.20094	144.076	0		0.627344	1.17621	1.57262	1.56534	0.767482	0.750801	0.866607	1.05066	0.466528	0.347327	0.319584	0.597033	0.842103	1.02092	-0.646378	0.260443	0.679459	0.672774	-0.355502	-0.387204	-0.180257	0.0975943	-1.07367	-1.49934	-1.61944	-0.717823	-0.221638	0.0561697	0	0	0	0	1	22
Synpcc7942_0127	637798533	ntcA	transcriptional regulator, Crp/Fnr family	chromosome	+	126390	127058	0	0.256351	154.952	0		0.702941	0.809481	0.373978	0.349036	0.446211	1.04357	0.9718	1.14613	0.669197	0.623319	0.453922	2.68668	0.774167	0.668182	-0.390021	-0.186427	-1.30047	-1.40005	-1.0457	0.180038	0.0772357	0.31527	-0.460992	-0.563453	-1.02098	1.54433	-0.25078	-0.463183	0	0	0	0	1	22
Synpcc7942_0128	637798534		hypothetical protein	chromosome	+	127151	128449	0	0.190824	185.715	0		0.477738	0.386717	0.332678	0.317355	0.480011	0.624191	0.525675	0.344531	0.478209	0.573429	0.682453	0.466576	0.377406	0.404416	0.124046	-0.180895	-0.398045	-0.466072	0.130895	0.509816	0.261999	-0.34754	0.125469	0.387442	0.638558	0.089941	-0.216056	-0.116332	0	0	0	0	0	0
Synpcc7942_0129	637798535		Resolvase, RNase H-like fold	chromosome	+	128446	128877	0	0.0817011	253.001	0		0.2883	0.231612	0.194916	0.190854	0.285767	0.238879	0.257745	0.203452	0.233084	0.256889	0.309371	0.232557	0.270788	0.22884	0.19477	-0.121092	-0.369949	-0.400332	0.182038	-0.076521	0.0331448	-0.308112	-0.111953	0.0283411	0.296535	-0.115216	0.104362	-0.138464	0	0	0	0	0	0
Synpcc7942_0130	637798536		hypothetical protein	chromosome	-	128822	129409	0	0.391644	324.801	0		1.31348	0.570137	0.580222	0.64071	2.26202	1.8589	1.32375	1.08209	2.58317	2.77669	2.10616	1.04756	0.85192	1.00714	0.421374	-0.78264	-0.757345	-0.614277	1.20559	0.922428	0.432613	0.1418	1.39712	1.50134	1.10259	0.0950099	-0.203232	0.0382415	1	8	1	14	0	0
Synpcc7942_0131	637798537		cyclic nucleotide-binding domain (cNMP-BD) protein	chromosome	-	129670	132495	1	0.0613815	291.014	0		0.100807	0.0994644	0.100348	0.0917846	0.105632	0.128926	0.13314	0.114101	0.117855	0.147559	0.149153	0.129185	0.131569	0.114578	-0.0167043	-0.036047	-0.0232909	-0.151975	0.0507446	0.338242	0.384649	0.162007	0.208717	0.532988	0.548492	0.34114	0.367518	0.168035	0	0	0	0	0	0
Synpcc7942_0132	637798538		hypothetical protein	chromosome	-	132721	133770	0	0.0873531	263.799	0		0.0334031	0.0407692	0.0410188	0.0487185	0.0418479	0.0521495	0.0512629	0.0482722	0.0501617	0.031227	0.0384111	0.0491475	0.0351334	0.047303	-0.493048	-0.205549	-0.196743	0.0514426	-0.167871	0.149625	0.124887	0.0381653	0.0935578	-0.590235	-0.291503	0.0640897	-0.420184	0.00890466	0	0	0	0	0	0
Synpcc7942_0133	637798539		hypothetical protein	chromosome	+	133915	134754	0	0.0471923	46.9312	0		0.426912	0.322961	0.364675	0.317387	0.382776	0.406164	0.431588	0.306195	0.402031	0.374324	0.476374	0.36011	0.333999	0.3127	0.109039	-0.293539	-0.118285	-0.318655	-0.0483979	0.0371657	0.124758	-0.370448	0.0224096	-0.080612	0.267195	-0.13646	-0.245055	-0.340117	0	0	0	0	0	0
Synpcc7942_0134	637798540		hypothetical protein	chromosome	+	134745	136052	0	0.0699821	16.0296	0		0.45475	0.408897	0.603432	0.564549	0.438849	0.479011	0.433704	0.38998	0.335167	0.305953	0.390572	0.436504	0.430845	0.314369	0.14964	-0.00369454	0.557758	0.461665	0.0982909	0.224625	0.0812763	-0.0720337	-0.290553	-0.422126	-0.0698447	0.0905621	0.0717345	-0.382972	0	0	0	0	0	0
Synpcc7942_0135	637798541	rapQ	Methylase involved in ubiquinone/menaquinone biosynthesis-like	chromosome	-	136016	136651	0	0.0568399	225.72	0		0.14068	0.118397	0.134679	0.115443	0.0932148	0.0976857	0.129437	0.105129	0.0998641	0.0806357	0.129316	0.173501	0.132797	0.117142	-0.0121741	-0.260964	-0.0750718	-0.297412	-0.605961	-0.538372	-0.132337	-0.432428	-0.506554	-0.8151	-0.13369	0.290352	-0.0953685	-0.276334	0	0	0	0	0	0
Synpcc7942_0136	637798542		phage integrase	chromosome	-	136706	138013	0	0.0726562	57.2595	0		0.109446	0.0871421	0.0758452	0.0855795	0.0986477	0.106268	0.130313	0.0832727	0.102445	0.106698	0.125152	0.154455	0.0894346	0.105155	-0.29479	-0.623574	-0.823885	-0.649678	-0.444658	-0.337309	-0.0430364	-0.689101	-0.390165	-0.331486	-0.10133	0.202174	-0.586111	-0.352499	0	0	0	0	0	0
Synpcc7942_0137	637798543	hemH	ferrochelatase	chromosome	+	138115	139278	0	0.105668	116.09	0		1.64371	1.62879	1.75653	1.76409	1.91084	1.82921	1.98026	1.61624	1.74874	1.68795	1.81874	1.51255	1.59046	1.92057	-0.0994024	-0.112556	-0.00362981	0.00256481	0.117848	0.0548638	0.16933	-0.123714	-0.0100443	-0.0610836	0.0465841	-0.219379	-0.146911	0.125177	0	0	0	0	0	0
Synpcc7942_0138	637798544		Membrane proteins, metalloendopeptidase-like	chromosome	+	139416	140018	1	0.416273	226.877	1	Dusk	1.61792	1.14783	0.99033	1.13577	1.57884	1.56992	0.977526	1.42091	1.53627	1.75674	1.40196	1.08523	1.03519	0.895757	0.750565	0.255334	0.0424031	0.24009	0.715287	0.707116	0.0236284	0.563233	0.67585	0.869324	0.543871	0.174422	0.106317	-0.102399	0	0	0	0	0	0
Synpcc7942_0139	637798545	ilvB	acetolactate synthase 3 catalytic subunit	chromosome	+	140268	142106	0	0.149841	287.443	0		5.60675	3.87335	4.06906	3.84947	6.50627	6.70004	5.00073	4.36236	7.98689	7.71283	8.45388	3.40558	4.98039	4.13097	0.17456	-0.359022	-0.287908	-0.367944	0.389226	0.431565	0.00953431	-0.187495	0.68503	0.634657	0.76701	-0.544705	0.00365491	-0.266125	0	0	0	0	1	23
Synpcc7942_0140	637798546		hypothetical protein	chromosome	-	142233	142631	0	0.119628	225.588	0		0.65658	0.917759	0.933899	0.953254	0.652017	0.588529	0.785608	0.693271	0.634786	0.564699	0.640186	0.704466	0.733568	0.732527	-0.175409	0.307736	0.332887	0.362482	-0.18547	-0.333265	0.0834303	-0.0969592	-0.224109	-0.392898	-0.211889	-0.0738499	-0.0154478	-0.0174979	0	0	0	0	0	0
Synpcc7942_0141	637798547	secF	preprotein translocase subunit SecF	chromosome	-	142618	143562	0	0.114679	27.1842	0		0.761226	1.13029	1.41082	1.40297	0.845816	0.801186	0.76671	0.979709	0.713083	0.49376	0.435996	0.708746	0.932269	0.869244	-0.111317	0.458985	0.778821	0.770766	0.040701	-0.0375058	-0.100961	0.252712	-0.205573	-0.735832	-0.915328	-0.214373	0.181103	0.0801187	0	0	0	0	0	0
Synpcc7942_0142	637798548	secD	preprotein translocase subunit SecD	chromosome	-	143572	144966	0	0.12335	88.1167	0		0.903063	1.21489	1.65716	1.84514	1.20094	0.906577	1.00699	1.17969	0.830079	0.567716	0.562359	0.799279	1.06126	1.01747	-0.221105	0.206821	0.654705	0.809728	0.190162	-0.215502	-0.0639506	0.164408	-0.342683	-0.890761	-0.90444	-0.397232	0.0117749	-0.049024	0	0	0	0	0	0
Synpcc7942_0143	637798549	pdhB, acoB	pyruvate/2-oxoglutarate dehydrogenase complex dehydrogenase (E1) component	chromosome	-	145003	145983	0	0.0933159	249.229	0		2.08751	2.17868	2.76743	2.87167	3.08847	2.96477	2.26951	2.16344	2.67581	2.85813	2.67959	1.40185	1.95346	2.07632	0.0388298	0.100504	0.445592	0.498936	0.603941	0.544967	0.159431	0.0903747	0.397023	0.492118	0.39906	-0.535621	-0.0569213	0.0310787	0	0	0	0	1	25
Synpcc7942_0144	637798550		hypothetical protein	chromosome	+	146268	146720	0	0.190882	175.287	0		0.251234	0.303988	0.259591	0.203263	0.212473	0.213858	0.235313	0.261869	0.222279	0.254259	0.260114	0.292066	0.220732	0.232991	0.120096	0.395079	0.167307	-0.185589	-0.121656	-0.112282	0.0256444	0.179907	-0.0565662	0.137366	0.170211	0.337361	-0.0666397	0.0113385	0	0	0	0	0	0
Synpcc7942_0145	637798551		hypothetical protein	chromosome	-	146717	147040	0	0.153803	301.264	0		0.265104	0.299265	0.386845	0.391924	0.409008	0.409507	0.358319	0.342832	0.320341	0.225751	0.309981	0.293132	0.32959	0.316912	-0.400887	-0.226019	0.144312	0.163131	0.224685	0.226446	0.033802	-0.0299426	-0.127835	-0.632713	-0.175263	-0.255891	-0.0867712	-0.143362	0	0	0	0	0	0
Synpcc7942_0146	637798552		hypothetical protein	chromosome	+	147160	147855	0	0.149844	165.393	0		0.183059	0.120787	0.120287	0.0907914	0.142299	0.152809	0.141025	0.123957	0.19809	0.247628	0.24429	0.168798	0.139482	0.129687	0.216524	-0.383312	-0.3893	-0.795155	-0.146856	-0.044055	-0.159831	-0.345947	0.330377	0.652391	0.632812	0.0995159	-0.175707	-0.280745	0	0	0	0	0	0
Synpcc7942_0147	637798553		hypothetical protein	chromosome	-	148159	148491	0	0.0945462	172.127	0		0.447094	0.284982	0.241238	0.227715	0.423087	0.452197	0.472242	0.344901	0.855965	1.01998	1.11142	0.461611	0.44604	0.403002	0.0980714	-0.551637	-0.792048	-0.875279	0.0184497	0.114446	0.17702	-0.276324	1.03505	1.28796	1.41183	0.144173	0.094666	-0.0517193	0	0	0	0	0	0
Synpcc7942_0148	637798554		hypothetical protein	chromosome	+	148646	150190	1	0.313868	5.96225	0		0.330324	0.331151	0.367724	0.347846	0.348056	0.397353	0.505847	0.270827	0.285758	0.311803	0.543079	0.334012	0.411251	0.454395	0.0100531	0.0136606	0.164793	0.0846206	0.0854884	0.27659	0.62487	-0.276458	-0.199034	-0.073193	0.727333	0.0260703	0.326191	0.470118	0	0	0	0	0	0
Synpcc7942_0149	637798555		methylated-DNA--protein-cysteine methyltransferase	chromosome	-	150187	150744	0	0.154119	76.9312	0		0.119297	0.151584	0.122283	0.157465	0.147493	0.0886951	0.113485	0.106296	0.074957	0.0753339	0.072279	0.177093	0.122654	0.145499	-0.184204	0.161359	-0.14853	0.216271	0.121887	-0.611831	-0.256253	-0.350669	-0.854623	-0.847386	-0.907108	0.385749	-0.144165	0.102251	0	0	0	0	0	0
Synpcc7942_0150	637798556		Dolichyl-phosphate beta-D-mannosyltransferase	chromosome	-	150752	151918	1	0.19453	147.835	0		0.146591	0.132585	0.12233	0.153677	0.166149	0.164224	0.169119	0.131684	0.131416	0.112385	0.105713	0.174999	0.116878	0.136276	-0.304943	-0.449821	-0.565957	-0.236831	-0.124262	-0.141072	-0.0986953	-0.459657	-0.4626	-0.688286	-0.776578	-0.049392	-0.631737	-0.410208	0	0	0	0	0	0
Synpcc7942_0151	637798557	psfR	response regulator receiver modulated diguanylate cyclase	chromosome	+	152527	154917	0	0.101644	46.5381	0		0.293377	0.193705	0.201587	0.21898	0.387384	0.386679	0.305235	0.242656	0.499849	0.523916	0.458747	0.224325	0.270206	0.287626	0.00208033	-0.596816	-0.539275	-0.419877	0.403088	0.400463	0.0592474	-0.271761	0.770817	0.83866	0.647024	-0.385084	-0.116616	-0.0264818	0	0	0	0	0	0
Synpcc7942_0152	637798558	mraY	phospho-N-acetylmuramoyl-pentapeptide- transferase	chromosome	-	154914	156011	0	0.107209	18.3979	0		1.2386	2.22319	2.33723	2.15076	1.34602	1.28127	1.34234	1.29646	0.751277	0.691417	0.923341	0.91698	1.62815	1.3414	-0.016019	0.827906	0.900071	0.780116	0.103972	0.0328446	0.100017	0.0498536	-0.737312	-0.8571	-0.439793	-0.449766	0.378509	0.099007	0	0	0	0	1	26
Synpcc7942_0153	637798559		hypothetical protein	chromosome	-	156026	156307	1	0.134125	210.18	0		2.10927	3.89011	4.06535	3.73895	2.64889	2.35622	2.13141	2.2448	1.93364	1.73214	1.75831	1.5321	3.1086	2.65547	-0.174062	0.709007	0.772577	0.65183	0.154583	-0.0143271	-0.158995	-0.0842155	-0.299482	-0.458251	-0.436616	-0.635288	0.385462	0.158166	0	0	0	0	0	0
Synpcc7942_0154	637798560		hypothetical protein	chromosome	+	156340	156957	0	0.0631585	79.166	0		0.199214	0.232841	0.261541	0.22982	0.229103	0.23514	0.219451	0.162287	0.177972	0.125157	0.207302	0.156346	0.158657	0.170012	-0.146544	0.0784818	0.246176	0.0596435	0.0551334	0.0926585	-0.00696488	-0.442316	-0.309209	-0.817126	-0.0891298	-0.496119	-0.474951	-0.375227	0	0	0	0	0	0
Synpcc7942_0155	637798561		hypothetical protein	chromosome	+	156954	157184	0	0.0718784	249.899	0		0.0650709	0.10717	0.094272	0.0990002	0.126812	0.113963	0.107369	0.0630247	0.0704141	0.0691507	0.0958567	0.0855566	0.0840513	0.0930348	-0.617147	0.102668	-0.0823301	-0.0117274	0.34546	0.191335	0.105344	-0.663243	-0.503294	-0.529416	-0.0582802	-0.222281	-0.24789	-0.101389	0	0	0	0	0	0
Synpcc7942_0156	637798562		phosphoglucomutase	chromosome	-	157210	158841	1	0.411997	175.931	1	Dawn	0.642097	0.469615	0.45398	0.564941	0.759862	0.675558	0.511862	0.74571	0.932599	0.795909	0.55144	0.589691	0.470227	0.582049	0.0280041	-0.423308	-0.472156	-0.156686	0.27095	0.101293	-0.299031	0.243829	0.566471	0.337816	-0.191582	-0.0948269	-0.421428	-0.113645	0	0	0	0	0	0
Synpcc7942_0157	637798563		hypothetical protein	chromosome	-	159042	159560	0	0.657112	333.548	0		4.08229	1.52938	1.18045	1.53411	5.34321	4.87351	2.4972	2.19009	6.42926	6.20421	4.9948	2.32394	1.73583	1.71155	0.667219	-0.749216	-1.12282	-0.744756	1.05555	0.922801	-0.0418485	-0.23117	1.32249	1.27109	0.958266	-0.145585	-0.566535	-0.586853	0	0	1	16	1	27
Synpcc7942_0158	637798564	moeB	hypothetical protein	chromosome	-	159996	161171	0	0.209578	76.5749	0		2.05726	4.02517	4.27348	4.38313	2.4696	2.61643	2.46308	3.26782	2.11356	1.93381	1.86743	2.18475	3.54801	3.41412	-0.0668245	0.901502	0.987863	1.02441	0.196729	0.280051	0.192915	0.600781	-0.0278713	-0.156098	-0.206491	0.0199193	0.719464	0.663966	0	0	0	0	1	28
Synpcc7942_0159	637798565		Mov34/MPN/PAD-1	chromosome	-	161198	161632	0	0.0634148	216.265	0		0.134929	0.0758812	0.0711988	0.0940772	0.0817719	0.09925	0.117672	0.0917279	0.119299	0.133357	0.141802	0.114846	0.0870365	0.115278	0.645913	-0.184469	-0.276358	0.125633	-0.076607	0.202856	0.448494	0.0891487	0.468303	0.629007	0.717593	0.413414	0.0134098	0.418829	0	0	0	0	0	0
Synpcc7942_0160	637798566	era	GTP-binding protein Era	chromosome	+	161726	162661	1	0.242512	48.3575	0		0.287535	0.290388	0.231624	0.245613	0.251863	0.409507	0.478093	0.18953	0.216809	0.292817	0.50271	0.351329	0.445465	0.417371	-0.00360709	0.0106327	-0.31556	-0.230958	-0.19471	0.506542	0.729944	-0.604918	-0.41092	0.0226531	0.802379	0.285475	0.627965	0.533984	0	0	0	0	0	0
Synpcc7942_0161	637798567		hypothetical protein	chromosome	+	162764	163306	1	0.326975	104.405	1	Dawn	0.630097	0.806401	0.92419	0.991945	0.786094	0.750494	0.70458	0.737816	0.740321	0.504746	0.406332	0.445863	0.65524	0.797724	-0.235845	0.120079	0.31677	0.418842	0.0832828	0.0164213	-0.0746548	-0.00815895	-0.00326811	-0.555862	-0.868761	-0.734818	-0.179396	0.10447	0	0	0	0	0	0
Synpcc7942_0162	637798568		hypothetical protein	chromosome	+	163405	163755	0	0.167439	306.124	0		0.63217	0.543673	0.710039	0.577813	0.697466	0.807014	0.607389	0.643674	1.26224	1.1042	1.06344	0.771086	0.730168	0.56738	0.170497	-0.0470765	0.338082	0.0407868	0.312306	0.522778	0.112804	0.196513	1.1681	0.975116	0.920845	0.457075	0.378413	0.0144988	0	0	0	0	0	0
Synpcc7942_0163	637798569		hypothetical protein	chromosome	+	163761	164510	0	0.108579	298.434	0		0.419924	0.336272	0.345848	0.28807	0.39895	0.449288	0.383467	0.400454	0.781785	0.655767	0.739151	0.550452	0.437504	0.330484	0.413959	0.0934592	0.133969	-0.129751	0.340039	0.51147	0.282931	0.345467	1.3106	1.05701	1.2297	0.804446	0.473125	0.0684125	0	0	0	0	0	0
Synpcc7942_0164	637798570		Iojap-related protein	chromosome	+	164548	164967	1	0.14008	330.235	0		1.51677	1.63322	1.54281	1.34692	1.56598	1.79515	1.84069	1.14005	1.86815	1.95169	2.17475	1.33456	1.45041	1.59534	0.216757	0.323476	0.241317	0.0454222	0.262816	0.459855	0.496	-0.195154	0.517367	0.580475	0.736602	0.0321216	0.152214	0.289618	0	0	0	0	0	0
Synpcc7942_0165	637798571	ycf36	hypothetical protein	chromosome	+	164986	165486	1	0.185262	344.643	1	Dusk	0.901511	1.23431	1.15525	0.977803	0.90768	1.02149	1.01012	0.636075	0.658604	0.704801	0.932881	0.815264	1.05896	0.954204	0.0220444	0.475334	0.379831	0.139243	0.0318828	0.202304	0.186155	-0.481103	-0.43089	-0.333085	0.0713917	-0.123034	0.254272	0.103997	0	0	0	0	1	30
Synpcc7942_0166	637798572		hypothetical protein	chromosome	+	165483	166436	0	0.136453	144.349	0		1.00314	1.31101	1.327	1.15695	0.879509	1.12145	1.09413	0.840468	0.723406	0.734975	0.910186	1.04849	1.15905	1.04326	0.0704852	0.45664	0.474129	0.276289	-0.119271	0.231329	0.195748	-0.184775	-0.401164	-0.378274	-0.069807	0.134267	0.2789	0.127064	0	0	0	0	0	0
Synpcc7942_0167	637798573		hypothetical protein	chromosome	-	166695	166925	0	0.460289	116.444	0		0.793245	0.513522	0.521638	0.614844	0.942032	0.67922	0.67848	0.889348	0.989151	0.731541	0.540906	0.777139	0.504308	0.585086	-0.102613	-0.729954	-0.70733	-0.470161	0.145395	-0.326502	-0.328075	0.062368	0.21581	-0.219441	-0.655003	-0.132208	-0.756076	-0.541732	0	0	0	0	0	0
Synpcc7942_0168	637798574		hypothetical protein	chromosome	+	167065	167748	1	0.322891	221.087	1	Dusk	1.66597	0.951583	0.873762	0.945838	1.46835	1.57337	1.21434	1.68464	2.46522	2.44843	2.39789	1.67746	1.41432	1.18627	0.0744212	-0.733538	-0.856627	-0.742273	-0.107744	-0.0080809	-0.381764	0.0905019	0.639775	0.629919	0.599826	0.0843423	-0.161831	-0.415511	0	0	0	0	0	0
Synpcc7942_0169	637798575	glnN	glutamate-ammonia ligase, glutamine synthetase type III	chromosome	+	168176	170347	0	0.221617	46.9303	0		0.720064	0.851755	0.631203	0.545293	0.512181	1.1335	1.1181	0.750477	0.555954	0.633642	0.987066	2.58343	1.33551	0.904805	-0.754291	-0.511977	-0.944313	-1.15539	-1.24576	-0.0997067	-0.119444	-0.69461	-1.12745	-0.938749	-0.29927	1.0888	0.136902	-0.42481	0	0	0	0	0	0
Synpcc7942_0170	637798576		hypothetical protein	chromosome	+	170498	170752	0	0.138985	26.1078	0		0.230172	0.347882	0.297949	0.316249	0.366511	0.40056	0.260749	0.30661	0.549783	0.346182	0.477592	0.256194	0.315983	0.27531	-0.414232	0.18165	-0.0418822	0.0441145	0.256912	0.385072	-0.234285	-0.0005408	0.841915	0.174582	0.638832	-0.259708	0.0429018	-0.155889	0	0	0	0	0	0
Synpcc7942_0171	637798577	cysM	cysteine synthase A	chromosome	+	170797	171915	0	0.164964	156.425	0		0.47143	0.560463	0.755086	0.811028	0.589636	0.471459	0.470644	0.574387	0.503219	0.380919	0.307422	0.373351	0.408184	0.427217	0.140962	0.390538	0.82056	0.923671	0.463744	0.141051	0.138557	0.425944	0.235105	-0.166596	-0.475858	-0.195548	-0.0668615	-0.00110995	0	0	0	0	0	0
Synpcc7942_0172	637798578		hypothetical protein	chromosome	+	171912	172205	0	0.101537	308.973	0		0.335978	0.452601	0.635363	0.677556	0.483956	0.354588	0.416421	0.486024	0.397816	0.191594	0.139873	0.306238	0.340107	0.341128	-0.133092	0.29678	0.786122	0.87888	0.393415	-0.0553169	0.176584	0.399566	0.110641	-0.943406	-1.39735	-0.266806	-0.11547	-0.111148	0	0	0	0	0	0
Synpcc7942_0173	637798579	cysQ, amtA	3 -Phosphoadenosine 5 -phosphosulfate (PAPS) 3 -phosphatase-like	chromosome	-	172202	173071	1	0.165602	105.448	0		0.0641734	0.0978156	0.0834361	0.106529	0.0649365	0.0653598	0.0649018	0.119618	0.0569788	0.0676447	0.0363594	0.0984392	0.0580244	0.065324	-0.595653	0.0124369	-0.216955	0.135541	-0.578598	-0.569224	-0.579368	0.302736	-0.767202	-0.519651	-1.4153	0.0216059	-0.740969	-0.570014	0	0	0	0	0	0
Synpcc7942_0174	637798580		hypothetical protein	chromosome	+	173111	173989	0	0.105968	106.232	0		0.0903886	0.0856658	0.105705	0.104069	0.0975976	0.0754723	0.0888516	0.0993768	0.107504	0.0707779	0.0701749	0.0818173	0.0717878	0.0744349	-0.21245	-0.289872	0.013378	-0.00912868	-0.101745	-0.472643	-0.237193	-0.0756814	0.0377244	-0.565291	-0.577634	-0.356184	-0.544851	-0.492611	0	0	0	0	0	0
Synpcc7942_0175	637798581		hypothetical protein	chromosome	+	173986	174198	0	0.106421	98.4178	0		0.178105	0.152547	0.159038	0.183653	0.147352	0.113706	0.10901	0.159485	0.14182	0.118412	0.0853935	0.0979415	0.0865965	0.123318	0.0338151	-0.189656	-0.129541	0.0780719	-0.239646	-0.6136	-0.674454	-0.125491	-0.29485	-0.555094	-1.02671	-0.828919	-1.00653	-0.496523	0	0	0	0	0	0
Synpcc7942_0176	637798582		hypothetical protein	chromosome	+	174311	174712	0	0.070008	31.1021	0		0.600044	0.53115	0.288913	0.311388	0.548257	0.673198	0.585465	0.430564	0.803457	0.939021	0.881309	0.579032	0.423816	0.484707	0.215866	0.0399172	-0.838568	-0.73049	0.085648	0.381828	0.18038	-0.262976	0.637017	0.861953	0.770445	0.16444	-0.285766	-0.0920912	0	0	0	0	0	0
Synpcc7942_0177	637798583		ABC-type uncharacterized transport system permease component-like	chromosome	-	174709	175497	0	0.127633	71.6738	0		0.144245	0.171265	0.154563	0.138059	0.230721	0.224217	0.166539	0.170853	0.247387	0.26639	0.250576	0.153772	0.199326	0.172509	-0.274712	-0.0270027	-0.175034	-0.33794	0.402917	0.361665	-0.0673737	-0.0304768	0.503537	0.61031	0.522018	-0.182434	0.191901	-0.0165545	0	0	0	0	0	0
Synpcc7942_0178	637798584		ATPase	chromosome	-	175494	176471	0	0.143833	134.245	0		0.240789	0.248385	0.215245	0.216605	0.32092	0.276713	0.219608	0.268503	0.398365	0.320645	0.366299	0.257654	0.221356	0.262229	-0.0667512	-0.0219422	-0.228542	-0.219454	0.347693	0.133873	-0.19959	0.0904172	0.659572	0.346458	0.538502	0.030914	-0.188149	0.056306	0	0	0	0	0	0
Synpcc7942_0179	637798585		Secretion chaperone CsaA	chromosome	+	176742	177095	0	0.229143	187.613	0		0.0647033	0.0845022	0.0806549	0.0884025	0.072899	0.0505687	0.0417395	0.100531	0.0831444	0.109247	0.042445	0.116311	0.0493623	0.0701528	-0.532781	-0.14763	-0.214857	-0.0825317	-0.360721	-0.888375	-1.16521	0.102947	-0.171001	0.222902	-1.14102	0.313296	-0.923209	-0.416118	0	0	0	0	0	0
Synpcc7942_0180	637798586		hypothetical protein	chromosome	-	177550	178422	1	0.236834	28.324	1	Dusk	0.548519	0.399961	0.355879	0.358471	1.17922	0.999945	0.70784	0.437916	1.18534	2.21786	1.33705	0.452774	0.62273	0.719924	0.959696	0.504015	0.335544	0.346011	2.06392	1.82601	1.32758	0.63481	2.07139	2.97525	2.24514	0.682945	1.14276	1.352	0	0	0	0	0	0
Synpcc7942_0181	637798587		ATPase	chromosome	-	178419	179792	0	0.209314	94.7664	0		0.827783	0.505995	0.47125	0.473482	1.733	1.51668	1.02622	0.591405	2.03955	3.65783	2.19518	0.555381	0.74929	0.882165	0.95093	0.240801	0.13817	0.144987	2.01688	1.82453	1.26095	0.465825	2.25186	3.09459	2.35794	0.375154	0.807202	1.04273	1	12	1	18	1	33
Synpcc7942_0182	637798588		hypothetical protein	chromosome	-	180156	180881	0	0.0664399	272.06	0		0.0404228	0.0461764	0.0333285	0.0381317	0.044192	0.046414	0.0356165	0.0245096	0.0362739	0.0289506	0.0392141	0.0559574	0.0454641	0.0374959	0.0859441	0.277929	-0.192471	0.00176344	0.214561	0.285335	-0.0966785	-0.63588	-0.0702924	-0.395631	0.0421463	0.555104	0.255501	-0.0224952	0	0	0	0	0	0
Synpcc7942_0183	637798589		hypothetical protein	chromosome	+	181078	181467	0	0.0856331	4.65878	0		0.16518	0.122988	0.141456	0.120363	0.203875	0.191703	0.198905	0.110607	0.212506	0.21126	0.210885	0.128097	0.136907	0.148172	-0.358146	-0.783671	-0.581828	-0.814788	-0.0545027	-0.143309	-0.0901073	-0.936737	0.00532049	-0.00316843	-0.00573027	-0.724946	-0.628993	-0.514913	0	0	0	0	0	0
Synpcc7942_0184	637798590	pit	putative phosphate permease	chromosome	+	181464	182555	0	0.0629157	293.362	0		0.131095	0.136023	0.166185	0.127307	0.162231	0.149467	0.183151	0.132334	0.20286	0.1509	0.186117	0.127192	0.158243	0.152195	-0.363857	-0.310618	-0.0216851	-0.406155	-0.0564218	-0.174646	0.118561	-0.35029	0.266011	-0.160882	0.141741	-0.407461	-0.0923331	-0.148547	0	0	0	0	0	0
Synpcc7942_0185	637798591	ggt	gamma-glutamyltransferase. Threonine peptidase. MEROPS family T03	chromosome	+	182620	184146	0	0.0611511	27.4881	0		0.126562	0.100652	0.118209	0.118235	0.121954	0.116542	0.114043	0.149369	0.148621	0.128284	0.116525	0.107856	0.106488	0.109777	-0.0537122	-0.38419	-0.152215	-0.1519	-0.107225	-0.172705	-0.203986	0.18532	0.178082	-0.0342207	-0.172917	-0.284451	-0.302864	-0.258978	0	0	0	0	0	0
Synpcc7942_0186	637798592		possible DNA polymerase	chromosome	+	184160	184411	0	0.1378	321.194	0		0.0852119	0.0613994	0.0499292	0.0788094	0.107941	0.100287	0.0670103	0.094148	0.0860617	0.0867416	0.128665	0.0871409	0.0558591	0.0795965	-0.0578059	-0.530636	-0.828976	-0.170493	0.283312	0.177209	-0.404477	0.0860693	-0.0434889	-0.0321359	0.536685	-0.0255099	-0.667069	-0.156156	0	0	0	0	0	0
Synpcc7942_0187	637798593		hypothetical protein	chromosome	-	184418	185461	1	0.131759	217.052	0		0.218711	0.185257	0.186341	0.201182	0.250527	0.231987	0.201175	0.238616	0.27154	0.267358	0.274211	0.262399	0.19202	0.207225	-0.193237	-0.432734	-0.424317	-0.313757	0.00270338	-0.108217	-0.313806	-0.0675667	0.118903	0.0965104	0.133025	0.0695046	-0.381006	-0.27106	0	0	0	0	0	0
Synpcc7942_0188	637798594		diguanylate cyclase/phosphodiesterase (GGDEF &amp; EAL domains) with PAS/PAC sensor(s)	chromosome	+	185682	187418	0	0.123099	236.44	0		0.0692291	0.0685892	0.0677	0.0575139	0.0313197	0.042436	0.0388868	0.027628	0.0334437	0.043077	0.0478042	0.0360303	0.0268267	0.0313437	-0.20306	-0.216459	-0.235283	-0.470528	-1.34737	-0.909151	-1.03516	-1.52831	-1.25271	-0.887523	-0.737302	-1.14523	-1.57077	-1.34626	0	0	0	0	0	0
Synpcc7942_0189	637798595	guaA	bifunctional GMP synthase/glutamine amidotransferase protein	chromosome	-	187531	189258	0	0.0877565	226.08	0		2.22107	3.07781	3.38919	3.18705	2.3935	2.32724	2.3362	2.262	2.22147	2.07408	2.14683	1.91479	2.59468	2.76653	-0.117432	0.353218	0.492251	0.403535	-0.00956498	-0.0500656	-0.0445243	-0.0910874	-0.117175	-0.216214	-0.166479	-0.331505	0.106867	0.199389	0	0	0	0	1	34
Synpcc7942_0190	637798596	cbiD	cobalt-precorrin-6A synthase	chromosome	-	189273	190397	1	0.132744	265.23	0		0.0598074	0.0761025	0.109261	0.10378	0.0743963	0.0645851	0.064732	0.092984	0.0702264	0.0934141	0.0569389	0.0688065	0.052207	0.060281	-0.224548	0.123072	0.644828	0.570585	0.0903598	-0.11367	-0.110393	0.41211	0.00714074	0.418768	-0.295458	-0.0223274	-0.420628	-0.213168	0	0	0	0	0	0
Synpcc7942_0191	637798597		Serine--glyoxylate transaminase	chromosome	+	190472	191620	0	0.284758	161.31	0		0.714534	1.22856	1.79336	1.67451	0.913565	0.860561	0.906149	1.07654	1.07858	0.826093	0.80183	0.714783	1.08697	1.10521	-0.621735	0.160165	0.705857	0.606928	-0.26723	-0.35346	-0.27899	-0.0304005	-0.0276755	-0.412434	-0.455441	-0.621231	-0.0165022	0.00750633	0	0	0	0	0	0
Synpcc7942_0192	637798598	ycf60	conserved hypothetical protein YCF60	chromosome	-	191710	192186	0	0.0980724	202.235	0		1.15995	0.85851	0.688864	0.648499	1.56308	1.5122	1.2468	1.00721	2.27495	2.8271	2.29951	1.10488	0.914824	0.994205	0.151969	-0.282191	-0.599807	-0.686921	0.582297	0.534548	0.256136	-0.0517396	1.12374	1.43722	1.13923	0.0817937	-0.190532	-0.0704829	0	0	0	0	1	35
Synpcc7942_0193	637798599		hypothetical protein	chromosome	-	192247	192471	0	0.210037	199.637	0		0.607618	0.160457	0.176365	0.216654	1.30194	1.14194	0.537088	0.378646	3.58361	2.37645	2.43923	0.492869	0.347328	0.295038	0.100688	-1.82029	-1.68391	-1.38708	1.20011	1.01094	-0.0773173	-0.581626	2.66087	2.06826	2.10588	-0.201271	-0.706177	-0.941577	0	0	0	0	0	0
Synpcc7942_0194	637798600	polA	DNA polymerase I	chromosome	-	192655	195516	0	0.0951776	109.828	0		0.23084	0.292658	0.314334	0.323408	0.263195	0.231061	0.222367	0.239838	0.286061	0.210035	0.183198	0.154607	0.225399	0.249302	-0.122082	0.220236	0.323323	0.36438	0.0671528	-0.120706	-0.176036	-0.0669184	0.187343	-0.258349	-0.455575	-0.700375	-0.156498	-0.0110822	0	0	0	0	0	0
Synpcc7942_0195	637798601		hypothetical protein	chromosome	+	195630	196058	0	0.259727	329.745	0		0.567285	0.111807	0.139877	0.186577	0.866548	0.913107	0.71837	0.265206	1.3144	1.91074	2.42591	0.365992	0.306625	0.42303	0.286647	-2.05642	-1.73327	-1.31765	0.897855	0.973358	0.6273	-0.81031	1.4989	2.03864	2.38303	-0.345614	-0.600948	-0.136665	0	0	0	0	0	0
Synpcc7942_0196	637798602		Beta-carotene 15,15 -dioxygenase	chromosome	-	196094	197575	0	0.108503	283.914	0		0.136684	1.11956	0.65275	0.346796	0.0512981	0.072475	0.103975	0.180465	0.0742152	0.0748825	0.0843112	0.345988	0.295758	0.195285	0.0919248	3.12594	2.34761	1.43517	-1.32194	-0.823365	-0.302689	0.492797	-0.789134	-0.776218	-0.605123	1.4318	1.2055	0.606663	0	0	0	0	0	0
Synpcc7942_0197	637798603		folate/biopterin transporter	chromosome	-	197572	198933	0	0.103903	299.317	0		0.319526	1.96873	1.22155	0.773702	0.155163	0.220345	0.314997	0.45726	0.226907	0.219749	0.265928	0.7997	0.663945	0.665174	0.00853516	2.6318	1.94324	1.28438	-1.03361	-0.527631	-0.0120612	0.525619	-0.485295	-0.531538	-0.256359	1.33206	1.06367	1.06633	0	0	1	19	0	0
Synpcc7942_0198	637798604	ndbC	type 2 NADH dehydrogenase	chromosome	-	198993	200429	1	0.511264	347.579	1	Dusk	0.674437	0.598663	0.306455	0.326246	0.452843	0.66464	0.509345	0.485928	0.599917	1.03263	0.966371	0.670476	0.651924	0.560665	0.96765	0.795711	-0.170359	-0.0800734	0.392977	0.946539	0.562609	0.494708	0.798728	1.58221	1.48654	0.959151	0.918669	0.701105	0	0	0	0	0	0
Synpcc7942_0199	637798605		hypothetical protein	chromosome	-	200426	201352	1	0.353413	339.955	1	Dusk	0.433946	0.428405	0.243792	0.204501	0.395005	0.469144	0.367744	0.399028	0.503837	0.808984	0.744751	0.488582	0.448743	0.441	0.788147	0.769604	-0.0437199	-0.297262	0.6525	0.900661	0.54933	0.667119	1.00359	1.68674	1.56739	0.959229	0.836518	0.81141	0	0	0	0	0	0
Synpcc7942_0200	637798606		hypothetical protein	chromosome	-	201352	201888	1	0.59787	328.64	0		0.402543	0.340955	0.223491	0.200606	0.361072	0.431404	0.411749	0.419721	0.608682	0.864211	0.892431	0.476403	0.438393	0.428665	0.57201	0.33245	-0.276917	-0.43277	0.415153	0.671908	0.604631	0.632299	1.16856	1.67425	1.72061	0.81505	0.695093	0.662717	0	0	0	0	0	0
Synpcc7942_0201	637798607	ccoO	hypothetical protein	chromosome	-	201889	202641	1	0.425666	342.534	1	Dusk	0.63308	0.397946	0.253211	0.285324	0.632628	0.632091	0.482154	0.517012	0.796157	1.27505	0.986159	0.600023	0.533098	0.523878	1.02283	0.353011	-0.29922	-0.126964	1.02179	1.02057	0.629931	0.730636	1.35349	2.03291	1.66226	0.945454	0.774837	0.749667	0	0	0	0	0	0
Synpcc7942_0202	637798608	ccoN	Cbb3-type cytochrome oxidase subunit 1-like	chromosome	-	202638	204089	0	0.473983	352.212	0		0.869584	0.537777	0.394276	0.428152	0.967422	1.05012	0.789742	0.880117	1.49737	1.89511	1.58272	0.84768	0.814008	0.867009	0.821429	0.128113	-0.31969	-0.200772	0.975249	1.09358	0.682486	0.8388	1.60546	1.94531	1.68544	0.784623	0.726147	0.817151	1	13	0	0	0	0
Synpcc7942_0203	637798609	ribD	5-amino-6-(5-phosphoribosylamino)uracil reductase / diaminohydroxyphosphoribosylaminopyrimidine deaminase	chromosome	-	204483	205589	0	0.158728	316.535	0		0.132552	0.117408	0.132458	0.113079	0.147432	0.147442	0.167798	0.103751	0.116148	0.126071	0.172165	0.111087	0.138559	0.145388	0.0789394	-0.0960912	0.0779144	-0.150292	0.232431	0.232527	0.419111	-0.274497	-0.111649	0.00661969	0.456178	-0.175927	0.142887	0.212287	0	0	0	0	0	0
Synpcc7942_0204	637798610		hypothetical protein	chromosome	-	205582	206046	0	0.0920403	86.8404	0		0.264762	0.305016	0.233119	0.243315	0.395981	0.418943	0.366557	0.265547	0.48139	0.439347	0.542518	0.3046	0.267229	0.343035	-0.220423	-0.0162303	-0.404052	-0.342289	0.360313	0.441637	0.248922	-0.21615	0.642091	0.510246	0.814554	-0.0182018	-0.207041	0.153239	0	0	0	0	0	0
Synpcc7942_0205	637798611		nicotinamide-nucleotide adenylyltransferase	chromosome	+	206198	207214	1	0.101136	3.20513	0		0.134429	0.137433	0.14418	0.132554	0.104928	0.123215	0.138024	0.099147	0.135566	0.195922	0.229392	0.119298	0.140321	0.138531	0.494316	0.526206	0.595343	0.474052	0.136882	0.368648	0.53239	0.0551161	0.506474	1.03775	1.26529	0.322049	0.556206	0.537681	0	0	0	0	0	0
Synpcc7942_0206	637798612		hypothetical protein	chromosome	+	207362	208750	0	0.0697209	192.421	0		0.0463788	0.063866	0.0665447	0.0606583	0.0241025	0.0272921	0.0398914	0.0267859	0.0195172	0.0345007	0.0250511	0.039524	0.0352952	0.0367897	0.254972	0.716553	0.775829	0.642212	-0.689312	-0.510013	0.0375842	-0.537022	-0.993745	-0.17187	-0.63362	0.0242339	-0.139023	-0.0791912	0	0	0	0	0	0
Synpcc7942_0207	637798613		hypothetical protein	chromosome	+	208813	208983	0	0.12507	199.131	0		0.117204	0.120644	0.12735	0.0844656	0.122362	0.178582	0.117268	0.110365	0.154005	0.22616	0.189611	0.144471	0.15896	0.122886	-0.177698	-0.135956	-0.0579191	-0.650281	-0.115556	0.429871	-0.176906	-0.264436	0.216262	0.77063	0.516328	0.124058	0.261948	-0.109399	0	0	0	0	0	0
Synpcc7942_0208	637798614		TPR repeat	chromosome	+	209056	211827	0	0.116805	38.6523	0		0.105353	0.0967505	0.0837973	0.0920528	0.0855478	0.100667	0.0772903	0.0927863	0.10618	0.125563	0.100707	0.102193	0.0714436	0.075117	0.0989965	-0.0238915	-0.231257	-0.0956989	-0.201431	0.0333628	-0.347873	-0.0842492	0.110279	0.352179	0.0339248	0.055057	-0.461357	-0.389022	0	0	0	0	0	0
Synpcc7942_0209	637798615	maf	Maf-like protein	chromosome	-	211824	212450	0	0.104466	135.985	0		0.142699	0.147241	0.14433	0.168931	0.145723	0.141074	0.15402	0.158237	0.181594	0.132746	0.127388	0.114701	0.108382	0.159955	-0.103805	-0.0586038	-0.0874135	0.139652	-0.0735595	-0.120329	0.00633035	0.0453071	0.243936	-0.208112	-0.267548	-0.418908	-0.50066	0.0608791	0	0	0	0	0	0
Synpcc7942_0210	637798616		hypothetical protein	chromosome	+	212496	212897	0	0.0819198	118.1	0		0.0498553	0.0410551	0.0601902	0.0763499	0.0503147	0.0602473	0.0603843	0.0496289	0.0289013	0.0585581	0.047213	0.0355067	0.0410534	0.0320762	-0.46282	-0.743005	-0.191037	0.15206	-0.449587	-0.18967	-0.186393	-0.469387	-1.24943	-0.230699	-0.541383	-0.952476	-0.743065	-1.09906	0	0	0	0	0	0
Synpcc7942_0211	637798617	cobQ	cobyric acid synthase	chromosome	+	212909	214384	0	0.0810304	179.482	0		0.107173	0.103431	0.118359	0.103972	0.0987604	0.110581	0.10833	0.1085	0.0965571	0.125312	0.0905476	0.101169	0.0858322	0.0740959	0.324982	0.273703	0.468216	0.281243	0.207045	0.370147	0.340473	0.342733	0.174494	0.55056	0.0817883	0.241801	0.00463209	-0.207494	0	0	0	0	0	0
Synpcc7942_0212	637798618	aroC	chorismate synthase	chromosome	+	214471	215559	0	0.0612776	165.858	0		0.353618	0.39688	0.459044	0.431054	0.392605	0.348105	0.313038	0.357989	0.405415	0.372112	0.387784	0.340786	0.30978	0.354785	0.0157566	0.18227	0.3922	0.301434	0.166644	-0.00690964	-0.160096	0.0334802	0.212965	0.0893044	0.148819	-0.0375678	-0.17519	0.0205128	0	0	0	0	0	0
Synpcc7942_0213	637798619		hypothetical protein	chromosome	-	215643	216188	0	0.270616	357.551	0		0.149449	0.0925714	0.109017	0.0936895	0.112412	0.204432	0.212629	0.0543161	0.120581	0.207872	0.260709	0.169925	0.120016	0.165316	-0.0584836	-0.749494	-0.513578	-0.732173	-0.469336	0.39349	0.450206	-1.51868	-0.36813	0.417563	0.744309	0.126764	-0.374912	0.0870914	0	0	0	0	0	0
Synpcc7942_0214	637798620		hypothetical protein	chromosome	+	216509	217432	0	0.149362	185.318	0		0.268805	0.249505	0.26239	0.251408	0.319294	0.321376	0.253573	0.240427	0.284171	0.319367	0.369733	0.253105	0.267388	0.275486	-0.244948	-0.35244	-0.279792	-0.341474	0.0033801	0.0127541	-0.329105	-0.405906	-0.164746	0.00370786	0.214976	-0.331772	-0.252572	-0.209526	0	0	0	0	0	0
Synpcc7942_0215	637798621		hypothetical protein	chromosome	-	217424	217813	1	0.3954	321.038	1	Dusk	3.34031	0.260522	0.446704	0.666628	7.86527	6.68532	3.47339	1.1199	7.40197	6.79911	7.65877	0.677085	1.05418	0.689428	0.31736	-3.36314	-2.58523	-2.00767	1.55288	1.31838	0.373724	-1.25925	1.46529	1.34272	1.51449	-1.98521	-1.3465	-1.95915	0	0	1	20	1	39
Synpcc7942_0216	637798622		putative zinc-binding oxidoreductase	chromosome	-	217948	218964	0	0.119801	131.956	0		0.193549	0.311887	0.286456	0.244988	0.164594	0.184304	0.208073	0.142623	0.147752	0.157068	0.176515	0.14197	0.198549	0.159193	0.0152611	0.703585	0.580874	0.35527	-0.21853	-0.0553503	0.119651	-0.42523	-0.374261	-0.28605	-0.117649	-0.431849	0.0520594	-0.266663	0	0	0	0	0	0
Synpcc7942_0217	637798623		phosphatase-like	chromosome	+	219113	219871	0	0.114219	206.601	0		0.510194	2.79282	1.58696	1.06567	0.244435	0.256665	0.415073	0.53708	0.326558	0.35778	0.264648	0.894004	0.815389	0.910483	0.171024	2.62363	1.80817	1.23367	-0.890572	-0.820136	-0.126654	0.245116	-0.47268	-0.34095	-0.775947	0.980261	0.847467	1.00661	0	0	1	21	0	0
Synpcc7942_0218	637798624		hypothetical protein	chromosome	-	220024	220191	0	0.259054	194.509	0		0.937331	0.475845	0.54154	0.565995	0.676708	0.933927	0.892075	0.718948	0.903648	0.860744	0.781403	0.715645	0.540292	0.648143	0.298311	-0.679755	-0.493179	-0.429459	-0.171714	0.293063	0.226918	-0.0843596	0.245514	0.175337	0.03582	-0.0910031	-0.496508	-0.233936	0	0	0	0	0	0
Synpcc7942_0219	637798625		hypothetical protein	chromosome	-	220316	220636	0	0.0734583	220.171	0		0.372384	0.290815	0.327142	0.284973	0.228143	0.298519	0.378107	0.30908	0.316096	0.31429	0.391713	0.429271	0.308476	0.373434	0.123378	-0.23331	-0.0634935	-0.262589	-0.583474	-0.195588	0.145384	-0.14543	-0.11305	-0.121314	0.196386	0.328476	-0.148254	0.12744	0	0	0	0	0	0
Synpcc7942_0220	637798626	minD	probable cell division inhibitor MinD	chromosome	-	220639	221397	1	0.097966	110.849	0		0.358361	0.32481	0.34621	0.322714	0.259137	0.342682	0.307307	0.36942	0.302066	0.346703	0.388636	0.448449	0.303133	0.342925	0.126834	-0.0149848	0.0770684	-0.0243267	-0.340863	0.0622892	-0.094899	0.170681	-0.119715	0.0791186	0.24384	0.450362	-0.114631	0.063314	0	0	0	0	0	0
Synpcc7942_0221	637798627	glk	glucokinase	chromosome	+	221498	222535	1	0.116639	124.902	0		0.244799	0.25589	0.299309	0.265542	0.274148	0.232313	0.246568	0.242074	0.275348	0.211397	0.227798	0.222134	0.233813	0.261334	-0.282973	-0.21905	0.00706261	-0.165635	-0.119616	-0.358501	-0.272587	-0.299128	-0.113318	-0.494621	-0.386817	-0.423144	-0.349217	-0.188678	0	0	0	0	0	0
Synpcc7942_0222	637798628		hypothetical protein	chromosome	+	222532	223398	0	0.100053	132.334	0		0.102372	0.16359	0.200381	0.186029	0.136758	0.151819	0.14973	0.136202	0.117032	0.0853333	0.103071	0.125374	0.11925	0.148727	-0.50384	0.172421	0.465085	0.357863	-0.0860385	0.0646914	0.0446981	-0.0919147	-0.31076	-0.766483	-0.494028	-0.211421	-0.28368	0.0350023	0	0	0	0	0	0
Synpcc7942_0223	637798629		hypothetical protein	chromosome	-	223395	223805	1	0.162969	229.12	1	Dusk	1.86869	1.67652	1.82033	1.75274	2.05167	2.16497	1.8887	2.02565	2.30671	1.96374	2.02611	1.61891	1.6605	1.70348	-0.184306	-0.340867	-0.222135	-0.276724	-0.0495358	0.0280098	-0.16894	-0.0679496	0.1195	-0.112729	-0.0676219	-0.391308	-0.354714	-0.317849	0	0	0	0	0	0
Synpcc7942_0224	637798630	psbN	photosystem II reaction center protein N	chromosome	-	223821	223961	0	0.145287	80.0003	0		1.10667	0.830329	0.930106	0.768277	1.12782	0.993273	1.02173	0.822201	1.13162	0.864577	1.14977	0.907193	0.919154	0.972093	-0.170749	-0.585216	-0.421504	-0.697271	-0.143437	-0.326708	-0.285957	-0.599407	-0.13858	-0.526904	-0.115624	-0.457489	-0.438591	-0.357804	0	0	0	0	1	42
Synpcc7942_0225	637798631	psbH	photosystem II reaction center protein PsbH	chromosome	+	224060	224263	0	0.453959	75.7396	0		18.898	19.8136	19.9977	20.0458	18.8384	18.3246	18.0481	15.6821	18.2324	15.9408	12.6841	12.6213	13.0629	15.7882	-0.161382	-0.0931251	-0.0797824	-0.0763132	-0.165937	-0.205834	-0.22777	-0.4305	-0.213108	-0.406887	-0.736594	-0.74375	-0.694144	-0.420769	0	0	0	0	1	42
Synpcc7942_0226	637798632		Sec-independent protein translocase TatA	chromosome	+	224357	224632	0	0.117482	93.6211	0		3.79156	3.44584	3.23146	4.16911	4.95807	4.6432	3.74557	4.35862	4.97287	3.7985	3.03147	2.79268	3.32743	3.92618	0.0190462	-0.118889	-0.21156	0.155995	0.406034	0.311375	0.00143989	0.220128	0.410334	0.0216853	-0.303728	-0.422096	-0.169339	0.0693822	0	0	0	0	0	0
Synpcc7942_0227	637798633	pth	peptidyl-tRNA hydrolase	chromosome	+	224629	225255	1	0.124367	135.591	0		1.48978	1.44609	1.44561	1.64132	2.02788	2.05733	1.65045	1.70277	1.685	1.33953	1.28019	1.19517	1.43374	1.56298	-0.122351	-0.165296	-0.165769	0.0174047	0.32252	0.343324	0.0254081	0.0704336	0.0552953	-0.275724	-0.341092	-0.440242	-0.17767	-0.0531476	0	0	0	0	0	0
Synpcc7942_0228	637798634		hypothetical protein	chromosome	+	225284	225544	0	0.145432	294.747	0		0.562203	0.752883	0.630406	0.670992	0.590574	0.516423	0.600493	0.588794	0.439212	0.499282	0.448433	0.616297	0.624878	0.689836	-0.322605	0.0987313	-0.157413	-0.0674007	-0.251576	-0.445142	-0.227547	-0.255933	-0.678779	-0.49384	-0.648803	-0.19007	-0.170122	-0.0274421	0	0	0	0	0	0
Synpcc7942_0229	637798635		hypothetical protein	chromosome	+	225658	226221	0	0.184227	233.494	0		0.30078	0.301771	0.228236	0.255025	0.306687	0.268856	0.295665	0.622387	0.844595	0.684208	0.757166	0.497399	0.674735	0.292136	0.143295	0.148044	-0.254885	-0.0947719	0.171355	-0.0185801	0.118552	1.1924	1.63285	1.32902	1.4752	0.86899	1.30891	0.101227	0	0	0	0	0	0
Synpcc7942_0230	637798636		hypothetical protein	chromosome	-	226263	227309	0	0.269999	230.288	0		0.246113	0.0364526	0.0545403	0.060929	0.556907	0.436495	0.193039	0.138537	0.61994	0.580559	0.552893	0.0728838	0.0853036	0.0894035	0.196222	-2.55901	-1.97771	-1.8179	1.37433	1.02286	-0.154211	-0.632835	1.52903	1.43434	1.3639	-1.55943	-1.33242	-1.2647	0	0	0	0	0	0
Synpcc7942_0231	637798637		putative acetyltransferase	chromosome	-	227407	227931	0	0.19168	53.3896	0		0.125432	0.22202	0.26547	0.25219	0.138165	0.16046	0.168866	0.185899	0.0752425	0.0688595	0.070797	0.152671	0.213574	0.237425	-0.183532	0.640254	0.898112	0.824075	-0.0440482	0.171777	0.245443	0.384086	-0.920816	-1.04871	-1.00868	0.0999887	0.584301	0.737034	0	0	0	0	0	0
Synpcc7942_0232	637798638	aroA	3-phosphoshikimate 1-carboxyvinyltransferase	chromosome	-	227939	229285	0	0.125891	158.487	0		0.343277	0.551747	0.637336	0.75283	0.497598	0.4198	0.497149	0.551621	0.303612	0.202224	0.227793	0.37129	0.487919	0.584298	-0.163576	0.521058	0.729105	0.969376	0.372033	0.126755	0.37073	0.520728	-0.340719	-0.926995	-0.755224	-0.0504001	0.343693	0.603757	0	0	0	0	0	0
Synpcc7942_0233	637798639		hypothetical protein	chromosome	-	229629	230054	0	0.168696	125.34	0		0.752745	0.973396	0.93378	0.970536	0.820259	0.926953	1.00958	0.699962	0.912739	0.665082	0.764828	0.755181	0.837479	1.01345	-0.226906	0.14396	0.0840147	0.139715	-0.102988	0.0734289	0.196615	-0.331791	0.0511353	-0.405535	-0.203931	-0.222246	-0.0730141	0.202141	0	0	0	0	0	0
Synpcc7942_0234	637798640		hypothetical protein	chromosome	-	230158	231150	0	0.0599722	298.157	0		0.207598	0.156337	0.188601	0.152121	0.192453	0.197242	0.22745	0.20906	0.319806	0.319188	0.339263	0.405798	0.184773	0.164964	-0.253957	-0.663093	-0.392411	-0.702529	-0.363243	-0.32778	-0.122195	-0.243833	0.369451	0.36666	0.454657	0.713013	-0.421993	-0.585595	0	0	0	0	0	0
Synpcc7942_0235	637798641		cyclic nucleotide-binding domain (cNMP-BD) protein	chromosome	+	231162	231677	0	0.250435	269.47	0		0.536835	0.496764	0.474551	0.479354	0.363601	0.399984	0.365099	0.582055	0.399286	0.558855	0.4138	0.600057	0.50421	0.45444	0.332452	0.220534	0.154537	0.169066	-0.229669	-0.0920846	-0.223738	0.44913	-0.0946024	0.390448	-0.0430927	0.493072	0.241998	0.0920644	0	0	0	0	0	0
Synpcc7942_0236	637798642		cyclic nucleotide-binding domain (cNMP-BD) protein	chromosome	+	232018	232557	1	0.456581	234.238	1	Dusk	0.868214	0.110792	0.0976821	0.144882	2.03815	1.84473	0.63227	0.619094	3.32342	3.06554	2.62141	0.533738	0.382025	0.302467	0.267268	-2.70293	-2.88462	-2.31591	1.49841	1.35456	-0.190241	-0.220624	2.20381	2.08729	1.86149	-0.43465	-0.917117	-1.25401	0	0	1	22	0	0
Synpcc7942_0237	637798643		hypothetical protein	chromosome	-	232565	233143	0	0.0643395	173.637	0		0.171837	0.180826	0.223995	0.201645	0.215624	0.160044	0.173168	0.162974	0.0936423	0.0958341	0.117462	0.187737	0.156769	0.202909	-0.203949	-0.130385	0.17848	0.0268321	0.123532	-0.306515	-0.192815	-0.280345	-1.07975	-1.04638	-0.752796	-0.076275	-0.336349	0.035847	0	0	0	0	0	0
Synpcc7942_0238	637798644		hypothetical protein	chromosome	-	233143	234324	1	0.0885298	240.296	0		0.327006	0.290167	0.366018	0.390519	0.362895	0.289536	0.304927	0.352631	0.214936	0.198446	0.237513	0.30747	0.284174	0.292527	-0.0887342	-0.26117	0.0738624	0.167342	0.0614994	-0.264311	-0.189588	0.020109	-0.694145	-0.809308	-0.550045	-0.177604	-0.291275	-0.249481	0	0	0	0	0	0
Synpcc7942_0239	637798645	petJ	cytochrome C6 soluble cytochrome f	chromosome	-	234331	234669	1	0.164172	187.433	0		0.707334	0.430556	0.599559	0.761592	0.882634	0.605719	0.519923	0.709405	0.543788	0.498484	0.424569	0.3417	0.419531	0.486031	0.00210827	-0.714081	-0.236382	0.108734	0.321531	-0.221636	-0.441985	0.00632507	-0.377239	-0.502736	-0.734285	-1.04755	-0.751506	-0.539234	0	0	0	0	0	0
Synpcc7942_0240	637798646	apcD	hypothetical protein	chromosome	-	234851	235342	1	0.246398	203.844	1	Dusk	3.43778	0.957082	1.47638	2.26048	5.83915	4.50529	2.62244	3.57282	4.84727	3.73201	2.72929	1.2263	1.23618	1.47351	-0.0531225	-1.89789	-1.27254	-0.657968	0.711158	0.337021	-0.443688	0.00246398	0.442572	0.0653516	-0.386076	-1.54029	-1.52871	-1.27535	0	0	1	23	0	0
Synpcc7942_0241	637798647	rumA	23S rRNA (uracil-5-)-methyltransferase RumA	chromosome	+	235487	236854	0	0.104962	75.1705	0		0.189933	0.183606	0.190671	0.208964	0.187622	0.193977	0.191718	0.165153	0.186845	0.165933	0.198283	0.1228	0.135187	0.189565	0.0691026	0.0202243	0.0746994	0.20687	0.0514453	0.0994998	0.0825985	-0.132583	0.0454518	-0.125787	0.131171	-0.560077	-0.42143	0.0663079	0	0	0	0	0	0
Synpcc7942_0242	637798648		K+-dependent Na+/Ca+ exchanger related-protein	chromosome	-	237166	238275	0	0.0485373	169.168	0		0.793161	0.944157	0.898539	0.914112	0.868376	0.866131	0.894248	0.906943	0.833868	0.748322	0.757333	0.793312	0.840916	0.876422	-0.104174	0.147238	0.0757935	0.100582	0.0265321	0.0227978	0.0688873	0.089224	-0.0319688	-0.188128	-0.170861	-0.103899	-0.0198269	0.0398366	0	0	0	0	0	0
Synpcc7942_0243	637798649	hliC	possible high light inducible polypeptide HliC	chromosome	-	238379	238522	1	0.463008	10.1822	1	Dusk	3.59878	63.4593	21.3467	7.15912	3.15797	3.33456	3.69394	2.46764	4.59354	4.71741	5.51925	9.77122	6.87307	5.89345	0.526915	4.66717	3.09535	1.51919	0.338404	0.416903	0.564569	-0.0174617	0.879014	0.917402	1.14388	1.96795	1.46036	1.23852	0	0	1	24	1	44
Synpcc7942_0244	637798650	glgP	Glycogen/starch/alpha-glucan phosphorylase	chromosome	-	238622	241156	1	1.11526	347.26	1	Dusk	1.03965	0.266524	0.194145	0.259007	1.9983	2.33658	1.71843	0.637481	2.04837	3.50817	3.58847	1.09299	1.00756	1.06838	0.514127	-1.44963	-1.90676	-1.4909	1.45681	1.68243	1.23912	-0.19151	1.49251	2.26875	2.3014	0.586322	0.468895	0.553463	0	0	0	0	0	0
Synpcc7942_0245	637798651	gap1, gap	glyceraldehyde-3-phosphate dehydrogenase	chromosome	-	241168	242229	1	1.21836	350.886	1	Dusk	1.43628	0.33121	0.278875	0.390444	3.13925	3.17095	2.52027	0.777845	3.24044	5.2771	5.66455	1.65989	1.35701	1.484	0.40565	-1.71087	-1.959	-1.4735	1.53374	1.54823	1.21689	-0.479131	1.57951	2.28306	2.38528	0.6144	0.323742	0.452808	1	14	0	0	1	45
Synpcc7942_0246	637798652		extracellular solute-binding protein, family 3	chromosome	+	242421	243500	0	0.290354	161.675	0		0.612389	0.446032	0.469591	0.506529	0.544411	0.545035	0.630316	0.752399	0.615341	0.676474	0.610687	0.822974	0.50652	0.559386	-0.0753862	-0.532687	-0.458431	-0.349189	-0.24514	-0.243488	-0.0337603	0.221663	-0.0684487	0.068198	-0.0794025	0.351011	-0.349217	-0.205991	1	14	0	0	1	45
Synpcc7942_0247	637798653	bgtB	ABC-type permease for basic amino acids and glutamine	chromosome	+	243507	244640	0	0.184056	199.037	0		0.313706	0.257877	0.291041	0.32479	0.238639	0.248862	0.325745	0.364704	0.246574	0.243915	0.22804	0.398912	0.297059	0.293959	-0.213148	-0.495876	-0.321341	-0.163053	-0.607731	-0.547218	-0.15882	0.00416665	-0.560543	-0.576186	-0.673274	0.133509	-0.291812	-0.306944	0	0	0	0	0	0
Synpcc7942_0248	637798654		Amino acid ABC transporter, permease protein, 3-TM region, His/Glu/Gln/Arg/opine	chromosome	+	244642	245832	0	0.109814	273.709	0		0.2428	0.239906	0.261265	0.291055	0.227218	0.252866	0.309269	0.283867	0.199655	0.183534	0.18791	0.293623	0.273061	0.19448	-0.204778	-0.222078	-0.0990336	0.0567448	-0.30047	-0.146175	0.144313	0.0206662	-0.487042	-0.608501	-0.574502	0.0694185	-0.0353259	-0.524926	0	0	0	0	0	0
Synpcc7942_0249	637798655	bgtA	ATPase	chromosome	+	245851	246636	0	0.253792	229.899	0		0.510881	0.429796	0.359561	0.388961	0.361156	0.420672	0.365232	0.41367	0.378409	0.565833	0.450746	0.546893	0.458841	0.326285	0.320137	0.0708001	-0.186615	-0.0732264	-0.180229	0.0398434	-0.164038	0.0156279	-0.112905	0.467524	0.139464	0.418407	0.165144	-0.32672	0	0	0	0	0	0
Synpcc7942_0250	637798656		hypothetical protein	chromosome	+	246639	247106	0	0.116625	354.485	0		0.322713	0.338326	0.285394	0.252043	0.19076	0.189003	0.275129	0.322605	0.235015	0.226349	0.245018	0.368338	0.345378	0.256137	0.0550384	0.123204	-0.122255	-0.301542	-0.703454	-0.7168	-0.175104	0.0545564	-0.402461	-0.45666	-0.342322	0.245819	0.152964	-0.278295	0	0	0	0	0	0
Synpcc7942_0251	637798657		Exonuclease	chromosome	+	247110	247880	0	0.0714907	88.3556	0		0.115119	0.171249	0.161938	0.131135	0.0886532	0.114726	0.105404	0.162952	0.0592721	0.0872349	0.101545	0.181572	0.180056	0.114594	-0.167489	0.405484	0.324823	0.0204411	-0.544369	-0.172425	-0.29468	0.333835	-1.12519	-0.567637	-0.3485	0.489926	0.477832	-0.174082	0	0	0	0	0	0
Synpcc7942_0252	637798658	cp12	hypothetical protein	chromosome	-	247909	248136	1	0.406186	32.2968	1	Dusk	3.50355	2.62402	1.25015	1.40952	5.86728	6.44281	5.08265	2.89708	11.3907	17.7474	16.3748	4.36783	4.76029	4.62707	0.177514	-0.239529	-1.3092	-1.1361	0.921386	1.05638	0.714274	-0.0967074	1.87848	2.51823	2.4021	0.49561	0.619743	0.578793	0	0	0	0	0	0
Synpcc7942_0253	637798659		hypothetical protein	chromosome	-	248171	248629	0	0.126436	238.153	0		0.653403	2.11246	0.585144	0.728999	0.817509	0.851133	0.95654	1.97946	6.02263	5.76969	6.38167	3.11213	3.79857	2.59079	0.409963	2.10284	0.250781	0.567907	0.733225	0.791375	0.959816	2.00902	3.61431	3.55241	3.69785	2.66182	2.94937	2.39731	0	0	0	0	0	0
Synpcc7942_0254	637798660	gyrA	DNA gyrase subunit A	chromosome	+	248859	251429	1	0.154445	115.531	1	Dawn	1.11668	1.37454	1.40605	1.42086	1.07563	1.09684	1.08066	1.46663	2.02662	1.56504	1.34756	1.02132	1.52397	1.4502	-0.0990262	0.200706	0.233401	0.248518	-0.153061	-0.124889	-0.146335	0.294258	0.760828	0.387953	0.172101	-0.227814	0.349584	0.278003	0	0	0	0	0	0
Synpcc7942_0255	637798661		ATPase	chromosome	-	251503	252783	0	0.210031	356.349	0		0.500096	0.217012	0.215709	0.230203	0.45191	0.549115	0.544184	0.277393	0.449254	0.584768	0.819833	0.395563	0.337996	0.379901	0.321851	-0.882582	-0.891265	-0.797446	0.175681	0.456754	0.443741	-0.528424	0.167178	0.547509	1.03498	-0.0164479	-0.243347	-0.0747322	0	0	0	0	0	0
Synpcc7942_0256	637798662	ama	Peptidase M20D, amidohydrolase	chromosome	+	252873	254099	1	0.285212	347.722	1	Dusk	0.421768	0.253464	0.219681	0.219734	0.439966	0.526938	0.559102	0.258839	0.407794	0.498817	0.732811	0.353912	0.326367	0.399734	0.163206	-0.571462	-0.777831	-0.777481	0.224151	0.484392	0.56987	-0.541188	0.114597	0.40527	0.9602	-0.0898533	-0.206749	0.0857974	0	0	0	0	0	0
Synpcc7942_0257	637798663		Protein of unknown function DUF92, transmembrane	chromosome	-	254096	254845	0	0.0582148	303.718	0		0.192783	0.187735	0.199379	0.202211	0.167392	0.150231	0.192789	0.164639	0.123929	0.171508	0.138129	0.185924	0.155974	0.14009	-0.110773	-0.149058	-0.0622402	-0.041895	-0.314525	-0.470574	-0.110733	-0.338446	-0.748241	-0.279476	-0.591732	-0.163041	-0.416449	-0.571402	0	0	0	0	0	0
Synpcc7942_0258	637798664		hypothetical protein	chromosome	+	254894	255334	1	0.272453	220.756	0		0.163931	0.0959	0.088885	0.105079	0.137595	0.181473	0.126841	0.207859	0.258185	0.352686	0.202636	0.214118	0.113369	0.142949	-0.082983	-0.856473	-0.966063	-0.724599	-0.335644	0.0636761	-0.453054	0.259531	0.572331	1.02231	0.222814	0.302329	-0.615047	-0.280578	0	0	0	0	0	0
Synpcc7942_0259	637798665		hypothetical protein	chromosome	+	255474	255806	1	0.494915	169.751	1	Dawn	4.71813	1.62316	3.39332	4.50007	2.04004	1.91947	2.52919	4.29426	2.27715	1.95412	1.30853	1.31394	1.49992	2.36208	0.00114306	-1.53827	-0.474374	-0.0671227	-1.20848	-1.29637	-0.898398	-0.134663	-1.04984	-1.27055	-1.84912	-1.84317	-1.65219	-0.997015	0	0	1	25	0	0
Synpcc7942_0260	637798666	clpC, SyclpC	ATPase	chromosome	-	255961	258435	0	0.157177	280.85	0		6.37492	6.90903	5.88165	6.08504	6.49503	6.60828	5.92673	7.67902	12.9556	10.0092	9.07443	6.09122	7.36213	6.54659	0.0345548	0.15063	-0.0816321	-0.0325863	0.0614823	0.0864209	-0.070617	0.303069	1.05765	0.685406	0.543954	-0.031123	0.242271	0.0728908	1	15	0	0	1	46
Synpcc7942_0261	637798667	rimI	ribosomal-protein-alanine acetyltransferase	chromosome	-	258579	259178	0	0.0608489	129.475	0		0.271996	0.232949	0.280679	0.323978	0.295261	0.315906	0.253299	0.236354	0.329186	0.238206	0.262288	0.23149	0.234608	0.265056	-0.0150103	-0.238582	0.0303242	0.237299	0.103391	0.200896	-0.117756	-0.217647	0.260306	-0.206389	-0.0674465	-0.247648	-0.228345	-0.0522993	0	0	0	0	0	0
Synpcc7942_0262	637798668	lysA	diaminopimelate decarboxylase	chromosome	+	259226	260620	0	0.0995025	221.82	0		0.993882	1.24927	1.51631	1.45817	1.19244	1.16323	1.12767	1.07842	1.02885	0.873874	0.876986	0.713881	1.0964	1.03527	-0.173276	0.156666	0.436144	0.379732	0.0894956	0.0537097	0.00891572	-0.0555009	-0.123385	-0.358926	-0.353798	-0.650667	-0.031644	-0.114419	0	0	0	0	1	47
Synpcc7942_0263	637798669		Protein of unknown function DUF147	chromosome	+	260700	261620	0	0.0768725	165.754	0		0.639617	0.809752	0.996233	0.936378	0.614921	0.671142	0.66923	0.601856	0.497868	0.579654	0.626815	0.541239	0.6161	0.572472	0.130011	0.470284	0.769287	0.679895	0.0732048	0.199422	0.195307	0.0422211	-0.231432	-0.0120039	0.100844	-0.110931	0.075968	-0.0299905	0	0	0	0	0	0
Synpcc7942_0264	637798670	uppS	Undecaprenyl pyrophosphate synthetase	chromosome	+	261617	262372	0	0.0898876	65.3458	0		0.580388	0.585341	0.651	0.575547	0.512951	0.554367	0.52282	0.427945	0.422112	0.516002	0.478047	0.601273	0.50209	0.515482	0.272673	0.284933	0.438315	0.260591	0.0944773	0.206497	0.121971	-0.166917	-0.186717	0.103032	-0.00719077	0.323675	0.0636009	0.101578	0	0	0	0	0	0
Synpcc7942_0265	637798671		hypothetical protein	chromosome	-	262385	262660	0	0.0900284	315.063	0		0.591296	0.739996	0.620692	0.473168	0.472558	0.408235	0.518147	0.425899	0.437792	0.508701	0.409735	0.463457	0.534639	0.487961	0.197761	0.521398	0.267758	-0.123768	-0.125628	-0.336719	0.00724004	-0.27561	-0.235874	-0.0193034	-0.331428	-0.153684	0.0524454	-0.0793546	0	0	0	0	0	0
Synpcc7942_0266	637798672	dnaJ4, dnaJ	Heat shock protein DnaJ-like	chromosome	-	262638	263195	0	0.0797938	253.634	0		0.365586	0.46954	0.517753	0.376405	0.342483	0.358555	0.347076	0.330484	0.381725	0.427897	0.378402	0.351234	0.369701	0.348341	-0.0759642	0.285072	0.426086	-0.0338897	-0.170144	-0.103984	-0.150926	-0.221596	-0.0136418	0.151086	-0.0262572	-0.133743	-0.0598168	-0.145675	0	0	0	0	0	0
Synpcc7942_0267	637798673	gidB	glucose-inhibited division protein B	chromosome	+	263757	264485	1	0.301637	310.902	1	Dusk	1.91071	0.331102	0.357139	0.415246	3.42323	3.23128	1.58457	0.812145	8.0048	10.2836	9.2056	0.812562	0.797008	0.974156	0.379347	-2.14942	-2.04021	-1.82273	1.22059	1.13734	0.109327	-0.854953	2.4461	2.80751	2.64775	-0.854212	-0.882095	-0.592538	1	16	1	26	1	48
Synpcc7942_0268	637798674		hypothetical protein	chromosome	-	264482	264964	0	0.165243	201.163	0		0.108182	0.138816	0.119229	0.153258	0.129963	0.111188	0.125644	0.167457	0.121876	0.118363	0.0785906	0.170493	0.154764	0.118653	-0.435984	-0.0762716	-0.29571	0.066515	-0.171349	-0.39644	-0.220099	0.194344	-0.264029	-0.306225	-0.897017	0.220268	0.0806241	-0.302696	0	0	0	0	0	0
Synpcc7942_0269	637798675		hypothetical protein	chromosome	-	264976	265857	0	0.245312	107.165	0		0.196393	0.185952	0.188195	0.241546	0.206393	0.186248	0.184278	0.250654	0.204616	0.171577	0.175737	0.264535	0.206926	0.199803	-0.189825	-0.268636	-0.251343	0.108726	-0.118176	-0.266343	-0.281682	0.162126	-0.13065	-0.384714	-0.350149	0.239889	-0.114453	-0.164989	0	0	0	0	0	0
Synpcc7942_0270	637798676		TPR repeat	chromosome	+	265975	267168	1	0.261716	194.389	0		0.384867	0.368458	0.438941	0.526212	0.533906	0.395984	0.397327	0.533792	0.576051	0.367554	0.284138	0.32691	0.389862	0.504378	-0.207774	-0.270632	-0.0181048	0.243512	0.264453	-0.166689	-0.161807	0.264145	0.374065	-0.274177	-0.64554	-0.443239	-0.18917	0.182372	0	0	0	0	0	0
Synpcc7942_0271	637798677	cobA	uroporphyrinogen-III C-methyltransferase	chromosome	+	267165	267896	0	0.17125	227.595	0		0.255217	0.228285	0.255187	0.323929	0.301092	0.264693	0.203297	0.325589	0.324848	0.178023	0.160972	0.170996	0.216837	0.275325	-0.0891805	-0.250067	-0.0893484	0.254775	0.149301	-0.0365815	-0.417316	0.26215	0.258861	-0.608841	-0.754089	-0.666938	-0.324293	0.0202353	0	0	0	0	0	0
Synpcc7942_0272	637798678	hemD	Uroporphyrinogen-III synthase	chromosome	+	267889	268683	0	0.161008	149.956	0		0.294415	0.335403	0.435232	0.420137	0.338644	0.301998	0.290736	0.324883	0.300079	0.195641	0.180048	0.236859	0.2717	0.290152	-0.35546	-0.167416	0.208474	0.157547	-0.153543	-0.318773	-0.3736	-0.21339	-0.327967	-0.945104	-1.06493	-0.669283	-0.471298	-0.376504	0	0	0	0	0	0
Synpcc7942_0273	637798679	coaE	Dephospho-CoA kinase	chromosome	+	268662	269291	1	0.108575	219.796	0		0.161335	0.162913	0.208167	0.19965	0.153885	0.118674	0.129833	0.123248	0.0995857	0.0720623	0.0866134	0.133326	0.120193	0.122048	-0.0296509	-0.0156039	0.338032	0.277771	-0.0978504	-0.472708	-0.343054	-0.418139	-0.725695	-1.19239	-0.927044	-0.304752	-0.454349	-0.432258	0	0	0	0	0	0
Synpcc7942_0274	637798680		hypothetical protein	chromosome	+	269329	269667	0	0.148456	192.697	0		0.287157	0.30428	0.255526	0.275167	0.228374	0.158419	0.193025	0.151106	0.18964	0.208322	0.221616	0.191093	0.221936	0.222588	0.709456	0.793019	0.54109	0.647927	0.379016	-0.148638	0.136409	-0.216817	0.110885	0.246431	0.335678	0.121895	0.337764	0.341997	0	0	0	0	0	0
Synpcc7942_0275	637798681		hypothetical protein	chromosome	+	269657	269989	0	0.112416	201.786	0		0.227846	0.297372	0.180202	0.213257	0.16337	0.129651	0.169563	0.137636	0.12793	0.141383	0.208985	0.192888	0.215732	0.187876	0.701683	1.08589	0.36324	0.606215	0.221771	-0.111742	0.275449	-0.0255122	-0.131025	0.0132385	0.577023	0.461386	0.622862	0.423408	0	0	0	0	0	0
Synpcc7942_0276	637798682	glcD	glycolate oxidase subunit GlcD	chromosome	-	270001	271473	0	0.0852108	168.142	0		0.592839	0.264005	0.298308	0.320315	0.874081	0.702012	0.523407	0.405232	0.823458	0.818467	0.74411	0.319777	0.306462	0.348863	0.178371	-0.988704	-0.812464	-0.709775	0.738499	0.422228	-0.00133393	-0.37052	0.652427	0.643656	0.506247	-0.712202	-0.773561	-0.586609	0	0	0	0	0	0
Synpcc7942_0277	637798683	ligA, lig	NAD-dependent DNA ligase LigA	chromosome	-	271493	273532	0	0.0566466	172.28	0		0.136489	0.142591	0.144942	0.138949	0.158297	0.160018	0.147965	0.135596	0.140103	0.110036	0.13064	0.109798	0.128011	0.130164	-0.157082	-0.0939877	-0.0703989	-0.131316	0.0567664	0.072359	-0.0406176	-0.166559	-0.119379	-0.467892	-0.220275	-0.471025	-0.2496	-0.225545	0	0	0	0	0	0
Synpcc7942_0278	637798684	hoxE	bidirectional hydrogenase complex protein HoxE	chromosome	+	273657	274154	1	0.638724	355.109	0		0.153792	0.0579965	0.0369264	0.0507557	0.194674	0.285457	0.269151	0.0606342	0.276849	0.308942	0.500216	0.137798	0.12671	0.157275	0.0918721	-1.31507	-1.96639	-1.50747	0.431953	0.984164	0.899309	-1.25091	0.939991	1.09823	1.79344	-0.066552	-0.187581	0.12418	0	0	0	0	0	0
Synpcc7942_0279	637798685	hoxF	NADH dehydrogenase (quinone)	chromosome	+	274154	275758	1	0.504462	358.712	0		0.17036	0.0668393	0.0500513	0.0532449	0.207719	0.201419	0.24988	0.085669	0.216683	0.306433	0.37841	0.167604	0.123088	0.138959	0.305015	-1.0448	-1.46209	-1.37286	0.591059	0.546624	0.857661	-0.686726	0.65201	1.152	1.45638	0.281483	-0.163882	0.0110876	0	0	0	0	0	0
Synpcc7942_0280	637798686	cinA	competence damage-inducible protein A	chromosome	-	275768	277033	0	0.079744	41.4614	0		0.162831	0.436314	0.462906	0.363657	0.144892	0.138905	0.178403	0.168237	0.0868775	0.0823461	0.101195	0.16565	0.264936	0.232754	-0.297492	1.1245	1.20985	0.861708	-0.465892	-0.52677	-0.165731	-0.250374	-1.20382	-1.2811	-0.983738	-0.27273	0.404771	0.217932	0	0	0	0	0	0
Synpcc7942_0281	637798687		probable glycosyltransferase	chromosome	-	277043	278116	0	0.109898	136.19	0		0.729776	1.63226	1.57255	1.30226	0.620835	0.729465	0.831359	0.749574	0.312995	0.360088	0.466833	0.601126	0.899836	0.879563	-0.0768289	1.08452	1.03075	0.75866	-0.310071	-0.0774422	0.111189	-0.0382115	-1.29814	-1.09593	-0.721376	-0.356613	0.22538	0.192505	0	0	0	0	0	0
Synpcc7942_0282	637798688	glyA, gylA	serine hydroxymethyltransferase	chromosome	-	278139	279422	0	0.252289	57.1048	0		2.08546	3.81032	3.90611	3.49279	1.96909	2.12162	2.23782	2.22866	1.2861	1.41693	1.59703	1.66065	2.40959	2.50543	-0.121571	0.747974	0.783795	0.622442	-0.204407	-0.0967718	-0.0198433	-0.0257642	-0.818935	-0.679174	-0.506544	-0.450193	0.0868505	0.14312	0	0	0	0	1	49
Synpcc7942_0283	637798689		Dihydrouridine synthase TIM-barrel protein nifR3	chromosome	-	279619	280623	0	0.0436088	47.7125	0		0.0804807	0.092374	0.100638	0.0940152	0.0770335	0.0796313	0.109217	0.0756505	0.08786	0.0736159	0.0794752	0.0628195	0.0792089	0.0855365	-0.266574	-0.0677301	0.0558875	-0.0423226	-0.32973	-0.281882	0.173907	-0.355867	-0.14001	-0.3952	-0.284712	-0.624004	-0.289554	-0.178677	0	0	0	0	0	0
Synpcc7942_0284	637798690	ccmK3	carbon dioxide concentrating mechanism protein CcmK	chromosome	+	280701	281009	1	0.257501	163.508	1	Dawn	3.03222	3.89904	4.68425	4.95282	3.65436	3.15224	3.29432	3.16721	2.96036	1.97258	1.74799	2.17996	2.8731	3.66607	-0.171433	0.191311	0.456011	0.536442	0.097811	-0.11543	-0.0518258	-0.108595	-0.206037	-0.791725	-0.966112	-0.647505	-0.249197	0.102428	0	0	0	0	1	50
Synpcc7942_0285	637798691	ccmK4	carbon dioxide concentrating mechanism protein CcmK	chromosome	+	281054	281395	1	0.396266	135.19	1	Dawn	3.79866	5.27518	6.04346	6.31204	4.38873	3.9011	4.16302	4.74569	3.55344	2.14607	1.95855	3.07241	4.12019	4.84561	-0.269015	0.204716	0.400871	0.463603	-0.0606996	-0.230625	-0.136874	0.0521135	-0.365286	-1.09281	-1.22472	-0.575135	-0.151793	0.0821741	0	0	0	0	0	0
Synpcc7942_0286	637798692		hypothetical protein	chromosome	+	281480	281842	0	0.0976272	71.5338	0		0.763104	0.89227	0.970525	1.01132	0.726287	0.655598	0.774842	0.739744	0.488631	0.365936	0.409569	0.604945	0.770215	0.934107	-0.136154	0.0894465	0.210732	0.270131	-0.207495	-0.355222	-0.114132	-0.181008	-0.779287	-1.19644	-1.03393	-0.471229	-0.122772	0.155554	0	0	0	0	0	0
Synpcc7942_0287	637798693		hypothetical protein	chromosome	+	281897	282592	0	0.0815002	319.181	0		0.244764	0.296411	0.25309	0.275833	0.150316	0.172477	0.180451	0.153396	0.0689978	0.0930114	0.103397	0.188517	0.201551	0.204481	0.16273	0.438937	0.210987	0.335134	-0.540663	-0.342255	-0.277051	-0.511397	-1.66404	-1.23318	-1.08046	-0.213963	-0.117516	-0.0966971	0	0	0	0	0	0
Synpcc7942_0288	637798694	glmU	glucosamine-1-phosphate N-acetyltransferase / UDP-N-acetylglucosamine pyrophosphorylase	chromosome	-	282604	283962	1	0.373211	141.557	0		0.381328	0.431883	0.592538	0.6616	0.385428	0.348682	0.408497	0.663003	0.396682	0.268488	0.208906	0.448401	0.351814	0.439625	-0.401807	-0.222199	0.234068	0.393121	-0.386377	-0.530929	-0.302515	0.396177	-0.344857	-0.907981	-1.26998	-0.168051	-0.518027	-0.196564	0	0	0	0	0	0
Synpcc7942_0289	637798695	secA	preprotein translocase subunit SecA	chromosome	+	284148	286994	0	0.0553542	195.79	0		1.43835	1.58168	1.79957	1.85936	1.66417	1.58859	1.4682	1.57938	1.87994	1.39147	1.25525	1.12189	1.39924	1.53825	-0.0306666	0.106382	0.292569	0.339723	0.179721	0.112667	-0.00103181	0.104275	0.355604	-0.0784735	-0.227101	-0.389152	-0.0704326	0.0662105	0	0	0	0	1	51
Synpcc7942_0290	637798696	pyrD	dihydroorotate dehydrogenase 2	chromosome	+	287003	288139	0	0.0985438	308.68	0		0.429972	0.582436	0.636301	0.622989	0.441667	0.463995	0.463193	0.389351	0.344701	0.245489	0.324117	0.317708	0.468747	0.425915	-0.0523647	0.385493	0.513104	0.482602	-0.0136468	0.0575034	0.0550091	-0.195534	-0.37126	-0.860946	-0.460091	-0.488904	0.0722023	-0.0660418	0	0	0	0	0	0
Synpcc7942_0291	637798697		hypothetical protein	chromosome	+	288312	288530	1	0.451061	12.7517	1	Dusk	1.72572	0.906692	0.87726	1.14593	2.00004	1.74541	1.69396	1.15721	3.09469	2.42621	2.04746	0.925007	1.09713	1.46981	-0.00839341	-0.936903	-0.984511	-0.599075	0.20444	0.00798127	-0.0351871	-0.584936	0.834204	0.483114	0.238247	-0.908052	-0.661856	-0.23996	0	0	0	0	1	52
Synpcc7942_0292	637798698	dfp, coaBC	bifunctional phosphopantothenoylcysteine decarboxylase/phosphopantothenate synthase	chromosome	+	288534	289760	0	0.108394	339.71	0		0.404267	0.244637	0.252811	0.283987	0.433145	0.405073	0.488569	0.307179	0.650829	0.413169	0.442781	0.294404	0.309752	0.356919	0.232814	-0.491853	-0.444436	-0.276668	0.332356	0.235689	0.506069	-0.163415	0.919784	0.264238	0.364098	-0.224695	-0.151382	0.0531032	0	0	0	0	0	0
Synpcc7942_0293	637798699		hypothetical protein	chromosome	-	289757	290095	1	0.338932	215.432	1	Dusk	0.432846	0.276895	0.275512	0.392335	0.362106	0.42245	0.43275	0.558298	0.390705	0.515844	0.422236	0.741701	0.441009	0.508572	-0.45938	-1.1039	-1.11112	-0.601148	-0.716822	-0.494454	-0.4597	-0.0921989	-0.607155	-0.2063	-0.495185	0.317602	-0.432427	-0.226783	0	0	0	0	1	53
Synpcc7942_0294	637798700	psbO, woxA	photosystem II manganese-stabilizing polypeptide	chromosome	+	290394	291227	1	0.169856	155.746	1	Dawn	10.995	4.20891	6.75122	11.2743	16.9031	13.1741	10.556	14.1766	14.985	8.91029	6.31516	5.15153	6.45798	8.92797	-0.219178	-1.60451	-0.922809	-0.182988	0.401258	0.0416744	-0.277963	0.147482	0.227485	-0.522485	-1.01914	-1.31296	-0.986875	-0.519625	0	0	0	0	1	53
Synpcc7942_0295	637798701	sat, met3, sopT	sulfate adenylyltransferase	chromosome	+	291417	292604	1	0.565175	143.877	1	Dawn	1.32251	1.66188	2.5447	2.94931	1.99024	1.373	1.36546	2.40512	2.16458	1.25189	0.805462	0.93254	1.32994	1.66992	-0.490197	-0.160657	0.454027	0.666907	0.0994743	-0.436137	-0.444081	0.372637	0.220618	-0.569363	-1.20558	-0.994233	-0.482114	-0.153694	0	0	0	0	0	0
Synpcc7942_0296	637798702		hypothetical protein	chromosome	+	292750	294765	1	0.156697	126.547	0		0.489258	0.556944	0.628916	0.666596	0.512374	0.471665	0.562782	0.561678	0.522518	0.394925	0.449542	0.473012	0.541737	0.530643	-0.144635	0.0423002	0.217637	0.301582	-0.0780326	-0.19747	0.0573455	0.0545128	-0.0497514	-0.453654	-0.266774	-0.193354	0.00236069	-0.0274893	0	0	0	0	0	0
Synpcc7942_0297	637798703	ftsH	FtsH peptidase homologue, chloroplast. Metallo peptidase. MEROPS family M41	chromosome	+	294872	296713	0	0.101619	93.2443	0		2.40769	6.34726	3.64366	2.91205	1.34154	2.08946	2.20193	2.81051	2.35941	2.39393	2.50812	2.48028	2.41591	2.1351	0.075649	1.47413	0.673385	0.350032	-0.76811	-0.128874	-0.0532356	0.298831	0.0464225	0.0673755	0.134603	0.118501	0.0805653	-0.0976968	0	0	1	28	1	54
Synpcc7942_0298	637798704		hypothetical protein	chromosome	-	296980	297627	0	0.0709	89.7162	0		0.152435	0.175898	0.16131	0.16067	0.124855	0.136502	0.135184	0.137299	0.0956241	0.11547	0.129362	0.17876	0.170787	0.148138	-0.45046	-0.243912	-0.368816	-0.374547	-0.738397	-0.609724	-0.623725	-0.601328	-1.1232	-0.85113	-0.687235	-0.220627	-0.286448	-0.49171	0	0	0	0	0	0
Synpcc7942_0299	637798705	mreC	rod shape-determining protein MreC	chromosome	-	297624	298373	1	0.17211	163.504	0		0.355027	0.424294	0.462637	0.535216	0.269687	0.280805	0.315217	0.552871	0.296397	0.197291	0.216157	0.370384	0.427796	0.36678	0.0110941	0.268231	0.393046	0.603288	-0.385549	-0.327265	-0.16049	0.650109	-0.249305	-0.836512	-0.704755	0.0721874	0.280088	0.058083	0	0	0	0	0	0
Synpcc7942_0300	637798706	mreB	rod shape-determining protein MreB	chromosome	-	298398	299435	1	0.264596	169.01	1	Dawn	0.739225	0.785557	0.793961	0.921859	0.641695	0.575204	0.59278	1.09764	0.650686	0.63662	0.573686	0.752082	0.789353	0.718669	-0.105327	-0.0176249	-0.00227228	0.213204	-0.309453	-0.467268	-0.423844	0.464995	-0.289379	-0.32091	-0.471081	-0.0804518	-0.0106705	-0.146015	0	0	0	0	1	55
Synpcc7942_0301	637798707	ssb	single-strand DNA-binding protein	chromosome	+	299628	299990	0	0.0572413	297.488	0		1.54593	0.986044	1.05318	1.15721	1.72733	1.68541	1.88695	1.33243	2.20631	1.96864	2.13281	1.24921	1.2877	1.42616	-0.0371084	-0.685857	-0.590828	-0.454926	0.122966	0.0875191	0.250476	-0.25152	0.476055	0.311622	0.427176	-0.344562	-0.30078	-0.153447	0	0	0	0	1	55
Synpcc7942_0302	637798708		Phospholipase D/Transphosphatidylase	chromosome	-	300008	301447	1	0.648403	354.267	0		0.138682	0.0873918	0.0783025	0.0672865	0.173398	0.253017	0.345941	0.0625335	0.0839102	0.164058	0.347081	0.209302	0.177979	0.22486	-0.209874	-0.876089	-1.03453	-1.25327	0.112427	0.657576	1.10887	-1.35896	-0.934741	0.0325517	1.11361	0.383925	0.150045	0.487369	0	0	0	0	0	0
Synpcc7942_0303	637798709		response regulator receiver domain protein (CheY-like)	chromosome	+	301543	302697	0	0.0974196	288.278	0		0.0192114	0.0192013	0.0108937	0.0161527	0.0126812	0.0519672	0.028784	0.0238093	0.0261538	0.0378509	0.0205407	0.104094	0.0294179	0.0219149	-0.310428	-0.31119	-1.1289	-0.560619	-0.9097	1.12521	0.272875	-0.000864865	0.134631	0.667936	-0.213905	2.12742	0.304305	-0.120481	0	0	0	0	0	0
Synpcc7942_0304	637798710		hypothetical protein	chromosome	+	302833	303480	1	1.27693	352.187	1	Dusk	3.73354	1.22333	1.17398	1.63178	3.87373	4.78733	4.63942	2.05117	3.4341	5.39856	5.01095	3.00842	2.59852	3.30252	0.519822	-1.08991	-1.14932	-0.674278	0.573001	0.878499	0.83322	-0.34428	0.399209	1.05185	0.944361	0.208282	-0.00303534	0.342842	0	0	0	0	0	0
Synpcc7942_0305	637798711		hypothetical protein	chromosome	+	303815	304045	1	0.537115	346.37	1	Dusk	1.32621	0.790378	0.726942	0.765949	1.39795	1.714	1.47347	0.781973	1.57594	1.97261	2.01984	1.11461	1.10948	1.19291	0.2491	-0.497592	-0.618294	-0.542886	0.325107	0.619164	0.401007	-0.513016	0.498002	0.821903	0.856033	-0.00166477	-0.00832688	0.0962827	0	0	0	0	1	56
Synpcc7942_0306	637798712	chlP	hypothetical protein	chromosome	-	304039	304347	0	0.0485998	176.501	0		0.213112	0.140205	0.0563801	0.0623241	0.148973	0.132905	0.119545	0.0680558	0.172959	0.214943	0.232895	0.0852797	0.10996	0.105098	0.969898	0.365823	-0.948458	-0.803855	0.453336	0.288681	0.135838	-0.676928	0.668713	0.982237	1.09796	-0.351443	0.0152652	-0.0499788	0	0	0	0	0	0
Synpcc7942_0307	637798713	napA, nha5, nhaS5	Na+/H+ antiporter	chromosome	-	304710	305936	1	0.215646	289.65	1	Dusk	0.757198	0.291294	0.23664	0.208944	0.933933	0.839325	0.557382	0.431105	1.23474	1.65747	1.30385	0.511404	0.436342	0.439435	0.451756	-0.926437	-1.22622	-1.4058	0.754405	0.600315	0.00975123	-0.360875	1.15723	1.582	1.23579	-0.11445	-0.343455	-0.333266	0	0	0	0	0	0
Synpcc7942_0308	637798714	chpX, cupB	CO2 hydration protein	chromosome	-	305969	307108	0	0.25036	261.042	0		1.17601	0.461012	0.383323	0.397516	1.58826	1.27655	0.815168	0.672595	2.00637	2.44769	1.98398	0.62941	0.661246	0.646407	0.467317	-0.88371	-1.14995	-1.0975	0.900863	0.585667	-0.0614193	-0.338778	1.238	1.52484	1.22181	-0.434516	-0.36333	-0.396073	0	0	0	0	0	0
Synpcc7942_0309	637798715	ndhF4	NAD(P)H-quinone oxidoreductase subunit F	chromosome	-	307139	309043	1	0.255825	223.367	1	Dusk	1.51948	0.668992	0.625425	0.616033	2.51088	2.29674	1.17813	1.03681	2.87541	3.8007	2.69252	0.814404	0.8969	0.799474	0.253257	-0.930261	-1.02741	-1.04924	0.977869	0.849266	-0.113825	-0.298166	1.17345	1.57594	1.07863	-0.646506	-0.507304	-0.673199	0	0	1	29	1	57
Synpcc7942_0310	637798716	ispE, ipk	4-diphosphocytidyl-2-C-methyl-D-erythritol kinase	chromosome	-	309473	310417	0	0.0864622	250.62	0		0.109829	0.108609	0.133657	0.129916	0.137279	0.118116	0.131787	0.10556	0.127043	0.0845175	0.100421	0.0923694	0.0939973	0.106129	-0.096329	-0.112444	0.186949	0.145997	0.225527	0.0086254	0.166624	-0.153522	0.113739	-0.474262	-0.225518	-0.346097	-0.320892	-0.14577	0	0	0	0	0	0
Synpcc7942_0311	637798717	ksgA	dimethyladenosine transferase	chromosome	-	310414	311253	0	0.139599	37.474	0		0.198544	0.147973	0.147483	0.159768	0.217543	0.275791	0.311598	0.129026	0.179808	0.234202	0.33139	0.212406	0.135795	0.207519	-0.327978	-0.752105	-0.756883	-0.641455	-0.196134	0.146139	0.322252	-0.949778	-0.470981	-0.0896782	0.411097	-0.230609	-0.876	-0.264189	0	0	0	0	0	0
Synpcc7942_0312	637798718		hypothetical protein	chromosome	-	311280	311708	1	0.623099	352.896	1	Dusk	0.764166	0.186345	0.0868591	0.109421	1.01937	1.68385	2.12805	0.15837	1.03274	1.69909	3.06004	0.570743	0.408457	0.728057	-0.254786	-2.2907	-3.39192	-3.05878	0.160938	0.885018	1.22279	-2.52538	0.179734	0.898019	1.74681	-0.675832	-1.15849	-0.324621	0	0	0	0	0	0
Synpcc7942_0313	637798719		hypothetical protein	chromosome	+	311762	312274	0	0.194713	153.546	0		0.757638	0.82943	0.902769	0.99247	1.11758	1.08997	0.99575	0.978568	0.899873	0.866948	0.863271	0.921401	0.967954	0.972846	-0.010105	0.120506	0.242743	0.37941	0.550688	0.514598	0.384169	0.359058	0.238108	0.184331	0.178199	0.272215	0.343323	0.350596	0	0	0	0	0	0
Synpcc7942_0314	637798720		succinate dehydrogenase subunit C	chromosome	-	312403	313032	0	0.0465752	300.24	0		0.271542	0.288168	0.327997	0.358225	0.243559	0.25239	0.246263	0.245641	0.165976	0.122773	0.16695	0.166439	0.259648	0.219838	-0.02805	0.0576843	0.244457	0.371639	-0.184951	-0.133569	-0.169025	-0.172676	-0.738248	-1.17323	-0.729805	-0.734229	-0.0926656	-0.332785	0	0	0	0	0	0
Synpcc7942_0315	637798721	purB	adenylosuccinate lyase	chromosome	-	313079	314374	0	0.194217	79.6886	0		3.27293	2.62454	2.97415	3.2487	4.55505	3.97807	3.2717	3.03348	6.52874	5.86822	4.6668	1.75202	2.64496	2.59831	0.214746	-0.10377	0.0766433	0.204028	0.691634	0.496234	0.214205	0.105139	1.21097	1.05709	0.7266	-0.686817	-0.0925889	-0.118262	0	0	0	0	1	58
Synpcc7942_0316	637798722	digD, orf7.5	hypothetical protein	chromosome	-	314432	314623	1	0.678921	341.833	1	Dusk	18.5506	7.69872	4.17137	6.24385	25.9588	20.1774	14.2233	11.5341	55.5582	61.5438	36.4476	9.00111	9.45511	9.68341	0.944484	-0.324295	-1.20839	-0.626476	1.42924	1.06575	0.561276	0.258916	2.52702	2.67463	1.91884	-0.0988085	-0.0278179	0.00660237	1	18	0	0	0	0
Synpcc7942_0317	637798723		hypothetical protein	chromosome	+	314897	315355	0	0.178395	267.315	0		0.528648	0.367433	0.27623	0.314676	0.698985	0.649247	0.394343	0.563881	1.05299	1.11181	0.835613	0.449716	0.423003	0.447405	0.378759	-0.146067	-0.557679	-0.369683	0.781714	0.675218	-0.0440985	0.471842	1.37287	1.45129	1.03929	0.145465	0.0571198	0.138033	1	18	0	0	1	58
Synpcc7942_0318	637798724		hypothetical protein	chromosome	+	315642	316097	1	0.352114	229.529	1	Dusk	1.17727	0.704639	0.992268	0.901406	1.43317	1.30011	0.866781	1.34448	2.2778	1.86951	1.3267	1.09316	1.03147	0.652481	0.493393	-0.247096	0.24675	0.108198	0.777158	0.636581	0.0516879	0.684997	1.44559	1.16061	0.665792	0.386453	0.302646	-0.358043	0	0	0	0	0	0
Synpcc7942_0319	637798725		hemolysin A	chromosome	+	316162	316980	0	0.0625211	262.889	0		0.281418	0.280233	0.333256	0.38725	0.35001	0.433293	0.286727	0.424653	0.462464	0.417797	0.42679	0.348564	0.336636	0.25016	0.063893	0.0578072	0.307809	0.524445	0.378577	0.686524	0.0908573	0.657466	0.78052	0.633982	0.664708	0.372603	0.32237	-0.105967	0	0	0	0	0	0
Synpcc7942_0320	637798726	galE, galD	UDP-galactose 4-epimerase	chromosome	+	317010	318008	0	0.131466	59.8174	0		0.12467	0.139909	0.200063	0.216871	0.158483	0.135975	0.151075	0.187833	0.13956	0.0959388	0.0807441	0.10716	0.1239	0.160627	-0.340586	-0.174211	0.341749	0.458133	0.00562508	-0.21536	-0.063439	0.250748	-0.177824	-0.718519	-0.967275	-0.558941	-0.34953	0.0250102	0	0	0	0	0	0
Synpcc7942_0321	637798727	glnB	nitrogen regulatory protein P-II	chromosome	-	318147	318485	0	0.168437	126.379	0		21.0152	12.4816	9.53013	10.0906	23.8023	25.8564	21.5208	17.7272	35.0675	34.4822	36.7252	21.7425	16.9788	14.2358	0.347388	-0.404246	-0.793478	-0.711027	0.527056	0.646477	0.381684	0.101916	1.08609	1.06181	1.15272	0.396473	0.0396922	-0.214523	0	0	1	30	1	59
Synpcc7942_0322	637798728	ycf44	c-type cytochrome biogenesis protein	chromosome	-	318679	320049	0	0.0529024	178.43	0		0.215621	0.183204	0.18743	0.201484	0.264538	0.266519	0.222476	0.196649	0.25875	0.252034	0.264183	0.193407	0.221632	0.167553	0.040122	-0.194928	-0.162027	-0.0577162	0.335098	0.345859	0.0852693	-0.0927575	0.303181	0.26524	0.333157	-0.116738	0.0797893	-0.32376	0	0	0	0	0	0
Synpcc7942_0323	637798729	ccdA	Cytochrome c biogenesis protein-like	chromosome	-	320046	320804	0	0.0807599	326.476	0		0.172579	0.0992098	0.10584	0.126865	0.280273	0.255277	0.167559	0.166239	0.326558	0.311257	0.307367	0.138874	0.129183	0.111372	0.0772904	-0.721415	-0.628089	-0.366672	0.776863	0.642096	0.0346995	0.0232895	0.997371	0.928138	0.909991	-0.236188	-0.340552	-0.554581	0	0	0	0	0	0
Synpcc7942_0324	637798730	ftsW	cell division protein FtsW	chromosome	-	320824	322008	0	0.141927	316.978	0		0.913903	0.373868	0.43329	0.488564	1.74102	1.43957	0.775751	0.802219	2.24131	2.40795	1.66439	0.601339	0.501781	0.442919	0.368819	-0.920693	-0.707887	-0.534674	1.29864	1.02434	0.132372	0.180774	1.66305	1.76651	1.2337	-0.235044	-0.496164	-0.676178	0	0	0	0	1	60
Synpcc7942_0325	637798731	apcC, apcI	Lc 7.8 apoprotein (core components of the phycobilisomes)	chromosome	-	322093	322296	1	0.254053	192.822	1	Dusk	70.3113	16.0314	21.4471	40.6463	83.395	77.9389	58.2909	71.2102	89.3928	66.3103	45.3945	19.8524	22.0593	41.355	0.0424449	-2.09041	-1.67053	-0.74819	0.288649	0.19103	-0.228043	0.060772	0.388847	-0.0420804	-0.588795	-1.782	-1.62992	-0.723249	0	0	0	0	0	0
Synpcc7942_0326	637798732	apcB, apcB2	allophycocyanin, beta subunit	chromosome	-	322388	322873	0	0.205551	223.369	0		81.7889	21.3614	24.3638	44.3908	93.5293	89.5889	65.8059	87.7438	101.87	90.2345	53.2891	23.0146	26.1545	47.8394	0.0100476	-1.92685	-1.73712	-0.871596	0.203561	0.141463	-0.303641	0.11144	0.3268	0.151822	-0.608018	-1.81931	-1.6348	-0.763657	0	0	0	0	0	0
Synpcc7942_0327	637798733	apcA	allophycocyanin alpha chain	chromosome	-	322930	323415	0	0.162994	170.777	0		91.2663	22.4905	28.5708	51.0059	106.666	101.43	74.9484	98.2917	115.334	88.7192	60.7335	25.5889	29.3335	52.3912	-0.0286755	-2.04944	-1.70422	-0.868095	0.196275	0.123653	-0.31286	0.0783117	0.308986	-0.069513	-0.616266	-1.86324	-1.66621	-0.829435	0	0	1	31	1	61
Synpcc7942_0328	637798734	apcE	phycobilisome core-membrane linker polypeptide	chromosome	-	323781	325898	0	0.135106	46.6594	0		12.1314	2.10125	3.54676	6.05795	14.6115	14.0149	10.4365	11.5859	13.3123	12.2306	8.93833	3.68895	4.1387	7.51634	0.0288889	-2.50054	-1.74529	-0.972958	0.297249	0.237101	-0.188218	-0.0374883	0.162896	0.0406389	-0.411782	-1.68858	-1.52261	-0.661757	0	0	1	32	1	62
Synpcc7942_0329	637798735		hypothetical protein	chromosome	+	326113	327357	1	0.189654	163.127	0		0.316208	0.0778811	0.20912	0.367374	0.437527	0.354389	0.403939	0.532281	0.310444	0.275515	0.165786	0.179027	0.174665	0.256627	-0.296834	-2.31836	-0.893378	-0.0804567	0.171664	-0.132372	0.0564303	0.454482	-0.323373	-0.495575	-1.22839	-1.11753	-1.15312	-0.598037	0	0	0	0	0	0
Synpcc7942_0330	637798736	atp1	hypothetical protein	chromosome	+	327394	327900	0	0.549819	132.002	0		15.9575	19.9151	30.9906	33.7006	17.7517	16.3644	18.5738	21.9194	12.6327	6.36929	5.2846	10.6354	16.3005	16.7115	-0.474641	-0.155018	0.482953	0.603896	-0.320922	-0.438319	-0.255607	-0.0166681	-0.811709	-1.79967	-2.06901	-1.06	-0.443961	-0.408037	0	0	0	0	1	63
Synpcc7942_0331	637798737	atpI	F0F1 ATP synthase subunit A	chromosome	+	327926	328711	1	0.472472	133.573	1	Dawn	16.6105	21.1886	31.6112	33.3365	18.5175	16.9327	19.0814	24.6096	10.9206	7.50664	5.26105	10.7646	15.3314	17.2171	-0.474851	-0.123655	0.453492	0.530161	-0.318058	-0.447131	-0.27478	0.0922761	-1.07989	-1.6207	-2.13352	-1.10064	-0.590458	-0.423098	0	0	0	0	0	0
Synpcc7942_0332	637798738	atpH, atpE	F0F1 ATP synthase subunit C	chromosome	+	328854	329099	1	0.563886	116.958	1	Dawn	17.5599	21.5338	32.8384	36.454	21.0657	17.9313	20.1494	26.5616	13.5012	6.85226	5.20461	11.3502	17.202	18.7052	-0.699525	-0.405205	0.203574	0.354268	-0.43691	-0.66933	-0.501073	-0.102465	-1.07872	-2.05716	-2.45395	-1.32909	-0.729235	-0.608372	0	0	0	0	0	0
Synpcc7942_0333	637798739	atpG	F0F1 ATP synthase subunit B	chromosome	+	329244	329720	1	0.604481	115.923	1	Dawn	7.59447	11.2125	15.5892	17.5776	8.75561	8.54777	9.27192	12.7613	5.33583	3.72423	2.80351	5.47031	8.32398	8.39718	-0.392195	0.169896	0.645334	0.818523	-0.186936	-0.221595	-0.104275	0.356563	-0.901432	-1.4202	-1.82991	-0.86552	-0.25987	-0.24724	0	0	0	0	0	0
Synpcc7942_0334	637798740	atpF	F0F1 ATP synthase subunit B	chromosome	+	329764	330279	1	0.572478	112.729	1	Dawn	5.04236	8.06417	11.1613	12.1203	5.88385	5.49978	6.50122	9.00462	3.42546	2.09204	1.81459	3.69822	5.88778	5.9179	-0.525123	0.152302	0.621214	0.740132	-0.302462	-0.39985	-0.158513	0.311442	-1.08293	-1.79431	-1.99958	-0.972392	-0.3015	-0.294137	0	0	0	0	1	65
Synpcc7942_0335	637798741	atpD, atpH	F0F1 ATP synthase subunit delta	chromosome	+	330289	330831	1	0.498814	129.655	1	Dawn	2.95935	4.47367	6.37664	6.99793	3.38457	3.35492	3.692	5.32359	1.95992	1.11323	1.06753	2.16663	3.70617	3.41077	-0.406953	0.189228	0.700564	0.834695	-0.213259	-0.225953	-0.0878292	0.440168	-1.00143	-1.81748	-1.87795	-0.856778	-0.0823019	-0.202133	0	0	0	0	0	0
Synpcc7942_0336	637798742	atpA	F0F1 ATP synthase subunit alpha	chromosome	+	330878	332395	1	0.503485	116.261	1	Dawn	3.67556	5.21327	6.93824	7.48505	3.99779	3.7591	4.45526	6.6659	2.61298	1.75733	1.41284	2.88237	4.71646	4.52662	-0.473693	0.0305302	0.442911	0.552354	-0.352454	-0.441272	-0.196148	0.385141	-0.965964	-1.53827	-1.85306	-0.824404	-0.113953	-0.173225	0	0	0	0	0	0
Synpcc7942_0337	637798743	atpC, atpG	F0F1 ATP synthase subunit gamma	chromosome	+	332458	333408	1	0.45737	116.092	1	Dawn	3.25224	5.35441	7.3887	7.60213	3.45066	3.19781	3.79383	5.90241	2.50203	1.28098	1.12677	2.21847	4.33947	4.07976	-0.488258	0.231035	0.695628	0.736711	-0.402822	-0.512609	-0.26604	0.371609	-0.866592	-1.83244	-2.0175	-1.04013	-0.0721742	-0.16121	0	0	0	0	0	0
Synpcc7942_0338	637798744	petF	Ferredoxin (2Fe-2S)	chromosome	+	333517	333834	1	0.126836	180.906	0		0.686518	1.42076	1.84593	1.82248	0.769844	0.688767	0.82143	1.22764	0.87442	0.623936	0.479962	0.616317	0.929579	0.904096	-0.102947	0.946345	1.32403	1.30559	0.0623218	-0.0982292	0.155892	0.735568	0.246081	-0.240848	-0.619326	-0.258573	0.334333	0.29423	0	0	0	0	0	0
Synpcc7942_0339	637798745		hypothetical protein	chromosome	+	333995	335074	0	0.102671	115.074	0		0.267092	0.58691	0.811926	0.775675	0.304818	0.255455	0.339589	0.404408	0.225912	0.176708	0.23871	0.261786	0.38607	0.342707	-0.20778	0.928023	1.39623	1.33034	-0.0171663	-0.27205	0.138673	0.390696	-0.449355	-0.803746	-0.369858	-0.236729	0.323745	0.151859	0	0	0	0	0	0
Synpcc7942_0340	637798746		hypothetical protein	chromosome	+	335071	335652	0	0.0619864	167.734	0		0.305006	0.36156	0.485593	0.422927	0.251663	0.249685	0.278361	0.255708	0.239553	0.203681	0.293499	0.210351	0.280229	0.287204	0.0594758	0.304874	0.730385	0.531046	-0.217868	-0.229253	-0.0724061	-0.194862	-0.289015	-0.523048	0.00399619	-0.476562	-0.0627567	-0.0272867	0	0	0	0	0	0
Synpcc7942_0341	637798747		hypothetical protein	chromosome	+	335633	336205	1	0.0331881	347.107	0		0.18238	0.307833	0.37836	0.353948	0.159456	0.181935	0.221029	0.207027	0.171673	0.179003	0.244284	0.211739	0.20246	0.2017	-0.175002	0.580195	0.877809	0.781587	-0.368797	-0.178527	0.102283	0.00786697	-0.26229	-0.201969	0.246608	0.0403342	-0.0243137	-0.029741	0	0	0	0	0	0
Synpcc7942_0342	637798748		hypothetical protein	chromosome	+	336363	336590	0	0.196548	302.764	0		0.320217	0.251091	0.22923	0.205885	0.321201	0.327914	0.347175	0.222306	0.421249	0.52361	0.443968	0.599553	0.232053	0.29325	0.151715	-0.199125	-0.330542	-0.485499	0.156141	0.185979	0.268327	-0.374788	0.547338	0.861157	0.623118	1.05655	-0.31288	0.0247948	0	0	0	0	0	0
Synpcc7942_0343	637798749	psb27	photosystem II 11 kD protein	chromosome	+	336654	337055	0	0.199211	105.557	0		4.97841	4.05548	4.59011	5.09299	6.67797	6.09022	5.63806	4.88375	7.42186	6.39956	5.2249	3.70772	3.86143	4.82093	-0.0300999	-0.325914	-0.147257	0.0027283	0.393626	0.26071	0.149413	-0.0577953	0.545996	0.332188	0.0396201	-0.455253	-0.396648	-0.0764727	0	0	0	0	0	0
Synpcc7942_0344	637798750		probable peptidase	chromosome	-	337408	338451	1	0.288059	228.573	1	Dusk	0.791883	0.735593	0.665635	0.673297	0.88987	0.868438	0.572693	0.897136	0.986	1.25787	0.840812	0.700959	0.799695	0.528813	0.314828	0.208448	0.0642716	0.0807845	0.483135	0.447963	-0.152698	0.494867	0.631129	0.98245	0.401324	0.13887	0.32899	-0.267701	0	0	0	0	0	0
Synpcc7942_0345	637798751	birA	Biotin--acetyl-CoA-carboxylase ligase	chromosome	-	338536	339306	0	0.104746	30.3849	0		0.187532	0.198007	0.240396	0.231048	0.178211	0.181649	0.171111	0.151762	0.160738	0.185374	0.149753	0.174451	0.163058	0.156715	-0.217608	-0.139197	0.140662	0.0834433	-0.291161	-0.263594	-0.349816	-0.522934	-0.440039	-0.234308	-0.542166	-0.321923	-0.419365	-0.476603	0	0	0	0	0	0
Synpcc7942_0346	637798752		Protein of unknown function DUF152	chromosome	+	339352	340131	0	0.105037	144.862	0		0.23584	0.222833	0.17682	0.199063	0.24143	0.270005	0.226643	0.255088	0.323724	0.295332	0.331535	0.256194	0.248921	0.259607	-0.218773	-0.300623	-0.634298	-0.463361	-0.184975	-0.0235984	-0.276161	-0.105586	0.238183	0.105755	0.272578	-0.0993444	-0.140895	-0.0802545	0	0	0	0	0	0
Synpcc7942_0347	637798753		hypothetical protein	chromosome	+	340288	340452	0	0.389668	166.979	0		13.1747	25.0594	30.558	28.2343	13.8056	12.5724	14.827	12.7809	10.3743	10.2823	7.72605	8.69065	12.7027	16.1479	-0.109986	0.8176	1.10379	0.989697	-0.0425011	-0.177494	0.0604677	-0.153761	-0.454733	-0.467585	-0.879951	-0.710219	-0.162623	0.183597	0	0	0	0	1	67
Synpcc7942_0348	637798754	recA	recombinase A	chromosome	-	340698	341768	0	0.195387	71.6941	0		1.0974	0.743535	0.653373	0.742859	1.25427	1.39124	1.49739	1.0613	1.07396	1.14059	1.31508	1.38349	0.996172	1.23609	-0.0351428	-0.596755	-0.783248	-0.598065	0.157617	0.307148	0.413219	-0.0833879	-0.0662813	0.0205587	0.22592	0.299087	-0.174759	0.136553	0	0	0	0	0	0
Synpcc7942_0349	637798755		hypothetical protein	chromosome	-	341883	342443	1	0.126095	5.78456	0		1.07941	0.611367	0.66508	0.70802	2.13467	2.11542	1.54549	0.90253	2.1138	1.79235	2.01158	0.850393	0.83322	0.792559	0.113269	-0.706865	-0.585376	-0.495113	1.09704	1.08397	0.631092	-0.144929	1.08287	0.844878	1.01135	-0.230774	-0.260206	-0.332385	0	0	0	0	0	0
Synpcc7942_0350	637798756		ATPase	chromosome	+	342793	343671	0	0.158114	138.487	0		0.197878	0.121458	0.110109	0.115023	0.188054	0.18329	0.158492	0.15888	0.229106	0.24294	0.199729	0.187992	0.132531	0.14072	0.312194	-0.391962	-0.533481	-0.470491	0.238732	0.201713	-0.00800453	-0.00447575	0.523602	0.608187	0.325627	0.23826	-0.266081	-0.179587	0	0	0	0	0	0
Synpcc7942_0351	637798757	ycf22	putative ABC transport system substrate-binding protein	chromosome	+	343699	344832	1	0.352376	237.124	0		0.381244	0.199207	0.201851	0.218119	0.218342	0.227504	0.229883	0.290052	0.333318	0.371432	0.322185	0.384388	0.228145	0.198359	0.234762	-0.701686	-0.682665	-0.570838	-0.569361	-0.510061	-0.495056	-0.159643	0.0409476	0.197145	-0.00806415	0.246611	-0.506004	-0.707836	0	0	0	0	0	0
Synpcc7942_0352	637798758		Methionine sulfoxide reductase B	chromosome	-	344823	345431	0	0.0460831	216.088	0		0.465433	0.470023	0.427511	0.362671	0.464977	0.520457	0.44972	0.438275	0.498564	0.499742	0.683038	0.498506	0.487787	0.446211	-0.199928	-0.185771	-0.322541	-0.559839	-0.201342	-0.0387216	-0.249474	-0.286665	-0.100722	-0.0973176	0.353464	-0.10089	-0.13225	-0.260777	0	0	0	0	0	0
Synpcc7942_0353	637798759		Na+-dependent transporter-like	chromosome	+	345470	346432	1	0.256116	266.029	0		0.311435	0.106579	0.0804037	0.0993655	0.418624	0.335698	0.194534	0.295642	0.585541	0.666121	0.466443	0.293022	0.17188	0.118527	0.504357	-1.04266	-1.44924	-1.14376	0.931082	0.612588	-0.174555	0.429278	1.4152	1.60121	1.08713	0.416433	-0.353176	-0.88936	0	0	0	0	0	0
Synpcc7942_0354	637798760	bgl, cglX	Beta-glucosidase-related glycosidase-like	chromosome	-	346832	348460	0	0.165751	139.499	0		0.265397	0.292546	0.288159	0.242352	0.200377	0.280546	0.347593	0.195294	0.273876	0.235858	0.33594	0.243658	0.279498	0.317213	-0.0028991	0.137615	0.115818	-0.133942	-0.408333	0.0771905	0.38635	-0.445399	0.0424739	-0.173133	0.337154	-0.126193	0.0717867	0.254404	0	0	0	0	0	0
Synpcc7942_0355	637798761	rbfA	ribosome-binding factor A	chromosome	-	348457	348870	1	0.213063	9.08664	1	Dusk	1.4281	1.31804	1.2671	1.15566	1.39493	1.61514	1.97444	1.2803	2.0131	1.9617	2.24065	1.23589	1.38115	1.6969	-0.0540425	-0.169747	-0.22661	-0.35942	-0.0879469	0.123515	0.413301	-0.211659	0.441275	0.40396	0.595776	-0.262596	-0.10227	0.194764	0	0	0	0	0	0
Synpcc7942_0356	637798762	ycf33	conserved hypothetical protein YCF33	chromosome	-	348922	349146	0	0.153391	133.044	0		1.4761	1.07277	1.23456	1.2812	1.27094	1.46019	1.48227	1.21263	2.01729	1.53199	1.9542	1.0687	1.21673	1.35208	-0.0131822	-0.473629	-0.270975	-0.217472	-0.229077	-0.0288179	-0.0071629	-0.296835	0.437446	0.0404378	0.391607	-0.479118	-0.291965	-0.139791	0	0	0	0	1	68
Synpcc7942_0357	637798763	ictB, dcl4, dc14	Inorganic carbon transporter	chromosome	-	349875	351278	1	0.0613233	158.073	0		0.307418	0.292041	0.327445	0.357918	0.36612	0.409507	0.329253	0.452415	0.454031	0.352698	0.336266	0.378113	0.329129	0.308861	-0.25659	-0.330623	-0.165539	-0.037162	-0.00447648	0.157096	-0.157597	0.300854	0.305997	-0.0583591	-0.127187	0.0420268	-0.15814	-0.249833	0	0	0	0	0	0
Synpcc7942_0358	637798764	dc13, dcl3, trmB	tRNA (guanine-N(7))-methyltransferase	chromosome	-	351309	351950	0	0.0799187	314.099	0		0.0958833	0.122914	0.134174	0.125613	0.0597517	0.0754499	0.107678	0.0974275	0.0591172	0.0798821	0.087458	0.077816	0.0816554	0.0944743	-0.069848	0.288445	0.414902	0.319786	-0.752147	-0.415608	0.0975298	-0.0467976	-0.76755	-0.333254	-0.202536	-0.37106	-0.301579	-0.0912054	0	0	0	0	0	0
Synpcc7942_0359	637798765		hypothetical protein	chromosome	+	352026	353207	1	0.218444	135.703	0		0.167742	0.102976	0.0962127	0.0997937	0.139257	0.16214	0.129471	0.192966	0.253598	0.25677	0.212089	0.235015	0.155228	0.138991	-0.0323456	-0.736275	-0.83429	-0.781569	-0.300838	-0.0813501	-0.405959	0.16976	0.563955	0.581888	0.30608	0.454164	-0.144199	-0.3036	0	0	0	0	0	0
Synpcc7942_0360	637798766		hypothetical protein	chromosome	-	353103	354299	0	0.107012	283.418	0		0.324702	0.255508	0.24338	0.248369	0.338536	0.336051	0.340342	0.253614	0.379836	0.393322	0.41688	0.225649	0.246145	0.285669	-0.157237	-0.502988	-0.573145	-0.543869	-0.0970448	-0.107674	-0.0893691	-0.51372	0.0690237	0.119358	0.20328	-0.682273	-0.556847	-0.342007	0	0	0	0	0	0
Synpcc7942_0361	637798767	cp12	hypothetical protein	chromosome	+	354532	354759	0	0.329819	137.83	0		11.2578	8.77236	7.96786	8.44656	8.02697	8.03158	6.82084	9.44802	9.64457	7.97953	7.99489	7.13684	9.60147	7.45903	0.0833948	-0.276498	-0.415271	-0.331099	-0.404606	-0.40378	-0.639514	-0.169451	-0.139745	-0.413159	-0.410385	-0.574177	-0.146207	-0.510476	0	0	0	0	1	69
Synpcc7942_0362	637798768		hypothetical protein	chromosome	+	354884	355483	1	0.213993	242.93	1	Dusk	1.09156	1.80944	2.21882	2.45541	1.37052	0.986327	1.09851	1.73087	0.926885	0.687995	0.686693	0.946089	1.48774	1.27752	-0.0367196	0.692426	0.986674	1.13285	0.291607	-0.182978	-0.0275702	0.628379	-0.272655	-0.702647	-0.705379	-0.243069	0.410005	0.190233	0	0	0	0	0	0
Synpcc7942_0363	637798769		hypothetical protein	chromosome	+	355509	355793	0	0.147733	100.773	0		0.605273	1.10933	1.2718	1.37468	0.712149	0.550525	0.579551	1.02734	0.508217	0.424788	0.369048	0.579808	0.974198	0.770829	-0.0160921	0.857931	1.05512	1.16734	0.2185	-0.15287	-0.0787431	0.747161	-0.268234	-0.526936	-0.72987	-0.0781032	0.670536	0.332731	0	0	0	0	0	0
Synpcc7942_0364	637798770		hypothetical protein	chromosome	+	355865	356416	0	0.159141	114.186	0		0.176352	1.45383	0.722388	0.545124	0.103609	0.158334	0.161562	0.296957	0.120674	0.106614	0.107448	1.32274	0.400979	0.460275	-0.347011	2.69632	1.68731	1.28112	-1.11431	-0.502491	-0.473374	0.404788	-0.894356	-1.07307	-1.06183	2.56	0.838063	1.03703	0	0	1	34	0	0
Synpcc7942_0365	637798771		response regulator receiver domain protein (CheY-like)	chromosome	+	356676	357305	0	0.224155	175.926	0		0.414698	0.984027	0.427087	0.32288	0.234703	0.807314	0.428866	0.572591	0.432768	0.548474	0.489554	4.19932	0.832108	0.490466	-0.667314	0.579324	-0.624844	-1.02838	-1.48854	0.293756	-0.618847	-0.20187	-0.605782	-0.263951	-0.427907	2.67271	0.337395	-0.425222	0	0	0	0	0	0
Synpcc7942_0366	637798772	ltnT	putative sulfate transporter	chromosome	+	357549	359732	0	0.0478371	181.167	0		0.194021	0.19081	0.125192	0.122623	0.123589	0.195753	0.219394	0.143197	0.122709	0.155519	0.185031	0.48866	0.189802	0.148915	-0.0498731	-0.0739455	-0.681938	-0.711856	-0.70053	-0.0370475	0.127442	-0.488083	-0.710846	-0.368994	-0.118318	1.28274	-0.0815878	-0.431593	0	0	0	0	0	0
Synpcc7942_0367	637798773		Na+-dependent transporter-like	chromosome	-	359767	360690	1	0.181696	162.472	0		0.130142	0.121124	0.146122	0.195395	0.145683	0.148152	0.136495	0.233425	0.170167	0.165598	0.100992	0.236469	0.133431	0.156092	-0.790101	-0.893698	-0.623016	-0.20379	-0.627355	-0.603107	-0.721332	0.052772	-0.40323	-0.442503	-1.15595	0.0714648	-0.754087	-0.527791	0	0	0	0	0	0
Synpcc7942_0368	637798774	xseA	exodeoxyribonuclease VII large subunit	chromosome	+	360711	362063	0	0.0805988	120.028	0		0.0470838	0.0430749	0.0350518	0.0364738	0.0427861	0.0412491	0.0499234	0.0657574	0.0698417	0.0863718	0.0765685	0.0742534	0.0577596	0.046593	0.0214439	-0.106941	-0.404299	-0.346928	-0.116644	-0.169426	0.10593	0.503367	0.5903	0.896772	0.722963	0.678669	0.316274	0.00632725	0	0	0	0	0	0
Synpcc7942_0369	637798775	aoxB	putative flavin-containing monoamine oxidase	chromosome	+	362147	363601	1	0.80644	342.904	1	Dusk	0.902719	0.213746	0.171953	0.213014	1.58092	1.46988	1.08189	0.56997	1.76258	2.5817	2.30886	1.01987	0.482727	0.597712	0.734163	-1.34422	-1.6581	-1.34916	1.54258	1.43752	0.995367	0.0707726	1.6995	2.25013	2.089	0.910203	-0.168906	0.139337	1	20	0	0	0	0
Synpcc7942_0370	637798776	metY	O-acetylhomoserine/O-acetylserine sulfhydrylase	chromosome	+	363763	365067	1	0.72824	349.745	1	Dusk	0.568236	0.14702	0.100494	0.391988	0.726861	0.888409	0.89609	0.29543	0.718764	1.56936	1.58042	0.595683	0.338847	0.449034	0.408667	-1.54181	-2.09071	-0.127013	0.763856	1.0534	1.06582	-0.535008	0.747694	1.87428	1.88442	0.476723	-0.337188	0.0690008	0	0	0	0	0	0
Synpcc7942_0371	637798777	metA	homoserine O-succinyltransferase	chromosome	+	365116	366015	1	0.463864	347.202	0		0.196442	0.0578792	0.0440914	0.114345	0.205365	0.258575	0.273821	0.0868729	0.174705	0.380195	0.462189	0.184826	0.109484	0.138498	0.589474	-1.17351	-1.56606	-0.191231	0.653562	0.985952	1.06861	-0.58765	0.420295	1.54211	1.82386	0.501539	-0.253911	0.0852355	0	0	0	0	0	0
Synpcc7942_0372	637798778		hypothetical protein	chromosome	+	366053	366853	0	0.0844536	233.205	0		0.199275	0.171918	0.169164	0.198352	0.177632	0.265555	0.206866	0.122517	0.124741	0.205721	0.203381	0.221377	0.215126	0.197352	0.330488	0.117453	0.0941519	0.323791	0.16462	0.744742	0.384428	-0.371283	-0.345332	0.376419	0.359918	0.482237	0.440909	0.316498	0	0	0	0	0	0
Synpcc7942_0373	637798779		hypothetical protein	chromosome	-	366738	368024	1	0.0943054	290.093	0		0.0767503	0.0597105	0.056026	0.0411499	0.062864	0.0589101	0.0569939	0.0749952	0.0836544	0.0999465	0.0940133	0.099816	0.148598	0.0474981	0.320958	-0.0412289	-0.133117	-0.578326	0.0330206	-0.0606989	-0.108406	0.287583	0.445227	0.701942	0.61365	0.700056	1.27413	-0.371344	0	0	0	0	0	0
Synpcc7942_0374	637798780		hypothetical protein	chromosome	-	368290	368574	0	0.269879	180.006	0		0.246128	0.153822	0.207156	0.194271	0.256961	0.217993	0.209231	0.314067	0.353306	0.474937	0.421769	0.412223	0.699992	0.17595	0.166342	-0.511807	-0.0823489	-0.174996	0.228485	-0.00878125	-0.0679688	0.518006	0.687853	1.11467	0.943389	0.910358	1.67427	-0.317899	0	0	0	0	0	0
Synpcc7942_0375	637798781	ymxG	processing protease	chromosome	-	368929	370344	1	0.203664	208.156	0		0.200176	0.110727	0.101502	0.118578	0.275834	0.249869	0.238511	0.122617	0.125264	0.148433	0.180391	0.164386	0.192307	0.182465	-0.45993	-1.31419	-1.43969	-1.21536	0.00260254	-0.140027	-0.207139	-1.16704	-1.13623	-0.891382	-0.610067	-0.744108	-0.517784	-0.59358	0	0	0	0	0	0
Synpcc7942_0376	637798782	pqqE	putative zinc protease protein	chromosome	-	370341	371867	1	0.340177	186.881	1	Dawn	0.54328	0.229675	0.225644	0.246323	0.668233	0.722011	0.566757	0.381014	0.603108	0.541765	0.710545	0.387563	0.462827	0.389694	-0.350601	-1.59271	-1.61825	-1.49174	-0.0519454	0.0597228	-0.289566	-0.862453	-0.19988	-0.354631	0.036628	-0.837866	-0.581825	-0.829955	0	0	0	0	0	0
Synpcc7942_0377	637798783	rpoD4	hypothetical protein	chromosome	-	371868	372206	1	0.404616	204.991	1	Dusk	2.55485	0.768307	0.82939	0.749165	3.26101	3.14974	2.48442	1.48402	3.92761	4.00275	4.25269	1.32308	1.26575	1.2186	-0.280903	-2.01439	-1.90402	-2.05079	0.0711789	0.0210903	-0.32123	-1.06463	0.339512	0.366851	0.454233	-1.23024	-1.29415	-1.34892	1	21	1	36	1	70
Synpcc7942_0378	637798784	ycf63	Protein of unknown function DUF140	chromosome	+	372532	373326	1	0.22834	331.093	1	Dusk	1.25239	0.847914	0.748112	0.678274	0.897494	1.24905	1.51143	0.676896	0.77553	1.00887	1.2474	1.39008	0.833416	0.952154	0.13391	-0.428783	-0.609446	-0.750832	-0.346799	0.130061	0.405142	-0.753766	-0.557519	-0.17803	0.128155	0.284394	-0.453665	-0.261506	1	21	1	36	1	70
Synpcc7942_0379	637798785		hypothetical protein	chromosome	+	373380	373763	0	0.101936	138.234	0		0.868629	0.784377	0.870821	0.75854	0.853669	1.05028	0.927609	0.780733	1.01862	0.838537	0.967928	0.91355	0.83301	0.823326	-0.291021	-0.438213	-0.287385	-0.486535	-0.316084	-0.0170639	-0.196244	-0.444932	-0.0612153	-0.341886	-0.134861	-0.218277	-0.351426	-0.368297	0	0	0	0	0	0
Synpcc7942_0380	637798786		hypothetical protein	chromosome	+	373785	374828	0	0.0619386	150.776	0		0.481986	0.453509	0.390296	0.40467	0.406187	0.507345	0.541354	0.464321	0.507467	0.440496	0.542362	0.499558	0.441692	0.450589	-0.00889478	-0.0967558	-0.313318	-0.261139	-0.255742	0.065082	0.158687	-0.0627642	0.0654295	-0.138758	0.161369	0.0427666	-0.134846	-0.106073	0	0	0	0	0	0
Synpcc7942_0381	637798787		hypothetical protein	chromosome	-	375032	375346	0	0.162424	287.802	0		6.63517	3.15347	2.86056	3.18868	6.9968	7.80905	6.23866	6.33359	11.0011	11.57	10.4513	5.12563	5.39945	4.98198	0.284125	-0.789067	-0.92971	-0.77305	0.360687	0.519139	0.195229	0.217016	1.01357	1.08631	0.939609	-0.0882785	-0.0131947	-0.129289	0	0	0	0	0	0
Synpcc7942_0382	637798788		hypothetical protein	chromosome	-	375456	375722	0	0.224074	288.927	0		7.8146	3.72039	3.08845	3.99408	9.01481	9.94649	7.71202	6.12923	10.8786	17.3215	10.6242	4.81958	5.41207	5.76314	0.42928	-0.641438	-0.910009	-0.539028	0.635405	0.777296	0.410218	0.0788151	0.906528	1.5776	0.872391	-0.267984	-0.10071	-0.0100364	0	0	0	0	0	0
Synpcc7942_0383	637798789		hypothetical protein	chromosome	-	375762	376448	1	0.632677	325.418	1	Dusk	2.37343	0.710946	0.781895	1.21239	4.2985	3.89939	2.78294	2.04932	4.08925	6.42232	4.12791	1.66934	1.61304	1.86721	0.533843	-1.20532	-1.06808	-0.435272	1.3907	1.25012	0.763479	0.322012	1.3187	1.96996	1.33228	0.0261459	-0.0233478	0.187757	0	0	0	0	0	0
Synpcc7942_0384	637798790		hypothetical protein	chromosome	-	376527	377237	0	0.181612	6.88497	0		0.231546	0.158136	0.202828	0.256471	0.298213	0.244371	0.285006	0.195663	0.159051	0.190376	0.192421	0.203844	0.187058	0.180687	0.370557	-0.17958	0.179516	0.51805	0.735601	0.448332	0.670249	0.127628	-0.171256	0.0881044	0.103524	0.186719	0.0627451	0.0127516	0	0	0	0	0	0
Synpcc7942_0385	637798791	chlP	geranylgeranyl reductase	chromosome	-	377321	378694	1	0.335864	140.199	1	Dawn	5.49338	1.84305	3.42308	4.75672	10.0544	7.72214	6.0137	7.00817	9.18869	6.35501	3.92876	2.71497	3.95771	4.66977	-0.246934	-1.82253	-0.929332	-0.45466	0.625124	0.244373	-0.116374	0.104412	0.495232	-0.036732	-0.730552	-1.26369	-0.719961	-0.481274	0	0	0	0	0	0
Synpcc7942_0386	637798792		hypothetical protein	chromosome	+	378981	380390	0	0.0631774	209.359	0		0.448251	0.41992	0.476722	0.510051	0.558962	0.539952	0.567004	0.456609	0.553175	0.469257	0.479538	0.418555	0.417578	0.43795	-0.197184	-0.291378	-0.108342	-0.0108498	0.121259	0.0713408	0.141868	-0.170533	0.106247	-0.131113	-0.0998443	-0.296075	-0.299444	-0.230725	0	0	0	0	0	0
Synpcc7942_0387	637798793		hypothetical protein	chromosome	+	380395	380901	1	0.0897224	106.292	0		0.307771	0.328578	0.30353	0.352544	0.302648	0.369699	0.442357	0.369046	0.404847	0.346572	0.38995	0.400642	0.331256	0.396569	-0.482003	-0.387628	-0.502024	-0.286059	-0.506221	-0.217511	0.041351	-0.220062	-0.0864863	-0.310708	-0.140574	-0.101548	-0.375913	-0.116288	0	0	0	0	0	0
Synpcc7942_0388	637798794	rfaG	probable glycosyltransferase	chromosome	-	380870	381991	1	0.272647	158.555	0		0.0682606	0.0510239	0.0629712	0.0498832	0.0422707	0.0412948	0.0517359	0.0619949	0.0524654	0.0659393	0.0620249	0.0973695	0.0562402	0.0468214	-0.362778	-0.78266	-0.47914	-0.815277	-1.05418	-1.08787	-0.762666	-0.501684	-0.742465	-0.412693	-0.500984	0.149638	-0.642231	-0.906663	0	0	0	0	0	0
Synpcc7942_0389	637798795		hypothetical protein	chromosome	+	382081	382332	0	0.131268	163.032	0		0.349369	0.302904	0.345664	0.284191	0.309985	0.263255	0.427191	0.361614	0.479487	0.453726	0.345198	0.494525	0.256181	0.286168	-0.513515	-0.719406	-0.528895	-0.811402	-0.686068	-0.921806	-0.223384	-0.463815	-0.0567742	-0.136445	-0.53084	-0.0122221	-0.9611	-0.801402	0	0	0	0	0	0
Synpcc7942_0390	637798796	chrA	Chromate transporter	chromosome	-	382303	383454	0	0.123274	295.015	0		0.38585	0.191617	0.141566	0.196426	0.549133	0.697442	0.551985	0.251351	0.60176	0.850944	0.929485	0.330251	0.320227	0.385545	0.277627	-0.732186	-1.16894	-0.696424	0.786743	1.13166	0.794215	-0.34071	0.918774	1.41865	1.54602	0.0531479	0.00867981	0.276487	0	0	0	0	0	0
Synpcc7942_0391	637798797		hypothetical protein	chromosome	-	383545	385125	1	0.634076	334.442	1	Dusk	1.20428	0.456383	0.397306	0.443845	2.02093	2.33716	1.65989	0.846503	2.38736	3.35014	3.34034	0.953176	0.960353	1.14546	0.219162	-1.1807	-1.38069	-1.22089	0.966005	1.17574	0.682072	-0.289427	1.2064	1.69521	1.69098	-0.1182	-0.107378	0.146917	0	0	0	0	0	0
Synpcc7942_0392	637798798	mltA	probable membrane-bound lytic transglycosylase A	chromosome	-	385350	386528	0	0.146517	250.995	0		0.105637	0.0870528	0.0751137	0.0602328	0.06389	0.0875283	0.110107	0.129429	0.0880326	0.151887	0.138846	0.170889	0.0753414	0.0781787	-0.262102	-0.541251	-0.754065	-1.07259	-0.987552	-0.533393	-0.202312	0.0309469	-0.525104	0.261785	0.132271	0.431849	-0.749699	-0.696366	0	0	0	0	0	0
Synpcc7942_0393	637798799		hypothetical protein	chromosome	+	386677	387357	0	0.129235	305.992	0		0.138741	0.13708	0.193288	0.175861	0.166941	0.137619	0.131733	0.178945	0.153546	0.137035	0.0987071	0.141882	0.121884	0.161297	-0.25822	-0.275599	0.22013	0.0838198	0.00872041	-0.269938	-0.333004	0.108899	-0.111946	-0.276077	-0.749394	-0.225924	-0.445115	-0.0409016	0	0	0	0	0	0
Synpcc7942_0394	637798800	cdsA	phosphatidate cytidylyltransferase	chromosome	-	387354	388220	1	0.287151	39.0549	0		0.359128	0.353949	0.391274	0.376223	0.465782	0.49068	0.578225	0.304123	0.306427	0.380121	0.484342	0.368525	0.402537	0.462706	-0.18111	-0.202066	-0.05743	-0.114023	0.194044	0.269173	0.506022	-0.420957	-0.410064	-0.0991509	0.250416	-0.143848	-0.0164873	0.184486	0	0	0	0	0	0
Synpcc7942_0395	637798801		hypothetical protein	chromosome	+	388494	389618	0	0.12502	129.131	0		0.637521	1.00492	1.14379	1.05973	0.722885	0.672996	0.632779	0.708404	0.884714	0.676318	0.66991	0.480669	0.775339	0.677525	-0.210621	0.445914	0.632661	0.522535	-0.0293292	-0.132497	-0.221394	-0.0585231	0.262117	-0.125393	-0.139126	-0.618049	0.0717333	-0.12282	1	22	0	0	1	72
Synpcc7942_0396	637798802	purH	bifunctional phosphoribosylaminoimidazolecarboxamide formyltransferase/IMP cyclohydrolase	chromosome	+	389953	391494	0	0.147357	168.713	0		0.299866	0.408055	0.480791	0.475756	0.33245	0.327105	0.329902	0.361572	0.337549	0.252981	0.244118	0.260253	0.368611	0.370108	-0.303693	0.140752	0.377398	0.362208	-0.154876	-0.178258	-0.165974	-0.0337287	-0.132913	-0.548981	-0.600436	-0.508097	-0.00591156	-6.57885e-05	0	0	0	0	0	0
Synpcc7942_0397	637798803	lim17	putative neutral invertase	chromosome	+	391532	392923	0	0.0888343	62.7657	0		0.17226	0.198966	0.219715	0.199309	0.148312	0.159617	0.185759	0.15572	0.120746	0.122606	0.150551	0.135275	0.175049	0.162281	-0.14258	0.0653507	0.208465	0.0678353	-0.358537	-0.252555	-0.0337396	-0.288211	-0.655193	-0.63314	-0.336919	-0.491274	-0.119407	-0.228678	0	0	0	0	0	0
Synpcc7942_0398	637798804		hypothetical protein	chromosome	+	392990	393448	0	0.15705	294.33	0		1.18361	3.02936	2.94364	2.38498	0.770403	0.605658	0.815128	1.2793	0.963554	0.624592	0.651262	1.49865	1.35995	1.00614	0.043592	1.39941	1.358	1.05438	-0.575916	-0.923027	-0.494503	0.155758	-0.253164	-0.878615	-0.818292	0.384065	0.243957	-0.190769	0	0	1	38	0	0
Synpcc7942_0399	637798805		hypothetical protein	chromosome	-	393793	394545	1	0.383517	160.031	1	Dawn	0.520913	0.550001	0.653594	0.683338	0.475166	0.493646	0.480052	0.784112	0.45671	0.379611	0.371779	0.78958	0.639459	0.549881	-0.222452	-0.144059	0.104901	0.169106	-0.355063	-0.300017	-0.340305	0.367565	-0.412216	-0.678973	-0.70905	0.377592	0.0733584	-0.144374	0	0	0	0	0	0
Synpcc7942_0400	637798806	trpG	anthranilate synthase, component II	chromosome	-	394579	395181	0	0.129997	110.578	0		0.574523	0.453317	0.527267	0.613794	0.719442	0.714236	0.71411	0.586604	0.765564	0.764043	0.877375	0.526227	0.554623	0.584499	-0.0481779	-0.390023	-0.17201	0.0472109	0.276336	0.265859	0.265604	-0.0181549	0.36598	0.363112	0.562651	-0.174857	-0.0990345	-0.0233414	0	0	0	0	0	0
Synpcc7942_0401	637798807	dgkA	diacylglycerol kinase	chromosome	-	395246	395731	1	0.18256	333.218	1	Dusk	0.871896	0.370367	0.364441	0.430931	0.861069	1.04652	1.23131	0.604671	1.13474	1.2386	1.78829	0.724077	0.520353	0.732091	-0.131491	-1.36669	-1.38996	-1.14819	-0.149519	0.131879	0.366481	-0.659497	0.248642	0.374993	0.904861	-0.399505	-0.876158	-0.383625	0	0	0	0	0	0
Synpcc7942_0402	637798808		hypothetical protein	chromosome	-	396872	397396	0	0.132846	113.086	0		0.314943	0.636589	0.550297	0.498649	0.370653	0.40115	0.346778	0.355366	0.296544	0.35871	0.38863	0.443373	0.459508	0.373876	-0.538998	0.476272	0.266121	0.123934	-0.30402	-0.189948	-0.400075	-0.364785	-0.625843	-0.351272	-0.235691	-0.0455684	0.00600107	-0.29153	0	0	0	0	0	0
Synpcc7942_0403	637798809		hypothetical protein	chromosome	-	397398	397577	1	0.161624	185.961	1	Dawn	0.691921	0.833804	0.825369	0.745585	0.588971	0.678612	0.665496	0.668023	0.654069	0.616533	0.716129	0.619136	0.647195	0.681876	-0.0901222	0.178979	0.16431	0.0176436	-0.322532	-0.118142	-0.146298	-0.140832	-0.171286	-0.256551	-0.0405084	-0.250471	-0.186529	-0.111219	0	0	0	0	0	0
Synpcc7942_0404	637798810	prfB	peptide chain release factor 2	chromosome	-	397595	398509	0	0.153714	103.547	0		0.286312	0.39513	0.410943	0.374903	0.30033	0.313028	0.33854	0.321759	0.276808	0.256353	0.24632	0.343192	0.342695	0.31421	-0.374247	0.0904933	0.147105	0.0146807	-0.305288	-0.245541	-0.132511	-0.205855	-0.422947	-0.533705	-0.591299	-0.112817	-0.11491	-0.240104	0	0	0	0	0	0
Synpcc7942_0405	637798811	holA	DNA polymerase III subunit delta	chromosome	+	398870	399868	0	0.137822	84.6257	0		0.147598	0.14404	0.125948	0.0951823	0.108215	0.100137	0.120437	0.10849	0.113198	0.113612	0.118741	0.125295	0.104465	0.104694	-0.0642527	-0.0994625	-0.293104	-0.697163	-0.512022	-0.623955	-0.357644	-0.508367	-0.447076	-0.441817	-0.378105	-0.300605	-0.562914	-0.559744	0	0	0	0	0	0
Synpcc7942_0406	637798812		hypothetical protein	chromosome	+	399953	400354	0	0.062187	90.8118	0		0.242154	0.329724	0.335862	0.293423	0.176969	0.225273	0.270417	0.24412	0.344889	0.26142	0.320655	0.314098	0.414156	0.234037	-0.287341	0.157991	0.184599	-0.0102841	-0.739772	-0.391596	-0.128083	-0.275675	0.222865	-0.176898	0.117754	0.0879452	0.486908	-0.336529	0	0	0	0	0	0
Synpcc7942_0407	637798813	psaK1, psaK2, psaK	photosystem I reaction center subunit X	chromosome	-	400429	400671	1	0.400735	232.311	1	Dusk	10.2359	0.220735	0.489904	1.59494	16.9889	14.7726	8.20442	7.39806	23.5745	22.8691	13.6424	2.73138	2.15132	3.15831	0.0770533	-5.45813	-4.30795	-2.60502	0.808	0.606332	-0.242117	-0.391371	1.28064	1.23681	0.491508	-1.82889	-2.1733	-1.61937	0	0	0	0	0	0
Synpcc7942_0408	637798814	trpF	N-(5 -phosphoribosyl)anthranilate isomerase	chromosome	+	400768	401421	0	0.0403676	241.802	0		0.116013	0.0946339	0.136891	0.108585	0.152504	0.173893	0.136364	0.11955	0.162254	0.147834	0.130594	0.0956951	0.109845	0.105885	-0.168847	-0.462708	0.0698948	-0.264315	0.22571	0.415063	0.0643312	-0.125525	0.315117	0.180843	0.00194891	-0.446619	-0.247668	-0.300636	0	0	0	0	0	0
Synpcc7942_0409	637798815		hypothetical protein	chromosome	-	401464	401748	0	0.201303	239.281	0		0.276266	0.320311	0.28017	0.259732	0.230041	0.254941	0.177754	0.26866	0.260903	0.35399	0.260831	0.285088	0.257175	0.263087	0.626332	0.839747	0.646575	0.537296	0.362167	0.510439	-0.00984607	0.586053	0.543787	0.983983	0.54339	0.671684	0.523023	0.555815	0	0	0	0	0	0
Synpcc7942_0410	637798816		hypothetical protein	chromosome	-	401750	402022	0	0.232378	246.121	0		0.461455	0.415627	0.439614	0.436483	0.337236	0.258433	0.293815	0.343673	0.26386	0.508132	0.324438	0.420287	0.373382	0.36387	0.631795	0.480893	0.561841	0.551529	0.179364	-0.204604	-0.0194895	0.206641	-0.174625	0.770807	0.123548	0.496981	0.326255	0.289026	0	0	0	0	0	0
Synpcc7942_0411	637798817	trpA	tryptophan synthase subunit alpha	chromosome	-	402191	402991	1	0.241596	146.799	1	Dawn	0.599611	0.922049	1.16179	1.21641	0.766255	0.588954	0.683844	0.909456	0.559885	0.438731	0.437369	0.686064	0.77627	0.811466	-0.351802	0.269014	0.602453	0.668726	0.00199533	-0.377673	-0.162161	0.249175	-0.450699	-0.802491	-0.806979	-0.157486	0.0207303	0.0847031	0	0	0	0	0	0
Synpcc7942_0412	637798818		hypothetical protein	chromosome	-	403022	403351	0	0.134965	61.4012	0		1.34914	1.30658	1.53538	1.5702	1.50484	1.71674	1.71904	1.78757	1.64065	1.15918	1.35877	1.76674	1.55033	1.84085	-0.162981	-0.209223	0.0235752	0.0559272	-0.00541166	0.184654	0.186589	0.24298	0.11925	-0.381908	-0.152717	0.226075	0.037554	0.285354	0	0	0	0	1	75
Synpcc7942_0413	637798819	ndhL	hypothetical protein	chromosome	-	403352	403768	0	0.169321	115.238	0		0.617939	0.63449	0.55472	0.620579	0.709174	0.744941	0.737777	0.606451	0.581381	0.770162	0.591691	0.755681	0.606454	0.697471	-0.0324739	0.00565748	-0.188179	-0.0263248	0.1662	0.237187	0.223245	-0.0595487	-0.120455	0.285223	-0.0950956	0.257838	-0.059541	0.142194	0	0	0	0	0	0
Synpcc7942_0414	637798820		hypothetical protein	chromosome	+	404016	405188	0	0.122541	204.466	0		0.234322	0.309541	0.32262	0.310913	0.197407	0.166077	0.226288	0.173761	0.153194	0.126862	0.138882	0.161467	0.242077	0.262607	-0.243556	0.158083	0.217787	0.164465	-0.490873	-0.740194	-0.293884	-0.674942	-0.856685	-1.12879	-0.998189	-0.780808	-0.196579	-0.0791406	0	0	0	0	0	0
Synpcc7942_0415	637798821		hypothetical protein	chromosome	-	405168	406145	0	0.165256	169.126	0		1.7814	0.142386	0.273633	0.479362	4.50999	3.38409	1.76172	1.29786	7.5737	5.99598	4.49747	0.58323	0.633794	0.653375	0.0140483	-3.63108	-2.68865	-1.87978	1.35416	0.939804	-0.00197834	-0.442832	2.10204	1.76503	1.35015	-1.59683	-1.47688	-1.43298	0	0	1	40	1	77
Synpcc7942_0416	637798822		hypothetical protein	chromosome	+	406389	406772	0	0.0900198	185.29	0		14.0397	1.23566	1.26653	1.82112	14.0365	11.6079	6.29812	5.6561	28.7997	34.6537	23.4692	7.18116	3.35479	6.35528	0.120843	-3.38532	-3.34971	-2.82577	0.120511	-0.153567	-1.03568	-1.19079	1.15738	1.42434	0.862094	-0.846383	-1.94438	-1.02264	0	0	1	40	1	77
Synpcc7942_0417	637798823		ATPase	chromosome	+	406851	408359	0	0.214671	316.961	0		5.02801	0.460044	0.400549	0.514077	4.57351	4.16253	2.22833	2.11396	10.6446	12.2761	10.5028	2.70128	1.3317	2.31542	0.215611	-3.23453	-3.43433	-3.07432	0.0789246	-0.0569165	-0.958416	-1.03443	1.29768	1.5034	1.27833	-0.680732	-1.7011	-0.903104	0	0	0	0	0	0
Synpcc7942_0418	637798824		hypothetical protein	chromosome	+	408494	408844	0	0.439259	200.845	0		40.1795	2.73453	0.994055	1.47968	27.0263	30.6065	12.229	8.28019	31.3198	103.488	111.92	22.9762	7.22977	9.84955	0.465106	-3.41199	-4.87188	-4.298	-0.10699	0.0724861	-1.25105	-1.81362	0.105723	1.83004	1.94304	-0.341216	-2.00933	-1.56322	0	0	0	0	0	0
Synpcc7942_0419	637798825	bioB	biotin synthase	chromosome	-	408941	409903	0	0.207083	171.922	0		0.549285	0.606802	0.718105	0.810547	0.554062	0.500813	0.593464	0.570567	0.511544	0.37191	0.373647	0.469747	0.555962	0.618918	-0.0181379	0.125533	0.368503	0.543204	-0.00564595	-0.151422	0.0934687	0.0367041	-0.120833	-0.580738	-0.574016	-0.243809	-0.000704902	0.154056	0	0	0	0	0	0
Synpcc7942_0420	637798826		hypothetical protein	chromosome	-	409951	411516	1	0.200917	296.255	0		0.28293	0.159732	0.161619	0.178701	0.347397	0.351679	0.286094	0.326075	0.44119	0.523978	0.467623	0.261523	0.237429	0.238484	0.271042	-0.553744	-0.536806	-0.391858	0.567183	0.584856	0.287086	0.475801	0.911999	1.1601	0.995944	0.157536	0.018093	0.0244935	0	0	0	0	0	0
Synpcc7942_0421	637798827		hypothetical protein	chromosome	-	411548	411946	1	0.218761	267.421	1	Dusk	0.721162	0.383908	0.443905	0.490202	0.821576	0.812856	0.712867	0.773004	1.20745	1.24107	1.27046	0.641174	0.700722	0.627196	0.286071	-0.623492	-0.414	-0.270875	0.474143	0.458749	0.26938	0.386225	1.02964	1.06926	1.10303	0.116464	0.244591	0.0846649	0	0	0	0	0	0
Synpcc7942_0422	637798828		hypothetical protein	chromosome	+	412147	413289	1	0.548684	340.739	1	Dusk	0.695741	0.266676	0.186713	0.220087	0.718823	1.01801	1.13852	0.369381	0.809116	1.52184	1.83625	0.58309	0.411504	0.540253	0.190017	-1.19344	-1.70771	-1.47046	0.237104	0.739148	0.900551	-0.723423	0.407814	1.31921	1.59016	-0.0648148	-0.567627	-0.174897	0	0	0	0	0	0
Synpcc7942_0423	637798829		hypothetical protein	chromosome	-	413396	413614	1	0.643269	12.628	1	Dusk	5.32096	1.98766	2.02411	2.09949	5.1466	7.04417	6.95175	2.87825	9.02587	10.3613	12.0031	4.25403	3.81446	4.78887	0.131611	-1.28901	-1.26279	-1.21004	0.0835437	0.536354	0.517301	-0.754881	0.893991	1.09306	1.30526	-0.191245	-0.348596	-0.0203893	1	23	1	41	1	79
Synpcc7942_0424	637798830	psbAI, psbA-I, psbA1, psbA	photosystem q(b) protein	chromosome	+	413873	414955	0	0.17701	272.917	0		53.9987	12.3724	13.6617	25.8509	67.2871	62.3235	42.4991	43.8957	70.5925	64.6335	47.9427	25.5672	29.7046	27.0765	0.401448	-1.72435	-1.58134	-0.661263	0.718852	0.608299	0.0559554	0.102601	0.788038	0.660804	0.229833	-0.677182	-0.46079	-0.594438	1	23	1	41	0	0
Synpcc7942_0425	637798831		hypothetical protein	chromosome	-	415064	415441	0	0.310696	124.549	0		1.05095	2.00708	1.21366	1.51728	1.0462	0.916516	0.9186	1.50922	1.76836	1.39231	0.947726	1.38118	2.21382	1.01833	0.113312	1.04672	0.320993	0.64311	0.10678	-0.0841448	-0.0808683	0.635426	0.864038	0.519108	-0.0358352	0.507528	1.18816	0.067827	0	0	0	0	0	0
Synpcc7942_0426	637798832	scpB	condensin subunit ScpB	chromosome	-	415535	416086	0	0.101862	116.634	0		0.202286	0.319544	0.303333	0.30636	0.266604	0.242271	0.20745	0.23444	0.249766	0.155352	0.141831	0.200898	0.233905	0.250902	-0.45756	0.20206	0.126947	0.141274	-0.0592563	-0.197334	-0.421191	-0.244737	-0.153376	-0.838416	-0.969776	-0.467492	-0.248033	-0.14683	0	0	0	0	0	0
Synpcc7942_0427	637798833		ATPase	chromosome	-	416103	416951	0	0.216112	112.713	0		0.295923	0.447716	0.35682	0.375693	0.328606	0.331161	0.310781	0.389959	0.38226	0.268359	0.271058	0.319435	0.32131	0.337511	-0.376521	0.220842	-0.106549	-0.0321906	-0.225386	-0.21421	-0.305845	0.0215805	-0.00718941	-0.517579	-0.503144	-0.266223	-0.257776	-0.186807	0	0	0	0	0	0
Synpcc7942_0428	637798834	leuA	putative alpha-isopropylmalate/homocitrate synthase family transferase	chromosome	-	416982	418610	0	0.136617	100.822	0		0.29967	0.325473	0.288456	0.287055	0.312126	0.365227	0.368649	0.2893	0.345198	0.362302	0.44177	0.327236	0.311083	0.326301	-0.115178	0.00398808	-0.170197	-0.177226	-0.0564244	0.170244	0.183698	-0.165982	0.0888725	0.158642	0.444746	0.0117801	-0.0612535	0.00765457	0	0	0	0	0	0
Synpcc7942_0429	637798835		hypothetical protein	chromosome	-	418681	419220	0	0.444722	345.189	0		4.47495	2.57304	1.84969	1.70069	3.20834	3.99952	2.86818	4.15792	6.22226	5.87575	5.15935	3.91103	2.99687	2.49491	0.464199	-0.334197	-0.810392	-0.931552	-0.0158446	0.302154	-0.177536	0.358188	0.939766	0.857099	0.669517	0.269876	-0.114216	-0.378687	0	0	0	0	0	0
Synpcc7942_0430	637798836	dxs	1-deoxy-D-xylulose-5-phosphate synthase	chromosome	+	419382	421292	0	0.12952	100.591	0		1.76604	1.47763	1.72047	1.73019	2.98257	2.597	1.93824	2.08602	4.43414	3.04483	2.63565	1.44558	1.73432	1.73413	-0.122901	-0.38013	-0.160617	-0.152493	0.633137	0.43343	0.0113262	0.117335	1.20523	0.662943	0.454737	-0.411768	-0.149049	-0.149208	0	0	0	0	0	0
Synpcc7942_0431	637798837		hypothetical protein	chromosome	+	421289	422557	0	0.0340414	43.3089	0		0.442779	0.462919	0.476303	0.449584	0.772764	0.621522	0.548083	0.503094	0.982691	0.645948	0.611965	0.430452	0.499549	0.516342	-0.146432	-0.0822594	-0.041142	-0.124428	0.657007	0.342784	0.161373	0.0378067	1.00372	0.398398	0.320428	-0.18717	0.0276047	0.0753065	0	0	0	0	0	0
Synpcc7942_0432	637798838		D-alanyl-D-alanine dipeptidase-like	chromosome	+	422547	423245	0	0.132054	50.5793	0		0.218113	0.205859	0.221541	0.173916	0.26841	0.259112	0.223464	0.153509	0.222726	0.221307	0.277182	0.245827	0.205547	0.261678	-0.160693	-0.244112	-0.138193	-0.487382	0.138666	0.0878051	-0.12573	-0.667444	-0.130498	-0.13972	0.185064	0.0118747	-0.246303	0.102021	0	0	0	0	0	0
Synpcc7942_0433	637798839		hypothetical protein	chromosome	+	423632	424840	0	0.256844	343.898	0		1.51504	0.103236	0.168114	0.263824	2.12874	1.9031	0.940182	0.758196	3.26607	3.85872	2.4987	0.497676	0.590585	0.49575	0.512578	-3.36275	-2.65926	-2.00913	1.00322	0.841574	-0.175765	-0.486134	1.62078	1.86135	1.2344	-1.0935	-0.846559	-1.09909	1	24	0	0	0	0
Synpcc7942_0434	637798840		hypothetical protein	chromosome	+	425057	426064	1	0.169617	235.759	0		0.296821	0.235364	0.233323	0.226876	0.252555	0.300862	0.32144	0.286188	0.305058	0.306932	0.310678	0.370349	0.288926	0.264848	0.00856558	-0.326134	-0.3387	-0.379129	-0.224434	0.0280745	0.123521	-0.0440643	0.0480543	0.0568893	0.0743923	0.327856	-0.0303284	-0.155866	0	0	0	0	0	0
Synpcc7942_0435	637798841		hypothetical protein	chromosome	+	426075	426830	0	0.133262	209.924	0		0.155275	0.159638	0.191395	0.180704	0.123625	0.107252	0.155659	0.213973	0.118847	0.116768	0.149586	0.244721	0.195186	0.171827	-0.316357	-0.276375	-0.0146261	-0.0975509	-0.645213	-0.850179	-0.312789	0.146244	-0.702075	-0.727542	-0.370208	0.339955	0.0136651	-0.170223	0	0	0	0	0	0
Synpcc7942_0436	637798842		hypothetical protein	chromosome	+	426845	427150	0	0.0599159	291.861	0		0.0725136	0.114612	0.112284	0.057035	0.0296309	0.058501	0.0672567	0.0704851	0.0202498	0.052202	0.0439343	0.105851	0.0935894	0.0577464	-0.24564	0.414796	0.385192	-0.592046	-1.53679	-0.555431	-0.354215	-0.286574	-2.08598	-0.719788	-0.968545	0.300065	0.122453	-0.574161	0	0	0	0	0	0
Synpcc7942_0437	637798843		putative glutathione peroxidase	chromosome	+	427463	428029	0	0.195412	230	0		0.162849	0.16737	0.103272	0.122062	0.12178	0.154146	0.142397	0.196855	0.211739	0.317311	0.205027	0.24109	0.215732	0.13982	0.659436	0.69894	0.00235284	0.243508	0.240172	0.580191	0.465816	0.93303	1.03819	1.6218	0.99171	1.22547	1.06513	0.439471	0	0	0	0	0	0
Synpcc7942_0438	637798844		hypothetical protein	chromosome	+	427989	428495	0	0.131576	188.801	0		0.115767	0.148521	0.110722	0.124637	0.0935457	0.128772	0.11137	0.163784	0.177216	0.273609	0.127903	0.193824	0.202009	0.142237	0.445166	0.804608	0.380876	0.551669	0.137683	0.598753	0.3893	0.945734	1.05945	1.68606	0.588995	1.18869	1.24836	0.742241	0	0	0	0	0	0
Synpcc7942_0439	637798845	chlM, bchM	Mg-protoporphyrin IX methyl transferase	chromosome	-	428611	429300	1	0.335951	136.808	1	Dawn	0.714742	0.988156	1.11935	1.19666	0.78945	0.734061	0.728847	0.888526	0.62638	0.436203	0.346126	0.777335	0.785075	0.850644	-0.356015	0.111301	0.291151	0.387499	-0.21259	-0.317539	-0.327823	-0.0420245	-0.546401	-1.06844	-1.40214	-0.234902	-0.220607	-0.104883	0	0	0	0	0	0
Synpcc7942_0440	637798846	nagA	N-acetylglucosamine 6-phosphate deacetylase	chromosome	-	429346	430473	0	0.0674017	18.5159	0		0.368677	0.334235	0.329484	0.308911	0.353061	0.403284	0.462679	0.335095	0.414744	0.368936	0.437474	0.420501	0.337367	0.334051	-0.256786	-0.398283	-0.418937	-0.511951	-0.319227	-0.12735	0.0708661	-0.394575	-0.0869227	-0.255775	-0.00994873	-0.0670341	-0.384824	-0.399076	0	0	0	0	0	0
Synpcc7942_0441	637798847	purE	phosphoribosylaminoimidazole carboxylase, catalytic subunit	chromosome	+	430523	431191	0	0.107776	162.512	0		0.190447	0.285246	0.250283	0.215899	0.138659	0.162124	0.191678	0.232933	0.0937803	0.120642	0.125301	0.301984	0.23508	0.218444	-0.753993	-0.171175	-0.359817	-0.573026	-1.21184	-0.986283	-0.744694	-0.463466	-1.77602	-1.41264	-1.35798	-0.0889057	-0.45023	-0.556116	0	0	0	0	0	0
Synpcc7942_0442	637798848	amt1, amt	ammonium transporter	chromosome	+	431458	432951	1	0.391048	141.515	1	Dawn	12.2253	12.277	11.5288	10.2845	12.4125	13.6413	15.1385	18.196	17.933	12.8563	9.03194	21.466	17.8599	8.69839	-0.398786	-0.392698	-0.48341	-0.648185	-0.376863	-0.240669	-0.0904266	0.174972	0.153963	-0.326182	-0.835544	0.413402	0.148073	-0.889832	0	0	0	0	0	0
Synpcc7942_0443	637798849		hypothetical protein	chromosome	-	433076	434317	0	0.141388	230.261	0		0.259341	0.248742	0.35496	0.286857	0.285837	0.214504	0.213717	0.605201	0.821328	0.871188	0.84685	0.640928	0.773429	0.361837	0.257878	0.197678	0.710685	0.403359	0.398225	-0.015967	-0.0212695	1.48045	1.92099	2.00601	1.96514	1.56319	1.8343	0.73837	0	0	0	0	0	0
Synpcc7942_0444	637798850		hypothetical protein	chromosome	-	434357	435040	0	0.23559	210.665	0		0.224989	0.202833	0.35375	0.258676	0.247784	0.175503	0.137327	0.571532	0.745113	0.692002	0.63936	0.553001	0.710353	0.280682	0.373284	0.223723	1.02616	0.574573	0.51251	0.014924	-0.338956	1.71826	2.10089	1.9942	1.88006	1.67071	2.03196	0.692365	0	0	0	0	0	0
Synpcc7942_0445	637798851	oppC	ABC-type dipeptide/oligopeptide/nickel transport systems permease components-like	chromosome	-	435383	436438	0	0.0886277	117.683	0		0.155899	0.176314	0.24334	0.216563	0.198804	0.190461	0.184397	0.179226	0.184104	0.168782	0.147529	0.150764	0.15996	0.178188	-0.223428	-0.0458932	0.418931	0.250747	0.127308	0.0654541	0.0187788	-0.0222563	0.0164785	-0.108876	-0.303037	-0.27175	-0.186328	-0.0306433	0	0	0	0	0	0
Synpcc7942_0446	637798852	rpsN, rps14	30S ribosomal protein S14	chromosome	-	436519	436821	0	0.36559	266.704	0		9.7209	15.3535	20.004	18.4498	11.1572	9.40766	9.79653	11.1686	7.53083	5.96278	5.63751	5.64751	10.2029	10.212	-0.169931	0.489474	0.871197	0.754509	0.0288754	-0.217185	-0.158751	0.0303563	-0.538213	-0.875037	-0.955963	-0.953407	-0.10011	-0.0988294	0	0	0	0	1	81
Synpcc7942_0447	637798853	nth	DNA-(apurinic or apyrimidinic site) lyase / endonuclease III	chromosome	-	436851	437537	1	0.142651	48.7405	0		0.394877	0.523262	0.485338	0.437128	0.339088	0.476694	0.520025	0.379096	0.379949	0.351221	0.529514	0.483461	0.605509	0.513032	0.00496001	0.41109	0.302547	0.151611	-0.214783	0.27662	0.402138	-0.0538805	-0.0506366	-0.164066	0.428225	0.296956	0.621704	0.382606	0	0	0	0	0	0
Synpcc7942_0448	637798854		YUP8H12.25 {{Arabidopsis thaliana}}-type protein. Metallo peptidase. MEROPS family M50B	chromosome	-	437534	438628	1	0.078671	13.4268	0		1.34266	1.381	1.31258	1.18989	1.50767	1.83485	1.59517	1.30002	2.18856	2.25192	2.32623	1.38726	1.62996	1.56402	-0.0222968	0.0183216	-0.0549889	-0.196557	0.144933	0.428271	0.226318	-0.0688609	0.682593	0.723765	0.770605	0.0248482	0.257443	0.197865	0	0	0	0	0	0
Synpcc7942_0449	637798855	serS	seryl-tRNA synthetase	chromosome	-	438675	440006	0	0.167509	156.883	0		0.555106	0.747302	0.830528	0.83902	0.600596	0.600031	0.583171	0.764287	0.576846	0.481587	0.517119	0.551873	0.677805	0.653982	-0.269317	0.159613	0.311949	0.326626	-0.155685	-0.157042	-0.19816	0.192036	-0.213893	-0.474281	-0.371583	-0.277743	0.0187918	-0.0328288	0	0	0	0	0	0
Synpcc7942_0450	637798856	nifU	putative NifU-like protein	chromosome	-	440050	440295	0	0.263693	180.574	0		2.38011	2.06512	1.93178	1.71493	2.12075	1.99046	2.0336	2.18534	4.10892	2.89128	3.89944	2.76949	2.60851	2.11028	-0.190295	-0.395102	-0.491392	-0.663172	-0.356751	-0.448222	-0.417289	-0.313468	0.597435	0.090383	0.521941	0.0282941	-0.0580989	-0.363893	0	0	0	0	0	0
Synpcc7942_0451	637798857		esterase	chromosome	+	440670	441299	0	0.0860307	208.017	0		0.154518	0.141628	0.112917	0.144245	0.230274	0.200575	0.223647	0.166899	0.245891	0.242877	0.316327	0.219595	0.19724	0.14479	-0.432957	-0.558622	-0.885466	-0.532206	0.142626	-0.0565861	0.100496	-0.321755	0.237289	0.219496	0.600689	0.0741187	-0.0807734	-0.526768	0	0	0	0	0	0
Synpcc7942_0452	637798858		hypothetical protein	chromosome	-	441357	441836	0	0.199639	42.7004	0		16.375	5.39823	7.38295	7.44247	14.8909	13.4106	11.0928	9.3643	22.3863	19.2194	16.2118	4.37818	6.94824	7.67907	0.0689868	-1.53194	-1.08023	-1.06865	-0.0680738	-0.219127	-0.492877	-0.737261	0.52011	0.300056	0.0545368	-1.8341	-1.16778	-1.0235	0	0	1	42	1	82
Synpcc7942_0453	637798860		GAF sensor signal transduction histidine kinase	chromosome	+	442022	443236	0	0.082772	267.215	0		0.301629	0.196963	0.219859	0.215465	0.359353	0.291205	0.330088	0.213909	0.407996	0.362585	0.354729	0.22818	0.210938	0.25235	-0.0264093	-0.641259	-0.482604	-0.511728	0.226216	-0.0771488	0.103666	-0.522186	0.409372	0.239135	0.207532	-0.429011	-0.542369	-0.283757	0	0	0	0	0	0
Synpcc7942_0454	637798861	cobS	cobalamin synthase	chromosome	-	443217	443972	0	0.0691065	252.908	0		0.0426059	0.0416151	0.0633717	0.0517435	0.0332127	0.0306434	0.0530498	0.0385151	0.0307363	0.0400346	0.0240593	0.045749	0.0385235	0.0385348	-0.275207	-0.309154	0.297577	0.00511676	-0.634529	-0.750686	0.0410866	-0.420839	-0.746317	-0.365015	-1.09967	-0.172522	-0.420523	-0.4201	0	0	0	0	0	0
Synpcc7942_0455	637798862	tgt	queuine tRNA-ribosyltransferase	chromosome	+	444001	445155	0	0.0616686	226.248	0		0.145015	0.160755	0.201952	0.234995	0.152778	0.129462	0.180928	0.198411	0.119369	0.0858924	0.0924332	0.145921	0.152973	0.155885	-0.144716	0.00394196	0.33309	0.551712	-0.0694805	-0.30839	0.174496	0.307573	-0.425495	-0.900317	-0.794436	-0.135727	-0.0676396	-0.0404373	0	0	0	0	0	0
Synpcc7942_0456	637798863	psbK	photosystem II reaction center protein PsbK precursor	chromosome	+	445209	445346	0	0.276455	280.018	0		26.0637	6.30865	9.20869	15.1937	26.1196	22.4339	19.4907	15.051	34.0804	29.3219	21.2661	11.0355	12.1314	15.414	0.179097	-1.86754	-1.32188	-0.599472	0.182186	-0.0372671	-0.240158	-0.613084	0.565998	0.349031	-0.114389	-1.0608	-0.924202	-0.578702	0	0	0	0	1	84
Synpcc7942_0457	637798864		hypothetical protein	chromosome	+	445562	446179	0	0.171285	61.4456	0		0.171417	0.118507	0.122157	0.112962	0.235874	0.212989	0.198103	0.149199	0.174212	0.201339	0.163794	0.174113	0.156301	0.185467	0.00265838	-0.529878	-0.486112	-0.599005	0.463171	0.315932	0.211406	-0.197608	0.0259988	0.234779	-0.0629658	0.0251734	-0.130524	0.116318	0	0	0	0	0	0
Synpcc7942_0458	637798865	fghA	Carboxylesterase	chromosome	-	446215	447051	1	0.212419	19.3353	0		0.307007	0.414699	0.501853	0.468799	0.334984	0.391265	0.45205	0.295696	0.219319	0.209931	0.284392	0.275478	0.428564	0.373162	-0.145843	0.28795	0.56315	0.464855	-0.0200244	0.204031	0.412366	-0.199998	-0.631087	-0.694203	-0.256234	-0.302179	0.335394	0.135687	0	0	0	0	0	0
Synpcc7942_0459	637798866		glutathione-dependent formaldehyde dehydrogenase	chromosome	-	447057	448166	0	0.133225	351.462	0		0.506205	0.630987	0.771235	0.765013	0.569911	0.582481	0.675559	0.558642	0.416585	0.387037	0.470928	0.502002	0.679554	0.656563	-0.0930549	0.224834	0.514396	0.502708	0.0779616	0.109434	0.323307	0.0491486	-0.374164	-0.480303	-0.197268	-0.105081	0.331814	0.282158	0	0	0	0	0	0
Synpcc7942_0460	637798867		putative acetyltransferase	chromosome	-	448306	448779	0	0.0796394	283.315	0		0.0875849	0.0903115	0.0755502	0.0685615	0.0912297	0.0577605	0.0745914	0.0682546	0.0669974	0.0851369	0.0900932	0.0961308	0.0839715	0.0675059	0.360613	0.404841	0.147367	0.00732896	0.419435	-0.239985	0.128941	0.000856831	-0.0259632	0.319715	0.401349	0.49493	0.29983	-0.0150561	0	0	0	0	0	0
Synpcc7942_0461	637798868		hypothetical protein	chromosome	-	448876	449313	0	0.0775051	192.944	0		0.343182	0.228439	0.203295	0.252818	0.35351	0.34139	0.320479	0.289303	0.410267	0.462592	0.462213	0.354711	0.28481	0.273681	0.321693	-0.26547	-0.433709	-0.119181	0.36447	0.314138	0.22295	0.0752989	0.579281	0.752458	0.751277	0.369365	0.0527187	-0.00478604	0	0	0	0	0	0
Synpcc7942_0462	637798869		hypothetical protein	chromosome	-	449370	449957	1	0.0918367	244.527	0		0.329892	0.31226	0.447717	0.398141	0.475653	0.442339	0.348214	0.364059	0.496611	0.534748	0.450551	0.296902	0.333503	0.357372	0.209078	0.129832	0.649673	0.480365	0.736994	0.632239	0.287061	0.351258	0.799202	0.905944	0.658775	0.0570703	0.224787	0.324511	0	0	0	0	0	0
Synpcc7942_0463	637798870		protein tyrosine phosphatase	chromosome	-	449957	450448	0	0.0495992	355.172	0		0.375348	0.463341	0.608846	0.60671	0.40969	0.331744	0.461207	0.488797	0.253462	0.312709	0.326293	0.418436	0.408443	0.490198	-0.066598	0.237247	0.631251	0.62618	0.0597069	-0.244758	0.230587	0.314409	-0.633056	-0.330005	-0.26866	0.0901801	0.0553081	0.318537	0	0	0	0	0	0
Synpcc7942_0464	637798871		hypothetical protein	chromosome	-	450539	450934	0	0.301257	167.794	0		5.1171	6.38181	7.09519	7.24764	5.28912	4.49926	4.73337	6.13285	4.37937	3.65801	2.81779	4.35447	4.67745	5.42221	-0.112972	0.205668	0.358542	0.389213	-0.0652723	-0.298611	-0.225432	0.148258	-0.337576	-0.59724	-0.973736	-0.345801	-0.242576	-0.0294186	0	0	0	0	0	0
Synpcc7942_0465	637798872		hypothetical protein	chromosome	-	451023	451748	1	1.03986	187.33	1	Dawn	0.316481	0.20957	0.241965	0.261948	0.211353	0.205962	0.222422	0.349819	0.425685	0.491003	0.392141	0.27525	0.207931	0.146036	-0.57639	-1.17108	-0.963712	-0.849229	-1.15885	-1.19613	-1.08521	-0.431902	-0.148721	0.0572223	-0.267137	-0.777766	-1.1824	-1.69218	0	0	0	0	0	0
Synpcc7942_0466	637798873		Cellulose synthase (UDP-forming)	chromosome	+	451838	454087	1	0.584359	177.883	1	Dawn	0.237321	0.187506	0.220027	0.175998	0.141353	0.169419	0.140722	0.213767	0.17832	0.160299	0.176792	0.313777	0.198905	0.121411	-0.581205	-0.92111	-0.690365	-1.01248	-1.32874	-1.06745	-1.3352	-0.732003	-0.993576	-1.14728	-1.00599	-0.178303	-0.835968	-1.54814	0	0	0	0	0	0
Synpcc7942_0467	637798874		Peptidase, metallopeptidase	chromosome	-	454004	454837	0	0.0897522	312.918	0		0.791306	0.99626	1.07811	1.00159	0.913229	0.909081	0.997201	0.903211	0.788486	0.617944	0.866675	0.934069	1.01619	1.0422	-0.155104	0.177183	0.291089	0.184874	0.0516364	0.0450689	0.178544	0.0357232	-0.160254	-0.511863	-0.0238477	0.0841902	0.205757	0.242218	0	0	0	0	0	0
Synpcc7942_0468	637798875	secG, ycf47	preprotein translocase subunit SecG	chromosome	-	454806	455045	0	0.105725	283.467	0		1.68507	1.74067	1.97	1.76533	1.60998	1.79891	1.70845	1.78838	2.21394	1.70247	1.82218	1.58063	1.86068	1.83669	-0.372029	-0.325188	-0.14664	-0.304895	-0.437787	-0.277713	-0.352145	-0.286177	0.0217817	-0.357202	-0.259171	-0.464335	-0.228999	-0.247726	0	0	0	0	0	0
Synpcc7942_0469	637798876	yibO, pgm, gpmI	phosphoglyceromutase	chromosome	-	455066	456664	1	0.505609	149.321	1	Dawn	1.20505	1.06376	1.4306	1.37526	0.966158	1.0787	1.12406	1.41699	1.61402	1.13096	1.1385	0.93352	1.29955	1.28758	-0.474393	-0.65431	-0.226865	-0.283785	-0.793158	-0.634193	-0.574773	-0.240661	-0.0528299	-0.565943	-0.556354	-0.842736	-0.365477	-0.378826	1	26	1	43	1	86
Synpcc7942_0470	637798877		hypothetical protein	chromosome	+	457211	457744	0	0.0971789	290.167	0		1.08975	0.351563	0.228371	0.290766	0.895995	1.05105	0.974379	0.938066	1.47224	1.48623	1.47501	1.51846	0.630833	0.67344	0.218646	-1.4135	-2.0359	-1.68743	-0.0637939	0.16647	0.0571982	0.00240378	0.652652	0.666299	0.655366	0.697247	-0.570027	-0.475736	1	26	1	43	1	86
Synpcc7942_0471	637798878	lacG	ABC-type sugar transport system permease component-like	chromosome	+	457882	458712	1	0.204806	196.16	0		0.462544	0.27991	0.274285	0.29765	0.37601	0.361144	0.397526	0.457453	0.474427	0.444138	0.38161	0.537097	0.333527	0.380454	-0.00875579	-0.733381	-0.76267	-0.64473	-0.307573	-0.365773	-0.227296	-0.0247204	0.0278405	-0.067336	-0.286246	0.206836	-0.480541	-0.290624	0	0	0	0	0	0
Synpcc7942_0472	637798879		Exodeoxyribonuclease VII small subunit	chromosome	+	458795	459019	0	0.0671505	294.213	0		0.235412	0.236101	0.208627	0.181883	0.20459	0.271445	0.253299	0.242046	0.23753	0.298925	0.330386	0.278154	0.228675	0.159193	-0.0929644	-0.0887477	-0.267224	-0.465146	-0.295417	0.112506	0.0126893	-0.0528721	-0.0800406	0.251631	0.396	0.147731	-0.134851	-0.657376	0	0	0	0	0	0
Synpcc7942_0473	637798880		NADH:flavin oxidoreductase Old Yellow Enzyme family-like	chromosome	+	459096	460202	1	0.483098	175.319	1	Dawn	0.819235	0.836762	0.823161	0.91224	0.790083	0.786672	0.705515	1.24452	1.38538	1.34501	1.30589	1.06574	1.07427	0.999593	-0.413845	-0.383305	-0.406948	-0.25871	-0.466118	-0.47236	-0.629445	0.189396	0.344091	0.301423	0.258833	-0.0343378	-0.0228337	-0.126781	0	0	0	0	0	0
Synpcc7942_0474	637798881		hypothetical protein	chromosome	-	460296	460433	0	0.246043	48.8179	0		9.29995	6.82441	7.70079	8.55627	9.85549	8.57676	8.84864	8.55314	9.63143	9.01649	8.1947	5.88372	6.5845	8.32302	-0.0895285	-0.536048	-0.361745	-0.20977	-0.00582333	-0.206319	-0.161296	-0.210298	-0.0390017	-0.134186	-0.27206	-0.750023	-0.587677	-0.249644	0	0	0	0	0	0
Synpcc7942_0475	637798882	petN	cytochrome b6-f complex subunit VIII	chromosome	-	460449	460544	0	0.134805	230.508	0		3.19119	1.89647	1.94076	2.10636	2.5937	3.0384	2.42415	1.78614	2.73515	2.33827	2.38069	1.95577	2.60395	2.38789	-0.158101	-0.908874	-0.875573	-0.757442	-0.457182	-0.228883	-0.554714	-0.995351	-0.380574	-0.606752	-0.580813	-0.864457	-0.451493	-0.576455	0	0	0	0	1	87
Synpcc7942_0476	637798883	clpS	ATP-dependent Clp protease adaptor	chromosome	+	460552	460962	1	0.468035	27.9314	0		0.294323	0.317484	0.268457	0.25332	0.296974	0.394562	0.440397	0.166618	0.175264	0.331381	0.436778	0.32592	0.262185	0.306766	-0.0184065	0.0908771	-0.151115	-0.234848	-0.00546832	0.404444	0.562998	-0.839267	-0.766274	0.152685	0.551092	0.12871	-0.185224	0.0413308	0	0	0	0	0	0
Synpcc7942_0477	637798884	ylmG, ycf19	conserved hypothetical protein YCF19	chromosome	-	460994	461293	1	0.327423	28.1483	1	Dusk	2.57442	2.13179	2.19865	2.03815	2.4946	2.69222	2.97099	2.27367	3.09306	3.5871	3.49805	2.12641	2.34123	2.68081	0.293161	0.0209762	0.0655332	-0.0438236	0.247723	0.357708	0.499855	0.113938	0.557947	0.771731	0.735464	0.0173352	0.156178	0.351581	0	0	0	0	0	0
Synpcc7942_0478	637798885	lepB	thylakoidal processing peptidase. Serine peptidase. MEROPS family S26A	chromosome	-	461324	461935	0	0.073299	101.532	0		0.46783	0.653121	0.717196	0.5733	0.372666	0.505862	0.393193	0.44758	0.379684	0.368161	0.36052	0.4243	0.621815	0.461972	-0.0333558	0.44801	0.583028	0.259949	-0.361459	0.0794034	-0.284102	-0.0971931	-0.334541	-0.379002	-0.409261	-0.174257	0.377144	-0.051536	0	0	0	0	0	0
Synpcc7942_0479	637798886	lepA	GTP-binding protein LepA	chromosome	-	461935	463749	0	0.115567	146.118	0		0.526877	0.669203	0.723361	0.647575	0.581798	0.541304	0.541081	0.577832	0.603428	0.520648	0.51719	0.460363	0.615905	0.5752	-0.0452128	0.299764	0.412037	0.252369	0.0978389	-0.00624079	-0.00683521	0.0879715	0.150502	-0.0623699	-0.0719837	-0.239906	0.180028	0.0813832	0	0	0	0	0	0
Synpcc7942_0480	637798887		GAF sensor signal transduction histidine kinase	chromosome	+	463901	465634	0	0.290771	286.449	0		0.676152	0.206123	0.118331	0.131192	0.619031	0.66679	0.433973	0.320604	0.814311	1.11273	0.898905	0.391953	0.246057	0.214277	0.878398	-0.835441	-1.63612	-1.48727	0.751062	0.858284	0.238656	-0.198159	1.14663	1.59708	1.28922	0.0917325	-0.579956	-0.779473	0	0	0	0	0	0
Synpcc7942_0481	637798888		protease	chromosome	+	465713	466828	0	0.336083	282.541	0		0.738228	0.45013	0.312213	0.331647	0.670592	0.755796	0.527706	0.648406	0.884909	1.11419	0.847507	0.644913	0.56847	0.451902	0.741464	0.0277393	-0.500074	-0.412956	0.602833	0.775393	0.257133	0.554295	1.00293	1.33532	0.940623	0.546502	0.364482	0.0334086	0	0	0	0	0	0
Synpcc7942_0482	637798889		Peptidoglycan glycosyltransferase	chromosome	-	467004	468773	1	0.555843	210.377	1	Dusk	0.679789	0.457769	0.340118	0.380471	0.295142	0.334348	0.35896	0.653146	0.522497	0.683031	0.598698	0.852017	0.425887	0.332416	0.195861	-0.374606	-0.803191	-0.641439	-1.00781	-0.827873	-0.725403	0.138181	-0.183803	0.202726	0.0126039	0.521657	-0.478754	-0.836233	0	0	0	0	0	0
Synpcc7942_0483	637798890		hypothetical protein	chromosome	-	468776	469219	1	0.651527	206.374	1	Dusk	1.74915	1.33121	1.08666	1.24023	0.793289	0.910719	0.92824	2.25643	1.6782	2.12075	1.6226	2.53103	1.32172	1.09284	0.100026	-0.293892	-0.586722	-0.396016	-1.04071	-0.841548	-0.814055	0.467416	0.0402927	0.377951	-0.00831665	0.633101	-0.304208	-0.578546	1	27	0	0	0	0
Synpcc7942_0484	637798891		hypothetical protein	chromosome	-	469432	470874	1	0.324902	135.272	0		0.30903	0.345266	0.463137	0.529666	0.348975	0.344439	0.350707	0.498854	0.416532	0.22431	0.158931	0.317675	0.317206	0.37829	-0.484771	-0.32481	0.0989195	0.292563	-0.309398	-0.328273	-0.302253	0.206099	-0.0540936	-0.947024	-1.44412	-0.444968	-0.447099	-0.193027	0	0	0	0	0	0
Synpcc7942_0485	637798892	gpmB, cobC	phosphoglycerate mutase	chromosome	+	470975	472312	1	0.356016	140.449	0		0.362705	0.589379	0.82391	0.89418	0.370626	0.322674	0.399527	0.640767	0.298708	0.197929	0.129439	0.340553	0.411389	0.417614	-0.50366	0.196741	0.680032	0.79811	-0.472489	-0.672378	-0.364163	0.317344	-0.783721	-1.37747	-1.99019	-0.594575	-0.32195	-0.300286	0	0	0	0	0	0
Synpcc7942_0486	637798893	pyrC	dihydroorotase	chromosome	+	472319	473554	1	0.278545	125.019	0		0.250175	0.411435	0.564584	0.614964	0.239824	0.223213	0.242079	0.352058	0.152279	0.0911467	0.0953332	0.222527	0.289038	0.253086	-0.391764	0.325962	0.782485	0.905797	-0.452726	-0.556285	-0.439227	0.101108	-1.10799	-1.84844	-1.78365	-0.560726	-0.183443	-0.375077	0	0	0	0	0	0
Synpcc7942_0487	637798894	lepB	thylakoidal processing peptidase. Serine peptidase. MEROPS family S26A	chromosome	-	473510	474172	0	0.177268	257.334	0		0.598103	0.390511	0.378093	0.359456	0.431314	0.52095	0.604912	0.496107	0.561932	0.651785	0.69778	0.780838	0.629624	0.591391	-0.0799749	-0.695004	-0.741628	-0.814551	-0.55163	-0.279222	-0.0636419	-0.349717	-0.169971	0.0440284	0.142405	0.304655	-0.00587779	-0.096256	0	0	0	0	0	0
Synpcc7942_0488	637798895		dihydroorotase	chromosome	+	474316	475644	0	0.296607	28.7994	0		0.661921	0.347717	0.321163	0.330569	0.619795	0.725783	0.859657	0.430882	0.713943	0.800873	1.04609	0.632431	0.528494	0.618085	0.151274	-0.777471	-0.892079	-0.850433	0.0564045	0.284152	0.528376	-0.468093	0.260423	0.426187	0.811553	0.0855218	-0.1735	0.0524202	0	0	0	0	0	0
Synpcc7942_0489	637798896	aldA	aldehyde dehydrogenase	chromosome	-	475665	477044	1	0.135065	186.885	0		0.272308	0.296372	0.287552	0.284773	0.393209	0.347191	0.305534	0.363772	0.397381	0.402696	0.370767	0.365196	0.339074	0.325307	-0.0970687	0.0251043	-0.0184811	-0.0324937	0.432991	0.253424	0.069029	0.320729	0.448216	0.467385	0.348209	0.326367	0.219293	0.159497	0	0	0	0	0	0
Synpcc7942_0490	637798897		diguanylate cyclase with PAS/PAC sensor	chromosome	+	477395	479440	1	0.121917	3.36264	0		0.543657	0.46786	0.354077	0.363561	0.585312	0.592387	0.636549	0.433003	0.696191	0.833741	0.743276	0.49264	0.663802	0.688824	0.571208	0.354587	-0.0474235	-0.00929071	0.677718	0.695052	0.798783	0.242888	0.927995	1.18811	1.02241	0.429046	0.859264	0.912648	0	0	0	0	0	0
Synpcc7942_0491	637798898		hypothetical protein	chromosome	+	479700	479837	1	0.462354	15.3677	1	Dusk	0.560176	0.186868	0.241965	0.383767	1.0462	1.17511	0.978934	0.382918	1.38634	0.706698	1.35241	0.429643	0.675334	0.650614	-0.0727417	-1.6566	-1.28382	-0.618388	0.828464	0.9961	0.73259	-0.621585	1.23459	0.262473	1.19884	-0.455483	0.19698	0.143182	1	28	1	45	0	0
Synpcc7942_0492	637798899	ribF	bifunctional riboflavin kinase/FMN adenylyltransferase	chromosome	-	479877	480824	1	0.135733	53.424	0		0.160069	0.578864	0.525278	0.36947	0.0875511	0.103302	0.195385	0.147316	0.0710826	0.0682869	0.0959325	0.271019	0.23809	0.382365	-0.353305	1.50123	1.36108	0.853459	-1.2238	-0.985124	-0.0656787	-0.473083	-1.52443	-1.58232	-1.09191	0.406398	0.219508	0.902953	0	0	0	0	0	0
Synpcc7942_0493	637798900		hypothetical protein	chromosome	+	480967	482451	1	0.533799	359.522	0		0.248715	0.133714	0.146971	0.171832	0.328302	0.376534	0.412926	0.175017	0.309301	0.37309	0.457449	0.310539	0.255282	0.292979	0.13876	-0.756583	-0.620203	-0.394738	0.539288	0.737044	0.870146	-0.368244	0.453273	0.723788	1.01788	0.459037	0.176358	0.375062	0	0	0	0	0	0
Synpcc7942_0494	637798901		hypothetical protein	chromosome	-	482631	482984	0	0.0953913	287.559	0		0.754197	0.461848	0.332189	0.35871	0.539846	0.693088	0.609695	0.670206	1.15965	1.29909	1.26888	0.927386	0.695186	0.647564	0.262	-0.445523	-0.920938	-0.810123	-0.220393	0.140098	-0.044855	0.0916623	0.88267	1.04649	1.01254	0.560229	0.144457	0.0420816	0	0	0	0	0	0
Synpcc7942_0495	637798902		hypothetical protein	chromosome	-	482981	483517	0	0.0666408	228.2	0		1.18097	0.853829	0.565035	0.619748	0.842934	1.12753	1.03379	1.15976	2.04096	2.20593	2.26053	1.55291	1.15067	1.10101	0.0137682	-0.454186	-1.04979	-0.91645	-0.472714	-0.0530335	-0.178256	-0.0123834	0.803044	0.915182	0.950457	0.40877	-0.0237316	-0.0873765	0	0	0	0	0	0
Synpcc7942_0496	637798903		hypothetical protein	chromosome	-	483634	484323	0	0.0728133	278.771	0		0.515569	0.473149	0.436238	0.465754	0.586276	0.593658	0.578947	0.539993	0.75884	0.654305	0.727781	0.515571	0.54097	0.52326	-0.157997	-0.281868	-0.399047	-0.304594	0.0274166	0.0454704	0.00927003	-0.0912229	0.399633	0.1858	0.339343	-0.15799	-0.0886128	-0.136634	0	0	0	0	0	0
Synpcc7942_0497	637798904		hypothetical protein	chromosome	-	484328	484504	0	0.202311	132.568	0		0.359912	0.259334	0.319886	0.275408	0.350703	0.362905	0.250437	0.301593	0.542626	0.398989	0.527212	0.356687	0.31537	0.358859	-0.213845	-0.686675	-0.383932	-0.599919	-0.251238	-0.201898	-0.737041	-0.468887	0.378471	-0.0651399	0.336894	-0.22683	-0.404442	-0.218073	0	0	0	0	0	0
Synpcc7942_0498	637798905		mannose-1-phosphate guanyltransferase	chromosome	+	484585	487098	1	0.302903	313.865	0		0.197879	0.0480058	0.0488934	0.0639161	0.26911	0.340535	0.358731	0.076785	0.223678	0.37321	0.578486	0.168365	0.0967317	0.145895	0.20267	-1.84066	-1.81423	-1.42769	0.646249	0.985856	1.06096	-1.16305	0.37948	1.11804	1.75034	-0.0303532	-0.829886	-0.237014	0	0	0	0	0	0
Synpcc7942_0499	637798906		hydroxyneurosporene-O-methyltransferase	chromosome	-	487375	488370	1	0.789039	4.70155	1	Dusk	0.424006	0.112886	0.0816267	0.0743208	0.443969	0.980068	1.29648	0.145089	0.395054	0.863517	1.42442	0.638832	0.333344	0.487648	-0.13969	-2.04891	-2.51666	-2.65194	-0.0733153	1.06911	1.47276	-1.68684	-0.241724	0.88645	1.60853	0.451663	-0.486762	0.0620657	0	0	0	0	0	0
Synpcc7942_0500	637798907		hypothetical protein	chromosome	-	488470	488823	0	0.156414	152.894	0		0.17389	0.259334	0.194119	0.212506	0.15959	0.24392	0.201244	0.190399	0.229741	0.16862	0.259138	0.175242	0.202934	0.213157	-0.196539	0.380099	-0.037776	0.0927894	-0.320348	0.291691	0.0142309	-0.0656858	0.205294	-0.240936	0.379006	-0.185367	0.0262956	0.0971992	0	0	0	0	0	0
Synpcc7942_0501	637798908		Nucleoside-diphosphate-sugar epimerase-like	chromosome	-	488833	489483	0	0.0855091	109.954	0		0.225399	0.221038	0.266867	0.265317	0.286057	0.270129	0.300736	0.231919	0.340281	0.286699	0.398446	0.190586	0.22965	0.258964	-0.10047	-0.12866	0.143171	0.134766	0.243352	0.160697	0.315545	-0.0593331	0.493774	0.246586	0.721431	-0.342513	-0.0735173	0.0997967	0	0	0	0	0	0
Synpcc7942_0502	637798909		hypothetical protein	chromosome	-	489508	490074	0	0.0767901	272.957	0		0.0820559	0.0936909	0.113514	0.0976494	0.100868	0.102145	0.0735252	0.089393	0.0724011	0.0682071	0.0781054	0.0687445	0.0838956	0.0993903	-0.277065	-0.0857624	0.191131	-0.0260611	0.0207261	0.0388703	-0.435432	-0.153509	-0.457659	-0.54375	-0.348248	-0.532427	-0.245076	-0.000566714	0	0	0	0	0	0
Synpcc7942_0503	637798910		hypothetical protein	chromosome	-	490074	490382	0	0.0943242	167.807	0		0.521199	0.522431	0.678128	0.68946	0.70198	0.582738	0.478181	0.530486	0.671783	0.565926	0.662854	0.307362	0.507388	0.417302	0.0175303	0.0209375	0.397253	0.421164	0.447126	0.178545	-0.106748	0.0430108	0.383691	0.13631	0.364387	-0.744364	-0.0212141	-0.303213	0	0	0	0	0	0
Synpcc7942_0504	637798911	hemA	glutamyl-tRNA reductase	chromosome	-	490382	491698	1	0.160337	241.743	1	Dusk	0.869588	0.857242	1.01269	1.04278	1.16403	0.985856	0.812996	0.991215	1.21682	1.2946	1.01659	0.544403	0.705796	0.681737	0.0515523	0.0309218	0.271337	0.313589	0.472278	0.232596	-0.0455312	0.240418	0.536267	0.625659	0.276892	-0.624106	-0.249529	-0.299564	0	0	0	0	0	0
Synpcc7942_0505	637798912	glpX, fbpI	fructose 1,6-bisphosphatase II	chromosome	-	491830	492867	1	0.647896	143.989	1	Dawn	3.33203	4.71136	7.10836	8.14309	4.44954	3.47861	3.48093	6.43053	3.48326	2.2387	1.41631	2.74282	3.88644	4.2775	-0.404064	0.0956764	0.68905	0.88511	0.0131891	-0.341953	-0.340993	0.544473	-0.340027	-0.977806	-1.63833	-0.684804	-0.182016	-0.0436965	0	0	0	0	1	89
Synpcc7942_0506	637798913	pyrH	uridylate kinase	chromosome	+	492988	493749	1	0.252496	150.45	1	Dawn	0.931829	1.18989	1.41241	1.48243	0.845746	0.979777	1.1122	1.28151	0.691204	0.575931	0.512682	1.06988	0.994998	1.08239	-0.229466	0.123226	0.37056	0.44036	-0.369307	-0.157078	0.0258133	0.230243	-0.660419	-0.923635	-1.09147	-0.0301566	-0.134837	-0.0133874	0	0	0	0	1	89
Synpcc7942_0507	637798914	frr, rrf	ribosome recycling factor	chromosome	+	493736	494284	1	0.347417	147.463	1	Dawn	1.56063	2.12784	2.24159	2.44235	1.38604	1.66105	1.72922	2.33462	1.36288	1.11637	0.878686	1.62796	1.72851	1.8355	-0.331924	0.115334	0.190466	0.314212	-0.503089	-0.241965	-0.183932	0.249129	-0.527399	-0.815235	-1.16064	-0.270987	-0.184532	-0.097881	0	0	0	0	0	0
Synpcc7942_0508	637798915		geranylgeranyl reductase	chromosome	+	494291	495421	1	0.269868	125.783	1	Dawn	0.501869	0.787541	0.936196	0.948221	0.455727	0.510216	0.52864	0.816683	0.388305	0.228951	0.275493	0.577141	0.642045	0.621992	-0.361492	0.288553	0.538009	0.556422	-0.500632	-0.337694	-0.286517	0.340975	-0.731611	-1.49376	-1.22679	-0.159877	-0.00612804	-0.0519045	0	0	0	0	0	0
Synpcc7942_0509	637798916		hypothetical protein	chromosome	+	495460	495933	1	0.0976714	252.998	0		0.152518	0.207825	0.245028	0.187909	0.154502	0.135515	0.162542	0.191113	0.150336	0.159632	0.205212	0.246697	0.172039	0.164231	-0.498887	-0.0525003	0.185073	-0.197836	-0.480247	-0.669418	-0.407054	-0.173447	-0.519684	-0.433125	-0.0707549	0.19487	-0.325135	-0.392148	0	0	0	0	0	0
Synpcc7942_0510	637798917	serB	2-hydroxy-3-keto-5-methylthiopentenyl-1- phosphate phosphatase	chromosome	-	495930	496580	0	0.103142	139.233	0		0.280375	0.395333	0.446761	0.440038	0.377124	0.313803	0.324244	0.457211	0.297448	0.232459	0.221089	0.304431	0.378027	0.412288	-0.320867	0.174845	0.351281	0.329406	0.106817	-0.158365	-0.111145	0.384638	-0.235584	-0.591247	-0.663597	-0.202107	0.110268	0.235428	0	0	0	0	0	0
Synpcc7942_0511	637798918	ccsA	ABC-type transport system involved in cytochrome c biogenesis permease component-like	chromosome	-	496602	497579	1	0.135685	148.198	0		1.04	0.979829	1.17123	1.22763	1.45912	1.27913	1.21243	1.30502	1.51664	1.16825	1.17895	0.925084	1.01447	1.18272	-0.288745	-0.374732	-0.117311	-0.0494536	0.199761	0.00982612	-0.0674321	0.0387421	0.255545	-0.120985	-0.107832	-0.457677	-0.32461	-0.10323	0	0	0	0	0	0
Synpcc7942_0512	637798919	ycf84	conserved hypothetical protein YCF84	chromosome	-	497624	498808	1	0.165548	252.677	1	Dusk	0.791284	0.633269	0.589291	0.661745	0.738666	0.696681	0.694257	0.695287	0.836651	0.831504	0.880911	0.717159	0.628352	0.658132	0.121097	-0.200281	-0.304117	-0.136823	0.0218245	-0.0626008	-0.0676289	-0.0654907	0.201527	0.192624	0.275898	-0.0208054	-0.211524	-0.144722	0	0	0	0	0	0
Synpcc7942_0513	637798920		ATPase	chromosome	-	498901	499653	0	0.072481	41.676	0		0.584601	0.523289	0.588042	0.620199	0.604841	0.509029	0.581668	0.53205	0.512256	0.468931	0.395934	0.522012	0.500867	0.545442	-0.0288483	-0.188693	-0.0203818	0.0564314	0.0202548	-0.228553	-0.0361038	-0.164738	-0.219436	-0.346924	-0.591041	-0.192217	-0.251874	-0.128875	0	0	0	0	0	0
Synpcc7942_0514	637798921		hypothetical protein	chromosome	-	499683	500105	0	0.119501	264.085	0		1.50094	1.10101	1.28476	1.32172	1.41472	1.29449	1.38351	1.42132	1.84575	1.58009	1.26381	1.51588	1.2657	1.32096	0.074849	-0.37219	-0.149518	-0.108597	-0.0105009	-0.13863	-0.0426781	-0.00377912	0.373191	0.148991	-0.173233	0.0891418	-0.171078	-0.109426	0	0	0	0	0	0
Synpcc7942_0515	637798922		hypothetical protein	chromosome	-	500143	500565	0	0.130707	281.807	0		0.593945	0.480396	0.693289	0.579053	0.59029	0.647245	0.4803	0.671783	0.54933	0.653899	0.65995	1.0227	0.960465	0.483224	0.21416	-0.0919455	0.437288	0.177528	0.205255	0.338144	-0.0922326	0.391826	0.101505	0.352898	0.366187	0.998144	0.907563	-0.0834772	0	0	0	0	0	0
Synpcc7942_0516	637798923	ctpB	C-terminal processing peptidase-2. Serine peptidase. MEROPS family S41A	chromosome	-	500562	501884	0	0.248671	216.95	0		1.12534	0.926643	1.06296	1.00166	1.11447	1.23051	0.895067	1.27202	1.31786	1.68463	1.34851	1.81627	1.3153	0.801018	0.230863	-0.0494096	0.148595	0.0629029	0.216861	0.359762	-0.0994287	0.407622	0.458698	0.812937	0.491875	0.92148	0.455899	-0.259589	0	0	0	0	0	0
Synpcc7942_0517	637798924	recJ	exonuclease RecJ	chromosome	-	502006	504333	0	0.0652448	8.47688	0		0.0747141	0.0522844	0.052592	0.0491174	0.0626161	0.0583503	0.0816041	0.0715705	0.108464	0.113397	0.137918	0.130408	0.0852779	0.0726215	-0.264112	-0.779112	-0.77065	-0.86926	-0.518959	-0.620754	-0.136852	-0.326127	0.273656	0.337817	0.62024	0.53947	-0.0733212	-0.305096	0	0	0	0	0	0
Synpcc7942_0518	637798926		hypothetical protein	chromosome	+	504393	505556	0	0.19886	81.9341	0		0.200468	0.21091	0.244044	0.247655	0.188148	0.186359	0.219878	0.24876	0.184323	0.189958	0.186834	0.224029	0.225601	0.208838	-0.123497	-0.0502383	0.160272	0.181466	-0.214998	-0.228782	0.00983495	0.187887	-0.244631	-0.201186	-0.225109	0.0368167	0.0469057	-0.064481	0	0	0	0	0	0
Synpcc7942_0519	637798927		hypothetical protein	chromosome	+	505620	506138	0	0.0583711	290.625	0		0.281347	0.325949	0.383227	0.352509	0.306401	0.318543	0.34062	0.289865	0.288033	0.254324	0.284938	0.264445	0.341367	0.326668	0.148563	0.36086	0.594414	0.473875	0.271635	0.327702	0.424375	0.191594	0.182448	0.00287971	0.166862	0.0591809	0.427537	0.364036	0	0	0	0	0	0
Synpcc7942_0520	637798928		hypothetical protein	chromosome	+	506188	506829	0	0.266409	162.995	0		0.319983	0.451486	0.565338	0.603692	0.309623	0.291958	0.325501	0.338477	0.244914	0.120478	0.142889	0.221476	0.351572	0.34219	-0.20057	0.296118	0.62055	0.715249	-0.248053	-0.332801	-0.175901	-0.119507	-0.586289	-1.60979	-1.36367	-0.731411	-0.0647441	-0.103765	0	0	0	0	0	0
Synpcc7942_0521	637798929		hypothetical protein	chromosome	+	506835	507422	0	0.209437	71.363	0		0.139991	0.212266	0.242788	0.275321	0.153015	0.130732	0.167825	0.12655	0.0987953	0.088648	0.0806957	0.115773	0.150242	0.158381	0.105267	0.705809	0.899629	1.08105	0.23361	0.00654432	0.366891	-0.0403647	-0.397552	-0.553906	-0.689504	-0.168768	0.207218	0.28333	0	0	0	0	0	0
Synpcc7942_0522	637798930		hypothetical protein	chromosome	+	507941	508312	1	0.17389	341.413	1	Dusk	0.398297	0.149735	0.149602	0.169868	0.440603	0.518017	0.495079	0.224671	0.570506	0.842987	1.10544	0.246454	0.301415	0.310683	0.10807	-1.30336	-1.30465	-1.12136	0.253707	0.487226	0.421886	-0.717958	0.626468	1.18974	1.58078	-0.584454	-0.294021	-0.250331	0	0	0	0	0	0
Synpcc7942_0523	637798931		hypothetical protein	chromosome	-	508314	508703	0	0.110235	211.594	0		0.567118	0.62684	0.686187	0.63268	0.511475	0.477908	0.568299	0.470081	0.504454	0.491502	0.431908	0.45749	0.528957	0.527786	0.078541	0.222991	0.353495	0.236367	-0.0704442	-0.168373	0.081543	-0.192197	-0.0903847	-0.127911	-0.314383	-0.231368	-0.0219566	-0.0251553	0	0	0	0	0	0
Synpcc7942_0524	637798932		hypothetical protein	chromosome	-	508795	509202	0	0.0994956	312.567	0		0.263154	0.393137	0.498163	0.460213	0.290611	0.304549	0.271614	0.377976	0.391075	0.331757	0.34889	0.31217	0.323597	0.269223	-0.41642	0.162701	0.504288	0.389973	-0.273242	-0.205653	-0.370774	0.105966	0.155114	-0.0822013	-0.00955679	-0.17	-0.11813	-0.383526	0	0	0	0	0	0
Synpcc7942_0525	637798933	aroB	3-dehydroquinate synthase	chromosome	-	509226	510332	1	0.121027	146.946	0		0.23924	0.398813	0.477809	0.450683	0.277222	0.252078	0.259801	0.285923	0.293869	0.249104	0.222886	0.185972	0.289834	0.271361	-0.352798	0.384457	0.645179	0.560858	-0.140213	-0.277388	-0.233848	-0.0956288	-0.0560815	-0.294507	-0.454948	-0.716174	-0.0760268	-0.171041	0	0	0	0	0	0
Synpcc7942_0526	637798934	lacF	ABC-type sugar transport systems permease components-like	chromosome	+	510412	511293	0	0.167358	52.5896	0		0.171235	0.15496	0.158566	0.171265	0.179506	0.181473	0.138209	0.251265	0.214276	0.194454	0.169461	0.168058	0.149691	0.140783	-0.0026566	-0.146738	-0.113549	-0.00240282	0.0653992	0.0811148	-0.311787	0.550573	0.320834	0.18079	-0.0176842	-0.0296816	-0.196647	-0.285165	0	0	0	0	0	0
Synpcc7942_0527	637798935		hypothetical protein	chromosome	-	511398	512234	1	0.703228	348.521	1	Dusk	0.282207	0.236619	0.287929	0.265317	0.569972	0.504493	0.482943	0.293764	0.462697	0.634814	0.773811	0.486022	0.576444	0.455897	0.344547	0.0903572	0.373508	0.255512	1.35868	1.18263	1.11965	0.402449	1.05786	1.51413	1.79977	1.12881	1.37497	1.0365	0	0	0	0	0	0
Synpcc7942_0528	637798936		Lipopolysaccharide biosynthesis proteins LPS	chromosome	-	512589	513578	1	0.174064	330.987	0		0.448266	0.587127	0.88476	0.688746	0.450887	0.576501	0.480266	0.484201	0.491334	0.602945	0.654222	0.62995	0.650627	0.403289	0.289154	0.678471	1.27008	0.908771	0.297564	0.652122	0.388633	0.400404	0.421503	0.716826	0.834579	0.780036	0.826629	0.136612	0	0	0	0	0	0
Synpcc7942_0529	637798937	nagB, devB, pgl	6-phosphogluconolactonase	chromosome	+	513543	514331	1	0.275819	13.7468	1	Dusk	0.426383	0.390902	0.33366	0.356971	0.464977	0.589904	0.600609	0.338288	0.511462	0.525321	0.820887	0.443922	0.514311	0.539924	0.0654875	-0.0598583	-0.288286	-0.190855	0.190496	0.533816	0.559762	-0.268411	0.327963	0.366535	1.01052	0.123642	0.335976	0.406093	0	0	0	0	1	90
Synpcc7942_0530	637798938		4Fe-4S cluster binding	chromosome	+	514335	515288	0	0.0986239	180.802	0		0.159812	0.161106	0.160803	0.137522	0.16669	0.194268	0.227345	0.124912	0.125845	0.157746	0.249514	0.218099	0.215223	0.215761	-0.0202588	-0.00863038	-0.0113483	-0.236975	0.0405281	0.261406	0.488246	-0.375732	-0.364991	-0.0390317	0.62248	0.428344	0.409192	0.412798	0	0	0	0	0	0
Synpcc7942_0531	637798939		TPR repeat	chromosome	+	515313	516176	0	0.120055	0.0789761	0		0.791169	0.709163	0.75502	0.725106	0.711189	0.817796	0.819655	0.649674	0.720767	0.759962	0.728577	0.943573	0.766858	0.634561	0.13257	-0.0252985	0.0650988	0.00677665	-0.0211824	0.180325	0.183601	-0.151699	-0.00188273	0.0745125	0.0136667	0.386719	0.0875446	-0.185658	0	0	0	0	0	0
Synpcc7942_0532	637798940		hypothetical protein	chromosome	-	516414	516767	0	0.199596	162.285	0		0.155692	0.221454	0.192752	0.188705	0.137917	0.133858	0.152051	0.166028	0.100648	0.132996	0.0938258	0.240376	0.17551	0.159193	0.465883	0.974193	0.773928	0.743321	0.290986	0.247892	0.431741	0.558614	-0.163489	0.238572	-0.264757	1.09248	0.638742	0.497962	0	0	0	0	0	0
Synpcc7942_0533	637798941		hypothetical protein	chromosome	-	516764	517000	0	0.159818	162.759	0		0.431884	0.398241	0.404296	0.44184	0.261918	0.302132	0.316179	0.345823	0.349694	0.333453	0.243585	0.507293	0.339982	0.268008	0.1308	0.0137975	0.0355659	0.163681	-0.590732	-0.384666	-0.319105	-0.18981	-0.173752	-0.242362	-0.695418	0.362974	-0.214386	-0.557567	0	0	0	0	0	0
Synpcc7942_0534	637798942	glmS	D-fructose-6-phosphate amidotransferase	chromosome	-	517016	518941	0	0.132794	200.93	0		0.454516	0.303133	0.376641	0.438708	0.418624	0.37889	0.409342	0.515974	0.374409	0.359688	0.342852	0.462336	0.371734	0.408893	-0.166802	-0.751183	-0.437945	-0.217874	-0.285479	-0.429356	-0.317827	0.0161636	-0.446521	-0.504389	-0.573549	-0.142194	-0.456865	-0.319413	0	0	0	0	0	0
Synpcc7942_0535	637798943	psaC	photosystem I subunit VII	chromosome	-	519088	519333	0	0.207106	322.421	0		111.947	16.1163	24.2634	41.2759	110.316	106.072	85.8016	77.5719	120.469	126.912	102.954	42.8255	46.0712	56.8358	0.308256	-2.48797	-1.89771	-1.13119	0.287083	0.230492	-0.0754803	-0.220952	0.4141	0.489273	0.187445	-1.07801	-0.97262	-0.669687	0	0	0	0	0	0
Synpcc7942_0536	637798944	acpP	acyl carrier protein	chromosome	+	519792	520034	0	0.34146	106.605	0		8.41851	13.1868	17.8616	18.1189	12.8299	10.2355	10.882	11.5076	8.29699	5.84011	5.61708	6.66919	10.2433	12.5271	-0.275335	0.372119	0.809887	0.830523	0.33254	0.00661099	0.0949771	0.175615	-0.296313	-0.802905	-0.859079	-0.61139	0.00770166	0.298081	0	0	0	0	1	91
Synpcc7942_0537	637798945	fabF, fabJ	3-oxoacyl-(acyl carrier protein) synthase II	chromosome	+	520102	521355	0	0.211245	47.9094	0		4.19593	6.66286	8.47649	8.74459	5.31832	4.92584	5.00479	6.18803	3.99569	2.80846	2.88327	3.0387	4.92867	5.6403	-0.180768	0.486383	0.833707	0.878631	0.161211	0.0506119	0.0735521	0.379721	-0.251313	-0.759981	-0.722054	-0.646306	0.0514386	0.246014	0	0	0	0	0	0
Synpcc7942_0538	637798946	tktA, cbbT, tkt	transketolase	chromosome	+	521502	523508	0	0.211092	96.6355	0		4.14953	6.93841	8.64298	8.54389	5.44246	4.82909	4.80615	6.91329	4.91362	3.18069	2.63842	3.21077	5.05397	5.91726	-0.267695	0.473963	0.790887	0.774251	0.123617	-0.0488904	-0.0557596	0.468731	-0.0238546	-0.651304	-0.920966	-0.637721	0.0167759	0.244289	0	0	0	0	0	0
Synpcc7942_0539	637798947		hypothetical protein	chromosome	+	523604	524353	0	0.0651916	66.0269	0		0.048673	0.0515755	0.0696859	0.0866617	0.0688166	0.0519489	0.0457346	0.0841169	0.0506043	0.0560484	0.0242517	0.0519709	0.0511284	0.0490314	-0.0217413	0.0618215	0.496002	0.81053	0.477893	0.0722297	-0.111579	0.767532	0.0343959	0.18181	-1.02678	0.072839	0.0492605	-0.0111575	0	0	0	0	0	0
Synpcc7942_0540	637798948		hypothetical protein	chromosome	+	524367	524828	0	0.209097	158.02	0		0.226199	0.231085	0.23149	0.21754	0.217392	0.211971	0.170191	0.212416	0.315187	0.340294	0.280723	0.218645	0.187014	0.194339	0.168622	0.199454	0.201981	0.112312	0.111329	0.0748997	-0.241814	0.0779267	0.647239	0.757813	0.480179	0.119618	-0.105822	-0.0503906	0	0	0	0	0	0
Synpcc7942_0541	637798949		hypothetical protein	chromosome	+	524832	525062	0	0.157923	196.292	0		0.275777	0.243365	0.261867	0.224053	0.241547	0.314538	0.258142	0.296449	0.663905	0.411265	0.47586	0.351733	0.258458	0.262565	-0.00639309	-0.186773	-0.0810611	-0.306052	-0.197592	0.183341	-0.101728	0.0978924	1.26108	0.570173	0.780644	0.344585	-0.0999656	-0.0772192	0	0	0	0	0	0
Synpcc7942_0542	637798950	lipA	lipoyl synthase	chromosome	+	525360	526253	0	0.0615696	8.89302	0		0.644522	1.13247	1.06529	0.790979	0.342492	0.453481	0.616838	0.588669	0.29544	0.29905	0.421062	0.889189	0.855687	0.81573	-0.0152881	0.797881	0.709663	0.280121	-0.927449	-0.522475	-0.0786263	-0.146062	-1.14065	-1.12313	-0.629486	0.448971	0.393565	0.324574	0	0	0	0	0	0
Synpcc7942_0543	637798951		hypothetical protein	chromosome	-	526250	526813	0	0.0892967	340.637	0		0.199251	0.0951037	0.084087	0.0885653	0.175603	0.181104	0.173095	0.151056	0.343331	0.302602	0.304269	0.188836	0.16352	0.130403	0.205445	-0.861566	-1.03918	-0.964327	0.0231782	0.0676805	0.00242563	-0.19406	0.990462	0.808281	0.816205	0.127996	-0.0796734	-0.406166	0	0	0	0	0	0
Synpcc7942_0544	637798952		YciI-like protein	chromosome	+	526892	527161	1	0.308052	172.889	1	Dawn	0.482489	0.418334	0.6076	0.641938	0.643218	0.57331	0.451482	0.621091	0.499158	0.392339	0.298753	0.359892	0.462025	0.555406	-0.519335	-0.725173	-0.186707	-0.107396	-0.104522	-0.270515	-0.615161	-0.155025	-0.470334	-0.817729	-1.21088	-0.942266	-0.581859	-0.316287	0	0	0	0	0	0
Synpcc7942_0545	637798953		hypothetical protein	chromosome	+	527143	527835	1	0.166666	163.293	0		0.494745	0.416772	0.473455	0.51758	0.522345	0.439138	0.451558	0.634915	0.577843	0.491334	0.390274	0.453133	0.427261	0.428649	-0.263202	-0.510631	-0.326661	-0.198106	-0.184886	-0.435215	-0.394976	0.0966759	-0.0392105	-0.273185	-0.605402	-0.389954	-0.474772	-0.47009	0	0	0	0	0	0
Synpcc7942_0546	637798954	nha4, nhaS4	Na+/H+ antiporter	chromosome	+	527876	530023	0	0.295169	308.017	0		0.26092	0.156071	0.115801	0.123838	0.283467	0.289237	0.210051	0.261573	0.444612	0.485727	0.400195	0.264271	0.180103	0.162973	0.395669	-0.345734	-0.776294	-0.679487	0.515245	0.544315	0.0828009	0.399274	1.16461	1.29221	1.01277	0.41408	-0.139117	-0.283307	0	0	0	0	0	0
Synpcc7942_0547	637798955		hypothetical protein	chromosome	-	530057	530566	0	0.0880682	137.845	0		0.0617536	0.0768576	0.0759105	0.0778822	0.0738493	0.055748	0.0693261	0.102556	0.0379684	0.0576969	0.0325631	0.120562	0.12468	0.0543129	-0.0591674	0.256498	0.23861	0.275605	0.198895	-0.206768	0.10771	0.672648	-0.76089	-0.157195	-0.982452	0.906014	0.95447	-0.244395	0	0	0	0	0	0
Synpcc7942_0548	637798956		hypothetical protein	chromosome	-	530623	531783	1	0.172663	261.172	0		0.435263	0.252769	0.295943	0.355077	0.391686	0.399077	0.386348	0.427282	0.476342	0.479381	0.49656	0.385852	0.331541	0.324556	-0.131538	-0.915608	-0.688106	-0.425293	-0.283728	-0.25676	-0.303524	-0.158238	-0.00142955	0.00774581	0.0585417	-0.305379	-0.524239	-0.554958	0	0	0	0	0	0
Synpcc7942_0549	637798957		hypothetical protein	chromosome	+	531884	532645	0	0.115373	91.9657	0		0.555152	0.663307	0.588717	0.62867	0.584883	0.627389	0.628123	0.576715	0.761341	0.720465	0.831293	0.555472	0.667579	0.59854	-0.194958	0.0618355	-0.110265	-0.0155379	-0.119693	-0.0184804	-0.0167937	-0.139982	0.260703	0.181088	0.387516	-0.194126	0.0710975	-0.0863924	0	0	0	0	0	0
Synpcc7942_0550	637798958		hypothetical protein	chromosome	+	532654	533037	0	0.0974101	89.2023	0		0.328066	0.339807	0.288593	0.264862	0.217958	0.244059	0.284467	0.234501	0.23398	0.227697	0.302735	0.294509	0.283148	0.256201	0.280374	0.331105	0.0954271	-0.0283689	-0.309561	-0.146381	0.0746488	-0.204019	-0.207224	-0.246497	0.164444	0.124701	0.0679436	-0.0763345	0	0	0	0	0	0
Synpcc7942_0551	637798959		hypothetical protein	chromosome	+	533570	533941	1	0.435301	239.24	1	Dusk	52.4578	6.5634	4.71051	10.1225	45.1647	46.2083	27.1769	14.1427	40.0541	33.1002	32.0983	6.24843	5.37459	8.9546	0.607891	-2.39075	-2.86931	-1.7657	0.391928	0.424885	-0.340886	-1.28321	0.218684	-0.0564253	-0.100771	-2.4617	-2.67904	-1.94257	0	0	1	48	1	93
Synpcc7942_0552	637798960	nfrC	UDP-N-acetylglucosamine 2-epimerase	chromosome	+	534067	535185	1	0.348249	145.022	0		0.286568	0.437862	0.577775	0.663128	0.342188	0.238082	0.37727	0.508371	0.281027	0.197597	0.159718	0.400334	0.351793	0.421242	-0.590562	0.0210366	0.421069	0.61985	-0.334648	-0.85798	-0.193841	0.236445	-0.618728	-1.12688	-1.43391	-0.108233	-0.294712	-0.0347877	0	0	0	0	0	0
Synpcc7942_0553	637798961		Secretion protein HlyD	chromosome	-	535182	536534	0	0.101274	311.818	0		0.223251	0.385005	0.464973	0.350504	0.228365	0.188345	0.186433	0.298897	0.332034	0.285213	0.339005	0.305534	0.350863	0.218846	-0.318677	0.467533	0.739801	0.332085	-0.286007	-0.56397	-0.57869	0.102305	0.253985	0.0346949	0.283962	0.133988	0.333561	-0.347429	0	0	0	0	0	0
Synpcc7942_0554	637798962	ychF	translation-associated GTPase	chromosome	+	536594	537685	0	0.434006	142.335	0		0.830488	1.28419	1.63924	1.76136	0.965722	0.856301	0.983892	1.09324	0.675254	0.430372	0.406272	0.839569	0.925897	1.19263	-0.430127	0.198703	0.550873	0.654534	-0.212478	-0.385968	-0.185586	-0.0335537	-0.728657	-1.3785	-1.46164	-0.414436	-0.273234	0.0919942	0	0	0	0	0	0
Synpcc7942_0555	637798963		zinc metalloprotease	chromosome	+	537790	538509	0	0.0604513	120.296	0		0.0457304	0.032951	0.0631797	0.0417929	0.0242176	0.0160878	0.0263853	0.0434364	0.0118335	0.0198505	0.0175737	0.047274	0.0391013	0.0298487	0.39655	-0.0762807	0.862858	0.266653	-0.520549	-1.11064	-0.396868	0.322303	-1.55373	-0.807428	-0.983183	0.444443	0.170615	-0.218936	0	0	0	0	0	0
Synpcc7942_0556	637798964	srrB	two component transcriptional regulator, winged helix family	chromosome	-	538506	539219	1	1.03837	347.366	1	Dusk	1.53281	0.872594	0.567973	0.651547	1.60495	1.43795	1.21062	0.885092	1.90276	2.51394	2.19745	1.20947	1.00274	1.18191	1.17669	0.363889	-0.255598	-0.0575517	1.24304	1.08452	0.836254	0.384405	1.4886	1.89046	1.69634	0.834876	0.56446	0.801623	1	29	0	0	1	95
Synpcc7942_0557	637798965		hypothetical protein	chromosome	+	539414	539605	0	0.376337	23.7953	0		1.36446	0.690359	0.529298	0.482708	1.23873	0.899453	0.678872	1.05315	2.05741	2.57035	2.10885	1.23236	0.937927	0.73378	0.774823	-0.208082	-0.59135	-0.724281	0.635358	0.173619	-0.23229	0.401204	1.36733	1.68846	1.40295	0.627926	0.234045	-0.120083	1	29	0	0	1	95
Synpcc7942_0558	637798966		hypothetical protein	chromosome	+	539683	540297	0	0.129837	33.8596	0		0.972995	0.697737	0.749894	0.712395	1.0547	0.938299	0.779118	0.950414	1.03022	1.45726	1.11872	0.980144	0.842142	0.819261	0.246319	-0.233431	-0.129427	-0.203436	0.362653	0.193935	-0.0742721	0.212443	0.32877	0.829073	0.447661	0.256881	0.0379508	-0.00179016	0	0	0	0	0	0
Synpcc7942_0559	637798967	hslO, hsp33	Hsp33-like chaperonin	chromosome	-	540349	541242	1	0.0779364	84.9589	0		0.6173	0.767863	0.770823	0.667788	0.417387	0.517086	0.666421	0.595907	0.461788	0.426006	0.595325	0.712947	0.829083	0.71156	-0.000978356	0.313899	0.319449	0.11244	-0.565564	-0.256545	0.109484	-0.051864	-0.419721	-0.536077	-0.0532735	0.206845	0.424565	0.204036	0	0	0	0	0	0
Synpcc7942_0560	637798968		ATPase	chromosome	-	541275	541979	0	0.0817228	89.6468	0		0.234532	0.297748	0.296536	0.247556	0.17313	0.234502	0.284437	0.231746	0.228521	0.228964	0.251267	0.350418	0.322909	0.302128	-0.148097	0.196208	0.190322	-0.0701279	-0.586029	-0.148283	0.130229	-0.165338	-0.185554	-0.182763	-0.0486623	0.431193	0.313244	0.217276	0	0	0	0	0	0
Synpcc7942_0561	637798969		hypothetical protein	chromosome	+	542054	543049	0	0.133145	260.35	0		0.616606	0.844574	0.839589	0.696078	0.390049	0.415498	0.54837	0.619876	0.460378	0.52672	0.537534	0.696708	0.797784	0.649239	-0.0711706	0.382706	0.374164	0.10373	-0.731864	-0.640676	-0.24037	-0.0635384	-0.492698	-0.298481	-0.269163	0.105035	0.300481	0.00323024	0	0	0	0	1	96
Synpcc7942_0562	637798970		hypothetical protein	chromosome	+	543141	543596	0	0.0661463	326.325	0		0.527417	0.907095	0.755609	0.692882	0.312024	0.40181	0.427026	0.523839	0.421249	0.494111	0.42836	0.680215	0.712127	0.603257	0.0527287	0.835039	0.571426	0.446394	-0.704557	-0.339702	-0.251892	0.0429083	-0.27154	-0.0413786	-0.247392	0.419777	0.48592	0.246559	0	0	0	0	0	0
Synpcc7942_0563	637798971	uvrB	excinuclease ABC subunit B	chromosome	-	543654	545654	0	0.0863645	232.992	0		0.140938	0.115987	0.0899659	0.0863176	0.126527	0.115774	0.118411	0.131771	0.137802	0.162179	0.150971	0.170924	0.121774	0.110266	0.105471	-0.17563	-0.54214	-0.601864	-0.0501481	-0.178278	-0.145789	0.00844449	0.0730058	0.307998	0.204678	0.383767	-0.10539	-0.248609	0	0	0	0	0	0
Synpcc7942_0564	637798972		ATPase	chromosome	+	545774	546487	0	0.0772002	209.883	0		0.304758	0.235485	0.218921	0.222521	0.251049	0.258093	0.300068	0.218252	0.343885	0.359134	0.34889	0.274494	0.256295	0.289624	-0.168262	-0.540292	-0.645518	-0.621986	-0.447958	-0.408035	-0.190634	-0.64993	0.00600229	0.0685969	0.0268478	-0.319151	-0.418122	-0.241744	0	0	0	0	0	0
Synpcc7942_0565	637798973		FHA domain containing protein	chromosome	+	546588	547250	0	0.0985363	231.57	0		1.35707	0.914823	0.770054	0.951289	1.65477	1.5692	1.1764	1.46229	1.73253	2.04285	1.64724	1.24537	1.25852	1.26058	0.183236	-0.385691	-0.634225	-0.329301	0.469376	0.392777	-0.022883	0.290978	0.535622	0.773329	0.462794	0.0593143	0.0744672	0.0768288	0	0	0	0	0	0
Synpcc7942_0566	637798974		HAD-superfamily hydrolase subfamily IIB	chromosome	+	547262	548017	0	0.133866	146.441	0		0.441208	0.403189	0.339263	0.409968	0.504648	0.488901	0.365067	0.536358	0.535837	0.440381	0.540811	0.521393	0.544465	0.521799	0.135428	0.00542594	-0.243628	0.0294801	0.329246	0.283512	-0.137871	0.417165	0.415762	0.13272	0.429092	0.376341	0.438809	0.377463	0	0	0	0	0	0
Synpcc7942_0567	637798975		hypothetical protein	chromosome	-	548019	549368	1	0.14271	5.39787	0		0.227459	0.194841	0.190704	0.159147	0.215956	0.272225	0.295516	0.156571	0.18073	0.248481	0.284109	0.259854	0.230833	0.225346	0.0789454	-0.144365	-0.175325	-0.436299	0.00407724	0.338138	0.456574	-0.459844	-0.252828	0.206477	0.399782	0.271042	0.100188	0.0654838	0	0	0	0	0	0
Synpcc7942_0568	637798976	codA	cytosine deaminase	chromosome	-	549371	550687	1	0.36119	231.329	1	Dusk	0.677192	0.209122	0.188501	0.213858	0.473451	0.430962	0.438353	0.583429	0.895708	0.845834	0.634696	1.30181	0.335023	0.320562	0.280585	-1.41464	-1.56441	-1.38233	-0.235766	-0.371419	-0.346887	0.0655766	0.684049	0.601394	0.187085	1.22347	-0.734721	-0.798379	0	0	0	0	0	0
Synpcc7942_0569	637798977	rpoD4	DNA-directed RNA polymerase sigma subunit (sigma70/sigma32)-like	chromosome	-	550718	551653	1	0.317165	236.572	1	Dusk	4.76192	0.779693	0.559931	0.755486	3.70417	3.25693	2.72479	3.33032	7.09264	7.69409	4.47961	7.70519	1.34106	1.55366	0.408427	-2.20214	-2.6798	-2.24764	0.0460324	-0.139604	-0.396972	-0.107457	0.983206	1.10063	0.320256	1.10271	-1.41974	-1.20745	0	0	0	0	0	0
Synpcc7942_0570	637798978	dnaE	DNA polymerase III subunit alpha	chromosome	-	551878	553221	0	0.0902548	9.57191	0		0.246582	0.198397	0.198037	0.196128	0.280751	0.277358	0.308221	0.222264	0.287	0.258348	0.364223	0.245084	0.257505	0.242698	-0.0118839	-0.325562	-0.328183	-0.342156	0.175339	0.157796	0.310016	-0.161676	0.207102	0.0553666	0.550873	-0.020675	0.0506525	-0.0347878	0	0	0	0	0	0
Synpcc7942_0571	637798979		sugar (Glycoside-Pentoside-Hexuronide) transporter	chromosome	-	553324	554697	1	0.300888	328.851	1	Dusk	0.318819	0.152024	0.129259	0.145417	0.393403	0.472862	0.490836	0.219373	0.301028	0.54274	0.659015	0.374782	0.23316	0.301354	0.0676327	-1.00081	-1.23484	-1.06491	0.370904	0.636315	0.690137	-0.471716	-0.0152065	0.835156	1.11521	0.300948	-0.383787	-0.0136443	0	0	0	0	0	0
Synpcc7942_0572	637798980		hypothetical protein	chromosome	-	554694	555134	0	0.306902	325.533	0		0.418756	0.192969	0.174478	0.206064	0.512424	0.479947	0.611469	0.220086	0.451385	0.657711	0.912758	0.364747	0.293879	0.340045	0.224796	-0.89294	-1.03827	-0.798217	0.516025	0.421563	0.770968	-0.703244	0.333046	0.876142	1.34892	0.025584	-0.286089	-0.075588	1	31	0	0	1	99
Synpcc7942_0573	637798981		hypothetical protein	chromosome	-	555297	555533	1	0.745228	340.14	1	Dusk	0.498328	0.134923	0.0612569	0.0558649	0.42672	0.893066	0.857245	0.07508	0.513102	1.2132	1.77851	0.287234	0.169991	0.39496	0.573612	-1.31134	-2.45054	-2.58347	0.349805	1.41528	1.35622	-2.15698	0.615763	1.85726	2.40911	-0.221256	-0.978025	0.238222	0	0	0	0	0	0
Synpcc7942_0574	637798982		hypothetical protein	chromosome	+	555612	556442	0	0.0906687	105.609	0		0.256682	0.236465	0.282438	0.299098	0.274454	0.248365	0.238135	0.219967	0.285215	0.210435	0.265509	0.210082	0.192172	0.230456	-0.0814278	-0.19978	0.0565257	0.139211	0.015157	-0.128943	-0.18963	-0.304121	0.0706442	-0.368036	-0.0326458	-0.370455	-0.499006	-0.236915	0	0	0	0	0	0
Synpcc7942_0575	637798983		hypothetical protein	chromosome	-	556414	556977	0	0.163237	115.178	0		2.09531	1.22903	1.44664	1.53762	2.01696	2.0855	2.08182	1.79259	2.02565	2.15995	1.86207	1.59148	1.67823	1.481	0.00159108	-0.768046	-0.532863	-0.444869	-0.0533857	-0.00517679	-0.00772413	-0.223524	-0.0471814	0.0454295	-0.168665	-0.3952	-0.318628	-0.498996	0	0	1	49	1	100
Synpcc7942_0576	637798984	thiG	thiazole synthase	chromosome	+	557200	558060	0	0.0745226	300.297	0		0.325884	0.310891	0.482243	0.608108	0.482799	0.442733	0.469481	0.413333	0.408418	0.377888	0.486798	0.314345	0.405906	0.479797	-0.271638	-0.339588	0.293767	0.628333	0.295427	0.170441	0.255072	0.0713082	0.054053	-0.0580375	0.30733	-0.323646	0.0451513	0.286431	0	0	0	0	0	0
Synpcc7942_0577	637798985		hypothetical protein	chromosome	+	558144	558314	1	0.359127	252.849	1	Dusk	3.90958	0.744979	0.843339	1.68227	4.03388	3.96575	3.07366	2.27982	4.17626	4.54287	3.18177	2.00653	1.76275	1.47463	0.48708	-1.90466	-1.72575	-0.729522	0.532235	0.507661	0.140023	-0.291013	0.582277	0.703671	0.189895	-0.475228	-0.662103	-0.919582	0	0	0	0	0	0
Synpcc7942_0578	637798986	sqdB	UDP-sulfoquinovose synthase	chromosome	+	558408	559616	1	0.341694	122.63	1	Dawn	2.03781	1.37364	1.59589	1.99461	2.17778	2.03984	1.98512	2.29287	2.17439	1.88729	1.30429	2.03566	1.5132	1.7369	-0.16781	-0.736827	-0.520472	-0.198725	-0.0719738	-0.166373	-0.205605	0.00232619	-0.0742177	-0.278515	-0.811562	-0.169334	-0.597229	-0.398315	0	0	0	0	1	101
Synpcc7942_0579	637798987	sqdX	sulfolipid sulfoquinovosyldiacylglycerol biosynthesis protein	chromosome	+	559632	560765	1	0.185941	113.137	0		0.554193	0.477551	0.554343	0.60394	0.477278	0.495866	0.458835	0.622898	0.422112	0.298035	0.24408	0.595947	0.473411	0.469156	-0.283866	-0.4986	-0.283476	-0.159849	-0.499424	-0.444304	-0.55628	-0.115258	-0.676627	-1.17877	-1.4669	-0.179069	-0.511161	-0.524187	0	0	0	0	0	0
Synpcc7942_0580	637798988	ftsI	Peptidoglycan glycosyltransferase	chromosome	-	560720	562537	1	0.0659197	236.409	0		0.282296	0.247948	0.221468	0.245295	0.280061	0.272233	0.283011	0.277317	0.238587	0.266369	0.29623	0.343646	0.300102	0.288964	-0.0389653	-0.226136	-0.389074	-0.241656	-0.0504355	-0.0913346	-0.0353167	-0.0646379	-0.281659	-0.122749	0.0305455	0.244749	0.0492781	-0.00528417	0	0	0	0	0	0
Synpcc7942_0581	637798989		hypothetical protein	chromosome	-	562634	562981	1	0.559577	349.248	1	Dusk	0.6767	0.428314	0.319838	0.415046	0.823731	0.986448	1.02812	0.393562	0.681075	0.997759	0.95898	0.656261	0.6458	0.767145	0.683359	0.0235104	-0.397814	-0.0218847	0.967016	1.22709	1.28678	-0.0985659	0.692656	1.24353	1.18634	0.639114	0.61593	0.864342	0	0	0	0	0	0
Synpcc7942_0582	637798990		hypothetical protein	chromosome	-	563020	564024	0	0.0592343	166.857	0		0.0320498	0.0431079	0.0399663	0.0544929	0.0506617	0.0544845	0.058284	0.056872	0.0354523	0.0418272	0.0346229	0.0480706	0.0482981	0.0565491	-0.434243	-0.00660947	-0.115776	0.331508	0.226335	0.331286	0.428539	0.393158	-0.288682	-0.0501193	-0.322836	0.150594	0.157406	0.384944	0	0	0	0	0	0
Synpcc7942_0583	637798991	chlI	protoporphyrin IX magnesium-chelatase	chromosome	+	564123	565217	0	0.246571	111.845	0		0.929533	1.76204	2.2632	2.27152	1.10384	1.02032	1.0583	1.46055	0.699576	0.561252	0.569822	0.740006	1.28065	1.28445	-0.318034	0.604638	0.965751	0.971043	-0.0700776	-0.183588	-0.130858	0.333897	-0.728061	-1.04589	-1.02403	-0.647005	0.144261	0.148534	0	0	0	0	1	102
Synpcc7942_0584	637798992	rpiA, cbbI, ppi	ribose-5-phosphate isomerase A	chromosome	-	565354	566079	0	0.282699	141.476	0		0.355918	0.569035	0.788552	0.810712	0.389082	0.36261	0.403412	0.655075	0.328599	0.229289	0.202606	0.434048	0.451967	0.532178	-0.46793	0.209043	0.67973	0.719715	-0.3394	-0.441058	-0.287222	0.412184	-0.583146	-1.10231	-1.2808	-0.18162	-0.123259	0.112434	0	0	0	0	0	0
Synpcc7942_0585	637798993		PDZ/DHR/GLGF	chromosome	-	566168	567388	1	0.408224	182.046	1	Dawn	1.013	0.675846	0.879476	0.802423	1.14473	0.927105	0.921001	1.55272	2.61484	2.29633	2.31028	1.44958	1.75991	0.901572	-0.0229494	-0.606811	-0.226862	-0.359143	0.153436	-0.150773	-0.160302	0.593217	1.34514	1.15776	1.16649	0.494058	0.773923	-0.191063	0	0	0	0	0	0
Synpcc7942_0586	637798994		hypothetical protein	chromosome	-	567539	568279	0	0.0684832	294.237	0		0.118814	0.0494178	0.0365723	0.0357354	0.0856537	0.0824225	0.0833221	0.0756787	0.0815322	0.105516	0.106723	0.121503	0.0622303	0.0638061	0.624845	-0.640753	-1.07503	-1.10843	0.152731	0.0972542	0.112914	-0.0258959	0.0815851	0.45361	0.470016	0.657141	-0.308168	-0.272091	0	0	0	0	0	0
Synpcc7942_0587	637798998	valS	valyl-tRNA synthetase	chromosome	+	573854	576583	0	0.178428	120.926	0		0.36392	0.59718	0.639921	0.661778	0.420779	0.399221	0.398583	0.471464	0.286273	0.245443	0.229134	0.347692	0.468327	0.46061	-0.119557	0.594986	0.694715	0.743169	0.0898825	0.0140092	0.0116993	0.253968	-0.465786	-0.687792	-0.786986	-0.185368	0.244337	0.220366	0	0	0	0	0	0
Synpcc7942_0588	637798999	purT	phosphoribosylglycinamide formyltransferase 2	chromosome	-	576665	577840	1	0.0741091	145.314	0		0.535618	0.488564	1.03617	1.21745	0.543857	0.49696	0.516039	0.701983	0.270699	0.264514	0.247467	0.372061	0.545245	0.49829	-0.046041	-0.178698	0.905943	1.13855	-0.0240163	-0.154114	-0.0997631	0.344192	-1.03055	-1.0639	-1.16001	-0.571706	-0.0203396	-0.150259	0	0	1	50	1	104
Synpcc7942_0589	637799000		Fe-S-cluster oxidoreductase-like	chromosome	+	577911	578573	0	0.0539144	86.6868	0		0.288255	0.33528	0.228461	0.246899	0.313491	0.390713	0.559544	0.167538	0.225474	0.400708	0.585658	0.337839	0.278206	0.402664	-0.131938	0.08608	-0.467334	-0.355361	-0.0108585	0.306824	0.824967	-0.914799	-0.486324	0.343268	0.890775	0.0970503	-0.183132	0.350294	0	0	0	0	0	0
Synpcc7942_0590	637799001		membrane protein-like	chromosome	+	578620	578967	1	0.253634	7.3336	1	Dusk	0.806281	1.2716	0.677223	0.638134	0.420885	0.64452	0.899224	0.670915	0.525273	0.625713	0.922621	0.67677	0.704382	0.809688	0.0954398	0.752733	-0.156211	-0.241984	-0.842418	-0.227617	0.252838	-0.169713	-0.522774	-0.270341	0.289895	-0.157178	-0.099484	0.101524	0	0	0	0	1	104
Synpcc7942_0591	637799002		membrane protein-like	chromosome	+	578972	579298	1	0.264812	27.8921	1	Dusk	0.562555	1.17346	0.716275	0.493232	0.294343	0.437953	0.655195	0.623308	0.293715	0.406223	0.561069	0.50198	0.464615	0.579813	-0.0124446	1.04826	0.336075	-0.202171	-0.946938	-0.373663	0.207486	0.135507	-0.95002	-0.482167	-0.0162589	-0.176809	-0.288404	0.0311487	0	0	0	0	0	0
Synpcc7942_0592	637799003	pfkA	6-phosphofructokinase	chromosome	-	579312	580394	0	0.177887	303.693	0		0.284858	0.180014	0.183652	0.223945	0.408948	0.324754	0.247043	0.358976	0.431977	0.433172	0.391393	0.302628	0.249197	0.205055	0.164608	-0.497524	-0.46866	-0.18249	0.686284	0.353712	-0.0408743	0.498254	0.765322	0.769306	0.622983	0.25191	-0.0283483	-0.309626	0	0	0	0	0	0
Synpcc7942_0593	637799004		hypothetical protein	chromosome	-	580422	581174	1	0.351406	232.359	1	Dusk	0.717681	0.363015	0.402953	0.461953	1.06797	0.748161	0.528407	0.930193	1.33927	1.32417	0.873785	0.710841	0.471859	0.450307	-0.0587536	-1.04207	-0.891484	-0.694351	0.514697	0.00125173	-0.500446	0.315433	0.84128	0.824923	0.225183	-0.0725695	-0.66374	-0.731189	0	0	0	0	0	0
Synpcc7942_0594	637799005		hypothetical protein	chromosome	-	581205	582881	0	0.128194	276.337	0		0.492125	0.341069	0.268657	0.259101	0.440023	0.565126	0.369111	0.401916	0.612901	0.775053	0.652177	0.421644	0.349937	0.315538	0.512605	-0.0163582	-0.360653	-0.412907	0.351159	0.712153	0.0976355	0.220475	0.829234	1.16787	0.918843	0.289604	0.0206736	-0.128607	0	0	0	0	0	0
Synpcc7942_0595	637799006		hypothetical protein	chromosome	-	582850	583398	1	0.30986	259.297	1	Dusk	1.13821	0.544878	0.473352	0.503159	1.15736	1.32155	0.718027	1.15798	1.93568	2.48696	1.55715	0.884981	0.731189	0.672438	0.617728	-0.445031	-0.64805	-0.55995	0.641804	0.833194	-0.0469256	0.642573	1.38381	1.74535	1.06987	0.254683	-0.0207196	-0.141562	0	0	1	51	0	0
Synpcc7942_0596	637799007		delta(24)-sterol C-methyltransferase	chromosome	+	583496	584428	0	0.0542253	46.7343	0		0.154203	0.46932	0.401978	0.258014	0.0986768	0.115121	0.153278	0.12021	0.0630935	0.0838023	0.122903	0.24066	0.198737	0.250307	0.117122	1.72286	1.4994	0.859736	-0.526929	-0.304561	0.108439	-0.242156	-1.17215	-0.76265	-0.210191	0.759286	0.483146	0.815984	0	0	0	0	0	0
Synpcc7942_0597	637799008	menB	naphthoate synthase	chromosome	-	584425	585264	0	0.131378	192.676	0		0.247114	0.233932	0.284597	0.356792	0.326314	0.214364	0.282072	0.308763	0.236055	0.205177	0.174168	0.202603	0.226518	0.263237	-0.0599266	-0.139019	0.143813	0.469976	0.341156	-0.26504	0.130955	0.261392	-0.125983	-0.328235	-0.564625	-0.346453	-0.185479	0.0312553	0	0	0	0	0	0
Synpcc7942_0598	637799009		Peptidoglycan-binding LysM	chromosome	+	585701	587473	0	0.655928	134.752	0		1.63987	1.72296	1.69935	1.9918	1.09478	1.30543	1.40097	2.20064	1.42155	1.51407	1.03301	2.63966	1.25825	1.40095	-0.169514	-0.0982069	-0.118118	0.110974	-0.752457	-0.49857	-0.396677	0.254822	-0.375638	-0.284671	-0.83624	0.517254	-0.551679	-0.396693	0	0	0	0	0	0
Synpcc7942_0599	637799010		putative transcriptional regulator, TetR family	chromosome	-	587802	588404	1	1.2345	351.21	1	Dusk	1.13005	0.413117	0.336263	0.304402	1.20871	1.58389	2.16421	0.377358	1.33717	1.78881	3.19212	1.21269	1.05129	1.31473	0.0606135	-1.39116	-1.68812	-1.83173	0.15769	0.547698	0.998062	-1.52177	0.303403	0.723222	1.55874	0.162433	-0.0436186	0.278986	1	32	0	0	0	0
Synpcc7942_0600	637799011	prkE	serine/threonine protein kinase	chromosome	-	588528	590060	1	0.110186	128.131	0		0.136806	0.150386	0.144263	0.115024	0.156054	0.16623	0.177968	0.114666	0.136924	0.179333	0.220789	0.149333	0.164648	0.175081	-0.17373	-0.0371867	-0.0971558	-0.423921	0.016184	0.107319	0.205753	-0.428425	-0.172486	0.21678	0.516809	-0.0473251	0.093527	0.182162	0	0	0	0	0	0
Synpcc7942_0601	637799012		hypothetical protein	chromosome	-	590130	590390	1	0.114875	85.519	0		0.0521066	0.0217368	0.0296662	0.0345872	0.037412	0.0645529	0.0384154	0.0681761	0.0593529	0.074087	0.0272696	0.0483782	0.0613719	0.0640431	0.201272	-1.06005	-0.611374	-0.389955	-0.276694	0.510288	-0.238508	0.589073	0.389126	0.709028	-0.732901	0.0941653	0.437385	0.49885	0	0	0	0	0	0
Synpcc7942_0602	637799013		hypothetical protein	chromosome	-	590846	591454	1	0.350782	138.634	1	Dawn	0.672292	0.494583	0.530813	0.694709	0.82459	0.72622	0.656817	0.851759	1.13067	0.733047	0.607722	0.730181	0.596184	0.629714	-0.150199	-0.593077	-0.491085	-0.10288	0.144389	-0.0388821	-0.183797	0.191157	0.599822	-0.0253817	-0.295877	-0.031034	-0.32353	-0.244592	0	0	0	0	0	0
Synpcc7942_0603	637799014	glgC, agp	glucose-1-phosphate adenylyltransferase	chromosome	-	591459	592751	1	0.425938	164.779	1	Dawn	1.46533	0.933783	1.12842	1.36282	1.68837	1.69884	1.36845	2.19479	2.60641	2.01111	1.13638	1.6597	1.27862	1.58011	-0.134193	-0.784256	-0.511112	-0.238826	0.0702183	0.0791313	-0.232879	0.448669	0.696649	0.322577	-0.500971	0.0455073	-0.330826	-0.0253917	0	0	0	0	1	108
Synpcc7942_0604	637799015	rpe, cbbE, ppe	ribulose-phosphate 3-epimerase	chromosome	+	592890	593633	1	0.292655	115.09	1	Dawn	2.70342	2.88102	3.54426	3.55428	2.83674	2.65944	2.43993	3.41863	3.09093	2.3233	1.91008	1.92884	2.81712	3.12737	-0.21601	-0.124215	0.174693	0.178764	-0.146562	-0.239672	-0.363952	0.122624	-0.0227503	-0.434619	-0.71716	-0.703062	-0.15657	-0.00584328	0	0	0	0	0	0
Synpcc7942_0605	637799016		hypothetical protein	chromosome	-	593711	594694	1	0.0902785	167.969	0		0.106203	0.0870074	0.0727862	0.105196	0.0751335	0.0866814	0.0954591	0.0948003	0.0708435	0.0700606	0.079564	0.0970771	0.0774463	0.0834792	-0.063774	-0.35139	-0.608864	-0.0775244	-0.563072	-0.356805	-0.217646	-0.227636	-0.647893	-0.663926	-0.480413	-0.193396	-0.519331	-0.411111	0	0	0	0	0	0
Synpcc7942_0606	637799017	aat	leucyl/phenylalanyl-tRNA--protein transferase	chromosome	-	594687	595367	0	0.108187	138.208	0		0.10826	0.0863378	0.0909589	0.0963261	0.0747651	0.0804067	0.103837	0.0910562	0.0693802	0.0641965	0.0685143	0.103187	0.083394	0.110103	0.240358	-0.0860826	-0.010861	0.0718516	-0.293711	-0.188759	0.180167	-0.0093179	-0.401552	-0.513581	-0.41967	0.171116	-0.136131	0.264701	0	0	0	0	0	0
Synpcc7942_0607	637799018		hypothetical protein	chromosome	+	595381	595707	0	0.111281	227.504	0		0.925917	0.121447	0.112473	0.237414	1.83645	1.61334	1.01345	0.415539	1.79308	2.03368	1.68079	0.399569	0.252347	0.397252	0.288227	-2.64233	-2.75308	-1.67525	1.27619	1.08932	0.418553	-0.867673	1.24172	1.42337	1.14841	-0.924211	-1.58725	-0.932601	0	0	0	0	1	109
Synpcc7942_0608	637799019		hypothetical protein	chromosome	+	595756	596298	0	0.141941	96.4266	0		0.837054	0.682924	0.73347	0.776932	1.08152	0.954116	0.864933	0.783495	1.1925	1.19374	1.12433	0.64908	0.702617	0.738796	0.167664	-0.125931	-0.0229186	0.0601317	0.537335	0.356509	0.214933	0.0722673	0.678263	0.67976	0.593338	-0.19926	-0.0849164	-0.0124802	0	0	0	0	0	0
Synpcc7942_0609	637799020	ndhD4	proton-translocating NADH-quinone oxidoreductase, chain M	chromosome	+	596382	597872	1	0.171138	137.355	0		0.403736	0.463522	0.623818	0.714431	0.557131	0.482369	0.463999	0.604307	0.514292	0.293775	0.29596	0.364887	0.437215	0.40615	-0.325008	-0.125783	0.302704	0.498373	0.139594	-0.0682853	-0.124299	0.25686	0.0241672	-0.78371	-0.77302	-0.47097	-0.21008	-0.316408	0	0	0	0	0	0
Synpcc7942_0610	637799021		hypothetical protein	chromosome	+	597977	599776	1	0.280791	142.3	1	Dawn	0.28671	0.363034	0.288476	0.251426	0.157317	0.191298	0.256817	0.342399	0.234518	0.247547	0.257016	0.46359	0.356766	0.221013	-0.562484	-0.221969	-0.553624	-0.751941	-1.4284	-1.14625	-0.721332	-0.306395	-0.852374	-0.77437	-0.720217	0.130775	-0.247095	-0.937944	0	0	0	0	0	0
Synpcc7942_0611	637799022	mutS	recombination and DNA strand exchange inhibitor protein	chromosome	+	599815	602205	0	0.102946	88.4767	0		0.170638	0.250004	0.273033	0.254721	0.165105	0.159869	0.171929	0.181316	0.166832	0.139242	0.137922	0.189425	0.187581	0.154599	-0.248038	0.302978	0.4301	0.329947	-0.295591	-0.342087	-0.237157	-0.16047	-0.280575	-0.541379	-0.555123	-0.0973473	-0.111461	-0.390444	0	0	0	0	0	0
Synpcc7942_0612	637799023	gltA	methylcitrate synthase	chromosome	-	602209	603369	0	0.279498	168.641	0		0.41985	0.488212	0.578965	0.68631	0.455966	0.448961	0.484526	0.678542	0.372267	0.315725	0.223418	0.581142	0.438153	0.530232	-0.538353	-0.320719	-0.0747524	0.170632	-0.419302	-0.441637	-0.331653	0.15421	-0.71189	-0.949559	-1.44848	-0.0693367	-0.476795	-0.201605	0	0	0	0	0	0
Synpcc7942_0613	637799024	sixA	phosphohistidine phosphatase, SixA	chromosome	-	603504	603992	0	0.106088	158.445	0		0.152231	0.160316	0.196937	0.232604	0.231062	0.157199	0.161873	0.181942	0.224922	0.144419	0.111588	0.129108	0.11316	0.15724	-0.22152	-0.146863	0.149946	0.390092	0.380497	-0.175192	-0.132921	0.0356968	0.34164	-0.297521	-0.669606	-0.459211	-0.649423	-0.17482	0	0	0	0	0	0
Synpcc7942_0614	637799025		hypothetical protein	chromosome	-	603996	605675	0	0.179569	108.267	0		0.336161	0.334627	0.434672	0.490409	0.450447	0.397389	0.376933	0.472452	0.611346	0.383331	0.281493	0.295735	0.274769	0.318954	-0.290906	-0.297506	0.0798704	0.253928	0.131298	-0.0495057	-0.125749	0.200108	0.57193	-0.101466	-0.546957	-0.475755	-0.58184	-0.366708	0	0	0	0	0	0
Synpcc7942_0615	637799026		Rhodanese-like	chromosome	+	605836	606180	1	0.13318	173.237	0		0.365151	0.412604	0.497956	0.561696	0.410393	0.21976	0.307446	0.451687	0.291861	0.175456	0.119196	0.259377	0.296865	0.379294	-0.157469	0.0187929	0.290055	0.463825	0.0110414	-0.890033	-0.40563	0.149359	-0.480681	-1.21486	-1.77263	-0.650914	-0.456155	-0.102646	0	0	0	0	0	0
Synpcc7942_0616	637799027	hrcA	heat-inducible transcription repressor	chromosome	+	606238	607299	0	0.114225	7.11646	0		0.258139	0.341408	0.349049	0.33661	0.216727	0.221114	0.217642	0.265036	0.171394	0.16387	0.170525	0.207292	0.224873	0.245085	0.0490849	0.452435	0.484366	0.432013	-0.203187	-0.174273	-0.197109	0.0871245	-0.541746	-0.606508	-0.549083	-0.267399	-0.149955	-0.0257806	0	0	0	0	0	0
Synpcc7942_0617	637799028		hypothetical protein	chromosome	-	607311	607688	1	0.143761	358.254	0		0.316231	0.185563	0.189475	0.191053	0.396707	0.390007	0.45232	0.265326	0.520469	0.438156	0.579515	0.374706	0.282506	0.379031	0.052758	-0.716314	-0.686212	-0.674246	0.379853	0.35528	0.569123	-0.200453	0.771591	0.523226	0.926625	0.29754	-0.10994	0.314095	0	0	0	0	0	0
Synpcc7942_0618	637799029	ahcY, sahH	S-adenosyl-L-homocysteine hydrolase	chromosome	+	607820	609100	0	0.17506	80.5809	0		2.30044	2.9826	3.36446	3.02036	2.4022	2.39704	2.5479	2.73857	2.19306	1.65389	1.68658	2.11538	2.7555	2.7361	-0.229533	0.145127	0.318932	0.163277	-0.167087	-0.170193	-0.0821333	0.0219786	-0.298497	-0.705582	-0.67734	-0.350525	0.0308722	0.0206797	0	0	0	0	0	0
Synpcc7942_0619	637799030		hypothetical protein	chromosome	+	609153	609788	0	0.113073	149.9	0		1.64539	1.97463	2.36182	2.18301	1.70857	1.58781	1.86025	1.84739	1.58565	1.16195	1.20612	1.56064	1.88892	1.85099	-0.0750484	0.1881	0.446418	0.332836	-0.02069	-0.126446	0.102014	0.0920086	-0.12841	-0.576936	-0.523106	-0.151339	0.124083	0.0948186	0	0	0	0	0	0
Synpcc7942_0620	637799031		hypothetical protein	chromosome	+	609866	610570	0	0.102824	324.112	0		0.97874	0.652558	0.823023	0.740107	1.7125	1.51157	1.14224	0.910158	1.87651	1.86152	1.99555	0.695385	0.898499	0.873867	0.0328068	-0.552013	-0.217186	-0.370385	0.839914	0.659854	0.255676	-0.0720025	0.971862	0.960293	1.0606	-0.460308	-0.090602	-0.130705	0	0	0	0	0	0
Synpcc7942_0621	637799032		hypothetical protein	chromosome	+	610715	611893	0	0.0812103	211.316	0		0.378835	0.321964	0.354635	0.344041	0.519402	0.571613	0.519202	0.330204	0.490749	0.567615	0.709657	0.337588	0.434345	0.420059	-0.0920143	-0.326685	-0.187248	-0.231002	0.363267	0.501455	0.362712	-0.290227	0.281401	0.491329	0.813537	-0.258321	0.105257	0.0570063	0	0	0	0	0	0
Synpcc7942_0622	637799033		ATPase	chromosome	+	611915	613912	0	0.0741147	337.356	0		0.480411	0.469549	0.473757	0.534647	0.596232	0.603984	0.613809	0.516811	0.584987	0.538604	0.636454	0.4454	0.535199	0.562434	-0.0948439	-0.127838	-0.114966	0.0594753	0.216761	0.235397	0.258676	0.0105254	0.189292	0.0701116	0.310943	-0.204011	0.0609628	0.132571	0	0	0	0	0	0
Synpcc7942_0623	637799035	trxB	thioredoxin reductase	chromosome	+	613972	615351	1	0.147648	213.993	0		0.315877	0.397654	0.401521	0.443949	0.366928	0.368557	0.278002	0.559529	0.890178	0.707307	0.525493	0.315469	0.338019	0.295545	0.0301172	0.362271	0.376232	0.52115	0.246251	0.252641	-0.15415	0.854969	1.52485	1.19309	0.764426	0.0282543	0.127858	-0.0658663	0	0	0	0	0	0
Synpcc7942_0624	637799036	ldpA	light dependent period	chromosome	+	615361	616419	0	0.0336446	325.172	0		0.444067	0.447572	0.423153	0.387004	0.535448	0.57573	0.536178	0.372712	0.778213	0.704972	0.816207	0.470709	0.447811	0.369346	-0.226157	-0.214816	-0.295757	-0.424586	0.0438119	0.148456	0.0457758	-0.478872	0.583229	0.440631	0.652001	-0.142099	-0.214045	-0.491964	0	0	0	0	0	0
Synpcc7942_0625	637799037	ycf45	Single-stranded nucleic acid binding R3H	chromosome	+	616419	618185	0	0.0896183	24.507	0		0.514049	0.561872	0.472701	0.386907	0.464188	0.482112	0.440801	0.455598	0.520315	0.553348	0.643574	0.565454	0.508196	0.448659	0.0377155	0.166051	-0.083263	-0.372204	-0.109482	-0.0548219	-0.184064	-0.136428	0.055196	0.143995	0.361916	0.17522	0.0211951	-0.158571	0	0	0	0	0	0
Synpcc7942_0626	637799038	ilvD	dihydroxy-acid dehydratase	chromosome	+	618362	620221	0	0.11704	130.94	0		0.659595	0.71152	0.779491	0.877812	0.928829	0.845246	0.751272	0.909701	1.06939	0.757558	0.737246	0.580274	0.671725	0.828317	-0.250353	-0.14103	-0.00940173	0.161978	0.24348	0.107437	-0.0625978	0.213459	0.446777	-0.0505774	-0.0897873	-0.435199	-0.224062	0.0782487	0	0	0	0	0	0
Synpcc7942_0627	637799039		hypothetical protein	chromosome	+	620462	621226	0	0.109038	87.9923	0		0.0982443	0.374175	0.528211	0.383118	0.0437626	0.0426713	0.0951941	0.0930403	0.0253123	0.0384646	0.0372149	0.0696102	0.154185	0.126106	-0.294743	1.63453	2.13193	1.6686	-1.46142	-1.49785	-0.340244	-0.37326	-2.25128	-1.64758	-1.69523	-0.791817	0.355471	0.0654458	0	0	0	0	0	0
Synpcc7942_0628	637799040		spermidine synthase	chromosome	+	621277	622137	0	0.078877	236.018	0		0.321727	0.599018	0.730672	0.744408	0.409083	0.352229	0.356095	0.43713	0.33825	0.32223	0.292079	0.292028	0.572215	0.435423	-0.00604189	0.890722	1.17735	1.20422	0.340514	0.124636	0.140382	0.436186	0.0662099	-0.00378851	-0.145519	-0.145769	0.824679	0.43054	0	0	0	0	0	0
Synpcc7942_0629	637799041		hypothetical protein	chromosome	-	622134	622340	0	0.228249	183.793	0		0.107194	0.0797302	0.079486	0.0901272	0.0909738	0.0559575	0.0739299	0.143269	0.224509	0.255873	0.148995	0.17504	0.0633125	0.0784429	-0.40659	-0.833617	-0.838042	-0.656781	-0.643292	-1.34441	-0.942586	0.0119076	0.659957	0.848615	0.0684452	0.300866	-1.16625	-0.857101	0	0	0	0	0	0
Synpcc7942_0630	637799042		hypothetical protein	chromosome	+	622432	623574	1	0.401921	247.32	0		0.354446	0.193126	0.201108	0.23325	0.23798	0.28191	0.21099	0.508076	0.444539	0.701709	0.4345	0.55283	0.269664	0.223539	0.152062	-0.723959	-0.665531	-0.451624	-0.422659	-0.178265	-0.596326	0.671541	0.478809	1.13737	0.445854	0.793335	-0.242337	-0.512978	0	0	0	0	0	0
Synpcc7942_0631	637799043	rplL, rpl12	50S ribosomal protein L7/L12	chromosome	-	623876	624262	1	0.286372	52.9995	1	Dawn	11.6652	28.2906	57.6214	64.3245	33.7613	19.3815	13.0658	22.8684	16.0895	8.07706	4.17274	3.27407	8.22288	19.6165	-0.389638	0.888474	1.91476	2.07352	1.14352	0.342836	-0.226046	0.581509	0.0742768	-0.919944	-1.87278	-2.22269	-0.89413	0.360223	0	0	0	0	0	0
Synpcc7942_0632	637799044	rplJ, rpl10	50S ribosomal protein L10	chromosome	-	624322	624849	1	0.269776	40.8625	1	Dawn	10.1985	26.1218	52.335	56.3337	26.4086	15.2309	11.6645	20.0509	12.8623	5.73382	3.43137	2.91754	8.12946	17.1883	-0.382806	0.974091	1.97661	2.08284	0.989844	0.195835	-0.189038	0.592503	-0.0480133	-1.2136	-1.95431	-2.18834	-0.709931	0.370264	0	0	0	0	0	0
Synpcc7942_0633	637799045	rplA, rpl1	50S ribosomal protein L1	chromosome	-	625078	625791	0	0.187708	80.1419	0		7.01244	17.0286	28.0157	27.4577	11.5873	8.18818	7.736	10.6936	5.77445	3.56072	3.53764	3.26163	6.86625	10.1415	-0.257643	1.02233	1.74061	1.71158	0.466915	-0.0340164	-0.115971	0.351117	-0.537875	-1.23539	-1.24477	-1.36196	-0.288037	0.274644	0	0	0	0	0	0
Synpcc7942_0634	637799046	rplK, rpl11	50S ribosomal protein L11	chromosome	-	625866	626291	0	0.251895	56.5425	0		5.37003	14.3867	21.4122	20.8319	8.15347	6.74822	6.36964	9.41594	4.28915	3.64512	3.41388	3.12768	6.56652	8.35314	-0.290802	1.13093	1.70463	1.66499	0.311683	0.0387749	-0.04452	0.519374	-0.615041	-0.849764	-0.944318	-1.07064	-0.000602689	0.346588	0	0	0	0	0	0
Synpcc7942_0635	637799047	nusG	transcription antitermination protein NusG	chromosome	-	626299	626916	0	0.170555	103.667	0		8.84069	20.641	30.1516	29.5329	12.0905	10.9937	10.3825	13.3948	7.48988	6.21294	6.72195	5.35663	10.9615	11.407	-0.168833	1.05445	1.60117	1.57126	0.282814	0.145606	0.0630892	0.430606	-0.40805	-0.677715	-0.564112	-0.891666	0.141377	0.198858	0	0	0	0	0	0
Synpcc7942_0636	637799048	secE	preprotein translocase subunit SecE	chromosome	-	626925	627170	0	0.162772	97.974	0		8.7523	18.4246	28.0148	26.9032	12.2935	10.5173	10.3847	11.0209	8.43825	5.88167	6.77339	6.02771	10.7359	10.4019	-0.0948863	0.979014	1.58357	1.52516	0.39528	0.17015	0.151834	0.237628	-0.147605	-0.668323	-0.464671	-0.632939	0.199827	0.154226	0	0	0	0	1	113
Synpcc7942_0637	637799049	clpB, clpBII	ATPase	chromosome	-	627275	629962	0	0.0937269	76.5659	0		0.436445	0.481026	0.54298	0.579428	0.477172	0.514757	0.515338	0.49187	0.545474	0.458521	0.495144	0.422974	0.517539	0.503696	-0.118036	0.0222792	0.197065	0.290795	0.0106757	0.120056	0.121685	0.0544409	0.203675	-0.0468462	0.0640121	-0.163266	0.127833	0.0887191	0	0	0	0	0	0
Synpcc7942_0638	637799050	gloA	Glyoxalase I	chromosome	-	630050	630463	0	0.132791	257.045	0		0.594754	0.483364	0.439511	0.520412	0.732844	0.676577	0.689587	0.703319	1.23293	1.05192	1.09454	0.698832	0.64485	0.73944	-0.323067	-0.622249	-0.759462	-0.515706	-0.0218534	-0.137106	-0.109627	-0.0811818	0.728656	0.499598	0.556889	-0.0904138	-0.206397	-0.00892833	0	0	0	0	0	0
Synpcc7942_0639	637799051	eno	phosphopyruvate hydratase	chromosome	+	630677	631969	1	0.416774	127.001	1	Dawn	1.49079	2.76425	4.11097	4.26904	1.71427	1.64997	2.00063	2.78446	1.16093	0.849179	0.724763	2.49189	2.53622	2.45512	-0.616332	0.274478	0.847066	0.901499	-0.414821	-0.469969	-0.191957	0.284988	-0.977125	-1.42827	-1.65683	0.124827	0.150269	0.103379	0	0	0	0	0	0
Synpcc7942_0640	637799052		ATPase	chromosome	+	632225	633991	0	0.0783747	215.004	0		0.228061	0.457087	0.545824	0.339565	0.25183	0.27711	0.278338	0.254805	0.272212	0.247412	0.312389	0.269368	0.340079	0.299466	-0.214454	0.788593	1.04456	0.359814	-0.0714259	0.0665849	0.0729607	-0.0544785	0.0408571	-0.0969563	0.239467	0.0257017	0.361997	0.17852	0	0	0	0	0	0
Synpcc7942_0641	637799053	sdhA	succinate dehydrogenase flavoprotein subunit	chromosome	-	634089	635996	0	0.105729	61.4696	0		0.172192	0.207599	0.197072	0.192405	0.198127	0.198131	0.204666	0.161933	0.122191	0.137477	0.179053	0.169185	0.189783	0.199742	-0.140246	0.129535	0.0544553	0.0198783	0.062159	0.0621865	0.109004	-0.228871	-0.635124	-0.465073	-0.0838799	-0.165666	8.16821e-05	0.073871	0	0	0	0	0	0
Synpcc7942_0642	637799054	prxQ, prxQ-B, bcp	bacterioferritin comigratory protein	chromosome	-	636125	636670	0	0.101158	325.289	0		0.391975	0.618717	0.553949	0.443096	0.472642	0.441651	0.461018	0.535261	0.560347	0.709844	0.773437	0.571108	0.621414	0.57292	-0.3827	0.275819	0.116292	-0.20584	-0.112714	-0.210555	-0.148637	0.0667817	0.13286	0.474042	0.597824	0.160304	0.282094	0.164872	1	33	0	0	0	0
Synpcc7942_0643	637799055		hypothetical protein	chromosome	+	636762	636965	0	0.179748	106.918	0		0.526309	0.487945	0.400902	0.463163	0.611992	0.469729	0.584616	0.422911	0.626479	0.696484	0.600866	0.462872	0.502052	0.568881	-0.345763	-0.454955	-0.738421	-0.530152	-0.12816	-0.509844	-0.194183	-0.66132	-0.094407	0.0584184	-0.154628	-0.531059	-0.413836	-0.233547	0	0	0	0	0	0
Synpcc7942_0644	637799056	cikA, sccikA	GAF sensor hybrid histidine kinase	chromosome	+	637075	639339	1	0.644734	356.419	1	Dusk	0.648152	0.54399	0.481152	0.483579	0.663285	0.719214	0.699182	0.354951	0.854576	1.033	1.02195	0.493241	0.650195	0.687587	0.464213	0.211462	0.0343735	0.0416335	0.49751	0.614302	0.573548	-0.4045	0.863089	1.13665	1.12114	0.070173	0.468753	0.549423	1	33	0	0	0	0
Synpcc7942_0645	637799057	hemL	glutamate-1-semialdehyde aminotransferase	chromosome	+	639397	640758	0	0.0915775	219.42	0		3.37131	1.80363	2.30204	2.92248	6.4892	5.34937	3.8249	3.7238	7.0836	4.79251	4.52717	1.85737	2.52534	2.78482	-0.0360677	-0.938477	-0.586465	-0.242184	0.908662	0.62999	0.146045	0.107399	1.0351	0.471404	0.389231	-0.896118	-0.452899	-0.311792	0	0	0	0	0	0
Synpcc7942_0646	637799058		hypothetical protein	chromosome	+	640765	640992	0	0.0972698	280.527	0		2.49895	1.47035	1.802	2.01398	3.53627	3.13596	2.79592	2.28219	4.04264	2.93886	3.63846	1.659	2.04164	2.06951	0.122376	-0.642783	-0.349347	-0.1889	0.623284	0.449962	0.284376	-0.00852906	0.81635	0.356308	0.66438	-0.46863	-0.169215	-0.149658	0	0	0	0	0	0
Synpcc7942_0647	637799059		hypothetical protein	chromosome	+	641196	641738	1	0.638116	351.631	1	Dusk	0.991283	0.726616	0.628306	0.512043	0.753982	1.16937	1.53258	0.388272	0.562016	0.947559	2.09137	1.00799	1.04856	1.05366	0.106896	-0.341207	-0.550932	-0.846134	-0.287869	0.345265	0.735494	-1.24533	-0.711788	0.0418162	1.18398	0.131016	0.187941	0.194942	0	0	0	0	0	0
Synpcc7942_0648	637799060		hypothetical protein	chromosome	+	641843	642694	1	0.683833	10.1666	0		0.348649	0.337783	0.251621	0.133502	0.185827	0.404151	0.533281	0.105058	0.11182	0.316753	0.555986	0.397565	0.402218	0.404709	0.749988	0.704311	0.279464	-0.634928	-0.157825	0.96311	1.36311	-0.980606	-0.890613	0.611571	1.42326	0.939405	0.956191	0.965098	0	0	0	0	0	0
Synpcc7942_0649	637799061	rpoD1, sigA	RNA polymerase sigma factor RpoD	chromosome	-	642767	643966	1	0.175427	318.128	1	Dusk	9.94457	10.5988	7.96427	7.47908	7.00953	8.96207	9.06907	7.53098	4.44659	7.02077	8.67593	7.32716	9.89399	8.06073	0.224342	0.316257	-0.0960245	-0.186705	-0.280249	0.0742645	0.0913885	-0.176729	-0.936866	-0.277938	0.0274515	-0.216313	0.216986	-0.0786557	0	0	0	0	1	115
Synpcc7942_0650	637799062	nat	hypothetical protein	chromosome	-	644174	644659	0	0.20811	119.986	0		0.11046	0.130531	0.0587486	0.0742984	0.0932825	0.0975017	0.0694922	0.125372	0.125905	0.181638	0.123667	0.177348	0.137829	0.0864752	0.585156	0.826022	-0.325738	0.0130376	0.341312	0.405134	-0.0834429	0.767851	0.773971	1.3027	0.748094	1.26822	0.904508	0.231992	0	0	0	0	0	0
Synpcc7942_0651	637799063	priA	primosome assembly protein PriA	chromosome	+	644741	647161	0	0.167146	289.611	0		0.0910616	0.0609277	0.0481731	0.0594111	0.0702939	0.0852506	0.0856624	0.0661486	0.103658	0.11807	0.139806	0.0861691	0.0753858	0.0765388	0.0421739	-0.537572	-0.876442	-0.573936	-0.331269	-0.0529597	-0.0460076	-0.418959	0.22909	0.416899	0.660684	-0.0374985	-0.230377	-0.208477	0	0	0	0	0	0
Synpcc7942_0652	637799064		hypothetical protein	chromosome	-	647124	648713	0	0.122806	179.636	0		0.261102	0.292261	0.259313	0.271007	0.235998	0.292726	0.251573	0.245188	0.213368	0.184008	0.269574	0.257921	0.268036	0.254709	0.015662	0.178306	0.0057436	0.0693781	-0.130178	0.180599	-0.0379735	-0.0750611	-0.275607	-0.489183	0.0617311	-0.00202412	0.0534765	-0.020104	0	0	0	0	0	0
Synpcc7942_0653	637799065	cdv1, ppiB	Peptidyl-prolyl cis-trans isomerase (rotamase) - cyclophilin family-like	chromosome	-	648710	649441	1	0.164127	111.77	1	Dawn	0.59355	0.696833	0.587723	0.637992	0.617429	0.716398	0.71298	0.792611	0.822172	0.707497	0.70655	0.611237	0.706875	0.681789	-0.164443	0.0670008	-0.178675	-0.0602732	-0.107539	0.10695	0.100051	0.252801	0.305628	0.088912	0.0869806	-0.122081	0.0876427	0.0355145	0	0	0	0	0	0
Synpcc7942_0654	637799066	ycf4	photosystem I assembly protein Ycf4	chromosome	-	649443	650009	1	0.0920629	201.317	0		0.564292	0.632186	0.560744	0.658072	0.592907	0.685298	0.676618	0.713242	0.497246	0.498208	0.488159	0.547051	0.553026	0.570231	0.229393	0.393301	0.220293	0.451196	0.300758	0.509682	0.491293	0.567343	0.0469093	0.0497003	0.0203023	0.184628	0.200299	0.244497	0	0	0	0	0	0
Synpcc7942_0655	637799067	psbDI, psbD, psbD1	photosystem II D2 protein (photosystem q(a) protein)	chromosome	+	650232	651290	1	0.269788	255.918	0		0.100709	0.0545463	0.0516374	0.0556922	0.0935223	0.186938	0.0772375	0.0565179	0.0848427	0.103999	0.0575004	0.0839812	0.0485854	0.063136	-0.277873	-1.16252	-1.24158	-1.13252	-0.384688	0.61449	-0.660698	-1.11129	-0.525208	-0.231498	-1.08643	-0.539933	-1.32947	-0.951536	0	0	0	0	0	0
Synpcc7942_0656	637799068	psbC	photosystem II 44 kDa subunit reaction center protein	chromosome	+	651274	652659	1	0.330517	175.982	1	Dawn	23.8996	19.7639	20.7852	23.5212	28.0632	24.2217	17.23	22.6095	24.5119	21.1019	17.1932	9.18149	9.27996	10.934	0.194621	-0.079498	-0.0068074	0.171598	0.426313	0.213935	-0.277441	0.114564	0.231119	0.0150053	-0.280532	-1.18557	-1.17018	-0.933544	0	0	0	0	0	0
Synpcc7942_0657	637799069		hypothetical protein	chromosome	-	653047	653388	0	0.383151	162.147	0		7.16617	3.34185	2.9814	3.26776	5.95089	7.23257	7.28142	3.76975	8.36384	11.2933	11.4622	5.63114	4.02935	4.53002	-0.242765	-1.34332	-1.50798	-1.37566	-0.510861	-0.229457	-0.219746	-1.1695	-0.0198013	0.413425	0.434849	-0.59054	-1.07342	-0.904451	1	34	0	0	0	0
Synpcc7942_0658	637799070		hypothetical protein	chromosome	-	653558	653770	0	0.29206	135.745	0		1.16944	0.922547	1.21323	1.26014	1.34581	1.06291	1.07771	0.939189	1.21092	0.990715	0.772254	0.701055	0.868244	1.11435	-0.244949	-0.587076	-0.191915	-0.137183	-0.0422911	-0.382756	-0.362801	-0.561283	-0.194661	-0.484228	-0.843623	-0.983171	-0.674599	-0.314568	0	0	0	0	0	0
Synpcc7942_0659	637799071		Rad3-related DNA helicases-like	chromosome	-	653854	655275	0	0.107101	209.096	0		0.120807	0.103369	0.108901	0.0977636	0.120659	0.095527	0.0961153	0.118687	0.157961	0.141304	0.158497	0.145934	0.100356	0.118219	-0.586672	-0.811574	-0.736353	-0.892004	-0.588441	-0.925392	-0.916534	-0.612209	-0.1998	-0.360574	-0.194915	-0.314061	-0.854243	-0.617908	0	0	0	0	0	0
Synpcc7942_0660	637799072	tyrA	arogenate dehydrogenase	chromosome	+	655282	656253	1	0.185404	51.9173	0		0.240802	0.288122	0.285777	0.352298	0.355908	0.303339	0.342575	0.203036	0.32831	0.249969	0.297777	0.185255	0.24919	0.270235	-0.278016	-0.0191847	-0.0309746	0.270932	0.28564	0.0550635	0.230553	-0.524129	0.169191	-0.224116	0.0283665	-0.656352	-0.22862	-0.111652	0	0	0	0	0	0
Synpcc7942_0661	637799073		hypothetical protein	chromosome	+	656270	657874	0	0.0845783	12.3239	0		0.22343	0.19377	0.185129	0.15711	0.202504	0.222413	0.238043	0.174698	0.209444	0.222622	0.262128	0.213438	0.196578	0.180022	-0.0490565	-0.25454	-0.320347	-0.557107	-0.190931	-0.0556387	0.0423422	-0.404021	-0.142319	-0.0542833	0.181388	-0.115062	-0.233781	-0.360709	0	0	0	0	0	0
Synpcc7942_0662	637799074		hypothetical protein	chromosome	+	657943	658857	0	0.428102	336.48	0		1.29936	0.301562	0.310984	0.376218	2.42017	2.28442	1.43029	0.780825	2.60047	3.18006	3.06129	0.736784	0.718811	0.757341	0.441277	-1.66599	-1.62161	-1.34688	1.33859	1.25531	0.579784	-0.293449	1.44226	1.73253	1.67762	-0.377206	-0.412836	-0.337505	0	0	0	0	0	0
Synpcc7942_0663	637799075	cya2	putative adenylate/guanylate cyclase	chromosome	+	658977	660875	0	0.066747	68.4271	0		0.182808	0.0991314	0.0909757	0.114089	0.190986	0.182989	0.187018	0.113862	0.150914	0.172218	0.219463	0.172878	0.118601	0.133038	0.157661	-0.725258	-0.849119	-0.522517	0.220794	0.159085	0.190502	-0.525387	-0.118946	0.0715674	0.421308	0.0770803	-0.466552	-0.300833	0	0	0	0	0	0
Synpcc7942_0664	637799076		Cyclic nucleotide-binding	chromosome	+	660875	662224	0	0.0681539	351.386	0		0.110813	0.0813747	0.0652409	0.0753386	0.110561	0.0998418	0.108668	0.075889	0.0969629	0.114588	0.124188	0.128504	0.102113	0.0909168	-0.0214018	-0.466882	-0.785685	-0.578072	-0.0246874	-0.171818	-0.0496003	-0.567571	-0.214029	0.0269219	0.142989	0.192278	-0.139367	-0.306914	0	0	0	0	0	0
Synpcc7942_0665	637799077		hypothetical protein	chromosome	-	662232	662978	1	0.124839	183.576	0		0.291295	0.191941	0.209249	0.223969	0.290377	0.262197	0.270564	0.295231	0.314177	0.309504	0.268899	0.315282	0.254719	0.272354	-0.0953833	-0.6972	-0.572639	-0.47456	-0.0999335	-0.247209	-0.201891	-0.0760196	0.0137159	-0.00790208	-0.210797	0.0187816	-0.288955	-0.192379	0	0	0	0	0	0
Synpcc7942_0666	637799078		Heat shock protein DnaJ-like	chromosome	+	663141	663761	0	0.108274	310.681	0		0.132552	0.112951	0.111436	0.119201	0.102205	0.113611	0.11047	0.105064	0.114749	0.139444	0.13244	0.167967	0.151637	0.144581	-0.135615	-0.366472	-0.385952	-0.288781	-0.510704	-0.358073	-0.398517	-0.470907	-0.34369	-0.0624834	-0.136836	0.206009	0.0584545	-0.0102933	0	0	0	0	0	0
Synpcc7942_0667	637799079		hypothetical protein	chromosome	+	663985	664296	0	0.192821	137.15	0		4.94622	2.74408	2.6492	2.57123	3.61475	3.38518	3.97133	2.88789	5.35982	4.50274	5.43687	4.22474	3.33865	3.48541	0.200853	-0.649151	-0.699915	-0.743018	-0.251578	-0.346239	-0.115852	-0.575458	0.316712	0.0653287	0.337303	-0.02661	-0.366207	-0.304147	0	0	0	0	1	118
Synpcc7942_0668	637799080		hypothetical protein	chromosome	-	664306	664446	1	0.512213	317.307	1	Dusk	1.37064	0.398704	0.271138	0.409748	1.76592	1.35922	0.756005	0.512442	1.61503	3.70874	1.8845	0.46333	0.430316	0.619836	0.862597	-0.918865	-1.47516	-0.879447	1.22817	0.850519	0.00421217	-0.556796	1.09931	2.29867	1.32193	-0.702143	-0.808788	-0.282296	0	0	0	0	0	0
Synpcc7942_0669	637799081	mpg	DNA-3-methyladenine glycosylase	chromosome	+	664540	665124	0	0.078952	196.198	0		0.259394	0.25391	0.278777	0.277762	0.184799	0.163803	0.208376	0.164989	0.152263	0.0962884	0.121664	0.305932	0.264686	0.29716	0.161893	0.131067	0.265858	0.260598	-0.327296	-0.50129	-0.154059	-0.490877	-0.606685	-1.26782	-0.930345	0.399959	0.191032	0.35799	0	0	0	0	0	0
Synpcc7942_0670	637799082	pyrB	aspartate carbamoyltransferase catalytic subunit	chromosome	+	665121	666137	1	0.173944	323.617	0		0.247039	0.244438	0.21508	0.210074	0.165965	0.193623	0.25581	0.154818	0.118811	0.154588	0.248832	0.241296	0.228618	0.201926	0.188547	0.173279	-0.0113202	-0.0452956	-0.38531	-0.162943	0.238883	-0.485622	-0.867525	-0.487765	0.198977	0.154609	0.076748	-0.102365	0	0	0	0	0	0
Synpcc7942_0671	637799083		hypothetical protein	chromosome	+	666156	666653	1	0.153252	355.041	0		0.385199	0.335551	0.286665	0.271905	0.266101	0.300258	0.441875	0.195978	0.253519	0.278554	0.427169	0.38363	0.294357	0.291534	0.0435715	-0.155498	-0.382665	-0.458927	-0.490056	-0.315827	0.241605	-0.931338	-0.559937	-0.424075	0.192774	0.0376844	-0.344466	-0.358367	0	0	0	0	0	0
Synpcc7942_0672	637799084	rpoD3, sigD	RNA polymerase sigma factor SigD	chromosome	+	666887	667849	1	0.238293	26.3615	1	Dusk	0.18582	2.94778	1.49601	0.834295	0.038386	0.0623282	0.130968	0.285004	0.160863	0.109129	0.0821202	0.393356	0.370978	0.430466	0.377006	4.36466	3.38615	2.54366	-1.89825	-1.19895	-0.127692	0.994078	0.168931	-0.390873	-0.801093	1.45893	1.37443	1.589	0	0	1	52	0	0
Synpcc7942_0673	637799085	mutT, mutY	A/G-specific DNA-adenine glycosylase	chromosome	+	667849	668931	1	0.0833915	83.5566	0		0.183737	0.941979	0.531742	0.373427	0.171307	0.154598	0.178826	0.15783	0.142324	0.128089	0.144582	0.160692	0.182416	0.183447	0.397283	2.75534	1.93037	1.42047	0.296231	0.148168	0.358197	0.178015	0.028819	-0.123215	0.0515275	0.203939	0.386873	0.395004	0	0	0	0	0	0
Synpcc7942_0674	637799086	hemF	coproporphyrinogen III oxidase	chromosome	+	669347	670300	1	0.40482	165.456	1	Dawn	1.36553	0.424389	0.702053	1.10396	3.41129	2.41289	1.51895	1.58485	3.20133	2.07538	1.32632	0.462669	0.795256	1.00372	-0.244682	-1.93069	-1.2045	-0.551456	1.07617	0.576616	-0.0910689	-0.0297996	0.984526	0.359228	-0.286719	-1.80609	-1.02466	-0.688795	0	0	1	53	0	0
Synpcc7942_0675	637799087		hypothetical protein	chromosome	-	670297	670818	0	0.0667917	160.809	0		0.434679	0.577013	0.538627	0.509585	0.407523	0.40749	0.456941	0.38943	0.299732	0.315675	0.443888	0.350216	0.462149	0.495877	-0.090841	0.317814	0.218495	0.138532	-0.183908	-0.184025	-0.0187815	-0.249425	-0.627116	-0.552349	-0.0605939	-0.402543	-0.00243153	0.0991917	0	0	0	0	0	0
Synpcc7942_0676	637799088		hypothetical protein	chromosome	+	670914	672119	0	0.12962	194.688	0		0.12998	0.123165	0.128406	0.145714	0.177547	0.163279	0.161462	0.146651	0.116248	0.109448	0.106229	0.101057	0.134027	0.164341	-0.132822	-0.210514	-0.1504	0.032025	0.317092	0.196229	0.180088	0.0412772	-0.29391	-0.380867	-0.42393	-0.495935	-0.0885842	0.205581	0	0	0	0	0	0
Synpcc7942_0677	637799089	pex	transcriptional regulator, PadR family	chromosome	-	672082	672462	1	0.487883	0.33089	1	Dusk	2.8556	1.13439	0.89673	0.987233	2.16013	2.44046	2.86568	1.29213	3.14701	4.76412	5.72668	1.47694	1.58104	1.95669	0.198074	-1.13381	-1.47298	-1.33426	-0.204604	-0.0285689	0.203156	-0.945976	0.338261	0.936487	1.20198	-0.753115	-0.654848	-0.347304	0	0	1	54	1	121
Synpcc7942_0678	637799090	rnd	3 -5 exonuclease	chromosome	+	672767	673402	0	0.151499	203.932	0		0.282485	0.238415	0.324141	0.348221	0.394792	0.359285	0.316126	0.362865	0.370228	0.335762	0.271066	0.220113	0.258725	0.33866	-0.303503	-0.548204	-0.105055	-0.00167478	0.179413	0.0434482	-0.141179	0.057755	0.0867341	-0.0542405	-0.363033	-0.663434	-0.430258	-0.0418399	0	0	0	0	0	0
Synpcc7942_0679	637799091	rbp1, 12rnp1	RNA-binding region RNP-1	chromosome	+	673785	674108	0	0.225946	111.666	0		20.1611	15.1097	18.4058	18.309	19.5183	23.2022	19.0349	14.5953	13.5045	15.5768	19.4019	12.3997	23.0413	20.6685	-0.107205	-0.523306	-0.238625	-0.246229	-0.153956	0.0954776	-0.190135	-0.573276	-0.685339	-0.479383	-0.162585	-0.808479	0.0854426	-0.0713446	0	0	0	0	1	122
Synpcc7942_0680	637799092		C-5 sterol desaturase	chromosome	+	674334	675149	1	0.593273	322.331	1	Dusk	0.789463	0.252189	0.259163	0.309021	1.70435	1.30853	0.778626	0.50485	1.74085	2.244	1.91986	0.535532	0.585331	0.520303	0.970678	-0.675688	-0.636332	-0.382487	2.08095	1.69968	0.950736	0.32566	2.11153	2.47781	2.25274	0.41078	0.539058	0.369159	0	0	0	0	0	0
Synpcc7942_0681	637799093	ispD	2-C-methyl-D-erythritol 4-phosphate cytidylyltransferase	chromosome	-	675164	675862	0	0.203851	108.938	0		0.352258	0.467057	0.459006	0.491613	0.282379	0.293761	0.359354	0.374131	0.339076	0.24416	0.243241	0.34243	0.301376	0.308821	-0.264597	0.142369	0.117284	0.216295	-0.583597	-0.526588	-0.235824	-0.177687	-0.319621	-0.793405	-0.79884	-0.305419	-0.489664	-0.45446	0	0	0	0	0	0
Synpcc7942_0682	637799094		hypothetical protein	chromosome	+	675946	676905	1	0.144405	189.098	0		0.682228	0.845623	1.13119	1.1259	0.939399	0.717369	0.788811	0.935194	0.701941	0.500057	0.471196	0.621614	0.712925	0.740745	-0.285619	0.0241427	0.443891	0.437134	0.175866	-0.213157	-0.0761921	0.169394	-0.244522	-0.733779	-0.819546	-0.419852	-0.222121	-0.166896	0	0	0	0	1	123
Synpcc7942_0683	637799095		potassium channel protein	chromosome	+	676942	677967	0	0.08346	81.3908	0		0.293009	0.424266	0.423556	0.500341	0.317462	0.293531	0.337917	0.335299	0.20987	0.1983	0.205027	0.240784	0.349145	0.316524	-0.12066	0.413363	0.410947	0.651306	-0.00502027	-0.118091	0.0850636	0.0738413	-0.602112	-0.683921	-0.635794	-0.403866	0.132218	-0.00929193	0	0	0	0	0	0
Synpcc7942_0684	637799096	fabG	3-oxoacyl-acyl-carrier-protein reductase	chromosome	+	678025	678774	0	0.0966953	289.376	0		0.44951	0.571456	0.644594	0.785572	0.359892	0.414187	0.40176	0.748425	0.436849	0.328444	0.196123	0.494821	0.478277	0.485857	-0.256727	0.089564	0.263312	0.548664	-0.577514	-0.374796	-0.418744	0.478778	-0.297944	-0.709432	-1.45332	-0.118172	-0.167233	-0.144548	0	0	0	0	0	0
Synpcc7942_0685	637799097	groEL, groEL2, groEL-2, groL	chaperonin GroEL	chromosome	+	678881	680548	0	0.304398	319.579	0		1.54699	10.7232	4.46532	5.09524	0.707083	0.627518	1.39614	2.64239	0.563271	0.365928	0.275933	1.44027	5.92922	1.53323	-0.134038	2.65916	1.39526	1.58564	-1.26355	-1.43578	-0.282058	0.638339	-1.59161	-2.21388	-2.62112	-0.237166	1.80434	-0.146928	0	0	0	0	1	124
Synpcc7942_0686	637799098		FO synthase subunit 2	chromosome	+	680978	682138	1	0.433663	305.144	1	Dusk	2.16337	2.38109	0.817387	0.889508	1.83047	1.95457	1.25495	1.27349	3.69598	5.18484	4.12233	1.66588	1.3964	0.959682	0.906506	1.04485	-0.497683	-0.375694	0.665443	0.760077	0.120857	0.142009	1.67919	2.16753	1.83669	0.52951	0.274941	-0.266144	0	0	0	0	1	125
Synpcc7942_0687	637799099		hypothetical protein	chromosome	+	682128	683747	1	0.34555	336.284	1	Dusk	1.00121	1.56032	0.624926	0.599588	0.764629	0.988667	0.793188	0.628414	0.82428	1.22372	1.42982	0.928874	0.927945	0.610829	0.355653	0.99575	-0.324331	-0.384045	-0.0332572	0.337468	0.019646	-0.316302	0.0751171	0.645189	0.869742	0.247466	0.246022	-0.357249	0	0	0	0	0	0
Synpcc7942_0688	637799100		transcriptional regulator, ArsR family	chromosome	+	683722	684060	1	0.203001	315.472	0		0.209033	0.530969	0.206991	0.147348	0.25512	0.260925	0.175902	0.157469	0.155368	0.337283	0.368582	0.208907	0.27921	0.154967	0.157058	1.50195	0.142892	-0.34745	0.444504	0.476962	-0.0919001	-0.251608	-0.270983	0.847285	0.975311	0.156187	0.574678	-0.274716	0	0	0	0	0	0
Synpcc7942_0689	637799101		hypothetical protein	chromosome	-	684051	684884	0	0.0622441	50.5916	0		0.535548	1.25847	1.11988	0.748303	0.223289	0.359844	0.474556	0.575417	0.221965	0.349799	0.449458	0.663525	0.849734	0.781076	-0.217165	1.01542	0.847099	0.265442	-1.47926	-0.790806	-0.391601	-0.113571	-1.48785	-0.831654	-0.469995	0.0919713	0.448832	0.327283	0	0	0	0	0	0
Synpcc7942_0690	637799102	clpS	ATP-dependent Clp protease adaptor protein ClpS	chromosome	-	684868	685155	0	0.186924	242.674	0		1.74471	3.47597	2.88677	2.20875	0.736214	1.10786	1.39622	1.46598	0.879443	1.31364	1.6036	1.64696	2.21462	2.16071	-0.0615798	0.932847	0.664888	0.278662	-1.30637	-0.71679	-0.38304	-0.312704	-1.04991	-0.471005	-0.183253	-0.144761	0.282489	0.246937	0	0	0	0	1	126
Synpcc7942_0691	637799103		hypothetical protein	chromosome	+	685290	685634	0	0.0744501	280.486	0		0.211622	0.147999	0.147283	0.15874	0.149601	0.16482	0.166725	0.165671	0.217774	0.199825	0.233807	0.192544	0.15195	0.167499	0.318565	-0.197334	-0.204333	-0.096256	-0.1818	-0.0420295	-0.0254561	-0.0346054	0.359906	0.235813	0.462395	0.182262	-0.159326	-0.0187741	0	0	0	0	0	0
Synpcc7942_0692	637799104		hypothetical protein	chromosome	-	685631	686185	0	0.120983	221.446	0		0.108334	0.115232	0.138639	0.12687	0.0854553	0.13471	0.0637051	0.0718948	0.147933	0.190868	0.168138	0.0979276	0.0822112	0.0894922	0.227869	0.316917	0.583715	0.455725	-0.114379	0.542241	-0.53814	-0.363661	0.677324	1.04495	0.862024	0.0821665	-0.170213	-0.0477863	0	0	0	0	0	0
Synpcc7942_0693	637799105		hypothetical protein	chromosome	-	686247	687080	0	0.102945	49.3925	0		0.0926909	0.283232	0.423003	0.349978	0.0928282	0.0795446	0.105035	0.107325	0.0492224	0.0483871	0.0493076	0.0691172	0.0931215	0.100211	0.124593	1.73608	2.31476	2.04136	0.126728	-0.0960715	0.304964	0.336079	-0.788521	-0.813211	-0.786026	-0.29879	0.13128	0.237139	0	0	0	0	0	0
Synpcc7942_0694	637799106	rps1	30S ribosomal protein S1	chromosome	-	687133	688056	0	0.128577	30.8372	0		7.76358	18.3082	24.0828	20.635	8.84287	7.00759	8.12005	8.90223	4.7496	4.71134	4.82193	5.45007	9.08279	9.28746	-0.0291327	1.20856	1.60408	1.38117	0.15866	-0.176936	0.0356349	0.168313	-0.738048	-0.749715	-0.716243	-0.539579	0.197281	0.22943	0	0	0	0	1	127
Synpcc7942_0695	637799107		hypothetical protein	chromosome	-	688334	688840	0	0.152283	62.457	0		2.28005	1.52488	1.38688	1.536	2.03875	2.07904	1.63724	1.90585	3.58251	3.7841	3.01977	1.84728	1.65437	1.75677	0.320356	-0.260008	-0.396862	-0.249531	0.158974	0.187207	-0.157439	0.0617271	0.972263	1.05124	0.72573	0.0166985	-0.142428	-0.0557794	0	0	0	0	1	128
Synpcc7942_0696	637799108	psbT, psbTc	photosystem II reaction center protein T	chromosome	-	689050	689145	0	0.193157	177.473	0		24.1501	14.9569	17.3811	28.2917	32.4322	28.7386	22.8233	30.2408	30.4174	25.9925	19.7045	11.2657	13.1916	17.8644	-0.190869	-0.882089	-0.665377	0.0374786	0.234526	0.0600923	-0.272392	0.133595	0.142	-0.0848056	-0.484371	-1.29096	-1.06327	-0.625809	0	0	0	0	0	0
Synpcc7942_0697	637799109	psbB	photosystem II core light harvesting protein	chromosome	-	689222	690748	1	0.216437	132.077	1	Dawn	27.637	17.4918	21.4482	33.1705	39.1371	34.3965	26.6908	35.1151	40.6137	31.2649	23.3242	13.193	15.5187	20.3639	-0.163692	-0.823617	-0.529436	0.0996087	0.338245	0.151972	-0.213948	0.1818	0.391675	0.0142523	-0.408464	-1.23052	-0.996285	-0.60428	0	0	1	55	1	129
Synpcc7942_0698	637799110		probable ferredoxin	chromosome	+	691085	691519	0	0.0611677	56.7027	0		0.457441	1.59943	1.29604	1.0888	0.328691	0.394579	0.4161	0.578877	0.528834	0.430993	0.445403	0.724412	0.574664	0.766322	-0.164622	1.64128	1.33783	1.08647	-0.641477	-0.377892	-0.301279	0.175049	0.0446083	-0.250543	-0.203096	0.498602	0.164512	0.579742	0	0	1	55	1	129
Synpcc7942_0699	637799111	psbM	photosystem II reaction center protein PsbM	chromosome	+	691619	691726	1	0.275111	204.41	1	Dusk	7.86695	4.10694	5.09918	6.36923	9.66765	7.92689	5.70705	5.31223	9.54568	6.56234	6.5096	5.04764	4.73261	6.07144	0.189515	-0.748227	-0.436024	-0.11517	0.486876	0.200465	-0.273545	-0.376973	0.468558	-0.0720797	-0.0837207	-0.450681	-0.543653	-0.184251	0	0	0	0	0	0
Synpcc7942_0700	637799112		hypothetical protein	chromosome	-	691824	692744	1	0.14944	187.111	0		3.24627	1.08807	1.09396	1.46501	5.1511	5.33141	3.3748	2.90916	8.64458	7.37393	6.68975	1.51523	1.59585	2.29559	0.274914	-1.3021	-1.2943	-0.872957	0.941013	0.990649	0.330935	0.116737	1.68793	1.45857	1.31809	-0.82433	-0.749541	-0.225001	0	0	1	56	1	131
Synpcc7942_0701	637799113		hypothetical protein	chromosome	+	692799	693260	0	0.106921	156.231	0		0.348594	0.400771	0.455648	0.427264	0.326088	0.348727	0.414626	0.301118	0.24142	0.247487	0.385138	0.363615	0.368775	0.38351	0.0589415	0.26017	0.445313	0.352522	-0.0373457	0.0594912	0.309206	-0.152278	-0.471062	-0.435256	0.202771	0.119807	0.140134	0.196658	0	0	0	0	0	0
Synpcc7942_0702	637799114		hypothetical protein	chromosome	+	693257	694045	0	0.0868687	63.9485	0		0.124286	0.194797	0.196884	0.193741	0.0919347	0.118782	0.157175	0.111396	0.0559565	0.0522124	0.0841935	0.121765	0.148264	0.166456	0.310541	0.958846	0.974219	0.951003	-0.124445	0.245185	0.649245	0.152571	-0.840749	-0.940661	-0.251345	0.280978	0.565044	0.732019	0	0	0	0	0	0
Synpcc7942_0703	637799115	smf	DNA processing protein DprA, putative	chromosome	+	694072	695280	1	0.808289	346.414	1	Dusk	0.407918	0.0853192	0.0456311	0.0517692	0.45517	0.891887	1.13834	0.121757	0.447179	1.07299	1.71442	0.469977	0.277025	0.427411	-0.00620584	-2.26354	-3.16639	-2.98432	0.151922	1.12238	1.47438	-1.75047	0.12637	1.38908	2.06516	0.198108	-0.564467	0.0611414	0	0	0	0	0	0
Synpcc7942_0704	637799116	act	Chloramphenicol O-acetyltransferase	chromosome	+	695313	695948	1	0.619558	348.932	1	Dusk	0.38265	0.177595	0.130113	0.134368	0.405758	0.849369	1.0355	0.180585	0.322731	0.7667	1.2198	0.523955	0.319018	0.508366	0.0389879	-1.06845	-1.51727	-1.47085	0.123585	1.18936	1.47522	-1.04436	-0.206702	1.04163	1.71154	0.492408	-0.223397	0.448832	0	0	0	0	0	0
Synpcc7942_0705	637799117		hypothetical protein	chromosome	+	695935	696570	1	0.457468	7.26365	1	Dusk	0.490692	0.287882	0.279249	0.253596	0.416725	0.842746	1.1807	0.259432	0.444517	0.782563	1.26705	0.689688	0.483106	0.662303	-0.117532	-0.886872	-0.930799	-1.06982	-0.353255	0.662748	1.14922	-1.03699	-0.260111	0.555858	1.25105	0.373594	-0.140009	0.315141	0	0	0	0	0	0
Synpcc7942_0706	637799118	cobL	precorrin-6B methylase	chromosome	-	696577	697191	0	0.334431	308.15	0		0.358472	0.317001	0.252588	0.244641	0.204136	0.256834	0.269431	0.336678	0.253147	0.39644	0.288038	0.467756	0.269138	0.264027	-0.0353367	-0.212711	-0.540413	-0.58653	-0.847664	-0.516361	-0.447283	-0.125827	-0.537219	0.109907	-0.350939	0.348558	-0.448849	-0.47651	0	0	0	0	0	0
Synpcc7942_0707	637799119	cad, ldcC	arginine decarboxylase	chromosome	-	697172	698641	0	0.0427076	236.012	0		0.0589179	0.0592943	0.0513558	0.0478997	0.0474467	0.0408313	0.0560015	0.0359474	0.0300338	0.0531888	0.0672464	0.0657292	0.0353315	0.0461335	-0.0234872	-0.0143015	-0.221667	-0.322176	-0.335888	-0.552517	-0.0967286	-0.736306	-0.995608	-0.171071	0.167263	0.13434	-0.761237	-0.376381	0	0	0	0	0	0
Synpcc7942_0708	637799121		hypothetical protein	chromosome	+	698708	700459	0	0.243934	85.291	0		1.24077	1.43952	1.35456	1.29226	0.288222	0.450778	0.946679	1.31294	0.321847	0.340226	0.354785	1.99039	1.41989	1.29644	-0.349881	-0.135523	-0.223287	-0.291218	-2.45586	-1.81062	-0.740166	-0.268309	-2.29666	-2.21655	-2.1561	0.331942	-0.155329	-0.286556	0	0	0	0	0	0
Synpcc7942_0709	637799122		hypothetical protein	chromosome	+	700511	700840	0	0.166175	171.207	0		0.479356	0.595462	0.577783	0.47963	0.105677	0.137212	0.295835	0.457512	0.185424	0.0840727	0.107839	0.815164	0.570708	0.400877	-0.252407	0.0605072	0.0170234	-0.251581	-2.43385	-2.0571	-0.948708	-0.319692	-1.62268	-2.76379	-2.40463	0.513587	-0.000750203	-0.510345	0	0	0	0	0	0
Synpcc7942_0710	637799123		hypothetical protein	chromosome	-	700843	701538	0	0.10649	202.592	0		1.23822	1.27679	1.47543	1.47169	1.38792	1.32838	1.37461	1.56805	1.66151	1.3239	1.61799	1.3772	1.72748	1.77651	-0.129125	-0.0848677	0.123746	0.120081	0.0355326	-0.027724	0.0216386	0.211584	0.295107	-0.0325912	0.256818	0.0243522	0.35128	0.391658	0	0	0	0	0	0
Synpcc7942_0711	637799124	carB, pyrA	carbamoyl phosphate synthase large subunit	chromosome	+	701604	704897	1	0.217786	154.932	0		0.351588	0.567581	0.81272	0.832386	0.401879	0.345572	0.3643	0.506472	0.29087	0.229707	0.191342	0.230828	0.408475	0.402622	-0.28904	0.401899	0.919831	0.954325	-0.0961652	-0.313942	-0.2378	0.237556	-0.562554	-0.903134	-1.16677	-0.896107	-0.072678	-0.0935019	0	0	0	0	0	0
Synpcc7942_0712	637799125		C-terminal processing peptidase-2. Serine peptidase. MEROPS family S41A	chromosome	-	705073	706350	0	0.126468	215.688	0		1.63151	1.16226	0.961043	0.982309	1.49862	1.60754	1.4898	2.05432	2.6764	2.97938	3.1973	2.9245	2.19947	1.70777	-0.00514459	-0.494412	-0.768677	-0.737102	-0.127712	-0.0264934	-0.136231	0.327309	0.708943	0.863663	0.965506	0.836839	0.425809	0.0607665	0	0	0	0	0	0
Synpcc7942_0713	637799126	ispG	4-hydroxy-3-methylbut-2-en-1-yl diphosphate synthase	chromosome	-	706450	707673	0	0.182728	151.264	0		0.492391	0.447493	0.523466	0.618534	0.669544	0.649534	0.618244	0.721151	0.704314	0.627111	0.722978	0.497857	0.573037	0.624286	-0.177795	-0.315734	-0.089503	0.151254	0.26558	0.221804	0.150577	0.372701	0.338619	0.17112	0.376352	-0.161869	0.0410287	0.164607	0	0	0	0	0	0
Synpcc7942_0714	637799127	amiA	Cell wall hydrolase/autolysin	chromosome	-	707744	709450	0	0.0938566	148.606	0		0.168986	0.143517	0.136079	0.107883	0.109911	0.108571	0.166937	0.114034	0.173787	0.180261	0.206623	0.184926	0.140756	0.135132	0.0597566	-0.175926	-0.252708	-0.587682	-0.560811	-0.578505	0.0421558	-0.50769	0.100174	0.152941	0.34985	0.189797	-0.203948	-0.262777	0	0	0	0	0	0
Synpcc7942_0715	637799128	murZ, murA	UDP-N-acetylglucosamine 1-carboxyvinyltransferase	chromosome	+	709992	711179	0	0.619425	240.311	0		1.93947	0.899532	0.748706	0.987831	1.36499	1.54319	1.1136	2.62207	1.96182	2.56181	1.77202	3.55317	1.43862	1.11435	0.115754	-0.992665	-1.25744	-0.857575	-0.391021	-0.213999	-0.684677	0.550796	0.132279	0.517252	-0.0145184	0.989196	-0.315227	-0.683708	0	0	0	0	1	133
Synpcc7942_0716	637799129		hypothetical protein	chromosome	+	711446	712546	0	0.139634	245.934	0		0.194385	0.192998	0.225043	0.236682	0.138733	0.133899	0.154813	0.189042	0.231452	0.198537	0.203271	0.214908	0.158272	0.158325	-0.546162	-0.556493	-0.334882	-0.262131	-1.03277	-1.08394	-0.874553	-0.586372	-0.294367	-0.515674	-0.481676	-0.401361	-0.842677	-0.842188	0	0	0	0	0	0
Synpcc7942_0717	637799130	dcd	dCTP deaminase	chromosome	-	713127	713651	0	0.0428825	189.025	0		0.0136339	0.0098239	0.00460885	0.00687791	0.0119566	0.00200575	0.00804124	0.00718948	0	0.00800692	0.0165695	0.0104569	0.0110948	0.00818706	0.555132	0.0823018	-1.00959	-0.432024	0.365736	-2.20985	-0.206576	-0.368107	NaN	-0.212747	0.836465	0.172391	0.257813	-0.180648	0	0	0	0	0	0
Synpcc7942_0718	637799131		hypothetical protein	chromosome	-	713678	714331	0	0.118425	81.2055	0		0.0153225	0.00867478	0.0110993	0.00736168	0.0170634	0.0161012	0.0161378	0.0148407	0.010659	0.0167117	0.0193472	0.0184675	0.0126173	0.0131444	-0.156746	-0.9775	-0.62193	-1.21429	-0.00149481	-0.0852302	-0.0819537	-0.202842	-0.680324	-0.0315407	0.179728	0.112589	-0.436992	-0.377954	0	0	0	0	0	0
Synpcc7942_0719	637799132		hypothetical protein	chromosome	-	714328	714831	0	0.0616392	241.114	0		0.00710099	0.00716326	0.000960178	0.00238816	0.00415158	0.0125359	0.00628222	0.00320959	0.0092209	0.015013	0.0125527	0.0130711	0.00288926	0.0123185	-0.436225	-0.423629	-3.32287	-2.00834	-1.21058	0.383752	-0.612971	-1.58186	-0.0593383	0.643892	0.385676	0.444068	-1.73354	0.358509	0	0	0	0	0	0
Synpcc7942_0720	637799133		hypothetical protein	chromosome	-	715051	715389	0	0.129978	132.761	0		0.00844578	0.0091284	0.00428256	0	0.00822968	0.0062125	0.00778328	0.00636237	0.0091393	0.00744006	0.00933118	0.0097166	0.00715923	0.00845272	1.17161	1.28374	0.191856	NaN	1.13422	0.728555	1.05376	0.762947	1.28547	0.988696	1.31544	1.37383	0.933187	1.1728	0	0	0	0	0	0
Synpcc7942_0721	637799134		hypothetical protein	chromosome	-	715592	715882	0	0.0499961	278.159	0		0.00491945	0	0.00498896	0	0.00479358	0.0108559	0	0.00185296	0.00532341	0.0028891	0.00271759	0.00565967	0.00166803	0.00328233	0.676761	NaN	0.697005	NaN	0.639368	1.81867	NaN	-0.731904	0.790614	-0.0911177	-0.179409	0.878982	-0.883592	0.092984	0	0	0	0	0	0
Synpcc7942_0722	637799135		hypothetical protein	chromosome	-	715943	717025	0	0.0772752	224.972	0		0.0158622	0.0123819	0.0156395	0.0133367	0.0212524	0.018474	0.025825	0.021907	0.0486332	0.0225125	0.0197157	0.0162213	0.022858	0.0119064	0.0199532	-0.3374	-0.000445233	-0.230237	0.441991	0.239861	0.723131	0.485756	1.63631	0.525093	0.333707	0.0522492	0.547062	-0.393899	0	0	0	0	0	0
Synpcc7942_0723	637799136		hypothetical protein	chromosome	-	717322	717963	1	0.239233	216.189	1	Dusk	0.625471	0.803356	0.515588	0.545573	0.581221	0.580636	0.499759	0.506455	1.03274	0.873465	0.7785	0.470317	0.752288	0.432201	0.131656	0.492753	-0.147067	-0.0655157	0.0258011	0.0243482	-0.192053	-0.172852	0.855119	0.613463	0.447409	-0.279654	0.397999	-0.401583	0	0	0	0	0	0
Synpcc7942_0724	637799137		hypothetical protein	chromosome	+	718004	718447	0	0.102819	53.1348	0		0.0193454	0.020909	0.016349	0.0149099	0.0172796	0.01423	0.022582	0.0170022	0.0279119	0.0227223	0.0267168	0.0222563	0.0174917	0.0311932	-0.571062	-0.45893	-0.813853	-0.946783	-0.733986	-1.01412	-0.347877	-0.757335	-0.0421715	-0.338941	-0.105304	-0.368841	-0.716378	0.118179	0	0	0	0	0	0
Synpcc7942_0725	637799138		DEAD/DEAH box helicase-like	chromosome	+	718666	720075	0	0.0757433	91.7753	0		0.0340122	0.0215812	0.0151013	0.0132314	0.0212702	0.0246451	0.0321863	0.0198858	0.0307625	0.0393532	0.0499169	0.0280334	0.0302942	0.0233709	0.047497	-0.60878	-1.12388	-1.31459	-0.629721	-0.417255	-0.0321079	-0.726818	-0.0973846	0.257923	0.60097	-0.231409	-0.119514	-0.493845	0	0	0	0	0	0
Synpcc7942_0726	637799139		hypothetical protein	chromosome	+	720068	720430	0	0.09509	27.5307	0		0.00985923	0.00426244	0	0.0016579	0.00192139	0.00580176	0.00581495	0.00742715	0.00426752	0.00694815	0.00435712	0.00302473	0.0066859	0.00131564	1.24379	0.0339982	NaN	-1.32832	-1.11553	0.478809	0.482086	0.835128	0.0357189	0.73895	0.0656954	-0.460875	0.683441	-1.66191	0	0	0	0	0	0
Synpcc7942_0727	637799140		hypothetical protein	chromosome	+	720423	722966	0	0.0640687	318.291	0		0.0185698	0.0198679	0.0184517	0.0165594	0.0128856	0.0202822	0.0161797	0.0216193	0.024966	0.032056	0.0186514	0.028701	0.0194616	0.0150182	-0.271842	-0.174357	-0.281043	-0.437144	-0.799041	-0.144584	-0.470615	-0.052477	0.155168	0.515797	-0.265517	0.356304	-0.204165	-0.578086	0	0	0	0	0	0
Synpcc7942_0728	637799141		hypothetical protein	chromosome	+	723236	723781	0	0.119019	354.562	0		0.718402	1.14864	0.710827	0.465141	0.593996	0.729013	0.722938	0.642905	0.885206	1.07939	1.09353	1.05776	0.99035	0.975275	-0.0590094	0.618056	-0.074302	-0.686133	-0.333348	-0.037856	-0.0499275	-0.219194	0.242213	0.52835	0.547121	0.499136	0.404138	0.382009	0	0	0	0	1	135
Synpcc7942_0729	637799142		hypothetical protein	chromosome	+	723806	724411	0	0.085089	17.8812	0		0.190166	0.210217	0.167698	0.12811	0.151923	0.17029	0.193318	0.157492	0.152099	0.202551	0.288401	0.276306	0.229882	0.207266	-0.0122393	0.132381	-0.19363	-0.58212	-0.336156	-0.171503	0.0114792	-0.284216	-0.334486	0.0787893	0.588576	0.526768	0.261397	0.111985	0	0	0	0	0	0
Synpcc7942_0730	637799143		hypothetical protein	chromosome	+	724626	725165	0	0.0561394	175.178	0		0.03844	0.0821387	0.0654201	0.0612962	0.0439145	0.0448508	0.0693836	0.0539211	0.0803243	0.0825158	0.125945	0.111831	0.108765	0.102591	-0.784647	0.310806	-0.0175224	-0.111459	-0.592559	-0.562123	0.0673386	-0.296406	0.27858	0.317413	0.927466	0.75599	0.715882	0.631576	0	0	0	0	0	0
Synpcc7942_0731	637799144		putative phage terminase large subunit	chromosome	+	725474	727354	0	0.0720282	260.334	0		0.0182655	0.0208386	0.0133782	0.0102383	0.00704511	0.00559818	0.0162716	0.021213	0.0140005	0.0268174	0.0189191	0.0245162	0.0242569	0.0137104	0.403702	0.593837	-0.0455396	-0.431451	-0.970726	-1.30239	0.23694	0.619527	0.0200551	0.957751	0.454422	0.828316	0.812975	-0.0101502	0	0	0	0	0	0
Synpcc7942_0732	637799146		hypothetical protein	chromosome	+	727482	727691	0	0.081796	23.3225	0		0.187466	0.144903	0.103699	0.0773765	0.132851	0.140402	0.198518	0.179737	0.490552	0.420363	0.512149	0.167311	0.171044	0.179661	-0.141053	-0.5126	-0.995279	-1.41772	-0.637878	-0.558115	-0.0584127	-0.201796	1.24672	1.02395	1.30888	-0.305154	-0.273313	-0.20241	0	0	0	0	0	0
Synpcc7942_0733	637799147		Phage portal protein, lambda	chromosome	+	727691	729154	0	0.0364607	319.47	0		0.20828	0.174384	0.109082	0.104825	0.138636	0.161118	0.164728	0.199994	0.371406	0.380739	0.373262	0.22762	0.254634	0.196708	0.257669	0.0014135	-0.675437	-0.732878	-0.329559	-0.112743	-0.0807708	0.199102	1.09214	1.12795	1.09933	0.385771	0.547568	0.175196	0	0	0	0	0	0
Synpcc7942_0734	637799148		hypothetical protein	chromosome	+	729177	731051	0	0.169367	125.166	0		0.536739	0.519056	0.401339	0.299143	0.354871	0.480176	0.450309	1.04593	1.33637	1.50838	1.56097	0.943088	0.904519	0.722099	0.159501	0.111169	-0.2599	-0.683884	-0.437428	-0.00115582	-0.0938037	1.12199	1.47552	1.6502	1.69965	0.972672	0.912431	0.587476	0	0	0	0	0	0
Synpcc7942_0735	637799149		hypothetical protein	chromosome	+	731099	731428	0	0.200024	265.71	0		0.646371	0.620469	0.395942	0.36109	0.450182	0.46269	0.495724	1.09313	1.3097	1.47509	1.5361	1.0514	0.945787	0.777151	0.321609	0.262605	-0.385463	-0.518394	-0.200244	-0.160708	-0.0612159	1.07964	1.34041	1.51198	1.57045	1.02348	0.870761	0.587441	0	0	0	0	0	0
Synpcc7942_0736	637799150		electron transfer protein	chromosome	+	731434	731745	0	0.247517	296.11	0		0.562071	0.679408	0.457562	0.366491	0.319672	0.452258	0.456669	1.00065	1.38278	1.40391	1.58417	1.02935	0.924119	0.811272	0.119684	0.39321	-0.177102	-0.497289	-0.694476	-0.193922	-0.179919	0.951799	1.41843	1.44031	1.61459	0.992597	0.837011	0.649117	0	0	0	0	0	0
Synpcc7942_0737	637799151		hypothetical protein	chromosome	+	731738	732376	0	0.161312	254.253	0		0.43126	0.456834	0.338523	0.231685	0.243404	0.342767	0.371624	0.738356	0.877587	0.899933	0.985119	0.774941	0.607695	0.571749	0.298161	0.381275	-0.0511411	-0.598229	-0.527047	-0.0331704	0.0834475	1.07392	1.32315	1.35942	1.4899	1.14369	0.792949	0.704985	0	0	0	0	0	0
Synpcc7942_0738	637799152		Phage baseplate assembly protein V	chromosome	+	732710	733270	0	0.102003	278.773	0		0.207972	0.261095	0.153546	0.104058	0.0770818	0.12013	0.126988	0.263358	0.242998	0.263757	0.393294	0.335656	0.327058	0.222189	0.264759	0.592948	-0.172954	-0.734247	-1.16717	-0.527026	-0.446934	0.605397	0.489315	0.607584	1.18398	0.955354	0.91792	0.36016	0	0	0	0	0	0
Synpcc7942_0739	637799153		hypothetical protein	chromosome	+	733536	733880	0	0.0693172	193.731	0		0.122409	0.173413	0.127645	0.0872199	0.0586276	0.0702012	0.123896	0.121909	0.150421	0.153524	0.220054	0.253012	0.18431	0.182726	-0.00871369	0.493794	0.051719	-0.497691	-1.07077	-0.810852	0.00871283	-0.0146203	0.288585	0.318044	0.837435	1.03878	0.581713	0.56926	0	0	0	0	0	0
Synpcc7942_0740	637799154		GPJ of phage P2-like	chromosome	+	733877	734716	0	0.102566	333.109	0		0.122705	0.116045	0.0800788	0.0537337	0.0398552	0.0476366	0.0866946	0.141222	0.0977415	0.0940813	0.170402	0.188878	0.177401	0.108024	0.297762	0.217249	-0.317941	-0.893535	-1.32459	-1.06729	-0.203419	0.500531	-0.0303902	-0.0854536	0.771512	0.920021	0.829578	0.113915	0	0	0	0	0	0
Synpcc7942_0741	637799155		Phage tail protein I	chromosome	+	734713	735552	0	0.0274171	81.8509	0		0.115036	0.102537	0.0795027	0.0422705	0.0531402	0.0601725	0.0797842	0.109768	0.0949753	0.114099	0.148749	0.187571	0.159487	0.102907	0.325646	0.159705	-0.207364	-1.11872	-0.788563	-0.609264	-0.202265	0.258018	0.0491841	0.313842	0.696441	1.031	0.797002	0.164899	0	0	0	0	0	0
Synpcc7942_0742	637799157		hypothetical protein	chromosome	+	735651	736136	1	0.217931	311.113	0		0.253321	0.203755	0.171267	0.141167	0.140641	0.253504	0.277969	0.436029	0.560995	0.432473	0.64437	0.526396	0.469416	0.397	-0.192194	-0.506327	-0.756913	-1.03576	-1.04114	-0.191151	-0.0582397	0.59126	0.954825	0.579446	1.15473	0.862985	0.697704	0.455975	0	0	0	0	0	0
Synpcc7942_0743	637799158		hypothetical protein	chromosome	+	736140	738155	0	0.102674	219.683	0		0.228652	0.176267	0.125543	0.10299	0.137694	0.174458	0.190561	0.272013	0.38113	0.387001	0.491123	0.380697	0.368622	0.331415	0.170055	-0.205332	-0.694914	-0.9806	-0.561631	-0.220215	-0.0928477	0.420576	0.907187	0.92924	1.27299	0.905545	0.859043	0.705541	0	0	0	0	0	0
Synpcc7942_0744	637799159		hypothetical protein	chromosome	+	738159	739610	0	0.118834	254.419	0		0.184368	0.141016	0.113983	0.112323	0.107598	0.134891	0.147918	0.196448	0.262453	0.303403	0.365998	0.276763	0.25841	0.227935	0.070437	-0.316293	-0.623324	-0.644499	-0.706496	-0.380356	-0.247353	0.162001	0.57991	0.789086	1.05969	0.656501	0.557514	0.376477	0	0	0	0	0	0
Synpcc7942_0745	637799160		hypothetical protein	chromosome	+	739615	740778	0	0.149552	265.28	0		0.22691	0.208252	0.138444	0.0997858	0.118641	0.123938	0.189956	0.252466	0.290126	0.262185	0.385897	0.375896	0.347784	0.277767	0.122544	-0.00124617	-0.590273	-1.06267	-0.812969	-0.749957	-0.133907	0.276514	0.477104	0.331014	0.888644	0.850762	0.738617	0.414302	0	0	0	0	0	0
Synpcc7942_0746	637799161		hypothetical protein	chromosome	+	740782	741288	1	0.104969	339.787	0		0.207534	0.173953	0.125993	0.0878392	0.0632809	0.151618	0.140514	0.201008	0.227631	0.243761	0.324438	0.362744	0.34083	0.30143	0.292551	0.0379003	-0.427446	-0.947859	-1.42095	-0.160354	-0.270087	0.246455	0.4259	0.524672	0.937147	1.09815	1.00826	0.831029	0	0	0	0	0	0
Synpcc7942_0747	637799162		hypothetical protein	chromosome	+	741396	742820	0	0.106281	157.099	0		0.750941	0.692016	0.465591	0.394877	0.502175	0.506188	0.605474	1.68158	2.00189	1.88677	1.83081	1.41504	1.37444	1.33286	0.169916	0.052023	-0.519719	-0.757381	-0.410592	-0.39911	-0.140719	1.33296	1.58451	1.49906	1.45563	1.08399	1.04199	0.997674	0	0	0	0	0	0
Synpcc7942_0748	637799163		Phage major tail tube protein	chromosome	+	742817	743320	0	0.115473	174.64	0		0.739923	0.766469	0.468567	0.374942	0.459442	0.505616	0.584246	1.58447	1.72892	1.7782	1.72128	1.26572	1.33291	1.2906	0.19779	0.248642	-0.461331	-0.78292	-0.489704	-0.351544	-0.143009	1.29634	1.42221	1.46276	1.41583	0.972303	1.04692	1.00038	0	0	0	0	0	0
Synpcc7942_0749	637799164		hypothetical protein	chromosome	+	743324	743614	0	0.0953586	357.139	0		0.831387	0.751478	0.444018	0.459118	0.570436	0.600691	0.634698	1.58799	2.12936	1.59767	1.73382	1.36398	1.45619	1.31457	0.199879	0.0540897	-0.705023	-0.656775	-0.343576	-0.269018	-0.18957	1.13349	1.55671	1.14226	1.26024	0.91411	1.00848	0.860881	0	0	0	0	0	0
Synpcc7942_0750	637799165		Phage tail tape measure protein TP901, core region	chromosome	+	743738	746590	0	0.0763678	292.875	0		0.204222	0.218559	0.138241	0.103151	0.132257	0.141362	0.176642	0.357017	0.511755	0.374246	0.478149	0.368301	0.379061	0.313364	0.110068	0.207951	-0.45288	-0.875317	-0.516726	-0.420673	-0.0992406	0.915924	1.43538	0.983917	1.33739	0.960817	1.00236	0.72777	0	0	0	0	0	0
Synpcc7942_0751	637799166		hypothetical protein	chromosome	+	746590	747510	0	0.11461	238.057	0		0.0808264	0.118719	0.0767141	0.064037	0.0711854	0.0731739	0.079643	0.15866	0.210249	0.171614	0.209511	0.1824	0.208177	0.184602	-0.309936	0.244714	-0.38527	-0.645856	-0.49318	-0.453432	-0.331215	0.663108	1.06926	0.776334	1.06419	0.864271	1.05498	0.881581	0	0	0	0	0	0
Synpcc7942_0752	637799167		hypothetical protein	chromosome	+	747510	747722	0	0.107525	235.884	0		0.1445	0.121069	0.12723	0.0678104	0.0884112	0.0642687	0.0693699	0.207584	0.178184	0.181565	0.196776	0.260318	0.31904	0.244395	0.453145	0.197906	0.269516	-0.638348	-0.255626	-0.715737	-0.605545	0.975766	0.755443	0.782563	0.89863	1.30235	1.59581	1.21129	0	0	0	0	0	0
Synpcc7942_0753	637799168		phage late control gene D protein GPD	chromosome	+	747719	749161	0	0.0844115	139.106	0		0.083334	0.108655	0.0596947	0.0467107	0.0415676	0.0532712	0.0753344	0.120697	0.10628	0.105455	0.159479	0.175007	0.172899	0.144631	0.326646	0.709425	-0.154657	-0.508507	-0.6768	-0.318904	0.181048	0.861053	0.677538	0.666295	1.26303	1.39708	1.3796	1.12204	0	0	0	0	0	0
Synpcc7942_0754	637799169		hypothetical protein	chromosome	-	749183	749431	0	0.055651	356.611	0		0.0488685	0.0186417	0.0194349	0.036254	0.0252096	0.012687	0.0254316	0.0108275	0.0497706	0.0472698	0.0476396	0.0463002	0.0428864	0.0153439	0.35162	-1.03875	-0.978634	-0.0791431	-0.603312	-1.59394	-0.590661	-1.82258	0.37801	0.303633	0.314877	0.273733	0.163235	-1.31962	0	0	0	0	0	0
Synpcc7942_0755	637799170		hypothetical protein	chromosome	+	749431	750009	0	0.191394	187.379	0		0.0358508	0.112237	0.0576704	0.0249458	0.0144552	0.0200055	0.0218738	0.053083	0.0200662	0.0392049	0.0437067	0.0625789	0.0586835	0.0602129	-0.327638	1.31883	0.358187	-0.850847	-1.63805	-1.16924	-1.04044	0.238605	-1.16488	-0.19861	-0.0417896	0.476034	0.383311	0.420428	0	0	0	0	0	0
Synpcc7942_0756	637799171		chain A, D20c mutant of T4 lysozyme	chromosome	+	750406	750870	1	0.466459	327.032	0		0.150853	0.110915	0.107193	0.112598	0.0884957	0.149461	0.161149	0.222642	0.399771	0.383299	0.457484	0.262097	0.22965	0.228005	-0.0777826	-0.521467	-0.570711	-0.49974	-0.847243	-0.0911553	0.0174742	0.483804	1.32825	1.26755	1.5228	0.719182	0.528514	0.518146	0	0	0	0	0	0
Synpcc7942_0757	637799172		hypothetical protein	chromosome	+	751277	751957	0	0.210719	191.708	0		0.230185	0.256741	0.245873	0.203257	0.155675	0.122156	0.131733	0.125895	0.136486	0.146911	0.164899	0.165261	0.234501	0.257374	0.869516	1.02704	0.964638	0.690028	0.305263	-0.0445472	0.0643395	-0.00105391	0.115472	0.221668	0.388305	0.391468	0.896319	1.03059	0	0	0	0	0	0
Synpcc7942_0758	637799173		hypothetical protein	chromosome	+	751959	752381	0	0.216806	228.336	0		0.262283	0.418213	0.378678	0.362798	0.300092	0.234004	0.286933	0.268968	0.36622	0.27428	0.385126	0.306291	0.518674	0.391773	-0.0781855	0.594924	0.451659	0.389853	0.116091	-0.242778	0.0513997	-0.0418765	0.403399	-0.0136645	0.47602	0.145592	0.905515	0.500705	0	0	0	0	0	0
Synpcc7942_0759	637799174		hypothetical protein	chromosome	+	752574	753953	0	0.28167	222.133	0		1.06537	0.678703	0.523205	0.539891	1.45406	1.15145	0.905514	0.74122	1.60917	2.70738	1.95584	0.650431	0.938081	0.965886	1.02939	0.378884	0.00347917	0.0487713	1.47812	1.14149	0.794839	0.506004	1.62435	2.37493	1.90582	0.3175	0.845815	0.887955	0	0	1	58	1	136
Synpcc7942_0760	637799175		hypothetical protein	chromosome	+	753963	754553	0	0.271965	214.29	0		0.750903	0.523609	0.418423	0.409358	0.927594	0.794664	0.712538	0.519139	0.644808	1.77676	1.07851	0.47003	0.712078	0.813742	1.35077	0.830632	0.507105	0.475505	1.65564	1.43249	1.27511	0.818263	1.13101	2.59332	1.87311	0.674896	1.27418	1.46671	0	0	0	0	0	0
Synpcc7942_0761	637799176		hypothetical protein	chromosome	-	754779	755507	0	0.195675	245.743	0		0.450676	0.733659	0.61404	0.421024	0.266931	0.280227	0.343118	0.363912	0.303872	0.508588	0.4567	0.546729	0.649858	0.522782	0.870404	1.57342	1.31664	0.772217	0.114782	0.18491	0.477017	0.561902	0.301778	1.04481	0.889559	1.14914	1.39844	1.08452	0	0	0	0	0	0
Synpcc7942_0762	637799177		hypothetical protein	chromosome	-	756010	756561	0	0.235458	213.236	0		1.34727	1.24828	1.04939	1.02701	1.04494	0.84127	0.837447	0.997345	1.51964	1.69059	1.56444	1.01145	1.05785	0.999282	0.582483	0.472377	0.221991	0.190896	0.215853	-0.0969192	-0.10349	0.148604	0.756173	0.909968	0.798089	0.168865	0.23357	0.151403	0	0	0	0	0	0
Synpcc7942_0763	637799178		transcriptional regulator, XRE family	chromosome	-	756989	757318	0	0.10221	282.624	0		0.190875	0.218805	0.217035	0.198782	0.109904	0.13083	0.172704	0.137254	0.215937	0.216551	0.189317	0.151388	0.244169	0.185243	0.500443	0.697464	0.685746	0.559005	-0.295943	-0.0444938	0.356118	0.0246628	0.678426	0.682523	0.488621	0.166064	0.855697	0.457234	0	0	0	0	0	0
Synpcc7942_0764	637799179		transcriptional regulator, XRE family	chromosome	-	757356	757595	0	0.155545	265.395	0		0.325083	0.459881	0.471831	0.44384	0.482414	0.526509	0.424364	0.397668	0.764874	0.732133	0.586523	0.35913	0.493486	0.394002	-0.143727	0.356725	0.393735	0.305504	0.425735	0.551923	0.240766	0.147029	1.09068	1.02757	0.707652	-3.17526e-05	0.458473	0.133668	0	0	0	0	0	0
Synpcc7942_0765	637799180		hypothetical protein	chromosome	+	757839	758327	0	0.0750957	209.459	0		0.0278115	0.0179301	0.00890668	0.00615355	0.0213947	0.0193807	0.0226622	0.0198483	0.036431	0.0326663	0.0177894	0.0235762	0.0148894	0.00585986	1.01884	0.385549	-0.623877	-1.15735	0.640414	0.497785	0.723454	0.532176	1.40833	1.25097	0.374177	0.780493	0.117454	-1.2279	0	0	0	0	0	0
Synpcc7942_0766	637799181		DNA-damage-inducible protein	chromosome	+	758390	759037	0	0.0835025	288.746	0		0.022092	0.0302449	0.0224041	0.0185746	0.0204504	0.0162503	0.0195447	0.0266277	0.0322731	0.0142716	0.0414935	0.0254161	0.0262174	0.0221101	-0.0372033	0.415966	-0.0169597	-0.287394	-0.148597	-0.48026	-0.213949	0.232203	0.509609	-0.667579	0.872161	0.165018	0.209798	-0.0360181	0	0	0	0	0	0
Synpcc7942_0767	637799182		hypothetical protein	chromosome	+	759413	759847	0	0.0786418	5.14121	0		0.0444277	0.0438688	0.032262	0.0332037	0.0256539	0.0266281	0.0424591	0.0210726	0.0498564	0.0637793	0.0545392	0.0429094	0.0368231	0.0384259	-0.161985	-0.18025	-0.623611	-0.582101	-0.954266	-0.900498	-0.22737	-1.23808	0.00433497	0.359642	0.133847	-0.212151	-0.432832	-0.371367	0	0	0	0	0	0
Synpcc7942_0768	637799184		hypothetical protein	chromosome	+	760522	761178	1	0.588971	321.254	1	Dusk	1.88914	0.182908	0.177514	0.22259	2.87585	3.69598	2.80319	0.544135	4.13214	6.08727	8.31984	0.835598	0.713687	0.968242	0.453212	-2.91532	-2.95851	-2.63205	1.05948	1.42144	1.02255	-1.34248	1.58238	2.14128	2.59204	-0.723633	-0.95115	-0.511075	0	0	1	60	1	137
Synpcc7942_0769	637799185		hypothetical protein	chromosome	+	761226	762128	1	0.502575	351.822	1	Dusk	0.990836	0.14336	0.115757	0.12063	1.34627	1.77602	1.41598	0.271098	1.64861	2.52777	3.60816	0.539869	0.457982	0.647878	0.433622	-2.35538	-2.66392	-2.60443	0.875873	1.27555	0.948708	-1.43621	1.16816	1.78477	2.29817	-0.442415	-0.679734	-0.179301	0	0	0	0	0	0
Synpcc7942_0770	637799186		hypothetical protein	chromosome	+	762159	763643	1	0.454068	325.028	1	Dusk	0.73265	0.141702	0.115687	0.126848	0.831323	1.23384	1.04688	0.237471	0.787595	1.58125	2.01885	0.418857	0.363802	0.492694	0.501431	-1.86883	-2.16147	-2.0286	0.683716	1.25339	1.01634	-1.12394	0.605761	1.6113	1.96377	-0.305234	-0.50854	-0.0710011	0	0	0	0	0	0
Synpcc7942_0771	637799187		hypothetical protein	chromosome	-	763640	764854	1	0.154069	176.108	0		0.153171	0.231771	0.234995	0.201101	0.206657	0.20107	0.155054	0.213465	0.307272	0.288546	0.278576	0.185707	0.194158	0.169806	-0.33906	0.258499	0.278425	0.053718	0.0930323	0.0534967	-0.321428	0.1398	0.665315	0.574597	0.523869	-0.0611742	0.0030316	-0.190317	0	0	0	0	0	0
Synpcc7942_0772	637799188		hypothetical protein	chromosome	-	764984	765577	1	0.158972	174.948	0		0.198828	0.252668	0.256629	0.236066	0.174954	0.136502	0.178567	0.147965	0.13822	0.15569	0.15843	0.180223	0.219	0.208237	-0.362351	-0.0166286	0.00581566	-0.114678	-0.546898	-0.904944	-0.517402	-0.788611	-0.8869	-0.715193	-0.690026	-0.504085	-0.222938	-0.295642	0	0	0	0	0	0
Synpcc7942_0773	637799189	ycf52	conserved hypothetical protein YCF52	chromosome	-	765592	766197	0	0.192212	100.753	0		0.721686	0.875762	0.975845	0.762699	0.592731	0.519559	0.721025	0.532093	0.568774	0.49528	0.507637	0.489197	0.561489	0.632831	-0.27522	0.00394825	0.160061	-0.195477	-0.559213	-0.749304	-0.276542	-0.714913	-0.618734	-0.818347	-0.782793	-0.836174	-0.637331	-0.46477	0	0	0	0	1	138
Synpcc7942_0774	637799190		esterase	chromosome	+	766216	767103	0	0.0774177	129.174	0		0.405447	0.445477	0.444692	0.405278	0.45241	0.436386	0.388649	0.306646	0.451824	0.468648	0.482684	0.306024	0.33289	0.391529	0.0579967	0.193834	0.191289	0.0573932	0.216114	0.164087	-0.00305149	-0.344944	0.214243	0.266988	0.30956	-0.347875	-0.226473	0.00759942	0	0	0	0	0	0
Synpcc7942_0775	637799191		hypothetical protein	chromosome	-	767242	767721	0	0.143619	89.8859	0		0.380258	0.51468	0.597855	0.677044	0.376341	0.37075	0.355102	0.494277	0.379209	0.229448	0.209237	0.392298	0.446969	0.436786	-0.340422	0.0962759	0.312394	0.49185	-0.355361	-0.376953	-0.439166	0.0379185	-0.344406	-1.06923	-1.20226	-0.295452	-0.107226	-0.140476	0	0	0	0	0	0
Synpcc7942_0776	637799192	crtE	farnesyl-diphosphate synthase	chromosome	-	767721	768626	1	0.303327	110.161	1	Dawn	0.816115	1.10665	1.34229	1.42483	0.836805	0.80313	0.823012	1.15282	0.894244	0.588323	0.528958	0.87014	1.00347	1.09116	-0.354961	0.0843962	0.36289	0.448986	-0.318843	-0.378101	-0.34282	0.143357	-0.223066	-0.827126	-0.980583	-0.262487	-0.0568042	0.0640519	0	0	0	0	0	0
Synpcc7942_0777	637799193	folD	Methenyltetrahydrofolate cyclohydrolase	chromosome	-	768669	769538	1	0.0925828	73.8438	0		0.343081	0.331387	0.37435	0.377	0.400842	0.434521	0.405181	0.340261	0.401522	0.346921	0.464492	0.295949	0.373811	0.390297	-0.0587745	-0.108804	0.0670657	0.0772438	0.165713	0.282105	0.181246	-0.0706815	0.168158	-0.0427171	0.378331	-0.271975	0.0649857	0.12725	0	0	0	0	0	0
Synpcc7942_0778	637799194		hypothetical protein	chromosome	+	769574	770038	0	0.0693618	171.482	0		0.189335	0.180791	0.149862	0.156602	0.164992	0.192487	0.170228	0.219163	0.224871	0.247698	0.239796	0.271542	0.182676	0.193086	0.130157	0.0635404	-0.207151	-0.143685	-0.0683911	0.153977	-0.023319	0.341219	0.378311	0.517796	0.471023	0.650391	0.0785003	0.158454	0	0	0	0	0	0
Synpcc7942_0779	637799195		metal dependent phosphohydrolase	chromosome	+	770131	772593	0	0.108255	126.353	0		0.455681	0.568314	0.491003	0.393148	0.28431	0.356564	0.412652	0.292264	0.320766	0.378208	0.516295	0.411462	0.439083	0.436084	-0.160607	0.158057	-0.0529009	-0.373559	-0.841167	-0.514471	-0.303706	-0.801359	-0.667111	-0.429454	0.0195637	-0.307872	-0.214137	-0.224027	0	0	0	0	0	0
Synpcc7942_0780	637799196		serine/threonine protein kinase	chromosome	-	772585	773958	1	0.158148	19.9494	1	Dusk	0.354243	0.114862	0.100378	0.110815	0.593912	0.529575	0.406726	0.161292	0.924506	1.08426	1.01298	0.281686	0.172044	0.233923	0.384451	-1.24038	-1.43484	-1.29214	1.12996	0.964545	0.583767	-0.750611	1.76839	1.99834	1.90025	0.0537985	-0.657515	-0.214254	0	0	0	0	0	0
Synpcc7942_0781	637799197	ppsA, pps	phosphoenolpyruvate synthase	chromosome	-	774004	776520	1	0.570498	307.683	1	Dusk	0.584113	0.0502026	0.0505655	0.0674265	2.5873	2.01734	0.752668	0.221297	4.9326	5.2077	4.25037	0.160967	0.156013	0.231674	0.442113	-3.0983	-3.08791	-2.67275	2.58924	2.23025	0.807881	-0.958148	3.52014	3.59844	3.30538	-1.41737	-1.46246	-0.892037	0	0	0	0	0	0
Synpcc7942_0782	637799198		ATPase	chromosome	-	776760	778556	0	0.0593532	340.509	0		0.359284	0.466389	0.496587	0.449772	0.425776	0.384993	0.394679	0.371777	0.403872	0.415451	0.473522	0.36813	0.413005	0.404494	-0.0780477	0.298362	0.388873	0.246022	0.166923	0.0216613	0.0575057	-0.0287367	0.0907266	0.131505	0.32026	-0.0429554	0.122988	0.092944	0	0	0	0	0	0
Synpcc7942_0783	637799199	hisG	ATP phosphoribosyltransferase catalytic subunit	chromosome	-	778589	779245	0	0.191587	84.9926	0		0.495708	0.50084	0.521495	0.567009	0.569013	0.580202	0.525297	0.470271	0.504581	0.428681	0.429714	0.379362	0.467665	0.588069	-0.0274488	-0.0125894	0.0457151	0.166433	0.171524	0.199617	0.0561948	-0.103446	-0.00185186	-0.237033	-0.233562	-0.413365	-0.111463	0.219047	0	0	0	0	0	0
Synpcc7942_0784	637799200		hypothetical protein	chromosome	+	779531	779848	0	0.171788	315.39	0		0.677515	0.259499	0.205442	0.266843	0.657987	0.589425	0.42648	0.456125	0.981591	0.906822	0.805739	0.536903	0.392285	0.36344	0.625737	-0.758785	-1.09579	-0.718522	0.583542	0.424794	-0.0420386	0.0549138	1.16061	1.0463	0.875796	0.290147	-0.162612	-0.272797	0	0	0	0	0	0
Synpcc7942_0785	637799201	ponA, mrcB	Penicillin-binding protein 1A	chromosome	+	779781	781919	0	0.0596485	245.956	0		0.0679305	0.0354446	0.0316737	0.0295422	0.0485846	0.0497218	0.0515618	0.0436108	0.0604725	0.067604	0.068397	0.065704	0.0442507	0.0428682	0.357661	-0.580833	-0.743111	-0.84362	-0.1259	-0.0925201	-0.040096	-0.281712	0.189882	0.350711	0.367536	0.309584	-0.260698	-0.30649	0	0	0	0	0	0
Synpcc7942_0786	637799202		hypothetical protein	chromosome	+	782076	782942	0	0.248475	134.61	0		0.127965	0.14158	0.185869	0.181864	0.120669	0.0947352	0.0827775	0.143043	0.0991645	0.0824242	0.0565521	0.132973	0.127088	0.165252	-0.0464941	0.0993687	0.492041	0.460614	-0.131193	-0.480273	-0.674936	0.114206	-0.41435	-0.681107	-1.22459	0.00888555	-0.0564236	0.322423	0	0	0	0	0	0
Synpcc7942_0787	637799203	phoA	putative purple acid phosphatase	chromosome	+	783007	783885	0	0.137658	185.285	0		0.420185	0.261105	0.222971	0.201975	0.193608	0.316265	0.428649	0.330643	0.301363	0.379714	0.388661	0.676398	0.315314	0.308606	-0.136838	-0.823234	-1.05101	-1.19368	-1.25472	-0.546728	-0.108065	-0.482589	-0.61636	-0.282949	-0.249348	0.550011	-0.551071	-0.582095	0	0	0	0	0	0
Synpcc7942_0788	637799204	gst1	glutathione S-transferase	chromosome	-	783954	784748	1	0.302706	171.409	1	Dawn	0.785107	0.923169	0.963598	0.876609	0.623771	0.650355	0.756047	1.04247	0.715124	0.748723	0.811707	1.28166	0.963465	1.02004	-0.299167	-0.0654616	-0.00362439	-0.140122	-0.631039	-0.570829	-0.353579	0.109885	-0.433862	-0.367625	-0.251096	0.407889	-0.0038231	0.0784924	0	0	0	0	0	0
Synpcc7942_0789	637799205		hypothetical protein	chromosome	-	784844	785167	1	0.269263	261.506	1	Dusk	0.724617	0.59853	0.476461	0.421644	0.523099	0.529759	0.456043	0.642393	0.619166	0.965279	0.710271	0.708262	0.576782	0.468735	0.578358	0.302564	-0.0265005	-0.202836	0.108225	0.126477	-0.0896916	0.404597	0.351467	0.992086	0.54951	0.545423	0.249167	-0.0500886	0	0	0	0	0	0
Synpcc7942_0790	637799206	rbp3	RNA-binding region RNP-1	chromosome	-	785282	785710	0	0.235205	167.801	0		8.16556	15.1372	16.818	11.4472	4.42216	5.38537	7.29071	6.72443	2.13048	2.37716	2.9181	6.6672	9.52689	8.34817	-0.192449	0.698027	0.849929	0.294915	-1.07725	-0.792957	-0.355942	-0.47259	-2.13082	-1.97276	-1.67697	-0.484921	0.0300034	-0.160542	0	0	0	0	1	141
Synpcc7942_0791	637799207	pcnB	polyA polymerase	chromosome	-	785973	787211	0	0.0749999	131.531	0		0.100521	0.139866	0.139047	0.116089	0.084439	0.106237	0.103497	0.0913917	0.0950221	0.0800692	0.111697	0.110329	0.123014	0.109855	-0.351868	0.124676	0.116204	-0.144135	-0.603386	-0.272084	-0.309779	-0.489231	-0.433031	-0.680047	-0.199771	-0.217551	-0.0605438	-0.22377	0	0	0	0	0	0
Synpcc7942_0792	637799208		putative multidrug efflux MFS transporter	chromosome	-	787255	788490	0	0.12414	223.773	0		0.203268	0.264971	0.244705	0.178695	0.189038	0.172095	0.217743	0.172321	0.180479	0.188415	0.246971	0.216308	0.22424	0.171171	-0.00176699	0.380688	0.265899	-0.187649	-0.10647	-0.24194	0.0974788	-0.240051	-0.173317	-0.111231	0.279192	0.0879423	0.139899	-0.249709	0	0	0	0	0	0
Synpcc7942_0793	637799209		hypothetical protein	chromosome	-	788593	789261	0	0.0977289	350.669	0		1.19725	0.700008	0.526608	0.546943	0.762104	0.738215	0.767501	0.795518	1.32913	1.30193	1.01541	1.16362	0.630507	0.753132	0.0730717	-0.701205	-1.11185	-1.05719	-0.578588	-0.624535	-0.568407	-0.516682	0.223837	0.194007	-0.164579	0.0319778	-0.852064	-0.595673	0	0	0	0	0	0
Synpcc7942_0794	637799210		membrane-associated 30 kD protein-like	chromosome	-	789460	790233	1	0.259908	16.6256	1	Dusk	5.32858	5.03161	3.87269	3.85116	4.87235	5.0066	5.43388	4.40704	5.54798	5.60919	5.77787	4.87138	5.6479	4.93375	0.1382	0.0554676	-0.322217	-0.330258	0.00906524	0.0482792	0.16643	-0.135742	0.19641	0.21224	0.254987	0.00877895	0.222163	0.0271315	0	0	0	0	1	142
Synpcc7942_0795	637799211		hypothetical protein	chromosome	-	790436	791047	0	0.11491	290.775	0		0.218711	0.196358	0.149449	0.163238	0.174366	0.184106	0.185387	0.242293	0.235404	0.344808	0.227425	0.333699	0.205421	0.162314	0.335871	0.180332	-0.2135	-0.0861749	0.00897061	0.0873863	0.0973887	0.483598	0.441988	0.992641	0.392237	0.945394	0.245431	-0.0943614	0	0	0	0	0	0
Synpcc7942_0796	637799212		hypothetical protein	chromosome	+	791175	791720	1	0.361517	354.765	0		0.214996	0.248431	0.240192	0.208321	0.233766	0.264219	0.315077	0.161961	0.198604	0.238668	0.317196	0.219193	0.215139	0.269403	-0.0281855	0.180351	0.131693	-0.0736857	0.0925688	0.269238	0.52321	-0.436851	-0.142602	0.122508	0.532879	-0.00029464	-0.0272278	0.297272	0	0	0	0	0	0
Synpcc7942_0797	637799213		hypothetical protein	chromosome	+	792010	792270	1	1.03597	348.929	1	Dusk	2.51483	0.545396	0.574782	0.571842	1.109	0.798842	0.750111	1.16726	2.09813	1.98424	1.63314	0.321821	0.366372	0.539792	0.610702	-1.59438	-1.51867	-1.52607	-0.570502	-1.04378	-1.13458	-0.496635	0.349343	0.268832	-0.0121052	-2.35543	-2.16838	-1.60928	1	36	1	61	1	143
Synpcc7942_0798	637799214	ruvC	Holliday junction resolvase	chromosome	-	792319	792804	0	0.0852682	295.471	0		0.132552	0.25151	0.252918	0.198129	0.154992	0.145169	0.220421	0.12981	0.117936	0.0899543	0.196891	0.175089	0.218728	0.165089	-0.269692	0.654368	0.662421	0.310193	-0.0440507	-0.138512	0.464011	-0.299846	-0.438239	-0.828984	0.301148	0.131838	0.452889	0.0469954	0	0	0	0	0	0
Synpcc7942_0799	637799215		Elongator protein 3	chromosome	-	792810	794390	1	0.201379	27.0982	0		0.210976	0.310236	0.291398	0.289299	0.281898	0.279739	0.278039	0.224074	0.22781	0.196223	0.257603	0.224318	0.237632	0.216587	-0.0760631	0.480222	0.38985	0.379416	0.342029	0.330939	0.322143	0.0108345	0.0346903	-0.180651	0.212009	0.0123996	0.0955869	-0.0381973	0	0	0	0	0	0
Synpcc7942_0800	637799216	cpcT	hypothetical protein	chromosome	-	794455	795048	1	0.365	208.27	0		0.302459	0.186679	0.244409	0.421475	0.4321	0.336824	0.276291	0.448435	0.495507	0.324119	0.150442	0.243995	0.254955	0.29909	-0.355123	-1.0513	-0.662567	0.123582	0.159501	-0.199868	-0.485677	0.213034	0.357041	-0.255342	-1.36266	-0.665014	-0.601618	-0.371286	0	0	0	0	0	0
Synpcc7942_0801	637799217	sodB, sod1	Superoxide dismutase	chromosome	+	795123	795812	0	0.15449	144.779	0		3.03325	5.18595	6.38857	6.31995	3.14567	2.6997	3.26949	4.64425	3.60449	2.90233	2.37016	3.31223	3.48993	4.32451	-0.413531	0.360215	0.6611	0.64552	-0.361026	-0.581597	-0.30533	0.201051	-0.164599	-0.47718	-0.769409	-0.286592	-0.211197	0.0981429	0	0	0	0	0	0
Synpcc7942_0802	637799218		allophycocyanin alpha chain-like	chromosome	+	795917	796504	0	0.0728006	94.0463	0		0.148512	0.29384	0.367885	0.376647	0.211138	0.170131	0.231545	0.223754	0.148852	0.140121	0.142562	0.191399	0.186564	0.234728	-0.512479	0.47197	0.796195	0.830155	-0.00487687	-0.316418	0.12823	0.0788547	-0.509185	-0.596386	-0.571467	-0.146478	-0.183391	0.147932	0	0	0	0	0	0
Synpcc7942_0803	637799220		hypothetical protein	chromosome	-	796507	797289	0	0.0336294	353.954	0		0.318124	0.23647	0.257725	0.234424	0.297514	0.340247	0.276995	0.198331	0.352161	0.361845	0.363594	0.223662	0.195894	0.216527	0.123059	-0.304875	-0.1807	-0.31741	0.0264261	0.220052	-0.0766706	-0.558626	0.269701	0.308841	0.315798	-0.385214	-0.576458	-0.431987	0	0	0	0	0	0
Synpcc7942_0804	637799221	pdxA	4-hydroxythreonine-4-phosphate dehydrogenase	chromosome	+	797288	798349	0	0.0528279	34.6965	0		0.50482	0.612884	0.606962	0.586517	0.512263	0.536425	0.630564	0.442742	0.570341	0.523277	0.668695	0.434745	0.544814	0.591802	0.0427389	0.322583	0.308576	0.259141	0.0638538	0.130345	0.363613	-0.146565	0.218794	0.0945444	0.448318	-0.172862	0.152732	0.272083	0	0	0	0	0	0
Synpcc7942_0805	637799222		hypothetical protein	chromosome	+	798349	799095	0	0.0757733	212.605	0		0.613252	0.717362	0.712614	0.552673	0.510728	0.6273	0.646387	0.598402	0.585842	0.581868	0.62355	0.646733	0.636148	0.65723	0.0123945	0.238616	0.229035	-0.137659	-0.25153	0.045071	0.0883139	-0.0229711	-0.0535738	-0.0633922	0.0364194	0.0890847	0.0652779	0.112314	0	0	0	0	0	0
Synpcc7942_0806	637799223		hypothetical protein	chromosome	+	799095	799826	0	0.100092	339.057	0		0.32171	0.437546	0.353031	0.319818	0.252498	0.333744	0.352525	0.296124	0.23279	0.230855	0.27765	0.342742	0.322271	0.326215	0.148669	0.592344	0.282702	0.140161	-0.20082	0.201649	0.280636	0.0291112	-0.318062	-0.330102	-0.0638209	0.240034	0.151184	0.168732	0	0	0	0	0	0
Synpcc7942_0807	637799224		hypothetical protein	chromosome	+	799840	800679	1	0.395472	10.5419	0		0.276087	0.23209	0.159582	0.149738	0.190973	0.216872	0.288354	0.141864	0.34855	0.408353	0.453779	0.27188	0.187224	0.240495	0.366012	0.115574	-0.424815	-0.51667	-0.165741	0.0177332	0.428732	-0.594601	0.702257	0.930708	1.08288	0.34386	-0.194342	0.166898	0	0	0	0	0	0
Synpcc7942_0808	637799225	sps	HAD-superfamily hydrolase subfamily IIB	chromosome	-	800851	802980	1	0.256894	223.715	0		0.2312	0.169013	0.091106	0.0875884	0.0871014	0.164132	0.204889	0.275934	0.264367	0.365499	0.373875	0.517544	0.263663	0.192377	-0.140186	-0.592198	-1.48371	-1.54052	-1.54856	-0.634468	-0.314487	0.114996	0.0532138	0.520539	0.553227	1.02235	0.0493692	-0.405394	0	0	0	0	0	0
Synpcc7942_0809	637799226		hypothetical protein	chromosome	+	803073	804815	0	0.100166	183.869	0		0.284587	0.208314	0.23905	0.279674	0.280507	0.29905	0.277931	0.38082	0.399943	0.387323	0.299903	0.382685	0.255926	0.261942	-0.1274	-0.577511	-0.378961	-0.152524	-0.148235	-0.0558841	-0.161542	0.292837	0.363522	0.317265	-0.0517762	0.299887	-0.280544	-0.247022	0	0	0	0	0	0
Synpcc7942_0810	637799227		hypothetical protein	chromosome	+	804853	805086	0	0.0598012	46.5735	0		0.186592	0.114612	0.0971995	0.105447	0.175857	0.0990017	0.112758	0.177433	0.182054	0.186828	0.131803	0.199419	0.147278	0.163275	0.680319	-0.0228093	-0.260549	-0.143057	0.594831	-0.234044	-0.0463427	0.607702	0.644794	0.682142	0.178813	0.776231	0.338975	0.487732	0	0	0	0	0	0
Synpcc7942_0811	637799228	nha1	Na+/H+ antiporter	chromosome	+	805186	806769	1	0.147058	119.111	0		0.195213	0.260157	0.297873	0.301289	0.225003	0.202094	0.197224	0.23216	0.222489	0.16029	0.16076	0.19478	0.236569	0.250548	-0.209216	0.205118	0.400436	0.416883	-0.00431768	-0.159233	-0.194431	0.0408584	-0.0205283	-0.493578	-0.489358	-0.212419	0.0679998	0.150824	0	0	0	0	0	0
Synpcc7942_0812	637799229		Heat shock protein DnaJ-like	chromosome	+	806893	807813	0	0.175964	276.783	0		1.00334	0.846152	0.708818	0.690685	0.817118	0.8758	0.839976	0.836041	1.04199	1.25881	1.14802	0.835105	0.863805	0.82967	0.39493	0.149115	-0.106387	-0.143774	0.0987428	0.198801	0.138546	0.131772	0.44947	0.722185	0.58927	0.130157	0.178904	0.120736	0	0	0	0	1	144
Synpcc7942_0813	637799230	hisS, hisZ	ATP phosphoribosyltransferase regulatory subunit	chromosome	+	807839	809101	0	0.127444	327.276	0		0.640405	0.715033	0.634894	0.598958	0.504185	0.602797	0.587037	0.70059	0.651902	0.694947	0.796453	0.728072	0.815527	0.68971	0.0565479	0.215574	0.0440798	-0.0399808	-0.288482	-0.0307643	-0.0689852	0.186135	0.0822194	0.174468	0.371153	0.241645	0.405296	0.163553	0	0	0	0	0	0
Synpcc7942_0814	637799231		ferredoxin-like protein	chromosome	+	809134	809358	0	0.196971	115.659	0		0.483549	0.73581	0.664597	0.631239	0.520774	0.514809	0.530052	0.460127	0.437194	0.336291	0.386622	0.551428	0.55443	0.543378	-0.115821	0.489851	0.342996	0.268704	-0.00882433	-0.0254455	0.0166503	-0.187452	-0.261211	-0.639774	-0.438559	0.0736892	0.0815227	0.0524744	0	0	0	0	0	0
Synpcc7942_0815	637799232	livF	ATPase	chromosome	+	809365	810096	0	0.187101	12.0379	0		0.304109	0.541824	0.531529	0.414366	0.323007	0.339498	0.3482	0.30128	0.263476	0.217073	0.279811	0.320243	0.346143	0.334697	-0.190391	0.642847	0.615171	0.255927	-0.103414	-0.0315761	0.00493676	-0.203871	-0.397308	-0.676799	-0.310525	-0.115811	-0.00360976	-0.0521245	0	0	0	0	0	0
Synpcc7942_0816	637799233		diguanylate cyclase/phosphodiesterase	chromosome	-	810181	812226	0	0.12671	163.186	0		0.0920088	0.149231	0.139077	0.12001	0.0484067	0.0581579	0.0851139	0.09593	0.0461856	0.0439676	0.0552722	0.131746	0.153732	0.121145	-0.430868	0.266836	0.165166	-0.0475524	-1.35743	-1.09267	-0.543245	-0.370658	-1.4252	-1.4962	-1.16609	0.0870506	0.309709	-0.0339738	0	0	0	0	0	0
Synpcc7942_0817	637799234		putative ferric uptake regulator, FUR family	chromosome	-	812331	812723	0	0.211122	99.2927	0		0.238593	0.295279	0.252431	0.235827	0.193445	0.275982	0.265867	0.189341	0.147816	0.207508	0.332023	0.255636	0.269253	0.274638	-0.165174	0.142353	-0.0838361	-0.182001	-0.467806	0.0448463	-0.00902115	-0.498739	-0.855926	-0.366564	0.311554	-0.0656389	0.00923342	0.0378043	0	0	0	0	0	0
Synpcc7942_0818	637799235	purS	phosphoribosylformylglycinamidine synthase subunit PurS	chromosome	+	812955	813224	0	0.220545	101.345	0		1.21948	1.64277	2.05939	2.12865	1.59126	1.29482	1.25086	1.39196	1.11593	0.90923	0.738096	1.00648	1.50113	1.66976	-0.431523	-0.00165048	0.324431	0.372153	-0.0476198	-0.34503	-0.394865	-0.240664	-0.559534	-0.855067	-1.1559	-0.70847	-0.131734	0.0218529	0	0	0	0	1	145
Synpcc7942_0819	637799236	purL, purQ	phosphoribosylformylglycinamidine synthase subunit I	chromosome	+	813221	813886	0	0.167581	102.373	0		1.11773	1.531	2.04907	2.07112	1.47557	1.22852	1.29312	1.49781	1.06996	0.828103	0.660202	0.901791	1.43141	1.62707	-0.235918	0.217981	0.638475	0.653915	0.164777	-0.0995719	-0.0256408	0.186358	-0.298943	-0.668613	-0.995515	-0.54563	0.12094	0.305778	0	0	0	0	0	0
Synpcc7942_0820	637799237		hypothetical protein	chromosome	+	813960	814394	0	0.0703434	155.254	0		0.865518	1.14415	1.43176	1.25344	0.976452	0.832732	0.897707	0.991653	0.897416	0.75762	0.787182	0.84683	1.08015	1.02323	-0.097909	0.304727	0.628249	0.436349	0.0760769	-0.15362	-0.045227	0.0983624	-0.0456954	-0.289997	-0.234776	-0.1294	0.221682	0.143581	0	0	0	0	0	0
Synpcc7942_0821	637799238	ddpA	periplasmic oligopeptide-binding	chromosome	+	814476	816077	0	0.144834	184.676	0		0.173807	0.189947	0.22384	0.167923	0.121033	0.144609	0.155479	0.188488	0.136345	0.139596	0.160928	0.227888	0.185432	0.174397	-0.231737	-0.103623	0.133248	-0.281423	-0.753816	-0.49706	-0.392501	-0.114746	-0.581959	-0.54796	-0.342806	0.159106	-0.138329	-0.226848	0	0	0	0	0	0
Synpcc7942_0822	637799239	appB, dppB	permease protein of oligopeptide ABC	chromosome	+	816064	817089	0	0.0904132	146.759	0		0.179991	0.168399	0.199043	0.181249	0.153633	0.115976	0.168187	0.19708	0.141926	0.152412	0.162634	0.285731	0.223301	0.194569	-0.335323	-0.431364	-0.19017	-0.325278	-0.563765	-0.969429	-0.433184	-0.20447	-0.678109	-0.575271	-0.481622	0.331404	-0.0242611	-0.222969	0	0	0	0	0	0
Synpcc7942_0823	637799240		hypothetical protein	chromosome	+	817168	818214	0	0.0880894	45.3679	0		0.329519	0.269454	0.319384	0.344306	0.287113	0.275575	0.378013	0.247203	0.230813	0.248926	0.311946	0.329812	0.24942	0.319298	-0.148316	-0.438638	-0.193382	-0.0849833	-0.347054	-0.40623	0.0497614	-0.56298	-0.66195	-0.55296	-0.227378	-0.14703	-0.550096	-0.193771	0	0	0	0	0	0
Synpcc7942_0824	637799241		hypothetical protein	chromosome	+	818189	819895	0	0.0462626	281.94	0		0.226852	0.213614	0.217726	0.204131	0.179372	0.168409	0.231857	0.166786	0.120698	0.13495	0.193187	0.20776	0.180851	0.169265	0.0484767	-0.0382722	-0.0107645	-0.103779	-0.290324	-0.381308	0.0799583	-0.39528	-0.861873	-0.700855	-0.183275	-0.0783592	-0.278479	-0.373994	0	0	0	0	0	0
Synpcc7942_0825	637799242		hypothetical protein	chromosome	-	819956	820654	1	0.0961062	199.72	0		0.196609	0.215451	0.184849	0.200606	0.139693	0.120517	0.129851	0.205193	0.141836	0.0962205	0.0746695	0.193206	0.146522	0.151677	0.23879	0.370822	0.149805	0.267824	-0.254282	-0.467301	-0.359688	0.300445	-0.232319	-0.792123	-1.15795	0.213601	-0.185426	-0.135533	0	0	0	0	0	0
Synpcc7942_0826	637799243		hypothetical protein	chromosome	+	820693	821628	0	0.124862	219.886	0		0.148356	0.179082	0.215597	0.238541	0.145305	0.102377	0.0969717	0.180313	0.190329	0.0997016	0.0971624	0.154843	0.132239	0.158683	-0.375204	-0.103652	0.164068	0.309968	-0.40518	-0.910379	-0.988633	-0.0937639	-0.0157742	-0.94858	-0.985798	-0.313464	-0.541117	-0.278124	0	0	0	0	0	0
Synpcc7942_0827	637799244	cobW	cobalamin synthesis protein cobW-like	chromosome	-	821757	822803	1	0.26377	14.8036	1	Dusk	0.596825	0.770923	0.701629	0.626534	0.67948	0.741237	1.05844	0.569081	0.441652	0.449672	0.79686	0.848388	0.814093	0.920491	-0.182274	0.187005	0.0511255	-0.11219	0.00484834	0.130352	0.644282	-0.250947	-0.616672	-0.590708	0.234745	0.325143	0.265612	0.442822	0	0	0	0	0	0
Synpcc7942_0828	637799245		hypothetical protein	chromosome	-	822873	823241	1	0.343142	22.1033	1	Dusk	0.362739	0.545107	0.410488	0.357176	0.457417	0.527936	0.637824	0.362397	0.474389	0.503525	0.647227	0.431454	0.623517	0.588884	-0.251926	0.335679	-0.0735207	-0.274224	0.0826491	0.289504	0.562299	-0.25329	0.135211	0.221203	0.583413	-0.00165302	0.529569	0.447125	0	0	0	0	1	146
Synpcc7942_0829	637799246		Lipoproteins-like	chromosome	+	823506	823838	1	0.235048	51.8627	1	Dawn	0.748022	4.85243	3.53283	1.72051	0.230394	0.55655	0.892188	0.947263	0.209339	0.232273	0.244607	2.63613	2.54213	2.53561	-0.224215	2.47334	2.01546	0.977469	-1.92319	-0.650784	0.0300524	0.116469	-2.06145	-1.91148	-1.83683	1.59305	1.54067	1.53697	0	0	0	0	1	146
Synpcc7942_0830	637799247	asnC, asnS	asparaginyl-tRNA synthetase	chromosome	+	823942	825330	0	0.159859	49.5714	0		0.376184	1.29291	1.15425	0.818021	0.43033	0.388912	0.526947	0.490298	0.310603	0.295979	0.35527	0.660841	0.796762	0.660496	-0.241163	1.53995	1.37629	0.879537	-0.0471575	-0.193157	0.245056	0.141058	-0.517529	-0.587104	-0.323684	0.571702	0.841549	0.570949	0	0	0	0	0	0
Synpcc7942_0831	637799248		hypothetical protein	chromosome	-	825403	826005	0	0.0784905	279.308	0		0.0664737	0.0547401	0.0666105	0.0429157	0.0589896	0.0436575	0.0446319	0.079585	0.0976223	0.114328	0.11541	0.0946845	0.0684223	0.0570243	0.0213067	-0.258879	0.0242723	-0.609974	-0.151016	-0.585249	-0.553403	0.281019	0.575732	0.803625	0.817213	0.53165	0.0629891	-0.199901	0	0	0	0	0	0
Synpcc7942_0833	637799249		hypothetical protein	chromosome	+	827112	828182	0	0.0829237	163.467	0		0.553376	0.536462	0.569329	0.525958	0.537915	0.527984	0.538546	0.51152	0.679092	0.632704	0.65643	0.46441	0.620002	0.650149	-0.0459668	-0.0907507	-0.0049646	-0.11928	-0.0868492	-0.113732	-0.0851565	-0.159435	0.24938	0.147303	0.200415	-0.298828	0.118045	0.186544	0	0	0	0	0	0
Synpcc7942_0834	637799250		hypothetical protein	chromosome	+	828582	829235	1	2.57285	348.71	1	Dusk	8.6802	5.19382	1.82399	1.33338	6.28679	11.4415	20.0004	0.380086	2.54514	7.21945	23.6907	8.13073	4.26985	6.62111	-0.92757	-1.6685	-3.1782	-3.63021	-1.39297	-0.529092	0.276659	-5.4409	-2.69755	-1.19341	0.520949	-1.02191	-1.95111	-1.31822	0	0	0	0	1	147
Synpcc7942_0835	637799251	ruvB	Holliday junction DNA helicase B	chromosome	+	829661	830788	1	0.228655	154.362	0		0.252554	0.216727	0.232526	0.225148	0.234344	0.222179	0.207714	0.230886	0.257499	0.227324	0.220139	0.242372	0.193642	0.235826	-0.251811	-0.472523	-0.371005	-0.417527	-0.359775	-0.436675	-0.5338	-0.381222	-0.223836	-0.403649	-0.449985	-0.311175	-0.635008	-0.350679	0	0	0	0	0	0
Synpcc7942_0836	637799252		hypothetical protein	chromosome	-	831166	832182	1	0.0942315	15.5553	0		0.0232259	0.0126783	0.0114202	0.00532582	0.00548646	0.00517708	0.0103777	0.0121945	0.0152322	0.0140534	0.0147744	0.341161	0.0195686	0.0126791	0.548228	-0.32514	-0.475922	-1.57643	-1.53356	-1.61729	-0.614018	-0.38127	-0.0603853	-0.176582	-0.104409	4.42487	0.301032	-0.325056	0	0	0	0	0	0
Synpcc7942_0837	637799253		hypothetical protein	chromosome	-	832179	832811	0	0.0657758	215.258	0		0.0169616	0.0252581	0.013761	0.00665517	0.00440737	0.00499061	0.0216751	0.010222	0.0281434	0.0265632	0.0187398	0.904573	0.042175	0.0226341	-0.443359	0.131117	-0.745043	-1.79308	-2.38764	-2.20834	-0.0895899	-1.17395	0.287165	0.2038	-0.299529	5.29353	0.870757	-0.0271359	0	0	0	0	0	0
Synpcc7942_0838	637799254		Elongator protein 3/MiaB/NifB	chromosome	-	832860	833957	0	0.146307	230.023	0		0.0241201	0.0389869	0.00925548	0.0137026	0.00571693	0.0230168	0.0273946	0.0329027	0.0479688	0.0267991	0.0165654	1.57397	0.0795731	0.0260972	-0.530709	0.162047	-1.91256	-1.3465	-2.60763	-0.598256	-0.347052	-0.0827386	0.461154	-0.378758	-1.07277	5.49732	1.19134	-0.417049	0	0	0	0	0	0
Synpcc7942_0839	637799255	merR	Nitrilase	chromosome	-	833950	834954	0	0.201707	158.868	0		0.0427331	0.0636354	0.0168533	0.0215576	0.0166559	0.104778	0.0572338	0.0713583	0.0447007	0.0602312	0.0180983	2.66792	0.180635	0.0427682	-0.422696	0.151779	-1.76502	-1.40985	-1.78202	0.871213	-0.00118262	0.31703	-0.357753	0.0724594	-1.6622	5.54152	1.65695	-0.421511	0	0	0	0	0	0
Synpcc7942_0840	637799256		hypothetical protein	chromosome	-	834991	835473	0	0.18418	171.672	0		0.0711334	0.142019	0.0450866	0.0386259	0.0245485	0.161332	0.114719	0.132849	0.0930108	0.10966	0.037658	5.56262	0.832108	0.119642	-0.697111	0.300378	-1.35494	-1.57807	-2.232	0.484323	-0.00760863	0.204078	-0.31024	-0.0726729	-1.61468	5.59198	2.85106	0.0530122	1	37	0	0	0	0
Synpcc7942_0841	637799257		putative flavoprotein involved in K+ transport	chromosome	+	835671	837011	0	0.134636	126.061	0		0.0640519	0.0738441	0.0404177	0.0296196	0.0249652	0.136633	0.0724071	0.071171	0.072777	0.0909063	0.0572031	0.545303	0.104246	0.0612554	-0.10644	0.098801	-0.770695	-1.21913	-1.46576	0.986556	0.0704505	0.0456088	0.0778016	0.398699	-0.269589	2.98331	0.59624	-0.170844	0	0	0	0	0	0
Synpcc7942_0842	637799258	gor, gshR	glutathione reductase	chromosome	-	837065	838405	0	0.0555394	286.885	0		0.611162	1.13112	1.17428	1.17805	0.441572	0.513553	0.565091	0.836762	0.336738	0.279615	0.312553	0.606712	0.745287	0.761063	-0.014202	0.873927	0.927946	0.932577	-0.483107	-0.265244	-0.127274	0.439062	-0.874129	-1.14231	-0.981656	-0.0247456	0.272041	0.30226	0	0	0	0	0	0
Synpcc7942_0843	637799259		hypothetical protein	chromosome	-	838504	838935	1	0.236758	99.6258	1	Dawn	3.31711	4.61433	5.12719	5.29516	2.59128	2.54236	3.13081	3.73079	1.71048	1.51214	1.37295	2.95208	3.47755	4.14233	-0.00242266	0.473773	0.625819	0.672324	-0.358685	-0.386182	-0.0858116	0.167132	-0.957951	-1.13576	-1.27507	-0.170617	0.0657212	0.318094	0	0	0	0	0	0
Synpcc7942_0844	637799260		Phosphoesterase PHP-like	chromosome	-	839099	839809	0	0.0789194	139.794	0		0.868802	0.752959	0.737125	0.639907	0.786734	0.802723	0.753336	0.53011	1.00986	0.963702	1.02884	0.625429	0.630127	0.669013	-0.0621228	-0.268579	-0.299241	-0.503288	-0.205275	-0.176247	-0.267856	-0.774857	0.154939	0.0874377	0.181799	-0.536303	-0.525506	-0.439115	0	0	0	0	0	0
Synpcc7942_0845	637799261		hypothetical protein	chromosome	+	839873	840079	0	0.0936374	1.30962	0		0.0449524	0.034882	0.0187026	0.00872199	0.0269552	0.0203482	0.0305917	0.023444	0.0187091	0.0568607	0.0114611	0.0424339	0.0304838	0.0184571	-0.00703691	-0.372952	-1.2722	-2.3727	-0.74487	-1.15053	-0.562295	-0.946217	-1.2717	0.331999	-1.97868	-0.0902181	-0.56739	-1.29125	0	0	0	0	0	0
Synpcc7942_0846	637799262		hypothetical protein	chromosome	-	840263	841081	0	0.232393	37.9353	0		0.737629	0.83944	0.736235	0.685587	0.671918	0.531009	0.425258	0.626117	0.630804	0.603599	0.651773	0.665623	0.702313	0.523646	0.153274	0.339805	0.150544	0.0477172	0.0186625	-0.320884	-0.641284	-0.0831898	-0.0724299	-0.136032	-0.0252526	0.00508296	0.0824923	-0.341031	0	0	0	0	0	0
Synpcc7942_0847	637799263	pilT	twitching motility protein	chromosome	-	841120	842232	0	0.453482	41.3892	0		1.08042	1.20296	0.910901	0.886234	0.756998	0.632946	0.496414	0.904983	1.06893	1.06281	0.702712	0.866641	0.75666	0.593862	0.437242	0.592241	0.191013	0.151406	-0.0759918	-0.334198	-0.684738	0.18161	0.421812	0.413524	-0.183347	0.119154	-0.0766367	-0.426152	1	38	0	0	1	151
Synpcc7942_0848	637799264	uvrA	excinuclease ABC subunit A	chromosome	-	842336	845347	0	0.255882	169.591	0		0.18346	0.281508	0.343185	0.291118	0.162094	0.148234	0.153301	0.189941	0.118035	0.0990896	0.0884813	0.203045	0.202893	0.186148	-0.321828	0.295879	0.581692	0.34431	-0.500467	-0.629421	-0.580926	-0.271742	-0.958082	-1.21049	-1.37385	-0.175493	-0.176576	-0.300846	0	0	0	0	0	0
Synpcc7942_0849	637799265		hypothetical protein	chromosome	-	845822	846433	0	0.126982	16.156	0		2.64207	2.07145	2.31606	2.40137	4.34321	3.41887	2.41521	2.91896	4.63594	4.11434	2.65027	1.83803	2.22552	2.25679	-0.165885	-0.516914	-0.35588	-0.303696	0.551207	0.205966	-0.295407	-0.0220964	0.64531	0.473108	-0.161412	-0.68939	-0.413407	-0.393279	0	0	0	0	0	0
Synpcc7942_0850	637799266		hypothetical protein	chromosome	-	846479	846679	1	0.592142	108.082	1	Dawn	2.10105	2.5916	3.39714	3.72767	2.88355	2.31035	2.53877	3.27014	3.03657	2.32141	1.24721	2.6712	3.03071	3.32167	-0.43292	-0.130182	0.260292	0.394248	0.0238197	-0.295914	-0.1599	0.205325	0.098413	-0.289027	-1.18532	-0.0865423	0.0956266	0.22788	0	0	1	65	1	152
Synpcc7942_0851	637799267	purM	phosphoribosylaminoimidazole synthetase	chromosome	+	847233	848258	0	0.093333	86.7437	0		0.385796	0.671587	0.830133	0.909765	0.543833	0.440297	0.401695	0.521868	0.480889	0.478542	0.333747	0.348334	0.544533	0.502249	-0.191316	0.608422	0.914189	1.04634	0.304011	-0.000674692	-0.133053	0.244532	0.126551	0.119494	-0.400399	-0.338679	0.305867	0.18925	0	0	0	0	0	0
Synpcc7942_0853	637799268	dapL1	L,L-diaminopimelate aminotransferase	chromosome	+	848870	850105	1	0.291176	166.333	1	Dawn	0.703619	1.31109	1.93924	1.80253	0.904561	0.741202	0.72154	1.09238	0.588437	0.508789	0.348062	0.659585	0.832949	0.817602	-0.210065	0.687832	1.25256	1.14709	0.15236	-0.134991	-0.173778	0.424548	-0.467971	-0.67779	-1.22551	-0.3033	0.03337	0.00654125	0	0	0	0	1	154
Synpcc7942_0854	637799270		hypothetical protein	chromosome	+	850233	852629	0	0.120585	153.7	0		0.299212	0.378048	0.533393	0.563403	0.420167	0.376925	0.347621	0.4724	0.330567	0.214654	0.188714	0.30965	0.335545	0.409439	-0.302814	0.0345874	0.531215	0.610186	0.186981	0.0302963	-0.0864656	0.356027	-0.159037	-0.781972	-0.96778	-0.253343	-0.137476	0.149665	0	0	0	0	0	0
Synpcc7942_0855	637799271	pixG, pisG, taxP1, rer1, cheY, rre36	response regulator receiver domain protein (CheY-like)	chromosome	+	853629	854882	1	1.09853	183.388	1	Dawn	0.430381	0.298184	0.321848	0.332103	1.82153	0.812856	0.374949	0.503952	2.40643	1.47697	0.687393	0.184309	0.228376	0.255166	-0.74219	-1.2716	-1.16143	-1.11617	1.33928	0.175196	-0.941109	-0.514519	1.74102	1.03676	-0.0666689	-1.96568	-1.65639	-1.49637	1	39	1	66	0	0
Synpcc7942_0856	637799272	pilH/rre7, rre7	response regulator receiver domain protein (CheY-like)	chromosome	+	854933	855295	1	1.07545	182.156	1	Dawn	0.767048	0.467447	0.4546	0.469185	3.18951	1.54617	0.709423	0.766482	4.54064	2.86032	1.34199	0.314572	0.419874	0.635456	-0.863602	-1.57811	-1.61832	-1.57276	1.19235	0.147707	-0.976271	-0.864666	1.70191	1.03519	-0.0566121	-2.14953	-1.73296	-1.13513	0	0	0	0	0	0
Synpcc7942_0857	637799273		CheW protein	chromosome	+	855315	855821	1	0.999673	188.118	1	Dawn	0.515305	0.318405	0.276804	0.343048	1.80901	0.955401	0.448602	0.530703	2.80184	1.74612	1.04506	0.249048	0.276685	0.429538	-0.895935	-1.5905	-1.7925	-1.48295	0.915766	-0.00525478	-1.09592	-0.853458	1.54694	0.864723	0.124159	-1.94494	-1.79312	-1.15858	0	0	0	0	0	0
Synpcc7942_0858	637799274	pixJ1, pisJ1, taxD1, tsr, cheD	methyl-accepting chemotaxis sensory transducer with phytochrome sensor	chromosome	+	855893	860113	1	0.736766	178.736	1	Dawn	0.543491	0.367663	0.269538	0.302121	1.76705	1.14208	0.526706	0.476999	2.12971	1.83183	1.01883	0.299271	0.289674	0.434245	-0.782829	-1.3467	-1.7946	-1.62996	0.918183	0.288507	-0.828086	-0.971097	1.1875	0.970131	0.123752	-1.64363	-1.69066	-1.10658	0	0	0	0	0	0
Synpcc7942_0859	637799275		CheA signal transduction histidine kinase	chromosome	+	860118	862976	1	0.620743	192.88	1	Dusk	0.341241	0.259952	0.204303	0.206921	0.975086	0.70901	0.316919	0.258572	0.694093	1.04922	0.540765	0.213527	0.20696	0.24806	-0.541581	-0.934126	-1.28166	-1.26329	0.973158	0.513435	-0.648257	-0.941803	0.482757	1.07887	0.122632	-1.21795	-1.26302	-1.00168	0	0	0	0	0	0
Synpcc7942_0860	637799276		CheW protein	chromosome	+	862987	863946	0	0.451498	184.419	0		0.382495	0.333629	0.268682	0.265803	0.619001	0.668009	0.371593	0.267359	0.349357	0.96596	0.547806	0.332824	0.291238	0.301472	-0.37345	-0.570646	-0.882992	-0.898535	0.321051	0.430977	-0.415166	-0.890113	-0.504189	0.963073	0.144775	-0.574131	-0.766693	-0.716868	0	0	0	0	0	0
Synpcc7942_0861	637799277		bifunctional sterol desaturase/short chain dehydrogenase	chromosome	-	864180	865469	1	0.280553	41.757	1	Dawn	1.20628	1.48409	1.84606	1.71681	1.3533	1.3877	1.78234	1.09932	0.798573	0.748833	0.929977	1.30566	1.37679	1.62303	-0.185437	0.113578	0.428444	0.323726	-0.0195239	0.0166891	0.377766	-0.319392	-0.78051	-0.873289	-0.560738	-0.0712316	0.00530717	0.242682	0	0	0	0	1	157
Synpcc7942_0862	637799278		hypothetical protein	chromosome	+	865596	865973	1	0.544368	345.096	1	Dusk	0.808566	0.555323	0.587629	0.493554	0.747285	1.20902	1.35277	0.54777	0.456947	0.742864	1.03141	1.09943	0.888609	0.990534	-0.0261092	-0.568147	-0.48657	-0.738268	-0.139817	0.554293	0.716371	-0.587905	-0.849449	-0.148376	0.325072	0.417207	0.110073	0.266731	0	0	0	0	1	157
Synpcc7942_0863	637799279		hypothetical protein	chromosome	+	866027	867208	0	0.112393	127.824	0		1.27472	1.21172	1.20491	1.33296	1.44568	1.43164	1.47508	1.23353	1.40298	1.1672	1.16482	1.21316	1.29644	1.38506	-0.11502	-0.188143	-0.196271	-0.0505654	0.0665484	0.0524731	0.0955934	-0.162411	0.0232976	-0.242144	-0.245094	-0.186426	-0.0906392	0.00474992	0	0	0	0	0	0
Synpcc7942_0864	637799280		hypothetical protein	chromosome	+	867395	867913	0	0.24784	131.074	0		2.11286	3.14124	3.5684	3.67468	2.24963	2.033	2.03457	2.35944	1.87893	1.50002	0.99195	1.67658	2.17072	2.57009	-0.131612	0.440522	0.624467	0.666809	-0.0411221	-0.187203	-0.186087	0.0276338	-0.300897	-0.625823	-1.22247	-0.465287	-0.0926352	0.15101	0	0	0	0	0	0
Synpcc7942_0865	637799281		nucleotide-binding protein	chromosome	+	867986	868477	0	0.205372	140.432	0		0.44809	1.32713	1.47146	1.26357	0.382756	0.423776	0.535214	0.874574	0.366812	0.302457	0.302182	0.560146	1.00532	0.807613	-0.423667	1.14278	1.29172	1.07198	-0.651032	-0.504154	-0.167338	0.541125	-0.712415	-0.990727	-0.992036	-0.101652	0.742131	0.426209	0	0	0	0	0	0
Synpcc7942_0866	637799282		hypothetical protein	chromosome	+	868540	869121	0	0.372312	216.345	0		0.53868	0.747933	0.798234	0.69695	0.307987	0.269587	0.327323	0.534579	0.34336	0.442032	0.38318	0.626337	0.664709	0.529275	-0.0980325	0.375449	0.469352	0.273595	-0.904589	-1.09671	-0.816745	-0.109058	-0.74774	-0.383311	-0.589439	0.119478	0.205263	-0.123442	0	0	0	0	0	0
Synpcc7942_0867	637799283		hypothetical protein	chromosome	+	869169	869504	0	0.28389	106.87	0		0.43245	1.22338	1.35385	1.10154	0.284383	0.282059	0.457031	0.563283	0.276627	0.297757	0.242423	0.67153	0.64575	0.677991	-0.248357	1.25191	1.39811	1.10056	-0.853054	-0.864896	-0.168598	0.132969	-0.892949	-0.786754	-1.08336	0.386561	0.330085	0.400376	0	0	0	0	0	0
Synpcc7942_0868	637799284		hypothetical protein	chromosome	+	869505	871253	1	0.170133	125.975	0		0.259465	0.780857	0.802952	0.600785	0.15672	0.166773	0.2281	0.290107	0.117357	0.106713	0.130673	0.35375	0.399362	0.294084	-0.278304	1.31121	1.35147	0.933004	-1.00565	-0.915958	-0.464181	-0.117258	-1.42294	-1.56011	-1.26789	0.168887	0.343854	-0.0976181	0	0	0	0	0	0
Synpcc7942_0869	637799285		hypothetical protein	chromosome	+	871262	871852	0	0.0703606	301.453	0		0.190148	0.393579	0.332446	0.319747	0.118015	0.103342	0.169652	0.168789	0.117953	0.123762	0.123105	0.227584	0.223397	0.174547	0.0159029	1.06544	0.821899	0.765712	-0.672255	-0.863794	-0.148643	-0.156002	-0.673012	-0.603653	-0.611327	0.275179	0.248391	-0.107608	0	0	0	0	0	0
Synpcc7942_0870	637799286		hypothetical protein	chromosome	-	871886	872113	0	0.169698	256.888	0		0.536835	0.538376	0.496665	0.424967	0.648521	0.669683	0.562424	0.394948	0.550342	0.719043	0.617393	0.416557	0.483267	0.465011	0.263113	0.267248	0.150906	-0.0740134	0.535787	0.582112	0.330292	-0.179701	0.298963	0.684712	0.464823	-0.102853	0.111455	0.0558988	0	0	1	69	0	0
Synpcc7942_0871	637799287		hypothetical protein	chromosome	-	872106	872330	0	0.126762	248.894	0		0.41038	0.49054	0.316167	0.331668	0.421579	0.477368	0.375258	0.313941	0.475061	0.564221	0.393651	0.326953	0.319283	0.345979	0.273637	0.531046	-0.102637	-0.0335847	0.312479	0.491778	0.144557	-0.112833	0.484787	0.732935	0.213594	-0.0542427	-0.0884907	0.0273604	0	0	0	0	0	0
Synpcc7942_0872	637799288		hypothetical protein	chromosome	+	872362	872940	0	0.0485245	78.1852	0		0.0284334	0.0427569	0.0367753	0.0332611	0.0325243	0.0381924	0.035545	0.029801	0.021404	0.0130683	0.03278	0.0303413	0.0326951	0.0313437	-0.139728	0.448842	0.231423	0.0865195	0.0542041	0.285971	0.182332	-0.0719557	-0.549437	-1.26124	0.0655018	-0.0460313	0.0617588	0.000860303	0	0	0	0	0	0
Synpcc7942_0873	637799289		hypothetical protein	chromosome	-	873108	874196	0	0.15579	208.834	0		0.308922	0.329155	0.20086	0.247027	0.284366	0.368411	0.251012	0.335707	0.332156	0.502583	0.315165	0.323646	0.402045	0.295581	0.605337	0.696859	-0.0157201	0.28276	0.485842	0.85941	0.305848	0.725296	0.709951	1.30745	0.6342	0.672508	0.98545	0.541647	0	0	0	0	0	0
Synpcc7942_0874	637799290		DEAD/DEAH box helicase-like	chromosome	-	874390	877449	0	0.104659	101.608	0		0.194851	0.218943	0.200847	0.204736	0.162742	0.163459	0.17366	0.171807	0.154152	0.125834	0.155579	0.180484	0.170206	0.177921	-0.0137353	0.154447	0.0299859	0.0576558	-0.273521	-0.267181	-0.17984	-0.195315	-0.351757	-0.644583	-0.338459	-0.124235	-0.208827	-0.144867	0	0	0	0	0	0
Synpcc7942_0875	637799291		hypothetical protein	chromosome	-	877453	877887	0	0.126439	144.151	0		0.544651	0.512198	0.48393	0.506357	0.429703	0.440573	0.471903	0.45616	0.471856	0.351752	0.363594	0.307938	0.367116	0.429272	0.0454053	-0.0432251	-0.125129	-0.0597728	-0.296586	-0.260544	-0.161436	-0.210386	-0.161581	-0.585367	-0.537597	-0.777286	-0.523692	-0.298035	0	0	0	0	0	0
Synpcc7942_0876	637799292	alaS	alanyl-tRNA synthetase	chromosome	+	877976	880675	0	0.0696885	212.702	0		0.399511	0.487675	0.650975	0.631908	0.480476	0.485559	0.471222	0.48509	0.423424	0.31356	0.391894	0.324106	0.470475	0.514193	-0.323621	-0.0359377	0.380745	0.337857	-0.0573916	-0.0422119	-0.0854495	-0.0436041	-0.239755	-0.673116	-0.351393	-0.625391	-0.0877404	0.040453	0	0	0	0	0	0
Synpcc7942_0877	637799293	rps12	Elongator protein 3/MiaB/NifB	chromosome	+	880867	883485	0	0.131753	109.993	0		0.301726	0.391099	0.438844	0.403509	0.278028	0.299139	0.341931	0.281856	0.226245	0.246215	0.266022	0.278791	0.355105	0.335162	-0.131864	0.242431	0.408604	0.287498	-0.249876	-0.144287	0.0486015	-0.230148	-0.54722	-0.425185	-0.313561	-0.24592	0.103139	0.0197548	0	0	0	0	0	0
Synpcc7942_0878	637799294	rne	ribonuclease, Rne/Rng family	chromosome	+	883835	886261	1	0.198359	8.29309	1	Dusk	0.850265	2.36095	1.83004	1.26761	0.377327	0.645608	0.821891	0.65474	0.407224	0.399059	0.540897	0.813416	1.01739	0.890221	-0.0964577	1.37693	1.00943	0.479669	-1.26856	-0.493711	-0.145423	-0.473447	-1.15855	-1.18777	-0.749016	-0.160377	0.162433	-0.030207	0	0	0	0	1	159
Synpcc7942_0879	637799295	rhnB, rnhB	RNase HII	chromosome	+	886245	886892	0	0.102507	265.979	0		0.419747	1.67461	1.27629	0.790349	0.149611	0.329881	0.370535	0.313708	0.155389	0.147906	0.195264	0.520183	0.626221	0.432621	-0.130806	1.86543	1.47356	0.782163	-1.61911	-0.478382	-0.310719	-0.550906	-1.56444	-1.63565	-1.2349	0.178692	0.446344	-0.0872219	0	0	0	0	0	0
Synpcc7942_0880	637799296		hypothetical protein	chromosome	-	886915	887472	1	0.142114	220.165	0		0.342497	0.335518	0.335629	0.36562	0.368732	0.305715	0.27993	0.34208	0.315097	0.213948	0.270692	0.297123	0.251397	0.362035	-0.274389	-0.30409	-0.303614	-0.180134	-0.167907	-0.438292	-0.565412	-0.276145	-0.394684	-0.953217	-0.613827	-0.479422	-0.720513	-0.194348	0	0	0	0	0	0
Synpcc7942_0881	637799297	pheA	prephenate dehydratase	chromosome	+	887552	888427	0	0.19775	132.912	0		0.26474	0.247868	0.335326	0.359304	0.224527	0.192332	0.218673	0.294843	0.213091	0.161235	0.107428	0.156675	0.195045	0.279133	-0.172802	-0.267806	0.168182	0.267825	-0.410494	-0.633781	-0.448607	-0.017436	-0.48591	-0.888214	-1.47401	-0.929609	-0.613574	-0.0964294	0	0	0	0	0	0
Synpcc7942_0882	637799298	lon	Peptidase S16, lon-like	chromosome	-	888440	889096	1	0.0763444	61.5228	0		0.636249	2.03162	2.42259	1.99873	0.51381	0.474419	0.709231	0.654932	0.258185	0.301996	0.367122	0.618343	0.727725	0.959519	-0.135225	1.53974	1.79366	1.51619	-0.44358	-0.558654	0.0214392	-0.0934709	-1.43641	-1.21029	-0.928555	-0.17641	0.0585763	0.457495	0	0	1	70	0	0
Synpcc7942_0883	637799299	rpsJ, rps10	30S ribosomal protein S10	chromosome	-	889306	889623	0	0.149571	312.509	0		12.9448	31.3848	52.2766	49.8638	24.0165	14.9741	15.6487	21.5583	10.4541	9.09994	8.02257	9.40876	14.0154	18.0639	-0.194673	1.08302	1.81912	1.75095	0.69698	0.0154181	0.0789914	0.541194	-0.502983	-0.703118	-0.88491	-0.654971	-0.0800311	0.286062	0	0	0	0	0	0
Synpcc7942_0884	637799300	EF-Tu, tufA, tuf	elongation factor Tu	chromosome	-	889697	890926	0	0.153823	310.957	0		16.9372	33.9903	56.6729	57.5464	32.8206	21.6365	19.3385	29.1932	20.0963	13.1919	11.4591	12.45	17.8713	23.0473	-0.229855	0.775073	1.51261	1.53468	0.724549	0.123418	-0.0385749	0.555583	0.0168749	-0.5904	-0.793553	-0.673909	-0.15241	0.214543	0	0	0	0	0	0
Synpcc7942_0885	637799301	fus, fusA	elongation factor G	chromosome	-	890953	893037	0	0.207317	22.5666	0		7.41699	19.6299	28.0115	26.0938	11.3919	8.34536	7.86169	12.6289	7.18981	4.54557	4.20556	5.50805	9.51097	10.3959	-0.247152	1.15699	1.66996	1.56765	0.371956	-0.0770112	-0.163147	0.520673	-0.292033	-0.953525	-1.06569	-0.676445	0.111607	0.239953	0	0	1	71	0	0
Synpcc7942_0886	637799302	rps7, rpsG	30S ribosomal protein S7	chromosome	-	893112	893582	0	0.200544	116.116	0		4.96183	14.0666	19.2966	16.4535	5.67006	4.94092	5.44848	8.25989	3.27418	2.87204	2.7687	3.39067	6.52348	6.62932	-0.326332	1.177	1.63307	1.40312	-0.133841	-0.332426	-0.191349	0.408918	-0.926069	-1.11513	-1.16799	-0.875634	0.0684366	0.0916567	0	0	0	0	0	0
Synpcc7942_0887	637799303	rps12, rpsL	30S ribosomal protein S12	chromosome	-	893750	894124	0	0.364651	124.85	0		5.00092	12.4125	18.0861	15.2749	5.84569	4.99271	5.61057	7.74882	4.23217	2.97281	2.91443	3.37591	6.06033	6.64662	-0.412568	0.898962	1.44205	1.19833	-0.187386	-0.414936	-0.246611	0.219217	-0.653362	-1.16293	-1.19155	-0.979483	-0.135363	-0.00213831	0	0	0	0	1	161
Synpcc7942_0888	637799304		mannose-1-phosphate guanylyltransferase-like	chromosome	-	894280	894639	0	0.0682186	271.735	0		0.234617	0.177649	0.135769	0.203949	0.20149	0.269105	0.224275	0.242645	0.238821	0.226529	0.257016	0.23942	0.25753	0.210931	0.423192	0.0219152	-0.365958	0.221096	0.203596	0.621054	0.358157	0.471734	0.448818	0.372583	0.554743	0.452429	0.557625	0.269655	0	0	0	0	0	0
Synpcc7942_0889	637799305		hypothetical protein	chromosome	-	894636	896453	0	0.142892	38.0967	0		0.262216	0.190926	0.173022	0.208219	0.31267	0.319728	0.266466	0.289477	0.400911	0.354696	0.394104	0.314354	0.250975	0.243518	-0.018033	-0.475779	-0.617834	-0.350686	0.235851	0.268056	0.00515858	0.12466	0.594492	0.417792	0.569785	0.243602	-0.081248	-0.124763	0	0	0	0	0	0
Synpcc7942_0890	637799307	glsF, gltS	glutamate synthase (ferredoxin)	chromosome	+	896748	901358	0	0.0655538	250.745	0		1.66162	2.08259	2.01244	2.14845	1.81181	1.93316	1.64378	1.92788	2.2259	1.70187	1.77338	1.33705	1.95643	1.74905	-0.155903	0.169892	0.120455	0.214808	-0.0310595	0.062472	-0.171476	0.0585225	0.265901	-0.121365	-0.0619877	-0.469437	0.0797321	-0.0819173	0	0	0	0	1	162
Synpcc7942_0891	637799308		hypothetical protein	chromosome	+	901736	902035	0	0.361855	44.4761	0		0.51059	0.467618	0.240352	0.228691	0.190641	0.709033	0.460864	0.422382	0.52928	0.512843	0.329507	1.29195	0.436856	0.405942	0.830855	0.70402	-0.256162	-0.327912	-0.590453	1.30454	0.683031	0.557239	0.882721	0.837209	0.199002	2.17017	0.60585	0.499964	1	40	1	72	0	0
Synpcc7942_0892	637799309	cofG	FO synthase subunit 1	chromosome	-	902109	903119	0	0.110597	134.223	0		0.089207	0.0800925	0.0732356	0.0714323	0.0476015	0.0677015	0.0469768	0.0624013	0.0459677	0.0540527	0.0555371	0.0754791	0.0561734	0.0392077	0.357266	0.201776	0.072655	0.036686	-0.548883	-0.0407031	-0.567941	-0.158315	-0.599271	-0.365525	-0.326438	0.116186	-0.310003	-0.828752	0	0	0	0	0	0
Synpcc7942_0893	637799310	psbAIII, psbA, psbA3, psbAII	photosystem q(b) protein	chromosome	+	903201	904283	0	0.15553	36.5359	0		0.0118966	0.0914358	0.108583	0.0644606	0.00837217	0.00680621	0.00243632	0.0313668	0.0171647	0.00543406	0.00292084	0.0162213	0.0174796	0.0211669	0.325629	3.26784	3.5158	2.76349	-0.18125	-0.479998	-1.96215	1.72432	0.854519	-0.80482	-1.70047	0.772962	0.880753	1.15689	0	0	0	0	0	0
Synpcc7942_0894	637799311	aroK	shikimate kinase	chromosome	-	904845	905417	0	0.190064	129.337	0		0.132413	0.205222	0.292216	0.312987	0.169193	0.169071	0.174981	0.216437	0.105437	0.0689601	0.0731472	0.166708	0.151633	0.215869	-0.479876	0.152263	0.662113	0.761182	-0.126249	-0.127291	-0.077721	0.229028	-0.808541	-1.42109	-1.33605	-0.147594	-0.284334	0.225235	0	0	0	0	0	0
Synpcc7942_0895	637799312		hypothetical protein	chromosome	-	905485	906657	0	0.0777655	47.3607	0		0.0909217	0.109043	0.121292	0.161613	0.123677	0.10593	0.130914	0.125034	0.112915	0.0781238	0.0937116	0.0898599	0.100555	0.1311	-0.351729	-0.0895322	0.0640554	0.478119	0.0921482	-0.131312	0.174197	0.107899	-0.0391928	-0.570593	-0.308128	-0.368677	-0.206439	0.176242	0	0	0	0	0	0
Synpcc7942_0896	637799313	minD	septum site-determining protein MinD	chromosome	+	906832	907638	0	0.0889942	37.861	0		1.04484	1.09989	1.28028	1.35502	0.955882	1.05432	1.19535	1.09312	0.835023	0.753216	0.93487	1.22111	1.0965	1.17294	-0.382816	-0.308739	-0.0896387	-0.00778806	-0.511198	-0.369786	-0.18867	-0.317649	-0.706216	-0.854967	-0.543266	-0.157913	-0.313195	-0.215976	0	0	0	0	0	0
Synpcc7942_0897	637799314	minE	cell division topological specificity factor MinE	chromosome	+	907653	907928	0	0.127616	347.937	0		0.702813	0.781107	0.813563	0.863477	0.636817	0.557032	0.778176	0.679875	0.429373	0.420363	0.56446	0.751875	0.874065	0.82365	-0.281082	-0.128703	-0.0699691	0.0159348	-0.423345	-0.616464	-0.134127	-0.328954	-0.991991	-1.02259	-0.59735	-0.18373	0.0335172	-0.0521908	0	0	0	0	0	0
Synpcc7942_0898	637799315		ferredoxin like protein	chromosome	+	907925	908317	0	0.143627	284.816	0		0.568253	0.639116	0.694494	0.718199	0.452554	0.471581	0.574703	0.544699	0.27001	0.323027	0.390378	0.677504	0.726241	0.676874	-0.100301	0.0692445	0.189129	0.237551	-0.428743	-0.369328	-0.0840164	-0.161374	-1.17382	-0.915177	-0.641961	0.153397	0.253616	0.152053	0	0	0	0	0	0
Synpcc7942_0899	637799316		hypothetical protein	chromosome	-	908498	909295	0	0.0645667	130.461	0		0.107636	0.103409	0.137053	0.106336	0.098764	0.110844	0.121677	0.0925713	0.103856	0.112729	0.061442	0.0708593	0.0754249	0.10174	-0.158191	-0.215984	0.190379	-0.175721	-0.282296	-0.115821	0.0187	-0.375715	-0.209762	-0.0914936	-0.967056	-0.761322	-0.671239	-0.239468	0	0	0	0	0	0
Synpcc7942_0900	637799317	gifA	hypothetical protein	chromosome	-	909440	909643	0	0.327067	135.684	0		0.747358	0.131467	0.317875	0.531015	2.39326	5.3993	0.372499	0.523352	7.98476	5.50181	4.22545	0.325625	0.93986	0.538447	0.356567	-2.15053	-0.876773	-0.13648	2.03567	3.20947	-0.647998	-0.157452	3.77394	3.2366	2.8558	-0.842021	0.687212	-0.11643	0	0	1	74	0	0
Synpcc7942_0901	637799318		Haloalkane dehalogenase	chromosome	+	909780	910676	1	0.305713	138.029	0		0.115706	0.0442733	0.0663582	0.137539	0.157066	0.144394	0.0876569	0.171922	0.12607	0.0834166	0.056424	0.0624267	0.0827933	0.0697467	-0.40654	-1.79249	-1.20865	-0.15716	0.0343685	-0.0869919	-0.807061	0.164756	-0.282772	-0.878595	-1.44262	-1.29677	-0.889415	-1.1368	0	0	0	0	0	0
Synpcc7942_0902	637799319		hypothetical protein	chromosome	-	910735	911694	0	0.145687	295.996	0		0.0857445	0.106374	0.0801508	0.0720927	0.067567	0.0712981	0.0654136	0.0836901	0.0718077	0.0840727	0.0856719	0.127525	0.096068	0.0746217	0.00197128	0.313007	-0.0953547	-0.248219	-0.341753	-0.264208	-0.388481	-0.0330161	-0.253933	-0.0264354	0.00075015	0.57464	0.165983	-0.198477	0	0	0	0	0	0
Synpcc7942_0903	637799320	acnB	bifunctional aconitate hydratase 2/2-methylisocitrate dehydratase	chromosome	-	911756	914341	0	0.163795	148.196	0		0.767263	0.885519	0.948023	0.981851	0.866033	1.0518	0.856248	1.39515	1.26037	1.02636	0.917116	1.27375	1.15774	1.05211	-0.225445	-0.0186431	0.0797559	0.130338	-0.0507431	0.229618	-0.067138	0.637184	0.490615	0.194303	0.0319385	0.505849	0.368077	0.230053	0	0	0	0	0	0
Synpcc7942_0904	637799321		hypothetical protein	chromosome	+	914613	915158	0	0.137554	251.447	0		1.09464	0.871871	0.784391	0.678973	1.14967	1.32495	1.27191	0.90066	1.60869	1.88779	2.30003	1.06882	1.16815	1.17558	0.240574	-0.0877018	-0.240243	-0.448462	0.31133	0.516051	0.457105	-0.0408339	0.796	1.02681	1.31177	0.206126	0.334338	0.343482	0	0	0	0	0	0
Synpcc7942_0905	637799322		hypothetical protein	chromosome	+	915588	916130	1	1.69012	203.285	1	Dusk	10.622	2.36886	2.49094	3.47569	70.7536	76.9576	19.9343	19.4056	214.063	242.499	140.582	16.1623	11.8971	14.7293	-0.801103	-2.96589	-2.8934	-2.41279	1.93464	2.0559	0.107091	0.0683154	3.5318	3.71175	2.92518	-0.195529	-0.637548	-0.329472	1	41	1	75	0	0
Synpcc7942_0906	637799323		hypothetical protein	chromosome	+	916262	916747	0	1.08166	211.173	0		0.490442	0.326857	0.402279	0.377684	1.89148	1.48636	0.613486	0.824349	4.30149	4.37662	2.89966	0.548988	0.653187	0.686888	-0.134034	-0.719456	-0.41992	-0.510938	1.81333	1.4656	0.188914	0.61514	2.99865	3.02363	2.4297	0.0286585	0.279381	0.351959	0	0	0	0	0	0
Synpcc7942_0907	637799324		hypothetical protein	chromosome	+	916954	917166	0	0.296626	178.796	0		0.117616	0.15739	0.147678	0.189304	0.3209	0.257075	0.17838	0.220241	0.585462	0.785468	0.49751	0.177841	0.21877	0.282511	-0.287272	0.132982	0.0410938	0.399344	1.16076	0.840828	0.313589	0.617723	2.02821	2.45219	1.79336	0.309228	0.608054	0.976948	0	0	0	0	0	0
Synpcc7942_0908	637799325		hypothetical protein	chromosome	+	917280	917987	1	0.440143	193.556	0		0.322505	0.251321	0.263837	0.272008	0.306373	0.273666	0.226586	0.423448	0.42338	0.54861	0.366368	0.527277	0.296174	0.261049	-0.00525337	-0.365044	-0.294928	-0.250928	-0.0792887	-0.242161	-0.514519	0.387609	0.387376	0.761204	0.178715	0.703984	-0.128132	-0.310254	0	0	0	0	0	0
Synpcc7942_0909	637799326	ycf57, iscA	HesB/YadR/YfhF	chromosome	+	918135	918491	0	0.0627144	170.253	0		1.85862	1.59783	1.71883	1.70768	2.05528	1.96151	1.56538	1.962	2.47988	2.39972	2.30821	1.77921	1.82058	1.99058	0.0954431	-0.122677	-0.0173623	-0.0267546	0.240543	0.173171	-0.152276	0.173537	0.51148	0.464077	0.407986	0.0324493	0.0656042	0.194399	0	0	0	0	0	0
Synpcc7942_0910	637799327		hypothetical protein	chromosome	+	918560	918988	0	0.144351	72.5258	0		1.92209	1.98007	2.1162	2.41288	2.00786	2.02504	1.65323	2.38937	2.41214	1.98521	1.92266	1.75574	2.04681	2.1864	-0.162356	-0.119487	-0.0235557	0.165721	-0.0993791	-0.0870875	-0.379744	0.151596	0.165276	-0.115742	-0.161928	-0.292958	-0.0716578	0.023521	0	0	0	0	0	0
Synpcc7942_0911	637799328		hypothetical protein	chromosome	+	918998	919249	0	0.13697	219.494	0		1.0197	1.23822	1.54012	1.6144	1.12369	0.89423	0.980026	1.38012	1.01123	0.834054	0.856719	1.0849	1.31173	1.35883	-0.239884	0.0402365	0.355015	0.422965	-0.0997819	-0.429314	-0.29714	0.196765	-0.251928	-0.529819	-0.491138	-0.150464	0.123433	0.174328	0	0	0	0	0	0
Synpcc7942_0912	637799329	dnaX	DNA polymerase III, tau subunit	chromosome	+	919325	921283	0	0.0686585	202.732	0		0.118383	0.140062	0.162545	0.131177	0.0890079	0.0951426	0.0985914	0.129642	0.111893	0.123169	0.120702	0.156093	0.160312	0.145785	0.000209508	0.242811	0.457584	0.148261	-0.41125	-0.315092	-0.263721	0.131277	-0.0811296	0.0573873	0.0281904	0.399152	0.437628	0.300584	0	0	0	0	0	0
Synpcc7942_0913	637799330		N-acetyltransferase-like	chromosome	-	921286	921780	0	0.0734163	210.522	0		0.0896532	0.190673	0.149578	0.122795	0.0577699	0.0914743	0.0895502	0.0871452	0.0234714	0.0475563	0.0639045	0.155269	0.202984	0.177524	0.0852197	1.17389	0.823692	0.539044	-0.548818	0.114231	0.0835604	0.0442857	-1.84823	-0.829501	-0.403219	0.877565	1.26416	1.07081	0	0	0	0	0	0
Synpcc7942_0914	637799331		tRNA-(MS(2)IO(6)A)-hydroxylase-like	chromosome	-	921780	922391	0	0.0508286	60.6437	0		0.328651	0.506485	0.497372	0.347127	0.279214	0.342403	0.380259	0.285465	0.170858	0.22804	0.27782	0.571414	0.616263	0.533764	0.103079	0.727043	0.70085	0.181986	-0.132103	0.16222	0.313507	-0.100163	-0.840679	-0.424187	-0.139326	0.90106	1.01007	0.802728	0	0	0	0	0	0
Synpcc7942_0915	637799332	aroQ	3-dehydroquinate dehydratase	chromosome	-	922388	922837	0	0.108905	286.146	0		3.35303	2.53064	2.43578	2.29359	3.0983	3.36264	3.39726	2.65531	3.45796	3.43764	3.25114	3.31711	3.11301	3.67417	0.334081	-0.0718844	-0.127002	-0.213776	0.220091	0.338209	0.352985	-0.00250199	0.378536	0.370033	0.28956	0.318541	0.226924	0.466034	0	0	0	0	0	0
Synpcc7942_0916	637799333		hypothetical protein	chromosome	-	922848	922976	0	0.204568	353.14	0		6.1202	4.01409	4.09652	3.7462	6.2015	5.52631	5.37115	4.20919	6.80288	7.45575	5.90355	5.33242	4.31589	5.12379	0.155043	-0.453461	-0.424135	-0.553108	0.174083	0.00778149	-0.0333028	-0.384991	0.307611	0.439819	0.103048	-0.0437443	-0.348877	-0.101323	0	0	0	0	1	165
Synpcc7942_0917	637799334		hypothetical protein	chromosome	-	923527	923793	0	0.296735	221.192	0		3.49579	1.50284	1.84691	2.47038	8.50281	5.86456	3.18007	3.39077	10.0112	7.86567	5.02332	1.54827	2.30881	2.52741	0.18844	-1.02949	-0.732069	-0.312447	1.47076	0.934844	0.05188	0.144433	1.70636	1.35839	0.711462	-0.986524	-0.410029	-0.27952	0	0	0	0	0	0
Synpcc7942_0918	637799335	aas, fadD	long-chain-fatty-acid CoA ligase	chromosome	+	924079	926028	1	0.199131	248.375	1	Dusk	1.07918	0.869113	1.13115	1.14932	1.28155	1.2593	0.969897	1.37402	1.17971	1.20677	0.936004	1.28351	1.17043	0.844947	0.18075	-0.131565	0.248615	0.271596	0.428708	0.403444	0.0267237	0.529223	0.309249	0.341966	-0.0245941	0.430909	0.297854	-0.172247	0	0	0	0	0	0
Synpcc7942_0919	637799336		hypothetical protein	chromosome	+	926077	926523	0	0.137463	59.9715	0		1.50202	1.96148	2.00934	2.07472	1.6321	1.89166	2.18874	1.42945	0.857729	0.934768	1.12519	1.89874	1.80368	1.82271	0.128602	0.513646	0.54842	0.594618	0.248431	0.461357	0.671803	0.0571634	-0.679705	-0.555619	-0.28813	0.466741	0.392641	0.407782	0	0	0	0	0	0
Synpcc7942_0920	637799337	psaK1, psaK2, psaK	photosystem I reaction center	chromosome	-	926720	926974	1	0.534883	142.086	1	Dawn	18.5429	3.01969	2.61512	5.17799	14.2803	13.2267	9.74084	10.6362	13.7871	8.77982	6.2335	3.17982	3.55196	5.17845	-0.0952013	-2.71359	-2.92112	-1.93561	-0.472046	-0.582611	-1.02395	-0.897086	-0.522751	-1.1738	-1.66795	-2.63905	-2.47938	-1.93548	0	0	1	77	0	0
Synpcc7942_0921	637799338		hypothetical protein	chromosome	-	927092	927394	1	0.0566653	241.979	0		0.158275	0.160003	0.186864	0.117186	0.174942	0.159864	0.191577	0.177957	0.189165	0.194227	0.247946	0.168501	0.156993	0.14816	-0.201768	-0.186099	0.0377887	-0.635405	-0.0573231	-0.187352	0.0737222	-0.0326668	0.0554489	0.0935468	0.445828	-0.11144	-0.213501	-0.297046	0	0	0	0	0	0
Synpcc7942_0922	637799339	gltX	Glutamate--tRNA ligase	chromosome	-	927391	928293	0	0.0634074	306.973	0		0.114937	0.14336	0.185426	0.194608	0.154477	0.0967891	0.126229	0.130772	0.081487	0.0567933	0.0893282	0.0930179	0.126321	0.163424	-0.104685	0.214119	0.585315	0.65504	0.321869	-0.352611	0.0305131	0.0815273	-0.600886	-1.12174	-0.468339	-0.409948	0.0315694	0.403092	0	0	0	0	0	0
Synpcc7942_0923	637799340	mtaP	5 -methylthioadenosine phosphorylase	chromosome	-	928293	929168	0	0.0721526	128.358	0		0.438783	0.574631	0.654078	0.797614	0.685523	0.574592	0.58614	0.563217	0.453592	0.378135	0.38909	0.436809	0.533603	0.599699	-0.292562	0.0965667	0.283394	0.569621	0.351136	0.0964697	0.125175	0.0676219	-0.244672	-0.507167	-0.465967	-0.299067	-0.0103018	0.15817	0	0	0	0	0	0
Synpcc7942_0924	637799341	nblS, hik33, chk33, ycf26, dspA, dfr	multi-sensor signal transduction histidine kinase	chromosome	-	929220	931214	0	0.158969	73.3659	0		0.268731	0.307126	0.303214	0.321572	0.321638	0.335699	0.322179	0.257578	0.370777	0.341348	0.35676	0.222897	0.269097	0.293489	-0.11627	0.0763966	0.0579015	0.142709	0.143005	0.204734	0.145426	-0.177425	0.348118	0.228807	0.292518	-0.386055	-0.11431	0.0108739	0	0	0	0	0	0
Synpcc7942_0925	637799343	purD	phosphoribosylamine--glycine ligase	chromosome	-	931278	932579	0	0.151645	127.706	0		0.340848	0.45594	0.605841	0.676235	0.432836	0.416517	0.386255	0.52513	0.354558	0.246665	0.282435	0.326779	0.452589	0.468042	-0.418682	0.00103531	0.411131	0.569717	-0.0739883	-0.129435	-0.238254	0.204867	-0.361785	-0.885257	-0.68989	-0.479495	-0.00960717	0.038829	0	0	0	0	0	0
Synpcc7942_0926	637799344		hypothetical protein	chromosome	+	932734	933993	1	0.221594	159.576	0		0.367547	0.332785	0.342975	0.350105	0.338216	0.31507	0.303222	0.453622	0.486249	0.44772	0.37658	0.413048	0.359809	0.334305	-0.151011	-0.294352	-0.250836	-0.221154	-0.270998	-0.373269	-0.428568	0.152549	0.252753	0.133657	-0.115985	0.0173686	-0.181708	-0.287776	0	0	0	0	0	0
Synpcc7942_0927	637799345	purC	phosphoribosylaminoimidazole-succinocarboxamide synthase	chromosome	+	934021	934746	0	0.198201	133.252	0		0.752259	1.05708	1.29781	1.23182	0.750304	0.76148	0.688344	0.832583	0.712676	0.591751	0.477105	0.691906	0.882538	0.862405	-0.0339076	0.456881	0.752871	0.677581	-0.0376616	-0.0163302	-0.162007	0.112458	-0.11189	-0.380146	-0.690831	-0.15456	0.196522	0.163228	0	0	0	0	0	0
Synpcc7942_0928	637799346		outer envelope membrane protein	chromosome	+	934864	937029	1	0.485795	137.855	1	Dawn	1.38695	1.75752	2.11602	2.06218	1.16244	1.25672	1.42281	2.12274	1.39499	1.14736	0.969719	2.00763	1.71009	1.53637	-0.191552	0.150075	0.417887	0.380707	-0.446305	-0.333803	-0.154723	0.422462	-0.183214	-0.465144	-0.707826	0.34203	0.110608	-0.0439434	0	0	0	0	0	0
Synpcc7942_0929	637799347	lpxC	UDP-3-O-3-hydroxymyristoyl N-acetylglucosamine deacetylase	chromosome	+	937039	937893	0	0.23004	150.628	0		0.768522	0.877085	1.09691	1.01077	0.589787	0.569	0.688796	0.862738	0.711142	0.529019	0.465241	0.798761	0.814103	0.67643	-0.169331	0.0212995	0.343952	0.225968	-0.551223	-0.602989	-0.327341	-0.00249487	-0.28128	-0.708098	-0.893438	-0.113652	-0.0862058	-0.353476	0	0	0	0	1	166
Synpcc7942_0930	637799348	fabZ, fabA	(3R)-hydroxymyristoyl-(acyl carrier protein) dehydratase	chromosome	+	937912	938379	0	0.145152	127.725	0		1.17155	1.60347	1.83542	1.87361	1.08197	1.01477	1.07233	1.34457	0.991365	0.689827	0.753642	1.14724	1.32758	1.23885	-0.0949384	0.357834	0.552745	0.582456	-0.209707	-0.302212	-0.222618	0.103784	-0.335874	-0.859056	-0.73141	-0.12519	0.0854356	-0.0143636	0	0	0	0	1	167
Synpcc7942_0931	637799349	lpxA	UDP-N-acetylglucosamine acyltransferase	chromosome	+	938386	939192	0	0.127313	208.537	0		0.550805	0.98869	1.10158	1.04703	0.528069	0.476272	0.585905	0.686208	0.406954	0.264615	0.342982	0.570757	0.850496	0.684707	-0.310404	0.533574	0.689564	0.616284	-0.371218	-0.520157	-0.221279	0.00670162	-0.74708	-1.36805	-0.993813	-0.259067	0.31636	0.00354278	0	0	0	0	0	0
Synpcc7942_0932	637799350	lpxB	lipid-A-disaccharide synthase	chromosome	+	939193	940392	1	0.104481	135.173	0		0.258277	0.559164	0.629915	0.541635	0.21912	0.237807	0.256377	0.306901	0.10392	0.102989	0.139052	0.301943	0.458295	0.355	-0.28465	0.829701	1.00159	0.783751	-0.521846	-0.403782	-0.295302	-0.0357977	-1.5981	-1.61108	-1.17795	-0.0592929	0.542705	0.174249	0	0	0	0	0	0
Synpcc7942_0933	637799351	narM	hypothetical protein	chromosome	-	940410	940925	1	0.141211	109.036	0		0.0915532	0.199905	0.217581	0.198273	0.0621772	0.0489776	0.0828376	0.126443	0.0540388	0.0700606	0.0613037	0.134055	0.08184	0.146235	-0.423421	0.70321	0.825447	0.691385	-0.981647	-1.32591	-0.567746	0.0423821	-1.18404	-0.80943	-1.00206	0.126723	-0.585225	0.252188	0	0	0	0	0	0
Synpcc7942_0934	637799352		hypothetical protein	chromosome	+	940995	942056	0	0.0726555	59.445	0		0.0694212	0.205428	0.131235	0.117303	0.0262699	0.0614757	0.0412426	0.0852989	0.0226094	0.0403739	0.0402111	0.276045	0.0973534	0.0813952	-0.100691	1.46449	0.818014	0.656105	-1.50266	-0.276052	-0.851933	0.19646	-1.71914	-0.882645	-0.888475	1.89076	0.387164	0.128877	0	0	0	0	0	0
Synpcc7942_0935	637799353		hypothetical protein	chromosome	-	942068	942838	1	0.110487	342.165	0		0.0844824	0.102348	0.0577452	0.0671288	0.07237	0.0682891	0.0561244	0.065041	0.121558	0.119948	0.127187	0.103959	0.0812141	0.0761896	0.0199551	0.296718	-0.528996	-0.311765	-0.203305	-0.28704	-0.570068	-0.357347	0.544876	0.525641	0.610186	0.319244	-0.0369658	-0.129102	0	0	0	0	0	0
Synpcc7942_0936	637799354		Rhodanese-like	chromosome	-	942843	943388	0	0.104138	237.043	0		0.104876	0.109574	0.0850865	0.0738494	0.0587609	0.104145	0.0860181	0.107645	0.124837	0.180156	0.120216	0.134733	0.0871224	0.11021	0.0213987	0.0846211	-0.280286	-0.484631	-0.814361	0.0113011	-0.264576	0.0589891	0.272755	0.801956	0.218339	0.382818	-0.246173	0.0929732	0	0	0	0	0	0
Synpcc7942_0937	637799355		hypothetical protein	chromosome	-	943435	944127	0	0.169205	229.816	0		0.131175	0.113124	0.0921771	0.0625265	0.132851	0.107885	0.0830014	0.136164	0.243655	0.252339	0.184866	0.144179	0.125376	0.123357	-0.0288613	-0.242449	-0.537871	-1.09781	-0.0105453	-0.310856	-0.689142	0.0249994	0.864491	0.915015	0.466133	0.107507	-0.0940837	-0.117507	0	0	0	0	0	0
Synpcc7942_0938	637799356		transcriptional regulator, ArsR family	chromosome	+	944220	944540	0	0.118188	265.481	0		0.0379073	0.0964028	0.0949768	0.0506201	0.0391102	0.0328043	0.0460305	0.0403148	0.0410201	0.0340481	0.0517357	0.0410458	0.0604855	0.0446335	-0.594522	0.752076	0.730577	-0.177288	-0.549453	-0.803113	-0.31441	-0.505688	-0.480669	-0.749424	-0.145838	-0.479763	0.0795901	-0.358871	0	0	0	0	0	0
Synpcc7942_0939	637799357	cysC	adenylylsulfate kinase	chromosome	+	944618	945244	0	0.211131	123.647	0		1.09022	1.52341	2.08854	2.07996	0.998922	0.89515	1.13873	1.37082	0.714024	0.502827	0.409913	0.985902	1.1922	1.26897	-0.177406	0.305275	0.760464	0.75453	-0.303585	-0.461828	-0.114597	0.153007	-0.787985	-1.2939	-1.58864	-0.322513	-0.0484019	0.0416324	0	0	0	0	0	0
Synpcc7942_0940	637799358		transcriptional regulator, XRE family	chromosome	-	945289	945639	0	0.239852	237.958	0		0.446598	0.268898	0.210944	0.226324	0.435171	0.498009	0.375859	0.337967	0.85179	1.19762	1.11075	0.491117	0.387211	0.28437	0.0509658	-0.680952	-1.03115	-0.929618	0.0135723	0.208161	-0.197817	-0.351127	0.982488	1.47408	1.36545	0.188058	-0.154892	-0.60024	0	0	0	0	0	0
Synpcc7942_0941	637799359		ATPase	chromosome	-	946064	947773	1	0.464084	174.971	1	Dawn	0.426119	0.528422	0.531473	0.474063	0.289999	0.250015	0.289158	0.402359	0.26815	0.234518	0.242332	0.372413	0.373272	0.320062	-0.254651	0.0557835	0.0640893	-0.10083	-0.809861	-1.02389	-0.814048	-0.337426	-0.922867	-1.11621	-1.06892	-0.449005	-0.44568	-0.667559	0	0	0	0	0	0
Synpcc7942_0942	637799360	ftsH	FtsH peptidase homologue, chloroplast. Metallo peptidase. MEROPS family M41	chromosome	-	947957	949849	0	0.157363	355.896	0		1.68263	3.9672	2.17321	1.80227	1.46015	1.91857	1.51398	1.62504	2.32448	2.85527	2.55627	1.67045	1.38029	1.32879	0.364144	1.60155	0.733252	0.463242	0.159538	0.55346	0.211776	0.313899	0.830336	1.12705	0.967463	0.353666	0.0783952	0.0235425	0	0	1	78	1	168
Synpcc7942_0943	637799361	argD	acetylornithine aminotransferase	chromosome	+	950237	951505	0	0.102518	134.5	0		0.926735	0.846586	1.36827	1.40756	1.37734	1.00157	0.809649	0.985792	1.10965	0.964616	0.814499	0.631617	0.70457	0.687202	-0.0667352	-0.197235	0.495393	0.536233	0.504925	0.045301	-0.261595	0.0223913	0.193137	-0.00893644	-0.252979	-0.619841	-0.462148	-0.498158	0	0	1	78	1	168
Synpcc7942_0944	637799362	folC	FolC bifunctional protein	chromosome	+	951502	952740	0	0.103194	101.252	0		0.165802	0.237272	0.41714	0.416755	0.234177	0.189526	0.129478	0.206284	0.134406	0.0895689	0.102123	0.123179	0.200583	0.174997	-0.0917264	0.425354	1.23934	1.23801	0.406413	0.10121	-0.448486	0.223444	-0.394588	-0.980118	-0.790876	-0.520434	0.183013	-0.0138622	0	0	0	0	0	0
Synpcc7942_0945	637799363		hypothetical protein	chromosome	-	952793	953767	0	0.160201	225.447	0		0.0601989	0.0677094	0.0451668	0.0413556	0.0436363	0.0302405	0.0400516	0.0768721	0.0889746	0.121582	0.104631	0.0799552	0.0980749	0.0798414	0.49935	0.668968	0.0848739	-0.0423032	0.0351421	-0.493904	-0.0885289	0.852073	1.06301	1.51347	1.29685	0.908804	1.2035	0.906749	0	0	0	0	0	0
Synpcc7942_0946	637799364	aoxA	UDP-galactopyranose mutase	chromosome	+	954141	955628	1	0.234372	172.13	0		0.125069	0.0384736	0.0562633	0.072396	0.195459	0.130212	0.100009	0.223947	0.702201	0.502854	0.289116	0.109945	0.127547	0.115222	-0.285593	-1.98638	-1.43805	-1.07434	0.358549	-0.227456	-0.60819	0.554836	2.20357	1.72182	0.923331	-0.471534	-0.257289	-0.403898	0	0	0	0	0	0
Synpcc7942_0947	637799366	ggtA	ATPase	chromosome	-	955647	956714	1	0.160073	323.05	0		0.117956	0.111071	0.107389	0.0890329	0.111673	0.150854	0.142303	0.0822953	0.10661	0.141696	0.173269	0.174257	0.119531	0.137282	-0.113929	-0.200701	-0.249337	-0.519771	-0.192902	0.24097	0.156784	-0.633299	-0.259836	0.150613	0.440833	0.449039	-0.0947956	0.104956	0	0	0	0	0	0
Synpcc7942_0948	637799367		permease protein of sugar ABC transporter	chromosome	-	956719	957546	1	0.164285	27.747	0		0.125348	0.098417	0.079486	0.0792247	0.0715997	0.136078	0.152958	0.0787978	0.0551918	0.107629	0.15568	0.163105	0.11959	0.128623	0.0711393	-0.27782	-0.586026	-0.590776	-0.736772	0.18964	0.35834	-0.598572	-1.11227	-0.148728	0.383788	0.451003	0.00330196	0.108353	0	0	0	0	0	0
Synpcc7942_0949	637799368		permease protein of sugar ABC transporter	chromosome	-	957546	958424	0	0.129873	249.244	0		0.171005	0.130846	0.140389	0.103384	0.122195	0.156935	0.256349	0.123301	0.123365	0.160685	0.241114	0.276055	0.185544	0.161366	-0.170579	-0.556755	-0.45519	-0.896611	-0.655432	-0.294459	0.413487	-0.642439	-0.641689	-0.260387	0.325093	0.520336	-0.052861	-0.254283	0	0	0	0	0	0
Synpcc7942_0950	637799369		putative multiple sugar transport system substrate-binding protein	chromosome	-	958421	959737	1	0.251107	359.755	0		0.279899	0.191499	0.187031	0.148969	0.203361	0.279845	0.39027	0.155581	0.209959	0.26556	0.386102	0.416847	0.251359	0.270157	0.128848	-0.418721	-0.452778	-0.781043	-0.332012	0.128573	0.608417	-0.718391	-0.285948	0.0529798	0.592923	0.703462	-0.0263064	0.0777385	0	0	0	0	0	0
Synpcc7942_0951	637799370	nadC	nicotinate-nucleotide pyrophosphorylase	chromosome	+	959837	960685	0	0.100027	92.5854	0		0.400466	0.515147	0.600209	0.662779	0.5422	0.496122	0.491034	0.451565	0.475316	0.323813	0.346507	0.301329	0.43051	0.521455	-0.367163	-0.00385629	0.216625	0.359686	0.0699825	-0.058147	-0.0730178	-0.193906	-0.119954	-0.673679	-0.575958	-0.777502	-0.262794	0.013702	0	0	0	0	0	0
Synpcc7942_0952	637799371		hypothetical protein	chromosome	-	960829	961620	0	0.262137	303.195	0		0.471764	0.163453	0.126482	0.125379	0.404213	0.382916	0.211882	0.366282	1.19411	1.27914	0.805795	0.434615	0.256181	0.209845	0.814217	-0.714976	-1.08492	-1.09756	0.591268	0.513179	-0.340586	0.449108	2.15401	2.25325	1.58657	0.695891	-0.0666832	-0.354523	0	0	0	0	0	0
Synpcc7942_0953	637799372		hypothetical protein	chromosome	-	961744	962208	0	0.175973	51.6686	0		0.250908	0.318326	0.289317	0.262729	0.20099	0.210604	0.196329	0.37107	0.298162	0.357987	0.234694	0.289252	0.277667	0.216708	0.0690698	0.412418	0.274564	0.135487	-0.250963	-0.183556	-0.284811	0.633604	0.31801	0.581819	-0.0273047	0.274238	0.215271	-0.142336	0	0	0	0	0	0
Synpcc7942_0954	637799373		glycine cleavage T-protein-like	chromosome	-	962266	963300	0	0.0900376	130.037	0		0.313283	0.352308	0.359557	0.358183	0.310659	0.34185	0.377807	0.364163	0.312816	0.232317	0.294169	0.291733	0.33157	0.346533	-0.332837	-0.163469	-0.134084	-0.139609	-0.344975	-0.206944	-0.0626553	-0.115722	-0.334993	-0.764212	-0.423661	-0.435658	-0.250992	-0.187313	0	0	0	0	0	0
Synpcc7942_0955	637799374		hypothetical protein	chromosome	-	963272	963790	0	0.0641976	300.145	0		0.427537	0.38458	0.38789	0.373382	0.49723	0.422019	0.405693	0.338695	0.47906	0.448712	0.358077	0.324739	0.329209	0.417766	0.060422	-0.0923431	-0.0799816	-0.134976	0.278286	0.0416804	-0.0152379	-0.27564	0.22458	0.130161	-0.195356	-0.336349	-0.316624	0.0270688	0	0	0	0	0	0
Synpcc7942_0956	637799375		hypothetical protein	chromosome	+	963926	965068	0	0.131553	109.025	0		1.2249	1.39294	1.38616	1.34632	1.0819	1.2815	1.29964	1.22136	1.29228	1.25116	1.32356	1.06532	1.43411	1.45196	0.0026475	0.188116	0.181077	0.139003	-0.17646	0.0678066	0.0880956	-0.00152972	0.0798987	0.0332452	0.114407	-0.198741	0.23013	0.247977	0	0	0	0	0	0
Synpcc7942_0957	637799376	cobO	cob(I)yrinic acid a,c-diamide adenosyltransferase	chromosome	+	965072	965719	0	0.0988515	179.606	0		0.861587	0.968632	0.996238	1.00024	0.745901	0.747513	0.89987	0.87289	0.749454	0.670765	0.835972	0.802302	0.990268	0.951472	-0.145846	0.023107	0.0636481	0.069436	-0.353858	-0.350743	-0.0831257	-0.127043	-0.347002	-0.507035	-0.189387	-0.248697	0.054977	-0.00267997	0	0	0	0	0	0
Synpcc7942_0958	637799377	purN	phosphoribosylglycinamide formyltransferase	chromosome	-	965726	966355	0	0.11154	262.53	0		0.155654	0.23168	0.221225	0.169082	0.142814	0.207261	0.254639	0.130095	0.122945	0.160138	0.296243	0.17341	0.209568	0.17208	-0.194239	0.379556	0.312935	-0.0748565	-0.318438	0.218868	0.515876	-0.45301	-0.534563	-0.15326	0.734201	-0.0383883	0.234838	-0.0495003	0	0	0	0	0	0
Synpcc7942_0959	637799378	obgE	GTPase ObgE	chromosome	-	966530	967561	0	0.138577	151.49	0		0.216399	0.381319	0.385456	0.347561	0.210862	0.175503	0.196867	0.235644	0.305469	0.298979	0.307285	0.209062	0.280796	0.279976	-0.285448	0.531859	0.547426	0.398128	-0.322841	-0.587642	-0.421916	-0.162532	0.211888	0.180907	0.220438	-0.335206	0.0903835	0.0861639	0	0	0	0	0	0
Synpcc7942_0960	637799379		ATPase	chromosome	+	967595	968848	0	0.146338	324.384	0		0.20035	0.226208	0.253156	0.258196	0.144054	0.145273	0.171273	0.243376	0.16677	0.135428	0.131172	0.281061	0.171089	0.170618	-0.140144	0.0349861	0.197362	0.225801	-0.616056	-0.6039	-0.366367	0.140521	-0.404803	-0.705139	-0.751202	0.348217	-0.367922	-0.371894	0	0	0	0	0	0
Synpcc7942_0961	637799380		cell envelope-related function transcriptional attenuator common domain	chromosome	+	968937	969950	1	0.210626	228.92	0		0.153886	0.247196	0.345528	0.328803	0.185716	0.147464	0.138432	0.211111	0.170341	0.167482	0.103727	0.232806	0.217327	0.150715	-0.352453	0.331345	0.81449	0.742914	-0.0812151	-0.413947	-0.505135	0.103692	-0.205885	-0.230305	-0.921526	0.244814	0.145558	-0.382486	0	0	0	0	0	0
Synpcc7942_0962	637799381	sun	sun protein	chromosome	-	969968	971323	0	0.0821491	348.994	0		0.148857	0.256736	0.243392	0.17087	0.11933	0.163855	0.184075	0.134405	0.0845385	0.0911407	0.117223	0.161943	0.217641	0.182086	-0.152597	0.633765	0.55676	0.0463755	-0.471561	-0.0141063	0.153767	-0.299935	-0.968843	-0.860355	-0.497268	-0.0310338	0.395425	0.138095	0	0	0	0	0	0
Synpcc7942_0963	637799382		probable methyltransferase	chromosome	-	971259	971639	1	0.157086	25.3423	1	Dusk	0.914921	0.80409	0.804009	0.755036	0.842085	1.0392	0.965384	0.547703	0.80505	1.00402	1.28689	0.706047	0.780965	0.852371	-0.18806	-0.37435	-0.374495	-0.465162	-0.307742	-0.00430624	-0.110604	-0.928314	-0.372629	-0.0539945	0.304115	-0.561942	-0.416448	-0.290225	0	0	0	0	0	0
Synpcc7942_0964	637799383		hypothetical protein	chromosome	+	971856	972374	1	0.229548	176.525	1	Dawn	0.58476	0.433274	0.438241	0.452233	0.659838	0.643173	0.465683	0.793752	1.05662	1.15985	0.696346	0.790162	0.543382	0.642293	-0.129815	-0.562382	-0.545938	-0.500596	0.0444498	0.00754616	-0.458313	0.311027	0.723722	0.858201	0.122144	0.304487	-0.235695	0.00556996	0	0	0	0	0	0
Synpcc7942_0965	637799384	amt1	ammonium transporter protein Amt1-like	chromosome	+	972388	973350	1	0.171085	227.646	0		0.368667	0.289744	0.2789	0.276848	0.356338	0.343352	0.288238	0.447383	0.45846	0.447864	0.339978	0.521054	0.318557	0.367979	0.122062	-0.22548	-0.280509	-0.291162	0.0729868	0.0194296	-0.232996	0.401252	0.436537	0.402802	0.00518197	0.621175	-0.088707	0.119364	0	0	0	0	0	0
Synpcc7942_0966	637799385		hypothetical protein	chromosome	-	973359	973946	0	0.10209	125.324	0		0.20816	0.246475	0.317682	0.302956	0.237233	0.29549	0.280905	0.210916	0.31878	0.263085	0.317403	0.219408	0.227839	0.27209	-0.201103	0.0426407	0.408783	0.340308	-0.0124924	0.30431	0.231283	-0.182131	0.413761	0.136728	0.407517	-0.12518	-0.0707842	0.185285	0	0	0	0	0	0
Synpcc7942_0967	637799386	hemC	porphobilinogen deaminase	chromosome	+	974099	975061	1	0.262677	154.378	1	Dawn	1.12756	1.34107	1.68295	2.07418	1.5941	1.33186	1.22529	1.60531	1.32712	0.757789	0.70377	0.852271	1.32211	1.51704	-0.371525	-0.121342	0.206266	0.507812	0.12802	-0.131289	-0.251606	0.13813	-0.136427	-0.944858	-1.05155	-0.775342	-0.141882	0.0565369	0	0	0	0	1	170
Synpcc7942_0968	637799387		hypothetical protein	chromosome	+	975143	975358	0	0.358286	197.18	0		0.334693	0.310408	0.522017	0.629679	0.477893	0.273005	0.351804	0.399416	0.337075	0.105091	0.194043	0.231287	0.440452	0.435569	-0.143269	-0.251943	0.497987	0.768508	0.370579	-0.437183	-0.0713361	0.111782	-0.133039	-1.81447	-0.929731	-0.676427	0.252876	0.236794	0	0	0	0	0	0
Synpcc7942_0969	637799388		Carboxymethylenebutenolidase	chromosome	-	975368	976195	0	0.0843258	48.9205	0		0.144366	0.424813	0.298657	0.211508	0.0471716	0.0712186	0.106434	0.184947	0.0916744	0.0812296	0.0926441	0.351405	0.204593	0.224947	-0.206629	1.35046	0.842128	0.344352	-1.82037	-1.22603	-0.646409	0.150748	-0.86177	-1.03628	-0.846591	1.07677	0.296397	0.43322	0	0	0	0	0	0
Synpcc7942_0970	637799389	crtD	phytoene dehydrogenase-like	chromosome	+	976311	977882	0	0.151576	317.155	0		0.0478097	0.282812	0.142224	0.0914977	0.0168599	0.0261245	0.0208128	0.0456203	0.0285777	0.0219273	0.023644	0.0953395	0.064843	0.0689633	0.354289	2.91876	1.92707	1.29072	-1.14942	-0.517611	-0.84554	0.28666	-0.388123	-0.770283	-0.661538	1.35006	0.793936	0.882815	0	0	0	0	0	0
Synpcc7942_0971	637799390		hypothetical protein	chromosome	-	977903	979261	0	0.380157	290.848	0		0.729474	1.65808	1.38983	1.47509	0.597901	1.10338	0.539356	0.751483	0.821291	0.642144	0.613917	1.2022	1.52262	0.752037	0.430829	1.61542	1.36081	1.44671	0.14388	1.02784	-0.00479055	0.473714	0.601866	0.246871	0.182015	1.15158	1.49246	0.474777	0	0	0	0	0	0
Synpcc7942_0972	637799391		YjgF-like protein	chromosome	+	979369	979761	1	0.17727	159.011	0		0.329659	0.465885	0.487624	0.54822	0.379791	0.345647	0.33032	0.476097	0.331108	0.2289	0.158968	0.282177	0.396469	0.364564	-0.271055	0.227944	0.293737	0.462725	-0.066827	-0.20273	-0.268166	0.259225	-0.26473	-0.797313	-1.32329	-0.495431	-0.00482464	-0.125859	0	0	0	0	0	0
Synpcc7942_0973	637799392	ugd	UDP-glucose 6-dehydrogenase	chromosome	-	979758	980930	1	0.0602032	316.858	0		0.0506477	0.0602373	0.0519822	0.0482275	0.0451896	0.0466811	0.062533	0.0386136	0.0429208	0.0444374	0.0579798	0.0650548	0.0442774	0.0578143	-0.609842	-0.35968	-0.57232	-0.680483	-0.774347	-0.727498	-0.305721	-1.00123	-0.848661	-0.798564	-0.414787	-0.248682	-0.803768	-0.418911	0	0	0	0	0	0
Synpcc7942_0974	637799393		UDP-glucose dehydrogenase	chromosome	-	980967	981137	1	0.137835	145.932	0		0.200921	0.190015	0.17829	0.183009	0.236567	0.104686	0.225278	0.21127	0.190242	0.22616	0.217359	0.240784	0.156122	0.229014	-0.243607	-0.32412	-0.416009	-0.378321	-0.00798228	-1.18416	-0.0785257	-0.171146	-0.3224	-0.0728869	-0.130152	0.0175074	-0.607564	-0.0547951	0	0	0	0	0	0
Synpcc7942_0975	637799394	mraW	S-adenosyl-methyltransferase MraW	chromosome	-	981254	982144	0	0.101998	72.0242	0		0.0634642	0.0636734	0.0689776	0.0952371	0.0649716	0.059092	0.0467888	0.0629382	0.0556359	0.0386866	0.0319522	0.049908	0.0533881	0.0616404	-0.10018	-0.0954314	0.0200051	0.4854	-0.0663147	-0.203161	-0.53996	-0.112187	-0.290108	-0.814288	-1.09021	-0.446852	-0.349604	-0.142248	0	0	0	0	0	0
Synpcc7942_0976	637799395		CBS	chromosome	+	982168	984897	0	0.0643804	83.9735	0		0.0603038	0.0595102	0.0577879	0.0502617	0.0679582	0.0609439	0.0655284	0.0438479	0.0661068	0.0609758	0.0897998	0.0516813	0.0497842	0.0573794	-0.0748617	-0.0939742	-0.136343	-0.337652	0.0975372	-0.0596279	0.0450093	-0.534602	0.0576871	-0.0588742	0.499602	-0.297469	-0.351422	-0.146577	0	0	0	0	0	0
Synpcc7942_0977	637799396	prk	phosphoribulokinase	chromosome	-	985009	986010	0	0.143568	157.459	0		13.7055	13.457	15.4969	15.7578	12.7521	13.0997	12.8351	13.5475	13.0113	11.0612	8.98943	9.44183	13.0112	14.3974	-0.128879	-0.155283	0.0483374	0.0724246	-0.232907	-0.194107	-0.223548	-0.145607	-0.203873	-0.438133	-0.737336	-0.6665	-0.203881	-0.057827	0	0	0	0	1	171
Synpcc7942_0978	637799397	petH	ferredoxin-NADP oxidoreductase	chromosome	+	986415	987626	0	0.323978	163.295	0		4.29822	4.96946	6.47356	7.2948	6.36351	5.72905	4.69014	6.86337	5.31452	3.84154	3.13391	3.90995	5.13831	4.9732	-0.280648	-0.0712992	0.31017	0.48248	0.285435	0.133907	-0.154756	0.39453	0.0255524	-0.442704	-0.736425	-0.417237	-0.0230944	-0.0702131	0	0	0	0	1	171
Synpcc7942_0979	637799398		hypothetical protein	chromosome	-	988074	988577	0	0.156528	250.619	0		0.151961	0.130985	0.0681726	0.0477633	0.229721	0.250719	0.139256	0.0791699	0.216691	0.291919	0.241639	0.121997	0.11557	0.104233	0.154416	-0.0598811	-1.00202	-1.51531	0.750595	0.876783	0.0284514	-0.786263	0.666353	1.09628	0.823565	-0.162437	-0.240514	-0.389468	0	0	0	0	0	0
Synpcc7942_0980	637799399		hypothetical protein	chromosome	-	988653	989276	0	0.0577415	8.45636	0		0.068825	0.135551	0.0721241	0.0723338	0.0380029	0.0421882	0.0490496	0.0535755	0.0310319	0.033683	0.0544954	0.0475086	0.0824551	0.0673508	0.230729	1.20856	0.298278	0.302466	-0.626093	-0.475363	-0.257962	-0.130632	-0.918453	-0.800185	-0.106068	-0.304016	0.491405	0.199492	0	0	0	0	0	0
Synpcc7942_0981	637799400		hypothetical protein	chromosome	-	989800	991494	0	0.147291	259.435	0		0.263086	0.161268	0.181295	0.208417	0.251005	0.20874	0.188044	0.296487	0.299312	0.295618	0.221149	0.319028	0.185854	0.225124	0.0112608	-0.694809	-0.525934	-0.324801	-0.0565556	-0.322567	-0.473203	0.183693	0.197376	0.179462	-0.239255	0.289411	-0.490106	-0.213553	0	0	0	0	0	0
Synpcc7942_0982	637799401		hypothetical protein	chromosome	+	991553	992167	0	0.0360133	79.5283	0		0.645948	0.668385	0.667272	0.517661	0.690661	0.688315	0.644402	0.577789	0.706546	0.713592	0.829394	0.598084	0.659823	0.677152	-0.0617867	-0.0125253	-0.0149292	-0.381197	0.0347742	0.029864	-0.065242	-0.222662	0.0675789	0.0818962	0.298854	-0.172855	-0.0311251	0.00627628	0	0	0	0	0	0
Synpcc7942_0983	637799402	deoC	deoxyribose-phosphate aldolase	chromosome	+	992187	992873	0	0.106455	168.652	0		0.610549	0.651638	0.500131	0.462532	0.5198	0.446038	0.508503	0.463863	0.531027	0.499296	0.605488	0.493849	0.618226	0.54779	0.187905	0.281869	-0.0998951	-0.212648	-0.0442449	-0.265033	-0.0759444	-0.208503	-0.0134155	-0.102305	0.175897	-0.11813	0.205934	0.0314231	0	0	0	0	0	0
Synpcc7942_0984	637799403	recO	DNA repair protein RecO	chromosome	+	992870	993670	0	0.109658	345.602	0		0.206423	0.268502	0.244683	0.214881	0.219427	0.226116	0.219384	0.197913	0.198232	0.185779	0.224114	0.250848	0.249061	0.253993	-0.1864	0.192924	0.05891	-0.128468	-0.0982627	-0.0549414	-0.0985513	-0.247143	-0.244816	-0.338423	-0.0677715	0.0948092	0.0844918	0.112783	0	0	0	0	0	0
Synpcc7942_0985	637799404		hypothetical protein	chromosome	+	993654	995036	0	0.0565292	107.303	0		0.485467	0.639566	0.576307	0.549599	0.414042	0.404304	0.481918	0.379358	0.324272	0.322795	0.382543	0.429902	0.466794	0.449953	-0.0349789	0.362739	0.212483	0.144025	-0.264578	-0.298912	-0.0455645	-0.390793	-0.617151	-0.623734	-0.378731	-0.210347	-0.091566	-0.144579	0	0	0	0	0	0
Synpcc7942_0986	637799405		probable glycosyltransferase	chromosome	+	995080	996231	0	0.0852653	15.1198	0		0.219332	0.380548	0.466286	0.417406	0.132591	0.16362	0.185522	0.307051	0.160693	0.155447	0.137295	0.495614	0.341294	0.336212	-0.242346	0.552618	0.845755	0.685991	-0.968477	-0.665111	-0.483873	0.243016	-0.691151	-0.73904	-0.918185	0.933756	0.395554	0.373911	0	0	0	0	0	0
Synpcc7942_0987	637799406	fur	putative ferric uptake regulator, FUR family	chromosome	-	996280	996723	0	0.108084	133.232	0		0.707719	0.588936	0.505728	0.431031	0.746163	0.744702	0.607338	0.564714	0.771067	0.888065	0.77835	0.57619	0.612211	0.691629	0.0400947	-0.224971	-0.44472	-0.67529	0.116408	0.113581	-0.180583	-0.285561	0.163773	0.367583	0.177336	-0.256538	-0.169053	0.00691512	0	0	0	0	0	0
Synpcc7942_0988	637799407	ycf54	conserved hypothetical protein YCF54	chromosome	-	996948	997274	0	0.123694	137.666	0		1.55414	1.24601	1.39703	1.36007	1.98575	1.67452	1.7219	1.42635	1.80493	1.88971	2.31199	1.22053	1.42947	1.63136	0.1146	-0.204197	-0.0391511	-0.0778353	0.468169	0.222236	0.262489	-0.00918474	0.330425	0.396646	0.687621	-0.234005	-0.00603683	0.184561	0	0	0	0	1	174
Synpcc7942_0989	637799408		hypothetical protein	chromosome	-	997379	997822	1	0.611399	346.43	1	Dusk	1.24294	0.563381	0.384746	0.359193	1.48447	1.50126	1.31095	0.612077	2.11258	2.51271	3.30932	1.03368	0.981724	1.17028	0.422842	-0.718734	-1.26894	-1.36809	0.679032	0.69526	0.499692	-0.59913	1.18809	1.43833	1.83562	0.156873	0.0824735	0.335941	0	0	1	81	0	0
Synpcc7942_0990	637799409	cobU, cobP	adenosylcobinamide kinase/adenosylcobinamide-phosphate guanylyltransferase	chromosome	-	997912	998454	0	0.0652823	126.518	0		0.117319	0.21941	0.165766	0.160706	0.119455	0.186169	0.135085	0.158884	0.121247	0.126961	0.132531	0.210294	0.223479	0.212844	-0.357634	0.545551	0.141072	0.0963506	-0.331603	0.308538	-0.154207	0.0798944	-0.310124	-0.243695	-0.181744	0.48433	0.572063	0.501718	0	0	0	0	0	0
Synpcc7942_0991	637799410	pxcA	proton extrusion protein PcxA	chromosome	-	998464	999729	0	0.0762502	175.329	0		0.375417	0.400871	0.328353	0.30281	0.336613	0.326053	0.348886	0.330086	0.318755	0.359932	0.371672	0.40025	0.375358	0.406281	0.0835763	0.178221	-0.109668	-0.226504	-0.0738281	-0.11981	-0.0221598	-0.102076	-0.152471	0.0228068	0.0691119	0.175982	0.0833483	0.197562	0	0	0	0	0	0
Synpcc7942_0992	637799411		hypothetical protein	chromosome	+	999802	1001799	0	0.109034	285.942	0		0.134343	0.134747	0.1119	0.123797	0.122528	0.119637	0.128625	0.102553	0.133745	0.141383	0.150802	0.134087	0.122199	0.131705	-0.0839866	-0.0796579	-0.347703	-0.201929	-0.2168	-0.251242	-0.146736	-0.473544	-0.0904281	-0.010295	0.082743	-0.0867375	-0.220672	-0.112602	0	0	0	0	0	0
Synpcc7942_0993	637799412		hypothetical protein	chromosome	-	1001766	1003145	1	0.16411	151.741	0		0.324176	0.281423	0.327178	0.383767	0.461439	0.429601	0.318153	0.398157	0.514687	0.341774	0.318046	0.21681	0.286313	0.278588	-0.181873	-0.38591	-0.168571	0.0615836	0.327492	0.224349	-0.208926	0.114687	0.485045	-0.105608	-0.209412	-0.762215	-0.361054	-0.400518	0	0	0	0	0	0
Synpcc7942_0994	637799413		hypothetical protein	chromosome	-	1003177	1003746	0	0.0693189	270.579	0		0.261197	0.202683	0.262341	0.258676	0.302235	0.254941	0.24256	0.326365	0.334282	0.283192	0.30939	0.228263	0.229073	0.261412	-0.171503	-0.537418	-0.165198	-0.185495	0.0390313	-0.206475	-0.2783	0.149844	0.184425	-0.054859	0.0727866	-0.365941	-0.360834	-0.170318	0	0	0	0	0	0
Synpcc7942_0995	637799414	ycf20	conserved hypothetical protein YCF20	chromosome	+	1003809	1004204	0	0.124725	161.171	0		0.399463	0.315184	0.338506	0.364738	0.371629	0.406848	0.363798	0.378537	0.395102	0.390641	0.311534	0.311925	0.30276	0.381098	-0.2356	-0.57747	-0.474479	-0.366802	-0.339797	-0.209171	-0.370526	-0.313227	-0.251438	-0.267819	-0.594271	-0.592463	-0.635489	-0.303499	0	0	0	0	0	0
Synpcc7942_0996	637799415		glycerate kinase	chromosome	+	1004254	1005240	0	0.0571705	302.777	0		0.190004	0.171918	0.1618	0.16646	0.121544	0.156833	0.169486	0.166079	0.165584	0.16099	0.196302	0.196901	0.15934	0.164032	-0.140116	-0.284426	-0.371936	-0.330972	-0.784668	-0.416924	-0.30498	-0.334277	-0.338587	-0.379176	-0.0930719	-0.0886749	-0.394043	-0.352175	0	0	0	0	0	0
Synpcc7942_0997	637799416	rpmF, rpl32	50S ribosomal protein L32	chromosome	-	1005256	1005432	0	0.371813	61.042	0		4.70716	7.69844	8.72167	8.33704	4.20056	4.4203	3.75357	3.88415	3.84215	2.54593	2.9086	2.70772	5.08432	4.62469	-0.20815	0.501559	0.681596	0.616527	-0.372427	-0.298864	-0.534743	-0.48541	-0.501096	-1.09482	-0.902683	-1.00593	-0.0969536	-0.233651	0	0	0	0	1	175
Synpcc7942_0998	637799417	ftsH	FtsH peptidase homologue, chloroplast. Metallo peptidase. MEROPS family M41	chromosome	+	1005621	1007519	0	0.11788	209.121	0		0.597426	0.653181	0.556812	0.490264	0.524477	0.537877	0.534376	0.592309	0.772924	0.738458	0.861612	0.707411	0.754038	0.624449	0.132057	0.260781	0.0304885	-0.153143	-0.0558234	-0.0194262	-0.0288476	0.119647	0.503625	0.437814	0.660337	0.375847	0.467936	0.195881	0	0	0	0	1	175
Synpcc7942_0999	637799418		hypothetical protein	chromosome	-	1007581	1007880	0	0.137113	332.529	0		0.954373	0.814893	0.856555	0.756284	0.520774	0.526509	0.789801	1.53675	2.94847	1.8496	1.61063	1.22241	1.52576	1.42	-0.188199	-0.416143	-0.344206	-0.523825	-1.06209	-1.04629	-0.461264	0.499059	1.43914	0.766388	0.566802	0.168907	0.488705	0.385067	0	0	0	0	1	176
Synpcc7942_1000	637799419		hypothetical protein	chromosome	-	1008139	1011369	0	0.0616056	156.336	0		0.0245904	0.0193149	0.0215679	0.0188126	0.0181328	0.0159696	0.0173126	0.0188582	0.0218151	0.0307043	0.0259445	0.029225	0.0220839	0.0198067	-0.162335	-0.510718	-0.351545	-0.54873	-0.601827	-0.785098	-0.668611	-0.545237	-0.335103	0.158013	-0.085001	0.0867727	-0.317432	-0.474439	0	0	0	0	0	0
Synpcc7942_1001	637799420	lysC	aspartate kinase	chromosome	-	1011886	1013736	0	0.192818	127.762	0		0.418795	0.359997	0.496479	0.542643	0.605902	0.522243	0.468122	0.495806	0.474525	0.300681	0.24908	0.258923	0.380502	0.42546	-0.33723	-0.555488	-0.0917423	0.03653	0.195611	-0.0187542	-0.17659	-0.0936981	-0.15699	-0.815239	-1.08687	-1.03095	-0.475569	-0.314449	0	0	0	0	0	0
Synpcc7942_1002	637799422	psaD	photosystem I reaction center subunit II	chromosome	+	1013888	1014316	0	0.353561	30.7322	0		81.4521	6.78055	13.4293	24.6689	85.0859	84.5925	66.0506	61.1408	115.181	103.16	77.9167	25.7871	31.8132	45.026	0.0920577	-3.49442	-2.50851	-1.6312	0.155027	0.146636	-0.210321	-0.321759	0.591941	0.432925	0.0280396	-1.56725	-1.26427	-0.763136	0	0	1	82	1	177
Synpcc7942_1003	637799423	trpE	anthranilate synthase, component I	chromosome	+	1014434	1015987	0	0.0635115	101.003	0		0.926737	0.447386	0.604133	0.678109	1.17187	1.13366	1.19362	0.91534	0.876733	0.929993	0.965368	0.692064	0.731842	1.00064	-0.0807498	-1.13139	-0.698042	-0.531392	0.257829	0.21	0.284364	-0.0986013	-0.160772	-0.0756896	-0.0218312	-0.502004	-0.421377	0.0299433	0	0	0	0	0	0
Synpcc7942_1004	637799424		hypothetical protein	chromosome	-	1015963	1016316	0	0.0746594	68.1687	0		0.0222417	0.0335095	0.0464791	0.0119003	0.0295536	0.0178478	0.0268325	0.0350335	0.0459482	0.0308741	0.042445	0.049626	0.0287947	0.0350764	-1.25785	-0.666552	-0.19454	-2.16012	-0.847787	-1.57538	-0.987139	-0.602388	-0.211114	-0.784723	-0.325527	-0.100025	-0.88532	-0.600622	0	0	0	0	0	0
Synpcc7942_1005	637799425		HAD-superfamily hydrolase subfamily IA, variant 3	chromosome	+	1016315	1016944	0	0.131331	147.536	0		0.123841	0.147359	0.14902	0.153798	0.104066	0.10363	0.104704	0.128384	0.0897501	0.105424	0.075316	0.142911	0.124816	0.144032	-0.000190815	0.250647	0.266819	0.312351	-0.25118	-0.257236	-0.242371	0.0517777	-0.464698	-0.232473	-0.717655	0.206435	0.0111213	0.217703	0	0	0	0	0	0
Synpcc7942_1006	637799426		TPR repeat	chromosome	+	1017044	1018123	1	0.327229	215.77	0		0.30752	0.389204	0.344576	0.346602	0.194386	0.184278	0.214991	0.338505	0.265357	0.315272	0.232852	0.452915	0.282249	0.266206	-0.0328964	0.306948	0.131243	0.139703	-0.694651	-0.771692	-0.549298	0.105598	-0.245643	0.00302157	-0.434165	0.525663	-0.15661	-0.241035	0	0	0	0	0	0
Synpcc7942_1007	637799427	fumC	fumarate hydratase	chromosome	-	1018904	1020295	0	0.0995843	175.754	0		0.192314	0.46907	0.53712	0.499785	0.150316	0.167182	0.154293	0.268056	0.0906987	0.0978432	0.0778319	0.147107	0.291517	0.217175	-0.227168	1.05917	1.25461	1.15067	-0.582637	-0.429216	-0.544957	0.2519	-1.31148	-1.20209	-1.5322	-0.613772	0.372944	-0.0517776	0	0	0	0	0	0
Synpcc7942_1008	637799428	purU	formyltetrahydrofolate deformylase	chromosome	-	1020332	1021186	0	0.129414	178.401	0		0.113018	0.28834	0.306772	0.266067	0.107679	0.102223	0.0907285	0.148835	0.0471075	0.0658815	0.0573458	0.0860402	0.156689	0.148021	-0.327153	1.02407	1.11346	0.908083	-0.396968	-0.471987	-0.644077	0.0700081	-1.58968	-1.10576	-1.30594	-0.720621	0.144202	0.0621021	0	0	0	0	0	0
Synpcc7942_1009	637799429		transcriptional regulator, XRE family	chromosome	-	1021351	1021950	1	0.122387	105.766	0		0.251716	0.296559	0.345203	0.302915	0.232489	0.245704	0.228673	0.217482	0.176857	0.140121	0.196386	0.202211	0.242698	0.274608	-0.0840613	0.152462	0.371588	0.183054	-0.198698	-0.118934	-0.222573	-0.294963	-0.593276	-0.929183	-0.442163	-0.399999	-0.136695	0.0415148	0	0	0	0	0	0
Synpcc7942_1010	637799430		ribosomal large subunit pseudouridine synthase B	chromosome	-	1021969	1022700	1	0.143352	54.2035	0		0.348112	0.380475	0.378153	0.378191	0.333488	0.371146	0.476522	0.276972	0.289929	0.333075	0.463471	0.302243	0.358742	0.39994	-0.128443	-0.000190925	-0.0090236	-0.00887657	-0.190358	-0.0360057	0.32455	-0.458253	-0.392291	-0.192146	0.284487	-0.332281	-0.0850448	0.0717899	0	0	0	0	0	0
Synpcc7942_1011	637799431	sphS	PAS/PAC sensor signal transduction histidine kinase	chromosome	-	1022715	1023956	0	0.0671376	276.594	0		0.082989	0.0847134	0.0677969	0.0731678	0.0763731	0.0712186	0.080728	0.0738051	0.0810726	0.0791989	0.0904155	0.133932	0.111774	0.0742131	-0.22969	-0.20002	-0.52139	-0.4114	-0.349545	-0.450354	-0.269539	-0.398889	-0.263394	-0.297129	-0.106038	0.460818	0.199903	-0.390935	0	0	0	0	0	0
Synpcc7942_1012	637799432	sphR	two component transcriptional regulator, winged helix family	chromosome	-	1023969	1024742	0	0.150623	16.7659	0		0.159062	0.148596	0.135675	0.170282	0.136069	0.14013	0.13704	0.152567	0.105075	0.169449	0.177781	0.211367	0.177477	0.141299	-0.0328697	-0.131065	-0.262302	0.065462	-0.258123	-0.215691	-0.247863	-0.0930132	-0.631036	0.0583887	0.127638	0.377293	0.12517	-0.203708	0	0	0	0	0	0
Synpcc7942_1013	637799433		hypothetical protein	chromosome	-	1025389	1025625	1	0.157759	228.228	1	Dusk	0.809405	0.870472	0.67791	0.677997	0.532664	0.595378	0.610091	0.725774	0.617683	0.599506	0.65401	0.91498	0.944167	0.626696	0.281262	0.386198	0.025493	0.0256778	-0.322375	-0.161795	-0.126576	0.123919	-0.108732	-0.151827	-0.0262884	0.45814	0.503442	-0.0878341	0	0	0	0	0	0
Synpcc7942_1014	637799434		CheA signal transduction histidine kinase	chromosome	-	1025629	1028415	0	0.280761	242.494	0		1.15419	1.05002	0.874963	0.839996	0.768288	0.873926	0.882351	1.12544	1.02885	1.16169	1.14579	1.42201	1.24876	0.809845	0.108662	-0.0278021	-0.290919	-0.349758	-0.478493	-0.292629	-0.278788	0.0722718	-0.0571801	0.118016	0.0981324	0.40972	0.222282	-0.402495	0	0	0	0	0	0
Synpcc7942_1015	637799435		methyl-accepting chemotaxis sensory transducer	chromosome	-	1028418	1030937	1	0.251404	242.654	1	Dusk	1.05151	0.891519	0.759116	0.753943	0.7614	0.961088	0.799936	1.01209	0.916557	1.09795	1.13445	1.27836	0.977919	0.784025	0.0309906	-0.207141	-0.439085	-0.448951	-0.434752	-0.0987374	-0.363522	-0.0241399	-0.167181	0.0933326	0.140511	0.312813	-0.0736916	-0.392507	0	0	0	0	0	0
Synpcc7942_1016	637799436	cheW	CheW protein	chromosome	-	1030953	1031435	1	0.339027	206.337	1	Dusk	0.908433	0.814743	0.81757	0.712711	0.867861	0.94183	0.846734	0.987995	0.931712	1.05308	1.11664	1.2787	0.986871	0.752458	-0.095728	-0.252763	-0.247765	-0.445791	-0.161644	-0.0436407	-0.197199	0.0253966	-0.0592242	0.117441	0.201986	0.397497	0.0237544	-0.367496	0	0	0	0	0	0
Synpcc7942_1017	637799437		hypothetical protein	chromosome	-	1031697	1032458	0	0.0933209	172.163	0		0.20102	0.226743	0.258477	0.249572	0.26727	0.239071	0.25208	0.210873	0.182966	0.19639	0.202375	0.20461	0.235054	0.21372	-0.109999	0.0637204	0.2527	0.202124	0.300965	0.140105	0.216548	-0.0409637	-0.245761	-0.143612	-0.100307	-0.0844608	0.115657	-0.0216158	0	0	0	0	0	0
Synpcc7942_1018	637799438		hypothetical protein	chromosome	+	1032577	1033212	0	0.184014	110.082	0		0.208206	0.194624	0.175767	0.228993	0.220426	0.205306	0.189178	0.268758	0.22165	0.23662	0.110665	0.279673	0.169431	0.21476	-0.330959	-0.428281	-0.575311	-0.193668	-0.248683	-0.351201	-0.469231	0.0373324	-0.240694	-0.146404	-1.24278	0.0947677	-0.628279	-0.286247	0	0	0	0	0	0
Synpcc7942_1019	637799439	malQ	4-alpha-glucanotransferase	chromosome	+	1033300	1034799	1	0.188878	6.96283	1	Dusk	0.22905	0.129283	0.123886	0.113543	0.213425	0.310289	0.320845	0.178659	0.218941	0.284726	0.426514	0.232405	0.176361	0.217776	0.0609988	-0.764133	-0.825648	-0.951424	-0.040935	0.498954	0.547218	-0.297456	-0.00411869	0.374914	0.957933	0.0819795	-0.316133	-0.0118167	0	0	0	0	0	0
Synpcc7942_1020	637799440	menC	O-succinylbenzoate synthase	chromosome	+	1034796	1035746	0	0.0848086	317.446	0		0.112899	0.0916536	0.0956664	0.0727749	0.101943	0.15834	0.170908	0.0714412	0.0749307	0.121114	0.17546	0.14605	0.110758	0.109979	-0.174868	-0.475638	-0.413817	-0.808387	-0.322139	0.313128	0.423319	-0.835073	-0.766272	-0.0735338	0.461242	0.196565	-0.202489	-0.212677	0	0	0	0	0	0
Synpcc7942_1021	637799441	menE	O-succinylbenzoic acid--CoA ligase	chromosome	+	1035731	1037074	0	0.0864386	11.7501	0		0.0729627	0.0633181	0.0608513	0.0649282	0.0601979	0.0822671	0.0895216	0.054563	0.0386125	0.0444134	0.0864957	0.0955827	0.080177	0.0817285	0.0638042	-0.140736	-0.198067	-0.104509	-0.21364	0.236961	0.358882	-0.355431	-0.854286	-0.65236	0.309274	0.453395	0.199834	0.227485	0	0	0	0	0	0
Synpcc7942_1022	637799442		hypothetical protein	chromosome	-	1037049	1037837	1	0.0470714	257.394	0		0.316612	0.391555	0.34102	0.266966	0.356247	0.375029	0.282246	0.323937	0.581162	0.55196	0.628444	0.368775	0.374044	0.389811	-0.0972997	0.209199	0.00983927	-0.343362	0.0728597	0.146986	-0.263064	-0.0643055	0.778923	0.704546	0.891768	0.122724	0.143191	0.202757	0	0	0	0	0	0
Synpcc7942_1023	637799443		hypothetical protein	chromosome	-	1037841	1038086	0	0.0839886	293.393	0		0.590664	0.459148	0.452454	0.35473	0.595398	0.526509	0.482658	0.390161	1.03904	0.833891	0.900118	0.508818	0.546564	0.485344	0.163459	-0.19992	-0.221105	-0.572158	0.174976	-0.00241893	-0.127876	-0.434809	0.978298	0.660982	0.771236	-0.0517279	0.0515121	-0.11987	0	0	0	0	0	0
Synpcc7942_1024	637799444		hypothetical protein	chromosome	-	1038106	1039098	0	0.0493559	354.198	0		0.14849	0.125693	0.156436	0.132121	0.167167	0.165429	0.168462	0.119463	0.169263	0.154938	0.175206	0.132686	0.120738	0.138512	-0.0293383	-0.269806	0.0458718	-0.197845	0.141585	0.126506	0.15272	-0.343145	0.159565	0.031982	0.20935	-0.19169	-0.327825	-0.129691	0	0	0	0	0	0
Synpcc7942_1025	637799445		TPR repeat	chromosome	+	1039168	1039638	0	0.139954	302.505	0		0.240113	0.224479	0.191106	0.204439	0.174737	0.185564	0.22744	0.216371	0.235162	0.264177	0.181334	0.27158	0.160768	0.20178	1.93125e-05	-0.0971118	-0.329322	-0.232024	-0.458512	-0.371779	-0.078206	-0.150185	-0.0300374	0.137813	-0.405045	0.177683	-0.578713	-0.250914	0	0	0	0	0	0
Synpcc7942_1026	637799448		fibronectin binding protein-like	chromosome	-	1039971	1041725	1	0.240541	255.809	0		0.0803468	0.0816979	0.0794141	0.0720123	0.0759065	0.0684012	0.0757732	0.0718948	0.0794416	0.0560484	0.0653382	0.0660037	0.0713574	0.0819095	-0.295911	-0.271852	-0.312756	-0.453908	-0.377927	-0.528129	-0.380463	-0.456264	-0.312257	-0.815477	-0.594224	-0.579605	-0.467089	-0.26812	0	0	0	0	0	0
Synpcc7942_1027	637799449		hypothetical protein	chromosome	+	1041800	1042114	0	0.122108	28.7554	0		0.0545356	0.036021	0.0261168	0.0133737	0.0265701	0.0501437	0.0284794	0.0410827	0.0295069	0.0266897	0.0527212	0.0487989	0.0354416	0.0515482	0.16256	-0.435801	-0.899658	-1.86524	-0.874833	0.0414313	-0.77472	-0.246106	-0.723587	-0.868353	0.113744	0.00221109	-0.459194	0.0812831	0	0	0	0	0	0
Synpcc7942_1028	637799450		hypothetical protein	chromosome	-	1042384	1043340	0	0.145158	257.408	0		0.274494	0.353537	0.392908	0.418819	0.351284	0.286087	0.246484	0.303694	0.233095	0.198542	0.212372	0.209384	0.300773	0.246025	-0.0458876	0.319198	0.471528	0.563664	0.309972	0.0137871	-0.201173	0.0999518	-0.281746	-0.513224	-0.41607	-0.436513	0.0860109	-0.203857	0	0	0	0	0	0
Synpcc7942_1029	637799451	ilvE	branched-chain amino acid aminotransferase	chromosome	+	1043944	1044858	0	0.265029	184.368	0		0.74003	0.960488	1.16143	1.1668	0.840008	0.71237	0.665544	0.845059	0.656044	0.436443	0.390655	0.496189	0.789365	0.855988	-0.206172	0.170011	0.444075	0.450731	-0.0233534	-0.26113	-0.359221	-0.014705	-0.379963	-0.967964	-1.12786	-0.782866	-0.113063	0.00383432	0	0	1	86	0	0
Synpcc7942_1030	637799452	hisC	histidinol-phosphate aminotransferase	chromosome	+	1044888	1046009	1	0.162995	104.716	1	Dawn	0.602225	0.686294	0.830703	0.787941	0.708033	0.579066	0.651873	0.601206	0.502564	0.409873	0.335498	0.398775	0.560671	0.678485	-0.227739	-0.039214	0.236291	0.160046	0.00577658	-0.284312	-0.113451	-0.230182	-0.488735	-0.782864	-1.07174	-0.822467	-0.330886	-0.0557234	0	0	0	0	0	0
Synpcc7942_1031	637799453		hypothetical protein	chromosome	-	1046015	1046356	0	0.230786	285.572	0		0.127668	0.0934994	0.0863149	0.0615895	0.0999293	0.120081	0.0956661	0.100905	0.206095	0.248285	0.182674	0.253626	0.0837379	0.0865786	0.386719	-0.0626525	-0.178	-0.664926	0.0332981	0.298327	-0.0296024	0.0473159	1.07763	1.34631	0.903592	1.37702	-0.221729	-0.173599	0	0	0	0	0	0
Synpcc7942_1032	637799454		hypothetical protein	chromosome	+	1046506	1047972	1	0.455618	54.2264	1	Dawn	0.622587	0.689783	0.329547	0.373315	0.301427	1.51241	0.838143	0.721521	0.59504	0.586274	0.317513	2.86432	1.00884	0.645887	0.328602	0.476469	-0.589188	-0.409278	-0.717865	1.60911	0.757524	0.541368	0.263314	0.241901	-0.642857	2.53045	1.02496	0.381609	0	0	0	0	0	0
Synpcc7942_1033	637799455		hypothetical protein	chromosome	+	1047992	1048948	0	0.358848	10.4397	0		0.632758	0.788453	0.348409	0.399325	0.255082	0.426929	0.722908	0.734161	0.621587	0.533251	0.28757	3.2641	1.20969	0.650246	0.307234	0.624604	-0.553638	-0.356858	-1.00346	-0.260424	0.499392	0.521676	0.281535	0.0603939	-0.830507	2.67419	1.24214	0.346564	0	0	0	0	0	0
Synpcc7942_1034	637799456		Transglutaminase-like	chromosome	+	1048952	1049815	0	0.127383	336.587	0		0.316467	0.605296	0.310297	0.284191	0.18809	0.14869	0.508772	0.416266	0.299423	0.280242	0.140956	2.14639	0.828095	0.504664	-0.196688	0.738895	-0.225093	-0.351882	-0.947324	-1.28644	0.488276	0.198761	-0.276559	-0.37207	-1.3635	2.5651	1.19105	0.476577	0	0	0	0	0	0
Synpcc7942_1035	637799457		putative proteasome-type protease	chromosome	-	1049766	1050560	0	0.0986438	186.521	0		0.245796	0.277664	0.338446	0.382286	0.416725	0.380146	0.317951	0.350657	0.344896	0.278127	0.32528	0.294175	0.321766	0.343016	-0.395123	-0.219244	0.0663422	0.242069	0.36651	0.23397	-0.0237786	0.117475	0.0935782	-0.21684	0.00909602	-0.135912	-0.00657443	0.0856896	0	0	0	0	0	0
Synpcc7942_1036	637799458		hypothetical protein	chromosome	+	1050754	1051257	0	0.188288	129.966	0		0.881943	0.498358	0.27269	0.265086	0.611666	2.02664	1.22503	0.976785	1.41694	1.34783	0.971262	2.18942	0.774322	0.623506	-0.231657	-1.05516	-1.92508	-1.96588	-0.759597	0.968677	0.242406	-0.0843013	0.452369	0.380226	-0.0924817	1.08013	-0.419408	-0.73194	0	0	0	0	1	179
Synpcc7942_1037	637799459	speA	arginine decarboxylase	chromosome	+	1051311	1053254	0	0.123409	116.616	0		0.414224	0.386551	0.407507	0.376136	0.363084	0.523259	0.397137	0.375007	0.308388	0.372359	0.343745	0.541363	0.413486	0.389138	0.0753985	-0.0243561	0.051809	-0.0637607	-0.114711	0.412512	0.0146229	-0.0680971	-0.350268	-0.0783204	-0.193674	0.461582	0.0728226	-0.0147315	0	0	0	0	0	0
Synpcc7942_1038	637799460		photosystem II oxygen-evolving complex 23K protein	chromosome	+	1053264	1053851	0	0.057272	288.704	0		0.141208	0.190338	0.203283	0.189347	0.141154	0.145059	0.175005	0.183405	0.111968	0.115814	0.131803	0.225944	0.236919	0.198991	-0.147233	0.283507	0.378435	0.275977	-0.147789	-0.10842	0.162336	0.229977	-0.48197	-0.433243	-0.246675	0.530908	0.59934	0.347647	0	0	0	0	0	0
Synpcc7942_1039	637799461		hypothetical protein	chromosome	-	1053877	1054353	0	0.237882	168.739	0		0.162063	0.316805	0.147106	0.107242	0.0584877	0.406196	0.25445	0.299562	0.131528	0.114564	0.0795791	1.61704	0.371425	0.186226	-0.812416	0.154623	-0.952113	-1.4081	-2.28277	0.513202	-0.161594	0.0738793	-1.1136	-1.31281	-1.83851	2.50631	0.384096	-0.611922	0	0	0	0	0	0
Synpcc7942_1040	637799462		hypothetical protein	chromosome	+	1054722	1055279	1	0.548162	13.6672	1	Dusk	0.291186	0.0831863	0.0511682	0.0647115	0.392481	0.649173	0.726306	0.0802052	0.347023	0.664445	1.05726	0.219398	0.191375	0.345774	-0.0713368	-1.87886	-2.57996	-2.24119	0.359342	1.08532	1.2473	-1.93151	0.181752	1.11887	1.78898	-0.479727	-0.676879	0.176549	0	0	0	0	0	0
Synpcc7942_1041	637799463		hypothetical protein	chromosome	-	1055349	1055621	0	0.0861111	342.374	0		0.0288409	0.0170029	0.0106358	0.0110223	0.0178837	0.0231433	0.00773196	0.0197513	0.0170232	0.0153979	0.0318644	0.0261423	0.0160021	0.0244912	0.348685	-0.413652	-1.0905	-1.03901	-0.340785	0.031159	-1.55053	-0.197484	-0.411931	-0.556698	0.492514	0.206952	-0.501175	0.112831	0	0	0	0	0	0
Synpcc7942_1042	637799464		hypothetical protein	chromosome	+	1055645	1055980	1	0.600076	254.958	1	Dusk	1.19936	0.0798192	0.0849757	0.123587	0.732754	0.72395	0.444467	0.649942	1.80269	1.8541	1.35804	1.13229	0.296149	0.356763	0.733401	-3.17598	-3.08567	-2.54526	0.0225406	0.00510183	-0.698712	-0.150478	1.32129	1.36186	0.912666	0.65038	-1.28446	-1.01582	0	0	1	87	1	180
Synpcc7942_1043	637799465	vte5, cdsA	hypothetical protein	chromosome	-	1055969	1056622	0	0.114129	280.107	0		0.146658	0.156935	0.174629	0.199686	0.164235	0.148131	0.172675	0.136039	0.120802	0.106698	0.0882717	0.129272	0.153635	0.175258	-0.246757	-0.149052	0.0050777	0.198514	-0.0834534	-0.232341	-0.0111599	-0.35519	-0.526568	-0.705686	-0.979193	-0.428801	-0.179713	0.0102668	0	0	0	0	0	0
Synpcc7942_1044	637799466	thyX	Thymidylate synthase complementing protein ThyX	chromosome	-	1056740	1057462	0	0.287972	34.6198	0		0.463326	0.35739	0.354078	0.378737	0.459189	0.563649	0.609453	0.338592	0.354603	0.395362	0.510805	0.342453	0.407518	0.494753	-0.0760826	-0.450611	-0.464042	-0.366915	-0.0890231	0.206685	0.319405	-0.528565	-0.461907	-0.304936	0.0646606	-0.512205	-0.261248	0.0185972	0	0	0	0	0	0
Synpcc7942_1045	637799467		amidase enhancer-like	chromosome	-	1057543	1059114	0	0.102739	1.80425	0		0.234495	0.145015	0.151151	0.167299	0.189452	0.206986	0.231627	0.174935	0.161612	0.171675	0.201729	0.182298	0.197925	0.18289	0.249683	-0.443674	-0.383885	-0.237447	-0.0580469	0.0696604	0.231926	-0.173058	-0.287341	-0.200195	0.032542	-0.113581	0.00508134	-0.108903	0	0	0	0	0	0
Synpcc7942_1046	637799468		hypothetical protein	chromosome	+	1059261	1059689	0	0.129976	141.668	0		0.30867	0.138256	0.154542	0.182369	0.305649	0.277369	0.253397	0.266463	0.330405	0.29984	0.306004	0.214988	0.216109	0.190364	0.0333764	-1.12535	-0.964692	-0.725828	0.0191903	-0.120883	-0.251285	-0.17875	0.131547	-0.00849631	0.0208636	-0.488429	-0.48093	-0.66393	0	0	0	0	0	0
Synpcc7942_1047	637799469	cpcB1, cpcB	phycocyanin, beta subunit	chromosome	+	1060318	1060839	0	0	'NaN'	0		1.43842	0.174882	0.146477	0.410435	1.14775	1.12362	0.932079	0.922443	1.39479	0.531494	0.62114	0.217702	0.344055	0.481238	-0.467613	-3.50764	-3.76335	-2.27687	-0.793291	-0.823935	-1.09357	-1.10856	-0.512042	-1.90397	-1.6791	-3.19167	-2.53138	-2.04727	1	43	1	88	1	181
Synpcc7942_1048	637799470	cpcA1, cpcA	phycocyanin, alpha subunit	chromosome	+	1060891	1061382	0	0	'NaN'	0		0	0	0	0	0	0	0	0	0	0	0	0	0	0	NaN	NaN	NaN	NaN	NaN	NaN	NaN	NaN	NaN	NaN	NaN	NaN	NaN	NaN	0	0	0	0	0	0
Synpcc7942_1049	637799471	cpcH, cpcC1	phycobilisome rod linker polypeptide	chromosome	+	1061488	1062309	1	0.112828	105.196	0		31.0032	3.92589	3.65125	10.6204	33.273	30.6528	20.1254	26.1248	23.8539	23.1558	12.3808	5.39437	7.21126	12.7854	0.185281	-2.79605	-2.90067	-1.3603	0.287217	0.168885	-0.438119	-0.0617132	-0.192913	-0.235763	-1.13903	-2.33761	-1.91881	-1.09264	0	0	0	0	0	0
Synpcc7942_1050	637799472	cpcI, cpcI1, cpcC2	phycobilisome rod linker polypeptide	chromosome	+	1062357	1063226	0	0.1247	98.0365	0		27.8027	4.66551	3.20728	8.85847	28.908	27.416	17.5429	22.7367	22.8583	21.3245	12.3168	5.18005	6.55675	11.6826	0.127628	-2.44749	-2.98817	-1.52247	0.183869	0.107421	-0.53671	-0.162572	-0.154879	-0.255085	-1.04697	-2.29656	-1.95654	-1.12324	0	0	0	0	0	0
Synpcc7942_1051	637799473	cpcD, cpcI2	phycocyanin linker protein 9K	chromosome	+	1063318	1063563	0	0.311882	224.548	0		21.3075	3.42159	2.91145	7.71843	23.1213	21.7239	14.0185	16.5248	16.8922	15.6184	10.57	4.34727	5.98458	9.39238	0.164253	-2.47437	-2.7073	-1.30073	0.28211	0.192169	-0.439775	-0.202474	-0.170751	-0.283867	-0.847142	-2.12893	-1.66779	-1.01755	0	0	0	0	0	0
Synpcc7942_1052	637799474	cpcB2, cpcB	phycocyanin, beta subunit	chromosome	+	1064073	1064594	0	0.212443	340.263	0		0.848789	0.149193	0.106613	0.253639	0.996761	0.966276	0.597461	0.616684	1.29538	0.478344	0.748398	0.189306	0.30686	0.37145	-0.3685	-2.87672	-3.36152	-2.11113	-0.136657	-0.18147	-0.875061	-0.829374	0.241395	-1.19586	-0.550099	-2.53318	-1.83633	-1.56074	0	0	0	0	1	182
[truncated: 1,673 more rows]

## Sheet: Replicate 1
													High Light pulse expression (median and length normalized data)							Shade pulse expression (median and length normalized)							High Light pulse expression (Log2 normalized to average Low Light expression)							Shade pulse (Log2 normalized to average Low Light expression)
[truncated: 2,727 more rows]

[truncated: 2 more sheets: Legend, Light Conditions]
