# Supplementary material for: Natural changes in light interact with circadian regulation at promoters to control gene expression in cyanobacteria
Source: eLife journal article supplement (doi:10.7554/elife.32032), 2017-12-14
Supplement: supp [file elife-32032-supp-v2.zip › elife_poa_e32032_Figure_3_source_data_2.xlsx]

## Sheet: Replicate 2
					Enrichment over mock at peak max location						Log2 normalized change in enrichment from original condition								Log2 normalized change in gene target expression from original condition
					Minutes in High Light pulse			Minutes in Shade pulse			Minutes in High Light pulse			Minutes in Shade pulse					Minutes in High Light pulse			Minutes in Shade pulse
					0	15	60	0	15	60	0	15	60	0	15	60			0	15	60	0	15	60
					Hours since dawn			Hours since dawn			Hours since dawn			Hours since dawn					Hours since dawn			Hours since dawn
RNAP Peak #	Start	End	Peak max location	Q-value	8	8.25	9	8	8.25	9	8	8.25	9	8	8.25	9	Gene target of peak	High confidence class of gene target	8	8.25	9	8	8.25	9
1	11	324	111	7.47729e-128	4.19741	2.84103	3.73614	3.72068	3.8235	1.97385	0	-0.563084	-0.167951	0	0.0393299	-0.914555		0	0	0	0	0	0	0
2	8809	9081	9000	3.69906e-252	3.20257	5.61813	4.33188	3.63674	1.83436	2.70174	0	0.810862	0.435764	0	-0.987367	-0.428758	Synpcc7942_0008	0	0	-0.272852	-0.442342	0	0.179374	0.341176
3	11721	12455	11994	0	8.03459	7.96397	10.308	8.10008	6.5515	5.53	0	-0.0127361	0.359473	0	-0.306112	-0.550658	Synpcc7942_0012	0	0	0.442718	1.51682	0	-0.438311	-1.01406
3	11721	12455	11994	0	8.03459	7.96397	10.308	8.10008	6.5515	5.53	0	-0.0127361	0.359473	0	-0.306112	-0.550658	Synpcc7942_0013	0	0	2.04506	-0.605727	0	-2.03953	-0.58732
4	13981	14297	14243	0	3.3115	1.74597	1.35356	1.77727	3.26822	6.45053	0	-0.92346	-1.29072	0	0.878839	1.85975		0	0	0	0	0	0	0
5	40872	41309	41099	0	7.06708	10.3587	8.67604	6.81406	3.89194	4.14771	0	0.551659	0.295921	0	-0.808023	-0.716199	Synpcc7942_0042	0	0	0.726879	1.1517	0	-0.132362	-0.492701
6	44939	45296	45099	7.92125e-206	3.30205	1.78277	2.22458	2.625	4.53458	4.19246	0	-0.889245	-0.56983	0	0.788651	0.675478	Synpcc7942_0046	0	0	-1.11723	-1.08353	0	0.61757	1.11237
7	48391	49196	48761	0	4.81249	2.84768	2.6866	2.405	4.82344	5.08122	0	-0.756997	-0.841003	0	1.00403	1.07914		0	0	0	0	0	0	0
8	49228	49834	49457	0	11.8552	9.34069	6.19952	6.72667	9.74907	6.67843	0	-0.343922	-0.935295	0	0.535373	-0.0103824	Synpcc7942_0048	0	0	-0.678435	-0.61847	0	0.217226	0.885683
9	49821	50940	49951	0	9.90628	8.30784	7.26394	6.80725	7.7992	12.1994	0	-0.25387	-0.447591	0	0.196254	0.841669	Synpcc7942_0050	0	0	0.256491	0.138769	0	0.293078	0.336416
10	50180	50948	50346	0	4.49936	3.54041	2.86776	3.36135	3.54328	4.01636	0	-0.345806	-0.649797	0	0.0760432	0.256847	Synpcc7942_0049	0	0	-1.44425	-1.22647	0	0.594804	1.28556
11	64883	65743	65554	0	4.18149	1.51521	2.15277	2.74141	3.64484	3.63007	0	-1.4645	-0.957821	0	0.410938	0.405081	Synpcc7942_0065	0	0	-1.17084	-0.611341	0	0.577129	0.600924
12	68857	69203	69022	2.1645e-267	1.13968	0.391875	0.105434	0.571364	0.875269	3.64447	0	-1.54017	-3.43422	0	0.615315	2.67323	Synpcc7942_0069	Dusk	0	-2.45338	-3.28321	0	2.36528	4.44044
13	81269	81542	81433	0	6.0841	4.5564	4.73526	4.62505	5.7222	8.37685	0	-0.41715	-0.361601	0	0.307101	0.85694		0	0	0	0	0	0	0
14	87539	88110	87803	0	9.35617	10.7494	11.8127	8.25914	6.60553	6.96634	0	0.200262	0.33635	0	-0.322317	-0.24559	Synpcc7942_R0025	0	0	0.905681	1.63733	0	-0.614985	-0.791459
15	93125	93793	93383	0	6.53484	5.78969	6.90544	6.01669	4.80518	4.49373	0	-0.174667	0.0795816	0	-0.324379	-0.421056	Synpcc7942_0095	0	0	-0.0216368	-0.101974	0	0.339898	0.106137
16	100001	100249	100137	6.26408e-95	1.98751	3.30728	4.26197	3.31084	2.66365	4.60479	0	0.734687	1.10056	0	-0.31379	0.475941	Synpcc7942_0098	0	0	-0.270396	0.228329	0	-0.157837	-0.15301
17	101003	101479	101135	0	7.82934	9.05634	6.66294	6.44676	7.73746	9.76827	0	0.210039	-0.232731	0	0.263286	0.599529	Synpcc7942_0100	Dusk	0	-3.06446	-3.39703	0	2.02502	3.88725
17	101003	101479	101135	0	7.82934	9.05634	6.66294	6.44676	7.73746	9.76827	0	0.210039	-0.232731	0	0.263286	0.599529	Synpcc7942_0101	Dawn	0	0.646442	0.118406	0	-0.266018	-0.0660306
18	113089	113443	113236	1.15255e-103	2.04555	1.49824	3.35556	3.89978	1.87894	0.987355	0	-0.449224	0.71406	0	-1.05348	-1.98175	Synpcc7942_0114	Dawn	0	0.412346	0.82224	0	-0.437077	-1.08732
19	116791	117172	116900	0	5.24803	5.17094	5.03609	7.13553	3.57887	2.48608	0	-0.0213476	-0.0594711	0	-0.995516	-1.52115	Synpcc7942_0118	0	0	0.0616158	0.244019	0	-0.0199844	-0.144277
20	119092	119450	119282	0	6.19031	0.800158	0.991218	1.97301	5.11198	6.84749	0	-2.95165	-2.64274	0	1.37349	1.79518		0	0	0	0	0	0	0
21	121109	121540	121303	0	4.72055	6.69741	7.29577	6.19819	5.33572	4.76615	0	0.504649	0.628106	0	-0.216164	-0.379022		0	0	0	0	0	0	0
22	126049	126421	126189	1.99677e-156	2.11005	2.75415	4.37499	4.82586	3.32069	3.12851	0	0.38433	1.052	0	-0.539305	-0.625311	Synpcc7942_0126	0	0	0.906821	1.31915	0	-1.17127	-1.71703
22	126049	126421	126189	1.99677e-156	2.11005	2.75415	4.37499	4.82586	3.32069	3.12851	0	0.38433	1.052	0	-0.539305	-0.625311	Synpcc7942_0127	0	0	0.203594	-1.01003	0	-0.776262	-1.33625
23	139932	140501	140149	0	5.34502	3.77714	4.11977	4.40705	7.65355	8.03897	0	-0.500899	-0.375632	0	0.796314	0.867196	Synpcc7942_0139	0	0	-0.533582	-0.542504	0	0.872525	0.954504
24	141364	141926	141645	2.13047e-290	3.95822	0.933974	2.70964	2.63804	3.61114	4.55372	0	-2.0834	-0.546755	0	0.452988	0.78758		0	0	0	0	0	0	0
25	145799	146298	146059	0	4.66509	4.21692	7.4413	6.14833	5.53486	5.30918	0	-0.145716	0.673649	0	-0.151649	-0.211707	Synpcc7942_0143	0	0	0.061674	0.460107	0	0.306648	0.308685
26	156119	156521	156252	0	6.12439	4.48929	4.38754	4.2833	4.84063	5.96908	0	-0.44808	-0.481156	0	0.176475	0.478788	Synpcc7942_0152	0	0	0.843925	0.796135	0	-0.787166	-0.489647
27	159340	159773	159576	0	7.76216	1.47746	3.86597	4.65248	5.66236	10.5552	0	-2.39333	-1.00563	0	0.283403	1.18189	Synpcc7942_0157	0	0	-1.41643	-1.41197	0	1.55366	1.18944
28	160946	161427	161193	0	1.7979	6.17858	4.96841	4.50572	3.18593	2.30475	0	1.78096	1.46647	0	-0.500043	-0.967149	Synpcc7942_0158	0	0	0.968326	1.09124	0	-0.628653	-0.807273
29	163278	163609	163444	1.05986e-284	3.4302	2.21979	3.52073	4.58116	3.85435	2.56332	0	-0.627871	0.0375789	0	-0.249226	-0.8377		0	0	0	0	0	0	0
30	164371	164785	164586	1.7869e-162	2.45702	2.01111	2.9928	3.33255	3.087	3.58598	0	-0.288914	0.284586	0	-0.11042	0.105742	Synpcc7942_0165	Dusk	0	0.453289	0.117198	0	0.0502138	0.552495
31	166313	166816	166556	0	7.68974	10.469	11.8834	7.41565	6.20065	6.95348	0	0.44512	0.62794	0	-0.258155	-0.0928397		0	0	0	0	0	0	0
32	170633	171070	170792	0	5.01652	2.95992	5.6273	3.72505	4.49987	7.15462	0	-0.76113	0.165756	0	0.272624	0.941616		0	0	0	0	0	0	0
33	179210	180364	179844	0	3.95021	1.74193	1.80364	2.75284	8.33939	5.70166	0	-1.18124	-1.13102	0	1.59902	1.05046	Synpcc7942_0181	0	0	-0.710129	-0.805943	0	1.78603	1.89212
34	188938	189394	189265	2.20653e-268	3.35158	3.06974	4.53095	4.27812	1.29108	2.20717	0	-0.126728	0.434971	0	-1.7284	-0.954783	Synpcc7942_0189	0	0	0.470651	0.520968	0	-0.0260873	-0.0753915
35	192278	192595	192395	0	1.95946	1.25548	0.635917	1.72971	4.9514	5.30942	0	-0.642219	-1.62355	0	1.51731	1.61803	Synpcc7942_0192	0	0	-0.43416	-0.838891	0	1.17548	1.19097
36	198687	199094	198924	7.51718e-239	1.04194	4.50975	2.32114	1.53228	0.34187	0.146865	0	2.11377	1.15556	0	-2.16416	-3.38312		0	0	0	0	0	0	0
37	203864	204195	204009	3.25862e-100	2.99029	1.08617	1.10314	2.11142	3.77823	3.9921	0	-1.46104	-1.43867	0	0.8395	0.918936		0	0	0	0	0	0	0
38	205978	206442	206284	0	4.22215	2.92972	2.5078	3.18745	3.7685	5.47554	0	-0.527217	-0.751556	0	0.241587	0.780598		0	0	0	0	0	0	0
39	217660	217999	217818	0	4.72607	0.596918	0.703225	1.3778	1.98643	5.16812	0	-2.98504	-2.74858	0	0.527809	1.90727	Synpcc7942_0215	Dusk	0	-3.6805	-2.32503	0	2.72454	2.77374
40	218937	219382	219141	9.92664070000000e-316	4.3522	4.102	5.64142	3.87844	2.29542	2.09149	0	-0.0854187	0.374312	0	-0.75672	-0.890947		0	0	0	0	0	0	0
41	219705	220261	219914	0	7.36096	8.39809	7.73476	6.78584	5.39016	4.83324	0	0.190167	0.0714626	0	-0.332201	-0.489537	Synpcc7942_R0029	0	0	2.51068	1.35647	0	-0.757589	-0.834528
42	223828	224426	224010	0	6.33822	5.95491	10.3146	9.58459	6.07751	6.8805	0	-0.0899981	0.702534	0	-0.657237	-0.478202	Synpcc7942_0224	0	0	-0.414466	-0.526522	0	0.460826	0.483782
42	223828	224426	224010	0	6.33822	5.95491	10.3146	9.58459	6.07751	6.8805	0	-0.0899981	0.702534	0	-0.657237	-0.478202	Synpcc7942_0225	0	0	0.0682568	0.0850687	0	0.217392	-0.306094
43	231752	232766	232209	0	0.749247	0.669249	0.635523	1.29294	5.32111	5.87692	0	-0.162899	-0.237498	0	2.04107	2.18441		0	0	0	0	0	0	0
44	238240	238719	238561	0	0.472263	8.54283	1.35694	0.694783	0.384329	0.529497	0	4.17705	1.52269	0	-0.854221	-0.39194	Synpcc7942_0243	Dusk	0	4.14025	0.992273	0	0.896476	1.16134
45	242045	242479	242329	0	3.07466	0.243699	0.756577	2.22897	1.9339	5.25823	0	-3.65725	-2.02287	0	-0.204861	1.2382	Synpcc7942_0245	Dusk	0	-2.11652	-1.87915	0	2.05864	2.86441
45	242045	242479	242329	0	3.07466	0.243699	0.756577	2.22897	1.9339	5.25823	0	-3.65725	-2.02287	0	-0.204861	1.2382	Synpcc7942_0246	0	0	-0.457301	-0.273803	0	-0.290111	-0.301065
46	258262	258600	258437	8.85945e-287	3.22758	3.16179	5.57125	5.75195	2.92097	2.60482	0	-0.0297093	0.787549	0	-0.977602	-1.14287	Synpcc7942_0260	0	0	0.116075	-0.0671411	0	0.754579	0.240885
47	259038	259580	259191	0	4.26814	4.99046	4.81183	4.2654	3.30968	2.09363	0	0.225566	0.17298	0	-0.365989	-1.02668	Synpcc7942_0262	0	0	0.329942	0.553009	0	-0.0678837	-0.298297
48	263052	263570	263388	0	4.24577	0.463658	1.09442	1.95827	9.94306	11.147	0	-3.19489	-1.95585	0	2.34411	2.50901	Synpcc7942_0267	Dusk	0	-2.52876	-2.20207	0	3.30106	3.5027
49	279298	279673	279525	0	7.63939	6.01096	5.61702	6.78919	6.52023	6.5254	0	-0.345862	-0.443654	0	-0.0583171	-0.0571724	Synpcc7942_0282	0	0	0.869545	0.744013	0	-0.793171	-0.480779
50	280542	281199	280679	0	3.05864	3.42777	4.84814	4.27445	3.16587	2.44631	0	0.164378	0.664539	0	-0.433135	-0.805131	Synpcc7942_0284	Dawn	0	0.362745	0.707876	0	-0.0974421	-0.857517
51	283932	284321	284014	5.557e-220	2.60027	2.006	4.88169	3.47507	3.38156	2.46403	0	-0.374335	0.908722	0	-0.0393514	-0.496024	Synpcc7942_0289	0	0	0.137049	0.37039	0	0.25133	-0.331376
52	288091	288614	288176	0	4.23999	6.35637	8.33772	5.93059	5.66105	3.62418	0	0.584142	0.975591	0	-0.0671044	-0.710519	Synpcc7942_0291	Dusk	0	-0.92851	-0.590681	0	1.41914	0.823183
53	290063	290687	290296	0	2.69978	3.48137	5.52365	6.46425	3.17969	2.9206	0	0.366813	1.03278	0	-1.0236	-1.14622	Synpcc7942_0293	Dusk	0	-0.644516	-0.141768	0	-0.514956	-0.402986
53	290063	290687	290296	0	2.69978	3.48137	5.52365	6.46425	3.17969	2.9206	0	0.366813	1.03278	0	-1.0236	-1.14622	Synpcc7942_0294	Dawn	0	-1.38533	0.0361902	0	0.0800036	-1.16662
54	294699	294988	294829	6.6079e-257	2.90355	5.07069	4.07849	3.26489	2.87543	2.38839	0	0.804362	0.490217	0	-0.183255	-0.450996	Synpcc7942_0297	0	0	1.39848	0.274383	0	-0.252408	-0.164227
55	299354	299689	299565	6.00539e-124	2.10081	1.48523	3.91293	3.44234	1.84778	2.19018	0	-0.500251	0.897305	0	-0.897599	-0.65234	Synpcc7942_0300	Dawn	0	0.087702	0.318531	0	-0.754374	-0.936076
55	299354	299689	299565	6.00539e-124	2.10081	1.48523	3.91293	3.44234	1.84778	2.19018	0	-0.500251	0.897305	0	-0.897599	-0.65234	Synpcc7942_0301	0	0	-0.648748	-0.417817	0	0.727575	0.678696
56	303616	304280	303776	0	5.51119	3.64783	2.83368	4.12238	4.65676	4.0917	0	-0.595329	-0.959691	0	0.175848	-0.0107775	Synpcc7942_0305	Dusk	0	-0.746692	-0.791985	0	1.01102	1.36905
57	308948	309362	309108	0	5.85084	1.61255	2.57674	5.10966	11.0117	9.96487	0	-1.8593	-1.18309	0	1.10774	0.963625	Synpcc7942_0309	Dusk	0	-1.18352	-1.3025	0	1.47161	1.3768
58	313992	314900	314439	0	5.53687	4.1405	5.09163	6.37862	4.38363	5.22103	0	-0.419266	-0.120943	0	-0.541116	-0.28891	Synpcc7942_0315	0	0	-0.318516	-0.0107189	0	1.10583	0.621461
58	313992	314900	314439	0	5.53687	4.1405	5.09163	6.37862	4.38363	5.22103	0	-0.419266	-0.120943	0	-0.541116	-0.28891	Synpcc7942_0317	0	0	-0.524825	-0.748441	0	0.90103	0.567445
59	318318	318800	318562	0	4.86043	3.87476	2.32321	4.10216	9.19111	6.91446	0	-0.326974	-1.06497	0	1.16385	0.753231	Synpcc7942_0321	0	0	-0.751634	-1.05842	0	0.984173	1.05081
60	321943	322451	322185	0	3.7695	1.35453	2.94177	2.59685	4.62041	1.93948	0	-1.47658	-0.357687	0	0.831259	-0.421091	Synpcc7942_0324	0	0	-1.28951	-0.903494	0	1.48227	1.05292
61	323087	323820	323522	0	3.72474	1.36495	3.17066	5.45514	4.97763	2.8158	0	-1.44829	-0.232358	0	-0.132158	-0.954073	Synpcc7942_0327	0	0	-2.02077	-0.83942	0	0.230674	-0.694578
62	325750	326102	325952	8.88227e-250	4.63008	1.4485	2.42691	3.26227	2.75498	1.96169	0	-1.67647	-0.931914	0	-0.243835	-0.733774	Synpcc7942_0328	0	0	-2.52943	-1.00185	0	0.200384	-0.374294
63	327217	327899	327388	0	2.90216	3.25775	6.66348	4.51814	1.82984	0.839604	0	0.166749	1.19915	0	-1.30401	-2.42795	Synpcc7942_0330	0	0	0.319623	1.07854	0	-0.795041	-2.05234
64	327869	331142	328271	0	3.29741	4.39951	8.41663	4.92342	2.06692	1.73681	0	0.41601	1.35191	0	-1.25218	-1.50322		0	0	0	0	0	0	0
65	329403	329709	329463	3.66135e-299	1.25171	4.72661	2.37007	2.95509	1.6131	0.9964	0	1.9169	0.921028	0	-0.873363	-1.56841	Synpcc7942_0334	Dawn	0	0.677425	1.26526	0	-1.39437	-2.31102
66	332555	332560	332694	4.25938e-145	0.109811	4.65363	1.53362	1.34916	0.0446157	0.0250024	0	5.40526	3.80384	0	-4.91837	-5.75385		0	0	0	0	0	0	0
67	339973	340944	340192	0	6.711	6.33623	7.68669	5.99591	5.26437	5.85464	0	-0.0829038	0.195835	0	-0.187719	-0.0343982	Synpcc7942_0347	0	0	0.927585	1.09968	0	-0.300973	-0.726191
68	348786	349343	349226	1.01474e-164	3.44023	2.72696	3.89778	2.82586	2.47331	3.36849	0	-0.33521	0.180148	0	-0.192247	0.253414	Synpcc7942_0356	0	0	-0.460447	-0.20429	0	0.734282	0.688443
69	354180	355015	354525	0	7.11205	5.15491	3.25683	7.26608	3.92264	6.44248	0	-0.464318	-1.1268	0	-0.889352	-0.173561	Synpcc7942_0361	0	0	-0.359893	-0.414494	0	0.0297059	-0.240934
70	371695	372829	372336	0	3.50434	3.97244	4.59468	5.33083	4.34374	3.85391	0	0.180879	0.390819	0	-0.295423	-0.468037	Synpcc7942_0377	Dusk	0	-1.73348	-1.76988	0	1.40414	1.51886
70	371695	372829	372336	0	3.50434	3.97244	4.59468	5.33083	4.34374	3.85391	0	0.180879	0.390819	0	-0.295423	-0.468037	Synpcc7942_0378	Dusk	0	-0.562694	-0.884742	0	0.196247	0.881921
71	378369	378738	378547	0	2.69891	1.57453	1.98239	2.79679	6.70246	3.77932	0	-0.777452	-0.445133	0	1.26092	0.434355		0	0	0	0	0	0	0
72	388089	388677	388200	0	3.52098	3.57952	3.46426	3.07297	3.11741	7.18602	0	0.0237914	-0.0234271	0	0.0207149	1.22556	Synpcc7942_0395	0	0	0.656535	0.733156	0	0.320641	-0.0806031
73	398132	398433	398276	1.44735e-295	4.3346	2.75392	4.21174	6.88287	3.35953	4.0045	0	-0.654411	-0.0414807	0	-1.03475	-0.781388		0	0	0	0	0	0	0
74	399805	400403	400097	0	2.39346	0.31578	1.22588	3.7024	4.30069	3.04378	0	-2.92211	-0.965283	0	0.216109	-0.282594		0	0	0	0	0	0	0
75	403448	404107	403569	0	4.85118	7.3396	5.06711	4.82542	3.45577	2.18046	0	0.597368	0.0628297	0	-0.481649	-1.14602	Synpcc7942_0412	0	0	-0.0462421	0.218908	0	-0.12373	-0.395697
76	404916	405331	405071	0	3.19109	1.40656	1.23431	1.60052	7.72637	5.58045	0	-1.18188	-1.37034	0	2.27125	1.80184		0	0	0	0	0	0	0
77	405927	408189	406374	0	7.65627	0.593885	2.20938	5.08845	12.5238	9.01065	0	-3.68839	-1.793	0	1.29937	0.824406	Synpcc7942_0415	0	0	-3.64513	-1.89382	0	2.54487	1.79298
77	405927	408189	406374	0	7.65627	0.593885	2.20938	5.08845	12.5238	9.01065	0	-3.68839	-1.793	0	1.29937	0.824406	Synpcc7942_0416	0	0	-3.50616	-2.94661	0	2.34818	2.05289
78	408406	408678	408516	1.73463e-146	1.40447	0.232563	0.645239	1.30724	3.84121	2.8618	0	-2.59433	-1.12212	0	1.55504	1.1304		0	0	0	0	0	0	0
79	413184	414365	413960	0	6.25824	0.693325	2.30481	4.08982	5.46255	6.39049	0	-3.17415	-1.44111	0	0.417539	0.64389	Synpcc7942_0423	Dusk	0	-1.42062	-1.34165	0	1.64887	2.06014
80	423440	423984	423655	0	5.37948	1.17335	1.49007	2.68091	9.56274	7.18975	0	-2.19683	-1.85209	0	1.8347	1.42322		0	0	0	0	0	0	0
81	436697	437074	436912	0	5.66804	4.71265	5.90236	5.05117	2.63027	2.19436	0	-0.26631	0.0584405	0	-0.941405	-1.20282	Synpcc7942_0446	0	0	0.659405	0.92444	0	-0.568569	-0.986319
82	441162	442117	441870	0	12.3703	4.60173	6.01591	7.7173	10.3535	8.94843	0	-1.42663	-1.04003	0	0.423947	0.213538	Synpcc7942_0452	0	0	-1.60093	-1.13764	0	1.25737	0.791798
83	443039	443309	443210	3.33555e-179	5.55711	2.49929	5.08951	3.39557	2.65061	2.61325	0	-1.15282	-0.126808	0	-0.35733	-0.377811		0	0	0	0	0	0	0
84	445009	445616	445156	0	5.40323	4.25465	6.07287	5.48969	10.9916	6.0315	0	-0.344781	0.168556	0	1.00161	0.13579	Synpcc7942_0456	0	0	-2.04664	-0.77857	0	1.17908	0.498695
85	448343	448838	448454	0	3.77319	7.23477	6.64681	6.75345	3.64424	3.27692	0	0.939161	0.816876	0	-0.890006	-1.04328		0	0	0	0	0	0	0
86	456506	456822	456743	0	3.87053	4.92327	5.44584	5.51658	6.12533	4.47706	0	0.347087	0.492623	0	0.151012	-0.301224	Synpcc7942_0469	Dawn	0	-0.179918	0.190608	0	0.187831	-0.315693
86	456506	456822	456743	0	3.87053	4.92327	5.44584	5.51658	6.12533	4.47706	0	0.347087	0.492623	0	0.151012	-0.301224	Synpcc7942_0470	0	0	-1.63215	-1.90607	0	0.650248	0.652962
87	460255	460849	460594	2.9545e-276	4.59369	1.88527	3.84859	2.84927	3.49439	4.15123	0	-1.28488	-0.255323	0	0.294451	0.542949	Synpcc7942_0475	0	0	-0.750773	-0.59934	0	0.614777	0.414538
88	491567	491842	491593	9.28241e-208	1.46355	1.66615	1.38457	0.750099	4.00461	1.07053	0	0.187046	-0.0800366	0	2.41651	0.513175		0	0	0	0	0	0	0
89	492741	493188	492965	3.96302e-308	2.53458	5.45554	7.23487	4.10394	2.90626	2.68172	0	1.10598	1.51322	0	-0.497846	-0.613849	Synpcc7942_0505	Dawn	0	0.49974	1.28917	0	-0.8845	-2.1828
89	492741	493188	492965	3.96302e-308	2.53458	5.45554	7.23487	4.10394	2.90626	2.68172	0	1.10598	1.51322	0	-0.497846	-0.613849	Synpcc7942_0506	Dawn	0	0.352693	0.669826	0	-0.890661	-1.32171
90	513231	513672	513460	0	3.50629	5.69058	7.31047	7.6697	3.27823	7.22263	0	0.698629	1.06002	0	-1.22625	-0.0866461	Synpcc7942_0529	Dusk	0	-0.125346	-0.256343	0	0.596373	1.27893
91	518669	520414	519321	0	7.92364	0.792097	2.85676	4.7978	6.91129	5.49302	0	-3.32241	-1.47178	0	0.526582	0.195226	Synpcc7942_0536	0	0	0.647454	1.10586	0	-0.471928	-1.03469
92	531824	532130	532038	7.48506e-206	1.52484	5.1388	2.31174	2.2305	2.16278	1.6686	0	1.75278	0.600327	0	-0.0444768	-0.418725		0	0	0	0	0	0	0
93	533356	534077	533504	0	10.1533	0.53333	1.8756	3.71243	5.05616	3.81322	0	-4.25078	-2.43653	0	0.44568	0.0386482	Synpcc7942_0551	Dusk	0	-2.99864	-2.37359	0	1.50189	1.18244
94	536407	536877	536611	1.13417e-250	4.11496	4.19126	6.69426	5.9551	2.72203	2.01233	0	0.0265065	0.702046	0	-1.12944	-1.56526		0	0	0	0	0	0	0
95	538890	539487	539225	0	1.65161	2.2476	1.68344	2.48729	3.75238	3.23409	0	0.444511	0.0275333	0	0.59323	0.378786	Synpcc7942_0556	Dusk	0	-0.812798	-1.23424	0	1.10419	1.31193
95	538890	539487	539225	0	1.65161	2.2476	1.68344	2.48729	3.75238	3.23409	0	0.444511	0.0275333	0	0.59323	0.378786	Synpcc7942_0557	0	0	-0.982906	-1.4991	0	0.966125	1.00175
96	541795	542088	541904	1.10512e-150	3.33559	2.57471	3.47516	2.83776	2.27499	4.18237	0	-0.373531	0.0591406	0	-0.318893	0.559567	Synpcc7942_0561	0	0	0.453877	0.174901	0	-0.42916	-0.205625
97	546409	546740	546599	9.10067e-283	4.71934	2.49384	3.24918	4.93862	5.67321	4.74702	0	-0.920217	-0.538511	0	0.200057	-0.0570853		0	0	0	0	0	0	0
98	551340	551993	551639	0	4.41312	2.85927	2.42207	4.12921	6.75085	4.8091	0	-0.626151	-0.865559	0	0.709203	0.219902		0	0	0	0	0	0	0
99	554729	555457	555246	0	4.21346	5.2179	6.67626	5.17367	3.14423	4.28661	0	0.308462	0.664035	0	-0.718483	-0.271351	Synpcc7942_0572	0	0	-1.11774	-1.02301	0	1.03629	2.05216
100	556880	557290	557032	0	1.31052	6.0936	1.80492	1.59474	0.830198	0.648245	0	2.21716	0.461798	0	-0.941796	-1.29871	Synpcc7942_0575	0	0	-0.769637	-0.44646	0	0.176343	0.0548596
101	558168	558644	558329	1.10364e-165	2.33737	3.07983	3.41257	4.73542	3.61785	2.10858	0	0.397961	0.545973	0	-0.38836	-1.16722	Synpcc7942_0578	Dawn	0	-0.569017	-0.0309152	0	-0.0765439	-0.813889
102	563932	564315	564090	0	4.51739	5.58118	3.88171	4.23777	2.91875	3.01588	0	0.30508	-0.218797	0	-0.537952	-0.490725	Synpcc7942_0583	0	0	0.922672	1.28908	0	-1.06196	-1.35793
103	568188	568490	568291	0	5.79946	5.93081	7.64304	5.97751	3.42363	4.57648	0	0.0323112	0.398229	0	-0.804017	-0.385307		0	0	0	0	0	0	0
104	577764	578273	578131	0	5.11866	2.9296	4.68603	3.83623	4.24816	2.96187	0	-0.805062	-0.1274	0	0.14715	-0.373179	Synpcc7942_0588	0	0	-0.132657	1.18459	0	-1.37475	-1.5042
104	577764	578273	578131	0	5.11866	2.9296	4.68603	3.83623	4.24816	2.96187	0	-0.805062	-0.1274	0	0.14715	-0.373179	Synpcc7942_0590	Dusk	0	0.657293	-0.337423	0	-0.353062	0.459608
105	582119	582444	582232	0	4.14341	6.62829	4.18505	4.51691	3.71237	2.21017	0	0.677817	0.0144264	0	-0.282993	-1.03118		0	0	0	0	0	0	0
106	585529	586010	585723	0	2.68431	7.917	5.3616	5.3713	2.02719	3.78072	0	1.5604	0.99811	0	-1.40579	-0.50661		0	0	0	0	0	0	0
107	587296	587991	587658	0	16.883	14.9301	12.933	9.8531	9.8356	10.1919	0	-0.177347	-0.38451	0	-0.00256375	0.0487737		0	0	0	0	0	0	0
108	592731	593128	592927	5.44325e-205	1.88187	3.78625	4.12576	5.17046	2.14786	1.63942	0	1.0086	1.13249	0	-1.26739	-1.6571	Synpcc7942_0603	Dawn	0	-0.650064	-0.104633	0	0.24798	-0.94964
109	595225	595595	595348	0	3.77388	0.169327	1.66563	3.30047	6.25623	8.69479	0	-4.47816	-1.17998	0	0.922623	1.39748	Synpcc7942_0607	0	0	-2.93056	-1.96348	0	2.10939	2.01608
110	620190	620680	620414	0	5.92141	11.4277	7.49347	4.86687	2.44431	3.541	0	0.948525	0.339695	0	-0.993571	-0.45884		0	0	0	0	0	0	0
111	623472	624232	623680	0	5.15462	5.59239	6.35693	5.58882	3.70098	3.84331	0	0.1176	0.302466	0	-0.594635	-0.540194		0	0	0	0	0	0	0
112	624766	625473	625370	0	8.97944	8.7478	6.38404	6.62909	6.19564	4.48694	0	-0.0377052	-0.492156	0	-0.0975584	-0.563082		0	0	0	0	0	0	0
113	626888	627466	627256	0	10.5205	10.3933	10.0984	7.26213	6.6149	6.46938	0	-0.0175446	-0.0590776	0	-0.134674	-0.166767	Synpcc7942_0636	0	0	1.0739	1.62004	0	-0.385233	-0.702299
114	639229	639818	639417	0	5.00858	2.53626	4.43735	4.89758	5.80415	3.4003	0	-0.981701	-0.174703	0	0.245015	-0.526407		0	0	0	0	0	0	0
115	643808	644279	644005	0	4.26483	2.26964	3.44363	3.83935	3.19954	5.44531	0	-0.910027	-0.30856	0	-0.262997	0.504153	Synpcc7942_0649	Dusk	0	0.0919151	-0.411047	0	-0.760137	0.20418
116	645055	645332	645221	0	4.29587	5.22267	4.10162	9.14811	1.28389	2.10843	0	0.281837	-0.0667555	0	-2.83296	-2.1173		0	0	0	0	0	0	0
117	653040	653832	653384	0	4.48401	2.02256	3.00386	3.68884	3.73626	6.48169	0	-1.14861	-0.577971	0	0.018428	0.813202		0	0	0	0	0	0	0
118	663740	664125	663937	0	5.44418	3.28456	4.02609	4.24427	5.39611	6.48219	0	-0.729014	-0.435335	0	0.346405	0.610966	Synpcc7942_0667	0	0	-0.850004	-0.943871	0	0.89217	0.912761
119	664173	664561	664266	2.26698e-284	2.49258	1.61198	1.3059	2.48236	3.82805	2.34681	0	-0.628806	-0.932599	0	0.624898	-0.081009		0	0	0	0	0	0	0
120	666809	667105	666952	4.66939e-301	1.06438	5.69344	1.80767	0.708565	0.45392	0.185103	0	2.41929	0.76412	0	-0.642462	-1.93657		0	0	0	0	0	0	0
121	671898	672793	672584	0	3.71455	1.21068	1.83659	3.73206	5.56243	6.18544	0	-1.61737	-1.01616	0	0.575742	0.728902	Synpcc7942_0677	Dusk	0	-1.33188	-1.53233	0	1.28424	2.14795
122	673257	673974	673677	0	10.3831	5.3506	5.05817	8.7395	9.46935	9.65596	0	-0.956469	-1.03755	0	0.115716	0.143871	Synpcc7942_0679	0	0	-0.416101	-0.139025	0	-0.112063	0.410692
123	675791	676055	675919	7.65862e-277	1.59998	6.13929	3.64042	2.51753	1.86482	1.60933	0	1.94002	1.18605	0	-0.432976	-0.645553	Synpcc7942_0682	0	0	0.309761	0.722753	0	-0.413916	-0.98894
124	678697	679019	678855	0	1.03025	8.57702	4.09528	1.42612	1.3942	0.197867	0	3.05748	1.99097	0	-0.0326565	-2.84949	Synpcc7942_0685	0	0	2.7932	1.71968	0	-2.22994	-3.25946
125	680537	681299	680669	0	7.07075	3.56519	1.82406	4.97391	8.17554	6.1211	0	-0.987883	-1.95471	0	0.716934	0.299412	Synpcc7942_0686	Dusk	0	0.138343	-1.2822	0	1.53718	1.69468
126	685096	685385	685286	0	4.31281	3.74923	3.92086	2.79897	3.65427	5.11598	0	-0.202034	-0.137459	0	0.384685	0.870114	Synpcc7942_0690	0	0	0.994427	0.340242	0	-0.737203	0.129451
127	687896	688349	688113	0	6.34242	5.93381	7.38938	5.08	3.98923	4.39593	0	-0.0960741	0.220421	0	-0.34872	-0.208662	Synpcc7942_0694	0	0	1.23769	1.4103	0	-0.906361	-0.884556
128	688730	689079	688921	0	4.12071	2.14337	3.1179	3.50023	2.46621	3.54699	0	-0.943012	-0.402317	0	-0.505153	0.0191427	Synpcc7942_0695	0	0	-0.580364	-0.569887	0	0.910536	0.664003
129	690688	691097	690883	0	5.9296	4.26379	5.47928	6.35062	2.98491	3.67124	0	-0.4758	-0.113948	0	-1.08921	-0.790629	Synpcc7942_0697	Dawn	0	-0.659925	0.263301	0	0.209874	-0.590264
129	690688	691097	690883	0	5.9296	4.26379	5.47928	6.35062	2.98491	3.67124	0	-0.4758	-0.113948	0	-1.08921	-0.790629	Synpcc7942_0698	0	0	1.8059	1.25109	0	-0.130441	-0.378146
130	691480	691829	691650	1.75987e-222	3.59115	3.06893	4.05891	3.07578	2.38049	1.62032	0	-0.22671	0.176644	0	-0.369698	-0.924678		0	0	0	0	0	0	0
131	692510	692828	692775	2.70677e-199	3.27886	2.19762	2.70655	4.74163	4.29842	3.32234	0	-0.577255	-0.276739	0	-0.141575	-0.513181	Synpcc7942_0700	0	0	-1.57701	-1.14787	0	1.57119	1.20135
132	701393	701736	701529	0	3.8288	3.96285	6.48617	5.9478	5.76452	3.12114	0	0.049648	0.760476	0	-0.0451552	-0.930285		0	0	0	0	0	0	0
133	709420	710077	709626	0	7.20884	13.4966	11.5543	6.53575	3.17027	6.29451	0	0.904756	0.680587	0	-1.04375	-0.0542589	Synpcc7942_0715	0	0	-1.10842	-0.973329	0	-0.418518	-0.565315
134	711033	711578	711202	0	7.04729	9.07198	7.73356	5.46685	4.90964	4.98644	0	0.364349	0.134064	0	-0.155091	-0.132698	Synpcc7942_R0040	0	0	-1.03414	-0.829204	0	-1.11903	-0.717957
135	722970	723537	723126	0	4.80378	11.3949	7.1028	7.3031	18.1623	11.057	0	1.24614	0.564217	0	1.31437	0.598384	Synpcc7942_0728	0	0	0.677065	-0.627123	0	0.461407	0.766314
136	751906	753683	752520	0	4.85821	1.89326	1.87618	3.69934	8.72074	4.16443	0	-1.35955	-1.37263	0	1.23718	0.17085	Synpcc7942_0759	0	0	-0.650502	-0.980615	0	1.11834	1.39982
137	759927	760781	760217	0	8.50009	0.283067	0.800049	1.57359	9.4868	15.332	0	-4.90826	-3.40932	0	2.59186	3.28441	Synpcc7942_0768	Dusk	0	-3.36853	-3.08527	0	2.92485	3.93452
138	765825	766450	766210	0	6.51553	5.82967	5.76043	6.79035	4.00861	2.96961	0	-0.160468	-0.177706	0	-0.760386	-1.19321	Synpcc7942_0773	0	0	0.279168	0.0797433	0	0.0961784	-0.0678803
139	770004	770295	770128	9.80882e-107	3.03155	3.19787	2.83595	4.14723	2.43211	3.09604	0	0.0770533	-0.0962248	0	-0.769942	-0.421726		0	0	0	0	0	0	0
140	773726	774037	773916	4.82639e-156	4.2114	2.32518	1.12153	1.37909	4.81832	3.52516	0	-0.856959	-1.90883	0	1.80482	1.35397		0	0	0	0	0	0	0
141	785656	786104	785930	0	3.34811	7.02855	6.21017	4.7551	2.74895	2.43139	0	1.06988	0.891287	0	-0.790594	-0.967697	Synpcc7942_0790	0	0	0.890476	0.487364	0	-1.65823	-1.20438
142	790065	790442	790288	2.51763e-294	2.93501	2.36142	3.33934	4.43082	2.16785	2.36714	0	-0.31371	0.1862	0	-1.03131	-0.904431	Synpcc7942_0794	Dusk	0	-0.0827324	-0.468458	0	0.332152	0.390728
143	791795	792271	791998	1.59073e-305	5.2484	0.645365	1.23678	4.71235	1.3169	1.49254	0	-3.02369	-2.08529	0	-1.83929	-1.65867	Synpcc7942_0797	Dusk	0	-2.20508	-2.13677	0	0.845978	0.484529
144	806741	807094	806831	1.42700000000000e-320	5.5529	3.68602	3.10431	3.80092	3.025	3.98674	0	-0.591177	-0.838972	0	-0.329414	0.0688604	Synpcc7942_0812	0	0	-0.245816	-0.538704	0	0.317699	0.457499
145	812753	813088	812942	7.18534e-188	2.95495	1.71089	3.26403	4.41911	2.93234	1.4094	0	-0.788387	0.143524	0	-0.591702	-1.64867	Synpcc7942_0818	0	0	0.429872	0.803676	0	-0.31887	-0.91524
146	823174	823740	823347	0	4.60619	5.89687	6.56605	4.51188	4.24209	4.69437	0	0.356374	0.51145	0	-0.0889527	0.0572034	Synpcc7942_0828	Dusk	0	0.587605	-0.022298	0	0.388501	0.836703
146	823174	823740	823347	0	4.60619	5.89687	6.56605	4.51188	4.24209	4.69437	0	0.356374	0.51145	0	-0.0889527	0.0572034	Synpcc7942_0829	Dawn	0	2.69756	1.20168	0	-2.17792	-1.9533
147	828374	828823	828487	0	2.76253	1.71979	1.07661	1.45413	2.56594	5.42618	0	-0.683755	-1.35949	0	0.819335	1.89978	Synpcc7942_0834	Dusk	0	-0.740931	-2.70264	0	2.74335	5.96185
148	829327	829733	829486	0	4.25332	0.60563	0.484835	0.666174	10.3113	12.3571	0	-2.81208	-3.13303	0	3.95218	4.2133		0	0	0	0	0	0	0
149	830712	831169	830841	0	8.12587	0.440859	1.03394	2.8282	6.27433	5.25726	0	-4.20413	-2.97437	0	1.14958	0.894427		0	0	0	0	0	0	0
150	839514	840210	839780	0	2.72502	2.66874	2.49879	3.669	4.1854	3.51432	0	-0.0301098	-0.125036	0	0.189977	-0.0621427		0	0	0	0	0	0	0
151	842269	842582	842396	0	5.2699	4.59867	3.47078	1.25596	3.37831	7.45126	0	-0.196561	-0.602517	0	1.42751	2.56869	Synpcc7942_0847	0	0	0.154999	-0.285836	0	0.240202	-0.364957
152	846457	846890	846700	0	2.93584	3.64974	4.49235	5.55396	4.8876	3.19398	0	0.314021	0.613695	0	-0.184391	-0.798164	Synpcc7942_0850	Dawn	0	0.302738	0.827168	0	-0.106912	-1.39065
153	847094	847383	847229	5.00034e-180	1.59121	2.72381	4.85975	3.74655	2.3332	2.11689	0	0.775504	1.61076	0	-0.683252	-0.823612		0	0	0	0	0	0	0
154	848719	848986	848868	1.85633e-187	3.08561	4.56816	4.2903	3.00172	2.07941	0.52579	0	0.566058	0.475524	0	-0.52961	-2.51323	Synpcc7942_0853	Dawn	0	0.897896	1.35716	0	-0.892519	-1.65006
155	853334	853969	853639	0	1.25441	1.60743	1.55507	2.14467	6.01949	1.03523	0	0.357749	0.309976	0	1.48889	-1.0508		0	0	0	0	0	0	0
156	863509	864358	864088	0	6.63759	4.03223	2.74251	1.77113	5.09706	8.74577	0	-0.719082	-1.27516	0	1.525	2.30392		0	0	0	0	0	0	0
157	865195	865743	865565	0	3.53463	9.37279	4.74278	4.0447	3.74261	5.05662	0	1.40692	0.424174	0	-0.111987	0.322141	Synpcc7942_0861	Dawn	0	0.299014	0.509163	0	-0.461118	-0.241347
157	865195	865743	865565	0	3.53463	9.37279	4.74278	4.0447	3.74261	5.05662	0	1.40692	0.424174	0	-0.111987	0.322141	Synpcc7942_0862	Dusk	0	-0.542038	-0.712158	0	-0.261544	0.912976
158	867194	867964	867443	0	3.98688	4.01441	4.2073	3.77218	2.28155	1.0855	0	0.0099293	0.0776368	0	-0.725382	-1.79704		0	0	0	0	0	0	0
159	883398	884164	883575	0	3.08885	5.23761	5.18296	4.58214	3.95764	3.04988	0	0.761839	0.746708	0	-0.211381	-0.58727	Synpcc7942_0878	Dusk	0	1.47339	0.576126	0	-0.6851	-0.275569
160	887290	887649	887512	3.8974e-105	3.86203	0.881868	3.93141	3.94406	4.20673	2.09461	0	-2.13072	0.0256882	0	0.0930163	-0.913001		0	0	0	0	0	0	0
161	893955	894415	894207	0	9.77778	7.6027	7.68496	7.01635	6.1872	6.48947	0	-0.362996	-0.34747	0	-0.181433	-0.112618	Synpcc7942_0887	0	0	1.31153	1.6109	0	-0.872579	-1.41076
162	896449	896909	896614	0	3.33566	2.65278	5.42164	4.16719	3.92485	3.20511	0	-0.330468	0.700757	0	-0.0864365	-0.3787	Synpcc7942_0890	0	0	0.325795	0.370711	0	0.207378	-0.12051
163	902982	903342	903192	0	1.05592	5.7444	3.07045	1.94185	0.302112	0.526018	0	2.44365	1.53995	0	-2.68428	-1.88425		0	0	0	0	0	0	0
164	908171	908540	908317	0	6.69625	3.69865	5.64627	5.28575	6.20265	5.61998	0	-0.856357	-0.246055	0	0.230778	0.0884577	Synpcc7942_R0041	0	0	0.187683	0.72635	0	-0.309754	-0.245012
165	922582	923578	923091	0	6.45098	8.06861	6.34312	5.31681	4.44548	4.49658	0	0.322802	-0.0243255	0	-0.258223	-0.241735	Synpcc7942_0916	0	0	-0.608504	-0.708151	0	0.692603	0.488039
165	922582	923578	923091	0	6.45098	8.06861	6.34312	5.31681	4.44548	4.49658	0	0.322802	-0.0243255	0	-0.258223	-0.241735	Synpcc7942_R0042	0	0	-0.838115	0.546276	0	1.46112	0.35985
166	936281	936814	936607	7.92028e-288	2.92848	2.79437	4.47992	3.47702	2.87609	1.57291	0	-0.0676298	0.61332	0	-0.273741	-1.14442	Synpcc7942_0929	0	0	0.190631	0.395299	0	-0.278785	-0.890943
167	937672	938211	937853	1.34065e-182	2.83246	1.77954	4.01865	4.5287	3.95648	1.81977	0	-0.670553	0.504657	0	-0.194878	-1.31534	Synpcc7942_0930	0	0	0.452772	0.677394	0	-0.439658	-0.835194
168	949870	950450	950184	0	9.00607	13.9217	10.2384	11.232	8.50543	7.15723	0	0.628364	0.185028	0	-0.40116	-0.650142	Synpcc7942_0942	0	0	1.2374	0.0990983	0	0.516437	0.653564
168	949870	950450	950184	0	9.00607	13.9217	10.2384	11.232	8.50543	7.15723	0	0.628364	0.185028	0	-0.40116	-0.650142	Synpcc7942_0943	0	0	-0.1305	0.602968	0	0.170746	-0.275371
169	967407	967709	967631	9.9478e-142	4.0736	4.113	3.12615	3.65974	2.18744	2.96984	0	0.013888	-0.381918	0	-0.7425	-0.301358		0	0	0	0	0	0	0
170	973963	974251	974070	5.04016e-55	1.75431	1.58784	3.56255	3.15434	3.43834	2.73955	0	-0.14384	1.022	0	0.124376	-0.203396	Synpcc7942_0967	Dawn	0	0.250183	0.879337	0	-0.274557	-1.18968
171	985790	986836	986199	0	8.48382	10.0396	9.53704	9.233	8.72011	6.1964	0	0.242911	0.168828	0	-0.0824526	-0.575369	Synpcc7942_0977	0	0	-0.0264046	0.201303	0	-0.0582667	-0.591729
171	985790	986836	986199	0	8.48382	10.0396	9.53704	9.233	8.72011	6.1964	0	0.242911	0.168828	0	-0.0824526	-0.575369	Synpcc7942_0978	0	0	0.209349	0.763128	0	-0.368977	-1.13095
172	989117	989911	989732	0	6.78693	9.64553	6.31535	6.89146	4.42059	3.90694	0	0.507101	-0.103896	0	-0.640573	-0.818772	Synpcc7942_R0017	0	0	-0.340175	-0.439421	0	0.523532	0.883951
173	994934	995205	995122	1.39148e-188	2.47886	2.97555	6.44564	5.97799	2.9098	1.33999	0	0.263482	1.37865	0	-1.03874	-2.15744		0	0	0	0	0	0	0
174	997155	998059	997772	0	1.93356	2.49893	2.01496	2.58463	4.13295	5.18656	0	0.370048	0.0594888	0	0.677215	1.00482	Synpcc7942_0988	0	0	-0.318797	-0.192435	0	0.339609	0.696806
175	1005019	1005820	1005498	0	8.0224	10.8899	10.6296	8.14733	6.01076	4.80075	0	0.440879	0.405981	0	-0.438781	-0.763068	Synpcc7942_0997	0	0	0.709709	0.824677	0	-0.0156859	-0.417273
175	1005019	1005820	1005498	0	8.0224	10.8899	10.6296	8.14733	6.01076	4.80075	0	0.440879	0.405981	0	-0.438781	-0.763068	Synpcc7942_0998	0	0	0.128724	-0.2852	0	0.383977	0.54069
176	1007925	1008429	1008226	2.41485e-168	4.86813	3.49042	3.0899	4.17106	5.15749	2.38772	0	-0.479967	-0.655809	0	0.306257	-0.804781	Synpcc7942_0999	0	0	-0.227943	-0.335626	0	0.940085	0.067743
177	1013635	1014527	1013860	0	7.45842	1.90293	3.86882	6.63624	6.98185	6.15067	0	-1.97065	-0.946975	0	0.0732439	-0.109622	Synpcc7942_1002	0	0	-3.58648	-1.72326	0	0.9137	0.349799
178	1039585	1040290	1039901	0	3.05438	6.86077	7.99562	6.06139	6.5736	4.12806	0	1.16749	1.38833	0	0.117035	-0.554183		0	0	0	0	0	0	0
179	1050473	1050852	1050730	9.45469e-204	3.09584	2.22503	2.07019	4.93636	4.35187	2.69556	0	-0.476507	-0.580571	0	-0.181812	-0.872863	Synpcc7942_1036	0	0	-0.823502	-1.73422	0	0.53667	-0.00818043
180	1055417	1055730	1055635	2.05520400000000e-318	2.36619	1.64902	0.768669	1.54411	2.10107	5.42885	0	-0.520957	-1.62213	0	0.444351	1.81387	Synpcc7942_1042	Dusk	0	-3.90938	-3.27866	0	1.47177	1.06314
181	1059862	1060416	1060101	0	7.91373	2.27637	4.46752	6.56133	8.37175	3.81329	0	-1.79762	-0.824884	0	0.351542	-0.782952	Synpcc7942_1047	0	0	-3.04002	-1.80926	0	0.596519	-0.570541
182	1063501	1064155	1063880	0	5.66488	2.5677	2.71048	4.39193	4.98101	7.58048	0	-1.14157	-1.0635	0	0.181584	0.787433	Synpcc7942_1052	0	0	-2.50822	-1.74263	0	1.07077	0.279275
183	1079270	1079609	1079411	8.84653e-245	3.87958	5.25805	5.27906	5.05663	3.6178	1.10613	0	0.438628	0.444382	0	-0.483062	-2.19265	Synpcc7942_1068	Dawn	0	0.714038	1.12469	0	-1.09121	-1.7969
184	1101894	1102920	1102042	2.23000000000000e-321	2.07322	2.74488	5.59058	4.25613	5.62969	2.12644	0	0.404871	1.43112	0	0.403512	-1.0011	Synpcc7942_1086	Dawn	0	-0.000821349	0.749597	0	-0.463551	-1.29962
185	1103970	1104351	1104156	0	5.71449	4.03412	6.53498	6.00824	2.90652	3.38437	0	-0.502371	0.19356	0	-1.04765	-0.828056	Synpcc7942_1088	0	0	-0.25776	0.329551	0	0.505257	-0.538251
186	1108317	1108622	1108486	1.70974e-162	0.572051	3.27792	1.97204	3.62535	4.36388	2.41016	0	2.51857	1.78548	0	0.267489	-0.588994	Synpcc7942_1090	0	0	1.56817	0.655273	0	-0.92494	-1.07184
187	1109469	1110304	1109640	0	1.62785	0.0372832	0.178546	1.39112	4.8401	3.12297	0	-5.4483	-3.1886	0	1.79879	1.16667		0	0	0	0	0	0	0
188	1114684	1115009	1114907	5.30678e-236	3.94547	5.22728	2.57505	1.48101	1.93244	3.33607	0	0.405866	-0.615593	0	0.383844	1.17157	Synpcc7942_1096	Dusk	0	0.308058	0.572215	0	0.18624	0.84183
189	1123436	1123696	1123579	3.8077e-87	3.31381	4.51927	4.06281	3.48007	2.42016	2.89221	0	0.447599	0.293984	0	-0.524013	-0.266944		0	0	0	0	0	0	0
190	1132715	1133020	1132926	8.01765e-223	5.22314	3.07476	4.12046	3.39687	2.58432	2.07574	0	-0.764443	-0.34211	0	-0.394417	-0.71058	Synpcc7942_1115	Dusk	0	-0.528787	-0.360125	0	0.977357	0.838328
190	1132715	1133020	1132926	8.01765e-223	5.22314	3.07476	4.12046	3.39687	2.58432	2.07574	0	-0.764443	-0.34211	0	-0.394417	-0.71058	Synpcc7942_1116	0	0	0.551411	1.21579	0	-1.28792	-1.40947
191	1137334	1137763	1137729	0	1.66201	6.92617	3.23801	2.65458	2.12919	1.30119	0	2.05913	0.96218	0	-0.318174	-1.02865		0	0	0	0	0	0	0
192	1140491	1142091	1140744	0	15.7132	17.8028	15.3835	11.6706	11.547	12.2256	0	0.180132	-0.0305947	0	-0.0153672	0.0670196	Synpcc7942_1122	0	0	1.44868	2.33065	0	-0.957076	-1.3871
193	1141766	1142192	1141905	8.31487e-222	0.982735	1.32902	1.87967	0.77545	1.74323	5.38291	0	0.435488	0.935605	0	1.16866	2.79528		0	0	0	0	0	0	0
194	1143239	1143528	1143383	4.18091e-179	2.39156	1.18369	3.24479	2.40907	4.38818	4.31143	0	-1.01465	0.440174	0	0.86515	0.839693	Synpcc7942_1125	Dusk	0	-1.35343	-1.21223	0	0.948048	0.580307
195	1144805	1145165	1144977	2.93457e-273	1.79481	4.07514	3.31158	5.79827	2.74614	2.77598	0	1.18302	0.883689	0	-1.07822	-1.06262	Synpcc7942_1127	0	0	-0.0216805	-0.354026	0	0.420367	0.597901
196	1151187	1151671	1151358	0	4.63676	5.68145	6.56271	7.04552	5.36333	4.55317	0	0.293141	0.501173	0	-0.393577	-0.629834	Synpcc7942_1131	0	0	0.716342	1.08122	0	-0.382485	-1.00998
197	1161397	1161685	1161537	4.30405e-84	2.97675	1.28013	3.51458	2.67272	2.08304	3.4288	0	-1.21744	0.239615	0	-0.359621	0.359397	Synpcc7942_1137	0	0	-0.00578709	0.310467	0	-0.277991	-0.649486
198	1164181	1164565	1164205	2.95688993156000e-313	5.23573	3.90922	3.2844	2.92411	1.53618	2.73143	0	-0.42151	-0.67276	0	-0.928647	-0.0983414		0	0	0	0	0	0	0
199	1170497	1171016	1170797	0	17.6801	20.9064	16.6371	12.0765	11.9474	13.8622	0	0.241821	-0.0877201	0	-0.0155041	0.198955	Synpcc7942_R0044	0	0	0.149323	0.539005	0	0.270076	0.00500723
200	1172455	1173151	1172626	0	2.39774	1.13681	1.44995	1.56963	3.75569	4.99575	0	-1.07669	-0.725672	0	1.25866	1.67028	Synpcc7942_1148	0	0	-1.87785	-2.15878	0	1.9738	3.22467
201	1174791	1175214	1175014	0	7.2848	9.95848	6.89546	6.37936	5.96756	4.89405	0	0.451036	-0.0792436	0	-0.0962705	-0.382384		0	0	0	0	0	0	0
202	1178193	1179066	1178805	0	2.95294	2.85287	2.39769	3.58472	2.47087	2.79506	0	-0.0497375	-0.300507	0	-0.536838	-0.358978	Synpcc7942_1152	0	0	0.0706974	-0.208677	0	0.204092	0.182671
203	1183151	1183704	1183340	0	3.96008	3.11399	3.34056	4.27922	4.81595	5.77612	0	-0.346765	-0.245439	0	0.170473	0.432755	Synpcc7942_1156	Dusk	0	-0.0248652	-0.572265	0	0.329148	1.28573
204	1192325	1192715	1192565	0	2.87307	1.54472	0.919335	2.79211	5.3797	5.7715	0	-0.895248	-1.64393	0	0.94617	1.04759		0	0	0	0	0	0	0
205	1196705	1197868	1196886	0	6.67986	4.90299	2.76287	3.66199	7.32244	10.5916	0	-0.446156	-1.27365	0	0.999695	1.53221		0	0	0	0	0	0	0
206	1209634	1210318	1209959	0	5.23159	7.48077	5.1841	5.07205	4.3405	6.4818	0	0.515939	-0.0131567	0	-0.224706	0.353826	Synpcc7942_1176	Dawn	0	-0.307515	0.0788131	0	0.384013	-0.775835
207	1211485	1212087	1211645	7.85828e-240	1.27626	4.28116	3.92885	3.44946	3.11431	3.20281	0	1.74608	1.62219	0	-0.147458	-0.107033	Synpcc7942_1179	0	0	0.535447	0.728906	0	0.133476	0.230567
207	1211485	1212087	1211645	7.85828e-240	1.27626	4.28116	3.92885	3.44946	3.11431	3.20281	0	1.74608	1.62219	0	-0.147458	-0.107033	Synpcc7942_1180	0	0	0.524865	0.557987	0	-0.145342	-0.212837
208	1224093	1224484	1224225	9.91656e-139	2.4157	2.44718	2.05062	1.4849	2.75663	4.39988	0	0.0186808	-0.236384	0	0.892542	1.5671	Synpcc7942_1196	0	0	-0.699423	-0.521637	0	1.06896	0.978644
209	1241276	1243017	1241589	0	11.1058	13.0762	9.97544	7.76843	5.00522	5.66514	0	0.235623	-0.154867	0	-0.634188	-0.455511	Synpcc7942_1218	0	0	0.463417	0.702261	0	-0.081303	-0.528425
209	1241276	1243017	1241589	0	11.1058	13.0762	9.97544	7.76843	5.00522	5.66514	0	0.235623	-0.154867	0	-0.634188	-0.455511	Synpcc7942_1219	0	0	1.11161	1.58152	0	-0.0559174	-1.06748
210	1246448	1247464	1246986	2.58942e-105	2.42317	1.5288	1.30881	2.24209	1.73568	3.75838	0	-0.6645	-0.888642	0	-0.369346	0.745263	Synpcc7942_1225	0	0	-3.04615	-1.51429	0	1.62075	0.746771
211	1248267	1248795	1248567	0	7.20682	7.99445	9.00305	5.8824	5.13162	4.5579	0	0.149637	0.321051	0	-0.19699	-0.368036		0	0	0	0	0	0	0
212	1253199	1253721	1253467	0	5.64511	5.8399	8.72905	7.09328	4.08399	2.1006	0	0.0489408	0.628822	0	-0.796474	-1.75565		0	0	0	0	0	0	0
213	1274201	1274599	1274444	0	5.25279	0.70518	1.74768	4.19861	4.53057	5.49741	0	-2.89702	-1.58764	0	0.109781	0.38884	Synpcc7942_1250	0	0	-3.88902	-1.72911	0	0.521373	0.191534
214	1277244	1277665	1277385	0	2.81862	2.27611	2.64551	5.31077	6.45838	2.84095	0	-0.308418	-0.0914411	0	0.28225	-0.902551	Synpcc7942_1254	Dawn	0	-1.07724	-0.944867	0	1.27926	-0.241515
215	1277874	1278414	1278161	1.41834e-133	1.39504	1.37192	1.05759	2.61986	3.77354	4.3179	0	-0.0241079	-0.399532	0	0.526427	0.720839		0	0	0	0	0	0	0
216	1286593	1286899	1286744	4.84974e-258	5.58738	4.77282	4.24691	3.15615	1.9219	2.68888	0	-0.227328	-0.395757	0	-0.715635	-0.231159		0	0	0	0	0	0	0
217	1287752	1288023	1287880	6.47766e-292	4.35749	4.68907	2.98027	3.9005	4.91403	6.99832	0	0.105804	-0.548053	0	0.333247	0.843351		0	0	0	0	0	0	0
218	1301150	1302247	1301827	0	9.19525	9.60942	7.86366	6.95937	5.83918	6.62841	0	0.0635605	-0.225688	0	-0.253192	-0.0702946	Synpcc7942_1278	0	0	1.16088	1.46608	0	-0.330232	-1.09552
219	1340405	1340837	1340599	0	8.03863	6.30566	8.18139	5.59085	5.65314	4.86072	0	-0.350303	0.0253974	0	0.0159842	-0.2019	Synpcc7942_1313	0	0	1.18652	1.65257	0	-0.611801	-1.59858
220	1351359	1351956	1351545	0	5.38763	1.67147	3.80196	5.7296	8.56708	7.41938	0	-1.68853	-0.502906	0	0.580369	0.372864	Synpcc7942_1322	0	0	-4.04932	-1.64431	0	0.760639	0.466283
221	1360635	1360928	1360755	8.67165e-178	2.80956	1.64396	1.12407	1.49361	2.11646	4.2904	0	-0.773163	-1.32161	0	0.502854	1.52231	Synpcc7942_1327	Dusk	0	-0.504127	-0.852282	0	-0.144906	1.15309
222	1374106	1374787	1374669	0	6.19976	4.27994	2.94528	2.90562	2.35068	3.80112	0	-0.534622	-1.07381	0	-0.305766	0.387579	Synpcc7942_1340	0	0	-0.0278209	-0.278613	0	0.197845	0.379
223	1377012	1377412	1377159	2.72345e-142	2.18712	3.93648	4.73182	5.23757	1.60527	2.89056	0	0.847874	1.11336	0	-1.70608	-0.857549	Synpcc7942_1343	Dawn	0	0.240373	0.709986	0	-0.217087	-1.19622
224	1383008	1383291	1383179	1.09036e-123	2.51794	1.00133	0.820609	2.01915	4.1679	1.72588	0	-1.33033	-1.61748	0	1.04558	-0.226412	Synpcc7942_1352	Dusk	0	-1.88063	-0.918569	0	1.18343	0.449104
225	1385242	1385609	1385335	0	2.29291	6.3054	3.03269	2.74118	1.28788	1.20404	0	1.45941	0.403419	0	-1.0898	-1.18692		0	0	0	0	0	0	0
226	1397752	1398397	1398241	0	3.90126	2.00252	3.55113	3.05361	2.05192	1.66551	0	-0.962124	-0.135664	0	-0.573542	-0.874552	Synpcc7942_1358	Dusk	0	0.99306	0.662841	0	-0.062444	0.559691
227	1413941	1414293	1414095	0	2.22133	1.78308	2.12454	2.80077	7.04818	6.63463	0	-0.317048	-0.0642726	0	1.33143	1.24419	Synpcc7942_1373	0	0	-1.14026	-0.120806	0	0.971912	-0.0621909
228	1417230	1417852	1417528	2.7929e-300	2.94617	1.66837	1.94579	4.66947	2.09016	2.78319	0	-0.820403	-0.598487	0	-1.15965	-0.746519	Synpcc7942_1376	Dusk	0	-0.492799	-0.880477	0	0.198024	0.270188
228	1417230	1417852	1417528	2.7929e-300	2.94617	1.66837	1.94579	4.66947	2.09016	2.78319	0	-0.820403	-0.598487	0	-1.15965	-0.746519	Synpcc7942_1377	0	0	-0.414137	-0.720521	0	0.890994	1.05417
229	1421061	1421654	1421352	0	8.05324	8.54064	8.51008	6.40528	5.93714	5.70834	0	0.0847751	0.0796036	0	-0.109493	-0.16619	Synpcc7942_1379	0	0	0.686721	1.17016	0	-0.625477	-1.01828
230	1435512	1435825	1435650	0	0.153351	8.74974	4.10194	2.36256	0.241416	0.561352	0	5.83433	4.7414	0	-3.29075	-2.07337		0	0	0	0	0	0	0
231	1445827	1446690	1446122	0	6.49566	0.259806	1.40042	2.33799	4.54737	7.0511	0	-4.64397	-2.21362	0	0.959765	1.59258	Synpcc7942_1396	Dusk	0	-1.31866	-1.66162	0	1.39514	1.92631
231	1445827	1446690	1446122	0	6.49566	0.259806	1.40042	2.33799	4.54737	7.0511	0	-4.64397	-2.21362	0	0.959765	1.59258	Synpcc7942_1397	Dusk	0	-3.86153	-3.12365	0	1.92101	1.84677
232	1474877	1475452	1475083	0	6.79639	6.25538	6.08338	5.84479	4.20653	2.46033	0	-0.119671	-0.159896	0	-0.474521	-1.2483	Synpcc7942_1421	0	0	0.28537	0.448871	0	-0.475566	-1.23765
233	1475451	1476401	1475693	0	4.24836	5.07846	4.92819	5.61823	4.35581	3.16992	0	0.257484	0.214152	0	-0.367174	-0.825666	Synpcc7942_1422	Dawn	0	0.84035	0.95366	0	-1.16754	-2.0038
234	1479129	1479921	1479374	0	2.71759	4.84929	4.27759	3.59711	2.56395	2.37986	0	0.835447	0.65447	0	-0.488468	-0.595962	Synpcc7942_1426	Dawn	0	0.163444	0.753565	0	-0.379436	-1.58523
235	1482439	1482951	1482616	0	3.20293	4.13191	4.02698	4.18301	3.73729	3.35054	0	0.367413	0.330303	0	-0.162551	-0.320148		0	0	0	0	0	0	0
236	1483956	1484831	1484370	0	4.76986	1.24591	1.51591	2.31929	4.14495	13.6048	0	-1.93675	-1.65377	0	0.837675	2.55236	Synpcc7942_1430	0	0	-0.921308	-0.655663	0	0.80735	1.73774
236	1483956	1484831	1484370	0	4.76986	1.24591	1.51591	2.31929	4.14495	13.6048	0	-1.93675	-1.65377	0	0.837675	2.55236	Synpcc7942_1431	Dawn	0	-0.0799423	0.0629186	0	0.560068	0.898797
237	1491785	1492709	1492331	0	6.76592	12.3058	8.72153	13.7655	4.62811	3.5576	0	0.862974	0.366293	0	-1.57256	-1.95208	Synpcc7942_1438	0	0	0.108662	-0.580265	0	0.719107	0.575709
238	1493385	1494228	1494007	0	1.72274	3.57664	3.7983	4.19326	5.75645	2.94374	0	1.0539	1.14065	0	0.457108	-0.510419		0	0	0	0	0	0	0
239	1496663	1497356	1496841	0	11.3999	9.61447	10.3298	7.01791	3.96529	5.97299	0	-0.245744	-0.142217	0	-0.823616	-0.232587	Synpcc7942_1443	Dawn	0	0.321173	0.64097	0	0.229465	-0.749742
240	1506190	1506565	1506307	3.97375e-286	4.28505	1.23784	3.53467	3.63276	1.64975	2.08825	0	-1.79148	-0.277738	0	-1.13882	-0.798772	Synpcc7942_1453	0	0	-1.31605	0.0928833	0	-1.30683	-1.40299
241	1512230	1512546	1512520	4.89227e-298	2.68022	2.11329	1.15144	2.90506	3.64348	4.82158	0	-0.342863	-1.21891	0	0.32675	0.730939	Synpcc7942_1459	0	0	-0.434548	-0.417088	0	1.1328	1.13819
242	1517009	1519137	1517195	0	8.41586	6.64497	8.97327	8.51928	9.49896	7.86995	0	-0.340847	0.0925242	0	0.157039	-0.114377	Synpcc7942_1464	Dawn	0	0.123702	0.552533	0	-0.245404	-1.38323
243	1519345	1520110	1519632	0	2.75995	1.48899	2.18428	2.00618	4.32374	5.42829	0	-0.890302	-0.337485	0	1.10783	1.43605	Synpcc7942_1466	Dusk	0	-0.346359	-0.478573	0	0.767121	1.00825
244	1530611	1531190	1530827	0	4.41436	12.803	9.27314	5.18155	2.6767	1.65606	0	1.5362	1.07085	0	-0.952928	-1.64562	Synpcc7942_1479	0	0	0.257636	0.0925516	0	-0.0651058	-0.396558
245	1536771	1537231	1536963	0	7.4514	7.57106	8.33594	6.03693	5.77533	5.20593	0	0.022984	0.161834	0	-0.0639113	-0.213659	Synpcc7942_1486	Dawn	0	-0.129797	-0.0191463	0	0.114054	-0.315401
245	1536771	1537231	1536963	0	7.4514	7.57106	8.33594	6.03693	5.77533	5.20593	0	0.022984	0.161834	0	-0.0639113	-0.213659	Synpcc7942_1487	0	0	1.40472	1.94857	0	-0.6966	-1.35058
246	1548809	1549193	1548989	0	3.81012	3.50076	6.30592	4.71935	7.3731	3.15055	0	-0.122171	0.726869	0	0.643682	-0.582985	Synpcc7942_1499	Dusk	0	-0.165653	0.101198	0	0.605263	0.128148
247	1551564	1551893	1551715	0	4.8185	5.8526	6.16062	5.38158	4.82457	2.97147	0	0.280492	0.35449	0	-0.157628	-0.856851		0	0	0	0	0	0	0
248	1556287	1557020	1556827	0	1.67689	0.291359	0.58744	1.55643	5.53919	3.6858	0	-2.52492	-1.51328	0	1.83144	1.24374	Synpcc7942_1506	Dusk	0	-2.0188	-2.05069	0	2.67035	2.59128
249	1557029	1557560	1557324	0	6.63115	11.7169	11.7008	6.28737	4.28193	4.49466	0	0.821263	0.81928	0	-0.554197	-0.484246		0	0	0	0	0	0	0
250	1558458	1558822	1558674	2.39643e-194	1.64532	0.683642	1.54176	1.93137	3.66929	3.38815	0	-1.26706	-0.0937938	0	0.925874	0.810868		0	0	0	0	0	0	0
251	1559144	1559523	1559285	0	8.39599	7.47043	8.78957	7.57035	6.62583	8.40201	0	-0.168509	0.0660922	0	-0.192259	0.150375	Synpcc7942_1508	Dusk	0	-0.519153	-0.197532	0	-0.41798	-0.892205
251	1559144	1559523	1559285	0	8.39599	7.47043	8.78957	7.57035	6.62583	8.40201	0	-0.168509	0.0660922	0	-0.192259	0.150375	Synpcc7942_1509	Dawn	0	0.323916	0.256965	0	0.278629	0.712597
252	1560766	1561339	1561114	0	0.812254	0.533265	0.576044	1.41065	5.02541	3.98607	0	-0.607079	-0.495751	0	1.83288	1.4986		0	0	0	0	0	0	0
253	1572154	1573213	1572496	0	16.0572	19.0085	15.4354	14.0676	13.8836	11.5009	0	0.243423	-0.0569783	0	-0.0189894	-0.29062	Synpcc7942_1519	0	0	0.27784	0.245482	0	0.159715	0.157772
253	1572154	1573213	1572496	0	16.0572	19.0085	15.4354	14.0676	13.8836	11.5009	0	0.243423	-0.0569783	0	-0.0189894	-0.29062	Synpcc7942_1521	0	0	1.45877	1.47456	0	-1.72981	-1.31504
254	1573502	1574731	1573656	0	8.27429	14.8148	8.68014	7.67833	4.29088	5.99168	0	0.840328	0.0690821	0	-0.839518	-0.357832	Synpcc7942_1522	0	0	1.16617	1.21172	0	-1.12418	-0.617804
255	1583186	1583609	1583371	0	1.33862	7.30917	3.58725	4.09152	1.94933	3.60452	0	2.44896	1.42213	0	-1.06966	-0.182833	Synpcc7942_1525	Dawn	0	1.22747	0.772037	0	-0.485848	-0.818574
256	1610223	1610585	1610400	0	10.09	10.9894	11.0503	10.744	6.69431	5.63122	0	0.123189	0.131159	0	-0.682525	-0.932013	Synpcc7942_1552	0	0	1.26743	1.65986	0	-1.11524	-1.57911
257	1611734	1612051	1611907	1.30593e-136	2.32479	2.51774	2.717	1.80504	1.96122	3.8338	0	0.115029	0.224913	0	0.119726	1.08675	Synpcc7942_1554	0	0	0.413037	0.260568	0	-0.120628	-0.202967
258	1612689	1613535	1612830	0	3.99937	5.89454	4.35733	3.21282	3.20005	5.85159	0	0.559604	0.123671	0	-0.00574485	0.864991	Synpcc7942_1556	Dusk	0	-0.513439	-0.627643	0	0.632842	1.79063
259	1613102	1613583	1613282	0	2.86288	0.856115	1.35364	2.76976	4.17367	2.69468	0	-1.74159	-1.08062	0	0.591557	-0.0396453		0	0	0	0	0	0	0
260	1613963	1614734	1614539	0	5.66446	2.57254	2.01387	3.18017	9.20236	7.6091	0	-1.13875	-1.49197	0	1.5329	1.25862	Synpcc7942_1557	Dusk	0	-1.57773	-1.12759	0	1.70072	0.247162
261	1619632	1620224	1620042	0	11.6765	12.8027	9.25057	8.2989	7.92728	8.17506	0	0.132835	-0.335995	0	-0.0660954	-0.0216912	Synpcc7942_1562	0	0	1.34021	0.507253	0	-0.300045	-0.30473
262	1622480	1623071	1622915	0	9.76787	10.4947	12.2049	11.4091	8.62606	7.05074	0	0.103544	0.321341	0	-0.403411	-0.694336		0	0	0	0	0	0	0
263	1630935	1631594	1631146	0	1.8304	1.30789	0.387408	1.19628	2.74917	6.92056	0	-0.484922	-2.24024	0	1.20044	2.53233	Synpcc7942_1572	Dusk	0	-1.4311	-2.06407	0	2.01279	3.51375
264	1652236	1652947	1652370	1.74567562500000e-314	1.92187	1.78966	0.787717	0.984581	4.44296	3.47231	0	-0.102822	-1.28676	0	2.17394	1.81832		0	0	0	0	0	0	0
265	1653041	1653317	1653161	7.54852e-308	2.50374	1.82446	1.15618	1.79371	4.67656	2.94972	0	-0.456619	-1.11472	0	1.3825	0.717626		0	0	0	0	0	0	0
266	1659822	1660199	1659947	0	4.27931	4.83305	7.86877	5.54715	5.5163	6.12035	0	0.175557	0.878759	0	-0.00804501	0.141867	Synpcc7942_1593	0	0	0.400635	0.598002	0	-0.171397	-0.208729
267	1662626	1663133	1662778	0	2.255	5.85816	3.60764	2.89579	1.12662	1.20358	0	1.37732	0.677932	0	-1.36196	-1.26662	Synpcc7942_1596	0	0	1.74898	1.01791	0	-1.27242	-0.841903
268	1681641	1682071	1681882	0	1.92423	1.16204	0.960492	1.95745	3.02926	6.27821	0	-0.727627	-1.00244	0	0.629993	1.68138	Synpcc7942_1613	0	0	-0.103554	0.156273	0	0.192114	-0.23193
269	1682446	1682766	1682569	0	4.73975	5.24971	3.80824	3.88891	3.19973	2.90069	0	0.147427	-0.315688	0	-0.281417	-0.422969	Synpcc7942_1614	0	0	0.659081	0.896921	0	-0.302738	-0.393982
270	1683486	1684087	1683734	1.65748e-235	3.00091	2.91826	6.28869	3.74515	2.40192	2.91182	0	-0.040295	1.06736	0	-0.640835	-0.363104	Synpcc7942_1617	Dawn	0	0.671498	0.921165	0	-0.405353	-0.858884
271	1688994	1689294	1689170	5.37117191043858e-310	5.65578	4.8726	2.08593	1.30083	3.0812	2.87716	0	-0.215036	-1.43904	0	1.24406	1.14521	Synpcc7942_1621	Dusk	0	-0.345443	-0.399781	0	0.134138	-0.362753
272	1701029	1701747	1701366	0	5.36891	4.25174	2.76806	4.87686	8.42114	4.79433	0	-0.336577	-0.955755	0	0.788061	-0.0246246	Synpcc7942_1633	Dusk	0	-1.24606	-1.09053	0	1.16136	0.61901
273	1701827	1704060	1702849	0	3.46925	5.57966	2.51825	3.10969	3.3201	3.67386	0	0.685552	-0.462205	0	0.0944587	0.240527	Synpcc7942_1634	0	0	0.151623	-0.175388	0	-0.278619	-0.332582
274	1704080	1704738	1704522	0	8.92976	8.9861	6.77663	7.40055	6.67365	5.95892	0	0.00907409	-0.398054	0	-0.149156	-0.312581	Synpcc7942_1635	Dusk	0	-0.122724	-0.133533	0	0.111591	-0.521789
275	1705002	1705478	1705311	0	3.80582	2.07525	2.08892	6.96275	4.87019	3.36761	0	-0.874924	-0.865452	0	-0.51568	-1.04794	Synpcc7942_1636	Dusk	0	-1.27905	-1.9766	0	1.10586	2.12223
276	1713810	1714466	1714279	0	4.60088	0.69478	2.0516	2.76484	5.85139	5.55482	0	-2.72728	-1.16516	0	1.08158	1.00654	Synpcc7942_1646	Dusk	0	-2.45023	-1.76887	0	2.23875	2.27445
277	1729212	1729634	1729510	1.29895e-251	2.32677	1.53557	3.62263	3.63439	1.89244	5.36409	0	-0.599561	0.638707	0	-0.941462	0.561621		0	0	0	0	0	0	0
278	1744048	1744345	1744155	4.45104e-278	3.25881	5.15682	6.10364	7.01505	5.82218	2.81546	0	0.662139	0.905327	0	-0.268894	-1.31708	Synpcc7942_1673	0	0	-0.0977779	0.0467657	0	0.0976584	0.185592
279	1772701	1773224	1772837	0	10.3974	3.72872	6.97123	6.72099	8.65139	6.54412	0	-1.47947	-0.576737	0	0.364258	-0.0384743	Synpcc7942_1705	0	0	-1.03987	-0.617922	0	1.36917	0.991578
280	1779839	1780217	1780007	0	3.31993	4.91049	4.29311	5.21544	4.45806	4.73749	0	0.564716	0.370871	0	-0.226374	-0.138667	Synpcc7942_1710	0	0	0.351092	0.369147	0	-0.0826219	-0.0274668
281	1787472	1787927	1787676	3.83349e-243	2.78998	1.68795	2.37944	1.73653	2.81493	3.92088	0	-0.724983	-0.229636	0	0.696895	1.17497		0	0	0	0	0	0	0
282	1792275	1792753	1792432	0	6.13798	13.4721	8.55222	4.35973	3.84797	6.8381	0	1.13414	0.478535	0	-0.180139	0.649356		0	0	0	0	0	0	0
283	1792659	1793331	1793104	0	4.15114	0.369637	0.48649	2.52072	18.1143	19.1366	0	-3.48933	-3.09302	0	2.84522	2.92443		0	0	0	0	0	0	0
284	1804115	1804532	1804216	0	3.12309	4.42963	3.55373	5.45365	2.18617	1.87876	0	0.50421	0.18636	0	-1.31882	-1.53744	Synpcc7942_1734	0	0	1.18858	-0.0835407	0	-0.809143	-0.476004
285	1812465	1813553	1812764	0	8.01869	10.2268	11.4457	9.67666	7.86828	8.86408	0	0.350913	0.513368	0	-0.298462	-0.126539	Synpcc7942_1741	Dusk	0	-0.269692	-0.151793	0	-0.110424	-0.439307
285	1812465	1813553	1812764	0	8.01869	10.2268	11.4457	9.67666	7.86828	8.86408	0	0.350913	0.513368	0	-0.298462	-0.126539	Synpcc7942_1742	0	0	0.937956	0.946794	0	-1.63152	-2.15952
286	1813992	1814261	1814109	1.95179e-245	4.48152	1.9505	2.81042	3.64455	1.93038	4.16073	0	-1.20014	-0.673202	0	-0.916857	0.191094		0	0	0	0	0	0	0
287	1817462	1817965	1817659	0	7.81408	3.36654	2.70674	4.60307	9.94501	11.9264	0	-1.21481	-1.52952	0	1.11138	1.3735	Synpcc7942_1746	Dawn	0	-0.352247	-0.949817	0	0.705685	1.11988
288	1820653	1821000	1820778	0	3.28637	4.57848	4.53504	5.27314	7.11277	4.51872	0	0.478377	0.464622	0	0.43175	-0.222748	Synpcc7942_1750	0	0	-0.177612	-0.662824	0	0.394225	0.419454
289	1824453	1825096	1824673	0	6.11793	2.19749	2.0343	3.14103	8.92104	7.67301	0	-1.47719	-1.58851	0	1.50597	1.28855		0	0	0	0	0	0	0
290	1826332	1826586	1826455	2.47971e-68	1.47411	3.58335	2.80158	1.61013	1.75807	3.99576	0	1.28146	0.926394	0	0.126809	1.31129	Synpcc7942_1759	0	0	0.151445	0.0115148	0	0.193211	0.507641
291	1838570	1839773	1838747	0	3.80889	5.54601	5.81503	3.91	3.39979	2.44465	0	0.54208	0.610415	0	-0.201724	-0.677542	Synpcc7942_1772	0	0	1.13525	1.50292	0	-0.529936	-0.870533
292	1838937	1839676	1839384	0	3.38603	3.02138	8.0169	5.72933	3.82067	2.51149	0	-0.16439	1.24345	0	-0.58454	-1.18982	Synpcc7942_1774	0	0	0.884905	1.45423	0	-0.325816	-0.718487
293	1852252	1853455	1852472	0	9.34722	2.1952	1.0456	2.20867	10.6547	14.3023	0	-2.09018	-3.16021	0	2.27025	2.695	Synpcc7942_1784	Dusk	0	-5.13615	-3.82674	0	3.30889	4.0535
294	1863164	1863485	1863291	3.32669e-132	2.96505	2.90361	1.53884	4.44422	2.5797	3.35156	0	-0.0302083	-0.946214	0	-0.784727	-0.407097		0	0	0	0	0	0	0
295	1864253	1864506	1864405	1.20895e-134	2.4515	1.75509	2.38865	2.64477	3.7907	2.39476	0	-0.482119	-0.03747	0	0.519322	-0.143263	Synpcc7942_1793	0	0	0.444867	0.94364	0	-0.717459	-1.0903
296	1873526	1873995	1873791	0	5.65439	6.98502	5.97779	6.68385	4.09948	5.20412	0	0.304893	0.0802399	0	-0.705237	-0.361026	Synpcc7942_1803	0	0	0.0215389	-0.29057	0	0.623122	0.748542
297	1874225	1874563	1874469	3.90772e-247	3.67868	2.45035	3.89102	2.28818	5.48433	2.26229	0	-0.586197	0.0809616	0	1.26111	-0.0164166	Synpcc7942_1804	Dusk	0	-0.175465	-0.0393433	0	0.308941	0.113877
298	1876916	1877194	1877071	3.12155e-124	1.58372	0.790353	1.91759	2.70194	1.79724	3.73258	0	-1.00275	0.275974	0	-0.588212	0.466175		0	0	0	0	0	0	0
299	1893617	1894008	1893783	4.43577e-207	3.94071	2.37785	1.65491	2.7342	2.81962	3.09356	0	-0.7288	-1.25171	0	0.0443813	0.178149	Synpcc7942_1820	0	0	0.670242	-0.633637	0	0.496884	0.231953
299	1893617	1894008	1893783	4.43577e-207	3.94071	2.37785	1.65491	2.7342	2.81962	3.09356	0	-0.7288	-1.25171	0	0.0443813	0.178149	Synpcc7942_1821	0	0	0.953617	0.123681	0	0.174021	0.230567
300	1898920	1899394	1899040	0	8.06342	7.88389	8.83105	6.55532	8.45107	3.6937	0	-0.0324848	0.131193	0	0.366468	-0.8276		0	0	0	0	0	0	0
301	1899396	1899997	1899625	0	14.2852	6.06738	7.06387	9.72901	11.9567	8.94869	0	-1.23538	-1.016	0	0.29745	-0.120616	Synpcc7942_1830	Dusk	0	-0.996623	-0.791905	0	1.17963	1.12411
302	1900809	1901235	1900991	0	4.13029	8.86728	7.17693	6.91755	3.10939	2.60875	0	1.10225	0.797123	0	-1.15363	-1.4069		0	0	0	0	0	0	0
303	1901494	1902073	1901741	0	4.45422	4.48283	7.36428	4.74857	4.53778	3.60578	0	0.00923903	0.725373	0	-0.0655089	-0.397183	Synpcc7942_1832	Dawn	0	0.592894	0.656255	0	-1.34062	-1.4212
304	1905730	1906178	1905936	0	1.74629	0.459587	0.276491	0.468682	2.60743	7.96941	0	-1.92589	-2.65899	0	2.47595	4.08779		0	0	0	0	0	0	0
305	1915722	1916306	1916051	0	4.52861	3.82213	5.08911	5.59738	4.18007	2.77658	0	-0.244692	0.168345	0	-0.421226	-1.01144	Synpcc7942_1848	0	0	0.599242	0.20027	0	-0.279867	0.184938
306	1916324	1917887	1916589	0	5.47678	2.79678	0.998736	1.87007	5.44569	12.0737	0	-0.96956	-2.45515	0	1.54202	2.69071	Synpcc7942_1849	Dusk	0	-3.48164	-3.19331	0	3.361	4.42971
307	1919019	1919550	1919218	0	4.58634	4.78668	4.66132	6.1573	5.87087	3.27736	0	0.0616835	0.0233969	0	-0.068724	-0.909764		0	0	0	0	0	0	0
308	1926642	1927331	1926788	0	5.31019	1.32704	2.41829	4.64056	3.78625	2.28091	0	-2.00055	-1.13477	0	-0.293531	-1.02469	Synpcc7942_1858	0	0	-2.51403	-0.709483	0	0.331748	-0.628668
309	1935398	1935654	1935486	5.33406e-141	4.60997	2.43154	1.39576	2.60323	2.1345	4.16192	0	-0.922888	-1.72371	0	-0.286404	0.676946		0	0	0	0	0	0	0
310	1955083	1955430	1955189	0	1.16639	0.920598	1.68968	2.30174	4.18619	1.54403	0	-0.341413	0.534694	0	0.862915	-0.576019		0	0	0	0	0	0	0
311	1956112	1956355	1956271	6.37407e-124	3.59134	1.29459	2.48729	2.84022	2.10218	1.45161	0	-1.47203	-0.529945	0	-0.434121	-0.968353	Synpcc7942_1883	0	0	0.296286	0.40849	0	-0.266083	-0.327211
312	1964191	1965211	1964450	0	3.60855	2.52263	4.00134	4.89226	2.48327	1.99285	0	-0.51649	0.149065	0	-0.978261	-1.29567		0	0	0	0	0	0	0
313	1967596	1967976	1967711	3.46482e-305	6.99018	2.74236	2.45764	5.37095	4.85259	6.55186	0	-1.34991	-1.50806	0	-0.146422	0.286727	Synpcc7942_1895	Dusk	0	-0.0826938	-0.210988	0	0.137422	0.0956543
314	1984360	1984688	1984582	7.1949e-257	2.88081	2.16153	2.43454	3.15441	4.84324	3.76731	0	-0.414421	-0.242825	0	0.618602	0.256164	Synpcc7942_1907	Dusk	0	-1.70878	-0.585554	0	0.122535	-0.0607593
315	1988619	1989050	1988947	2.80446e-274	4.01374	2.26445	4.05257	3.3615	3.74434	2.33425	0	-0.82579	0.0138876	0	0.155607	-0.526142	Synpcc7942_1911	0	0	0.866977	0.542697	0	-0.401542	-0.134425
316	1989575	1990143	1989737	0	4.58126	1.03228	1.69334	4.06837	9.71185	8.28096	0	-2.14991	-1.43587	0	1.25529	1.02534	Synpcc7942_1913	Dusk	0	-1.49692	-0.628335	0	0.511366	0.24792
317	1990825	1991314	1991011	6.45226e-122	4.45795	1.12559	2.39423	4.22766	3.61192	2.7285	0	-1.9857	-0.896821	0	-0.227096	-0.631755		0	0	0	0	0	0	0
318	1991274	1991581	1991430	3.22215e-160	1.87143	1.55826	3.07213	3.31151	1.67595	4.21652	0	-0.264203	0.715101	0	-0.982512	0.348563	Synpcc7942_1915	0	0	0.201096	0.349189	0	-0.284475	-0.677136
319	1998056	1998369	1998192	0	5.53841	7.42327	6.53759	6.08966	5.29899	3.2545	0	0.422583	0.239288	0	-0.200644	-0.903925		0	0	0	0	0	0	0
320	1998908	1999341	1999179	0	4.2109	2.51509	2.93406	3.94261	5.79454	5.49509	0	-0.743517	-0.521231	0	0.555543	0.478993	Synpcc7942_1922	0	0	-0.590201	-0.760484	0	1.04743	1.15948
321	2018221	2018501	2018344	5.20197e-144	2.87983	3.4648	3.92617	4.4354	3.0197	2.00135	0	0.266786	0.447139	0	-0.55466	-1.14809	Synpcc7942_1944	Dawn	0	0.271625	0.603539	0	-0.125982	-0.518396
322	2023892	2024233	2024017	2.25018e-186	3.88358	0.919324	1.57923	2.30449	4.2168	2.47198	0	-2.07874	-1.29817	0	0.8717	0.101219	Synpcc7942_1950	Dusk	0	-1.08183	-1.3195	0	1.25478	2.05195
323	2024755	2025527	2025314	0	3.95922	3.13142	3.7576	4.20647	2.88196	2.3602	0	-0.338398	-0.0754055	0	-0.54556	-0.833704		0	0	0	0	0	0	0
324	2027723	2028017	2027839	0	5.09462	8.88862	9.9871	8.72267	5.07941	3.70368	0	0.802986	0.971092	0	-0.780111	-1.23581	Synpcc7942_1956	0	0	-0.119943	0.101077	0	0.304043	0.0931388
325	2032488	2032875	2032657	0	2.31763	4.21574	3.48073	2.97158	3.12736	3.3083	0	0.863136	0.586743	0	0.0737171	0.154861		0	0	0	0	0	0	0
326	2045129	2045489	2045238	0	4.17268	1.64256	1.37312	1.39086	2.50999	1.99056	0	-1.34503	-1.60352	0	0.851706	0.517202		0	0	0	0	0	0	0
327	2045490	2046159	2045718	0	1.58267	0.359473	1.48994	2.60446	4.63275	6.84923	0	-2.13841	-0.0871083	0	0.830887	1.39496		0	0	0	0	0	0	0
328	2047139	2047561	2047455	0	4.07113	2.8621	2.87105	4.00614	6.74871	10.1108	0	-0.508359	-0.503854	0	0.752397	1.33561	Synpcc7942_1976	Dusk	0	-1.57939	-1.60302	0	1.92385	1.81669
329	2049787	2049998	2049886	9.63174e-220	2.0751	1.3015	2.46241	4.31266	3.96328	3.01056	0	-0.673001	0.246895	0	-0.121882	-0.518544	Synpcc7942_1977	0	0	0.0248275	0.251851	0	-0.425377	-0.529865
330	2052638	2053372	2052933	0	3.40732	11.3133	5.85827	5.103	2.21047	2.76677	0	1.73131	0.781837	0	-1.20699	-0.883141	Synpcc7942_1982	0	0	-0.538495	-0.142394	0	0.109102	-0.380264
330	2052638	2053372	2052933	0	3.40732	11.3133	5.85827	5.103	2.21047	2.76677	0	1.73131	0.781837	0	-1.20699	-0.883141	Synpcc7942_1983	0	0	2.56375	1.72759	0	-2.00022	-2.18076
331	2054196	2055013	2054319	0	3.39285	5.22424	6.90059	6.61841	5.16683	2.30415	0	0.622721	1.02422	0	-0.357206	-1.52225	Synpcc7942_1984	0	0	0.736197	0.391391	0	-0.300252	-0.642109
332	2057398	2058276	2057771	0	7.65766	0.527219	1.00419	2.22057	8.01747	10.0261	0	-3.86043	-2.93086	0	1.85221	2.17476	Synpcc7942_1986	0	0	-1.36187	-1.20439	0	1.015	1.16753
332	2057398	2058276	2057771	0	7.65766	0.527219	1.00419	2.22057	8.01747	10.0261	0	-3.86043	-2.93086	0	1.85221	2.17476	Synpcc7942_1987	Dusk	0	-4.55713	-3.61012	0	2.85709	2.98501
333	2059729	2060034	2059836	7.53563e-279	2.68665	4.33078	4.55638	2.5336	1.07612	1.2241	0	0.688816	0.76208	0	-1.23535	-1.04947		0	0	0	0	0	0	0
334	2067361	2068125	2067826	0	4.38337	2.58297	4.12506	4.7337	2.52039	2.97756	0	-0.763007	-0.0876252	0	-0.90932	-0.668838	Synpcc7942_1999	0	0	0.412717	0.662406	0	-0.597148	-1.01416
335	2079821	2080279	2080131	0	5.15426	2.81362	4.77684	6.48628	5.13557	2.4597	0	-0.873339	-0.109709	0	-0.336867	-1.39891		0	0	0	0	0	0	0
336	2084562	2085130	2084759	0	4.69285	4.02618	3.19123	3.35158	3.00508	2.86181	0	-0.221055	-0.556351	0	-0.157437	-0.227912	Synpcc7942_2015	0	0	-0.272005	-0.0415356	0	0.434773	0.08224
336	2084562	2085130	2084759	0	4.69285	4.02618	3.19123	3.35158	3.00508	2.86181	0	-0.221055	-0.556351	0	-0.157437	-0.227912	Synpcc7942_2017	0	0	0.141619	0.0276625	0	0.517827	0.168352
337	2085312	2085782	2085498	0	7.19796	7.60956	10.9053	7.4194	5.29954	4.03896	0	0.0802243	0.599375	0	-0.485435	-0.877318		0	0	0	0	0	0	0
338	2089804	2090232	2090052	9.59031e-226	4.62011	2.64839	3.37535	4.24496	3.0844	3.62777	0	-0.802813	-0.452893	0	-0.46076	-0.226667	Synpcc7942_2020	0	0	0.153107	0.201419	0	0.481741	0.476817
339	2092086	2092497	2092399	0	5.64513	3.31434	5.23802	5.87385	2.69492	3.2487	0	-0.768286	-0.107985	0	-1.12406	-0.854446	Synpcc7942_2023	0	0	1.76763	1.85874	0	-0.989491	-0.562733
340	2094306	2094712	2094416	3.67855e-163	1.49412	2.79506	3.07759	3.64174	0.733219	2.49477	0	0.903578	1.0425	0	-2.31231	-0.545721	Synpcc7942_2026	Dawn	0	-0.0850224	0.554142	0	-0.401274	-0.510718
341	2099910	2100483	2100368	0	4.49131	0.664183	2.72041	2.75542	3.73489	1.88502	0	-2.75748	-0.72331	0	0.438794	-0.547692	Synpcc7942_2030	0	0	-2.99937	-1.09556	0	0.216222	-0.468096
342	2123550	2126572	2126328	0	7.71229	0.288176	1.74268	4.65613	7.67586	3.33736	0	-4.74214	-2.14586	0	0.721197	-0.480423	Synpcc7942_2049	0	0	-1.97739	-1.87941	0	0.705973	0.499537
342	2123550	2126572	2126328	0	7.71229	0.288176	1.74268	4.65613	7.67586	3.33736	0	-4.74214	-2.14586	0	0.721197	-0.480423	Synpcc7942_2050	Dawn	0	-0.730628	0.0890286	0	-0.120519	0.302299
343	2134519	2135199	2134741	0	4.20808	2.03971	3.2091	3.41613	5.41951	6.50614	0	-1.04479	-0.390994	0	0.6658	0.92944	Synpcc7942_2057	Dawn	0	-0.287862	0.327191	0	0.430888	-0.385064
344	2137131	2137524	2137274	0	4.97167	4.38535	4.16635	5.9178	4.88645	4.14265	0	-0.18104	-0.254946	0	-0.276274	-0.514507	Synpcc7942_2059	Dusk	0	-0.73694	-1.10647	0	0.193603	-0.0744851
345	2138219	2138705	2138495	1.03081e-128	1.48994	1.5178	4.19415	3.88668	1.85956	0.859109	0	0.0267296	1.49312	0	-1.06358	-2.17762	Synpcc7942_2061	Dawn	0	0.0975346	0.474621	0	-0.167414	-0.538928
346	2140642	2140953	2140795	7.39806e-132	0.955065	0.551487	2.48728	3.75187	1.83334	0.823901	0	-0.792272	1.3809	0	-1.03313	-2.18707	Synpcc7942_2064	0	0	0.401538	0.914451	0	0.00953777	-0.60177
347	2149486	2149941	2149752	0	5.50827	2.10485	3.77843	5.02245	7.92643	6.45513	0	-1.38788	-0.543813	0	0.65828	0.362056	Synpcc7942_2071	0	0	-0.819286	-0.946514	0	0.469334	0.739485
347	2149486	2149941	2149752	0	5.50827	2.10485	3.77843	5.02245	7.92643	6.45513	0	-1.38788	-0.543813	0	0.65828	0.362056	Synpcc7942_2072	0	0	-0.500583	-0.196994	0	-0.196853	0.0388372
348	2150133	2150908	2150458	0	7.74261	8.08972	4.58725	7.35343	10.087	8.32851	0	0.0632682	-0.755191	0	0.456003	0.179641		0	0	0	0	0	0	0
349	2161337	2161623	2161495	4.66202e-194	1.6276	1.70878	0.915549	1.49106	1.74086	4.2465	0	0.070221	-0.830039	0	0.223457	1.50993		0	0	0	0	0	0	0
350	2166541	2166816	2166633	0	1.42716	6.50537	3.90852	3.39281	1.59739	0.783319	0	2.18848	1.45348	0	-1.08676	-2.11481		0	0	0	0	0	0	0
351	2166841	2167219	2167027	0	2.74545	7.26348	5.60819	5.38958	3.42827	2.75733	0	1.40362	1.03049	0	-0.652693	-0.966902	Synpcc7942_2086	Dawn	0	0.697908	1.02258	0	-0.799997	-1.51978
352	2167789	2168506	2168005	0	1.12749	7.11457	2.29586	1.32619	0.729105	0.409551	0	2.65766	1.02592	0	-0.86309	-1.69517		0	0	0	0	0	0	0
353	2169379	2169949	2169578	2.57266e-199	2.82609	1.96238	1.94555	2.93466	4.8103	3.25682	0	-0.5262	-0.538631	0	0.712937	0.150272	Synpcc7942_2090	0	0	0.339409	0.706903	0	-0.223985	-0.876873
354	2193550	2194283	2193736	0	5.63443	6.79322	7.07571	6.02092	4.00696	3.7636	0	0.269826	0.328604	0	-0.587477	-0.677872		0	0	0	0	0	0	0
355	2195814	2196394	2196160	0	7.68379	14.5221	13.1887	8.7929	6.34904	6.40906	0	0.91836	0.779416	0	-0.469799	-0.456225		0	0	0	0	0	0	0
356	2199801	2200174	2200059	0	5.10739	1.54168	2.36093	2.58265	3.57229	6.07627	0	-1.72808	-1.11323	0	0.467996	1.23433	Synpcc7942_2118	0	0	0.707617	-0.176572	0	-0.378816	-0.0670456
357	2201775	2202813	2202346	0	10.0225	10.6259	10.1854	7.66692	6.97052	8.44538	0	0.0843392	0.0232613	0	-0.137383	0.139514	Synpcc7942_2120	0	0	1.28523	0.167886	0	-0.564944	-0.0454342
358	2203539	2203876	2203720	0	4.21957	5.75633	6.47158	5.29922	2.4742	2.26324	0	0.448054	0.617022	0	-1.09882	-1.22739		0	0	0	0	0	0	0
359	2206886	2207357	2207094	0	4.80067	8.36128	4.03297	5.25368	7.00489	5.89025	0	0.800488	-0.251393	0	0.415033	0.164999	Synpcc7942_2126	0	0	0.174868	0.587753	0	0.927486	0.571262
359	2206886	2207357	2207094	0	4.80067	8.36128	4.03297	5.25368	7.00489	5.89025	0	0.800488	-0.251393	0	0.415033	0.164999	Synpcc7942_2127	Dusk	0	2.20042	-0.892297	0	-0.354333	0.494196
360	2207358	2207735	2207464	0	5.98564	5.0649	4.5075	6.36088	5.48537	6.9438	0	-0.240971	-0.409179	0	-0.213638	0.126499		0	0	0	0	0	0	0
361	2216293	2216688	2216570	4.87139e-223	3.15602	1.48774	3.33686	3.82014	4.55716	4.6578	0	-1.08499	0.0803839	0	0.254511	0.286025	Synpcc7942_2137	Dusk	0	-1.46729	-0.235424	0	0.325591	-0.036445
362	2228104	2228364	2228271	0	2.19936	5.16498	4.07027	6.38684	2.6445	1.30337	0	1.23168	0.888044	0	-1.2721	-2.29286		0	0	0	0	0	0	0
363	2263302	2263596	2263501	3.39344e-142	1.72313	1.51584	0.65296	1.50476	1.76968	3.87755	0	-0.184913	-1.39996	0	0.233956	1.36561		0	0	0	0	0	0	0
364	2263818	2264152	2263938	0	3.48942	4.16801	4.14899	4.60879	4.20937	4.07454	0	0.256371	0.249774	0	-0.130785	-0.17775		0	0	0	0	0	0	0
365	2280947	2281479	2281321	0	9.14798	6.13124	8.10821	9.31032	8.88416	7.36603	0	-0.577273	-0.174069	0	-0.0675955	-0.337943	Synpcc7942_R0008	0	0	-1.48613	-1.13573	0	2.40491	2.59202
366	2282544	2282960	2282631	0	3.32205	1.98959	2.44667	3.04277	3.55219	5.35802	0	-0.739604	-0.441251	0	0.223323	0.816315		0	0	0	0	0	0	0
367	2288377	2289167	2288968	0	10.8289	11.7319	10.0128	9.40252	9.0233	8.68233	0	0.115551	-0.113033	0	-0.0593924	-0.114965	Synpcc7942_2212	0	0	1.04345	1.52419	0	-0.526663	-1.24143
368	2292576	2292895	2292745	3.58732e-238	0.747152	5.1988	2.50628	0.650211	0.624881	0.152881	0	2.7987	1.74607	0	-0.0573256	-2.0885	Synpcc7942_2217	0	0	1.16934	1.81476	0	-0.406297	-2.99523
369	2293720	2293928	2293935	1.05602e-123	1.00931	4.74759	3.85811	1.49922	0.146799	0.861047	0	2.23383	1.93453	0	-3.3523	-0.800045	Synpcc7942_2220	0	0	1.67209	1.91474	0	-0.851946	-3.04701
370	2294923	2295269	2295214	0	1.36224	5.48442	2.94739	0.716686	0.328146	0.122405	0	2.00936	1.11345	0	-1.127	-2.54968	Synpcc7942_2224	0	0	1.87934	1.77931	0	-1.30074	-3.13307
371	2295321	2295681	2295625	0	0.980041	7.75985	1.33604	0.586083	0.150399	0.00439946	0	2.98511	0.447052	0	-1.96231	-7.05763	Synpcc7942_2225	0	0	1.91148	1.86126	0	-1.58032	-3.23964
372	2298800	2300279	2299824	0	11.2946	13.0315	11.0455	8.27993	7.84412	8.03162	0	0.206371	-0.0321813	0	-0.0780074	-0.0439274	Synpcc7942_2232	Dawn	0	2.41405	1.86441	0	-2.64798	-3.08115
372	2298800	2300279	2299824	0	11.2946	13.0315	11.0455	8.27993	7.84412	8.03162	0	0.206371	-0.0321813	0	-0.0780074	-0.0439274	Synpcc7942_2234	0	0	0.352944	0.393767	0	-0.0937854	-0.575669
373	2305763	2306016	2305921	8.87789e-133	4.21516	1.93814	1.97916	3.06935	2.12378	3.01277	0	-1.12092	-1.0907	0	-0.531295	-0.0268419	Synpcc7942_2240	Dawn	0	-0.192397	-0.264076	0	0.209361	0.0238311
374	2309357	2310155	2309694	0	5.27637	4.56682	6.32626	4.06333	3.48575	3.73381	0	-0.208357	0.261806	0	-0.221194	-0.122012	Synpcc7942_2243	Dusk	0	-0.479409	-0.538385	0	1.01196	0.817873
375	2310156	2310915	2310562	0	3.12042	1.69377	3.90031	4.65145	5.17483	3.31922	0	-0.881498	0.32185	0	0.153832	-0.486837	Synpcc7942_2245	0	0	-1.42417	-0.406502	0	0.715611	-0.254934
376	2315028	2315461	2315131	0	2.60512	0.977537	0.569692	1.12276	3.31152	11.8331	0	-1.41413	-2.1931	0	1.56045	3.39771		0	0	0	0	0	0	0
377	2318147	2318638	2318327	0	4.6814	8.93526	8.05934	7.90232	4.43015	3.74948	0	0.93257	0.783723	0	-0.834921	-1.07559		0	0	0	0	0	0	0
378	2324835	2325944	2325155	0	16.0916	8.99176	5.8461	7.33228	11.5396	14.2101	0	-0.839636	-1.46076	0	0.654255	0.954582	Synpcc7942_2254	Dusk	0	-1.82046	-2.28566	0	1.5013	4.49372
378	2324835	2325944	2325155	0	16.0916	8.99176	5.8461	7.33228	11.5396	14.2101	0	-0.839636	-1.46076	0	0.654255	0.954582	Synpcc7942_2255	0	0	-0.740468	-0.803538	0	0.362031	0.563492
379	2326531	2327095	2326904	0	6.95073	4.04634	4.3506	5.5484	4.17565	7.69459	0	-0.780548	-0.675949	0	-0.410072	0.471774	Synpcc7942_2257	0	0	-0.126988	-0.0451263	0	-0.133829	0.171328
379	2326531	2327095	2326904	0	6.95073	4.04634	4.3506	5.5484	4.17565	7.69459	0	-0.780548	-0.675949	0	-0.410072	0.471774	Synpcc7942_2258	0	0	0.135674	0.0889713	0	-0.692719	-0.318094
380	2329113	2329586	2329408	7.62267e-223	3.65078	2.41639	4.98964	4.39886	2.6586	2.88843	0	-0.595354	0.450732	0	-0.726462	-0.606842	Synpcc7942_2260	0	0	1.23395	1.54531	0	-0.614985	-0.874515
381	2332471	2333130	2332970	0	2.96443	6.71104	3.78568	4.46987	5.61852	4.61649	0	1.17878	0.352797	0	0.329957	0.046563	Synpcc7942_2264	0	0	0.25268	-0.151556	0	0.663874	0.48184
382	2335680	2335978	2335771	9.35938e-307	3.13473	2.44801	2.88563	1.93152	2.11065	4.40376	0	-0.356733	-0.119458	0	0.127949	1.189	Synpcc7942_2267	Dusk	0	-0.28044	-0.0884395	0	0.563132	0.481797
383	2343428	2343745	2343578	0	4.51232	3.72018	4.16468	4.14558	3.99396	3.04933	0	-0.278496	-0.115664	0	-0.0537555	-0.443084	Synpcc7942_R0011	0	0	-0.859854	-0.0897259	0	1.80263	0.915065
384	2368505	2368851	2368707	4.05932e-149	3.15407	3.13427	0.810962	1.77703	3.72447	5.42265	0	-0.00908693	-1.95951	0	1.06757	1.60953		0	0	0	0	0	0	0
385	2369428	2369881	2369648	0	6.99419	7.02043	8.14044	5.51808	5.10956	4.04379	0	0.00540378	0.21895	0	-0.110967	-0.44846	Synpcc7942_2300	0	0	1.55139	1.51509	0	-0.823361	-1.0225
386	2372218	2372649	2372455	4.33161e-282	2.98454	4.33548	2.79493	3.38933	2.3652	1.6999	0	0.538682	-0.094696	0	-0.519043	-0.995556		0	0	0	0	0	0	0
387	2373995	2374536	2374185	0	5.25271	1.49123	2.04745	2.5509	3.44984	3.71686	0	-1.81656	-1.35923	0	0.435525	0.543078		0	0	0	0	0	0	0
388	2379195	2379771	2379527	0	9.91654	10.593	10.4471	7.77213	7.59303	8.44957	0	0.0951965	0.0751914	0	-0.0336354	0.120568		0	0	0	0	0	0	0
389	2383114	2384093	2383780	0	3.34532	8.03166	6.00621	5.57285	2.2082	1.58526	0	1.26355	0.844309	0	-1.33555	-1.8137	Synpcc7942_2314	0	0	2.19223	0.941586	0	-0.629838	-2.90376
389	2383114	2384093	2383780	0	3.34532	8.03166	6.00621	5.57285	2.2082	1.58526	0	1.26355	0.844309	0	-1.33555	-1.8137	Synpcc7942_2315	Dawn	0	0.548869	1.0573	0	-0.87693	-2.16077
390	2385191	2385786	2385419	2.48541e-231	2.18901	3.80183	2.58789	2.40321	1.14561	1.90962	0	0.796418	0.241499	0	-1.06885	-0.331679		0	0	0	0	0	0	0
391	2390002	2390275	2390119	0	2.70628	1.547	1.66328	2.036	8.25408	8.12727	0	-0.806834	-0.702279	0	2.01937	1.99703	Synpcc7942_2321	0	0	-1.34965	-0.767925	0	1.28257	0.918293
392	2398414	2399969	2398695	0	4.33483	11.0341	9.99164	6.49081	2.73282	3.73803	0	1.34792	1.20475	0	-1.24801	-0.796121		0	0	0	0	0	0	0
393	2403898	2404572	2404460	0	5.6379	2.38335	3.50489	5.19337	5.94976	4.27973	0	-1.24217	-0.685792	0	0.196159	-0.279152	Synpcc7942_2336	Dusk	0	-1.0104	-1.30809	0	1.55722	1.97203
394	2407695	2408071	2407891	0	7.4893	6.95537	5.13666	7.54972	8.78388	9.61813	0	-0.106704	-0.544001	0	0.218434	0.349333		0	0	0	0	0	0	0
395	2410722	2411543	2411110	0	6.85567	0.683987	2.31605	5.31492	7.17258	5.54428	0	-3.32526	-1.56563	0	0.432445	0.0609521	Synpcc7942_2342	Dawn	0	-3.23256	-1.7179	0	0.328049	-0.18702
395	2410722	2411543	2411110	0	6.85567	0.683987	2.31605	5.31492	7.17258	5.54428	0	-3.32526	-1.56563	0	0.432445	0.0609521	Synpcc7942_2344	0	0	-0.778732	-0.359844	0	0.275815	0.332361
396	2412677	2413479	2413289	0	9.19976	5.32552	7.30665	6.73993	5.30646	6.17446	0	-0.788674	-0.332386	0	-0.344984	-0.126421	Synpcc7942_2345	0	0	1.65222	2.00993	0	-1.23875	-1.21373
396	2412677	2413479	2413289	0	9.19976	5.32552	7.30665	6.73993	5.30646	6.17446	0	-0.788674	-0.332386	0	-0.344984	-0.126421	Synpcc7942_2346	Dusk	0	-0.0120131	0.116778	0	-0.00640995	1.25184
397	2419410	2420736	2420201	0	6.43899	1.25407	0.623509	2.03025	15.4661	15.7098	0	-2.36022	-3.36835	0	2.92938	2.95193	Synpcc7942_2352	Dusk	0	-5.68717	-4.50531	0	4.24988	3.90933
397	2419410	2420736	2420201	0	6.43899	1.25407	0.623509	2.03025	15.4661	15.7098	0	-2.36022	-3.36835	0	2.92938	2.95193	Synpcc7942_2353	0	0	-1.47978	-1.7757	0	2.69605	2.54774
398	2421505	2422138	2421790	5.10734e-229	2.67926	4.89301	4.23115	2.82648	2.93691	1.6141	0	0.868888	0.659214	0	0.0552909	-0.808276	Synpcc7942_2354	0	0	0.665701	0.618392	0	-0.103891	-0.313079
399	2432383	2433167	2432968	0	7.44235	3.43149	3.05926	4.58378	5.76836	8.20511	0	-1.11692	-1.28257	0	0.331625	0.839986	Synpcc7942_2366	0	0	-1.06727	-1.09724	0	0.966768	1.52379
400	2433143	2433914	2433469	0	6.99121	8.27552	7.3953	6.40581	6.57487	4.76796	0	0.243307	0.081066	0	0.0375829	-0.426008	Synpcc7942_2367	Dusk	0	-2.06437	-2.2856	0	2.2394	2.16808
400	2433143	2433914	2433469	0	6.99121	8.27552	7.3953	6.40581	6.57487	4.76796	0	0.243307	0.081066	0	0.0375829	-0.426008	Synpcc7942_2368	0	0	-0.517299	-0.718207	0	0.511392	0.500222
401	2447678	2448204	2447995	0	7.52616	7.74822	9.21056	7.97966	5.88021	4.31201	0	0.0419522	0.291376	0	-0.440459	-0.887966	Synpcc7942_2380	0	0	-0.295953	-0.482396	0	0.785247	1.21951
402	2460238	2460529	2460373	1.06628e-144	2.29615	0.459596	0.446301	0.600848	2.63502	3.94953	0	-2.32078	-2.36313	0	2.13274	2.71661	Synpcc7942_2388	Dusk	0	-2.76255	-1.86614	0	2.34815	3.28334
403	2471148	2471486	2471292	2.40861e-244	4.04157	2.5164	5.24013	3.51041	4.01613	2.95217	0	-0.683555	0.374687	0	0.194167	-0.249862	Synpcc7942_2395	0	0	-0.432303	-0.221702	0	0.0724113	0.248129
404	2478314	2478787	2478557	0	4.54673	5.68352	6.7268	5.41556	4.15774	3.09056	0	0.321955	0.565092	0	-0.381311	-0.809243	Synpcc7942_2406	0	0	0.162597	-0.125661	0	0.146652	0.985618
405	2481395	2481666	2481440	1.30667e-43	1.72076	1.48199	3.68497	0.69448	0.844431	0.879283	0	-0.215511	1.09861	0	0.282048	0.340396	Synpcc7942_2408	0	0	1.76843	2.63121	0	-1.72364	-2.36504
406	2482450	2483098	2482833	0	7.67183	4.31702	8.30999	7.29381	3.30315	2.79354	0	-0.829534	0.115277	0	-1.14283	-1.38458	Synpcc7942_2409	Dawn	0	0.943679	1.64917	0	-0.758083	-1.34743
407	2492056	2492395	2492174	4.80731e-198	2.9814	2.70401	2.98315	4.60133	3.40636	3.56541	0	-0.140888	0.000850751	0	-0.433821	-0.367984	Synpcc7942_2420	0	0	-0.392412	-0.699321	0	0.486374	0.795561
408	2498551	2499129	2498947	0	6.05286	4.0589	4.68926	3.86523	3.34838	3.73095	0	-0.57653	-0.368257	0	-0.207089	-0.0510107	Synpcc7942_2426	Dawn	0	0.0720705	0.342652	0	0.176556	-0.384157
409	2507523	2507792	2507579	0	3.52346	1.73171	2.39887	2.75383	2.39328	4.25789	0	-1.02479	-0.554635	0	-0.202446	0.6287	Synpcc7942_2434	0	0	-0.118792	0.0383557	0	0.823996	0.520261
410	2513811	2514795	2513962	0	5.48311	4.80546	6.02857	4.76449	4.78438	6.66857	0	-0.19032	0.13682	0	0.00600882	0.485056	Synpcc7942_2439	0	0	0.691496	0.684855	0	-0.762592	-0.547995
411	2517505	2517858	2517713	0	3.62961	3.83738	2.95348	3.36529	4.54531	6.95505	0	0.0803061	-0.297401	0	0.433647	1.04733	Synpcc7942_2440	0	0	-0.0521456	0.0436716	0	0.419957	0.841085
412	2518069	2518383	2518116	0	4.45623	0.790916	3.4385	4.22913	7.86909	9.79065	0	-2.49423	-0.374047	0	0.895835	1.21104	Synpcc7942_2440	0	0	-0.0521456	0.0436716	0	0.419957	0.841085
413	2522837	2523309	2522978	2.48705e-210	3.91307	2.62193	2.61551	4.96747	3.71814	2.39696	0	-0.577673	-0.581206	0	-0.417929	-1.0513	Synpcc7942_2445	0	0	0.644554	0.513466	0	-0.554649	-0.0268429
414	2531841	2532163	2532026	7.21707e-233	4.95777	2.14835	1.24718	3.20353	3.75905	4.29835	0	-1.20646	-1.99102	0	0.230708	0.424123	Synpcc7942_2453	Dusk	0	-0.350471	-0.484656	0	-0.172577	-0.31765
415	2538225	2538783	2538377	0	5.45459	6.69853	6.01931	6.4711	3.93152	3.88486	0	0.296376	0.142127	0	-0.718922	-0.736148	Synpcc7942_R0016	0	0	-1.55275	-1.17446	0	2.56559	2.60964
416	2545259	2545514	2545380	1.18949e-95	4.34488	1.84214	5.3216	4.97412	2.61561	1.77792	0	-1.23794	0.292545	0	-0.927296	-1.48425	Synpcc7942_2463	Dusk	0	0.225134	0.718101	0	-0.744543	-1.53222
417	2546400	2547193	2546769	0	3.69534	7.33082	4.82543	9.36333	2.8274	2.63921	0	0.988266	0.384948	0	-1.72755	-1.82691	Synpcc7942_2465	0	0	-0.378572	-0.382724	0	0.950244	0.792226
418	2548460	2548730	2548612	3.90984e-103	0.865062	2.01418	4.01867	1.41498	0.25031	0.525409	0	1.21932	2.21584	0	-2.49899	-1.42927	Synpcc7942_2468	0	0	2.36408	1.11234	0	-0.61704	-1.98026
419	2552436	2552743	2552577	1.73936e-144	3.45224	2.52918	4.13014	4.44262	2.90476	2.10629	0	-0.448862	0.258656	0	-0.612991	-1.07671	Synpcc7942_2471	0	0	0.465321	0.838484	0	-0.447389	-0.563545
420	2554800	2555132	2554937	0	5.61215	1.94129	4.64171	4.42297	4.62751	4.3117	0	-1.53154	-0.273897	0	0.0652218	-0.0367562	Synpcc7942_2473	0	0	-0.787665	-0.897674	0	0.233533	0.345426
421	2558084	2558827	2558193	0	2.91308	2.04312	2.11629	2.31235	4.30763	7.30821	0	-0.511773	-0.461012	0	0.897536	1.66016	Synpcc7942_2476	Dusk	0	-1.30554	-0.880804	0	1.28773	1.14828
422	2564389	2565391	2565185	0	6.01187	7.26194	4.50829	3.69773	2.1699	3.29183	0	0.272542	-0.415232	0	-0.76901	-0.16775	Synpcc7942_2483	0	0	-0.254656	-0.518033	0	-0.860251	0.208208
423	2568125	2568468	2568348	0	5.02193	3.52707	2.92509	5.23575	4.97689	3.72331	0	-0.509772	-0.77976	0	-0.0731526	-0.491811	Synpcc7942_2486	Dusk	0	-0.72992	-0.533094	0	1.87759	1.84169
423	2568125	2568468	2568348	0	5.02193	3.52707	2.92509	5.23575	4.97689	3.72331	0	-0.509772	-0.77976	0	-0.0731526	-0.491811	Synpcc7942_2487	Dusk	0	-0.393975	-0.291296	0	0.950032	0.494049
424	2570788	2571297	2571136	0	6.37625	4.57226	4.86625	6.64401	3.99814	2.66429	0	-0.479803	-0.389899	0	-0.732726	-1.3183		0	0	0	0	0	0	0
425	2581418	2581808	2581657	4.81652e-215	1.97495	0.169659	0.589017	1.39483	2.19786	4.43211	0	-3.54111	-1.74543	0	0.656013	1.66791	Synpcc7942_2501	0	0	-0.349063	-0.625995	0	0.799585	0.697267
426	2584080	2584627	2584389	0	1.79199	0.665666	0.936069	1.85367	5.73379	2.44587	0	-1.42869	-0.936876	0	1.6291	0.399963	Synpcc7942_2502	Dawn	0	-2.42935	-1.50073	0	1.77949	0.427271
427	2587623	2587970	2587765	1.01888e-188	3.86001	2.40254	2.61536	3.19553	3.35121	5.08992	0	-0.684047	-0.561597	0	0.0686258	0.671586	Synpcc7942_2506	0	0	-0.169686	-0.404943	0	0.78696	1.30519
428	2589788	2590561	2589922	0	5.11432	3.8082	5.13664	6.33395	4.20912	4.73949	0	-0.425433	0.00628066	0	-0.589587	-0.418374	Synpcc7942_2510	0	0	0.481759	0.593284	0	0.150185	-0.386879
429	2593080	2593376	2593210	1.00703e-117	2.42894	1.53454	3.65235	2.1032	2.7834	1.8133	0	-0.662518	0.588498	0	0.404259	-0.213973		0	0	0	0	0	0	0
430	2596400	2596868	2596625	0	5.75835	9.00125	8.38575	6.15897	5.9081	5.92788	0	0.64447	0.542284	0	-0.0599942	-0.0551729		0	0	0	0	0	0	0
431	2604975	2605411	2605097	0	8.79749	6.43286	5.70797	6.67706	5.65179	7.72157	0	-0.451632	-0.624113	0	-0.240505	0.209681	Synpcc7942_2524	0	0	1.27833	1.43215	0	-1.25097	-0.745902
432	2611063	2611707	2611294	0	8.94383	9.40026	11.2154	9.81235	7.47228	8.02695	0	0.0718085	0.326513	0	-0.393051	-0.289747	Synpcc7942_2529	0	0	-0.24679	1.33111	0	2.10748	1.69898
432	2611063	2611707	2611294	0	8.94383	9.40026	11.2154	9.81235	7.47228	8.02695	0	0.0718085	0.326513	0	-0.393051	-0.289747	Synpcc7942_2530	0	0	1.18056	1.9375	0	-0.601052	-1.3907
433	2620832	2621121	2621021	0	3.08276	6.41464	3.82944	4.59308	3.3693	2.93747	0	1.05715	0.31291	0	-0.447012	-0.644886	Synpcc7942_2538	0	0	0.124398	0.0851527	0	0.147307	0.152503
434	2622124	2622662	2622410	0	10.8284	12.1886	13.248	10.193	7.64731	7.11816	0	0.17071	0.290958	0	-0.414554	-0.518003	Synpcc7942_2540	Dusk	0	-0.294233	-0.0230131	0	1.24405	2.26937
434	2622124	2622662	2622410	0	10.8284	12.1886	13.248	10.193	7.64731	7.11816	0	0.17071	0.290958	0	-0.414554	-0.518003	Synpcc7942_R0019	0	0	1.35433	1.95347	0	-0.925577	-0.934333
435	2622657	2623395	2623086	0	7.76389	15.2544	14.2697	9.86867	6.52151	7.02589	0	0.974372	0.878107	0	-0.597651	-0.490175	Synpcc7942_R0020	0	0	-0.448168	0.139756	0	2.33362	1.8586
436	2624792	2625130	2624985	0	3.44137	2.90164	4.43166	5.93588	6.02983	6.00899	0	-0.246114	0.364863	0	0.0226559	0.0176605		0	0	0	0	0	0	0
437	2626946	2627219	2626955	5.80583e-180	2.86164	1.99152	1.6876	3.57289	2.68666	3.9253	0	-0.522971	-0.761868	0	-0.41128	0.13571	Synpcc7942_2547	0	0	-1.11217	-0.997356	0	0.81658	1.01807
438	2633416	2633831	2633664	0	5.07354	0.668464	0.40593	0.906647	4.46006	12.3497	0	-2.92407	-3.64369	0	2.29845	3.76779	Synpcc7942_2554	Dusk	0	-1.38085	-2.66875	0	1.45256	3.15513
439	2636172	2636487	2636325	1.86000000000000e-320	3.62432	1.83463	1.85666	2.39044	2.93443	7.71866	0	-0.98222	-0.965003	0	0.295799	1.69107		0	0	0	0	0	0	0
440	2638157	2638619	2638390	0	10.6978	8.50785	9.38192	8.95263	7.12288	8.79142	0	-0.330445	-0.189357	0	-0.329851	-0.0262153	Synpcc7942_2559	0	0	1.24848	1.37025	0	-0.96973	-0.8282
441	2639827	2640341	2640125	7.62732e-203	1.85778	1.53704	3.74981	3.99712	1.47398	2.43566	0	-0.273421	1.01324	0	-1.43925	-0.714648	Synpcc7942_2561	Dawn	0	0.502484	0.797213	0	-0.53664	-0.655071
442	2648635	2649095	2648791	0	4.50631	5.36213	6.87871	5.33534	2.34289	1.43012	0	0.250861	0.610193	0	-1.18729	-1.89944		0	0	0	0	0	0	0
443	2660444	2660737	2660555	0	6.32173	8.00694	8.40002	4.21709	2.71021	3.21598	0	0.340931	0.410072	0	-0.637844	-0.390989		0	0	0	0	0	0	0
444	2666627	2667182	2666952	0	7.48762	8.98976	9.91787	8.71377	6.80731	6.9027	0	0.263774	0.405522	0	-0.356211	-0.336137	Synpcc7942_R0023	0	0	-0.115278	-0.162728	0	1.4156	1.44558
445	2672955	2673216	2673052	2.56849e-132	2.90622	1.93305	5.28942	4.99254	5.04649	2.74828	0	-0.588259	0.863967	0	0.0155078	-0.861246	Synpcc7942_2589	0	0	0.18148	0.62219	0	0.10782	-0.390608
446	2673982	2674267	2674142	1.73421e-156	1.1417	1.08114	0.494385	0.369688	1.33051	4.12368	0	-0.0786199	-1.20747	0	1.8476	3.47955	Synpcc7942_2591	Dusk	0	-3.53812	-3.07037	0	3.38259	5.37621
447	2678647	2679074	2678783	0	3.76866	4.25436	5.0932	5.49318	2.89853	3.0731	0	0.174891	0.434523	0	-0.922318	-0.837948	Synpcc7942_2596	Dawn	0	-0.205047	-0.148527	0	0.089206	-0.525227
448	2683669	2684390	2683969	0	1.15979	0.283816	0.395362	0.974429	5.03219	2.3826	0	-2.03083	-1.55262	0	2.36856	1.28991	Synpcc7942_2601	0	0	-1.95698	-1.01296	0	3.0833	2.68495
448	2683669	2684390	2683969	0	1.15979	0.283816	0.395362	0.974429	5.03219	2.3826	0	-2.03083	-1.55262	0	2.36856	1.28991	Synpcc7942_2602	Dusk	0	-1.52996	-0.814146	0	3.18577	2.78128
449	2687744	2688239	2688066	0	6.97917	2.83516	3.6001	4.5616	8.22649	7.91493	0	-1.29963	-0.955017	0	0.850739	0.795037	Synpcc7942_2605	0	0	-0.904896	-0.974338	0	1.0261	1.07482
450	2693613	2694021	2693814	2.8044e-154	2.17553	1.32346	3.78755	4.12401	1.57213	1.54175	0	-0.717058	0.799898	0	-1.39132	-1.41947	Synpcc7942_2612	0	0	0.317543	0.563834	0	0.0576775	-0.461528
451	7	285	111	7.47729e-128	4.19741	2.84103	3.73614	3.72068	3.8235	1.97385	0	-0.563084	-0.167951	0	0.0393299	-0.914555		0	0	0	0	0	0	0

## Sheet: Replicate 1
					Enrichment over mock at peak max location						Log2 normalized change in enrichment from original condition								Log2 normalized change in gene target expression from original condition
					Minutes in High Light pulse			Minutes in Shade pulse			Minutes in High Light pulse			Minutes in Shade pulse					Minutes in High Light pulse			Minutes in Shade pulse
					0	15	60	0	15	60	0	15	60	0	15	60			0	15	60	0	15	60
					Hours since dawn			Hours since dawn			Hours since dawn			Hours since dawn					Hours since dawn			Hours since dawn
RNAP Peak #	Start	End	Peak max location	Q-value	8	8.25	9	8	8.25	9	8	8.25	9	8	8.25	9	Gene target of peak	High confidence class of gene target	8	8.25	9	8	8.25	9
1	11	324	139	1.89797e-138	2.93534	3.10034	4.38563	3.74272	2.64357	2.25223	0	0.0789005	0.579259	0	-0.501597	-0.73273		0	0	0	0	0	0	0
2	8809	9081	8952	2.21084e-105	3.10161	3.41243	4.04929	3.20949	2.79243	2.06564	0	0.137783	0.384654	0	-0.200821	-0.635755	Synpcc7942_0008	0	0	0.572816	-0.306256	0	0.399974	-0.329588
3	11721	12455	12022	0	8.63718	10.1957	9.14061	7.33263	7.27866	6.66148	0	0.239333	0.0817309	0	-0.010658	-0.138487	Synpcc7942_0012	0	0	0.425146	1.2217	0	0.425946	0.476063
3	11721	12455	12022	0	8.63718	10.1957	9.14061	7.33263	7.27866	6.66148	0	0.239333	0.0817309	0	-0.010658	-0.138487	Synpcc7942_0013	0	0	1.21077	-1.12939	0	-2.22239	-1.29046
4	13981	14297	14138	8.61424e-100	2.12758	1.59699	1.09483	1.06712	1.98173	3.79711	0	-0.413859	-0.958498	0	0.893034	1.83117		0	0	0	0	0	0	0
5	40872	41309	41118	0	6.75164	7.1848	8.09811	7.59342	5.49448	4.54291	0	0.0897094	0.262348	0	-0.466767	-0.741131	Synpcc7942_0042	0	0	0.584572	1.13673	0	-0.494583	-0.557808
6	44939	45296	45126	1.37425e-89	3.74392	1.61304	1.60621	1.77568	2.06351	2.86962	0	-1.21477	-1.22089	0	0.216733	0.692489	Synpcc7942_0046	0	0	-0.749419	-1.22428	0	0.507881	0.862748
7	48391	49196	48798	0	4.3562	2.7456	2.64751	2.65876	3.17576	4.04024	0	-0.665951	-0.718435	0	0.256347	0.603685		0	0	0	0	0	0	0
8	49228	49834	49439	0	6.54703	4.75574	4.56021	5.88891	5.18781	5.84505	0	-0.461169	-0.521739	0	-0.182875	-0.0107844	Synpcc7942_0048	0	0	-0.890142	-1.35981	0	1.34497	1.46539
9	49821	50940	49993	0	8.70625	6.66082	6.15762	5.96199	5.64607	7.5587	0	-0.386351	-0.499679	0	-0.0785472	0.342343	Synpcc7942_0050	0	0	0.255073	-0.275882	0	1.12829	0.671129
10	50180	50948	50558	0	3.09951	2.52232	2.51138	3.15335	3.67993	3.8184	0	-0.29729	-0.30356	0	0.222792	0.27608	Synpcc7942_0049	0	0	-1.38635	-1.28063	0	0.951977	1.66111
11	64883	65743	65543	0	4.36984	1.7234	2.60647	4.07321	4.6109	3.89076	0	-1.34232	-0.745487	0	0.17888	-0.0661141	Synpcc7942_0065	0	0	-1.10262	-0.578856	0	0.320073	0.384265
12	68857	69203	69026	2.35405e-165	0.861662	0.279632	0.243496	0.315884	1.34746	3.9601	0	-1.62359	-1.82323	0	2.09278	3.64807	Synpcc7942_0069	Dusk	0	-3.83449	-2.90775	0	2.80474	4.64553
13	81269	81542	81438	4.4639e-210	4.84411	3.43289	3.52088	4.074	4.27134	4.67084	0	-0.496809	-0.460294	0	0.0682432	0.197239		0	0	0	0	0	0	0
14	87539	88110	87809	0	10.0073	11.8248	11.1973	8.01461	5.50095	5.98467	0	0.240767	0.162091	0	-0.542952	-0.42136	Synpcc7942_R0025	0	0	-1.89862	0.0390043	0	1.89713	1.82362
15	93125	93793	93386	0	7.52954	6.70469	7.3122	5.9215	4.69726	4.07442	0	-0.167392	-0.042257	0	-0.334143	-0.539368	Synpcc7942_0095	0	0	0.0984561	-0.219796	0	0.291745	-0.0401551
16	100001	100249	100130	4.92063e-81	2.7214	3.13544	3.89057	3.39598	2.52184	2.73242	0	0.204321	0.515632	0	-0.42935	-0.313648	Synpcc7942_0098	0	0	-0.200783	0.153405	0	-0.099418	0.0749602
17	101003	101479	101115	0	4.65973	4.40927	4.23809	5.30935	5.54999	5.92457	0	-0.079705	-0.13683	0	0.0639498	0.158175	Synpcc7942_0100	Dusk	0	-3.96002	-2.75936	0	3.0796	4.45288
17	101003	101479	101115	0	4.65973	4.40927	4.23809	5.30935	5.54999	5.92457	0	-0.079705	-0.13683	0	0.0639498	0.158175	Synpcc7942_0101	Dawn	0	0.684045	0.296839	0	-0.629991	-0.164333
18	113089	113443	113233	1.4162e-206	3.28918	3.6951	5.0797	4.35095	2.87056	1.62348	0	0.167885	0.627016	0	-0.599997	-1.42224	Synpcc7942_0114	Dawn	0	0.270407	0.609722	0	-0.57927	-1.52576
19	116791	117172	116935	2.32793e-98	2.78793	4.175	3.68897	4.72929	3.04402	2.98999	0	0.582579	0.404023	0	-0.635645	-0.661482	Synpcc7942_0118	0	0	0.328168	0.294469	0	0.0735316	-0.079647
20	119092	119450	119249	0	9.33932	0.658544	1.36509	3.35052	8.13256	9.82362	0	-3.82596	-2.77432	0	1.27932	1.55187		0	0	0	0	0	0	0
21	121109	121540	121269	0	5.22289	4.94824	4.54859	4.08766	3.32592	3.5959	0	-0.0779344	-0.199428	0	-0.297524	-0.184926		0	0	0	0	0	0	0
22	126049	126421	126198	7.71029e-64	2.8652	2.71883	3.63021	3.80199	2.77557	2.13313	0	-0.0756526	0.341416	0	-0.45397	-0.833785	Synpcc7942_0126	0	0	0.675428	1.41962	0	-0.856921	-1.3928
22	126049	126421	126198	7.71029e-64	2.8652	2.71883	3.63021	3.80199	2.77557	2.13313	0	-0.0756526	0.341416	0	-0.45397	-0.833785	Synpcc7942_0127	0	0	-0.362962	0.438284	0	-0.980061	-0.66198
23	139932	140501	140226	0	4.82419	3.23849	3.53901	5.58378	7.09964	7.49222	0	-0.574965	-0.44694	0	0.346504	0.424153	Synpcc7942_0139	0	0	-0.4305	-0.404157	0	0.81286	0.914379
24	141364	141926	141649	7.26937e-161	2.87712	1.73528	2.09265	3.13225	3.86889	2.8736	0	-0.729455	-0.459292	0	0.304721	-0.124342		0	0	0	0	0	0	0
25	145799	146298	146045	0	4.99694	5.23908	5.99304	5.20847	5.3175	4.07919	0	0.0682689	0.262243	0	0.0298891	-0.352579	Synpcc7942_0143	0	0	-0.0684366	0.43158	0	0.414699	0.292951
26	156119	156521	156259	0	6.02321	5.79297	4.96839	5.45738	5.58449	6.09941	0	-0.0562278	-0.277752	0	0.033215	0.160459	Synpcc7942_0152	0	0	0.902244	0.936957	0	-0.322672	-0.142889
27	159340	159773	159543	1.46275e-264	5.29907	2.17011	2.29685	2.97263	5.69196	5.91323	0	-1.28797	-1.20609	0	0.937184	0.992205	Synpcc7942_0157	0	0	-1.72296	-1.4029	0	1.58196	1.23391
28	160946	161427	161266	0	4.81844	6.0584	6.09115	6.78606	4.89008	4.48992	0	0.33037	0.338146	0	-0.472718	-0.595886	Synpcc7942_0158	0	0	0.716456	0.794434	0	-0.566747	-0.37702
29	163278	163609	163418	9.13558e-131	2.16509	2.64098	2.59185	3.42897	3.85943	3.19474	0	0.286643	0.259549	0	0.170612	-0.102074		0	0	0	0	0	0	0
30	164371	164785	164548	2.86245e-202	3.23857	4.20656	3.49648	4.97805	4.93636	4.62952	0	0.377282	0.110545	0	-0.0121339	-0.104718	Synpcc7942_0165	Dusk	0	0.489041	0.138433	0	-0.393986	0.379786
31	166313	166816	166533	0	9.58145	12.2244	11.3544	8.39315	6.27082	6.81396	0	0.351444	0.244941	0	-0.420558	-0.300719		0	0	0	0	0	0	0
32	170633	171070	170749	0	7.5299	4.77263	5.2431	4.7293	5.88067	8.29611	0	-0.657844	-0.522211	0	0.314355	0.810808		0	0	0	0	0	0	0
33	179210	180364	179572	0	1.40089	0.587524	0.779549	1.43408	4.04121	2.73772	0	-1.25363	-0.845634	0	1.49466	0.932845	Synpcc7942_0181	0	0	-0.60926	-1.02353	0	2.69278	2.1961
34	188938	189394	189241	0	4.80519	6.19022	6.30534	8.93742	6.10974	4.72743	0	0.365399	0.391982	0	-0.548749	-0.918802	Synpcc7942_0189	0	0	0.334167	0.390223	0	-0.182648	-0.182821
35	192278	192595	192401	2.2726e-187	2.49066	0.719898	0.747598	1.832	4.86195	5.23056	0	-1.79066	-1.73619	0	1.40812	1.51354	Synpcc7942_0192	0	0	-0.444133	-0.813357	0	1.29644	1.00361
36	198687	199094	198914	5.11804e-240	1.20856	6.44774	3.35811	1.96404	1.11029	1.16106	0	2.41551	1.47437	0	-0.822893	-0.758378		0	0	0	0	0	0	0
37	203864	204195	204027	1.335e-80	2.08043	1.34804	1.14493	2.18399	3.67237	3.43706	0	-0.626021	-0.861627	0	0.749747	0.654214		0	0	0	0	0	0	0
38	205978	206442	206206	0	3.64694	2.76461	2.41859	3.91186	3.56119	4.25106	0	-0.399614	-0.592523	0	-0.135494	0.11997		0	0	0	0	0	0	0
39	217660	217999	217782	1.35601008823820e-310	3.57917	0.631529	0.857719	2.92153	6.36082	6.06157	0	-2.5027	-2.06105	0	1.12249	1.05297	Synpcc7942_0215	Dusk	0	-3.43166	-2.64247	0	1.97929	1.91839
40	218937	219382	219165	9.43951e-193	2.63853	5.36475	4.16107	3.519	2.43853	2.188	0	1.02378	0.657222	0	-0.529151	-0.685551		0	0	0	0	0	0	0
41	219705	220261	219919	0	8.37741	9.71605	8.66735	8.64605	6.84692	7.09629	0	0.213866	0.049086	0	-0.336585	-0.284975	Synpcc7942_R0029	0	0	2.71669	0.0182457	0	#NAME?	-2.44584
42	223828	224426	224023	0	5.54187	6.473	7.50479	7.46243	5.57062	4.00744	0	0.224061	0.437437	0	-0.421808	-0.896964	Synpcc7942_0224	0	0	-0.00732292	-0.418102	0	-0.257892	-1.03738
42	223828	224426	224023	0	5.54187	6.473	7.50479	7.46243	5.57062	4.00744	0	0.224061	0.437437	0	-0.421808	-0.896964	Synpcc7942_0225	0	0	0.330766	0.0448044	0	0.106559	-0.37777
43	231752	232766	232052	1.62300000000000e-320	1.48455	0.304977	0.3072	1.03071	4.40503	3.28845	0	-2.28325	-2.27278	0	2.09552	1.67378		0	0	0	0	0	0	0
44	238240	238719	238532	0	0.846027	10.3193	2.1503	0.76091	0.650841	1.10882	0	3.6085	1.34576	0	-0.22542	0.543229	Synpcc7942_0243	Dusk	0	4.27937	1.42504	0	0.0936107	0.0766852
45	242045	242479	242218	7.71988e-177	2.68387	0.788856	1.05957	1.4428	4.10038	5.21479	0	-1.76648	-1.34084	0	1.50688	1.85373	Synpcc7942_0245	Dusk	0	-2.33872	-1.58077	0	1.45376	2.20725
45	242045	242479	242218	7.71988e-177	2.68387	0.788856	1.05957	1.4428	4.10038	5.21479	0	-1.76648	-1.34084	0	1.50688	1.85373	Synpcc7942_0246	0	0	-0.245479	-0.130995	0	-0.652796	-0.933333
46	258262	258600	258457	3.9376e-194	3.48698	5.63013	4.98506	4.79852	3.99042	3.96593	0	0.691188	0.515632	0	-0.266048	-0.274932	Synpcc7942_0260	0	0	0.0255405	-0.311829	0	0.246643	-0.243962
47	259038	259580	259152	5.6791e-144	2.01678	3.75344	3.42059	4.0999	2.66175	2.26903	0	0.896158	0.762193	0	-0.623217	-0.853515	Synpcc7942_0262	0	0	0.293383	0.477449	0	0.135599	0.00485013
48	263052	263570	263400	0	2.93898	0.801848	0.770096	2.24604	8.51587	8.79769	0	-1.87391	-1.9322	0	1.92277	1.96974	Synpcc7942_0267	Dusk	0	-1.77245	-1.99052	0	2.7702	3.20719
49	279298	279673	279435	0	6.11146	5.5673	4.68009	5.43816	6.62474	7.4386	0	-0.134538	-0.38498	0	0.284745	0.451914	Synpcc7942_0282	0	0	0.611882	0.669572	0	-0.875523	-0.600483
50	280542	281199	280714	1.39271e-242	3.70108	4.03373	4.79979	5.53549	3.70232	2.50238	0	0.124169	0.375024	0	-0.580282	-1.14541	Synpcc7942_0284	Dawn	0	-0.0910119	0.146469	0	-0.409521	-1.13544
51	283932	284321	284106	2.13599e-191	3.16616	4.50306	5.32	5.26891	3.37834	2.24068	0	0.508173	0.748694	0	-0.641191	-1.23357	Synpcc7942_0289	0	0	0.345717	0.400877	0	0.102466	-0.498587
52	288091	288614	288233	8.83764e-184	3.69121	4.96164	6.06993	4.97663	3.47762	2.86825	0	0.426721	0.717586	0	-0.517068	-0.795	Synpcc7942_0291	Dusk	0	-0.726453	-0.548569	0	-0.173453	0.107486
53	290063	290687	290312	0	6.55575	3.27424	5.2651	6.78682	6.13482	3.77818	0	-1.0016	-0.3163	0	-0.145715	-0.845044	Synpcc7942_0293	Dusk	0	-0.377477	-0.550834	0	-0.954927	-1.4372
53	290063	290687	290312	0	6.55575	3.27424	5.2651	6.78682	6.13482	3.77818	0	-1.0016	-0.3163	0	-0.145715	-0.845044	Synpcc7942_0294	Dawn	0	-1.45688	-0.316671	0	-0.321386	-1.57745
54	294699	294988	294827	4.27517e-99	2.88426	4.31169	2.74646	2.60916	1.5902	2.5064	0	0.580052	-0.0706257	0	-0.714375	-0.0579676	Synpcc7942_0297	0	0	0.996976	-0.255484	0	-0.626748	-0.772994
55	299354	299689	299555	3.40338e-88	3.01938	2.69789	3.63974	3.44341	3.32264	3.47387	0	-0.162421	0.269583	0	-0.0515091	0.0127043	Synpcc7942_0300	Dawn	0	0.493516	0.839926	0	-0.948462	-1.17754
55	299354	299689	299555	3.40338e-88	3.01938	2.69789	3.63974	3.44341	3.32264	3.47387	0	-0.162421	0.269583	0	-0.0515091	0.0127043	Synpcc7942_0301	0	0	-0.112557	-0.200216	0	0.626678	0.496633
56	303616	304280	303791	2.74238e-163	3.45042	2.73368	2.27235	2.85136	3.81945	3.67377	0	-0.33593	-0.602589	0	0.421714	0.365612	Synpcc7942_0305	Dusk	0	-1.02496	-1.15643	0	0.825634	0.689836
57	308948	309362	309107	0	7.03914	1.72366	1.92531	3.66945	7.1261	6.76478	0	-2.02992	-1.8703	0	0.957547	0.882478	Synpcc7942_0309	Dusk	0	-0.89318	-0.645518	0	1.35985	0.848577
58	313992	314900	314674	0	4.25014	2.51675	3.14239	4.35621	6.33087	4.2933	0	-0.755947	-0.435645	0	0.539331	-0.0209868	Synpcc7942_0315	0	0	-0.460091	0.0578798	0	0.981032	0.52343
58	313992	314900	314674	0	4.25014	2.51675	3.14239	4.35621	6.33087	4.2933	0	-0.755947	-0.435645	0	0.539331	-0.0209868	Synpcc7942_0317	0	0	-0.136911	-0.463053	0	0.337553	0.46354
59	318318	318800	318574	0	3.71899	1.78194	1.75111	3.21493	5.91873	5.14131	0	-1.06147	-1.08665	0	0.880499	0.677348	Synpcc7942_0321	0	0	-0.891791	-0.435002	0	0.798026	0.422957
60	321943	322451	322191	9.00791e-206	4.94025	1.39853	3.06661	4.72237	4.84358	3.37019	0	-1.82067	-0.68794	0	0.0365631	-0.486683	Synpcc7942_0324	0	0	-1.06895	-0.747815	0	1.49525	0.857664
61	323087	323820	323517	0	6.37841	1.35818	4.09774	5.57206	5.2309	3.52374	0	-2.23153	-0.638368	0	-0.0911522	-0.661105	Synpcc7942_0327	0	0	-2.10922	-0.938733	0	0.118229	-0.921151
62	325750	326102	325983	7.96064e-87	4.22641	0.868087	2.13296	3.07987	3.48533	2.86626	0	-2.28352	-0.986576	0	0.178426	-0.103701	Synpcc7942_0328	0	0	-2.50086	-0.948838	0	0.106044	-0.981943
63	327217	327899	327422	0	3.46969	5.02013	7.07325	4.47939	2.72138	1.57686	0	0.532916	1.02757	0	-0.718962	-1.50625	Synpcc7942_0330	0	0	0.228486	0.77684	0	-1.45577	-2.0708
64	327869	331142	328243	0	3.64043	4.71641	6.69435	3.91148	2.30287	1.96428	0	0.373578	0.878833	0	-0.76428	-0.993715		0	0	0	0	0	0	0
65	329403	329709	329580	1.86178e-178	2.43483	2.20526	2.48683	3.21153	4.31902	4.88302	0	-0.142869	0.0304859	0	0.427444	0.604515	Synpcc7942_0334	Dawn	0	0.418199	0.683579	0	-1.98725	-2.43524
66	332555	332560	332446	1.60307e-58	1.87606	2.97765	3.98462	2.53535	0.958966	0.676865	0	0.666469	1.08674	0	-1.40263	-1.90525		0	0	0	0	0	0	0
67	339973	340944	340168	0	9.25324	9.99731	8.98352	8.13602	6.84442	6.38807	0	0.111581	-0.0426777	0	-0.249395	-0.348943	Synpcc7942_0347	0	0	0.871903	0.839228	0	-0.405799	-0.219481
68	348786	349343	349191	2.64828e-292	4.92001	4.49957	4.60096	4.72992	4.95	5.25023	0	-0.128876	-0.0967284	0	0.065614	0.150565	Synpcc7942_0356	0	0	-0.048671	-0.435212	0	0.375533	0.453222
69	354180	355015	354526	0	8.55459	5.60178	4.53081	7.77656	7.91876	8.62389	0	-0.610813	-0.916929	0	0.0261428	0.149206	Synpcc7942_0361	0	0	-0.197171	-0.103682	0	-0.53772	-0.787551
70	371695	372829	372173	0	4.60921	2.34335	2.32801	4.75129	6.33428	8.07435	0	-0.975947	-0.985418	0	0.414861	0.765026	Synpcc7942_0377	Dusk	0	-1.39848	-1.35675	0	1.50618	1.75389
70	371695	372829	372173	0	4.60921	2.34335	2.32801	4.75129	6.33428	8.07435	0	-0.975947	-0.985418	0	0.414861	0.765026	Synpcc7942_0378	Dusk	0	0.0422772	-0.302692	0	0.437271	0.910527
71	378369	378738	378547	0	5.88547	2.18094	4.41537	8.54029	9.40812	5.23039	0	-1.43221	-0.414623	0	0.139621	-0.707366		0	0	0	0	0	0	0
72	388089	388677	388466	2.54077e-220	3.61752	4.98851	4.23804	4.96855	3.88754	4.26649	0	0.46361	0.228398	0	-0.353967	-0.219775	Synpcc7942_0395	0	0	0.45502	0.821175	0	0.193839	-0.0888356
73	398132	398433	398342	5.13814e-108	4.66911	3.7788	4.48656	5.30225	3.61088	3.23839	0	-0.305219	-0.0575375	0	-0.554253	-0.711328		0	0	0	0	0	0	0
74	399805	400403	399934	1.60212e-262	2.65895	1.44755	1.61154	2.83764	4.19774	3.11697	0	-0.877243	-0.722415	0	0.564922	0.135451		0	0	0	0	0	0	0
75	403448	404107	403573	6.01244e-181	3.16117	4.76464	5.10947	5.72001	3.05693	2.33523	0	0.591911	0.692716	0	-0.903932	-1.29245	Synpcc7942_0412	0	0	0.132768	0.00871724	0	-0.164426	-0.255287
76	404916	405331	405071	7.97725e-115	3.57064	1.02567	1.22965	1.85625	4.90173	4.55871	0	-1.79962	-1.53793	0	1.4009	1.29623		0	0	0	0	0	0	0
77	405927	408189	406450	0	5.70528	0.634455	0.960825	3.62787	11.3068	9.05403	0	-3.16871	-2.56995	0	1.64	1.31944	Synpcc7942_0415	0	0	-3.56987	-1.67803	0	1.40632	1.27183
77	405927	408189	406450	0	5.70528	0.634455	0.960825	3.62787	11.3068	9.05403	0	-3.16871	-2.56995	0	1.64	1.31944	Synpcc7942_0416	0	0	-2.61387	-2.5765	0	1.47835	1.36506
78	408406	408678	408599	7.01121e-71	2.54978	0.493234	0.804963	1.73881	3.46404	3.50601	0	-2.37003	-1.66338	0	0.994354	1.01173		0	0	0	0	0	0	0
79	413184	414365	413890	0	10.7814	1.12047	2.87423	7.0227	7.81881	7.92741	0	-3.26636	-1.90729	0	0.154923	0.174824	Synpcc7942_0423	Dusk	0	-1.22173	-1.16507	0	1.34691	1.52473
80	423440	423984	423665	0	3.31006	0.638511	0.769031	2.5164	5.71268	4.17547	0	-2.37407	-2.10574	0	1.18281	0.730578		0	0	0	0	0	0	0
81	436697	437074	436870	0	5.59431	7.17753	6.76658	5.96506	4.85162	4.14541	0	0.359528	0.274468	0	-0.298071	-0.525021	Synpcc7942_0446	0	0	0.80667	1.16323	0	-0.704329	-0.791984
82	441162	442117	441793	0	9.27958	4.06004	5.64059	7.44211	8.70776	8.10101	0	-1.19257	-0.718214	0	0.22659	0.122391	Synpcc7942_0452	0	0	-1.41911	-1.19656	0	0.824727	0.345298
83	443039	443309	443201	2.60543e-61	4.04917	3.7052	4.30412	3.3788	3.04332	2.89547	0	-0.128074	0.0880915	0	-0.150868	-0.222714		0	0	0	0	0	0	0
84	445009	445616	445159	0	5.88305	3.81834	5.67509	6.62263	7.94421	4.52291	0	-0.623617	-0.0519208	0	0.2625	-0.550153	Synpcc7942_0456	0	0	-1.69137	-0.637071	0	0.783613	-0.165887
85	448343	448838	448536	0	4.77562	7.38181	7.86966	7.1575	4.87341	3.09821	0	0.628288	0.720615	0	-0.554524	-1.20802		0	0	0	0	0	0	0
86	456506	456822	456675	3.81922e-92	3.90954	4.0445	4.27394	4.60702	3.38272	3.36748	0	0.048965	0.12857	0	-0.445651	-0.452166	Synpcc7942_0469	Dawn	0	0.223741	0.231885	0	-0.216359	-0.490867
86	456506	456822	456675	3.81922e-92	3.90954	4.0445	4.27394	4.60702	3.38272	3.36748	0	0.048965	0.12857	0	-0.445651	-0.452166	Synpcc7942_0470	0	0	-1.8071	-1.66285	0	0.666818	0.338486
87	460255	460849	460567	3.05423e-155	3.8768	3.80081	4.28305	3.2917	3.22334	2.92896	0	-0.0285605	0.143771	0	-0.0302798	-0.168444	Synpcc7942_0475	0	0	-0.558277	-0.392387	0	-0.353633	-0.260718
88	491567	491842	491722	1.84024e-97	2.76556	1.72036	1.78512	2.6106	4.48467	4.12461	0	-0.684855	-0.631552	0	0.78062	0.659879		0	0	0	0	0	0	0
89	492741	493188	492915	6.82827e-129	2.32948	2.77881	4.34887	2.75965	1.67583	1.05729	0	0.254462	0.900636	0	-0.71961	-1.38411	Synpcc7942_0505	Dawn	0	0.306415	1.37549	0	-1.11651	-2.235
89	492741	493188	492915	6.82827e-129	2.32948	2.77881	4.34887	2.75965	1.67583	1.05729	0	0.254462	0.900636	0	-0.71961	-1.38411	Synpcc7942_0506	Dawn	0	0.632233	1.06469	0	-0.862721	-1.39212
90	513231	513672	513507	1.81839e-98	1.88285	3.72791	4.17034	4.33614	2.27555	2.34034	0	0.985449	1.14725	0	-0.930196	-0.889695	Synpcc7942_0529	Dusk	0	-0.0923643	-0.63471	0	0.007313	0.914889
91	518669	520414	519398	0	8.76874	1.699	3.55852	7.56617	7.10785	6.35259	0	-2.36768	-1.30109	0	-0.0901513	-0.25222	Synpcc7942_0536	0	0	0.0888715	0.352396	0	-0.541232	-1.22013
92	531824	532130	531977	2.47907e-94	2.87258	2.62739	2.63668	3.37513	3.76369	3.61113	0	-0.128715	-0.123625	0	0.157204	0.0975087		0	0	0	0	0	0	0
93	533356	534077	533565	0	10.8105	0.643526	1.73424	5.47227	6.83554	5.14568	0	-4.07029	-2.64006	0	0.320915	-0.0887779	Synpcc7942_0551	Dusk	0	-3.02284	-1.94593	0	0.662496	0.168813
94	536407	536877	536603	2.78831e-147	3.02885	3.53617	5.07669	3.65452	2.37506	1.81179	0	0.223417	0.74512	0	-0.621717	-1.01227		0	0	0	0	0	0	0
95	538890	539487	539218	7.80952e-275	3.27271	2.03798	1.91711	2.82882	4.399	4.27847	0	-0.683347	-0.771553	0	0.636977	0.596896	Synpcc7942_0556	Dusk	0	-0.929358	-0.949007	0	1.79888	1.59667
95	538890	539487	539218	7.80952e-275	3.27271	2.03798	1.91711	2.82882	4.399	4.27847	0	-0.683347	-0.771553	0	0.636977	0.596896	Synpcc7942_0557	0	0	-0.43357	0.181447	0	0.873649	1.44416
96	541795	542088	541905	3.38404e-111	3.01239	3.42094	3.85381	3.53268	2.31672	2.26467	0	0.183486	0.355376	0	-0.608681	-0.641461	Synpcc7942_0561	0	0	0.590864	0.332564	0	-0.360438	0.148651
97	546409	546740	546597	2.52788e-83	3.65302	2.222	2.09119	3.03696	3.5611	3.97283	0	-0.717231	-0.804764	0	0.229698	0.387539		0	0	0	0	0	0	0
98	551340	551993	551666	0	5.71389	2.55355	2.52323	4.34295	6.59529	4.71644	0	-1.16197	-1.1792	0	0.602759	0.11902		0	0	0	0	0	0	0
99	554729	555457	555251	0	5.83135	7.49236	8.2519	6.94824	5.08271	4.11094	0	0.361591	0.500897	0	-0.451052	-0.757182	Synpcc7942_0572	0	0	-1.58937	-1.1651	0	1.36142	1.60803
100	556880	557290	557023	0	1.45513	7.28599	2.03571	1.41574	0.936883	1.04979	0	2.32398	0.48438	0	-0.595619	-0.431461	Synpcc7942_0575	0	0	-0.519867	-0.691879	0	0.139809	0.0362065
101	558168	558644	558398	4.14257e-140	3.32551	3.29693	4.31239	5.90302	3.98064	2.5038	0	-0.0124514	0.374913	0	-0.568452	-1.23733	Synpcc7942_0578	Dawn	0	-0.247854	-0.146176	0	-0.334326	-1.25457
102	563932	564315	564102	0	5.71687	6.4117	6.76538	7.32	5.04738	3.73668	0	0.165483	0.242946	0	-0.536309	-0.970088	Synpcc7942_0583	0	0	0.866466	1.20104	0	-1.38753	-0.995807
103	568188	568490	568367	0	8.10499	9.98537	9.3018	6.68898	6.13375	6.50757	0	0.301005	0.198699	0	-0.125015	-0.0396663		0	0	0	0	0	0	0
104	577764	578273	578106	0	8.14975	2.60097	5.21369	5.75116	4.52392	4.52847	0	-1.64771	-0.64445	0	-0.346281	-0.344829	Synpcc7942_0588	0	0	-0.797144	0.718641	0	-1.26975	-1.70491
104	577764	578273	578106	0	8.14975	2.60097	5.21369	5.75116	4.52392	4.52847	0	-1.64771	-0.64445	0	-0.346281	-0.344829	Synpcc7942_0590	Dusk	0	0.613341	-0.496591	0	-1.35974	-0.195283
105	582119	582444	582236	6.67856e-77	3.63633	3.98468	3.83366	5.37042	4.10018	3.53784	0	0.131977	0.0762367	0	-0.389348	-0.602167		0	0	0	0	0	0	0
106	585529	586010	585698	1.122e-267	3.82221	4.14042	5.76086	4.01126	3.36617	3.65087	0	0.115369	0.591878	0	-0.252949	-0.135816		0	0	0	0	0	0	0
107	587296	587991	587686	0	12.8212	12.4653	10.8704	7.27264	7.69189	7.5197	0	-0.0406169	-0.238119	0	0.0808592	0.0481963		0	0	0	0	0	0	0
108	592731	593128	592930	6.91992e-111	2.54172	2.99316	3.73651	3.38287	2.83176	1.74752	0	0.235865	0.555887	0	-0.256551	-0.952943	Synpcc7942_0603	Dawn	0	0.163274	0.285254	0	0.131358	-1.06262
109	595225	595595	595381	0	4.71694	0.621397	1.1359	2.88171	7.65769	7.03439	0	-2.92427	-2.05402	0	1.40999	1.2875	Synpcc7942_0607	0	0	-1.89056	-1.79052	0	1.89573	1.06287
110	620190	620680	620399	0	8.81336	12.9644	11.5395	6.23521	4.39048	4.69413	0	0.55679	0.388817	0	-0.50606	-0.409579		0	0	0	0	0	0	0
111	623472	624232	623674	0	5.90977	6.85002	6.14016	4.91975	4.22374	4.48267	0	0.213005	0.0551734	0	-0.220065	-0.134227		0	0	0	0	0	0	0
112	624766	625473	625318	0	7.58955	6.55119	6.19677	6.37214	5.71869	5.43358	0	-0.212258	-0.292498	0	-0.156093	-0.229876		0	0	0	0	0	0	0
113	626888	627466	627246	0	8.66559	9.2047	8.208	7.18835	6.28382	6.47919	0	0.0870714	-0.0782678	0	-0.19402	-0.149848	Synpcc7942_0636	0	0	0.482062	1.06432	0	-0.356293	-0.301316
114	639229	639818	639422	1.72193e-216	4.45833	2.31319	3.6009	4.99742	6.28079	4.17205	0	-0.946619	-0.308144	0	0.329765	-0.260427		0	0	0	0	0	0	0
115	643808	644279	644045	0	6.36484	5.73976	4.19546	5.02346	4.78326	6.8083	0	-0.149133	-0.601295	0	-0.0706895	0.438611	Synpcc7942_0649	Dusk	0	-0.0183966	-0.40043	0	-0.698633	-0.36267
116	645055	645332	645229	3.01735e-50	1.35159	3.64624	3.31654	4.36926	0.954284	0.561981	0	1.43175	1.29502	0	-2.1949	-2.9588		0	0	0	0	0	0	0
117	653040	653832	653469	0	5.15143	3.28043	3.28613	3.4053	3.61111	4.69709	0	-0.65109	-0.648583	0	0.084663	0.463986		0	0	0	0	0	0	0
118	663740	664125	663975	3.31627e-259	3.93992	2.90693	2.83587	3.30118	4.52177	4.92021	0	-0.438669	-0.474376	0	0.453905	0.575738	Synpcc7942_0667	0	0	-0.55652	-0.807725	0	0.271566	0.498428
119	664173	664561	664414	2.23549e-302	2.81812	1.78024	1.76885	3.13921	4.05965	3.73651	0	-0.662659	-0.671923	0	0.370955	0.251289		0	0	0	0	0	0	0
120	666809	667105	666883	5.67859e-179	0.642851	5.98497	2.516	0.72616	0.315951	0.383603	0	3.21879	1.96857	0	-1.20059	-0.920672		0	0	0	0	0	0	0
121	671898	672793	672525	0	4.30032	1.45231	1.62275	3.80564	5.29836	6.67792	0	-1.56609	-1.406	0	0.477407	0.811259	Synpcc7942_0677	Dusk	0	-1.38719	-1.74167	0	1.69031	2.53518
122	673257	673974	673709	0	6.26013	3.35009	3.77078	6.47529	7.1195	7.0563	0	-0.901991	-0.731331	0	0.13683	0.123966	Synpcc7942_0679	0	0	-0.379511	-0.178824	0	0.220668	0.414501
123	675791	676055	675920	4.31213e-99	2.88084	3.54176	4.29921	3.30726	2.43966	2.01967	0	0.297978	0.577582	0	-0.43896	-0.711518	Synpcc7942_0682	0	0	0.477804	0.80691	0	-0.561913	-0.759748
124	678697	679019	678863	7.58271e-173	1.97219	6.42631	4.96416	2.91088	1.33333	0.987251	0	1.70419	1.33175	0	-1.12642	-1.55996	Synpcc7942_0685	0	0	1.99725	1.08852	0	-1.67238	-2.83926
125	680537	681299	680653	0	6.32017	3.24624	2.29094	5.22765	10.8102	8.91431	0	-0.961193	-1.46403	0	1.04815	0.769961	Synpcc7942_0686	Dusk	0	-0.477396	-1.64584	0	1.89009	1.45235
126	685096	685385	685221	2.05591e-138	3.90668	4.73633	3.86222	4.27292	2.41621	3.49231	0	0.277827	-0.0165121	0	-0.82248	-0.29104	Synpcc7942_0690	0	0	0.97731	0.313215	0	-0.525675	-0.293645
127	687896	688349	688142	0	7.31939	8.38516	8.0757	5.07066	5.20562	5.22998	0	0.196115	0.141863	0	0.0378948	0.0446296	Synpcc7942_0694	0	0	1.16307	1.35321	0	-0.951554	-0.772908
128	688730	689079	688927	1.42182e-93	3.68994	3.12355	2.99232	3.36483	3.37731	3.02316	0	-0.240412	-0.302333	0	0.00534042	-0.154476	Synpcc7942_0695	0	0	-0.565428	-0.524092	0	0.799529	0.104469
129	690688	691097	690823	7.09789e-145	3.70596	3.73743	4.78615	3.83439	3.13661	2.4839	0	0.0121999	0.369018	0	-0.289788	-0.626387	Synpcc7942_0697	Dawn	0	-0.707518	0.106629	0	-0.169084	-1.16524
129	690688	691097	690823	7.09789e-145	3.70596	3.73743	4.78615	3.83439	3.13661	2.4839	0	0.0121999	0.369018	0	-0.289788	-0.626387	Synpcc7942_0698	0	0	2.66483	1.97966	0	-0.511256	-1.02826
130	691480	691829	691621	5.25544e-209	4.27702	3.70795	5.20634	4.87232	4.40079	2.92956	0	-0.205983	0.283665	0	-0.146846	-0.733924		0	0	0	0	0	0	0
131	692510	692828	692667	1.65773e-125	3.57614	1.93643	2.11118	3.86033	4.6121	3.93149	0	-0.885002	-0.760351	0	0.2567	0.0263493	Synpcc7942_0700	0	0	-1.54137	-1.33876	0	1.27417	0.877481
132	701393	701736	701527	7.94062e-187	4.33192	4.69302	5.42856	4.94818	4.20353	3.54406	0	0.11551	0.325561	0	-0.235294	-0.481493		0	0	0	0	0	0	0
133	709420	710077	709706	0	10.3529	14.1775	12.7967	7.40879	5.86929	6.76782	0	0.453571	0.305737	0	-0.336053	-0.130546	Synpcc7942_0715	0	0	-0.628526	0.0467231	0	-0.94376	-1.0208
134	711033	711578	711238	0	7.94333	10.78	9.09378	7.16439	5.3684	5.55001	0	0.440543	0.195136	0	-0.416351	-0.368354	Synpcc7942_R0040	0	0	-0.168224	0.109394	0	0.693006	0.540512
135	722970	723537	723150	0	2.85796	6.34144	3.90318	4.39723	5.03207	3.75946	0	1.14982	0.449664	0	0.194557	-0.226068	Synpcc7942_0728	0	0	1.07646	-0.452803	0	1.0102	1.6352
136	751906	753683	752524	0	1.81867	1.01633	0.914082	2.54397	4.38447	3.11361	0	-0.839518	-0.992488	0	0.78532	0.291507	Synpcc7942_0759	0	0	-1.00858	-1.69408	0	2.11939	1.31337
137	759927	760781	760233	0	5.01122	0.38687	0.478496	1.70961	6.79373	10.3038	0	-3.69524	-3.38858	0	1.99054	2.59144	Synpcc7942_0768	Dusk	0	-3.3529	-3.48448	0	2.69175	3.54558
138	765825	766450	766178	2.20696e-175	4.30053	5.5139	5.13917	5.09324	4.15801	3.62404	0	0.358558	0.257021	0	-0.29269	-0.490985	Synpcc7942_0773	0	0	0.632469	0.285438	0	0.822488	0.668929
139	770004	770295	770125	2.12601e-96	2.83655	3.73686	3.89567	3.84127	3.11847	2.71744	0	0.397689	0.457735	0	-0.300743	-0.499337		0	0	0	0	0	0	0
140	773726	774037	773947	4.68957e-98	2.84853	1.22452	1.12255	1.82481	3.67908	4.83404	0	-1.218	-1.34344	0	1.0116	1.40548		0	0	0	0	0	0	0
141	785656	786104	785934	0	6.43711	8.01486	7.87313	6.3495	4.63918	3.59801	0	0.316264	0.290523	0	-0.452773	-0.819443	Synpcc7942_0790	0	0	0.586155	0.0547224	0	-1.83795	-1.38842
142	790065	790442	790223	3.30209e-231	3.6571	3.77999	3.5404	3.583	3.74974	4.4212	0	0.0476801	-0.0467887	0	0.0656201	0.30327	Synpcc7942_0794	Dusk	0	-0.0765768	-0.631804	0	0.0458371	0.0353964
143	791795	792271	791995	1.82147e-197	6.46177	1.78958	1.91845	4.05262	3.4061	3.16557	0	-1.85231	-1.75198	0	-0.250735	-0.356389	Synpcc7942_0797	Dusk	0	-0.958666	-1.58167	0	0.992268	-0.533931
144	806741	807094	806896	2.27836e-188	4.91796	3.30939	3.37452	4.64253	5.24195	5.78163	0	-0.571494	-0.543379	0	0.175193	0.316565	Synpcc7942_0812	0	0	0.0552807	-0.488991	0	0.210341	0.189507
145	812753	813088	812943	1.68253e-72	2.89905	3.72075	3.95424	4.41678	3.57155	2.29313	0	0.360014	0.447819	0	-0.306447	-0.94568	Synpcc7942_0818	0	0	0.249452	0.525561	0	-1.85665	-1.02691
146	823174	823740	823350	0	6.75041	7.79653	7.59195	6.09243	5.79296	5.09569	0	0.207858	0.169497	0	-0.0727162	-0.25774	Synpcc7942_0828	Dusk	0	-0.0770566	-0.741803	0	-0.769951	0.290855
146	823174	823740	823350	0	6.75041	7.79653	7.59195	6.09243	5.79296	5.09569	0	0.207858	0.169497	0	-0.0727162	-0.25774	Synpcc7942_0829	Dawn	0	2.58575	0.721483	0	-2.03195	-1.19105
147	828374	828823	828548	1.12573e-304	3.34015	1.43657	0.894326	0.931186	2.18235	5.16259	0	-1.21729	-1.90104	0	1.22874	2.47095	Synpcc7942_0834	Dusk	0	-2.35296	-4.97855	0	3.32087	7.76755
148	829327	829733	829500	0	3.95272	0.495239	0.502064	1.7227	9.6618	9.82909	0	-2.99665	-2.9769	0	2.48762	2.51238		0	0	0	0	0	0	0
149	830712	831169	830877	0	6.80442	1.02754	1.29183	5.16881	10.6709	10.5503	0	-2.72728	-2.39706	0	1.04578	1.02938		0	0	0	0	0	0	0
150	839514	840210	839762	0	3.56684	3.95946	3.64357	5.63894	6.38553	6.0283	0	0.150658	0.0307058	0	0.179383	0.0963273		0	0	0	0	0	0	0
151	842269	842582	842400	2.38428e-240	6.05143	4.33706	3.48545	1.91081	3.45894	6.116	0	-0.48056	-0.795933	0	0.856146	1.67841	Synpcc7942_0847	0	0	0.222097	-0.233293	0	0.140232	-0.458937
152	846457	846890	846489	5.71209e-239	5.33828	1.82246	2.36588	4.37596	6.13037	7.00985	0	-1.55049	-1.174	0	0.486374	0.679784	Synpcc7942_0850	Dawn	0	0.273662	0.453656	0	-0.242079	-1.13042
153	847094	847383	847225	1.14851e-198	3.89191	4.78317	5.89771	4.87717	3.12918	2.43552	0	0.297488	0.599675	0	-0.640258	-1.00182		0	0	0	0	0	0	0
154	848719	848986	848866	2.71899e-51	2.50765	3.63358	3.22446	3.13983	1.91631	1.67364	0	0.535056	0.36272	0	-0.712353	-0.907697	Synpcc7942_0853	Dawn	0	0.737741	1.09711	0	-1.07842	-1.93261
155	853334	853969	853632	1.62543e-216	1.56373	0.730383	1.08736	2.26524	5.65798	1.82134	0	-1.09826	-0.52416	0	1.32062	-0.314658		0	0	0	0	0	0	0
156	863509	864358	864167	0	7.64698	2.93619	2.27302	1.50444	3.92798	6.67846	0	-1.38094	-1.75028	0	1.38456	2.15029		0	0	0	0	0	0	0
157	865195	865743	865469	6.92384e-183	3.43651	4.29872	4.80836	3.32857	2.21341	2.76036	0	0.322963	0.484602	0	-0.588635	-0.270048	Synpcc7942_0861	Dawn	0	0.390912	0.276591	0	-0.255065	-0.0839103
157	865195	865743	865469	6.92384e-183	3.43651	4.29872	4.80836	3.32857	2.21341	2.76036	0	0.322963	0.484602	0	-0.588635	-0.270048	Synpcc7942_0862	Dusk	0	0.0937396	-0.460034	0	-0.0686579	0.425744
158	867194	867964	867392	0	4.44335	6.07639	6.79556	5.97308	4.43371	3.12795	0	0.451566	0.612944	0	-0.429963	-0.933258		0	0	0	0	0	0	0
159	883398	884164	883673	0	4.36396	4.88971	4.82127	5.62019	4.90295	3.78926	0	0.164112	0.143775	0	-0.196968	-0.568701	Synpcc7942_0878	Dusk	0	0.990719	0.123028	0	-0.982122	0.371986
160	887290	887649	887506	2.07928e-48	3.27126	1.81428	2.67539	3.33101	3.67225	1.90139	0	-0.85045	-0.290099	0	0.140706	-0.808907		0	0	0	0	0	0	0
161	893955	894415	894131	0	7.34588	9.00664	7.9885	6.44417	5.76467	5.23825	0	0.294052	0.120988	0	-0.160755	-0.298909	Synpcc7942_0887	0	0	1.08604	1.72785	0	-0.729426	-0.715654
162	896449	896909	896695	5.322e-292	5.82531	5.70311	5.46801	6.43824	5.44306	5.53271	0	-0.0305845	-0.0913167	0	-0.242249	-0.218681	Synpcc7942_0890	0	0	0.248741	0.224856	0	-0.21184	-0.0154316
163	902982	903342	903200	3.1307e-223	0.629896	4.24237	2.5616	0.951842	0.313257	0.330942	0	2.75168	2.02386	0	-1.60338	-1.52414		0	0	0	0	0	0	0
164	908171	908540	908304	1.10532e-274	6.64115	5.15518	5.64944	5.02842	5.64594	5.18234	0	-0.36541	-0.233325	0	0.167108	0.0434991	Synpcc7942_R0041	0	0	-0.612094	0.0707132	0	0.741011	2.25658
165	922582	923578	923153	0	9.87206	11.9442	11.5258	8.25712	7.0694	6.83335	0	0.274891	0.223449	0	-0.224052	-0.273045	Synpcc7942_0916	0	0	-0.0363681	-0.125153	0	0.274838	-0.0464327
165	922582	923578	923153	0	9.87206	11.9442	11.5258	8.25712	7.0694	6.83335	0	0.274891	0.223449	0	-0.224052	-0.273045	Synpcc7942_R0042	0	NaN	Inf	Inf	NaN	Inf	Inf
166	936281	936814	936623	1.93601e-227	3.66065	4.04582	4.76676	3.56657	2.55865	1.79691	0	0.144334	0.38091	0	-0.479152	-0.989015	Synpcc7942_0929	0	0	0.124395	0.851596	0	-0.778294	-1.14369
167	937672	938211	937853	1.95769e-131	3.64352	3.50062	4.42903	3.81956	2.81419	1.97771	0	-0.0577216	0.281658	0	-0.440687	-0.949576	Synpcc7942_0930	0	0	0.164227	0.65347	0	-0.0427967	-0.407319
168	949870	950450	950186	0	5.81425	6.30399	6.97019	5.95206	4.48214	3.50988	0	0.116673	0.261605	0	-0.409202	-0.76197	Synpcc7942_0942	0	0	0.962244	-0.33689	0	0.248774	0.0733849
168	949870	950450	950186	0	5.81425	6.30399	6.97019	5.95206	4.48214	3.50988	0	0.116673	0.261605	0	-0.409202	-0.76197	Synpcc7942_0943	0	0	-0.778607	0.162086	0	0.0571566	-0.391875
169	967407	967709	967583	2.83635e-132	4.26736	4.26156	4.04761	5.58892	4.52396	4.31192	0	-0.00196228	-0.0762745	0	-0.304983	-0.374241		0	0	0	0	0	0	0
170	973963	974251	974073	4.17489e-47	3.03254	3.18933	4.04087	3.78172	2.90654	2.06156	0	0.072726	0.414138	0	-0.379739	-0.875305	Synpcc7942_0967	Dawn	0	0.159339	0.666065	0	-0.715606	-1.30205
171	985790	986836	986162	0	5.53271	5.41026	6.60854	6.89584	6.0617	4.29794	0	-0.0322881	0.256346	0	-0.186003	-0.682083	Synpcc7942_0977	0	0	0.0799083	0.100616	0	-0.141483	-0.704835
171	985790	986836	986162	0	5.53271	5.41026	6.60854	6.89584	6.0617	4.29794	0	-0.0322881	0.256346	0	-0.186003	-0.682083	Synpcc7942_0978	0	0	0.212551	0.468554	0	-0.677788	-1.20678
172	989117	989911	989737	0	4.70692	7.83194	5.66302	7.54538	5.95429	5.17431	0	0.734587	0.266789	0	-0.341665	-0.544228	Synpcc7942_R0017	0	0	-0.303062	-0.625192	0	0.97933	1.00036
173	994934	995205	995105	7.37733e-57	1.72072	3.39512	3.79492	2.69087	1.73967	1.6106	0	0.980447	1.14105	0	-0.629262	-0.740477		0	0	0	0	0	0	0
174	997155	998059	997789	3.3408e-182	2.20812	1.40801	1.15759	1.40722	2.50581	3.99628	0	-0.649163	-0.931696	0	0.832424	1.50581	Synpcc7942_0988	0	0	-0.559576	-0.69361	0	0.660857	0.908168
175	1005019	1005820	1005490	0	10.0625	11.1557	12.271	9.55793	6.78855	5.78379	0	0.148786	0.28626	0	-0.493593	-0.724682	Synpcc7942_0997	0	0	0.708946	0.708444	0	-0.205325	-0.375939
175	1005019	1005820	1005490	0	10.0625	11.1557	12.271	9.55793	6.78855	5.78379	0	0.148786	0.28626	0	-0.493593	-0.724682	Synpcc7942_0998	0	0	0.392852	-0.207542	0	0.33545	0.465592
176	1007925	1008429	1008227	7.84563e-81	4.98758	4.01629	4.45885	4.61065	3.7736	2.73569	0	-0.312476	-0.161668	0	-0.289031	-0.753067	Synpcc7942_0999	0	0	0.048429	-0.300473	0	0.97851	0.985569
177	1013635	1014527	1013878	0	10.1064	1.58436	4.74706	9.96058	9.56616	7.10057	0	-2.6733	-1.09016	0	-0.0582889	-0.488296	Synpcc7942_1002	0	0	-3.25727	-1.51602	0	0.544329	-0.0462738
178	1039585	1040290	1039858	0	4.73618	9.88553	7.92166	6.22435	3.96947	4.03557	0	1.0616	0.74208	0	-0.648975	-0.625152		0	0	0	0	0	0	0
179	1050473	1050852	1050719	6.59247e-51	2.81164	2.72117	2.60345	4.50104	3.33892	2.99418	0	-0.0471888	-0.110992	0	-0.430874	-0.588097	Synpcc7942_1036	0	0	-1.08563	-0.528134	0	0.950672	0.953802
180	1055417	1055730	1055587	4.21078e-149	3.95251	0.851556	0.82041	1.59609	3.82992	4.88195	0	-2.21459	-2.26835	0	1.26277	1.61292	Synpcc7942_1042	Dusk	0	-2.92935	-2.30368	0	0.3085	-0.107992
181	1059862	1060416	1060102	0	6.82023	1.42431	3.50155	6.95619	6.34509	3.54859	0	-2.25956	-0.961828	0	-0.132658	-0.971053	Synpcc7942_1047	0	0	-3.52226	-2.85594	0	1.46989	-1.47725
182	1063501	1064155	1063878	0	7.45139	1.65869	3.10723	5.38888	6.11814	7.67777	0	-2.16746	-1.26188	0	0.183107	0.510701	Synpcc7942_1052	0	0	-2.30374	-2.07828	0	0.859655	-0.446524
183	1079270	1079609	1079410	5.43616e-183	4.56634	5.64536	7.05325	6.32658	3.92078	2.26263	0	0.30603	0.627251	0	-0.690285	-1.48342	Synpcc7942_1068	Dawn	0	0.613964	1.39283	0	-1.17941	-1.42961
184	1101894	1102920	1102055	5.41034e-260	5.02305	3.84776	6.09063	4.93722	3.82256	2.45981	0	-0.384544	0.278028	0	-0.36916	-1.00515	Synpcc7942_1086	Dawn	0	0.0151154	0.649193	0	-0.478656	-0.794284
185	1103970	1104351	1104200	3.70557e-130	3.90953	4.9808	5.71143	5.15105	3.51734	3.17235	0	0.349383	0.546858	0	-0.550384	-0.699317	Synpcc7942_1088	0	0	-0.177848	0.177861	0	0.334177	-0.759697
186	1108317	1108622	1108516	1.46997e-186	4.11984	2.50061	2.79877	3.94108	4.63652	5.9755	0	-0.720305	-0.557795	0	0.234452	0.600471	Synpcc7942_1090	0	0	1.92096	1.01218	0	-1.00266	-1.81912
187	1109469	1110304	1109637	0	7.55108	0.173762	0.298944	4.89585	10.6083	7.94679	0	-5.4415	-4.65874	0	1.11556	0.698813		0	0	0	0	0	0	0
188	1114684	1115009	1114873	3.44753e-97	2.67133	2.53195	2.4815	2.10071	2.3235	3.67907	0	-0.0773079	-0.106347	0	0.145423	0.808465	Synpcc7942_1096	Dusk	0	0.00926361	-0.0298744	0	0.0397835	0.578896
189	1123436	1123696	1123572	4.23652e-57	2.87749	3.58097	3.73956	3.83418	2.46812	2.39315	0	0.315543	0.378058	0	-0.635506	-0.680009		0	0	0	0	0	0	0
190	1132715	1133020	1132917	2.98744e-97	3.63938	3.33681	4.32891	3.88329	2.78357	2.49771	0	-0.125221	0.250311	0	-0.480347	-0.636677	Synpcc7942_1115	Dusk	0	-0.795316	-0.319951	0	-0.090829	0.628974
190	1132715	1133020	1132917	2.98744e-97	3.63938	3.33681	4.32891	3.88329	2.78357	2.49771	0	-0.125221	0.250311	0	-0.480347	-0.636677	Synpcc7942_1116	0	0	0.343909	0.944824	0	-1.63297	-1.73672
191	1137334	1137763	1137570	1.53070728511000e-312	5.51073	7.52914	7.04738	6.47366	4.55431	3.91181	0	0.450241	0.354842	0	-0.507348	-0.726743		0	0	0	0	0	0	0
192	1140491	1142091	1140764	0	10.5134	11.703	10.3089	9.05998	6.85556	6.58375	0	0.154652	-0.0283323	0	-0.402233	-0.460599	Synpcc7942_1122	0	0	1.10933	2.15964	0	-0.762447	-0.612214
193	1141766	1142192	1141908	6.75409e-173	2.32106	1.79728	1.86933	1.24278	2.43067	6.45824	0	-0.368966	-0.312261	0	0.967784	2.37757		0	0	0	0	0	0	0
194	1143239	1143528	1143362	5.3584e-100	4.03504	2.36965	2.70987	3.20856	4.86351	3.92248	0	-0.76791	-0.574361	0	0.600072	0.289838	Synpcc7942_1125	Dusk	0	-1.09128	-0.794328	0	0.712439	0.210086
195	1144805	1145165	1144980	4.06598e-103	4.05482	3.53551	3.87066	3.54118	3.75077	3.00039	0	-0.197721	-0.0670589	0	0.0829569	-0.239082	Synpcc7942_1127	0	0	0.181321	-0.167662	0	-0.182853	0.272017
196	1151187	1151671	1151356	3.0582e-239	4.48811	5.59553	5.95872	5.58218	4.5533	3.1911	0	0.318166	0.408894	0	-0.293917	-0.806774	Synpcc7942_1131	0	0	-0.00457709	-0.217468	0	0.0704327	-1.52656
197	1161397	1161685	1161570	1.58161e-89	3.01966	3.02683	3.67816	2.99524	2.82425	2.2106	0	0.00342241	0.284597	0	-0.0848012	-0.43823	Synpcc7942_1137	0	0	0.130899	0.373513	0	-0.25908	-0.889056
198	1164181	1164565	1164288	7.07062e-105	3.75279	3.31089	3.25371	3.32152	2.85529	3.25531	0	-0.180744	-0.20588	0	-0.218208	-0.0290506		0	0	0	0	0	0	0
199	1170497	1171016	1170764	0	10.2121	12.9494	11.4219	7.03698	6.3633	6.6042	0	0.342609	0.16153	0	-0.145182	-0.0915728	Synpcc7942_R0044	0	0	0.305913	0.595215	0	0.749556	0.695231
200	1172455	1173151	1172712	9.34411258659530e-311	2.03787	0.638437	0.673259	1.05177	2.74685	4.80861	0	-1.67445	-1.59783	0	1.38495	2.1928	Synpcc7942_1148	0	0	-1.99263	-2.06959	0	2.65918	3.67458
201	1174791	1175214	1174978	0	4.78689	6.76465	5.95981	6.40551	4.88756	3.71341	0	0.498927	0.316179	0	-0.390199	-0.786568		0	0	0	0	0	0	0
202	1178193	1179066	1178868	0	5.35653	4.93165	4.29953	4.7613	4.46184	3.64751	0	-0.11923	-0.317122	0	-0.0937169	-0.384442	Synpcc7942_1152	0	0	0.315483	0.149394	0	-0.536207	-0.550663
203	1183151	1183704	1183338	0	5.79585	3.86516	3.84981	3.19921	4.62886	6.10716	0	-0.584495	-0.590233	0	0.53294	0.932785	Synpcc7942_1156	Dusk	0	-0.373269	-0.800878	0	0.668026	1.68078
204	1192325	1192715	1192521	6.00031223989360e-311	3.70709	0.907842	0.947006	1.9359	5.63089	5.27607	0	-2.02977	-1.96884	0	1.54036	1.44646		0	0	0	0	0	0	0
205	1196705	1197868	1196892	0	5.33101	2.35616	1.92172	2.66302	4.16053	6.7742	0	-1.17797	-1.47201	0	0.643705	1.34699		0	0	0	0	0	0	0
206	1209634	1210318	1210110	0	2.72918	1.79963	1.89501	2.26296	3.87977	7.52989	0	-0.600767	-0.526258	0	0.777761	1.73442	Synpcc7942_1176	Dawn	0	-0.0571711	0.0485179	0	0.57037	-1.01508
207	1211485	1212087	1211644	8.18612e-128	3.36298	3.78845	3.34478	4.184	3.20787	3.32404	0	0.171864	-0.00782891	0	-0.383269	-0.331946	Synpcc7942_1179	0	0	0.597125	0.670322	0	-0.392863	-0.00266836
207	1211485	1212087	1211644	8.18612e-128	3.36298	3.78845	3.34478	4.184	3.20787	3.32404	0	0.171864	-0.00782891	0	-0.383269	-0.331946	Synpcc7942_1180	0	0	0.892855	0.626048	0	-0.428318	-0.528427
208	1224093	1224484	1224234	2.60879e-156	4.50681	2.27575	2.86969	2.52332	3.34436	4.40802	0	-0.985765	-0.651213	0	0.406409	0.804807	Synpcc7942_1196	0	0	-0.558277	-0.135229	0	1.09184	1.20083
209	1241276	1243017	1241565	0	7.45533	9.64742	9.20913	7.63226	5.43993	3.89869	0	0.371871	0.304793	0	-0.488523	-0.969119	Synpcc7942_1218	0	0	0.418609	0.744516	0	-0.0688941	-0.811899
209	1241276	1243017	1241565	0	7.45533	9.64742	9.20913	7.63226	5.43993	3.89869	0	0.371871	0.304793	0	-0.488523	-0.969119	Synpcc7942_1219	0	0	0.745134	1.2221	0	-0.616596	-0.761414
210	1246448	1247464	1246956	1.02717e-224	3.92824	1.65046	2.06874	3.63455	5.92379	4.52267	0	-1.25101	-0.925129	0	0.704746	0.315399	Synpcc7942_1225	0	0	-2.06311	-1.76649	0	1.07797	0.240869
211	1248267	1248795	1248562	0	8.47513	10.8112	9.91575	8.09254	6.35581	6.28364	0	0.351219	0.226487	0	-0.348515	-0.36499		0	0	0	0	0	0	0
212	1253199	1253721	1253476	5.44907e-278	2.6745	3.32174	4.39594	2.55121	1.77642	1.49594	0	0.312669	0.716902	0	-0.522205	-0.770125		0	0	0	0	0	0	0
213	1274201	1274599	1274425	0	7.96806	0.46503	1.7395	5.3728	6.23887	5.81101	0	-4.09883	-2.19556	0	0.215612	0.113115	Synpcc7942_1250	0	0	-4.12344	-1.49259	0	-0.00745443	-0.195163
214	1277244	1277665	1277412	1.13954e-288	4.10634	2.29904	2.80356	5.6187	6.90413	4.11119	0	-0.836821	-0.550594	0	0.297222	-0.450681	Synpcc7942_1254	Dawn	0	-0.764274	-0.41273	0	0.449492	-0.241025
215	1277874	1278414	1278245	7.94519e-149	2.353	0.885641	0.971064	1.70621	3.2941	5.46351	0	-1.40971	-1.27686	0	0.949087	1.67903		0	0	0	0	0	0	0
216	1286593	1286899	1286754	1.32819e-128	4.09576	5.65131	5.77766	4.77775	2.9793	3.1015	0	0.464454	0.496353	0	-0.681359	-0.623368		0	0	0	0	0	0	0
217	1287752	1288023	1287878	2.6412e-153	3.54185	3.40678	2.49545	3.74612	4.53108	6.15218	0	-0.0560943	-0.505202	0	0.274455	0.715698		0	0	0	0	0	0	0
218	1301150	1302247	1301793	0	8.68657	9.29568	8.71819	7.66727	6.99939	6.91535	0	0.0977747	0.00524163	0	-0.131482	-0.148911	Synpcc7942_1278	0	0	1.23523	1.59682	0	-0.660408	-1.02926
219	1340405	1340837	1340619	0	6.03545	7.02625	8.98731	7.01155	5.1233	4.02099	0	0.219294	0.574428	0	-0.45266	-0.802182	Synpcc7942_1313	0	0	0.751073	1.38875	0	-0.771348	-0.484797
220	1351359	1351956	1351546	0	8.2211	1.79385	3.5044	6.51586	7.0192	5.51732	0	-2.19627	-1.23017	0	0.107351	-0.239988	Synpcc7942_1322	0	0	-4.01766	-1.54819	0	0.69637	0.512094
221	1360635	1360928	1360766	4.99654e-106	2.43623	1.50233	1.29027	2.09167	2.24664	4.5219	0	-0.697448	-0.916979	0	0.103117	1.11227	Synpcc7942_1327	Dusk	0	-0.795795	-1.07335	0	0.130816	1.07169
222	1374106	1374787	1374468	2.82113e-188	1.82227	1.41248	1.23854	1.64604	2.90952	4.49463	0	-0.367507	-0.557096	0	0.821782	1.4492	Synpcc7942_1340	0	0	0.0126148	-0.308103	0	0.417915	0.77616
223	1377012	1377412	1377142	3.03259e-63	2.6272	4.17581	3.98731	3.93405	2.35408	2.26063	0	0.66853	0.601889	0	-0.740852	-0.799294	Synpcc7942_1343	Dawn	0	0.223787	0.298793	0	-0.898583	-1.60089
224	1383008	1383291	1383178	6.69665e-71	3.05423	0.813605	1.47422	2.32349	4.39442	3.16309	0	-1.90841	-1.05086	0	0.91938	0.445042	Synpcc7942_1352	Dusk	0	-1.54029	-0.507371	0	0.687661	-0.0116175
225	1385242	1385609	1385445	4.43514e-96	2.08253	4.674	3.73007	2.2614	1.25017	1.18617	0	1.16632	0.840865	0	-0.855094	-0.93091		0	0	0	0	0	0	0
226	1397752	1398397	1398237	0	3.99472	4.54652	4.41007	2.82678	2.67526	2.57301	0	0.186669	0.142707	0	-0.0794797	-0.135702	Synpcc7942_1358	Dusk	0	0.468851	0.204241	0	0.533155	1.18091
227	1413941	1414293	1414089	6.81395e-131	1.76371	0.82179	0.951328	2.08553	3.95723	2.95403	0	-1.10177	-0.890598	0	0.924078	0.502273	Synpcc7942_1373	0	0	-0.854759	-0.0126515	0	1.10512	0.183312
228	1417230	1417852	1417561	6.62671e-241	3.29099	2.98816	2.97659	4.91196	4.66871	4.73852	0	-0.139267	-0.144864	0	-0.0732757	-0.051863	Synpcc7942_1376	Dusk	0	-0.758797	-0.00102828	0	0.331695	0.0609498
228	1417230	1417852	1417561	6.62671e-241	3.29099	2.98816	2.97659	4.91196	4.66871	4.73852	0	-0.139267	-0.144864	0	-0.0732757	-0.051863	Synpcc7942_1377	0	0	-0.386849	-0.560831	0	0.785487	0.947132
229	1421061	1421654	1421353	0	8.18549	8.26851	8.90905	7.61307	5.98316	5.34558	0	0.0145588	0.122203	0	-0.34757	-0.51013	Synpcc7942_1379	0	0	0.786401	1.03845	0	-0.545605	-0.258871
230	1435512	1435825	1435580	3.58157e-200	0.544278	7.03294	3.28918	1.0377	0.452145	0.247185	0	3.69171	2.59531	0	-1.19854	-2.06973		0	0	0	0	0	0	0
231	1445827	1446690	1446128	0	6.75734	1.01417	1.08381	3.47621	6.28886	8.13995	0	-2.73615	-2.64034	0	0.855283	1.2275	Synpcc7942_1396	Dusk	0	-1.55131	-2.51549	0	0.625534	1.4547
231	1445827	1446690	1446128	0	6.75734	1.01417	1.08381	3.47621	6.28886	8.13995	0	-2.73615	-2.64034	0	0.855283	1.2275	Synpcc7942_1397	Dusk	0	-3.46512	-2.80296	0	1.73784	1.10354
232	1474877	1475452	1475141	0	4.06489	3.59292	4.22184	4.78622	3.7142	2.78732	0	-0.178058	0.0546573	0	-0.365833	-0.780006	Synpcc7942_1421	0	0	0.956568	0.17368	0	-0.75609	-1.74965
233	1475451	1476401	1475653	1.18372e-293	3.71102	3.67059	3.95748	4.50735	3.23868	2.4994	0	-0.0158044	0.0927667	0	-0.476875	-0.850697	Synpcc7942_1422	Dawn	0	1.33652	0.444552	0	-1.26804	-2.37439
234	1479129	1479921	1479372	7.54168e-164	3.27577	3.95143	4.11491	4.08677	3.05911	2.02046	0	0.270539	0.329024	0	-0.417847	-1.01627	Synpcc7942_1426	Dawn	0	0.842603	0.424302	0	-0.960301	-2.15693
235	1482439	1482951	1482606	7.01267e-287	4.86619	4.59357	4.57259	3.08262	3.98703	3.95775	0	-0.0831744	-0.0897802	0	0.371158	0.360525		0	0	0	0	0	0	0
236	1483956	1484831	1484447	0	3.09218	1.39488	1.17096	2.03799	3.79419	9.47885	0	-1.14848	-1.40093	0	0.896647	2.21757	Synpcc7942_1430	0	0	-1.32743	-1.45683	0	1.40319	2.55552
236	1483956	1484831	1484447	0	3.09218	1.39488	1.17096	2.03799	3.79419	9.47885	0	-1.14848	-1.40093	0	0.896647	2.21757	Synpcc7942_1431	Dawn	0	-0.0230612	-0.0156425	0	0.260834	0.704646
237	1491785	1492709	1492325	8.63035971875700e-312	2.76588	6.05052	5.02836	4.91548	2.75988	2.32709	0	1.12932	0.862348	0	-0.832725	-1.0788	Synpcc7942_1438	0	0	-0.172668	-1.17362	0	0.419083	0.594128
238	1493385	1494228	1493936	0	1.31902	7.65495	4.05082	4.32239	2.62922	2.08756	0	2.53693	1.61875	0	-0.717192	-1.05001		0	0	0	0	0	0	0
239	1496663	1497356	1496929	0	8.32302	12.4264	11.0551	7.32501	5.56465	6.43302	0	0.57823	0.409538	0	-0.396539	-0.187335	Synpcc7942_1443	Dawn	0	0.454416	0.903168	0	-0.159373	-0.94229
240	1506190	1506565	1506386	5.08527e-74	3.43478	1.5596	2.7618	4.29694	1.85869	2.16899	0	-1.13904	-0.314604	0	-1.20902	-0.986287	Synpcc7942_1453	0	0	-1.54022	-0.0609193	0	-1.0288	-1.49831
241	1512230	1512546	1512493	6.57544e-273	3.10878	1.4052	1.32757	2.95346	3.73912	4.3775	0	-1.14557	-1.22756	0	0.340293	0.567698	Synpcc7942_1459	0	0	-0.670895	-0.902936	0	0.846689	0.918533
242	1517009	1519137	1517228	0	6.45133	5.09735	6.13193	5.25268	5.82024	5.65746	0	-0.339848	-0.0732557	0	0.148027	0.107101	Synpcc7942_1464	Dawn	0	0.135426	0.333697	0	-0.563869	-1.95318
243	1519345	1520110	1519668	1.09693e-158	2.35845	2.01442	1.96009	2.11765	2.73585	3.77178	0	-0.227472	-0.266917	0	0.369526	0.832781	Synpcc7942_1466	Dusk	0	-0.411039	-0.61368	0	0.204302	0.68313
244	1530611	1531190	1530829	0	2.84147	8.51521	7.38435	3.66898	1.75578	1.15992	0	1.5834	1.37783	0	-1.06327	-1.66136	Synpcc7942_1479	0	0	0.483704	0.156371	0	0.564017	-0.224829
245	1536771	1537231	1536947	0	7.43338	7.42738	8.04651	5.4926	3.78208	3.32243	0	-0.00116648	0.114344	0	-0.538309	-0.725249	Synpcc7942_1486	Dawn	0	-0.251472	0.20943	0	1.91225	1.26024
245	1536771	1537231	1536947	0	7.43338	7.42738	8.04651	5.4926	3.78208	3.32243	0	-0.00116648	0.114344	0	-0.538309	-0.725249	Synpcc7942_1487	0	0	1.12256	1.80345	0	-1.20742	-0.969715
246	1548809	1549193	1548981	3.73519e-103	3.32047	3.05261	3.9556	3.4556	3.04554	2.83426	0	-0.121346	0.252507	0	-0.182237	-0.285967	Synpcc7942_1499	Dusk	0	0.0179775	0.104194	0	0.222676	-0.938301
247	1551564	1551893	1551720	1.35787e-147	4.05327	5.14162	4.69004	6.05065	4.44575	4.10245	0	0.343136	0.210513	0	-0.444664	-0.560605		0	0	0	0	0	0	0
248	1556287	1557020	1556742	0	1.77073	0.823077	0.819009	2.64711	5.22566	4.59446	0	-1.10524	-1.11239	0	0.981193	0.795473	Synpcc7942_1506	Dusk	0	-2.07723	-2.14995	0	2.855	2.60092
249	1557029	1557560	1557281	0	7.06994	10.5457	10.2285	5.26743	3.98714	4.13867	0	0.576888	0.532819	0	-0.401745	-0.347933		0	0	0	0	0	0	0
250	1558458	1558822	1558613	1.22308e-191	2.72989	1.60992	1.27223	2.63347	4.62419	5.51007	0	-0.76185	-1.10149	0	0.812237	1.06511		0	0	0	0	0	0	0
251	1559144	1559523	1559311	7.16012e-291	4.54803	6.13003	5.9077	4.90837	4.25845	5.08742	0	0.430654	0.377357	0	-0.204915	0.0516912	Synpcc7942_1508	Dusk	0	0.532819	0.921147	0	-0.338556	-0.811465
251	1559144	1559523	1559311	7.16012e-291	4.54803	6.13003	5.9077	4.90837	4.25845	5.08742	0	0.430654	0.377357	0	-0.204915	0.0516912	Synpcc7942_1509	Dawn	0	0.287775	-0.0160723	0	0.0129563	0.802007
252	1560766	1561339	1561123	1.27255e-214	2.42065	0.716775	0.814383	2.24822	6.04816	3.33314	0	-1.7558	-1.57161	0	1.42771	0.568097		0	0	0	0	0	0	0
253	1572154	1573213	1572479	0	9.20356	11.1292	8.99386	9.5623	6.94707	7.12353	0	0.274087	-0.0332527	0	-0.460954	-0.424765	Synpcc7942_1519	0	0	0.156425	0.0553987	0	-0.244929	0.115153
253	1572154	1573213	1572479	0	9.20356	11.1292	8.99386	9.5623	6.94707	7.12353	0	0.274087	-0.0332527	0	-0.460954	-0.424765	Synpcc7942_1521	0	0	0.975054	1.29998	0	-1.53596	-0.942533
254	1573502	1574731	1573693	0	7.35639	9.21162	8.12481	5.6298	4.4574	5.8025	0	0.324457	0.143335	0	-0.336879	0.0435916	Synpcc7942_1522	0	0	0.733427	0.69502	0	-1.25257	-0.586331
255	1583186	1583609	1583379	2.30383e-218	3.68125	6.47676	5.64719	4.69117	3.38795	3.59671	0	0.815076	0.617338	0	-0.469535	-0.383271	Synpcc7942_1525	Dawn	0	0.937364	0.255928	0	-1.20873	-1.2268
256	1610223	1610585	1610407	0	6.77052	7.78182	7.57642	7.04414	4.64404	4.30219	0	0.200841	0.16225	0	-0.601044	-0.711354	Synpcc7942_1552	0	0	1.06119	1.67861	0	-1.4784	-1.53113
257	1611734	1612051	1611894	2.4965e-107	4.2009	3.66411	3.52314	3.90163	3.49673	3.76088	0	-0.197238	-0.253836	0	-0.15807	-0.0530048	Synpcc7942_1554	0	0	0.530893	0.15004	0	-0.39753	-0.428554
258	1612689	1613535	1612868	0	4.47716	4.10213	4.41215	3.73989	4.2064	4.99496	0	-0.12621	-0.0211014	0	0.16959	0.417479	Synpcc7942_1556	Dusk	0	-0.787032	-0.961981	0	1.17033	2.15068
259	1613102	1613583	1613288	0	4.08509	1.92302	2.47487	4.12795	6.97948	4.01232	0	-1.08699	-0.723011	0	0.757695	-0.0409883		0	0	0	0	0	0	0
260	1613963	1614734	1614506	0	5.3965	2.48088	2.30254	3.39071	8.06142	6.80504	0	-1.12117	-1.2288	0	1.24945	1.00502	Synpcc7942_1557	Dusk	0	-0.904593	-0.421132	0	1.10302	-0.604833
261	1619632	1620224	1620001	0	8.58843	9.12861	6.98561	6.78161	5.6821	6.46999	0	0.0880006	-0.29801	0	-0.255202	-0.0678633	Synpcc7942_1562	0	0	0.947039	0.0452434	0	-0.314653	-0.332237
262	1622480	1623071	1622848	0	7.44265	8.42554	9.3912	7.10075	6.06331	4.53218	0	0.178953	0.335493	0	-0.227865	-0.647766		0	0	0	0	0	0	0
263	1630935	1631594	1631127	6.75815e-242	1.58885	0.665269	0.489945	0.747227	2.88428	5.01639	0	-1.25598	-1.69729	0	1.94859	2.74703	Synpcc7942_1572	Dusk	0	-1.61315	-1.98175	0	2.68781	4.04005
264	1652236	1652947	1652666	1.58205e-263	1.99711	0.607975	0.594581	1.36179	3.60443	3.48565	0	-1.71583	-1.74797	0	1.40427	1.35593		0	0	0	0	0	0	0
265	1653041	1653317	1653083	1.49772e-227	3.31631	0.808431	1.02508	2.6266	5.24752	4.66039	0	-2.03638	-1.69384	0	0.998441	0.827255		0	0	0	0	0	0	0
266	1659822	1660199	1659957	9.89249e-132	4.00735	5.8016	4.83437	3.96608	3.72572	3.73103	0	0.5338	0.270677	0	-0.0901928	-0.0881393	Synpcc7942_1593	0	0	0.369677	0.192477	0	-0.446686	-0.275245
267	1662626	1663133	1662860	0	2.36944	6.93962	5.6785	2.74874	1.98724	1.65909	0	1.55031	1.26096	0	-0.468006	-0.728383	Synpcc7942_1596	0	0	1.40976	1.21038	0	-1.09368	-1.4525
268	1681641	1682071	1681761	8.7511e-217	2.96487	0.772152	0.987786	1.25897	4.28564	7.04748	0	-1.94101	-1.5857	0	1.76726	2.48486	Synpcc7942_1613	0	0	0.331389	0.866214	0	-0.418105	-0.6621
269	1682446	1682766	1682613	2.40665e-219	3.53805	4.00777	3.43932	3.83792	2.47045	2.58614	0	0.179846	-0.0408313	0	-0.635552	-0.569523	Synpcc7942_1614	0	0	0.563923	0.684687	0	-0.665806	-0.612068
270	1683486	1684087	1683718	1.48746e-152	4.37413	5.88221	5.10253	5.18509	3.51591	3.43544	0	0.427363	0.222216	0	-0.560469	-0.593876	Synpcc7942_1617	Dawn	0	0.671213	0.755211	0	-0.859929	-1.18471
271	1688994	1689294	1689155	3.35446e-84	4.19787	2.6861	3.02852	1.98225	2.90383	3.95739	0	-0.644146	-0.471044	0	0.550818	0.997409	Synpcc7942_1621	Dusk	0	-0.0602115	0.118635	0	-0.252677	-0.815411
272	1701029	1701747	1701392	1.45543e-273	4.86986	2.9032	2.63347	4.90311	7.80649	4.88601	0	-0.746238	-0.886916	0	0.670976	-0.00504233	Synpcc7942_1633	Dusk	0	-0.670528	-0.489504	0	1.57259	1.0264
273	1701827	1704060	1702574	0	3.55254	2.8205	2.5626	3.34012	3.50722	3.06722	0	-0.332904	-0.471246	0	0.0704295	-0.122966	Synpcc7942_1634	0	0	0.131108	-0.338991	0	-0.336508	-1.07874
274	1704080	1704738	1704522	0	6.31734	7.06605	4.98727	6.7293	5.38332	5.07247	0	0.161587	-0.341066	0	-0.32196	-0.407769	Synpcc7942_1635	Dusk	0	-0.0687882	0.0258241	0	-0.35018	-1.2014
275	1705002	1705478	1705360	0	4.5075	3.41391	2.52261	5.89637	6.7501	5.63144	0	-0.400902	-0.837413	0	0.195083	-0.0663229	Synpcc7942_1636	Dusk	0	-2.19068	-2.45309	0	1.14502	2.05469
276	1713810	1714466	1714332	0	3.17949	1.15026	1.45913	3.26063	5.46765	4.95048	0	-1.46684	-1.12369	0	0.74577	0.602416	Synpcc7942_1646	Dusk	0	-2.28818	-1.72718	0	2.18218	2.07103
277	1729212	1729634	1729505	1.14676e-75	4.02358	2.65999	3.54504	2.43162	3.33695	4.27559	0	-0.597059	-0.182677	0	0.456614	0.814206		0	0	0	0	0	0	0
278	1744048	1744345	1744155	1.46788e-87	3.46167	4.2826	4.32048	4.20675	3.33345	2.52717	0	0.307018	0.319722	0	-0.335688	-0.735181	Synpcc7942_1673	0	0	0.88815	0.21822	0	0.429126	0.537247
279	1772701	1773224	1772886	0	6.27976	3.83453	5.65366	6.31265	6.04346	3.75947	0	-0.711661	-0.151525	0	-0.0628696	-0.747717	Synpcc7942_1705	0	0	-0.81119	-0.0575218	0	0.387304	0.604786
280	1779839	1780217	1780001	1.43941e-206	6.02027	5.3753	4.81976	6.02961	4.5331	5.2391	0	-0.163483	-0.320866	0	-0.411566	-0.202745	Synpcc7942_1710	0	0	0.210179	0.0161144	0	-0.30389	-0.245149
281	1787472	1787927	1787654	3.71876e-163	2.43118	1.55471	1.55882	2.35635	3.46659	3.6203	0	-0.645008	-0.641202	0	0.556963	0.619556		0	0	0	0	0	0	0
282	1792275	1792753	1792455	7.95966e-290	5.69007	8.09457	6.6565	3.00533	3.58609	5.01779	0	0.508507	0.226316	0	0.254888	0.739529		0	0	0	0	0	0	0
283	1792659	1793331	1793113	0	3.51854	0.288812	0.394798	2.78826	10.7638	11.2123	0	-3.60678	-3.15579	0	1.94874	2.00765		0	0	0	0	0	0	0
284	1804115	1804532	1804370	4.79686e-242	2.79214	5.74334	2.9226	4.16719	2.45107	2.10851	0	1.04052	0.0658803	0	-0.765665	-0.982848	Synpcc7942_1734	0	0	1.36639	0.0849368	0	-1.38319	-1.04705
285	1812465	1813553	1812750	0	6.37432	8.04819	7.70095	6.04284	5.54019	4.92849	0	0.336394	0.272767	0	-0.125291	-0.29408	Synpcc7942_1741	Dusk	0	-0.0419619	0.095188	0	-0.46643	-0.652238
285	1812465	1813553	1812750	0	6.37432	8.04819	7.70095	6.04284	5.54019	4.92849	0	0.336394	0.272767	0	-0.125291	-0.29408	Synpcc7942_1742	0	0	0.959684	0.92743	0	-1.86657	-2.41636
286	1813992	1814261	1814082	3.28651e-101	4.53735	2.85914	3.15575	3.44677	4.56059	4.64669	0	-0.666271	-0.523866	0	0.403974	0.430957		0	0	0	0	0	0	0
287	1817462	1817965	1817659	0	5.9931	2.38226	2.47363	3.67766	6.33805	9.9968	0	-1.33097	-1.27667	0	0.78525	1.44268	Synpcc7942_1746	Dawn	0	-0.385772	-1.51449	0	0.662661	1.27823
288	1820653	1821000	1820793	6.67529e-95	3.79939	2.86516	2.4602	3.07762	3.55112	2.94746	0	-0.40715	-0.626993	0	0.206458	-0.0623426	Synpcc7942_1750	0	0	0.446839	-0.198329	0	0.589452	-0.13149
289	1824453	1825096	1824732	0	6.01623	1.45596	1.62844	3.45725	8.69094	7.91122	0	-2.04689	-1.88537	0	1.32989	1.19428		0	0	0	0	0	0	0
290	1826332	1826586	1826431	6.97486e-31	2.91027	3.24739	3.5479	2.98142	1.67085	2.03487	0	0.158126	0.285812	0	-0.835417	-0.551064	Synpcc7942_1759	0	0	0.0604862	-0.355771	0	-0.393459	0.383049
291	1838570	1839773	1838741	0	5.97868	6.67683	5.82621	4.71527	3.42964	3.12624	0	0.159337	-0.0372693	0	-0.459283	-0.592911	Synpcc7942_1772	0	0	0.906874	1.31229	0	-0.626702	-0.475106
292	1838937	1839676	1839341	2.04067e-143	4.94353	5.72317	6.01994	5.89268	3.48202	2.61049	0	0.211272	0.284207	0	-0.758999	-1.1746	Synpcc7942_1774	0	0	0.387732	0.708186	0	-0.249135	-0.653143
293	1852252	1853455	1852532	0	5.23055	0.692513	0.653108	1.92429	7.47117	11.358	0	-2.91705	-3.00157	0	1.95701	2.56131	Synpcc7942_1784	Dusk	0	-5.46798	-4.33335	0	3.22948	3.94014
294	1863164	1863485	1863299	1.67602e-188	3.77909	2.04624	3.17913	5.84009	6.51976	3.07317	0	-0.885062	-0.249406	0	0.158826	-0.926266		0	0	0	0	0	0	0
295	1864253	1864506	1864357	4.3658e-138	4.01272	2.88218	2.64193	4.08683	4.9073	4.64546	0	-0.477417	-0.602985	0	0.263948	0.18484	Synpcc7942_1793	0	0	-0.0168013	0.587317	0	-1.59822	-1.64568
296	1873526	1873995	1873825	2.90837e-184	3.12763	4.19024	3.39247	3.64673	2.54059	2.611	0	0.421964	0.117265	0	-0.521435	-0.481997	Synpcc7942_1803	0	0	-0.101353	-0.483764	0	0.840186	0.697206
297	1874225	1874563	1874471	4.42531e-148	7.49381	3.53597	3.97892	4.86163	4.33664	4.37099	0	-1.08359	-0.913322	0	-0.164863	-0.153479	Synpcc7942_1804	Dusk	0	-0.331542	-0.174519	0	0.415013	0.138542
298	1876916	1877194	1877046	4.09372e-114	3.25354	2.75237	2.57419	3.26127	3.71805	3.96824	0	-0.241335	-0.337891	0	0.189111	0.283065		0	0	0	0	0	0	0
299	1893617	1894008	1893843	2.04688e-165	2.35425	3.90539	2.76329	3.01477	2.79948	2.65438	0	0.730198	0.231119	0	-0.106891	-0.183675	Synpcc7942_1820	0	0	0.389699	-0.738741	0	0.662225	0.4301
299	1893617	1894008	1893843	2.04688e-165	2.35425	3.90539	2.76329	3.01477	2.79948	2.65438	0	0.730198	0.231119	0	-0.106891	-0.183675	Synpcc7942_1821	0	0	0.765766	0.271365	0	0.339648	-0.409498
300	1898920	1899394	1899035	0	7.19058	6.16322	6.11297	5.96874	5.14551	4.43938	0	-0.222424	-0.234234	0	-0.214114	-0.427068		0	0	0	0	0	0	0
301	1899396	1899997	1899574	0	6.15729	4.17241	3.75632	4.92411	7.46725	6.67676	0	-0.561415	-0.712977	0	0.600715	0.439284	Synpcc7942_1830	Dusk	0	-1.01668	-1.02626	0	1.02559	0.600026
302	1900809	1901235	1901042	2.28721e-247	4.64219	6.10931	6.78678	6.18029	4.65482	3.95923	0	0.396204	0.547921	0	-0.408949	-0.642457		0	0	0	0	0	0	0
303	1901494	1902073	1901741	0	6.91449	4.86025	7.3052	5.00054	5.11638	3.84672	0	-0.508592	0.0792994	0	0.0330403	-0.378453	Synpcc7942_1832	Dawn	0	1.04706	1.07217	0	-1.13713	-1.53233
304	1905730	1906178	1905961	0	3.22801	0.463847	0.528955	1.51007	6.86117	12.7	0	-2.79892	-2.60943	0	2.18384	3.07214		0	0	0	0	0	0	0
305	1915722	1916306	1916092	0	4.78304	4.72276	5.47046	4.43218	3.71532	3.58575	0	-0.018298	0.193734	0	-0.254528	-0.305743	Synpcc7942_1848	0	0	0.47957	0.0513691	0	-0.473826	0.222136
306	1916324	1917887	1916607	0	4.08499	0.560789	0.644878	1.0389	4.32485	7.45914	0	-2.8648	-2.66323	0	2.05759	2.84395	Synpcc7942_1849	Dusk	0	-4.5666	-4.20942	0	2.90001	4.11008
307	1919019	1919550	1919162	7.40164e-171	3.73493	2.47603	3.27649	4.8022	3.58616	1.85002	0	-0.593054	-0.188932	0	-0.421254	-1.37616		0	0	0	0	0	0	0
308	1926642	1927331	1926789	0	5.85385	1.28997	2.40674	5.65138	6.86076	4.03338	0	-2.18205	-1.28231	0	0.279766	-0.486613	Synpcc7942_1858	0	0	-2.7685	-1.07231	0	0.445897	-0.998119
309	1935398	1935654	1935511	8.37191e-111	2.36848	1.43968	1.29245	1.71717	2.65703	4.35831	0	-0.71822	-0.87385	0	0.62978	1.34373		0	0	0	0	0	0	0
310	1955083	1955430	1955283	6.30108e-204	3.48988	2.12895	3.1567	3.96131	5.29337	3.17739	0	-0.713034	-0.144762	0	0.418207	-0.318136		0	0	0	0	0	0	0
311	1956112	1956355	1956210	2.87056e-69	2.3193	2.57942	2.73481	4.05143	3.521	3.13561	0	0.153355	0.237748	0	-0.202444	-0.369684	Synpcc7942_1883	0	0	0.788444	0.464208	0	-0.208678	-0.639984
312	1964191	1965211	1964410	3.97248e-251	3.45641	3.78817	4.12675	4.35457	3.26237	2.71171	0	0.132225	0.25573	0	-0.416613	-0.68333		0	0	0	0	0	0	0
313	1967596	1967976	1967726	9.31784e-152	4.09224	3.01028	2.52746	3.77392	5.44981	4.12753	0	-0.44299	-0.695204	0	0.530141	0.129215	Synpcc7942_1895	Dusk	0	-0.119202	-0.0293916	0	0.371554	-0.101997
314	1984360	1984688	1984582	5.04898e-101	4.50512	1.63211	2.12153	4.38993	3.66204	3.51868	0	-1.46482	-1.08646	0	-0.261547	-0.319162	Synpcc7942_1907	Dusk	0	-1.62862	-0.649442	0	0.217707	-0.351222
315	1988619	1989050	1988876	1.02222e-206	4.38665	4.76707	4.82877	4.56776	4.80838	3.8254	0	0.119984	0.138538	0	0.0740651	-0.255878	Synpcc7942_1911	0	0	0.796728	0.207757	0	-0.473711	0.062477
316	1989575	1990143	1989762	0	5.13148	0.668047	1.59072	4.24586	6.92805	4.71911	0	-2.94135	-1.68969	0	0.706393	0.152458	Synpcc7942_1913	Dusk	0	-1.01916	-0.788808	0	0.676083	0.0260402
317	1990825	1991314	1991110	7.41524e-113	2.415	1.73123	1.63414	2.10016	2.90699	3.79407	0	-0.480228	-0.563492	0	0.469029	0.85325		0	0	0	0	0	0	0
318	1991274	1991581	1991418	5.61318e-94	2.58734	3.64161	3.80578	3.49476	2.27127	2.0829	0	0.493108	0.556725	0	-0.621691	-0.746602	Synpcc7942_1915	0	0	0.472031	0.33415	0	0.0976961	-0.440974
319	1998056	1998369	1998187	0	5.44426	6.32601	7.46494	6.87584	5.08896	3.53336	0	0.216559	0.455395	0	-0.434163	-0.960495		0	0	0	0	0	0	0
320	1998908	1999341	1999167	7.11458e-143	3.53103	2.58778	2.24125	3.29955	4.63582	4.5212	0	-0.448375	-0.655785	0	0.490556	0.454439	Synpcc7942_1922	0	0	-0.714427	-0.878897	0	0.986861	1.25411
321	2018221	2018501	2018279	3.82873e-108	3.26414	3.7747	4.35185	4.99968	3.05905	2.29814	0	0.209658	0.414924	0	-0.708751	-1.12137	Synpcc7942_1944	Dawn	0	0.246137	0.332906	0	-0.286492	-0.519703
322	2023892	2024233	2024027	6.0485e-120	3.40943	1.54106	1.64233	1.68119	3.12094	4.99623	0	-1.14561	-1.05379	0	0.892496	1.57135	Synpcc7942_1950	Dusk	0	-0.945756	-1.45697	0	0.872178	1.08962
323	2024755	2025527	2025196	2.30505e-266	4.52153	5.7999	5.16764	5.7694	4.48757	3.7329	0	0.359218	0.192696	0	-0.362487	-0.628125		0	0	0	0	0	0	0
324	2027723	2028017	2027850	0	5.3325	7.24814	8.90139	7.02522	3.68221	2.51664	0	0.4428	0.73922	0	-0.931973	-1.48105	Synpcc7942_1956	0	0	-0.0406685	0.00772786	0	-0.00401698	0.0586937
325	2032488	2032875	2032747	1.41708e-182	4.11371	3.74872	5.25744	2.82174	4.48837	4.40076	0	-0.134043	0.353919	0	0.669609	0.641169		0	0	0	0	0	0	0
326	2045129	2045489	2045329	2.01517e-154	2.6662	1.56397	1.62935	2.02598	3.99156	4.11149	0	-0.769568	-0.710488	0	0.97833	1.02104		0	0	0	0	0	0	0
327	2045490	2046159	2045694	5.22131e-196	3.46844	1.27897	1.58748	2.27447	3.92873	4.18179	0	-1.43931	-1.12755	0	0.788533	0.878593		0	0	0	0	0	0	0
328	2047139	2047561	2047391	0	3.91771	2.09226	1.60919	2.80057	5.66016	5.82719	0	-0.904945	-1.28368	0	1.01512	1.05708	Synpcc7942_1976	Dusk	0	-1.29382	-1.45857	0	1.84318	1.60508
329	2049787	2049998	2049615	8.61944e-114	3.78314	3.89031	4.09109	5.41715	3.60488	3.25078	0	0.0402993	0.112899	0	-0.587583	-0.73675	Synpcc7942_1977	0	0	0.139276	0.405494	0	-0.666604	-0.858652
330	2052638	2053372	2053003	1.9856e-282	2.00496	8.12961	5.93426	2.42173	0.803338	1.02083	0	2.01962	1.5655	0	-1.59196	-1.2463	Synpcc7942_1982	0	0	-0.254078	-0.16459	0	0.123129	-0.50458
330	2052638	2053372	2053003	1.9856e-282	2.00496	8.12961	5.93426	2.42173	0.803338	1.02083	0	2.01962	1.5655	0	-1.59196	-1.2463	Synpcc7942_1983	0	0	2.18618	1.21781	0	-1.21025	-1.74526
331	2054196	2055013	2054415	0	4.51701	4.86426	5.9619	6.63883	4.77067	2.64433	0	0.106854	0.400406	0	-0.476736	-1.32803	Synpcc7942_1984	0	0	0.533048	0.251557	0	0.317453	0.176099
332	2057398	2058276	2057786	0	8.40288	0.808016	0.859429	3.86474	10.537	11.109	0	-3.37843	-3.28943	0	1.44702	1.52328	Synpcc7942_1986	0	0	-1.17206	-1.04309	0	1.05526	1.3277
332	2057398	2058276	2057786	0	8.40288	0.808016	0.859429	3.86474	10.537	11.109	0	-3.37843	-3.28943	0	1.44702	1.52328	Synpcc7942_1987	Dusk	0	-4.40625	-3.88356	0	2.5245	2.14041
333	2059729	2060034	2059890	5.04956e-123	2.40661	3.2997	3.94913	2.1494	1.80709	1.10723	0	0.455334	0.714534	0	-0.250268	-0.956976		0	0	0	0	0	0	0
334	2067361	2068125	2067828	0	7.728	6.90616	6.87893	7.80996	6.36766	4.78637	0	-0.162212	-0.167911	0	-0.294551	-0.706384	Synpcc7942_1999	0	0	0.145988	0.390514	0	-0.558718	-0.965831
335	2079821	2080279	2080112	0	6.90527	3.63773	5.13142	8.43416	7.6076	4.25877	0	-0.924658	-0.428338	0	-0.148803	-0.985807		0	0	0	0	0	0	0
336	2084562	2085130	2084775	2.47648e-225	3.12778	3.39763	3.49096	4.4727	3.48171	2.85622	0	0.119392	0.158484	0	-0.361352	-0.64704	Synpcc7942_2015	0	0	0.0104612	0.0942184	0	0.0506923	-0.117557
336	2084562	2085130	2084775	2.47648e-225	3.12778	3.39763	3.49096	4.4727	3.48171	2.85622	0	0.119392	0.158484	0	-0.361352	-0.64704	Synpcc7942_2017	0	0	0.0713915	-0.190153	0	0.0827573	0.108954
337	2085312	2085782	2085502	0	6.79524	8.55648	9.47003	6.63379	4.68075	3.40954	0	0.332492	0.478844	0	-0.503094	-0.960257		0	0	0	0	0	0	0
338	2089804	2090232	2090018	2.97782e-214	3.06201	3.27765	3.50081	3.886	4.41523	5.04269	0	0.0981805	0.193209	0	0.184201	0.375907	Synpcc7942_2020	0	0	-0.0909042	-0.074686	0	0.312961	0.563061
339	2092086	2092497	2092339	0	5.01457	6.52261	5.31913	6.96592	5.44574	5.21813	0	0.379325	0.0850635	0	-0.355185	-0.416779	Synpcc7942_2023	0	0	1.47669	1.4607	0	-0.830768	-0.776558
340	2094306	2094712	2094523	7.52717e-227	2.92149	4.13519	5.57286	5.51099	2.37303	2.43516	0	0.501247	0.931711	0	-1.21558	-1.17829	Synpcc7942_2026	Dawn	0	0.391055	1.23036	0	-0.0156189	-0.257554
341	2099910	2100483	2100344	0	7.81879	0.965329	2.75359	5.85359	6.34443	4.23963	0	-3.01785	-1.50563	0	0.116168	-0.465385	Synpcc7942_2030	0	0	-2.9216	-1.20687	0	0.347255	-0.691291
342	2123550	2126572	2126177	0	6.93187	0.516004	2.05224	5.92547	9.28647	6.68152	0	-3.74779	-1.75604	0	0.648201	0.173247	Synpcc7942_2049	0	0	-2.52063	-1.58107	0	-0.448191	-0.895199
342	2123550	2126572	2126177	0	6.93187	0.516004	2.05224	5.92547	9.28647	6.68152	0	-3.74779	-1.75604	0	0.648201	0.173247	Synpcc7942_2050	Dawn	0	-0.39088	-0.116759	0	-0.496659	0.479463
343	2134519	2135199	2134693	0	5.75936	2.64161	2.99603	3.16156	5.39152	5.86029	0	-1.12449	-0.942858	0	0.770054	0.890335	Synpcc7942_2057	Dawn	0	-0.362906	0.259684	0	-0.351579	-1.00386
344	2137131	2137524	2137328	3.53349e-308	6.5879	6.12594	5.43428	5.44127	5.05112	4.61104	0	-0.104887	-0.277731	0	-0.107341	-0.238852	Synpcc7942_2059	Dusk	0	0.0161863	0.124239	0	-0.21632	-0.565699
345	2138219	2138705	2138550	1.97782e-120	3.07865	3.23393	4.18408	3.2406	2.41528	1.88472	0	0.0709873	0.44261	0	-0.424072	-0.781908	Synpcc7942_2061	Dawn	0	0.397718	0.148957	0	0.248454	-0.830966
346	2140642	2140953	2140846	1.87667e-96	2.64237	2.70718	3.59648	4.40733	3.48374	2.93623	0	0.0349601	0.444753	0	-0.339268	-0.585941	Synpcc7942_2064	0	0	0.169941	0.606489	0	-0.381111	-0.667532
347	2149486	2149941	2149755	0	5.24923	2.99042	3.18896	4.26036	5.03827	6.42541	0	-0.811758	-0.719018	0	0.241954	0.592816	Synpcc7942_2071	0	0	-0.681215	-0.720091	0	0.259295	0.464796
347	2149486	2149941	2149755	0	5.24923	2.99042	3.18896	4.26036	5.03827	6.42541	0	-0.811758	-0.719018	0	0.241954	0.592816	Synpcc7942_2072	0	0	-0.573685	-0.442663	0	-0.202097	-0.0477991
348	2150133	2150908	2150403	1.70923e-272	3.86044	2.46232	2.25534	3.17637	4.26342	5.02256	0	-0.648745	-0.775422	0	0.424635	0.661047		0	0	0	0	0	0	0
349	2161337	2161623	2161438	6.69866e-90	2.30472	1.58707	2.26678	2.53001	2.95167	3.91419	0	-0.538228	-0.0239504	0	0.222386	0.629571		0	0	0	0	0	0	0
350	2166541	2166816	2166674	1.0483e-109	2.44115	3.8244	4.69488	3.79624	1.73985	1.31426	0	0.647671	0.943527	0	-1.12561	-1.53031		0	0	0	0	0	0	0
351	2166841	2167219	2166960	9.83868e-246	3.49764	4.60549	6.1031	5.07446	2.87857	1.99255	0	0.396972	0.803159	0	-0.817901	-1.34864	Synpcc7942_2086	Dawn	0	0.518443	0.945209	0	-1.27161	-2.3166
352	2167789	2168506	2168050	0	0.871609	6.14053	2.53946	1.05979	0.641391	0.77902	0	2.81661	1.54277	0	-0.724502	-0.444047		0	0	0	0	0	0	0
353	2169379	2169949	2169619	2.29995e-98	2.62332	1.00253	1.16161	2.14474	4.10316	3.90544	0	-1.38775	-1.17527	0	0.935933	0.864686	Synpcc7942_2090	0	0	0.645145	0.447201	0	-0.251242	-0.416076
354	2193550	2194283	2193738	0	5.16181	8.24102	9.04876	7.64151	4.9535	3.92076	0	0.674946	0.809842	0	-0.625409	-0.962724		0	0	0	0	0	0	0
355	2195814	2196394	2196108	0	6.12194	8.68529	7.70651	4.86359	4.2359	3.79004	0	0.504586	0.33209	0	-0.199354	-0.359807		0	0	0	0	0	0	0
356	2199801	2200174	2200011	1.4087e-195	4.58066	2.29972	1.98605	2.74698	3.82924	3.84317	0	-0.994098	-1.20565	0	0.479209	0.484448	Synpcc7942_2118	0	0	0.28828	-0.132669	0	-0.0417157	-0.474656
357	2201775	2202813	2202311	0	8.64103	9.6319	7.48525	6.26812	5.95523	5.66732	0	0.156616	-0.207154	0	-0.0738754	-0.145367	Synpcc7942_2120	0	0	0.703086	0.0351155	0	-0.0816078	0.517411
358	2203539	2203876	2203727	1.03724e-267	4.59244	6.17328	6.41725	6.43294	4.38269	3.16752	0	0.426778	0.482695	0	-0.55366	-1.02212		0	0	0	0	0	0	0
359	2206886	2207357	2207105	2.17136e-107	2.86016	4.20236	2.32647	2.15605	2.61564	2.60631	0	0.555102	-0.297957	0	0.278778	0.273621	Synpcc7942_2126	0	0	0.885406	1.4915	0	0.712814	1.02323
359	2206886	2207357	2207105	2.17136e-107	2.86016	4.20236	2.32647	2.15605	2.61564	2.60631	0	0.555102	-0.297957	0	0.278778	0.273621	Synpcc7942_2127	Dusk	0	3.66994	0.981346	0	-1.29974	-0.0472002
360	2207358	2207735	2207476	1.26377e-196	6.0027	3.76149	3.96577	4.79232	4.70019	4.346	0	-0.674308	-0.598012	0	-0.028003	-0.141035		0	0	0	0	0	0	0
361	2216293	2216688	2216538	3.30076e-118	3.96972	1.61034	2.93382	4.38756	4.76364	4.68398	0	-1.30167	-0.436255	0	0.118644	0.0943146	Synpcc7942_2137	Dusk	0	-1.55859	0.143163	0	-0.308569	-0.555618
362	2228104	2228364	2228245	1.10047e-70	1.64586	4.08601	2.70971	4.22565	1.75189	1.2881	0	1.31185	0.7193	0	-1.27026	-1.71393		0	0	0	0	0	0	0
363	2263302	2263596	2263438	3.00254e-197	3.30709	1.17114	1.16353	2.63083	4.61082	5.65929	0	-1.49765	-1.50706	0	0.809505	1.1051		0	0	0	0	0	0	0
364	2263818	2264152	2263946	5.15542e-227	4.89644	4.64739	4.95546	5.0966	3.97752	4.42407	0	-0.0753126	0.0172873	0	-0.357664	-0.204158		0	0	0	0	0	0	0
365	2280947	2281479	2281335	0	9.05619	7.43107	7.38242	7.76722	7.01821	6.02412	0	-0.285334	-0.294811	0	-0.146295	-0.366649	Synpcc7942_R0008	0	0	-1.17779	0.407597	0	0.621712	2.01627
366	2282544	2282960	2282652	8.06799e-180	3.94438	2.2867	1.96817	3.42626	3.6781	4.78271	0	-0.786529	-1.00294	0	0.102327	0.481195		0	0	0	0	0	0	0
367	2288377	2289167	2288918	0	11.3366	10.5976	8.64581	7.35469	6.42514	6.53928	0	-0.0972454	-0.390913	0	-0.194936	-0.169531	Synpcc7942_2212	0	0	0.593129	0.91105	0	-0.450149	-0.871081
368	2292576	2292895	2292798	2.96659e-129	1.11327	4.43682	4.19279	2.10177	0.562268	0.384641	0	1.99472	1.91311	0	-1.90228	-2.45002	Synpcc7942_2217	0	0	0.75826	1.65394	0	-1.62679	-1.4793
369	2293720	2293928	2293699	1.53832e-111	0.827707	4.84315	3.83479	1.38353	0.542787	0.303871	0	2.54875	2.21196	0	-1.34989	-2.18682	Synpcc7942_2220	0	0	0.902403	1.42803	0	-1.88634	-1.16194
370	2294923	2295269	2294919	0	1.01098	4.7378	2.89111	1.44106	0.578014	0.405892	0	2.22846	1.51587	0	-1.31796	-1.82797	Synpcc7942_2224	0	0	1.2913	1.33221	0	-2.61177	-2.11974
371	2295321	2295681	2295488	1.31036e-121	0.808651	3.70688	2.55423	1.10039	0.309687	0.300746	0	2.19662	1.6593	0	-1.82913	-1.8714	Synpcc7942_2225	0	0	1.47531	1.53514	0	-2.90748	-1.18035
372	2298800	2300279	2299757	0	6.72846	9.42105	8.06678	6.16064	4.96166	5.20141	0	0.485613	0.261717	0	-0.312257	-0.244176	Synpcc7942_2232	Dawn	0	2.00673	1.72338	0	-2.90058	-1.40364
372	2298800	2300279	2299757	0	6.72846	9.42105	8.06678	6.16064	4.96166	5.20141	0	0.485613	0.261717	0	-0.312257	-0.244176	Synpcc7942_2234	0	0	0.159703	0.321185	0	-0.213827	-1.38795
373	2305763	2306016	2305880	7.78225e-35	3.13248	2.74725	2.37829	3.95283	3.34805	2.95615	0	-0.189318	-0.397383	0	-0.239567	-0.419168	Synpcc7942_2240	Dawn	0	-0.00741007	-0.193006	0	0.0896073	0.186947
374	2309357	2310155	2309741	0	7.86119	9.39078	8.58061	7.60246	6.09151	6.75586	0	0.256497	0.126331	0	-0.319667	-0.170327	Synpcc7942_2243	Dusk	0	-0.707877	-0.697619	0	0.733343	0.530944
375	2310156	2310915	2310575	0	6.36992	3.32311	5.0564	6.18552	6.15605	3.72632	0	-0.93874	-0.333165	0	-0.00688935	-0.731146	Synpcc7942_2245	0	0	-1.22442	-0.505825	0	0.496489	-0.531769
376	2315028	2315461	2315175	1.09908e-165	1.83164	0.518563	0.380376	0.589658	1.58728	6.8504	0	-1.82054	-2.26764	0	1.42861	3.53824		0	0	0	0	0	0	0
377	2318147	2318638	2318286	0	4.99107	7.65361	7.74091	7.56952	4.45775	3.05913	0	0.616791	0.633154	0	-0.763886	-1.30708		0	0	0	0	0	0	0
378	2324835	2325944	2325168	0	8.03906	3.58891	3.19029	4.09869	5.70515	8.66802	0	-1.16348	-1.33334	0	0.477102	1.08054	Synpcc7942_2254	Dusk	0	-1.65664	-2.96641	0	2.41908	5.78835
378	2324835	2325944	2325168	0	8.03906	3.58891	3.19029	4.09869	5.70515	8.66802	0	-1.16348	-1.33334	0	0.477102	1.08054	Synpcc7942_2255	0	0	-0.929978	-1.0594	0	0.305633	0.326179
379	2326531	2327095	2326898	3.94976e-296	6.32831	4.74893	5.35382	6.16953	5.44025	5.26556	0	-0.414218	-0.24125	0	-0.181488	-0.228574	Synpcc7942_2257	0	0	0.226443	0.324626	0	-0.148221	-0.0292166
379	2326531	2327095	2326898	3.94976e-296	6.32831	4.74893	5.35382	6.16953	5.44025	5.26556	0	-0.414218	-0.24125	0	-0.181488	-0.228574	Synpcc7942_2258	0	0	0.183776	-0.0411586	0	-0.574397	-0.131025
380	2329113	2329586	2329367	2.58341e-217	3.96592	4.72917	5.49012	5.12702	4.02022	3.35578	0	0.253934	0.469182	0	-0.350848	-0.611474	Synpcc7942_2260	0	0	0.98265	1.02681	0	-1.77698	-0.332817
381	2332471	2333130	2332950	1.00311e-188	3.10701	3.85605	3.72217	5.07182	5.03113	4.49558	0	0.311593	0.260615	0	-0.0116222	-0.173996	Synpcc7942_2264	0	0	0.588522	0.137101	0	0.0698557	0.144976
382	2335680	2335978	2335817	9.35672e-101	3.65274	3.1338	3.07177	2.32801	3.12051	3.39792	0	-0.221065	-0.249909	0	0.422685	0.545557	Synpcc7942_2267	Dusk	0	-0.249769	0.016037	0	0.207032	0.60104
383	2343428	2343745	2343591	2.3685e-100	3.37424	3.40049	3.29146	4.65948	3.61312	2.78774	0	0.0111806	-0.0358333	0	-0.366926	-0.741076	Synpcc7942_R0011	0	0	-0.458338	-0.167109	0	2.09151	3.69152
384	2368505	2368851	2368723	1.11346e-171	2.55385	1.19419	0.980954	1.76835	4.59668	5.27749	0	-1.09664	-1.38042	0	1.37819	1.57745		0	0	0	0	0	0	0
385	2369428	2369881	2369651	0	8.07593	9.08077	9.99022	6.45665	5.04602	4.66153	0	0.169186	0.306888	0	-0.355639	-0.469982	Synpcc7942_2300	0	0	0.875828	1.2611	0	-1.139	-0.153942
386	2372218	2372649	2372338	3.46952e-154	4.01998	4.43405	4.70059	6.00099	4.66466	2.86317	0	0.141438	0.225655	0	-0.363429	-1.06759		0	0	0	0	0	0	0
387	2373995	2374536	2374121	4.02676e-207	4.16065	2.47202	1.93632	2.45981	4.54996	4.99366	0	-0.751118	-1.10349	0	0.887307	1.02155		0	0	0	0	0	0	0
388	2379195	2379771	2379546	0	9.05497	10.4668	9.25455	8.01372	6.49267	7.05755	0	0.209039	0.0314536	0	-0.303661	-0.183306		0	0	0	0	0	0	0
389	2383114	2384093	2383842	0	4.66975	7.85402	9.82888	6.60013	3.26666	1.97365	0	0.750086	1.07368	0	-1.01468	-1.74163	Synpcc7942_2314	0	0	1.64678	0.437388	0	-0.86353	-3.52443
389	2383114	2384093	2383842	0	4.66975	7.85402	9.82888	6.60013	3.26666	1.97365	0	0.750086	1.07368	0	-1.01468	-1.74163	Synpcc7942_2315	Dawn	0	0.458419	1.06145	0	-1.12918	-2.06823
390	2385191	2385786	2385432	9.13332e-193	2.40188	3.16897	3.94513	3.09341	1.79823	1.21908	0	0.399849	0.715908	0	-0.782623	-1.34341		0	0	0	0	0	0	0
391	2390002	2390275	2390130	1.18172e-92	2.74145	0.968316	1.15906	2.38394	4.43086	3.97292	0	-1.50139	-1.24198	0	0.894237	0.73685	Synpcc7942_2321	0	0	-1.19785	-0.960207	0	1.62414	0.907274
392	2398414	2399969	2398604	0	3.78569	8.45339	7.25772	4.76704	2.08077	2.47667	0	1.15898	0.938961	0	-1.19598	-0.944689		0	0	0	0	0	0	0
393	2403898	2404572	2404403	0	4.25694	2.90025	2.66705	3.14783	4.54011	4.7403	0	-0.553637	-0.674573	0	0.528368	0.59062	Synpcc7942_2336	Dusk	0	-1.47282	-2.10284	0	2.47481	2.38913
394	2407695	2408071	2407862	0	7.68482	7.25468	4.65452	6.13804	6.68547	7.83194	0	-0.0830992	-0.723378	0	0.123251	0.351592		0	0	0	0	0	0	0
395	2410722	2411543	2411197	0	10.1184	0.648785	2.82037	8.06122	8.73006	7.13808	0	-3.9631	-1.84302	0	0.114994	-0.175462	Synpcc7942_2342	Dawn	0	-3.03223	-1.39998	0	0.163281	-0.362658
395	2410722	2411543	2411197	0	10.1184	0.648785	2.82037	8.06122	8.73006	7.13808	0	-3.9631	-1.84302	0	0.114994	-0.175462	Synpcc7942_2344	0	0	-0.746088	-0.256069	0	-0.400775	-0.163825
396	2412677	2413479	2413261	0	8.30984	8.51938	7.24839	8.12359	5.9772	6.69024	0	0.0359285	-0.19716	0	-0.442647	-0.28006	Synpcc7942_2345	0	0	1.17241	1.36514	0	-0.961073	-0.666635
396	2412677	2413479	2413261	0	8.30984	8.51938	7.24839	8.12359	5.9772	6.69024	0	0.0359285	-0.19716	0	-0.442647	-0.28006	Synpcc7942_2346	Dusk	0	0.138944	0.0512131	0	-0.25766	0.723135
397	2419410	2420736	2420381	0	6.47865	1.82507	1.32975	4.56166	14.6263	13.9122	0	-1.82774	-2.28454	0	1.68093	1.60872	Synpcc7942_2352	Dusk	0	-4.76541	-4.09598	0	4.0077	3.00209
397	2419410	2420736	2420381	0	6.47865	1.82507	1.32975	4.56166	14.6263	13.9122	0	-1.82774	-2.28454	0	1.68093	1.60872	Synpcc7942_2353	0	0	-1.07143	-1.43049	0	2.52849	2.29587
398	2421505	2422138	2421788	4.27405e-167	3.41444	4.98681	4.03935	4.44494	3.31054	2.65747	0	0.546467	0.242473	0	-0.425097	-0.742112	Synpcc7942_2354	0	0	0.795998	0.694945	0	-0.122557	-0.569033
399	2432383	2433167	2432963	0	6.29714	3.10816	2.75988	3.75519	4.46144	6.23769	0	-1.01864	-1.19009	0	0.248624	0.732124	Synpcc7942_2366	0	0	-1.28865	-1.29598	0	1.32854	1.7804
400	2433143	2433914	2433471	0	6.88366	9.70643	8.16831	7.68081	6.46873	6.12352	0	0.495765	0.246862	0	-0.247776	-0.326898	Synpcc7942_2367	Dusk	0	-1.96771	-2.1318	0	1.66006	1.17245
400	2433143	2433914	2433471	0	6.88366	9.70643	8.16831	7.68081	6.46873	6.12352	0	0.495765	0.246862	0	-0.247776	-0.326898	Synpcc7942_2368	0	0	-0.76661	-0.532769	0	0.385842	-0.0716372
401	2447678	2448204	2447998	0	5.31627	8.26307	7.74025	8.52128	6.27987	5.28225	0	0.636264	0.541968	0	-0.440335	-0.689917	Synpcc7942_2380	0	0	-0.585074	-0.430572	0	0.936703	1.40139
402	2460238	2460529	2460401	1.05727e-106	1.73883	0.434791	0.393015	0.62203	2.20548	4.15884	0	-1.99972	-2.14546	0	1.82604	2.74113	Synpcc7942_2388	Dusk	0	-2.49459	-2.68725	0	2.65119	2.79667
403	2471148	2471486	2471288	3.92507e-200	4.59142	4.83237	5.82477	3.60652	3.84375	3.71465	0	0.0737914	0.343262	0	0.0919055	0.0426191	Synpcc7942_2395	0	0	-0.392649	-0.709842	0	0.478864	0.683896
404	2478314	2478787	2478561	0	7.39986	9.39955	9.20414	7.6018	5.80213	5.64645	0	0.345094	0.314786	0	-0.389759	-0.428998	Synpcc7942_2406	0	0	0.210137	-0.279959	0	0.421254	1.27259
405	2481395	2481666	2481406	3.38058e-63	1.54614	2.77321	3.99015	1.66569	0.63902	0.765294	0	0.842883	1.36777	0	-1.38219	-1.12203	Synpcc7942_2408	0	0	1.83426	2.9244	0	-0.984916	-2.90231
406	2482450	2483098	2482841	0	7.88093	6.38273	8.52035	8.68134	5.40168	3.674	0	-0.304192	0.112546	0	-0.684509	-1.24056	Synpcc7942_2409	Dawn	0	0.850688	1.81909	0	-0.754394	-1.1807
407	2492056	2492395	2492218	1.42107e-213	4.30627	3.45238	2.96466	3.78875	4.91702	5.26303	0	-0.318847	-0.538571	0	0.376062	0.474172	Synpcc7942_2420	0	0	-0.268549	-0.411567	0	0.6585	0.980906
408	2498551	2499129	2498968	1.29057e-241	4.59797	4.85819	5.53616	4.30924	3.41424	3.78797	0	0.0794218	0.267888	0	-0.335869	-0.18601	Synpcc7942_2426	Dawn	0	0.535113	0.487731	0	0.0348827	-0.934275
409	2507523	2507792	2507689	5.68647e-149	4.08739	4.42229	4.15473	4.55047	4.19202	4.50345	0	0.113614	0.0235737	0	-0.11837	-0.0149842	Synpcc7942_2434	0	0	0.192684	-0.127203	0	0.117366	0.165027
410	2513811	2514795	2513968	0	8.29384	7.13221	7.65471	7.21587	7.20963	6.98439	0	-0.21769	-0.115691	0	-0.00124761	-0.0470395	Synpcc7942_2439	0	0	0.771926	0.721653	0	-0.473218	-1.05344
411	2517505	2517858	2517692	8.0342e-147	3.74794	1.94092	2.04825	3.21967	3.65909	4.35907	0	-0.949361	-0.871709	0	0.184571	0.437107	Synpcc7942_2440	0	0	-0.172972	-0.285928	0	0.126772	0.358
412	2518069	2518383	2518211	0	4.18708	3.12739	3.17789	4.67065	4.9844	6.45109	0	-0.420987	-0.397875	0	0.0937967	0.465919	Synpcc7942_2440	0	0	-0.172972	-0.285928	0	0.126772	0.358
413	2522837	2523309	2522981	1.05483e-148	3.1412	3.08757	2.57787	3.81613	4.03931	4.7605	0	-0.0248442	-0.285137	0	0.0819974	0.319002	Synpcc7942_2445	0	0	0.703379	0.17475	0	-1.09188	-0.888254
414	2531841	2532163	2531974	6.27689e-96	4.46063	2.30468	2.21532	3.52805	3.17969	3.32972	0	-0.952682	-1.00973	0	-0.149981	-0.0834696	Synpcc7942_2453	Dusk	0	0.168198	0.189464	0	-0.186207	-0.602563
415	2538225	2538783	2538383	0	7.47828	8.19416	8.18186	9.72222	7.87041	6.00083	0	0.131889	0.129723	0	-0.304847	-0.696124	Synpcc7942_R0016	0	0	-0.886683	0.155527	0	2.95158	4.25658
416	2545259	2545514	2545381	2.18738e-59	3.47987	3.57333	4.21763	3.62688	2.71453	3.17413	0	0.0382387	0.2774	0	-0.418026	-0.192366	Synpcc7942_2463	Dusk	0	0.262284	0.223529	0	-1.11946	-1.2014
417	2546400	2547193	2547005	1.83242e-232	3.50511	3.43043	3.69006	3.77556	4.04451	4.52802	0	-0.0310705	0.0741845	0	0.0992743	0.26219	Synpcc7942_2465	0	0	-0.19251	-0.275991	0	0.73064	0.775123
418	2548460	2548730	2548588	1.47393e-137	1.40377	5.67521	3.85995	3.42545	1.37365	0.804216	0	2.01537	1.45928	0	-1.31827	-2.09064	Synpcc7942_2468	0	0	1.71741	0.448475	0	-1.11808	-2.50781
419	2552436	2552743	2552583	3.74997e-87	3.62323	4.2362	4.03404	4.44795	3.38866	3.57435	0	0.225495	0.154949	0	-0.392426	-0.315457	Synpcc7942_2471	0	0	0.227106	0.569391	0	-0.873865	-0.656953
420	2554800	2555132	2554956	6.00761e-245	5.64645	4.05284	4.29723	3.64515	5.83257	6.73274	0	-0.47841	-0.393937	0	0.678152	0.885215	Synpcc7942_2473	0	0	-0.467904	-0.197216	0	0.0342599	-0.188763
421	2558084	2558827	2558199	0	5.57587	2.02892	2.36548	3.99749	9.07315	7.54703	0	-1.45848	-1.23706	0	1.18251	0.916815	Synpcc7942_2476	Dusk	0	-1.30928	-0.635472	0	0.794034	0.968405
422	2564389	2565391	2565189	2.13535e-230	5.47473	4.92603	4.1511	3.1206	2.10457	3.53037	0	-0.152365	-0.399295	0	-0.568298	0.177995	Synpcc7942_2483	0	0	-0.384342	-0.824063	0	-0.460192	0.275424
423	2568125	2568468	2568245	9.09944e-116	2.10268	1.82512	2.05483	2.35306	4.12716	3.97001	0	-0.204238	-0.0332064	0	0.810615	0.754606	Synpcc7942_2486	Dusk	0	-0.722277	-0.997159	0	2.24211	1.72365
423	2568125	2568468	2568245	9.09944e-116	2.10268	1.82512	2.05483	2.35306	4.12716	3.97001	0	-0.204238	-0.0332064	0	0.810615	0.754606	Synpcc7942_2487	Dusk	0	-0.586559	-0.293698	0	0.0971547	-0.00489843
424	2570788	2571297	2571012	2.37361e-216	3.61818	4.14769	4.83062	5.6029	4.14283	3.72305	0	0.197042	0.416942	0	-0.435558	-0.589686		0	0	0	0	0	0	0
425	2581418	2581808	2581688	0	3.38223	1.09513	1.13796	2.72533	6.26366	6.54918	0	-1.62687	-1.57152	0	1.20057	1.26488	Synpcc7942_2501	0	0	-0.313738	-0.419339	0	0.434895	0.481488
426	2584080	2584627	2584256	1.2646e-194	1.69131	0.537151	0.876839	1.90224	4.60315	2.43551	0	-1.65474	-0.94776	0	1.27492	0.356528	Synpcc7942_2502	Dawn	0	-1.5551	-1.25386	0	1.71133	0.313703
427	2587623	2587970	2587767	3.78988e-139	2.51695	2.55163	1.96227	3.08446	4.35695	5.07291	0	0.0197391	-0.359151	0	0.498302	0.717797	Synpcc7942_2506	0	0	-0.707001	-0.819463	0	0.661867	1.1426
428	2589788	2590561	2589946	1.04365e-305	5.65357	5.02264	5.30936	5.83985	5.22548	5.04268	0	-0.170716	-0.0906233	0	-0.160369	-0.211742	Synpcc7942_2510	0	0	0.684533	0.761812	0	-0.49575	-0.70776
429	2593080	2593376	2593223	5.45126e-141	3.21098	3.48731	4.74461	4.06003	3.29103	2.44798	0	0.119103	0.563277	0	-0.302953	-0.729901		0	0	0	0	0	0	0
430	2596400	2596868	2596627	0	6.1397	7.04498	7.08494	6.05144	4.68449	4.13368	0	0.198426	0.206587	0	-0.369385	-0.54985		0	0	0	0	0	0	0
431	2604975	2605411	2605162	0	6.49546	5.32154	5.2441	6.15923	6.35595	7.56585	0	-0.287587	-0.308735	0	0.0453587	0.296753	Synpcc7942_2524	0	0	0.856491	1.0065	0	-1.34783	-0.856818
432	2611063	2611707	2611287	0	8.39574	9.13718	8.994	8.58957	8.07514	7.28311	0	0.122091	0.0993059	0	-0.0890988	-0.238031	Synpcc7942_2529	0	0	0.220345	-0.278716	0	1.36886	1.1845
432	2611063	2611707	2611287	0	8.39574	9.13718	8.994	8.58957	8.07514	7.28311	0	0.122091	0.0993059	0	-0.0890988	-0.238031	Synpcc7942_2530	0	0	0.80677	1.64685	0	-0.839848	-1.22891
433	2620832	2621121	2620979	3.45486e-76	2.89247	3.71077	3.57192	4.125	3.65968	3.24344	0	0.359415	0.304397	0	-0.172678	-0.34687	Synpcc7942_2538	0	0	0.0799428	0.0728751	0	0.106831	0.124832
434	2622124	2622662	2622377	0	13.6005	14.7873	12.5126	8.10518	6.8021	7.30385	0	0.120699	-0.120283	0	-0.252864	-0.150188	Synpcc7942_2540	Dusk	0	-1.8773	-0.699167	0	1.59333	3.50413
434	2622124	2622662	2622377	0	13.6005	14.7873	12.5126	8.10518	6.8021	7.30385	0	0.120699	-0.120283	0	-0.252864	-0.150188	Synpcc7942_R0019	0	0	0.952453	0.736166	0	0.945152	1.04766
435	2622657	2623395	2623079	0	9.75745	12.5395	12.1903	8.23654	5.99092	6.11059	0	0.361909	0.321156	0	-0.459263	-0.430729	Synpcc7942_R0020	0	0	-3.29392	0.558814	0	3.43031	4.07155
436	2624792	2625130	2624934	1.09651e-153	4.50957	3.28647	4.35362	5.38715	5.05084	4.33566	0	-0.456453	-0.0507765	0	-0.093001	-0.313272		0	0	0	0	0	0	0
437	2626946	2627219	2626968	5.14678e-267	4.55942	2.4039	2.38451	2.85577	4.5071	5.76384	0	-0.923472	-0.935161	0	0.65832	1.01315	Synpcc7942_2547	0	0	-1.04164	-0.918823	0	0.128245	0.571797
438	2633416	2633831	2633674	0	2.56598	0.574087	0.477413	0.929443	3.87978	8.07317	0	-2.16017	-2.4262	0	2.06154	3.1187	Synpcc7942_2554	Dusk	0	-1.93933	-2.52682	0	1.61458	2.97893
439	2636172	2636487	2636317	2.89633e-118	3.33059	1.43909	1.41007	2.26801	3.37394	5.48162	0	-1.21062	-1.24001	0	0.57301	1.27318		0	0	0	0	0	0	0
440	2638157	2638619	2638416	0	9.42699	8.45375	8.35248	8.91738	6.8026	7.5607	0	-0.157205	-0.174592	0	-0.390535	-0.238101	Synpcc7942_2559	0	0	0.981808	1.07491	0	-0.699879	-0.571243
441	2639827	2640341	2640135	1.7796e-146	3.10408	3.67611	4.65389	3.58649	3.64942	2.39655	0	0.244016	0.584274	0	0.0250929	-0.581616	Synpcc7942_2561	Dawn	0	0.725031	0.82832	0	-0.448613	-0.618612
442	2648635	2649095	2648810	2.01674e-242	3.38729	5.99831	7.11957	6.71526	3.04566	1.50076	0	0.824424	1.07166	0	-1.14069	-2.16175		0	0	0	0	0	0	0
443	2660444	2660737	2660544	0	7.00132	8.91111	8.80425	4.68679	4.18461	4.51918	0	0.347979	0.330574	0	-0.163509	-0.0525411		0	0	0	0	0	0	0
444	2666627	2667182	2666955	0	8.28872	8.30895	9.40745	7.40089	6.04888	5.02183	0	0.00351683	0.182654	0	-0.291031	-0.559486	Synpcc7942_R0023	0	0	-1.34906	-1.30368	0	1.69707	1.15704
445	2672955	2673216	2673072	7.51277e-66	2.10541	3.16603	4.35303	3.94908	2.84583	1.93811	0	0.588572	1.04792	0	-0.472666	-1.02686	Synpcc7942_2589	0	0	0.450452	0.845439	0	-0.213149	-0.372166
446	2673982	2674267	2674092	1.1965e-203	2.14632	1.3637	1.47734	1.66044	2.90004	6.46966	0	-0.654347	-0.538871	0	0.804502	1.96212	Synpcc7942_2591	Dusk	0	-4.40806	-2.59209	0	3.29888	5.16786
447	2678647	2679074	2678771	2.99160000000000e-320	5.52742	5.61638	5.85858	5.76437	4.20315	5.02129	0	0.0230339	0.0839435	0	-0.455691	-0.199105	Synpcc7942_2596	Dawn	0	0.0355675	0.177806	0	-0.0205582	-0.933209
448	2683669	2684390	2684019	0	1.32654	0.415005	0.680221	1.38088	6.39201	3.87178	0	-1.67646	-0.96359	0	2.21068	1.48741	Synpcc7942_2601	0	0	-2.13337	-0.687829	0	2.49375	2.05632
448	2683669	2684390	2684019	0	1.32654	0.415005	0.680221	1.38088	6.39201	3.87178	0	-1.67646	-0.96359	0	2.21068	1.48741	Synpcc7942_2602	Dusk	0	-1.30345	-0.735701	0	2.44624	2.0192
449	2687744	2688239	2688028	3.75155e-192	4.67947	2.44571	2.49293	3.93289	4.83542	4.43154	0	-0.936094	-0.908503	0	0.298053	0.172217	Synpcc7942_2605	0	0	-0.746124	-1.14094	0	1.25022	0.925225
450	2693613	2694021	2693791	1.49958e-133	3.80379	4.07288	4.88671	5.16099	3.84707	2.73835	0	0.0986087	0.361426	0	-0.423887	-0.914341	Synpcc7942_2612	0	0	0.305744	0.669634	0	-0.027193	-0.147708
451	7	285	110	0	2.99824	3.13935	4.34449	3.5767	2.57414	2.18706	0	0.0663491	0.53507	0	-0.474535	-0.709635		0	0	0	0	0	0	0

## Sheet: Legend
Column	Name	Description
A	RNAP peak #	Peak number in list of filtered peaks (see Materials and Methods for details). Some peaks have multiple gene targets and are thus listed multiple times for each separate gene target.
B	Start	First chromosomal location of peak
Column	End	Last chromosomal location of peak
D	Peak max location	Chromosomal location of highest normalized read count detected within peak in replicate experiment
E	Q-value	Minimum Q-value of peak in the respective replicate determined by the PeakSeq algorithm (Rozowsky et al 2009)
F-K	Enrichment over mock at peak max location	ChIP-seq data was normalized to the Mock pulldown using PeakSeq (Rozowsky et al 2009). Then, the ratio of the normalized read counts between the sample and the Mock was calculated at the peak max location
L-Q	Log2 normalized change in enrichment from original condition	The enrichment of the peak at each timepoint was divided by the enrichment at time 0 (8 hours since dawn in Low Light for High Light pulse, 8 hours since dawn in Clear Day for Shade pulse) and the Log2 of this ratio was taken.
R	Gene target of peak	Gene target of the peak (See Materials and Methods for details).
S	High confidence class of gene target	High confidence circadian class of gene target (See Materials and Methods and Figure 2 - source data for details). Options are Dusk, Dawn, or 0 if gene is not circadian.
T-Y	Log2 normalized change in gene target expression from original condition	The expression of the gene target of the peak at each timepoint in the respective replicate was divided by the expression at time 0 (8 hours since dawn in Low Light for High Light pulse, 8 hours since dawn in Clear Day for Shade pulse) and the Log2 of this ratio was taken.
