# Supplementary material for: Natural changes in light interact with circadian regulation at promoters to control gene expression in cyanobacteria
Source: eLife journal article supplement (doi:10.7554/elife.32032), 2017-12-14
Supplement: supp [file elife-32032-supp-v2.zip › elife_poa_e32032_Figure_4_source_data_1.xlsx]

## Sheet: Sheet1
Percent phosphorylated RpaA
	Hours since dawn	2	4	6	8	9	10	11	12
Low Light	Replicate 1	10.3757	28.0086	46.1923	50.8933	57.2562	53.1227	57.0472	56.3346
	Replicate 2	9.81966	28.4475	44.8495	53.0627	59.5241	54.486	62.5059	57.539
	Average	10.0977	28.2281	45.5209	51.978	58.3902	53.8044	59.7766	56.9368
	Range	0.556008	0.438932	1.34278	2.16945	2.26794	1.36334	5.45869	1.20435
Clear Day	Replicate 1	6.07443	20.4133	41.2887	43.7219	49.7829	50.2479	53.6756	52.5108
	Replicate 2	5.84429	21.1715	38.9129	46.9754	49.9869	53.1847	56.1189	58.6821
	Average	5.95936	20.7924	40.1008	45.3486	49.8849	51.7163	54.8973	55.5965
	Range	0.230141	0.758202	2.37585	3.25345	0.203988	2.93686	2.44335	6.17128
		Minutes in pulse				Minutes since return to original condition
		0	15	30	60	15	30	60
	Hours since dawn	8	8.25	8.5	9	9.25	9.5	10
High Light pulse	Replicate 1	52.2476	49.8441	50.0384	49.1028	55.7766	55.7491	55.8957
	Replicate 2	46.43	45.351	46.8153	45.2524	53.5037	47.7285	56.2194
	Average	49.3388	47.5976	48.4269	47.1776	54.6402	51.7388	56.0575
	Range	5.81755	4.49308	3.22308	3.85045	2.27294	8.0206	0.323767
Shade pulse	Replicate 1	43.2702	38.5657	49.9409	57.4313	49.0526	55.3556	58.6697
	Replicate 2	43.9123	44.5443	52.9868	62.3368	57.0309	58.8948	59.2828
	Average	43.5913	41.555	51.4638	59.884	53.0418	57.1252	58.9763
	Range	0.64209	5.97861	3.04591	4.90546	7.97826	3.53924	0.613014
