# Supplementary material for: Natural changes in light interact with circadian regulation at promoters to control gene expression in cyanobacteria
Source: eLife journal article supplement (doi:10.7554/elife.32032), 2017-12-14
Supplement: supp [file elife-32032-supp-v2.zip › elife_poa_e32032_Figure_4_source_data_2.xlsx]

## Sheet: Replicate 2
					Enrichment over mock at peak max location						Log2 normalized change in enrichment from original condition								Log2 normalized change in gene target expression from original condition
					Minutes in High Light pulse			Minutes in Shade pulse			Minutes in High Light pulse			Minutes in Shade pulse					Minutes in High Light pulse			Minutes in Shade pulse
					0	15	60	0	15	60	0	15	60	0	15	60			0	15	60	0	15	60
					Hours since dawn			Hours since dawn			Hours since dawn			Hours since dawn					Hours since dawn			Hours since dawn
RpaA Peak #	Start	End	Peak max location	Q-value	8	8.25	9	8	8.25	9	8	8.25	9	8	8.25	9	Gene target of peak	High confidence class of gene target	8	8.25	9	8	8.25	9
1	11911	12431	12212	0	8.52084	5.70871	6.05491	6.8944	7.47794	6.7157	0	-0.577832	-0.492892	0	0.117216	-0.0378867	Synpcc7942_0012	0	0	0.442718	1.51682	0	-0.438311	-1.01406
1	11911	12431	12212	0	8.52084	5.70871	6.05491	6.8944	7.47794	6.7157	0	-0.577832	-0.492892	0	0.117216	-0.0378867	Synpcc7942_0013	0	0	2.04506	-0.605727	0	-2.03953	-0.58732
2	32768	34527	33835	0	26.5924	15.2712	16.7308	16.2687	20.9473	25.2201	0	-0.800204	-0.668506	0	0.364659	0.63247	Synpcc7942_0033	Dusk	0	-0.674464	-0.738129	0	0.632143	2.14377
3	52948	54477	53390	0	3.3325	4.26472	3.17284	3.98024	3.40481	3.6083	0	0.355846	-0.0708305	0	-0.225282	-0.141535		0	0	0	0	0	0	0
4	54732	55281	55280	0	7.03468	4.487	4.44748	6.27078	4.82153	4.80145	0	-0.648735	-0.661496	0	-0.379155	-0.385175	Synpcc7942_0052	0	0	-0.400586	-0.393555	0	0.815191	0.414723
5	58137	59366	58320	0	5.78259	4.53876	3.41636	5.88345	6.73421	6.65358	0	-0.349417	-0.759257	0	0.194847	0.177468	Synpcc7942_0055	0	0	-0.6726	-0.868706	0	0.755068	1.72068
6	93197	93782	93496	0	6.11867	6.04463	6.97576	5.11032	5.15862	4.15485	0	-0.0175634	0.189133	0	0.0135691	-0.298619	Synpcc7942_0095	0	0	-0.0216368	-0.101974	0	0.339898	0.106137
7	100994	101323	101102	0	6.54463	6.63859	9.28246	5.20359	7.27686	6.75349	0	0.0205656	0.504196	0	0.483811	0.376128	Synpcc7942_0100	Dusk	0	-3.06446	-3.39703	0	2.02502	3.88725
7	100994	101323	101102	0	6.54463	6.63859	9.28246	5.20359	7.27686	6.75349	0	0.0205656	0.504196	0	0.483811	0.376128	Synpcc7942_0101	Dawn	0	0.646442	0.118406	0	-0.266018	-0.0660306
8	129336	129778	129467	0	3.81586	2.26661	6.33231	4.51259	4.59126	2.39845	0	-0.751472	0.730725	0	0.0249341	-0.911853	Synpcc7942_0130	0	0	-1.20401	-1.03565	0	1.25532	0.960792
9	152205	152784	152310	0	2.99858	3.13658	1.75779	3.36413	3.89831	3.30278	0	0.0649123	-0.770518	0	0.212618	-0.0265497		0	0	0	0	0	0	0
10	170496	171097	170788	0	65.4274	33.3811	39.0434	25.8576	42.7897	62.6155	0	-0.970863	-0.744814	0	0.726677	1.27593		0	0	0	0	0	0	0
11	178174	179255	178357	0	11.3249	8.95188	9.04524	13.6096	15.1055	11.9353	0	-0.339237	-0.324269	0	0.150455	-0.189391		0	0	0	0	0	0	0
12	179250	180364	179931	0	3.71943	3.17975	3.17097	4.24121	4.84198	4.5494	0	-0.22617	-0.230156	0	0.191121	0.1012	Synpcc7942_0181	0	0	-0.710129	-0.805943	0	1.78603	1.89212
13	203940	204366	204126	0	3.70745	2.11141	4.81883	4.04085	4.89287	5.46432	0	-0.812223	0.378255	0	0.276023	0.435385	Synpcc7942_0202	0	0	-0.693316	-1.0222	0	0.766661	0.846643
14	242012	242491	242255	0	4.35839	2.36288	2.57866	2.33588	7.39094	16.6778	0	-0.883246	-0.757175	0	1.66179	2.83589	Synpcc7942_0245	Dusk	0	-2.11652	-1.87915	0	2.05864	2.86441
14	242012	242491	242255	0	4.35839	2.36288	2.57866	2.33588	7.39094	16.6778	0	-0.883246	-0.757175	0	1.66179	2.83589	Synpcc7942_0246	0	0	-0.457301	-0.273803	0	-0.290111	-0.301065
15	258312	258635	258449	0	4.73265	3.00903	2.35504	2.95068	1.85505	6.00974	0	-0.653349	-1.0069	0	-0.669592	1.02625	Synpcc7942_0260	0	0	0.116075	-0.0671411	0	0.754579	0.240885
16	263181	264141	263360	0	5.41595	4.15907	3.2577	3.27445	3.51987	4.80907	0	-0.380955	-0.733362	0	0.104272	0.554506	Synpcc7942_0267	Dusk	0	-2.52876	-2.20207	0	3.30106	3.5027
17	288095	288593	288337	0	4.1415	2.83542	6.34552	3.27145	3.25657	2.16358	0	-0.546593	0.615584	0	-0.00657928	-0.596512		0	0	0	0	0	0	0
18	314265	314972	314734	0	12.0422	2.5346	3.61081	3.63171	16.7751	8.54062	0	-2.24827	-1.73771	0	2.2076	1.23369	Synpcc7942_0316	Dusk	0	-1.26878	-1.57096	0	2.2681	1.65992
18	314265	314972	314734	0	12.0422	2.5346	3.61081	3.63171	16.7751	8.54062	0	-2.24827	-1.73771	0	2.2076	1.23369	Synpcc7942_0317	0	0	-0.524825	-0.748441	0	0.90103	0.567445
19	335898	336292	336091	0	7.18566	6.01719	4.79701	8.12487	7.08394	6.79738	0	-0.256032	-0.582986	0	-0.197793	-0.257365		0	0	0	0	0	0	0
20	361938	362218	362046	1.58021e-281	1.32501	0.590784	0.767391	0.772879	1.23813	3.76509	0	-1.1653	-0.787964	0	0.679842	2.28437	Synpcc7942_0369	Dusk	0	-2.07838	-2.08333	0	1.62873	2.01822
21	372095	372650	372309	0	4.07628	5.05075	5.98893	4.56029	3.41779	4.83911	0	0.309245	0.555047	0	-0.416061	0.0856143	Synpcc7942_0377	Dusk	0	-1.73348	-1.76988	0	1.40414	1.51886
21	372095	372650	372309	0	4.07628	5.05075	5.98893	4.56029	3.41779	4.83911	0	0.309245	0.555047	0	-0.416061	0.0856143	Synpcc7942_0378	Dusk	0	-0.562694	-0.884742	0	0.196247	0.881921
22	388087	388592	388251	0	7.82437	2.42545	2.79442	5.38617	9.12063	8.10606	0	-1.68972	-1.48543	0	0.759875	0.589742	Synpcc7942_0395	0	0	0.656535	0.733156	0	0.320641	-0.0806031
23	413547	414059	413697	0	4.12358	2.26669	2.00827	1.94459	4.37531	3.48524	0	-0.863312	-1.03795	0	1.16992	0.841793	Synpcc7942_0423	Dusk	0	-1.42062	-1.34165	0	1.64887	2.06014
23	413547	414059	413697	0	4.12358	2.26669	2.00827	1.94459	4.37531	3.48524	0	-0.863312	-1.03795	0	1.16992	0.841793	Synpcc7942_0424	0	0	-2.1258	-1.06271	0	0.685437	0.127232
24	423319	423797	423483	0	2.48678	1.12213	1.43624	2.50868	1.85281	6.70824	0	-1.14804	-0.791984	0	-0.437215	1.41901	Synpcc7942_0433	0	0	-3.87533	-2.52171	0	2.10692	1.72053
25	445027	445834	445484	0	45.7066	49.1523	58.3496	51.9048	48.9723	41.6905	0	0.104854	0.352319	0	-0.0839035	-0.316149		0	0	0	0	0	0	0
26	456581	456928	456744	0	5.87518	6.57858	6.64039	6.74683	4.32208	4.4541	0	0.163143	0.176636	0	-0.642486	-0.599078	Synpcc7942_0469	Dawn	0	-0.179918	0.190608	0	0.187831	-0.315693
26	456581	456928	456744	0	5.87518	6.57858	6.64039	6.74683	4.32208	4.4541	0	0.163143	0.176636	0	-0.642486	-0.599078	Synpcc7942_0470	0	0	-1.63215	-1.90607	0	0.650248	0.652962
27	469163	469540	469328	0	4.16971	3.52966	5.57906	3.0757	2.58858	6.79485	0	-0.240419	0.420074	0	-0.248752	1.14353	Synpcc7942_0483	Dusk	0	-0.393918	-0.496042	0	-0.427123	-0.475733
28	479275	479817	479475	0	6.59151	7.05586	5.22552	10.8455	9.60599	8.01056	0	0.0982126	-0.335034	0	-0.175096	-0.437126	Synpcc7942_0491	Dusk	0	-1.58386	-0.545646	0	1.85618	1.82043
29	539011	539453	539289	0	2.32687	2.51658	1.85805	2.37638	4.0006	3.42093	0	0.113075	-0.324599	0	0.75145	0.525623	Synpcc7942_0556	Dusk	0	-0.812798	-1.23424	0	1.10419	1.31193
29	539011	539453	539289	0	2.32687	2.51658	1.85805	2.37638	4.0006	3.42093	0	0.113075	-0.324599	0	0.75145	0.525623	Synpcc7942_0557	0	0	-0.982906	-1.4991	0	0.966125	1.00175
30	546381	546704	546588	4.69762e-170	2.21195	2.31457	2.25364	3.95343	2.46479	2.15953	0	0.0654247	0.026937	0	-0.681644	-0.872387		0	0	0	0	0	0	0
31	555035	555349	555246	0	3.22592	3.51676	4.11549	4.95555	2.95177	2.14379	0	0.124536	0.351354	0	-0.747462	-1.20888	Synpcc7942_0572	0	0	-1.11774	-1.02301	0	1.03629	2.05216
32	588274	588585	588437	1.3728e-248	4.43663	2.72896	4.68841	0.907385	1.84587	4.84524	0	-0.701109	0.0796371	0	1.02452	2.41678	Synpcc7942_0599	Dusk	0	-1.45177	-1.89234	0	1.82517	3.08051
33	636888	637265	637007	0	6.52672	7.77609	6.45358	9.81745	4.80297	4.63681	0	0.252685	-0.0162585	0	-1.03142	-1.08222	Synpcc7942_0642	0	0	0.658519	0.176859	0	0.0660783	0.531042
33	636888	637265	637007	0	6.52672	7.77609	6.45358	9.81745	4.80297	4.63681	0	0.252685	-0.0162585	0	-1.03142	-1.08222	Synpcc7942_0644	Dusk	0	-0.252751	-0.42258	0	1.26759	1.52564
34	653161	653753	653434	0	19.5792	17.1357	15.6168	17.1855	14.78	19.3685	0	-0.192318	-0.326223	0	-0.217549	0.172522	Synpcc7942_0657	0	0	-1.10056	-1.1329	0	1.1497	1.60435
35	749039	749449	749249	0	28.5226	10.4875	19.1174	20.2454	24.634	21.9751	0	-1.44344	-0.577221	0	0.283062	0.118278		0	0	0	0	0	0	0
36	791639	792547	791989	0	39.8123	7.54631	13.4034	33.1997	25.6895	27.1229	0	-2.39937	-1.57062	0	-0.369995	-0.291659	Synpcc7942_0797	Dusk	0	-2.20508	-2.13677	0	0.845978	0.484529
37	835425	835827	835695	0	5.82696	4.61213	3.00352	6.59524	10.577	6.14913	0	-0.337312	-0.956091	0	0.681434	-0.101043	Synpcc7942_0840	0	0	0.997489	-0.880957	0	-0.514318	-1.81876
38	842186	842660	842377	0	32.9414	30.8164	21.735	6.31994	16.2403	39.8186	0	-0.0962041	-0.599884	0	1.3616	2.65546	Synpcc7942_0847	0	0	0.154999	-0.285836	0	0.240202	-0.364957
39	853204	853986	853550	0	11.7902	4.5818	8.62169	4.54197	3.51101	5.7542	0	-1.3636	-0.451549	0	-0.371435	0.341295	Synpcc7942_0855	Dawn	0	-0.529414	-0.373983	0	2.25554	0.447851
40	901468	902050	901670	0	6.5275	6.86507	4.31122	8.15375	5.26919	4.41324	0	0.0727441	-0.598432	0	-0.629883	-0.885626	Synpcc7942_0891	0	0	-0.126835	-1.15877	0	0.325482	-0.358238
41	914969	916997	915457	0	27.5733	17.2495	22.9985	16.1514	10.1807	16.0356	0	-0.676719	-0.261734	0	-0.665823	-0.0103738	Synpcc7942_0905	Dusk	0	-2.16479	-1.61169	0	3.46348	2.85686
42	987624	988061	987743	0	9.73308	8.11978	11.4082	8.09522	4.96156	7.46928	0	-0.261455	0.229097	0	-0.706276	-0.116102		0	0	0	0	0	0	0
43	1059620	1060310	1059883	0	11.1205	7.24432	10.2643	8.21309	10.0349	6.43599	0	-0.618305	-0.115596	0	0.289026	-0.351763	Synpcc7942_1047	0	0	-3.04002	-1.80926	0	0.596519	-0.570541
44	1137896	1138205	1138014	0	4.23071	1.89934	2.48865	1.81102	2.62371	3.02322	0	-1.1554	-0.76554	0	0.534806	0.739283		0	0	0	0	0	0	0
45	1172403	1172855	1172535	0	9.29041	3.38853	5.29132	7.93188	10.6037	8.71466	0	-1.45508	-0.812114	0	0.418835	0.135782	Synpcc7942_1148	0	0	-1.87785	-2.15878	0	1.9738	3.22467
46	1175626	1175925	1175740	0	8.27417	12.0361	9.17441	7.98099	4.3794	4.32008	0	0.540681	0.149001	0	-0.865834	-0.885508	Synpcc7942_1150	Dusk	0	-0.784843	-1.04467	0	1.88605	2.04493
47	1183114	1183570	1183290	0	17.7706	8.26574	14.5544	13.7036	18.2425	18.7978	0	-1.10427	-0.288033	0	0.412753	0.456007	Synpcc7942_1156	Dusk	0	-0.0248652	-0.572265	0	0.329148	1.28573
48	1196627	1199177	1196802	0	15.446	11.6368	11.605	9.44155	13.996	26.603	0	-0.408534	-0.412487	0	0.567915	1.49449		0	0	0	0	0	0	0
49	1240269	1240906	1240485	0	14.8472	14.4594	17.808	16.8797	10.6913	7.763	0	-0.0381887	0.262336	0	-0.658857	-1.1206	Synpcc7942_1217	Dusk	0	0.591914	0.972706	0	-0.318146	-0.752179
50	1360611	1360929	1360764	0	4.64311	2.44919	2.7074	0.253618	1.758	11.3739	0	-0.92279	-0.778183	0	2.79321	5.48693	Synpcc7942_1327	Dusk	0	-0.504127	-0.852282	0	-0.144906	1.15309
51	1366876	1367271	1366994	0	7.79687	3.96984	7.41177	9.94097	6.50295	5.81083	0	-0.973815	-0.0730774	0	-0.612293	-0.774643		0	0	0	0	0	0	0
52	1398064	1398391	1398246	0	3.16081	1.78098	4.38688	3.23486	2.09264	1.38394	0	-0.827626	0.472898	0	-0.628381	-1.22492	Synpcc7942_1358	Dusk	0	0.99306	0.662841	0	-0.062444	0.559691
53	1426517	1427643	1426754	0	6.75347	6.51594	5.9265	9.16332	8.26653	8.16283	0	-0.0516561	-0.188449	0	-0.148589	-0.166801		0	0	0	0	0	0	0
54	1435756	1436257	1436110	0	5.84482	5.60066	3.31028	5.36458	8.25178	5.44437	0	-0.0615618	-0.820206	0	0.62124	0.0212987	Synpcc7942_1390	Dawn	0	-0.679988	-0.245603	0	0.47602	0.0409947
55	1441732	1442599	1442385	0	12.4816	7.71428	6.75517	5.51584	7.92122	15.4582	0	-0.694203	-0.885743	0	0.522142	1.48672		0	0	0	0	0	0	0
56	1453117	1453669	1453317	0	1.63373	1.66215	2.1937	2.12205	2.39488	3.96149	0	0.024881	0.425196	0	0.174493	0.900583	Synpcc7942_1401	0	0	0.338624	0.129205	0	0.515214	0.706682
57	1519288	1519812	1519444	0	4.94024	2.94597	3.30767	2.37615	3.72622	3.98482	0	-0.745841	-0.578766	0	0.649088	0.745888	Synpcc7942_1466	Dusk	0	-0.346359	-0.478573	0	0.767121	1.00825
58	1556258	1556735	1556558	0	7.40608	3.74079	4.9557	6.56246	9.63312	12.3714	0	-0.985366	-0.579621	0	0.553767	0.914703	Synpcc7942_1506	Dusk	0	-2.0188	-2.05069	0	2.67035	2.59128
59	1573404	1574032	1573645	0	16.5026	19.5583	14.3146	12.823	9.06425	7.89041	0	0.245087	-0.205205	0	-0.500476	-0.700564	Synpcc7942_1522	0	0	1.16617	1.21172	0	-1.12418	-0.617804
60	1598418	1599499	1599038	0	3.52638	2.20201	1.5141	3.02845	4.06027	4.95926	0	-0.679363	-1.21973	0	0.422992	0.711542		0	0	0	0	0	0	0
61	1605487	1606191	1605733	0	5.30743	5.16454	6.57519	3.845	4.10047	6.15585	0	-0.0393709	0.309021	0	0.0928066	0.678974	Synpcc7942_1548	Dawn	0	-0.576043	-1.32605	0	0.0310679	0.846678
62	1612613	1613424	1612826	0	16.2976	12.9698	18.0692	12.5872	17.2492	13.7404	0	-0.3295	0.148869	0	0.454578	0.12647	Synpcc7942_1556	Dusk	0	-0.513439	-0.627643	0	0.632842	1.79063
63	1614111	1614948	1614420	0	12.503	5.83239	6.23541	5.8498	23.4086	15.3553	0	-1.10012	-1.00372	0	2.00058	1.39227	Synpcc7942_1557	Dusk	0	-1.57773	-1.12759	0	1.70072	0.247162
64	1625891	1626168	1626054	0	4.40588	1.02704	2.9585	1.60402	8.89643	3.96666	0	-2.10094	-0.574562	0	2.47153	1.30623	Synpcc7942_1567	Dusk	0	-3.62483	-2.94276	0	2.5715	2.82417
65	1630790	1631335	1631093	0	4.90783	3.58938	1.47921	2.54032	9.76527	11.3613	0	-0.45135	-1.73026	0	1.94265	2.16105	Synpcc7942_1572	Dusk	0	-1.4311	-2.06407	0	2.01279	3.51375
66	1651122	1651396	1651221	0	2.77868	3.23283	4.80975	2.67004	4.96027	5.3817	0	0.218399	0.791562	0	0.893558	1.0112		0	0	0	0	0	0	0
67	1688959	1689347	1689161	0	6.80593	7.84088	9.57864	2.23532	3.63012	6.30972	0	0.204223	0.493027	0	0.699536	1.49709	Synpcc7942_1621	Dusk	0	-0.345443	-0.399781	0	0.134138	-0.362753
68	1689347	1689692	1689548	0	6.70995	10.0827	6.4254	4.94656	8.02172	10.6549	0	0.587503	-0.0625155	0	0.697486	1.10702	Synpcc7942_1621	Dusk	0	-0.345443	-0.399781	0	0.134138	-0.362753
69	1713964	1714782	1714184	0	9.85608	2.80013	6.18496	7.10077	10.7446	4.35739	0	-1.81552	-0.672251	0	0.597561	-0.704509	Synpcc7942_1646	Dusk	0	-2.45023	-1.76887	0	2.23875	2.27445
70	1728008	1728399	1728317	0	3.75892	1.28496	2.85401	1.23692	5.31492	4.08668	0	-1.5486	-0.397325	0	2.1033	1.72418	Synpcc7942_1656	Dusk	0	-3.03454	-1.7294	0	3.40733	3.23562
71	1729369	1729635	1729562	5.40163018000000e-315	3.63275	1.89643	4.85632	1.95449	1.44192	4.5643	0	-0.93778	0.4188	0	-0.438795	1.2236		0	0	0	0	0	0	0
72	1787507	1788028	1787755	0	8.42076	4.60419	5.62462	5.50051	6.67508	7.5551	0	-0.871001	-0.582193	0	0.279219	0.457884		0	0	0	0	0	0	0
73	1792165	1792695	1792421	0	7.67109	8.5349	10.7134	7.34859	5.02481	7.70298	0	0.153942	0.481909	0	-0.548397	0.0679494		0	0	0	0	0	0	0
74	1812450	1813090	1812756	0	2.88706	3.95979	6.57816	2.69779	4.30901	4.24562	0	0.455822	1.18808	0	0.675578	0.654196	Synpcc7942_1741	Dusk	0	-0.269692	-0.151793	0	-0.110424	-0.439307
74	1812450	1813090	1812756	0	2.88706	3.95979	6.57816	2.69779	4.30901	4.24562	0	0.455822	1.18808	0	0.675578	0.654196	Synpcc7942_1742	0	0	0.937956	0.946794	0	-1.63152	-2.15952
75	1817598	1817882	1817691	0	1.59919	1.65352	3.24695	1.07167	1.35049	3.98179	0	0.0481982	1.02175	0	0.333612	1.89355	Synpcc7942_1746	Dawn	0	-0.352247	-0.949817	0	0.705685	1.11988
76	1852175	1852937	1852393	0	3.07976	1.42651	1.02941	1.12938	2.38966	3.52813	0	-1.11033	-1.581	0	1.08127	1.64337	Synpcc7942_1784	Dusk	0	-5.13615	-3.82674	0	3.30889	4.0535
77	1874105	1874711	1874488	0	25.901	23.1561	24.6534	20.479	17.0622	16.1877	0	-0.16161	-0.0712176	0	-0.263347	-0.339249	Synpcc7942_1804	Dusk	0	-0.175465	-0.0393433	0	0.308941	0.113877
78	1895517	1895776	1895706	1.86232e-181	1.90876	3.784	1.36718	2.1984	2.20814	2.36168	0	0.987273	-0.481437	0	0.0063758	0.103363	Synpcc7942_1824	Dusk	0	-0.765807	-0.288117	0	1.24056	0.767277
79	1898811	1899797	1899004	0	34.5181	39.5566	51.7751	28.9837	27.6009	18.6236	0	0.196567	0.584907	0	-0.0705276	-0.638105		0	0	0	0	0	0	0
80	1899390	1899814	1899618	0	10.4122	5.48038	5.82956	8.64916	9.48094	7.4703	0	-0.925928	-0.836818	0	0.132469	-0.211394	Synpcc7942_1830	Dusk	0	-0.996623	-0.791905	0	1.17963	1.12411
81	1901532	1901951	1901735	0	3.96863	4.27776	6.74379	2.94709	1.86759	2.012	0	0.108215	0.764917	0	-0.658109	-0.550659	Synpcc7942_1832	Dawn	0	0.592894	0.656255	0	-1.34062	-1.4212
82	1916242	1916892	1916520	0	21.4495	3.81982	2.73278	4.6295	26.1272	35.0027	0	-2.48936	-2.9725	0	2.49662	2.91854	Synpcc7942_1849	Dusk	0	-3.48164	-3.19331	0	3.361	4.42971
83	2032491	2032957	2032751	0	16.6844	20.0312	21.3618	15.6262	15.0585	16.1937	0	0.263753	0.356539	0	-0.0533876	0.0514644	Synpcc7942_1960	Dusk	0	-0.805524	-0.732443	0	0.827039	0.755044
84	2047277	2047600	2047459	0	6.84933	7.48741	9.15685	6.212	6.77568	7.40662	0	0.128503	0.418887	0	0.125306	0.253757	Synpcc7942_1976	Dusk	0	-1.57939	-1.60302	0	1.92385	1.81669
85	2057620	2058221	2057780	0	6.19374	2.18892	2.17755	2.44317	4.92587	3.17269	0	-1.50059	-1.50811	0	1.01162	0.376951	Synpcc7942_1986	0	0	-1.36187	-1.20439	0	1.015	1.16753
85	2057620	2058221	2057780	0	6.19374	2.18892	2.17755	2.44317	4.92587	3.17269	0	-1.50059	-1.50811	0	1.01162	0.376951	Synpcc7942_1987	Dusk	0	-4.55713	-3.61012	0	2.85709	2.98501
86	2062128	2062486	2062350	0	3.55678	4.445	3.89084	2.96544	3.48401	3.60767	0	0.321611	0.12951	0	0.232503	0.282823	Synpcc7942_1991	0	0	-1.92779	-1.00574	0	0.701907	0.74514
87	2066218	2066640	2066393	0	1.9777	2.70329	3.74565	0.980098	0.869972	2.55679	0	0.450895	0.921397	0	-0.171958	1.38333	Synpcc7942_1997	0	0	5.47442	2.72465	0	-0.681228	-1.3721
88	2067694	2068210	2068019	0	8.9104	10.1157	12.9953	3.28604	3.98044	7.7288	0	0.18304	0.544424	0	0.276575	1.23389	Synpcc7942_1999	0	0	0.412717	0.662406	0	-0.597148	-1.01416
89	2137171	2137573	2137375	0	6.38072	4.76484	11.8866	3.78454	5.9388	5.40401	0	-0.42129	0.897549	0	0.650055	0.513913	Synpcc7942_2059	Dusk	0	-0.73694	-1.10647	0	0.193603	-0.0744851
90	2150274	2150681	2150455	0	21.1233	8.29475	9.3658	12.0046	18.4874	16.2381	0	-1.34856	-1.17336	0	0.622958	0.435804		0	0	0	0	0	0	0
91	2163557	2163892	2163754	0	4.17705	2.62073	2.3151	2.10615	5.54011	4.09818	0	-0.672515	-0.851411	0	1.39531	0.960377	Synpcc7942_2082	Dusk	0	-2.53685	-2.79989	0	2.72978	3.22266
92	2193499	2193996	2193727	0	2.87144	3.47447	3.98341	3.14049	2.65697	2.63544	0	0.27502	0.472233	0	-0.241208	-0.252946	Synpcc7942_2113	0	0	0.113646	0.120863	0	-0.0195532	-0.0483451
93	2263204	2263550	2263376	0	9.30127	6.09718	1.38634	2.49535	6.35749	6.82774	0	-0.609285	-2.74614	0	1.34922	1.45217	Synpcc7942_2185	Dusk	0	-1.25292	-1.71834	0	1.76948	2.1129
94	2315639	2315974	2315939	1.26712e-128	1.23466	3.02057	1.8635	2.08017	0.84071	4.50421	0	1.2907	0.593897	0	-1.30702	1.11457	Synpcc7942_2248	Dusk	0	-0.383224	-0.118048	0	-0.252646	-0.144726
95	2324543	2325093	2324839	0	6.84384	2.21875	2.7381	3.66556	5.80402	13.0141	0	-1.62506	-1.32163	0	0.663018	1.82797	Synpcc7942_2254	Dusk	0	-1.82046	-2.28566	0	1.5013	4.49372
96	2335580	2336042	2335777	0	27.2617	19.3767	21.6318	22.5009	30.4641	22.7304	0	-0.492551	-0.333723	0	0.437129	0.0146408	Synpcc7942_2267	Dusk	0	-0.28044	-0.0884395	0	0.563132	0.481797
97	2347403	2347674	2347507	0	4.07906	5.24355	4.74167	1.49722	3.06437	2.39259	0	0.362305	0.217158	0	1.0333	0.676281	Synpcc7942_2279	Dusk	0	0.782987	-0.238147	0	-0.879021	-0.978715
98	2373685	2374530	2374073	0	10.1187	7.56043	12.7049	7.26477	9.94614	10.7497	0	-0.420484	0.328361	0	0.453219	0.5653	Synpcc7942_2306	Dusk	0	-1.37745	-1.35233	0	2.06469	2.12305
99	2393314	2393641	2393480	0	8.28604	3.89968	4.8252	6.54652	10.5575	6.54883	0	-1.08733	-0.780094	0	0.689473	0.000509384	Synpcc7942_2326	Dusk	0	-1.16961	-1.37653	0	1.56529	1.7581
100	2404167	2404726	2404498	0	35.3023	22.5623	25.879	30.5392	41.7764	32.1949	0	-0.645847	-0.447981	0	0.452025	0.076167	Synpcc7942_2336	Dusk	0	-1.0104	-1.30809	0	1.55722	1.97203
101	2445116	2445482	2445280	0	5.15139	4.46448	3.07339	3.28105	4.12171	6.53895	0	-0.20647	-0.745129	0	0.329085	0.994899	Synpcc7942_2378	Dusk	0	-0.354087	-0.300176	0	-0.0538055	-0.179962
102	2460284	2460658	2460511	0	6.12499	4.8531	5.48494	0.576441	4.89948	7.36504	0	-0.335803	-0.159233	0	3.08739	3.67545	Synpcc7942_2388	Dusk	0	-2.76255	-1.86614	0	2.34815	3.28334
103	2471156	2471603	2471370	0	10.3432	9.72218	16.2404	8.1213	6.85992	11.6717	0	-0.0893312	0.650902	0	-0.243519	0.523227	Synpcc7942_2395	0	0	-0.432303	-0.221702	0	0.0724113	0.248129
104	2484808	2485533	2485130	0	7.46547	20.6647	13.3849	9.73175	7.36341	9.34943	0	1.46887	0.842304	0	-0.402325	-0.0578197		0	0	0	0	0	0	0
105	2540936	2541499	2541293	0	7.89308	5.65039	5.95924	7.54488	6.18615	4.09816	0	-0.482237	-0.40546	0	-0.286457	-0.880523		0	0	0	0	0	0	0
106	2546605	2547198	2547021	0	5.62182	4.53282	5.68873	4.38393	6.69016	4.88225	0	-0.310629	0.0170697	0	0.609816	0.155322	Synpcc7942_2465	0	0	-0.378572	-0.382724	0	0.950244	0.792226
107	2554781	2555108	2554948	0	4.89621	5.39462	9.62179	4.40792	6.87533	6.82922	0	0.139856	0.974639	0	0.641333	0.631624	Synpcc7942_2473	0	0	-0.787665	-0.897674	0	0.233533	0.345426
108	2568147	2568689	2568492	0	4.29811	5.56037	4.08987	3.08178	6.14427	5.27331	0	0.371477	-0.0716489	0	0.995478	0.774946	Synpcc7942_2486	Dusk	0	-0.72992	-0.533094	0	1.87759	1.84169
108	2568147	2568689	2568492	0	4.29811	5.56037	4.08987	3.08178	6.14427	5.27331	0	0.371477	-0.0716489	0	0.995478	0.774946	Synpcc7942_2487	Dusk	0	-0.393975	-0.291296	0	0.950032	0.494049
109	2604948	2605368	2605104	0	7.85862	4.36664	5.32961	3.88253	6.9338	6.02114	0	-0.847752	-0.560246	0	0.836648	0.633039	Synpcc7942_2524	0	0	1.27833	1.43215	0	-1.25097	-0.745902
110	2607364	2607654	2607504	0	8.75715	4.89871	5.85904	6.98911	8.10425	7.79617	0	-0.838059	-0.579797	0	0.213569	0.157657	Synpcc7942_2526	0	0	-0.0872325	-0.128633	0	0.349682	0.613587
111	2636260	2636562	2636404	0	8.3431	5.0637	4.9767	8.03609	7.42699	6.74173	0	-0.720392	-0.745395	0	-0.113715	-0.253375	Synpcc7942_2557	Dusk	0	-0.943434	-1.3286	0	0.9556	1.93709
112	2673886	2674317	2674083	0	3.98741	1.0812	1.41348	0.828409	3.58695	11.5423	0	-1.88282	-1.4962	0	2.11434	3.80044	Synpcc7942_2590	Dusk	0	-3.00845	-2.5743	0	3.44822	5.28576
113	2683719	2684392	2683869	0	2.43727	1.80165	3.53965	2.71715	4.59693	3.82934	0	-0.435947	0.538341	0	0.758574	0.495	Synpcc7942_2601	0	0	-1.95698	-1.01296	0	3.0833	2.68495
113	2683719	2684392	2683869	0	2.43727	1.80165	3.53965	2.71715	4.59693	3.82934	0	-0.435947	0.538341	0	0.758574	0.495	Synpcc7942_2602	Dusk	0	-1.52996	-0.814146	0	3.18577	2.78128
114	2687881	2688959	2688106	0	6.89902	4.30534	5.68161	8.15653	5.16485	6.00331	0	-0.680264	-0.280093	0	-0.659229	-0.442196	Synpcc7942_2605	0	0	-0.904896	-0.974338	0	1.0261	1.07482

## Sheet: Replicate 1
					Enrichment over mock at peak max location						Log2 normalized change in enrichment from original condition								Log2 normalized change in gene target expression from original condition
					Minutes in High Light pulse			Minutes in Shade pulse			Minutes in High Light pulse			Minutes in Shade pulse					Minutes in High Light pulse			Minutes in Shade pulse
					0	15	60	0	15	60	0	15	60	0	15	60			0	15	60	0	15	60
					Hours since dawn			Hours since dawn			Hours since dawn			Hours since dawn					Hours since dawn			Hours since dawn
RpaA Peak #	Start	End	Peak max location	Q-value	8	8.25	9	8	8.25	9	8	8.25	9	8	8.25	9	Gene target of peak	High confidence class of gene target	8	8.25	9	8	8.25	9
1	11911	12431	12206	0	5.6462	5.29173	5.04608	7.06065	7.86819	7.76153	0	-0.0935396	-0.162116	0	0.15623	0.136539	Synpcc7942_0012	0	0	0.425146	1.2217	0	0.425946	0.476063
1	11911	12431	12206	0	5.6462	5.29173	5.04608	7.06065	7.86819	7.76153	0	-0.0935396	-0.162116	0	0.15623	0.136539	Synpcc7942_0013	0	0	1.21077	-1.12939	0	-2.22239	-1.29046
2	32768	34527	33882	0	28.7597	14.0789	16.7866	16.8497	21.2297	27.1237	0	-1.03051	-0.776735	0	0.333363	0.686833	Synpcc7942_0033	Dusk	0	1.12577	-0.505316	0	1.4471	2.4366
3	52948	54477	53585	0	3.29395	2.43736	3.22792	3.84328	3.94707	3.64409	0	-0.434496	-0.0292146	0	0.0384451	-0.0767797		0	0	0	0	0	0	0
4	54732	55281	55152	0	3.35515	2.56116	3.12847	3.99796	4.21906	3.37754	0	-0.389581	-0.10092	0	0.0776593	-0.243291	Synpcc7942_0052	0	0	0.133805	-0.427314	0	0.752386	-0.0419932
5	58137	59366	58304	3.0e-322	3.80322	2.32095	2.60573	4.16316	5.68504	5.14325	0	-0.712503	-0.545532	0	0.449493	0.305003	Synpcc7942_0055	0	0	-0.685695	-1.94376	0	2.2244	2.18967
6	93197	93782	93465	0	6.59442	5.4791	7.33361	6.289	4.88453	4.38301	0	-0.267307	0.153279	0	-0.364612	-0.520908	Synpcc7942_0095	0	0	0.0984561	-0.219796	0	0.291745	-0.0401551
7	100994	101323	101112	3.96739e-231	3.84806	3.53913	5.15057	4.00135	5.27447	4.16369	0	-0.120735	0.420601	0	0.398539	0.0573783	Synpcc7942_0100	Dusk	0	-3.96002	-2.75936	0	3.0796	4.45288
7	100994	101323	101112	3.96739e-231	3.84806	3.53913	5.15057	4.00135	5.27447	4.16369	0	-0.120735	0.420601	0	0.398539	0.0573783	Synpcc7942_0101	Dawn	0	0.684045	0.296839	0	-0.629991	-0.164333
8	129336	129778	129461	9.26088e-79	3.87216	3.34224	3.86342	3.94278	3.73372	2.91074	0	-0.212324	-0.00326091	0	-0.0785998	-0.437827	Synpcc7942_0130	0	0	-0.641199	-0.860655	0	1.15905	0.634788
9	152205	152784	152309	4.88626e-130	2.72009	2.1063	2.04685	3.12605	3.958	3.25973	0	-0.368939	-0.410245	0	0.340433	0.0604141		0	0	0	0	0	0	0
10	170496	171097	170791	0	60.901	34.439	49.5491	41.7625	53.5268	72.4278	0	-0.822422	-0.297605	0	0.358051	0.794334		0	0	0	0	0	0	0
11	178174	179255	178359	0	12.4885	6.82325	9.94054	14.5334	19.2838	13.3932	0	-0.872071	-0.329206	0	0.408023	-0.117868		0	0	0	0	0	0	0
12	179250	180364	179936	0	2.64778	1.97284	2.25178	3.09251	3.80654	4.01867	0	-0.424508	-0.233714	0	0.299702	0.37794	Synpcc7942_0181	0	0	-0.60926	-1.02353	0	2.69278	2.1961
13	203940	204366	204131	2.28213e-224	4.41839	3.44226	3.72266	6.58346	6.62801	6.31926	0	-0.360163	-0.247185	0	0.00973054	-0.0590904	Synpcc7942_0202	0	0	-0.65266	-0.554713	0	0.3247	-0.255412
14	242012	242491	242255	0	6.42442	1.41953	2.35773	4.18464	13.4691	18.8065	0	-2.17816	-1.44617	0	1.68648	2.16806	Synpcc7942_0245	Dusk	0	-2.33872	-1.58077	0	1.45376	2.20725
14	242012	242491	242255	0	6.42442	1.41953	2.35773	4.18464	13.4691	18.8065	0	-2.17816	-1.44617	0	1.68648	2.16806	Synpcc7942_0246	0	0	-0.245479	-0.130995	0	-0.652796	-0.933333
15	258312	258635	258466	5.64781e-138	2.58109	2.90439	2.16943	2.58435	2.69679	5.09676	0	0.170256	-0.250663	0	0.0614453	0.979781	Synpcc7942_0260	0	0	0.0255405	-0.311829	0	0.246643	-0.243962
16	263181	264141	263365	3.99145e-247	2.74612	2.06579	1.56439	3.10601	5.3818	5.18751	0	-0.410704	-0.811792	0	0.793025	0.73998	Synpcc7942_0267	Dusk	0	-1.77245	-1.99052	0	2.7702	3.20719
17	288095	288593	288275	5.60553e-60	2.2996	3.16525	3.64115	3.44523	2.41508	1.99004	0	0.460935	0.663012	0	-0.512528	-0.791805		0	0	0	0	0	0	0
18	314265	314972	314742	0	9.92751	2.00772	5.80863	11.2209	19.7113	12.1262	0	-2.30587	-0.773234	0	0.812828	0.111929	Synpcc7942_0316	Dusk	0	-1.52955	-1.51625	0	2.19657	1.48221
18	314265	314972	314742	0	9.92751	2.00772	5.80863	11.2209	19.7113	12.1262	0	-2.30587	-0.773234	0	0.812828	0.111929	Synpcc7942_0317	0	0	-0.136911	-0.463053	0	0.337553	0.46354
19	335898	336292	336090	1.595e-198	6.12024	5.5774	6.50443	5.5588	7.65054	8.98282	0	-0.133995	0.0878335	0	0.460788	0.692396		0	0	0	0	0	0	0
20	361938	362218	362084	2.97042e-118	2.03709	0.913528	0.773262	0.981264	3.79037	4.35441	0	-1.15699	-1.39748	0	1.94962	2.14976	Synpcc7942_0369	Dusk	0	-2.40498	-1.44618	0	1.39249	1.49724
21	372095	372650	372245	0	4.53327	4.03204	4.34368	4.97524	3.79734	4.87643	0	-0.169043	-0.061633	0	-0.389777	-0.0289407	Synpcc7942_0377	Dusk	0	-1.39848	-1.35675	0	1.50618	1.75389
21	372095	372650	372245	0	4.53327	4.03204	4.34368	4.97524	3.79734	4.87643	0	-0.169043	-0.061633	0	-0.389777	-0.0289407	Synpcc7942_0378	Dusk	0	0.0422772	-0.302692	0	0.437271	0.910527
22	388087	388592	388213	0	4.62449	2.14231	2.60597	5.01941	7.98605	7.62266	0	-1.11013	-0.827475	0	0.669962	0.602775	Synpcc7942_0395	0	0	0.45502	0.821175	0	0.193839	-0.0888356
23	413547	414059	413758	0	5.3912	1.68619	2.42347	3.66794	3.9784	3.15591	0	-1.67684	-1.15353	0	0.11722	-0.21691	Synpcc7942_0423	Dusk	0	-1.22173	-1.16507	0	1.34691	1.52473
23	413547	414059	413758	0	5.3912	1.68619	2.42347	3.66794	3.9784	3.15591	0	-1.67684	-1.15353	0	0.11722	-0.21691	Synpcc7942_0424	0	0	-1.9288	-0.790619	0	0.944799	0.231823
24	423319	423797	423483	1.43874e-140	1.86539	0.773052	1.13119	1.72182	3.10635	4.05116	0	-1.27084	-0.721633	0	0.851289	1.2344	Synpcc7942_0433	0	0	-3.60945	-1.87166	0	2.12089	1.56042
25	445027	445834	445489	0	54.0805	43.6863	47.7534	43.5235	46.56	38.1092	0	-0.307927	-0.179505	0	0.0972977	-0.191656		0	0	0	0	0	0	0
26	456581	456928	456739	1.24816e-96	3.50203	3.42142	4.03455	3.51126	3.15687	4.26569	0	-0.0335961	0.204216	0	-0.153495	0.280789	Synpcc7942_0469	Dawn	0	0.223741	0.231885	0	-0.216359	-0.490867
26	456581	456928	456739	1.24816e-96	3.50203	3.42142	4.03455	3.51126	3.15687	4.26569	0	-0.0335961	0.204216	0	-0.153495	0.280789	Synpcc7942_0470	0	0	-1.8071	-1.66285	0	0.666818	0.338486
27	469163	469540	469345	1.24797e-94	4.16094	3.52184	3.33383	2.82092	3.01187	4.43689	0	-0.240581	-0.31973	0	0.0944949	0.653383	Synpcc7942_0483	Dusk	0	0.198801	0.377267	0	-0.116525	-0.618878
28	479275	479817	479463	0	5.96146	3.97049	4.87395	6.44407	7.43309	6.59819	0	-0.586346	-0.290574	0	0.20599	0.0340986	Synpcc7942_0491	Dusk	0	-1.32753	-2.81464	0	0.813714	2.08395
29	539011	539453	539262	5.55448e-250	3.80957	3.53611	3.332	4.29239	5.46428	5.22224	0	-0.107464	-0.193239	0	0.348249	0.282885	Synpcc7942_0556	Dusk	0	-0.929358	-0.949007	0	1.79888	1.59667
29	539011	539453	539262	5.55448e-250	3.80957	3.53611	3.332	4.29239	5.46428	5.22224	0	-0.107464	-0.193239	0	0.348249	0.282885	Synpcc7942_0557	0	0	-0.43357	0.181447	0	0.873649	1.44416
30	546381	546704	546534	3.81468e-71	3.18033	2.25176	2.0894	3.04407	3.729	3.16794	0	-0.49812	-0.606089	0	0.292787	0.0575467		0	0	0	0	0	0	0
31	555035	555349	555202	1.15409e-278	3.59743	3.67986	4.69753	4.81994	5.97132	4.82597	0	0.032683	0.384935	0	0.309034	0.00180365	Synpcc7942_0572	0	0	-1.58937	-1.1651	0	1.36142	1.60803
32	588274	588585	588444	5.03803e-101	3.19876	2.64202	1.72346	1.41221	2.63547	7.22221	0	-0.275869	-0.892205	0	0.900106	2.35449	Synpcc7942_0599	Dusk	0	-2.08077	-2.54824	0	1.40549	2.87543
33	636888	637265	637032	9.44727e-229	3.98809	6.39651	5.7151	8.45847	7.00224	5.0348	0	0.681587	0.51908	0	-0.272581	-0.748461	Synpcc7942_0642	0	0	0.923451	0.380816	0	0.00404529	0.2546
33	636888	637265	637032	9.44727e-229	3.98809	6.39651	5.7151	8.45847	7.00224	5.0348	0	0.681587	0.51908	0	-0.272581	-0.748461	Synpcc7942_0644	Dusk	0	-0.463625	-0.619954	0	1.3335	1.36437
34	653161	653753	653468	0	29.0056	15.9355	18.5893	20.4383	20.9347	23.4957	0	-0.864088	-0.641857	0	0.0346219	0.201119	Synpcc7942_0657	0	0	-1.2063	-1.42999	0	0.699836	0.857626
35	749039	749449	749266	0	24.0591	11.5193	21.1506	23.897	32.4615	27.6394	0	-1.06253	-0.18588	0	0.4419	0.209899		0	0	0	0	0	0	0
36	791639	792547	791961	0	55.6315	10.6955	13.1469	36.8099	31.0548	33.545	0	-2.3789	-2.08118	0	-0.245279	-0.133993	Synpcc7942_0797	Dusk	0	-0.958666	-1.58167	0	0.992268	-0.533931
37	835425	835827	835678	1.88118e-166	2.50701	2.35017	1.93183	4.40164	4.01039	4.38797	0	-0.093208	-0.375998	0	-0.134299	-0.00448664	Synpcc7942_0840	0	0	0.670306	0.666773	0	-2.44881	-1.10317
38	842186	842660	842406	0	37.254	24.7171	22.3101	8.96171	17.5139	41.9746	0	-0.591888	-0.739701	0	0.96665	2.22767	Synpcc7942_0847	0	0	0.222097	-0.233293	0	0.140232	-0.458937
39	853204	853986	853521	0	6.20231	2.39913	4.66097	4.68488	3.03227	3.60835	0	-1.37029	-0.412175	0	-0.627613	-0.376675	Synpcc7942_0855	Dawn	0	-1.00371	-1.20228	0	2.70501	0.367168
40	901468	902050	901660	4.04695e-151	3.53559	4.24726	4.07685	5.51364	3.55244	4.37338	0	0.264581	0.205502	0	-0.634196	-0.334255	Synpcc7942_0891	0	0	-0.927076	-0.71872	0	1.3616	1.17883
41	914969	916997	915444	0	15.4881	11.8345	14.1133	12.6763	5.46873	10.5813	0	-0.388165	-0.134113	0	-1.21286	-0.260624	Synpcc7942_0905	Dusk	0	-1.87956	-1.59865	0	3.76307	2.81495
42	987624	988061	987765	2.44618e-242	6.58353	6.24728	9.24994	5.49139	5.1203	6.06796	0	-0.0756352	0.490582	0	-0.100944	0.14404		0	0	0	0	0	0	0
43	1059620	1060310	1059822	0	10.6754	4.34284	8.08396	9.91567	11.3328	7.59367	0	-1.29758	-0.40116	0	0.192721	-0.384913	Synpcc7942_1047	0	0	-3.52226	-2.85594	0	1.46989	-1.47725
44	1137896	1138205	1138054	0	5.51451	2.52978	3.31904	3.51898	3.53035	3.72564	0	-1.12422	-0.732468	0	0.00465311	0.0823297		0	0	0	0	0	0	0
45	1172403	1172855	1172560	0	5.63513	3.33549	2.69852	5.4248	7.56836	7.69175	0	-0.75655	-1.06228	0	0.48041	0.503741	Synpcc7942_1148	0	0	-1.99263	-2.06959	0	2.65918	3.67458
46	1175626	1175925	1175764	1.13782e-233	6.77052	7.6529	7.39876	5.61217	5.40657	6.40055	0	0.17674	0.128017	0	-0.0538455	0.189637	Synpcc7942_1150	Dusk	0	-1.07517	-1.37765	0	1.25769	1.82257
47	1183114	1183570	1183261	0	24.2792	13.3778	14.6845	15.9828	23.8174	27.9519	0	-0.859882	-0.725433	0	0.575495	0.806429	Synpcc7942_1156	Dusk	0	-0.373269	-0.800878	0	0.668026	1.68078
48	1196627	1199177	1196818	0	17.3101	7.20029	5.96976	7.64484	12.1066	20.8408	0	-1.26549	-1.53587	0	0.663231	1.44685		0	0	0	0	0	0	0
49	1240269	1240906	1240487	0	8.41312	8.04477	12.4135	12.0712	7.37899	5.63986	0	-0.0645888	0.561193	0	-0.710075	-1.09784	Synpcc7942_1217	Dusk	0	-0.381442	0.0949267	0	-0.316488	-1.19944
50	1360611	1360929	1360759	0	4.29863	2.58151	1.69887	1.38833	2.56138	12.0899	0	-0.735661	-1.3393	0	0.883575	3.12239	Synpcc7942_1327	Dusk	0	-0.795795	-1.07335	0	0.130816	1.07169
51	1366876	1367271	1366987	6.63471e-129	4.04464	3.41213	3.92745	4.57416	4.64837	5.08181	0	-0.245337	-0.0424177	0	0.0232196	0.151836		0	0	0	0	0	0	0
52	1398064	1398391	1398244	7.33723e-109	2.55286	3.4197	3.55366	3.62418	2.34481	2.14806	0	0.421756	0.477192	0	-0.628183	-0.754619	Synpcc7942_1358	Dusk	0	0.468851	0.204241	0	0.533155	1.18091
53	1426517	1427643	1426800	1.00138e-227	3.00828	2.40509	2.48877	3.64191	4.01602	4.26576	0	-0.322849	-0.273507	0	0.141072	0.228109		0	0	0	0	0	0	0
54	1435756	1436257	1436118	1.59135e-114	3.62871	3.19789	3.45359	5.10367	5.81984	5.08696	0	-0.182336	-0.0713608	0	0.189445	-0.00473209	Synpcc7942_1390	Dawn	0	-0.498437	-0.337583	0	-0.0164835	-1.13046
55	1441732	1442599	1442371	0	8.87657	4.94252	4.09331	3.93555	4.88872	10.6032	0	-0.844756	-1.11674	0	0.312892	1.42987		0	0	0	0	0	0	0
56	1453117	1453669	1453254	1.55715e-67	2.93462	1.58162	1.75727	2.61136	3.38188	3.9593	0	-0.891773	-0.739836	0	0.373026	0.600447	Synpcc7942_1401	0	0	0.289315	0.247915	0	-0.233466	0.434107
57	1519288	1519812	1519434	3.56611e-116	3.79456	2.14398	2.87964	2.95138	3.19149	3.62021	0	-0.823639	-0.398042	0	0.112837	0.294682	Synpcc7942_1466	Dusk	0	-0.411039	-0.61368	0	0.204302	0.68313
58	1556258	1556735	1556572	0	4.47088	3.26951	2.71403	7.24979	12.3541	11.5611	0	-0.451482	-0.72012	0	0.768983	0.673265	Synpcc7942_1506	Dusk	0	-2.07723	-2.14995	0	2.855	2.60092
59	1573404	1574032	1573640	0	8.86885	14.2484	12.885	10.6587	6.54399	7.99333	0	0.683976	0.538875	0	-0.703792	-0.415167	Synpcc7942_1522	0	0	0.733427	0.69502	0	-1.25257	-0.586331
60	1598418	1599499	1599099	0	3.46829	2.55168	2.23946	3.64133	5.11697	5.61452	0	-0.44278	-0.631075	0	0.490823	0.624696		0	0	0	0	0	0	0
61	1605487	1606191	1605665	0	8.56838	4.71653	4.92715	6.15416	7.10481	11.0875	0	-0.861296	-0.798268	0	0.207233	0.849296	Synpcc7942_1548	Dawn	0	-0.58113	-0.2129	0	1.2676	0.632322
62	1612613	1613424	1612816	0	11.5655	12.8582	17.2451	15.8354	16.119	14.5944	0	0.152853	0.576357	0	0.0256148	-0.117739	Synpcc7942_1556	Dusk	0	-0.787032	-0.961981	0	1.17033	2.15068
63	1614111	1614948	1614421	0	18.1231	4.4886	6.37097	7.3533	26.0239	20.3915	0	-2.01349	-1.50824	0	1.82337	1.4715	Synpcc7942_1557	Dusk	0	-0.904593	-0.421132	0	1.10302	-0.604833
64	1625891	1626168	1626048	6.69189e-209	3.67526	1.11633	1.49001	2.92711	7.97023	6.93027	0	-1.71907	-1.30252	0	1.44515	1.24344	Synpcc7942_1567	Dusk	0	-4.48295	-2.56442	0	1.84481	2.16406
65	1630790	1631335	1631095	0	4.13617	1.9289	1.48093	3.02313	9.53572	11.8409	0	-1.10052	-1.48179	0	1.6573	1.96966	Synpcc7942_1572	Dusk	0	-1.61315	-1.98175	0	2.68781	4.04005
66	1651122	1651396	1651225	4.13009e-94	4.55959	3.0412	4.29102	4.38952	4.8002	5.46854	0	-0.584266	-0.0875842	0	0.129033	0.317095		0	0	0	0	0	0	0
67	1688959	1689347	1689158	0	8.51985	7.32502	8.88084	3.67352	4.05819	5.45277	0	-0.217997	0.0598684	0	0.143671	0.569823	Synpcc7942_1621	Dusk	0	-0.0602115	0.118635	0	-0.252677	-0.815411
68	1689347	1689692	1689517	5.70411e-199	6.49646	6.90175	6.91628	6.97937	7.67677	7.9894	0	0.0873095	0.0903437	0	0.137402	0.19499	Synpcc7942_1621	Dusk	0	-0.0602115	0.118635	0	-0.252677	-0.815411
69	1713964	1714782	1714171	0	7.5193	2.03903	3.95657	7.24542	9.51842	5.84718	0	-1.88272	-0.926347	0	0.393654	-0.309327	Synpcc7942_1646	Dusk	0	-2.28818	-1.72718	0	2.18218	2.07103
70	1728008	1728399	1728275	3.78518e-137	3.40117	1.46572	2.04063	2.55198	4.12465	4.05872	0	-1.21442	-0.737015	0	0.692653	0.669407	Synpcc7942_1656	Dusk	0	-3.2094	-1.75561	0	2.71835	2.43858
71	1729369	1729635	1729454	2.63056e-86	3.633	2.26442	3.00075	2.32904	3.10919	3.18404	0	-0.682021	-0.27584	0	0.4168	0.451121		0	0	0	0	0	0	0
72	1787507	1788028	1787757	0	6.13004	3.00977	3.77705	5.3651	7.42669	7.75687	0	-1.02624	-0.698638	0	0.469115	0.53187		0	0	0	0	0	0	0
73	1792165	1792695	1792424	8.28592e-269	6.25237	6.01326	5.80868	3.75433	3.92607	6.25547	0	-0.0562569	-0.106195	0	0.0645308	0.736563		0	0	0	0	0	0	0
74	1812450	1813090	1812607	0	5.41366	3.69135	5.93147	4.64395	5.15675	5.06327	0	-0.552457	0.131785	0	0.15111	0.124718	Synpcc7942_1741	Dusk	0	-0.0419619	0.095188	0	-0.46643	-0.652238
74	1812450	1813090	1812607	0	5.41366	3.69135	5.93147	4.64395	5.15675	5.06327	0	-0.552457	0.131785	0	0.15111	0.124718	Synpcc7942_1742	0	0	0.959684	0.92743	0	-1.86657	-2.41636
75	1817598	1817882	1817783	1.62534e-74	2.88094	2.77453	3.85316	2.63441	3.37266	3.63848	0	-0.0542994	0.4195	0	0.35641	0.465856	Synpcc7942_1746	Dawn	0	-0.385772	-1.51449	0	0.662661	1.27823
76	1852175	1852937	1852319	5.4564e-230	4.00619	1.52857	1.43788	2.1002	4.86129	6.31998	0	-1.39005	-1.47829	0	1.21081	1.58939	Synpcc7942_1784	Dusk	0	-5.46798	-4.33335	0	3.22948	3.94014
77	1874105	1874711	1874473	0	59.0489	25.2614	30.2514	37.8447	30.4622	27.8676	0	-1.22498	-0.96491	0	-0.313073	-0.441501	Synpcc7942_1804	Dusk	0	-0.331542	-0.174519	0	0.415013	0.138542
78	1895517	1895776	1895656	4.80182e-66	3.12394	3.56927	4.11219	5.02414	4.3059	3.99676	0	0.192262	0.396538	0	-0.222563	-0.330045	Synpcc7942_1824	Dusk	0	-0.340771	-0.425019	0	0.964719	0.767755
79	1898811	1899797	1898997	0	38.2752	33.5557	37.1811	29.1471	27.2677	19.964	0	-0.189852	-0.0418427	0	-0.0961595	-0.545951		0	0	0	0	0	0	0
80	1899390	1899814	1899579	1.07185e-304	4.23924	2.80038	2.70865	4.51717	5.04118	4.85757	0	-0.598183	-0.64623	0	0.158343	0.104816	Synpcc7942_1830	Dusk	0	-1.01668	-1.02626	0	1.02559	0.600026
81	1901532	1901951	1901741	2.05902e-158	2.48305	3.2362	4.34544	2.68813	1.67327	1.89671	0	0.382186	0.807386	0	-0.68393	-0.503101	Synpcc7942_1832	Dawn	0	1.04706	1.07217	0	-1.13713	-1.53233
82	1916242	1916892	1916510	0	14.6676	2.10163	2.17893	3.18484	15.0242	27.1619	0	-2.80305	-2.75094	0	2.23799	3.09229	Synpcc7942_1849	Dusk	0	-4.5666	-4.20942	0	2.90001	4.11008
83	2032491	2032957	2032756	0	13.3494	16.7557	24.8595	16.4481	18.9378	18.0845	0	0.327875	0.897022	0	0.203349	0.136836	Synpcc7942_1960	Dusk	0	-0.597938	-0.446793	0	0.630673	0.542544
84	2047277	2047600	2047456	6.18874e-208	5.67096	4.82439	5.13867	5.20677	5.23167	6.50254	0	-0.233245	-0.142196	0	0.00688443	0.320615	Synpcc7942_1976	Dusk	0	-1.29382	-1.45857	0	1.84318	1.60508
85	2057620	2058221	2057749	6.68129e-287	4.5372	1.59154	1.90343	3.41275	4.31095	4.36537	0	-1.51138	-1.2532	0	0.33707	0.355169	Synpcc7942_1986	0	0	-1.17206	-1.04309	0	1.05526	1.3277
85	2057620	2058221	2057749	6.68129e-287	4.5372	1.59154	1.90343	3.41275	4.31095	4.36537	0	-1.51138	-1.2532	0	0.33707	0.355169	Synpcc7942_1987	Dusk	0	-4.40625	-3.88356	0	2.5245	2.14041
86	2062128	2062486	2062320	3.90682e-81	3.1603	2.19234	2.80923	2.34182	3.29211	3.92286	0	-0.527589	-0.169885	0	0.491382	0.744276	Synpcc7942_1991	0	0	-3.02395	-1.26491	0	0.418463	0.420105
87	2066218	2066640	2066373	0	5.22667	6.98342	4.46488	3.99047	3.56233	3.77164	0	0.418041	-0.227271	0	-0.163737	-0.081368	Synpcc7942_1997	0	0	5.99987	2.4079	0	-1.76149	-2.88533
88	2067694	2068210	2068009	0	15.9624	16.0121	16.333	6.80999	6.60476	13.1684	0	0.0044881	0.0331101	0	-0.044146	0.951357	Synpcc7942_1999	0	0	0.145988	0.390514	0	-0.558718	-0.965831
89	2137171	2137573	2137375	0	8.23642	8.95456	12.4873	7.21942	7.38864	7.32664	0	0.120606	0.600377	0	0.0334265	0.0212685	Synpcc7942_2059	Dusk	0	0.0161863	0.124239	0	-0.21632	-0.565699
90	2150274	2150681	2150456	0	6.84596	4.40958	4.16056	7.83699	9.49095	11.9803	0	-0.63461	-0.718475	0	0.276253	0.612293		0	0	0	0	0	0	0
91	2163557	2163892	2163751	1.51557e-81	3.49465	3.50149	3.48577	3.66879	3.89742	3.19237	0	0.00281792	-0.00367119	0	0.087215	-0.200676	Synpcc7942_2082	Dusk	0	-2.31155	-3.05016	0	2.04838	2.7111
92	2193499	2193996	2193712	8.8961e-154	2.45747	3.64997	3.85462	3.53294	2.71142	3.01809	0	0.570712	0.649413	0	-0.381818	-0.227233	Synpcc7942_2113	0	0	-0.101587	0.0104237	0	-0.193409	-0.0494128
93	2263204	2263550	2263381	1.4997e-257	4.13951	2.8571	2.63622	4.96015	6.93027	6.72412	0	-0.534907	-0.650987	0	0.482528	0.438962	Synpcc7942_2185	Dusk	0	-0.885712	-1.14749	0	1.62167	2.1635
94	2315639	2315974	2315893	1.32301e-67	2.37136	1.60944	1.91527	1.48526	2.02027	5.31197	0	-0.559159	-0.308169	0	0.443835	1.83853	Synpcc7942_2248	Dusk	0	-0.422007	-0.619828	0	-0.326576	-0.920214
95	2324543	2325093	2324842	8.75313e-198	2.71013	1.31813	1.36083	1.92811	2.98655	8.03448	0	-1.03987	-0.993872	0	0.63129	2.05901	Synpcc7942_2254	Dusk	0	-1.65664	-2.96641	0	2.41908	5.78835
96	2335580	2336042	2335785	0	24.126	20.0841	20.7779	24.0664	26.5284	23.3569	0	-0.264529	-0.215538	0	0.140512	-0.0431774	Synpcc7942_2267	Dusk	0	-0.249769	0.016037	0	0.207032	0.60104
97	2347403	2347674	2347512	4.47569e-132	4.55741	3.48978	3.77736	2.33328	2.61385	2.72326	0	-0.385076	-0.270833	0	0.163818	0.222973	Synpcc7942_2279	Dusk	0	-0.15754	0.547837	0	-0.942713	-0.662819
98	2373685	2374530	2374103	0	7.45492	7.40049	6.32812	7.73871	8.20526	9.99705	0	-0.0105717	-0.236417	0	0.0844562	0.36941	Synpcc7942_2306	Dusk	0	-1.36634	-1.77675	0	1.69679	1.5558
99	2393314	2393641	2393476	0	4.68522	4.59319	2.89926	7.58536	10.3858	8.24258	0	-0.0286229	-0.692434	0	0.453323	0.119878	Synpcc7942_2326	Dusk	0	-1.75341	-1.40331	0	0.860406	1.41392
100	2404167	2404726	2404496	0	29.3965	20.0812	21.6586	34.4904	41.2367	37.639	0	-0.549794	-0.4407	0	0.257736	0.126035	Synpcc7942_2336	Dusk	0	-1.47282	-2.10284	0	2.47481	2.38913
101	2445116	2445482	2445254	4.81193e-286	5.22445	2.81085	2.99188	3.20822	5.64132	7.45645	0	-0.894271	-0.804227	0	0.814261	1.21672	Synpcc7942_2378	Dusk	0	-0.339963	-0.0392763	0	0.106061	-0.414992
102	2460284	2460658	2460498	9.12244e-194	4.57675	3.02786	3.78479	3.05082	4.89666	7.66215	0	-0.596025	-0.274108	0	0.682603	1.32855	Synpcc7942_2388	Dusk	0	-2.49459	-2.68725	0	2.65119	2.79667
103	2471156	2471603	2471345	0	16.5628	13.8899	19.4538	10.9799	11.0426	17.767	0	-0.253909	0.232103	0	0.00822179	0.694341	Synpcc7942_2395	0	0	-0.392649	-0.709842	0	0.478864	0.683896
104	2484808	2485533	2485119	0	5.10857	10.7935	9.51029	6.0578	5.9338	6.04673	0	1.07917	0.896571	0	-0.0298365	-0.00263754		0	0	0	0	0	0	0
105	2540936	2541499	2541230	3.64051e-96	4.20885	4.58133	4.68596	6.34503	5.59969	4.13005	0	0.122341	0.154918	0	-0.180279	-0.619467		0	0	0	0	0	0	0
106	2546605	2547198	2547028	0	5.7028	4.73603	7.48913	6.17159	7.60851	7.56031	0	-0.267995	0.393127	0	0.301972	0.292803	Synpcc7942_2465	0	0	-0.19251	-0.275991	0	0.73064	0.775123
107	2554781	2555108	2554948	8.76337e-245	6.11121	5.43868	6.18753	4.88988	6.31184	6.2767	0	-0.168202	0.0179068	0	0.368263	0.360209	Synpcc7942_2473	0	0	-0.467904	-0.197216	0	0.0342599	-0.188763
108	2568147	2568689	2568530	9.81086e-145	4.2624	2.79876	3.25538	3.34835	5.46674	5.27506	0	-0.606878	-0.388841	0	0.707229	0.655736	Synpcc7942_2486	Dusk	0	-0.722277	-0.997159	0	2.24211	1.72365
108	2568147	2568689	2568530	9.81086e-145	4.2624	2.79876	3.25538	3.34835	5.46674	5.27506	0	-0.606878	-0.388841	0	0.707229	0.655736	Synpcc7942_2487	Dusk	0	-0.586559	-0.293698	0	0.0971547	-0.00489843
109	2604948	2605368	2605097	0	5.37429	3.02596	4.29099	4.70974	7.20297	6.26355	0	-0.828682	-0.324764	0	0.612944	0.411334	Synpcc7942_2524	0	0	0.856491	1.0065	0	-1.34783	-0.856818
110	2607364	2607654	2607497	2.22805e-111	4.43876	4.06399	3.78786	4.95354	5.12566	6.00667	0	-0.127261	-0.228774	0	0.0492765	0.278104	Synpcc7942_2526	0	0	0.00333646	-0.195277	0	0.152811	0.381298
111	2636260	2636562	2636399	9.13258e-164	4.66519	3.26864	3.11187	4.89232	5.87597	6.29568	0	-0.513246	-0.584154	0	0.264309	0.363844	Synpcc7942_2557	Dusk	0	-1.07632	-1.50229	0	0.668602	1.70814
112	2673886	2674317	2674078	0	5.6474	1.07688	1.50071	2.24013	8.47193	20.436	0	-2.39073	-1.91194	0	1.91911	3.18946	Synpcc7942_2590	Dusk	0	-2.98875	-3.19492	0	4.14865	5.83234
113	2683719	2684392	2683961	3.19788e-282	2.11032	1.53834	2.4925	2.74112	5.11129	3.67597	0	-0.456094	0.240129	0	0.89892	0.423359	Synpcc7942_2601	0	0	-2.13337	-0.687829	0	2.49375	2.05632
113	2683719	2684392	2683961	3.19788e-282	2.11032	1.53834	2.4925	2.74112	5.11129	3.67597	0	-0.456094	0.240129	0	0.89892	0.423359	Synpcc7942_2602	Dusk	0	-1.30345	-0.735701	0	2.44624	2.0192
114	2687881	2688959	2688123	0	5.03436	3.37463	3.80247	4.56083	4.71314	4.48383	0	-0.57708	-0.404872	0	0.0473922	-0.024565	Synpcc7942_2605	0	0	-0.746124	-1.14094	0	1.25022	0.925225

## Sheet: Legend
Column	Name	Description
A	RpaA peak #	Peak number in list of filtered peaks (see Materials and Methods for details). Some peaks have multiple gene targets and are thus listed multiple times for each separate gene target.
B	Start	First chromosomal location of peak
Column	End	Last chromosomal location of peak
D	Peak max location	Chromosomal location of highest normalized read count detected within peak in replicate experiment
E	Q-value	Minimum Q-value of peak in the respective replicate determined by the PeakSeq algorithm (Rozowsky et al 2009)
F-K	Enrichment over mock at peak max location	ChIP-seq data was normalized to the Mock pulldown using PeakSeq (Rozowsky et al 2009). Then, the ratio of the normalized read counts between the sample and the Mock was calculated at the peak max location
L-Q	Log2 normalized change in enrichment from original condition	The enrichment of the peak at each timepoint was divided by the enrichment at time 0 (8 hours since dawn in Low Light for High Light pulse, 8 hours since dawn in Clear Day for Shade pulse) and the Log2 of this ratio was taken.
R	Gene target of peak	Gene target of the peak (See Materials and Methods for details).
S	High confidence class of gene target	High confidence circadian class of gene target (See Materials and Methods and Figure 2 - source data for details). Options are Dusk, Dawn, or 0 if gene is not circadian.
T-Y	Log2 normalized change in gene target expression from original condition	The expression of the gene target of the peak at each timepoint in the respective replicate was divided by the expression at time 0 (8 hours since dawn in Low Light for High Light pulse, 8 hours since dawn in Clear Day for Shade pulse) and the Log2 of this ratio was taken.
