# Supplementary material for: Natural changes in light interact with circadian regulation at promoters to control gene expression in cyanobacteria
Source: eLife journal article supplement (doi:10.7554/elife.32032), 2017-12-14
Supplement: supp [file elife-32032-supp-v2.zip › elife_poa_e32032_Figure_5_source_data_1.xlsx]

## Sheet: Sheet1
Percent phosphorylated RpaB
	Hours since dawn	0.5	2	4	6	8	9	10	11	12
Low Light	Replicate 1	35.2765	39.6651	36.3265	37.1632	42.9215	33.159	32.7809	34.2419	33.5649
	Replicate 2	27.7754	34.6924	34.7695	33.0316	35.7039	31.1491	30.9814	33.2942	33.1797
	Average	31.526	37.1788	35.548	35.0974	39.3127	32.154	31.8812	33.768	33.3723
	Range	7.5011	4.97271	1.55695	4.1316	7.21755	2.00984	1.79945	0.947734	0.385156
Clear Day	Replicate 1	19.6969	18.9128	18.0932	19.6571	28.561	25.0073	23.4721	36.3051	44.7946
	Replicate 2	17.7414	19.8078	18.9461	20.7391	23.4412	23.943	28.5871	34.5861	45.4806
	Average	18.7191	19.3603	18.5196	20.1981	26.0011	24.4751	26.0296	35.4456	45.1376
	Range	1.95553	0.895031	0.852985	1.08198	5.11986	1.06433	5.11495	1.71899	0.685925
		Minutes in pulse				Minutes since return to original condition
		0	15	30	60	15	30	60
	Hours since dawn	8	8.25	8.5	9	9.25	9.5	10
High Light pulse	Replicate 1	33.8262	10.5679	17.6918	20.9148	60.8438	51.4909	36.3417
	Replicate 2	39.5344	13.3118	17.4063	21.411	66.0938	55.7412	39.5374
	Average	36.6803	11.9399	17.5491	21.1629	63.4688	53.6161	37.9396
	Range	5.70813	2.74394	0.285437	0.496194	5.24998	4.25024	3.19569
Shade pulse	Replicate 1	29.6848	51.9356	52.196	45.3535	16.7411	19.7799	14.2096
	Replicate 2	28.1093	56.1161	54.0652	51.5009	20.1012	22.9969	14.5019
	Average	28.897	54.0258	53.1306	48.4272	18.4211	21.3884	14.3558
	Range	1.57542	4.18049	1.86923	6.14741	3.3601	3.21704	0.292274
