# Supplementary material for: Natural changes in light interact with circadian regulation at promoters to control gene expression in cyanobacteria
Source: eLife journal article supplement (doi:10.7554/elife.32032), 2017-12-14
Supplement: supp [file elife-32032-supp-v2.zip › elife_poa_e32032_Figure_5_source_data_2.xlsx]

## Sheet: Replicate 2
					Enrichment over mock at peak max location						Log2 normalized change in enrichment from original condition								Log2 normalized change in gene target expression from original condition
					Minutes in High Light pulse			Minutes in Shade pulse			Minutes in High Light pulse			Minutes in Shade pulse					Minutes in High Light pulse			Minutes in Shade pulse
					0	15	60	0	15	60	0	15	60	0	15	60			0	15	60	0	15	60
					Hours since dawn						Hours since dawn								Hours since dawn
RpaB Peak #	Start	End	Peak max location	Q-value	8	8.25	9	8	8.25	9	8	8.25	9	8	8.25	9	Gene target of peak	High confidence class of gene target	8	8.25	9	8	8.25	9
1	36234	36550	36333	0	5.25102	3.6102	4.15072	3.91626	4.64726	5.65302	0	-0.540519	-0.339238	0	0.246903	0.529545		0	0	0	0	0	0	0
2	46568	46883	46759	1.03e-320	3.14869	1.58015	2.18631	3.73433	3.16465	3.69803	0	-0.994689	-0.526254	0	-0.238801	-0.0140892		0	0	0	0	0	0	0
3	50838	52312	51429	0	9.2094	6.177	7.46498	8.39645	11.6028	11.3021	0	-0.5762	-0.302968	0	0.466619	0.428746		0	0	0	0	0	0	0
4	52350	53997	53777	0	3.91323	4.88787	4.51478	6.65732	6.35033	6.01264	0	0.320846	0.206297	0	-0.0681083	-0.146942		0	0	0	0	0	0	0
5	54874	56127	55267	0	7.88617	6.91053	9.13561	10.4906	11.6937	11.6142	0	-0.19053	0.212175	0	0.156624	0.146784	Synpcc7942_0052	0	0	-0.400586	-0.393555	0	0.815191	0.414723
6	63177	63707	63331	0	7.04062	6.00203	8.04082	7.83044	7.03433	7.6204	0	-0.230252	0.191639	0	-0.154681	-0.0392268		0	0	0	0	0	0	0
7	87285	87667	87444	0	4.60558	1.35192	1.28057	2.72847	7.83887	7.21339	0	-1.76837	-1.8466	0	1.52255	1.40259		0	0	0	0	0	0	0
8	90192	90556	90414	0	4.27892	6.6305	5.15229	5.39365	5.58701	4.94462	0	0.631871	0.267967	0	0.0508156	-0.125401	Synpcc7942_0091	0	0	1.7711	0.617359	0	-0.610748	-0.0114059
9	94196	94483	94336	0	3.23166	3.28569	2.00592	5.16309	5.63288	4.81609	0	0.023925	-0.688009	0	0.125637	-0.100373	Synpcc7942_0096	Dusk	0	-2.96587	-1.78387	0	2.21378	2.3517
10	101019	101311	101135	0	5.69878	2.65882	4.42868	3.34196	5.28228	6.81642	0	-1.09987	-0.363775	0	0.660468	1.02832	Synpcc7942_0100	Dusk	0	-3.06446	-3.39703	0	2.02502	3.88725
10	101019	101311	101135	0	5.69878	2.65882	4.42868	3.34196	5.28228	6.81642	0	-1.09987	-0.363775	0	0.660468	1.02832	Synpcc7942_0101	Dawn	0	0.646442	0.118406	0	-0.266018	-0.0660306
11	103995	104308	104173	0	6.3772	2.82627	2.54692	1.60556	2.72452	4.46127	0	-1.17402	-1.32417	0	0.762927	1.47438		0	0	0	0	0	0	0
12	114084	114347	114194	3.35762e-168	4.27194	3.14541	3.88076	2.1587	2.81669	3.29443	0	-0.441642	-0.138553	0	0.383838	0.609867		0	0	0	0	0	0	0
13	119090	119498	119290	0	11.3933	1.11704	3.05166	2.86194	9.08152	10.1832	0	-3.35043	-1.90052	0	1.66594	1.83113		0	0	0	0	0	0	0
14	129443	130091	129608	0	7.66429	8.22479	8.57329	10.8732	10.01	10.3974	0	0.101827	0.161697	0	-0.11933	-0.0645481	Synpcc7942_0130	0	0	-1.20401	-1.03565	0	1.25532	0.960792
15	152167	152898	152247	0	4.47011	2.99101	2.6986	2.19108	4.08095	4.91058	0	-0.579679	-0.7281	0	0.897263	1.16425		0	0	0	0	0	0	0
16	159444	159870	159781	1.87641e-281	4.3578	2.12287	2.29392	1.54751	3.24261	2.15927	0	-1.03759	-0.925785	0	1.06721	0.480595	Synpcc7942_0157	0	0	-1.41643	-1.41197	0	1.55366	1.18944
17	176502	177772	177568	0	6.5227	4.7557	5.57177	6.33422	6.60862	7.62745	0	-0.455812	-0.227334	0	0.0611821	0.268033		0	0	0	0	0	0	0
18	179753	180373	179937	0	5.8276	4.18745	5.3028	5.36147	7.7718	7.03695	0	-0.476829	-0.13615	0	0.53562	0.392322	Synpcc7942_0181	0	0	-0.710129	-0.805943	0	1.78603	1.89212
19	198781	199090	198947	0	5.47155	4.9191	3.11078	6.01934	3.98972	2.77806	0	-0.153554	-0.814671	0	-0.593317	-1.11553	Synpcc7942_0197	0	0	2.62326	1.27585	0	-1.01091	-0.781978
20	217648	218099	217851	8.55277e-205	2.80028	0.193734	1.28983	2.80821	2.99696	3.51448	0	-3.85342	-1.11839	0	0.0938485	0.323657	Synpcc7942_0215	Dusk	0	-3.6805	-2.32503	0	2.72454	2.77374
21	218907	219278	219104	0	5.49343	6.93755	8.37521	4.35205	6.19548	4.19198	0	0.336721	0.60842	0	0.509522	-0.0540614	Synpcc7942_0217	0	0	2.45261	1.06264	0	-0.717796	-1.02106
22	231545	232168	231925	0	4.64733	4.47919	3.56923	1.47453	5.53075	4.63026	0	-0.0531659	-0.380793	0	1.90722	1.65084	Synpcc7942_0236	Dusk	0	-2.9702	-2.58317	0	2.42444	2.08211
23	235257	235566	235400	0	6.27418	3.77744	2.60672	2.40959	5.20192	2.58091	0	-0.732019	-1.26719	0	1.11026	0.0990917	Synpcc7942_0240	Dusk	0	-1.84476	-0.604845	0	0.440108	-0.38854
24	238269	238890	238559	0	5.44351	4.9354	3.80074	4.39711	4.25509	5.66949	0	-0.14137	-0.518259	0	-0.0473642	0.366664	Synpcc7942_0243	Dusk	0	4.14025	0.992273	0	0.896476	1.16134
25	255207	255597	255427	0	13.6281	12.4607	12.6274	14.1448	9.65877	10.4425	0	-0.129202	-0.110025	0	-0.550356	-0.437803	Synpcc7942_0259	Dawn	0	-1.53941	-0.0682658	0	-0.915181	-1.71446
26	263170	263590	263365	0	3.33081	1.91385	1.47273	1.35998	4.67696	6.70972	0	-0.799394	-1.17738	0	1.78199	2.30267	Synpcc7942_0267	Dusk	0	-2.52876	-2.20207	0	3.30106	3.5027
27	269769	270411	269998	0	3.4317	2.99071	3.58338	3.32357	4.33388	4.74915	0	-0.198435	0.0623972	0	0.382922	0.514935		0	0	0	0	0	0	0
28	294645	295009	294810	0	9.47191	9.50943	6.34979	7.65386	3.65503	6.55572	0	0.0057038	-0.576946	0	-1.0663	-0.223433	Synpcc7942_0297	0	0	1.39848	0.274383	0	-0.252408	-0.164227
29	309024	309398	309327	1.74213e-183	2.7791	2.76766	2.24082	2.86877	2.52222	3.94604	0	-0.00595369	-0.310592	0	-0.185737	0.459973	Synpcc7942_0309	Dusk	0	-1.18352	-1.3025	0	1.47161	1.3768
30	318503	318844	318723	0	3.67175	2.69088	2.8544	2.83455	7.32293	3.14403	0	-0.448388	-0.363282	0	1.3693	0.149495	Synpcc7942_0321	0	0	-0.751634	-1.05842	0	0.984173	1.05081
31	323465	323828	323672	0	4.94573	3.7084	3.9873	3.63274	4.9668	4.03077	0	-0.415386	-0.310774	0	0.45126	0.149999	Synpcc7942_0327	0	0	-2.02077	-0.83942	0	0.230674	-0.694578
32	325862	326251	326082	0	6.37983	3.96689	3.37172	3.64767	3.71568	4.07661	0	-0.685508	-0.920035	0	0.026653	0.160395	Synpcc7942_0328	0	0	-2.52943	-1.00185	0	0.200384	-0.374294
33	346280	346615	346490	0	3.75379	2.92535	3.857	4.1744	6.80833	6.19222	0	-0.359735	0.0391319	0	0.705731	0.568887		0	0	0	0	0	0	0
34	355666	356002	355852	0	7.85005	4.88431	4.89681	3.7306	4.89236	2.91393	0	-0.684547	-0.68086	0	0.391124	-0.35644	Synpcc7942_0364	0	0	3.04333	1.62813	0	-1.29914	-1.46661
35	368246	368571	368412	6.15226e-231	2.60162	2.74487	3.01395	3.65821	2.70304	2.61987	0	0.0773285	0.212249	0	-0.436555	-0.481641		0	0	0	0	0	0	0
36	371980	372458	372280	6.45976e-256	2.33804	0.950705	2.22198	1.0736	2.48518	3.71743	0	-1.29823	-0.0734567	0	1.21089	1.79185	Synpcc7942_0377	Dusk	0	-1.73348	-1.76988	0	1.40414	1.51886
36	371980	372458	372280	6.45976e-256	2.33804	0.950705	2.22198	1.0736	2.48518	3.71743	0	-1.29823	-0.0734567	0	1.21089	1.79185	Synpcc7942_0378	Dusk	0	-0.562694	-0.884742	0	0.196247	0.881921
37	378449	378755	378607	0	2.58441	1.51416	1.47217	2.18391	3.71954	2.27148	0	-0.77131	-0.811885	0	0.768212	0.0567199		0	0	0	0	0	0	0
38	392782	393090	392902	0	8.10963	6.2572	3.98839	4.28671	5.82771	5.56465	0	-0.37412	-1.02383	0	0.443058	0.376421	Synpcc7942_0398	0	0	1.35582	1.01078	0	-0.408923	-0.974051
39	401393	402021	401744	0	4.79341	4.01389	3.66877	4.34156	4.23821	4.07881	0	-0.256054	-0.385756	0	-0.0347612	-0.0900683		0	0	0	0	0	0	0
40	406114	406669	406343	0	6.10349	2.66133	3.29932	4.7792	10.7049	9.11067	0	-1.19749	-0.887468	0	1.16344	0.930789	Synpcc7942_0415	0	0	-3.64513	-1.89382	0	2.54487	1.79298
40	406114	406669	406343	0	6.10349	2.66133	3.29932	4.7792	10.7049	9.11067	0	-1.19749	-0.887468	0	1.16344	0.930789	Synpcc7942_0416	0	0	-3.50616	-2.94661	0	2.34818	2.05289
41	413481	414052	413697	0	10.8249	7.51579	7.09518	8.46939	10.4586	10.4465	0	-0.526358	-0.609444	0	0.304362	0.302688	Synpcc7942_0423	Dusk	0	-1.42062	-1.34165	0	1.64887	2.06014
41	413481	414052	413697	0	10.8249	7.51579	7.09518	8.46939	10.4586	10.4465	0	-0.526358	-0.609444	0	0.304362	0.302688	Synpcc7942_0424	0	0	-2.1258	-1.06271	0	0.685437	0.127232
42	441681	442094	441884	0	13.6614	3.59994	6.24367	8.70771	12.0209	8.22297	0	-1.92406	-1.12964	0	0.465184	-0.0826326	Synpcc7942_0452	0	0	-1.60093	-1.13764	0	1.25737	0.791798
43	456593	457162	456801	0	4.98281	3.74243	3.13257	5.13285	4.28641	5.94751	0	-0.412983	-0.669613	0	-0.259988	0.212528	Synpcc7942_0469	Dawn	0	-0.179918	0.190608	0	0.187831	-0.315693
43	456593	457162	456801	0	4.98281	3.74243	3.13257	5.13285	4.28641	5.94751	0	-0.412983	-0.669613	0	-0.259988	0.212528	Synpcc7942_0470	0	0	-1.63215	-1.90607	0	0.650248	0.652962
44	478369	478954	478599	0	4.42925	3.07405	4.17336	3.42985	4.85843	5.39817	0	-0.526922	-0.0858528	0	0.502343	0.654323		0	0	0	0	0	0	0
45	478995	479617	479355	0	3.46754	1.56715	1.45281	1.36114	4.72464	4.01937	0	-1.14577	-1.25507	0	1.79539	1.56216	Synpcc7942_0491	Dusk	0	-1.58386	-0.545646	0	1.85618	1.82043
46	480691	480975	480829	0	4.02511	3.60024	3.34739	2.7031	4.32811	3.5137	0	-0.160935	-0.265989	0	0.679122	0.378376		0	0	0	0	0	0	0
47	514124	514405	514330	4.39977e-101	2.60335	4.11458	1.97105	1.91155	0.57478	1.72202	0	0.660376	-0.40141	0	-1.73367	-0.15064		0	0	0	0	0	0	0
48	533057	533733	533467	0	11.2586	4.52724	6.85931	7.07057	6.69039	5.18276	0	-1.31433	-0.714895	0	-0.0797378	-0.448106	Synpcc7942_0551	Dusk	0	-2.99864	-2.37359	0	1.50189	1.18244
49	556873	557367	557123	0	7.6778	10.263	8.9371	9.26754	6.59094	7.59795	0	0.41869	0.219114	0	-0.491703	-0.286577	Synpcc7942_0575	0	0	-0.769637	-0.44646	0	0.176343	0.0548596
50	577871	578741	578115	0	9.94259	3.92886	8.57148	6.80766	7.79263	5.29291	0	-1.33951	-0.214077	0	0.19495	-0.363099	Synpcc7942_0588	0	0	-0.132657	1.18459	0	-1.37475	-1.5042
51	583309	583720	583489	0	4.31034	2.95009	2.53661	5.50125	4.53187	5.37341	0	-0.547043	-0.764901	0	-0.279653	-0.0339216	Synpcc7942_0595	Dusk	0	-1.06276	-1.17768	0	0.741235	0.427298
52	666616	667104	666835	0	10.0543	5.22374	3.10921	7.34369	5.79579	5.59699	0	-0.94466	-1.69319	0	-0.341501	-0.391855	Synpcc7942_0672	Dusk	0	3.98765	2.16665	0	-0.825147	-1.79517
53	668853	669360	669162	0	3.87889	1.97977	2.86193	4.39891	5.76066	4.72371	0	-0.97031	-0.438658	0	0.389087	0.102773	Synpcc7942_0674	Dawn	0	-1.686	-0.306774	0	1.01433	-0.256919
54	672566	672961	672819	0	9.13334	6.80299	4.83079	9.56074	5.20595	5.72675	0	-0.424972	-0.918883	0	-0.87696	-0.739405	Synpcc7942_0677	Dusk	0	-1.33188	-1.53233	0	1.28424	2.14795
55	690759	691177	690946	0	4.08159	2.13978	3.3276	2.92495	4.85596	4.22002	0	-0.931669	-0.294652	0	0.731342	0.528836	Synpcc7942_0697	Dawn	0	-0.659925	0.263301	0	0.209874	-0.590264
55	690759	691177	690946	0	4.08159	2.13978	3.3276	2.92495	4.85596	4.22002	0	-0.931669	-0.294652	0	0.731342	0.528836	Synpcc7942_0698	0	0	1.8059	1.25109	0	-0.130441	-0.378146
56	692623	692982	692806	0	5.881	2.79357	1.68391	3.54035	6.99438	4.41319	0	-1.07395	-1.80425	0	0.982305	0.317929	Synpcc7942_0700	0	0	-1.57701	-1.14787	0	1.57119	1.20135
57	749044	749382	749191	0	5.46235	1.79043	3.48373	3.66086	3.7367	2.41215	0	-1.60921	-0.648888	0	0.0295824	-0.601861		0	0	0	0	0	0	0
58	752122	753835	752441	0	6.31646	4.5576	4.5118	6.15167	9.89514	9.95381	0	-0.470842	-0.485414	0	0.685743	0.694271	Synpcc7942_0759	0	0	-0.650502	-0.980615	0	1.11834	1.39982
59	754311	754849	754586	0	3.50402	4.05181	3.6574	4.50951	4.53641	5.7236	0	0.209555	0.061809	0	0.00858059	0.343951		0	0	0	0	0	0	0
60	760051	760433	760195	0	3.07465	1.42481	1.24072	1.46859	3.39927	5.37784	0	-1.10965	-1.30924	0	1.21079	1.8726	Synpcc7942_0768	Dusk	0	-3.36853	-3.08527	0	2.92485	3.93452
61	791701	792143	791932	0	5.41643	4.52574	5.25314	5.59115	4.46197	3.82511	0	-0.259187	-0.0441613	0	-0.325462	-0.547644	Synpcc7942_0797	Dusk	0	-2.20508	-2.13677	0	0.845978	0.484529
62	829288	829647	829458	0	4.54023	0.367693	1.03369	0.692091	11.0285	12.3202	0	-3.62619	-2.13496	0	3.99412	4.15392		0	0	0	0	0	0	0
63	830696	831060	830805	0	5.67599	1.84721	1.91544	2.9985	4.1813	5.51408	0	-1.61952	-1.5672	0	0.479709	0.878878		0	0	0	0	0	0	0
64	846322	846584	846413	9.72682e-187	2.74887	1.17075	0.780702	0.96877	2.64951	3.69788	0	-1.23141	-1.816	0	1.4515	1.93247		0	0	0	0	0	0	0
65	846908	847353	847068	0	10.2225	12.5464	8.86981	10.1675	7.57671	9.59211	0	0.295523	-0.204778	0	-0.424327	-0.0840515	Synpcc7942_0850	Dawn	0	0.302738	0.827168	0	-0.106912	-1.39065
66	853117	854522	853466	0	5.92094	4.66977	5.22878	6.5343	8.76338	5.40041	0	-0.342475	-0.179351	0	0.423454	-0.274965	Synpcc7942_0855	Dawn	0	-0.529414	-0.373983	0	2.25554	0.447851
67	862242	862894	862355	0	4.41096	3.33491	2.87335	2.16486	4.25992	3.41097	0	-0.403448	-0.618362	0	0.976555	0.65591		0	0	0	0	0	0	0
68	863732	864454	864277	0	4.55302	2.60514	3.86147	2.12467	4.1893	3.501	0	-0.805465	-0.237676	0	0.979469	0.720528		0	0	0	0	0	0	0
69	871766	872482	872227	0	6.92976	4.09158	3.59533	5.11071	5.68325	5.35901	0	-0.760147	-0.946683	0	0.153191	0.0684426	Synpcc7942_0870	0	0	0.00413475	-0.337126	0	0.478664	0.644524
70	888900	889465	889195	0	26.7148	19.2234	14.9698	14.86	16.721	11.9904	0	-0.474776	-0.835588	0	0.170228	-0.309558	Synpcc7942_0882	0	0	1.67497	1.65142	0	-1.34294	-0.835084
71	892866	893310	893075	0	15.0025	10.9081	8.94754	10.1228	9.0987	7.84966	0	-0.459806	-0.745637	0	-0.153874	-0.366904	Synpcc7942_0885	0	0	1.40414	1.8148	0	-0.812706	-1.58636
72	901499	901962	901657	0	4.27933	2.69905	3.70693	3.12473	4.51166	3.53445	0	-0.664936	-0.207162	0	0.529925	0.177754	Synpcc7942_0891	0	0	-0.126835	-1.15877	0	0.325482	-0.358238
73	902753	903303	903089	0	3.62408	5.39499	3.39699	4.22068	3.07175	3.75888	0	0.574006	-0.0933574	0	-0.458414	-0.167173		0	0	0	0	0	0	0
74	909592	909879	909759	7.22733135000000e-316	6.2032	2.87469	3.0937	3.85912	4.54403	3.19516	0	-1.10961	-1.00368	0	0.235703	-0.272383	Synpcc7942_0900	0	0	-2.5071	-0.493047	0	3.9314	3.01325
75	915280	915732	915416	0	9.95678	5.57633	6.37237	4.88088	7.32538	6.42778	0	-0.836364	-0.643849	0	0.585764	0.39718	Synpcc7942_0905	Dusk	0	-2.16479	-1.61169	0	3.46348	2.85686
76	916026	917387	916294	0	3.99831	3.77893	3.42933	4.29763	5.06495	4.03426	0	-0.0814118	-0.221462	0	0.237007	-0.0912368		0	0	0	0	0	0	0
77	926904	927210	927067	1.67938e-135	3.68679	1.0905	1.89136	1.83936	3.35758	2.96432	0	-1.75738	-0.962945	0	0.868218	0.688496	Synpcc7942_0920	Dawn	0	-2.61839	-1.8404	0	0.374335	-0.770868
78	949733	950332	949964	0	7.29873	7.24053	4.28642	6.22219	7.15345	5.94586	0	-0.0115502	-0.767871	0	0.201215	-0.0655379	Synpcc7942_0942	0	0	1.2374	0.0990983	0	0.516437	0.653564
78	949733	950332	949964	0	7.29873	7.24053	4.28642	6.22219	7.15345	5.94586	0	-0.0115502	-0.767871	0	0.201215	-0.0655379	Synpcc7942_0943	0	0	-0.1305	0.602968	0	0.170746	-0.275371
79	976121	976502	976255	0	6.90655	5.9657	5.9847	6.08086	6.09523	5.16405	0	-0.211272	-0.206685	0	0.00340606	-0.235772		0	0	0	0	0	0	0
80	994905	995190	995093	0	8.43582	2.10426	2.34489	3.81214	5.65496	3.60871	0	-2.00321	-1.84701	0	0.568916	-0.079118		0	0	0	0	0	0	0
81	997817	998516	998138	5.24254e-161	2.50675	3.16862	2.36202	3.77998	2.01264	3.23535	0	0.33804	-0.0857978	0	-0.90929	-0.224457	Synpcc7942_0989	Dusk	0	-1.14158	-1.79093	0	1.78722	2.43475
82	1013673	1014000	1013849	3.41128e-253	3.60535	0.873379	1.89181	1.98399	3.19375	3.32389	0	-2.04546	-0.930374	0	0.686847	0.74447	Synpcc7942_1002	0	0	-3.58648	-1.72326	0	0.9137	0.349799
83	1019025	1019906	1019313	0	7.03257	2.928	2.94078	2.48459	4.41102	2.49028	0	-1.26414	-1.25785	0	0.828106	0.00330455		0	0	0	0	0	0	0
84	1020264	1020689	1020544	2.46493613132160e-311	3.28659	4.28455	2.8551	2.56521	1.95036	2.84221	0	0.382551	-0.203051	0	-0.395338	0.147936		0	0	0	0	0	0	0
85	1039601	1040067	1039952	0	3.95604	3.99889	3.20699	2.79938	3.98379	4.6199	0	0.0155408	-0.302841	0	0.509034	0.722756		0	0	0	0	0	0	0
86	1043266	1043716	1043451	0	8.17686	6.98371	6.14017	9.82542	10.7254	8.6736	0	-0.227554	-0.41327	0	0.126442	-0.179888	Synpcc7942_1029	0	0	0.376183	0.656903	0	-0.365258	-1.11316
87	1055456	1055782	1055583	0	10.0854	3.94717	4.99135	3.03518	7.56467	9.40766	0	-1.35338	-1.01477	0	1.3175	1.63205	Synpcc7942_1042	Dusk	0	-3.90938	-3.27866	0	1.47177	1.06314
88	1059641	1060338	1059889	0	15.9188	13.3387	10.6095	14.6605	12.6522	10.3781	0	-0.25511	-0.585374	0	-0.212539	-0.498393	Synpcc7942_1047	0	0	-3.04002	-1.80926	0	0.596519	-0.570541
89	1074721	1075444	1075073	0	6.21357	5.90543	5.68178	7.00473	7.08781	7.34161	0	-0.0733791	-0.129079	0	0.017009	0.0677659		0	0	0	0	0	0	0
90	1108175	1108553	1108308	0	18.823	10.6878	6.78394	12.0917	10.7142	6.05819	0	-0.81653	-1.4723	0	-0.174488	-0.997059	Synpcc7942_1090	0	0	1.56817	0.655273	0	-0.92494	-1.07184
91	1109349	1110095	1109509	0	14.5124	7.40737	6.0107	9.07188	11.7639	8.79693	0	-0.970254	-1.27168	0	0.374896	-0.0444018		0	0	0	0	0	0	0
92	1134237	1134608	1134326	0	3.67961	5.32464	5.60989	6.38602	5.30016	4.96826	0	0.533132	0.608422	0	-0.268882	-0.362176	Synpcc7942_1117	0	0	0.0169748	-0.0153712	0	-0.485196	-0.828327
93	1136547	1136848	1136683	0	3.88865	3.84769	3.19653	4.1406	6.63847	3.70206	0	-0.0152761	-0.28276	0	0.681009	-0.161513		0	0	0	0	0	0	0
94	1137851	1138335	1138020	0	12.0197	8.91188	10.0486	10.2294	9.96037	11.692	0	-0.431595	-0.258401	0	-0.0384435	0.192802	Synpcc7942_1120	0	0	6.08011	1.30001	0	-0.203307	-2.28881
95	1155416	1157406	1155947	0	11.3184	8.42417	7.83631	9.93068	15.3468	15.8349	0	-0.426066	-0.530427	0	0.627968	0.673139		0	0	0	0	0	0	0
96	1172465	1172823	1172645	0	4.14809	3.27774	3.61337	3.91388	4.34331	6.06897	0	-0.339745	-0.199101	0	0.150198	0.632853	Synpcc7942_1148	0	0	-1.87785	-2.15878	0	1.9738	3.22467
97	1178715	1179275	1178988	0	15.2877	15.8608	13.8846	12.2815	8.62533	10.5251	0	0.0530951	-0.138891	0	-0.50984	-0.222652	Synpcc7942_1152	0	0	0.0706974	-0.208677	0	0.204092	0.182671
98	1189985	1190888	1190491	0	6.88172	6.50668	6.26431	8.00515	7.63952	7.72736	0	-0.0808477	-0.135614	0	-0.0674461	-0.0509515		0	0	0	0	0	0	0
99	1190967	1191671	1191521	0	7.26279	6.45718	5.22083	4.61689	4.5821	6.48263	0	-0.16962	-0.476245	0	-0.0109146	0.489658		0	0	0	0	0	0	0
100	1192456	1192736	1192590	0	2.2985	1.63481	1.06974	2.37744	4.73829	3.42885	0	-0.491571	-1.10343	0	0.99496	0.528316		0	0	0	0	0	0	0
101	1236750	1237287	1237030	0	11.7801	13.4416	12.5658	11.2797	9.62378	7.82664	0	0.190349	0.0931454	0	-0.229049	-0.527261		0	0	0	0	0	0	0
102	1246001	1246334	1246155	0	6.9375	3.95467	3.93329	4.66663	3.93945	3.84206	0	-0.810858	-0.81868	0	-0.244389	-0.280501	Synpcc7942_1224	0	0	1.37355	0.393588	0	-0.428572	-0.906175
103	1253373	1254821	1253579	0	10.1952	9.30878	11.2428	10.3599	8.20289	8.1992	0	-0.131228	0.141103	0	-0.336809	-0.337459	Synpcc7942_1232	Dawn	0	0.325884	1.04954	0	-1.12213	-2.01503
104	1254041	1254843	1254245	0	3.89796	2.62118	3.47212	3.05937	3.53978	4.37582	0	-0.572502	-0.166904	0	0.210422	0.516317		0	0	0	0	0	0	0
105	1253995	1254830	1254558	0	3.39654	3.04131	2.01082	2.37128	3.8812	2.41157	0	-0.159375	-0.756286	0	0.710835	0.0243074		0	0	0	0	0	0	0
106	1269355	1269680	1269359	4.33372e-169	2.51093	3.05068	4.5046	3.91975	2.74349	2.56723	0	0.280912	0.843177	0	-0.514747	-0.610546		0	0	0	0	0	0	0
107	1277269	1277561	1277367	0	2.51246	1.25904	0.868118	2.21618	5.51442	3.0577	0	-0.996778	-1.53314	0	1.31513	0.464371	Synpcc7942_1254	Dawn	0	-1.07724	-0.944867	0	1.27926	-0.241515
108	1294873	1295319	1295146	0	13.8898	9.80633	8.31692	9.66892	7.55744	10.7343	0	-0.502237	-0.7399	0	-0.355457	0.150794		0	0	0	0	0	0	0
109	1351338	1351811	1351482	0	6.7201	1.36082	3.04154	3.7744	6.12721	4.9978	0	-2.30401	-1.14368	0	0.698982	0.405044	Synpcc7942_1322	0	0	-4.04932	-1.64431	0	0.760639	0.466283
110	1366942	1367349	1367077	0	9.94859	5.9096	6.08952	8.44621	12.0963	8.93216	0	-0.751431	-0.708164	0	0.518187	0.0807055		0	0	0	0	0	0	0
111	1385190	1385478	1385317	1.64108e-245	5.40034	3.74133	3.8096	3.16599	3.02468	6.15609	0	-0.5295	-0.503413	0	-0.065875	0.959357		0	0	0	0	0	0	0
112	1388760	1390382	1389031	0	7.15008	7.94631	6.7946	6.72789	7.07295	5.89968	0	0.152326	-0.0735704	0	0.0721579	-0.189519		0	0	0	0	0	0	0
113	1396660	1397092	1397026	0	4.26216	4.68998	6.10272	4.70307	4.20798	3.07848	0	0.137995	0.517867	0	-0.160477	-0.611386		0	0	0	0	0	0	0
114	1413979	1414343	1414198	0	3.38793	2.83765	2.09614	3.49995	4.65252	5.23147	0	-0.255707	-0.692668	0	0.410679	0.579883	Synpcc7942_1373	0	0	-1.14026	-0.120806	0	0.971912	-0.0621909
115	1427015	1427690	1427328	0	15.2151	12.281	7.517	7.45711	8.86518	8.43697	0	-0.309073	-1.01727	0	0.249534	0.178109		0	0	0	0	0	0	0
116	1435543	1436158	1435713	0	12.5557	10.6696	9.37687	8.21048	7.83729	7.10093	0	-0.23484	-0.421165	0	-0.0671125	-0.209459		0	0	0	0	0	0	0
117	1440916	1441328	1441086	0	4.21767	3.81393	3.67245	5.2316	4.57169	4.89254	0	-0.145171	-0.199706	0	-0.194525	-0.0966693		0	0	0	0	0	0	0
118	1442010	1442440	1442372	0	4.06274	5.4436	3.71136	5.73713	3.8052	4.18529	0	0.422109	-0.130503	0	-0.592359	-0.455003		0	0	0	0	0	0	0
119	1445949	1446344	1446160	1.66213e-231	2.01236	1.46711	0.51765	0.65724	2.66398	3.51394	0	-0.455905	-1.95884	0	2.01909	2.4186	Synpcc7942_1396	Dusk	0	-1.31866	-1.66162	0	1.39514	1.92631
119	1445949	1446344	1446160	1.66213e-231	2.01236	1.46711	0.51765	0.65724	2.66398	3.51394	0	-0.455905	-1.95884	0	2.01909	2.4186	Synpcc7942_1397	Dusk	0	-3.86153	-3.12365	0	1.92101	1.84677
120	1448820	1449418	1449070	0	9.49322	4.45711	5.88882	4.47238	9.03305	8.14956	0	-1.09079	-0.68892	0	1.01417	0.865678		0	0	0	0	0	0	0
121	1449922	1450363	1450106	0	4.34027	2.55535	3.16679	4.18873	3.4265	4.46947	0	-0.76426	-0.454763	0	-0.289778	0.0935924		0	0	0	0	0	0	0
122	1450364	1451401	1450541	2.23045e-273	2.63069	3.78431	4.23868	0.844381	2.77222	2.10482	0	0.524592	0.688176	0	1.71507	1.31773		0	0	0	0	0	0	0
123	1452345	1452816	1452542	0	3.97492	4.0967	3.46305	2.96718	5.59136	4.95832	0	0.0435362	-0.198882	0	0.914104	0.740756	Synpcc7942_1400	0	0	-0.874717	-0.427068	0	0.780896	1.08332
124	1506109	1506573	1506287	0	5.36166	4.15624	4.47619	3.45332	3.67187	3.5959	0	-0.3674	-0.260406	0	0.088531	0.0583711	Synpcc7942_1453	0	0	-1.31605	0.0928833	0	-1.30683	-1.40299
125	1508259	1508554	1508364	1.23114e-297	6.01849	2.82152	2.60732	2.58845	4.80182	3.15133	0	-1.09293	-1.20683	0	0.891494	0.283874	Synpcc7942_1455	0	0	1.44252	1.40916	0	-1.47321	-1.76729
126	1552948	1553314	1553067	8.63482e-176	3.9559	2.93226	2.09475	2.77173	2.9579	3.22412	0	-0.43199	-0.91723	0	0.0937852	0.218119		0	0	0	0	0	0	0
127	1561244	1561495	1561361	2.07078e-212	3.70366	2.53589	4.21871	2.74837	3.44315	4.74175	0	-0.546463	0.18785	0	0.325154	0.786843	Synpcc7942_1510	0	0	-2.03326	-1.64132	0	2.35316	1.72715
128	1563284	1563571	1563437	0	5.87581	3.70358	5.44472	4.93629	7.70692	6.10016	0	-0.665866	-0.109929	0	0.642728	0.30542	Synpcc7942_1513	Dawn	0	-1.18819	-0.409468	0	-0.221522	-0.698082
129	1597644	1598337	1597843	0	4.176	4.11724	5.29658	5.0796	3.10052	4.88631	0	-0.0204445	0.34294	0	-0.712204	-0.0559703		0	0	0	0	0	0	0
130	1598327	1599491	1598402	0	6.17542	5.53438	7.21461	4.99391	9.33909	10.3389	0	-0.158116	0.224383	0	0.903112	1.04984		0	0	0	0	0	0	0
131	1600286	1600645	1600431	0	15.9274	9.10544	9.30407	15.4164	20.7889	19.7189	0	-0.806707	-0.775575	0	0.431347	0.355109		0	0	0	0	0	0	0
132	1605493	1606116	1605736	0	7.54403	4.58685	5.29337	4.476	6.11981	6.59535	0	-0.717833	-0.51115	0	0.451275	0.559237	Synpcc7942_1548	Dawn	0	-0.576043	-1.32605	0	0.0310679	0.846678
133	1614323	1614979	1614587	0	3.99656	1.91356	1.93685	2.66386	6.73345	5.71527	0	-1.0625	-1.04505	0	1.33783	1.1013	Synpcc7942_1557	Dusk	0	-1.57773	-1.12759	0	1.70072	0.247162
134	1617240	1617782	1617596	0	5.00445	4.42819	5.2051	5.54252	6.50662	5.90857	0	-0.176494	0.0567148	0	0.231367	0.0922671		0	0	0	0	0	0	0
135	1625958	1626264	1626118	0	6.38032	3.80022	2.05044	3.6399	5.73828	3.6622	0	-0.747545	-1.63769	0	0.656718	0.00880964	Synpcc7942_1567	Dusk	0	-3.62483	-2.94276	0	2.5715	2.82417
136	1630613	1631204	1630991	0	5.36741	4.64739	4.6424	3.51228	4.04714	5.82542	0	-0.207805	-0.209355	0	0.204494	0.729953	Synpcc7942_1572	Dusk	0	-1.4311	-2.06407	0	2.01279	3.51375
137	1633197	1633631	1633335	2.19208e-252	2.4338	2.14239	4.3826	3.32871	3.85229	3.62107	0	-0.183992	0.848574	0	0.210755	0.121452		0	0	0	0	0	0	0
138	1653036	1653440	1653272	0	4.36217	3.17027	4.45436	3.7611	5.41104	6.80323	0	-0.460439	0.0301719	0	0.524754	0.855066	Synpcc7942_1587	Dusk	0	-3.0001	-2.30032	0	2.04149	2.046
139	1662579	1662971	1662783	0	3.9412	3.27264	4.1801	2.86491	3.3382	3.31839	0	-0.268181	0.0849022	0	0.220582	0.211993	Synpcc7942_1596	0	0	1.74898	1.01791	0	-1.27242	-0.841903
140	1675229	1675534	1675395	0	7.75062	5.0684	6.33045	9.45234	7.1501	7.28214	0	-0.612781	-0.292003	0	-0.40271	-0.37631	Synpcc7942_1609	Dawn	0	0.101349	-0.0191007	0	-0.145225	-0.514734
141	1706443	1706799	1706579	0	10.2213	9.13371	7.08485	8.52495	9.39107	7.9587	0	-0.1623	-0.528764	0	0.139598	-0.0991583	Synpcc7942_1638	0	0	0.26756	0.539207	0	0.312128	-0.271713
142	1707699	1708024	1707811	0	10.9529	5.30284	8.64783	4.55496	6.63349	7.06772	0	-1.04648	-0.340907	0	0.54233	0.633806		0	0	0	0	0	0	0
143	1714031	1714390	1714215	0	4.29442	3.61233	3.16793	2.98189	5.47236	3.34775	0	-0.249533	-0.438922	0	0.875937	0.166966	Synpcc7942_1646	Dusk	0	-2.45023	-1.76887	0	2.23875	2.27445
144	1729144	1729506	1729277	0	6.39293	3.03165	3.39272	1.61719	4.59174	4.70015	0	-1.07638	-0.914036	0	1.50555	1.53922	Synpcc7942_1659	0	0	0.655235	0.757399	0	-0.153158	-0.384939
145	1792279	1792685	1792465	0	10.4836	7.58815	8.10902	5.90704	7.51745	8.6837	0	-0.46632	-0.370541	0	0.347807	0.555875		0	0	0	0	0	0	0
146	1792761	1793366	1793171	0	2.68452	0.635461	0.800446	1.42408	7.18287	7.54107	0	-2.07879	-1.74579	0	2.33453	2.40474		0	0	0	0	0	0	0
147	1812556	1812930	1812758	0	3.06123	1.69953	2.38858	1.3465	5.34954	4.39863	0	-0.84897	-0.357957	0	1.9902	1.70784	Synpcc7942_1741	Dusk	0	-0.269692	-0.151793	0	-0.110424	-0.439307
147	1812556	1812930	1812758	0	3.06123	1.69953	2.38858	1.3465	5.34954	4.39863	0	-0.84897	-0.357957	0	1.9902	1.70784	Synpcc7942_1742	0	0	0.937956	0.946794	0	-1.63152	-2.15952
148	1826346	1826601	1826442	0	8.47394	2.60595	3.6592	5.63623	6.3271	3.88206	0	-1.70122	-1.2115	0	0.166813	-0.537908	Synpcc7942_1758	Dusk	0	0.235012	0.218601	0	-0.0539492	0.259619
149	1840583	1840956	1840687	6.96108e-273	4.49893	3.04776	2.9496	2.357	3.83546	4.90562	0	-0.561832	-0.609061	0	0.702444	1.05748	Synpcc7942_1776	Dusk	0	-1.99023	-1.76759	0	1.88553	3.18218
150	1843772	1844037	1843904	0	3.36179	3.80884	3.33276	2.91432	5.91092	5.20575	0	0.180121	-0.0125111	0	1.02023	0.83695		0	0	0	0	0	0	0
151	1852179	1852832	1852397	0	7.17669	2.26178	2.58639	2.80326	6.22379	8.53299	0	-1.66586	-1.47238	0	1.15069	1.60594	Synpcc7942_1784	Dusk	0	-5.13615	-3.82674	0	3.30889	4.0535
152	1854822	1855112	1854925	1.61775e-174	5.48938	3.84321	2.28593	3.92413	4.0086	2.73214	0	-0.514333	-1.26386	0	0.030727	-0.522343	Synpcc7942_1787	0	0	0.774517	1.10009	0	-0.0531171	-0.564401
153	1862890	1863418	1863180	0	8.46331	3.57815	4.57805	1.78333	4.32777	5.14165	0	-1.24201	-0.886489	0	1.27905	1.52766	Synpcc7942_1792	0	0	-1.484	-0.236481	0	0.519939	-0.0624104
154	1867371	1868142	1867614	0	4.61374	3.2078	3.05352	2.96998	3.7387	3.06318	0	-0.524352	-0.595463	0	0.332081	0.0445763		0	0	0	0	0	0	0
155	1875999	1876386	1876209	3.13319e-278	6.73278	4.63082	3.36058	2.89992	3.89979	2.79192	0	-0.539934	-1.00249	0	0.427383	-0.0547549		0	0	0	0	0	0	0
156	1880639	1881245	1880797	0	7.60554	6.31276	7.30509	8.05563	8.10241	9.86418	0	-0.268779	-0.0581493	0	0.00835394	0.292202		0	0	0	0	0	0	0
157	1881269	1882159	1881858	0	2.97725	2.43795	3.45911	4.96489	3.44007	4.07024	0	-0.288313	0.216419	0	-0.529325	-0.286649		0	0	0	0	0	0	0
158	1885342	1886380	1885793	0	7.70877	8.20047	7.65776	7.07529	6.33279	6.16118	0	0.0892045	-0.00957846	0	-0.159949	-0.199584		0	0	0	0	0	0	0
159	1885940	1886389	1885793	0	7.70877	8.20047	7.65776	7.07529	6.33279	6.16118	0	0.0892045	-0.00957846	0	-0.159949	-0.199584		0	0	0	0	0	0	0
160	1894035	1894469	1894303	0	5.59272	4.24978	4.64956	3.112	5.74831	4.4964	0	-0.396161	-0.266457	0	0.885296	0.530928		0	0	0	0	0	0	0
161	1898922	1899276	1899028	2.09591e-290	2.78661	2.41368	2.37771	1.83274	3.88142	2.02673	0	-0.207278	-0.228938	0	1.08258	0.145151		0	0	0	0	0	0	0
162	1905816	1906189	1906062	0	3.50854	2.53026	1.08605	0.777922	2.48703	5.88921	0	-0.471589	-1.69178	0	1.67672	2.92038	Synpcc7942_1838	Dusk	0	-3.65379	-3.14286	0	3.47489	4.29554
163	1907319	1907645	1907494	0	6.55	5.00148	4.82185	5.77626	5.34474	5.72457	0	-0.389141	-0.441909	0	-0.112016	-0.0129688	Synpcc7942_1840	0	0	2.55946	1.4788	0	-0.861396	-0.407612
164	1913665	1913989	1913829	3.10918e-144	4.70178	2.65722	1.24462	2.80427	2.85726	3.71926	0	-0.82329	-1.9175	0	0.0270044	0.407389	Synpcc7942_1846	0	0	1.30198	0.406422	0	-0.808511	-0.11612
165	1916218	1916797	1916382	0	6.74673	5.16376	6.01118	4.57698	7.46913	7.58112	0	-0.385767	-0.16654	0	0.706542	0.728014	Synpcc7942_1849	Dusk	0	-3.48164	-3.19331	0	3.361	4.42971
166	1926591	1926986	1926756	0	7.85447	2.46021	4.05873	6.17953	8.90243	4.95872	0	-1.67473	-0.952487	0	0.526702	-0.317528	Synpcc7942_1858	0	0	-2.51403	-0.709483	0	0.331748	-0.628668
167	1936737	1937152	1936878	0	8.03978	7.82992	8.63447	8.95436	8.57264	6.96322	0	-0.0381595	0.102951	0	-0.0628516	-0.362836		0	0	0	0	0	0	0
168	1942780	1943294	1942947	5.91207e-288	4.94985	3.20494	4.7397	3.53094	1.99362	2.10001	0	-0.627088	-0.062589	0	-0.824662	-0.749657	Synpcc7942_1871	Dusk	0	-0.901852	-1.54228	0	0.54617	1.78845
169	1942857	1944280	1944086	0	4.21427	4.931	4.6347	4.73094	4.18748	4.48473	0	0.226598	0.137191	0	-0.176044	-0.0771064		0	0	0	0	0	0	0
170	1989562	1989855	1989648	0	4.30456	1.73832	2.60711	2.41103	4.9251	2.6081	0	-1.30817	-0.723412	0	1.03051	0.113354	Synpcc7942_1912a	0	0	-4.14602	-2.27485	0	1.59738	1.34966
171	2038491	2038804	2038601	7.83407e-98	3.27952	2.23574	3.59472	3.18333	2.38238	4.05098	0	-0.55273	0.132396	0	-0.418132	0.347732		0	0	0	0	0	0	0
172	2052739	2053398	2052925	0	9.23867	7.29807	8.22271	7.58835	5.3686	5.36238	0	-0.34017	-0.16807	0	-0.49924	-0.500913	Synpcc7942_1982	0	0	-0.538495	-0.142394	0	0.109102	-0.380264
172	2052739	2053398	2052925	0	9.23867	7.29807	8.22271	7.58835	5.3686	5.36238	0	-0.34017	-0.16807	0	-0.49924	-0.500913	Synpcc7942_1983	0	0	2.56375	1.72759	0	-2.00022	-2.18076
173	2057523	2058178	2057771	0	10.4329	0.477081	0.906377	2.04785	9.76997	11.3372	0	-4.45076	-3.52488	0	2.25424	2.46888	Synpcc7942_1986	0	0	-1.36187	-1.20439	0	1.015	1.16753
173	2057523	2058178	2057771	0	10.4329	0.477081	0.906377	2.04785	9.76997	11.3372	0	-4.45076	-3.52488	0	2.25424	2.46888	Synpcc7942_1987	Dusk	0	-4.55713	-3.61012	0	2.85709	2.98501
174	2061376	2062020	2061688	0	2.23195	2.80649	2.38458	3.89783	4.44206	3.32363	0	0.330462	0.0954303	0	0.188557	-0.229913		0	0	0	0	0	0	0
175	2066119	2066724	2066440	0	6.78059	8.98875	7.23809	5.16353	5.33376	5.85659	0	0.406711	0.0941987	0	0.0467956	0.181703	Synpcc7942_1997	0	0	5.47442	2.72465	0	-0.681228	-1.3721
176	2079916	2080350	2080170	0	4.73797	2.11487	4.59286	3.95764	3.49605	2.86577	0	-1.1637	-0.0448756	0	-0.178915	-0.465718	Synpcc7942_2010	Dawn	0	-1.75853	-0.0741182	0	0.468018	-0.896898
177	2100170	2100535	2100377	2.98328e-204	4.47483	0.936154	1.54729	2.97414	3.08848	2.53964	0	-2.25701	-1.53209	0	0.0544262	-0.22785	Synpcc7942_2030	0	0	-2.99937	-1.09556	0	0.216222	-0.468096
178	2104721	2104941	2104824	1.17891e-75	3.3085	3.98917	1.28269	0.600142	2.63959	0.587514	0	0.26991	-1.36701	0	2.13694	-0.0306814		0	0	0	0	0	0	0
179	2126115	2126586	2126329	0	3.8264	2.40559	2.14117	3.12898	5.78474	4.22308	0	-0.669597	-0.837592	0	0.88656	0.432605	Synpcc7942_2049	0	0	-1.97739	-1.87941	0	0.705973	0.499537
179	2126115	2126586	2126329	0	3.8264	2.40559	2.14117	3.12898	5.78474	4.22308	0	-0.669597	-0.837592	0	0.88656	0.432605	Synpcc7942_2050	Dawn	0	-0.730628	0.0890286	0	-0.120519	0.302299
180	2148344	2148690	2148444	0	9.12682	2.89773	3.09509	2.95407	4.65045	2.79287	0	-1.65519	-1.56013	0	0.654667	-0.0809537		0	0	0	0	0	0	0
181	2150393	2150768	2150534	0	10.7091	4.81061	3.65468	5.76864	9.58341	9.15471	0	-1.15454	-1.55101	0	0.732309	0.666284		0	0	0	0	0	0	0
182	2167739	2168364	2167952	0	8.3489	8.33402	7.56666	9.00787	6.26053	5.96427	0	-0.00257373	-0.141929	0	-0.524902	-0.594842	Synpcc7942_2088	Dawn	0	3.30911	2.16184	0	-0.660073	-0.879456
183	2198501	2198820	2198601	0	8.2933	5.034	3.82748	2.74365	3.8511	1.6712	0	-0.720241	-1.11555	0	0.489171	-0.715218		0	0	0	0	0	0	0
184	2206891	2207364	2207105	0	25.7842	19.4833	18.4501	21.5732	19.8769	15.5775	0	-0.404249	-0.482854	0	-0.118148	-0.469774	Synpcc7942_2126	0	0	0.174868	0.587753	0	0.927486	0.571262
184	2206891	2207364	2207105	0	25.7842	19.4833	18.4501	21.5732	19.8769	15.5775	0	-0.404249	-0.482854	0	-0.118148	-0.469774	Synpcc7942_2127	Dusk	0	2.20042	-0.892297	0	-0.354333	0.494196
185	2216207	2216658	2216409	0	8.63257	6.89911	6.59998	5.95596	6.10115	6.73965	0	-0.323381	-0.387329	0	0.034747	0.17834	Synpcc7942_2137	Dusk	0	-1.46729	-0.235424	0	0.325591	-0.036445
186	2221081	2221472	2221258	0	3.57376	3.24945	3.11371	4.89963	3.71397	3.96182	0	-0.137248	-0.19881	0	-0.39971	-0.306508		0	0	0	0	0	0	0
187	2222392	2222844	2222486	0	5.23618	5.20736	4.22325	6.19612	6.70056	5.20813	0	-0.00796243	-0.31016	0	0.112916	-0.2506		0	0	0	0	0	0	0
188	2223276	2224360	2223515	0	6.39509	6.93324	7.21538	7.20033	7.07577	8.31759	0	0.116564	0.174111	0	-0.0251756	0.208102		0	0	0	0	0	0	0
189	2234456	2235655	2234675	0	7.21086	7.33192	7.62204	8.59858	8.01179	8.26976	0	0.0240185	0.0800042	0	-0.101972	-0.0562522		0	0	0	0	0	0	0
190	2240745	2241256	2240935	0	13.5775	10.1934	9.1189	10.3608	7.57193	5.02436	0	-0.413577	-0.574281	0	-0.452405	-1.04413	Synpcc7942_2156	Dawn	0	0.273531	0.38211	0	-0.625493	-1.88877
190	2240745	2241256	2240935	0	13.5775	10.1934	9.1189	10.3608	7.57193	5.02436	0	-0.413577	-0.574281	0	-0.452405	-1.04413	Synpcc7942_2158	Dawn	0	-1.99761	-0.684271	0	0.580757	-0.682714
191	2242525	2242779	2242605	6.51992e-117	2.90259	2.02965	3.62275	1.45949	1.37821	2.17547	0	-0.516111	0.319745	0	-0.0826662	0.575865	Synpcc7942_2160	Dawn	0	-0.761922	0.0301684	0	0.285782	-0.722067
192	2245361	2245797	2245575	0	10.2077	7.47201	8.24696	7.62703	6.14164	7.38794	0	-0.45009	-0.307724	0	-0.312497	-0.0459497		0	0	0	0	0	0	0
193	2314949	2315366	2315097	0	3.52149	2.20932	2.04149	1.53152	1.81229	9.21324	0	-0.672582	-0.786563	0	0.242852	2.58874		0	0	0	0	0	0	0
194	2324786	2325180	2324926	0	11.9051	5.3632	4.43997	6.06071	8.9828	8.32269	0	-1.15042	-1.42296	0	0.56768	0.457564	Synpcc7942_2254	Dusk	0	-1.82046	-2.28566	0	1.5013	4.49372
195	2332864	2333277	2333037	0	13.789	8.95468	10.2879	10.5335	10.8065	12.0739	0	-0.622804	-0.422562	0	0.0369209	0.196913	Synpcc7942_2264	0	0	0.25268	-0.151556	0	0.663874	0.48184
196	2333984	2334246	2334144	0	2.6729	2.29077	2.00172	1.80823	4.53756	2.75925	0	-0.222575	-0.417164	0	1.32733	0.609694		0	0	0	0	0	0	0
197	2370528	2370832	2370687	5.12461e-104	2.61039	2.27927	4.16211	1.94753	1.02256	1.12666	0	-0.195695	0.673048	0	-0.929466	-0.789593		0	0	0	0	0	0	0
198	2377559	2377921	2377759	0	13.1452	11.1596	8.5676	8.34079	10.347	10.9705	0	-0.23625	-0.617572	0	0.310953	0.395377	Synpcc7942_2309	Dawn	0	1.51345	1.67159	0	-1.112	-2.00769
199	2389912	2390239	2390031	0	3.57143	1.93732	2.26397	2.25927	7.08044	3.66863	0	-0.882439	-0.657647	0	1.64798	0.699386	Synpcc7942_2321	0	0	-1.34965	-0.767925	0	1.28257	0.918293
200	2398291	2398993	2398619	0	3.81482	4.62418	6.16637	2.86408	1.34758	2.50265	0	0.277581	0.692804	0	-1.08769	-0.194611	Synpcc7942_2331	0	0	0.907719	0.924163	0	-1.00123	-1.38933
201	2401925	2402189	2402066	9.403e-140	4.83483	2.25685	1.56602	2.81748	2.02667	1.46801	0	-1.09916	-1.62636	0	-0.475295	-0.940541		0	0	0	0	0	0	0
202	2404729	2405167	2405008	0	6.63956	4.04525	5.50555	3.07247	5.63187	3.25843	0	-0.714859	-0.270201	0	0.874214	0.0847766		0	0	0	0	0	0	0
203	2410994	2411503	2411226	0	5.06103	0.739683	1.78815	3.56492	4.07032	3.94665	0	-2.77445	-1.50097	0	0.191274	0.146761	Synpcc7942_2343	0	0	-3.72475	-2.01759	0	0.977901	0.382792
203	2410994	2411503	2411226	0	5.06103	0.739683	1.78815	3.56492	4.07032	3.94665	0	-2.77445	-1.50097	0	0.191274	0.146761	Synpcc7942_2344	0	0	-0.778732	-0.359844	0	0.275815	0.332361
204	2419904	2420547	2420252	0	3.55812	2.39689	2.0338	3.08593	7.86871	6.09191	0	-0.569948	-0.806932	0	1.35042	0.981187	Synpcc7942_2352	Dusk	0	-5.68717	-4.50531	0	4.24988	3.90933
204	2419904	2420547	2420252	0	3.55812	2.39689	2.0338	3.08593	7.86871	6.09191	0	-0.569948	-0.806932	0	1.35042	0.981187	Synpcc7942_2353	0	0	-1.47978	-1.7757	0	2.69605	2.54774
205	2486511	2486841	2486671	0	6.85511	6.09496	7.92565	6.17795	6.04361	5.66795	0	-0.169564	0.209349	0	-0.0317165	-0.124301		0	0	0	0	0	0	0
206	2489110	2489432	2489270	0	3.75473	3.68322	2.87717	4.25491	5.56772	3.39263	0	-0.0277419	-0.38406	0	0.387956	-0.326726	Synpcc7942_2416	0	0	4.20295	2.05699	0	-1.66191	-2.18447
207	2498523	2498973	2498734	0	7.2757	3.10915	3.90544	3.25703	3.88843	2.45278	0	-1.22657	-0.8976	0	0.25563	-0.409141	Synpcc7942_2425	0	0	2.37441	1.88561	0	-1.70655	-2.43557
208	2521495	2521955	2521807	0	2.69122	3.17111	2.48175	2.72215	4.03838	2.51023	0	0.236726	-0.116903	0	0.569028	-0.116927	Synpcc7942_2444	0	0	0.75477	0.960151	0	-0.88294	-0.741408
209	2538483	2539360	2539217	0	3.15118	2.6651	1.84046	2.28038	3.91219	2.14531	0	-0.241702	-0.775824	0	0.778701	-0.0880889		0	0	0	0	0	0	0
210	2539442	2542127	2539793	0	3.71055	3.87779	3.89567	4.98141	4.97724	5.00408	0	0.0636043	0.0702388	0	-0.00120892	0.00655175		0	0	0	0	0	0	0
211	2557996	2558354	2558174	0	3.05479	0.886954	1.05205	2.17695	4.98608	4.66861	0	-1.78414	-1.53787	0	1.1956	1.10068	Synpcc7942_2476	Dusk	0	-1.30554	-0.880804	0	1.28773	1.14828
212	2562681	2563635	2563200	0	3.84925	5.08241	4.74132	6.54835	5.41867	3.69834	0	0.400934	0.300711	0	-0.273193	-0.824254	Synpcc7942_2481	0	0	-0.0889992	-0.457113	0	-0.738679	0.355029
213	2567031	2567981	2567678	0	5.78543	6.50993	4.15026	6.10476	6.73757	7.55781	0	0.170217	-0.479223	0	0.142294	0.308034		0	0	0	0	0	0	0
214	2587651	2588183	2587993	0	5.32584	3.80078	3.23385	3.53824	2.96612	3.67731	0	-0.486712	-0.719758	0	-0.254454	0.0556213	Synpcc7942_2507	Dusk	0	-0.492948	-0.727932	0	0.86101	1.56906
215	2608194	2608475	2608328	4.42708e-269	4.79574	2.75259	1.14328	3.44847	4.9389	2.17347	0	-0.800965	-2.06858	0	0.518233	-0.665957		0	0	0	0	0	0	0
216	2616512	2616816	2616583	5.20151e-127	2.97086	4.14117	2.04942	0.321847	0.780895	2.06357	0	0.479158	-0.535666	0	1.27876	2.6807		0	0	0	0	0	0	0
217	2687906	2688911	2688078	0	6.21073	4.08809	3.21517	4.65056	6.96153	6.55299	0	-0.603337	-0.949867	0	0.581999	0.494749	Synpcc7942_2605	0	0	-0.904896	-0.974338	0	1.0261	1.07482
218	2692655	2693217	2692930	0	5.74422	5.07438	7.60865	4.26826	4.02848	4.04679	0	-0.17888	0.40553	0	-0.0834144	-0.0768707		0	0	0	0	0	0	0

## Sheet: Replicate 1
					Enrichment over mock at peak max location						Log2 normalized change in enrichment from original condition								Log2 normalized change in gene target expression from original condition
					Minutes in High Light pulse			Minutes in Shade pulse			Minutes in High Light pulse			Minutes in Shade pulse					Minutes in High Light pulse			Minutes in Shade pulse
					0	15	60	0	15	60	0	15	60	0	15	60			0	15	60	0	15	60
					Hours since dawn			Hours since dawn			Hours since dawn			Hours since dawn					Hours since dawn			Hours since dawn
RpaB Peak #	Start	End	Peak max location	Q-value	8	8.25	9	8	8.25	9	8	8.25	9	8	8.25	9	Gene target of peak	High confidence class of gene target	8	8.25	9	8	8.25	9
1	36234	36550	36376	2.69883e-209	6.38924	2.94602	4.17663	5.13193	6.12345	5.28677	0	-1.11688	-0.613306	0	0.254845	0.0428873		0	0	0	0	0	0	0
2	46568	46883	46741	0	4.96657	2.41359	3.13184	4.2024	6.37892	5.64549	0	-1.04107	-0.665238	0	0.602099	0.425884		0	0	0	0	0	0	0
3	50838	52312	51439	0	5.89472	3.76044	4.44855	6.36588	7.31817	6.87032	0	-0.648524	-0.406089	0	0.201124	0.110018		0	0	0	0	0	0	0
4	52350	53997	53614	0	3.04881	2.27802	2.7353	4.05197	4.75688	3.44401	0	-0.420464	-0.156546	0	0.231394	-0.234533		0	0	0	0	0	0	0
5	54874	56127	55234	0	4.16762	3.3565	3.61796	5.04048	6.2512	5.48482	0	-0.312265	-0.204046	0	0.310572	0.121883	Synpcc7942_0052	0	0	0.133805	-0.427314	0	0.752386	-0.0419932
6	63177	63707	63333	0	6.94959	5.03432	6.102	7.03998	7.87617	7.62616	0	-0.465132	-0.187646	0	0.161924	0.115387		0	0	0	0	0	0	0
7	87285	87667	87453	0	6.0278	1.48544	1.56742	3.08199	11.8261	11.7409	0	-2.02074	-1.94324	0	1.94005	1.92961		0	0	0	0	0	0	0
8	90192	90556	90364	0	7.45604	8.1882	8.08425	9.13451	7.47432	7.30433	0	0.135136	0.116703	0	-0.289386	-0.322576	Synpcc7942_0091	0	0	1.96564	0.644295	0	0.454416	0.0422614
9	94196	94483	94332	1.37754e-144	2.38669	1.6765	1.73323	2.4617	3.74573	3.90905	0	-0.509556	-0.461545	0	0.605596	0.667166	Synpcc7942_0096	Dusk	0	-3.91825	-3.0243	0	2.22644	1.86466
10	101019	101311	101114	4.46504e-202	3.60825	1.98223	2.00668	3.02549	3.98524	4.70802	0	-0.864174	-0.84649	0	0.397497	0.637951	Synpcc7942_0100	Dusk	0	-3.96002	-2.75936	0	3.0796	4.45288
10	101019	101311	101114	4.46504e-202	3.60825	1.98223	2.00668	3.02549	3.98524	4.70802	0	-0.864174	-0.84649	0	0.397497	0.637951	Synpcc7942_0101	Dawn	0	0.684045	0.296839	0	-0.629991	-0.164333
11	103995	104308	104153	1.14977e-225	8.97032	4.84825	6.44255	6.43899	7.10875	6.22837	0	-0.887696	-0.477528	0	0.142761	-0.0479802		0	0	0	0	0	0	0
12	114084	114347	114210	5.57392e-248	8.61636	6.1538	7.1316	7.6348	7.45639	6.73761	0	-0.485601	-0.272852	0	-0.034113	-0.180353		0	0	0	0	0	0	0
13	119090	119498	119283	0	22.2493	1.67405	3.35389	8.34152	15.212	21.2425	0	-3.73234	-2.72985	0	0.866827	1.34857		0	0	0	0	0	0	0
14	129443	130091	129611	1.31134e-193	3.55901	3.37702	3.54215	4.28275	4.16533	4.7311	0	-0.0757279	-0.00685227	0	-0.040105	0.143638	Synpcc7942_0130	0	0	-0.641199	-0.860655	0	1.15905	0.634788
15	152167	152898	152304	0	4.98004	2.99982	3.62809	5.44237	6.45773	4.54872	0	-0.731282	-0.456948	0	0.246793	-0.258774		0	0	0	0	0	0	0
16	159444	159870	159774	1.25752e-59	3.5005	2.14107	2.47878	2.99173	3.45964	3.27732	0	-0.709227	-0.497931	0	0.209642	0.131535	Synpcc7942_0157	0	0	-1.72296	-1.4029	0	1.58196	1.23391
17	176502	177772	177558	0	4.16963	2.66468	3.22777	3.97809	5.12276	4.4759	0	-0.645957	-0.369382	0	0.364848	0.170103		0	0	0	0	0	0	0
18	179753	180373	179931	0	4.38405	2.97674	3.66894	4.8491	6.27001	5.12505	0	-0.558531	-0.256901	0	0.370749	0.0798466	Synpcc7942_0181	0	0	-0.60926	-1.02353	0	2.69278	2.1961
19	198781	199090	198939	0	8.522	6.8814	6.71623	7.18095	8.56489	10.4428	0	-0.30849	-0.343541	0	0.25426	0.540259	Synpcc7942_0197	0	0	2.24507	1.10208	0	-0.625569	-0.661036
20	217648	218099	217846	4.8913e-152	3.67396	1.14612	1.50219	3.1817	4.46141	4.49324	0	-1.68058	-1.29027	0	0.487703	0.497959	Synpcc7942_0215	Dusk	0	-3.43166	-2.64247	0	1.97929	1.91839
21	218907	219278	219083	8.16329e-120	3.31702	3.77014	3.97055	4.04595	3.82457	4.34633	0	0.184731	0.259451	0	-0.0811802	0.103318	Synpcc7942_0217	0	0	2.19921	0.804325	0	-1.00532	-0.0529506
22	231545	232168	231917	0	8.30002	5.48263	6.26568	6.66624	7.35027	6.66186	0	-0.598247	-0.405644	0	0.140923	-0.000949097	Synpcc7942_0236	Dusk	0	-3.64184	-2.82518	0	1.49152	1.37245
23	235257	235566	235408	1.04964e-185	7.28623	3.83819	3.89174	5.26649	6.06339	6.07182	0	-0.924746	-0.904755	0	0.203281	0.205285	Synpcc7942_0240	Dusk	0	-1.74159	-0.648829	0	-0.0559732	-0.988512
24	238269	238890	238558	0	7.77244	12.0718	9.71152	8.20971	8.03756	7.83527	0	0.635203	0.321329	0	-0.030575	-0.0673492	Synpcc7942_0243	Dusk	0	4.27937	1.42504	0	0.0936107	0.0766852
25	255207	255597	255423	0	7.42707	6.56539	7.89774	8.12998	7.46473	8.74318	0	-0.177913	0.0886473	0	-0.123162	0.104907	Synpcc7942_0259	Dawn	0	-1.51481	-0.307964	0	-0.661947	-1.64167
26	263170	263590	263364	3.74528e-206	2.62074	1.30664	1.28094	2.09598	4.99904	4.90341	0	-1.00411	-1.03278	0	1.25403	1.22616	Synpcc7942_0267	Dusk	0	-1.77245	-1.99052	0	2.7702	3.20719
27	269769	270411	270015	1.27711e-201	2.92553	2.43735	2.30113	2.83549	3.87922	3.32137	0	-0.263386	-0.346359	0	0.45217	0.228181		0	0	0	0	0	0	0
28	294645	295009	294821	8.87463e-247	8.28877	7.41467	7.08874	6.51815	5.78204	7.21037	0	-0.160776	-0.22563	0	-0.172884	0.14561	Synpcc7942_0297	0	0	0.996976	-0.255484	0	-0.626748	-0.772994
29	309024	309398	309267	1.18096e-172	3.71529	2.60286	2.59863	3.0055	4.43925	4.13095	0	-0.513379	-0.515724	0	0.562713	0.45887	Synpcc7942_0309	Dusk	0	-0.89318	-0.645518	0	1.35985	0.848577
30	318503	318844	318703	5.58364e-257	5.82567	3.45565	3.37804	4.92829	6.40042	5.89932	0	-0.753466	-0.786237	0	0.377079	0.25946	Synpcc7942_0321	0	0	-0.891791	-0.435002	0	0.798026	0.422957
31	323465	323828	323704	1.01187e-251	5.83095	3.06858	4.27673	4.6417	3.82122	3.94826	0	-0.926159	-0.447221	0	-0.280619	-0.233436	Synpcc7942_0327	0	0	-2.10922	-0.938733	0	0.118229	-0.921151
32	325862	326251	326073	2.78238249698400e-311	7.0048	5.28301	6.50977	7.33619	6.95494	6.67216	0	-0.406983	-0.105738	0	-0.0769932	-0.136876	Synpcc7942_0328	0	0	-2.50086	-0.948838	0	0.106044	-0.981943
33	346280	346615	346397	0	4.97579	3.33917	3.81778	5.59706	5.79598	5.8977	0	-0.575437	-0.382191	0	0.0503829	0.0754834		0	0	0	0	0	0	0
34	355666	356002	355826	3.19268e-244	6.80837	4.37386	4.83577	6.44785	8.13178	7.14717	0	-0.638403	-0.493565	0	0.334753	0.148553	Synpcc7942_0364	0	0	2.71618	0.78166	0	-1.02386	-1.17307
35	368246	368571	368369	2.79589e-141	2.96399	2.96026	3.13646	3.69416	3.17205	2.94615	0	-0.00181775	0.0815956	0	-0.219834	-0.326417		0	0	0	0	0	0	0
36	371980	372458	372218	1.94583e-267	3.11858	1.35809	1.84349	2.55662	3.52901	4.35108	0	-1.19932	-0.758453	0	0.465023	0.767134	Synpcc7942_0377	Dusk	0	-1.39848	-1.35675	0	1.50618	1.75389
36	371980	372458	372218	1.94583e-267	3.11858	1.35809	1.84349	2.55662	3.52901	4.35108	0	-1.19932	-0.758453	0	0.465023	0.767134	Synpcc7942_0378	Dusk	0	0.0422772	-0.302692	0	0.437271	0.910527
37	378449	378755	378647	1.85545e-289	4.78881	2.06014	2.4612	5.38494	5.78008	3.74158	0	-1.21693	-0.960308	0	0.10216	-0.525281		0	0	0	0	0	0	0
38	392782	393090	392947	1.12961e-171	6.43182	3.84387	5.03976	4.97435	7.16493	7.31767	0	-0.742668	-0.351871	0	0.526444	0.556877	Synpcc7942_0398	0	0	1.19843	0.693721	0	-0.574107	-1.24823
39	401393	402021	401747	5.82500000000000e-321	5.01172	4.29263	4.42601	4.32801	4.40071	4.15746	0	-0.223445	-0.179301	0	0.0240334	-0.0580034		0	0	0	0	0	0	0
40	406114	406669	406340	0	6.3457	2.27361	2.55875	3.8597	10.04	8.26462	0	-1.48079	-1.31034	0	1.37919	1.09846	Synpcc7942_0415	0	0	-3.56987	-1.67803	0	1.40632	1.27183
40	406114	406669	406340	0	6.3457	2.27361	2.55875	3.8597	10.04	8.26462	0	-1.48079	-1.31034	0	1.37919	1.09846	Synpcc7942_0416	0	0	-2.61387	-2.5765	0	1.47835	1.36506
41	413481	414052	413730	0	13.0029	6.17622	7.51337	11.3016	14.0588	13.6787	0	-1.07404	-0.791303	0	0.314939	0.275395	Synpcc7942_0423	Dusk	0	-1.22173	-1.16507	0	1.34691	1.52473
41	413481	414052	413730	0	13.0029	6.17622	7.51337	11.3016	14.0588	13.6787	0	-1.07404	-0.791303	0	0.314939	0.275395	Synpcc7942_0424	0	0	-1.9288	-0.790619	0	0.944799	0.231823
42	441681	442094	441876	0	10.8418	3.78877	5.72542	9.32059	9.20738	7.56504	0	-1.5168	-0.921149	0	-0.0176304	-0.301073	Synpcc7942_0452	0	0	-1.41911	-1.19656	0	0.824727	0.345298
43	456593	457162	456934	0	5.22242	4.07375	4.02656	6.22313	6.68215	10.0773	0	-0.358362	-0.375172	0	0.102672	0.695397	Synpcc7942_0469	Dawn	0	0.223741	0.231885	0	-0.216359	-0.490867
43	456593	457162	456934	0	5.22242	4.07375	4.02656	6.22313	6.68215	10.0773	0	-0.358362	-0.375172	0	0.102672	0.695397	Synpcc7942_0470	0	0	-1.8071	-1.66285	0	0.666818	0.338486
44	478369	478954	478599	2.93621e-164	3.24617	2.29637	2.6122	3.52436	3.79236	4.30681	0	-0.499385	-0.313475	0	0.105733	0.289258		0	0	0	0	0	0	0
45	478995	479617	479327	5.56195e-228	3.01877	1.64015	1.66363	2.51293	3.80219	3.92234	0	-0.880132	-0.859627	0	0.59746	0.642346	Synpcc7942_0491	Dusk	0	-1.32753	-2.81464	0	0.813714	2.08395
46	480691	480975	480831	5.81568e-188	5.63577	3.59944	4.25898	4.80281	6.12266	5.6631	0	-0.646839	-0.404104	0	0.350279	0.237712		0	0	0	0	0	0	0
47	514124	514405	514316	1.56511e-51	4.25305	4.7777	3.66742	2.9681	2.87047	2.77277	0	0.167818	-0.21373	0	-0.0482502	-0.0982123		0	0	0	0	0	0	0
48	533057	533733	533459	0	15.4881	4.419	6.33058	11.4799	10.0953	7.93613	0	-1.80937	-1.29075	0	-0.185426	-0.532604	Synpcc7942_0551	Dusk	0	-3.02284	-1.94593	0	0.662496	0.168813
49	556873	557367	557118	0	9.04583	10.2523	10.2607	9.55759	8.86721	10.9158	0	0.180617	0.181807	0	-0.108166	0.191702	Synpcc7942_0575	0	0	-0.519867	-0.691879	0	0.139809	0.0362065
50	577871	578741	578111	0	21.7182	6.307	14.5571	13.2522	10.5619	10.912	0	-1.78388	-0.57718	0	-0.327364	-0.280327	Synpcc7942_0588	0	0	-0.797144	0.718641	0	-1.26975	-1.70491
51	583309	583720	583487	2.87201e-168	5.71744	3.19751	3.87918	4.32351	5.81412	7.0835	0	-0.838421	-0.559618	0	0.427357	0.712259	Synpcc7942_0595	Dusk	0	-0.915134	-0.661027	0	0.518867	-0.0733455
52	666616	667104	666838	0	14.8678	7.95203	10.4776	12.1155	9.35274	16.8072	0	-0.9028	-0.504891	0	-0.373392	0.472223	Synpcc7942_0672	Dusk	0	3.84477	2.06678	0	-1.41653	-1.49831
53	668853	669360	669173	4.48016e-289	5.87889	2.31866	3.35804	6.85565	8.26173	6.05008	0	-1.34225	-0.807922	0	0.269152	-0.180338	Synpcc7942_0674	Dawn	0	-2.03647	-0.393693	0	0.462349	-0.477876
54	672566	672961	672826	6.38949e-156	10.1626	4.94537	5.22755	6.54388	8.135	8.39888	0	-1.03911	-0.959056	0	0.313996	0.360051	Synpcc7942_0677	Dusk	0	-1.38719	-1.74167	0	1.69031	2.53518
55	690759	691177	690959	1.96473e-120	3.27789	1.77643	2.61298	3.12115	3.99667	3.51714	0	-0.88379	-0.327074	0	0.356721	0.172326	Synpcc7942_0697	Dawn	0	-0.707518	0.106629	0	-0.169084	-1.16524
55	690759	691177	690959	1.96473e-120	3.27789	1.77643	2.61298	3.12115	3.99667	3.51714	0	-0.88379	-0.327074	0	0.356721	0.172326	Synpcc7942_0698	0	0	2.66483	1.97966	0	-0.511256	-1.02826
56	692623	692982	692776	9.00627e-150	5.6329	3.74178	3.82631	5.43733	6.09167	5.83922	0	-0.590152	-0.557925	0	0.163939	0.102877	Synpcc7942_0700	0	0	-1.54137	-1.33876	0	1.27417	0.877481
57	749044	749382	749193	1.23281e-219	6.4986	2.86437	5.38136	4.43875	5.33038	4.82034	0	-1.18191	-0.272159	0	0.264082	0.11898		0	0	0	0	0	0	0
58	752122	753835	752443	0	4.13324	2.11807	2.48739	4.00526	5.73246	4.69383	0	-0.964522	-0.732641	0	0.517257	0.228869	Synpcc7942_0759	0	0	-1.00858	-1.69408	0	2.11939	1.31337
59	754311	754849	754583	0	2.70573	2.39521	2.32774	3.11506	3.59386	3.02593	0	-0.175865	-0.217091	0	0.206272	-0.0418824		0	0	0	0	0	0	0
60	760051	760433	760199	5.19045e-165	2.26829	0.741293	0.799006	1.32047	2.90263	5.71604	0	-1.61349	-1.50533	0	1.13631	2.11397	Synpcc7942_0768	Dusk	0	-3.3529	-3.48448	0	2.69175	3.54558
61	791701	792143	791936	0	10.7511	9.22209	9.19846	9.66108	7.89189	6.5652	0	-0.221322	-0.225023	0	-0.291814	-0.557345	Synpcc7942_0797	Dusk	0	-0.958666	-1.58167	0	0.992268	-0.533931
62	829288	829647	829464	0	4.55784	0.884088	0.645615	2.68642	12.3143	13.1785	0	-2.36609	-2.8196	0	2.19657	2.29442		0	0	0	0	0	0	0
63	830696	831060	830808	0	5.91737	0.9592	1.67639	5.82401	6.73405	8.68764	0	-2.62505	-1.8196	0	0.209461	0.576952		0	0	0	0	0	0	0
64	846322	846584	846494	0	7.95634	3.01145	3.51621	4.58117	8.15308	10.9532	0	-1.40165	-1.17808	0	0.83163	1.25757		0	0	0	0	0	0	0
65	846908	847353	847081	0	7.48447	7.34625	7.39985	7.60169	7.79097	9.45794	0	-0.026892	-0.0164031	0	0.0354838	0.315206	Synpcc7942_0850	Dawn	0	0.273662	0.453656	0	-0.242079	-1.13042
66	853117	854522	853512	0	5.05554	3.01075	3.90905	5.38743	7.79479	5.03708	0	-0.747742	-0.371044	0	0.532914	-0.0970078	Synpcc7942_0855	Dawn	0	-1.00371	-1.20228	0	2.70501	0.367168
67	862242	862894	862399	7.05698e-240	3.64584	2.98816	2.85282	3.72899	4.08619	3.99106	0	-0.286992	-0.35386	0	0.131974	0.0979882		0	0	0	0	0	0	0
68	863732	864454	864256	1.91818e-203	3.64621	2.27352	2.68662	2.88286	3.20205	3.13403	0	-0.681468	-0.440603	0	0.151494	0.120517		0	0	0	0	0	0	0
69	871766	872482	872289	4.17554e-270	3.80461	3.43397	3.34052	3.57879	4.22828	4.70534	0	-0.147869	-0.187675	0	0.2406	0.394827	Synpcc7942_0870	0	0	-0.28827	-1.31784	0	3.05467	3.01024
70	888900	889465	889197	0	28.2525	25.1697	20.8749	20.6984	15.5856	15.1938	0	-0.16669	-0.436613	0	-0.409304	-0.446038	Synpcc7942_0882	0	0	1.37787	0.938253	0	-0.641947	-0.431581
71	892866	893310	893057	0	12.4602	8.87432	10.5556	8.35735	7.79277	10.4822	0	-0.489624	-0.239322	0	-0.100908	0.326818	Synpcc7942_0885	0	0	0.817397	1.46731	0	-1.10963	-1.6177
72	901499	901962	901659	9.64859e-74	3.52741	2.47005	3.09428	2.86007	3.01513	2.87149	0	-0.514069	-0.189008	0	0.0761666	0.00574907	Synpcc7942_0891	0	0	-0.927076	-0.71872	0	1.3616	1.17883
73	902753	903303	903087	5.92852e-305	4.01093	3.11785	3.17084	3.06849	3.97711	4.76863	0	-0.363386	-0.33907	0	0.374194	0.636049		0	0	0	0	0	0	0
74	909592	909879	909733	1.81923e-155	7.95765	3.52348	4.68151	5.61646	6.93924	6.29602	0	-1.17534	-0.765371	0	0.305117	0.164779	Synpcc7942_0900	0	0	-2.7895	-1.99707	0	2.14456	3.07333
75	915280	915732	915446	0	8.03059	4.50394	5.96012	6.16362	8.60541	7.59297	0	-0.83432	-0.430165	0	0.481467	0.300887	Synpcc7942_0905	Dusk	0	-1.87956	-1.59865	0	3.76307	2.81495
76	916026	917387	916269	0	2.985	2.3787	2.42899	3.62534	3.97607	3.56101	0	-0.327554	-0.297375	0	0.133229	-0.0258293		0	0	0	0	0	0	0
77	926904	927210	927075	7.76909e-144	5.93214	1.81258	2.86234	4.92757	4.45788	4.69122	0	-1.7105	-1.05136	0	-0.144518	-0.0709146	Synpcc7942_0920	Dawn	0	-2.09101	-1.42388	0	0.00292257	-1.40383
78	949733	950332	949923	1.95325e-149	4.63213	3.85676	3.86859	4.36118	4.82029	6.2839	0	-0.264287	-0.259869	0	0.144404	0.526942	Synpcc7942_0942	0	0	0.962244	-0.33689	0	0.248774	0.0733849
78	949733	950332	949923	1.95325e-149	4.63213	3.85676	3.86859	4.36118	4.82029	6.2839	0	-0.264287	-0.259869	0	0.144404	0.526942	Synpcc7942_0943	0	0	-0.778607	0.162086	0	0.0571566	-0.391875
79	976121	976502	976253	0	7.03102	6.73061	6.65933	6.69021	8.07715	9.72792	0	-0.0629949	-0.0783569	0	0.271795	0.54008		0	0	0	0	0	0	0
80	994905	995190	995095	9.7903e-137	4.35714	1.62379	2.16203	2.89548	4.25238	5.81649	0	-1.42402	-1.011	0	0.554472	1.00635		0	0	0	0	0	0	0
81	997817	998516	998142	6.08744e-145	3.57848	2.88668	2.96727	3.8909	3.99852	4.31734	0	-0.309936	-0.270211	0	0.0393634	0.150041	Synpcc7942_0989	Dusk	0	-1.24832	-1.52397	0	1.14997	1.68035
82	1013673	1014000	1013864	1.06231925914580e-310	6.22119	1.47887	2.44116	4.82199	5.3894	4.78638	0	-2.0727	-1.34963	0	0.160494	-0.010694	Synpcc7942_1002	0	0	-3.25727	-1.51602	0	0.544329	-0.0462738
83	1019025	1019906	1019298	2.73397e-164	5.81225	3.2569	2.89883	4.18879	5.48735	5.33377	0	-0.835596	-1.00362	0	0.389574	0.34862		0	0	0	0	0	0	0
84	1020264	1020689	1020515	6.56014e-81	3.72887	3.37186	3.2363	2.97655	3.22985	3.18631	0	-0.145195	-0.204394	0	0.117826	0.0982445		0	0	0	0	0	0	0
85	1039601	1040067	1039949	1.44031e-252	5.98494	3.90145	4.59713	4.14784	4.52572	3.44898	0	-0.617324	-0.380602	0	0.125786	-0.266194		0	0	0	0	0	0	0
86	1043266	1043716	1043452	0	8.51519	6.68908	7.1843	8.5724	8.64605	9.05178	0	-0.348231	-0.245192	0	0.0123409	0.0785011	Synpcc7942_1029	0	0	0.129758	0.526393	0	0.0223638	-0.699783
87	1055456	1055782	1055585	0	10.936	3.15727	4.23598	5.62285	8.72609	11.0807	0	-1.79234	-1.36832	0	0.634034	0.978672	Synpcc7942_1042	Dusk	0	-2.92935	-2.30368	0	0.3085	-0.107992
88	1059641	1060338	1059907	0	16.2604	12.3343	13.7676	14.3127	16.8605	14.6225	0	-0.398692	-0.240093	0	0.236348	0.0308952	Synpcc7942_1047	0	0	-3.52226	-2.85594	0	1.46989	-1.47725
89	1074721	1075444	1075069	0	3.67646	3.26167	3.50606	4.29317	4.69734	4.7793	0	-0.172708	-0.0684689	0	0.129802	0.154755		0	0	0	0	0	0	0
90	1108175	1108553	1108325	0	21.1689	12.6114	12.5572	16.0338	17.6059	22.4181	0	-0.747216	-0.753432	0	0.134943	0.483551	Synpcc7942_1090	0	0	1.92096	1.01218	0	-1.00266	-1.81912
91	1109349	1110095	1109511	0	30.0851	13.5134	11.4535	18.2915	27.2518	24.4667	0	-1.15466	-1.39327	0	0.575177	0.419645		0	0	0	0	0	0	0
92	1134237	1134608	1134352	4.98328e-274	3.80058	3.90066	4.61022	4.70631	3.93956	4.0875	0	0.0374979	0.278617	0	-0.256562	-0.203379	Synpcc7942_1117	0	0	0.118504	-0.209295	0	-0.243661	-0.390823
93	1136547	1136848	1136682	7.66424e-67	3.27692	2.26377	2.65202	3.21734	3.54544	3.79838	0	-0.533612	-0.305245	0	0.140097	0.239515		0	0	0	0	0	0	0
94	1137851	1138335	1138100	0	10.2104	7.34034	8.88081	10.0182	10.2048	14.2547	0	-0.476126	-0.201281	0	0.0266199	0.50882	Synpcc7942_1120	0	0	6.73727	2.60321	0	0.156048	-4.08327
95	1155416	1157406	1155980	0	5.06394	3.36435	3.90375	4.73465	5.39443	5.10998	0	-0.589932	-0.375401	0	0.188212	0.11006		0	0	0	0	0	0	0
96	1172465	1172823	1172629	8.37348e-209	3.46925	2.51663	2.60778	3.7687	3.93596	3.63993	0	-0.463132	-0.411804	0	0.0626461	-0.0501567	Synpcc7942_1148	0	0	-1.99263	-2.06959	0	2.65918	3.67458
97	1178715	1179275	1178966	0	23.118	27.4691	24.1136	19.7454	16.3143	17.0927	0	0.248795	0.0608345	0	-0.275377	-0.208132	Synpcc7942_1152	0	0	0.315483	0.149394	0	-0.536207	-0.550663
98	1189985	1190888	1190499	0	6.60563	4.48299	4.66875	6.32483	6.99707	5.87686	0	-0.559236	-0.50066	0	0.145726	-0.105981		0	0	0	0	0	0	0
99	1190967	1191671	1191546	0	3.72898	3.23357	3.32616	3.78141	4.13325	4.00215	0	-0.205651	-0.164921	0	0.128349	0.0818481		0	0	0	0	0	0	0
100	1192456	1192736	1192604	5.43141e-143	2.91571	1.82604	1.77612	3.17032	3.98173	3.70356	0	-0.675127	-0.715122	0	0.328765	0.224281		0	0	0	0	0	0	0
101	1236750	1237287	1237023	0	19.6247	20.204	19.5651	17.7306	13.3424	14.4734	0	0.0419657	-0.00439335	0	-0.410221	-0.292838		0	0	0	0	0	0	0
102	1246001	1246334	1246140	0	8.14702	6.69243	6.19759	8.2029	7.23512	6.58126	0	-0.283742	-0.394564	0	-0.181116	-0.317771	Synpcc7942_1224	0	0	1.40388	0.417686	0	-0.2506	-0.332512
103	1253373	1254821	1253616	0	9.72731	8.31387	10.6759	10.2664	9.17766	8.36278	0	-0.226521	0.13424	0	-0.16173	-0.295873	Synpcc7942_1232	Dawn	0	0.362743	0.956845	0	-1.13913	-2.25651
104	1254041	1254843	1254202	0	3.70706	2.50393	2.79154	3.15856	4.29418	4.14658	0	-0.566083	-0.409214	0	0.443114	0.392653		0	0	0	0	0	0	0
105	1253995	1254830	1254654	0	3.89729	2.60742	3.00926	3.57894	3.91964	3.64986	0	-0.579845	-0.37306	0	0.13119	0.0283088		0	0	0	0	0	0	0
106	1269355	1269680	1269479	5.36279e-54	3.06147	3.75809	3.51686	3.33035	2.6095	2.62875	0	0.295777	0.200062	0	-0.351898	-0.341296		0	0	0	0	0	0	0
107	1277269	1277561	1277409	9.04736e-242	4.25266	1.24879	1.57229	3.67808	6.09529	3.26539	0	-1.76784	-1.4355	0	0.728741	-0.171696	Synpcc7942_1254	Dawn	0	-0.764274	-0.41273	0	0.449492	-0.241025
108	1294873	1295319	1295057	4.63384e-277	7.32991	4.64678	5.63865	7.02436	5.96044	7.89415	0	-0.657564	-0.378446	0	-0.236947	0.168418		0	0	0	0	0	0	0
109	1351338	1351811	1351482	0	9.29856	2.2371	5.03081	6.99486	8.23528	9.81229	0	-2.05538	-0.886216	0	0.235522	0.488295	Synpcc7942_1322	0	0	-4.01766	-1.54819	0	0.69637	0.512094
110	1366942	1367349	1367079	0	7.22742	3.316	3.97055	4.76614	6.37204	5.7223	0	-1.12404	-0.864144	0	0.418935	0.263775		0	0	0	0	0	0	0
111	1385190	1385478	1385324	2.47969e-108	4.21405	3.65506	4.01828	4.19087	4.84492	6.05234	0	-0.205312	-0.0686275	0	0.209226	0.530244		0	0	0	0	0	0	0
112	1388760	1390382	1389028	0	4.88533	4.58404	4.03872	4.71872	4.57593	4.44276	0	-0.0918359	-0.274557	0	-0.0443322	-0.0869394		0	0	0	0	0	0	0
113	1396660	1397092	1396920	8.54002e-308	3.0664	2.85533	2.71109	3.08505	3.62776	3.83545	0	-0.102889	-0.177673	0	0.233783	0.314102		0	0	0	0	0	0	0
114	1413979	1414343	1414233	6.53556e-176	2.63346	2.11697	2.45944	3.18232	3.58782	3.09718	0	-0.314957	-0.0986283	0	0.173031	-0.039122	Synpcc7942_1373	0	0	-0.854759	-0.0126515	0	1.10512	0.183312
115	1427015	1427690	1427281	0	20.0211	13.6366	15.2282	14.3533	13.9889	15.5413	0	-0.554031	-0.394775	0	-0.0371026	0.114719		0	0	0	0	0	0	0
116	1435543	1436158	1435794	0	12.3703	8.92882	10.4485	8.96133	8.81493	9.95315	0	-0.470344	-0.243594	0	-0.0237648	0.15144		0	0	0	0	0	0	0
117	1440916	1441328	1441139	2.2514e-215	3.52637	3.81192	3.46257	4.42491	4.16589	4.05863	0	0.112337	-0.0263404	0	-0.0870251	-0.124658		0	0	0	0	0	0	0
118	1442010	1442440	1442299	0	3.97741	4.04533	4.88365	5.09661	3.9436	4.27585	0	0.0244287	0.29613	0	-0.370024	-0.253325		0	0	0	0	0	0	0
119	1445949	1446344	1446133	1.95003e-201	4.8753	0.707983	1.00956	2.44989	5.2026	5.67739	0	-2.78371	-2.27177	0	1.08652	1.21251	Synpcc7942_1396	Dusk	0	-1.55131	-2.51549	0	0.625534	1.4547
119	1445949	1446344	1446133	1.95003e-201	4.8753	0.707983	1.00956	2.44989	5.2026	5.67739	0	-2.78371	-2.27177	0	1.08652	1.21251	Synpcc7942_1397	Dusk	0	-3.46512	-2.80296	0	1.73784	1.10354
120	1448820	1449418	1449060	1.12813e-237	4.96855	2.28879	2.62196	2.915	4.65879	4.72074	0	-1.11824	-0.922181	0	0.676462	0.69552		0	0	0	0	0	0	0
121	1449922	1450363	1450105	1.97811e-138	3.29212	2.59063	3.38918	3.475	3.413	4.86605	0	-0.345717	0.0419191	0	-0.0259709	0.485739		0	0	0	0	0	0	0
122	1450364	1451401	1450532	2.82972e-88	2.69621	2.3419	2.90453	3.09457	3.32773	3.86318	0	-0.20325	0.107375	0	0.104799	0.32005		0	0	0	0	0	0	0
123	1452345	1452816	1452478	1.35158e-219	3.90831	2.73094	3.18243	3.60947	4.61796	4.13385	0	-0.517146	-0.296418	0	0.355468	0.195698	Synpcc7942_1400	0	0	-0.31282	-0.514905	0	1.23358	1.36919
124	1506109	1506573	1506294	1.74485e-227	5.38284	3.63613	4.29244	5.06954	4.59311	4.40879	0	-0.565965	-0.326571	0	-0.142385	-0.201474	Synpcc7942_1453	0	0	-1.54022	-0.0609193	0	-1.0288	-1.49831
125	1508259	1508554	1508372	2.66928e-160	7.8116	3.89084	4.01898	4.55141	6.86143	7.10213	0	-1.00554	-0.95879	0	0.592197	0.641938	Synpcc7942_1455	0	0	1.14156	0.86336	0	-2.7256	-1.28321
126	1552948	1553314	1553068	1.39009e-146	4.90915	4.29542	3.73424	5.08761	4.50658	3.96516	0	-0.192676	-0.394659	0	-0.174956	-0.35961		0	0	0	0	0	0	0
127	1561244	1561495	1561374	8.5599e-119	5.00757	3.2781	2.81057	3.56045	5.29034	4.36764	0	-0.611252	-0.833247	0	0.5713	0.294794	Synpcc7942_1510	0	0	-1.28412	-0.965888	0	2.39041	1.99913
128	1563284	1563571	1563435	7.75171e-214	6.46589	4.127	4.71425	5.65106	8.02111	6.91208	0	-0.647756	-0.45582	0	0.505281	0.290599	Synpcc7942_1513	Dawn	0	-0.886894	-0.234851	0	-0.0645336	-0.658384
129	1597644	1598337	1597845	0	3.3067	3.06069	3.50145	3.95715	4.26506	4.8075	0	-0.111534	0.0825626	0	0.108104	0.280824		0	0	0	0	0	0	0
130	1598327	1599491	1598455	7.73519e-146	3.25827	2.78972	2.73539	3.07858	3.55785	3.62678	0	-0.223985	-0.252361	0	0.20874	0.236422		0	0	0	0	0	0	0
131	1600286	1600645	1600425	8.25783e-289	6.85041	3.4581	4.0457	5.69761	8.50058	7.53453	0	-0.986211	-0.759803	0	0.577204	0.40316		0	0	0	0	0	0	0
132	1605493	1606116	1605726	0	11.2896	5.38042	7.28905	8.43962	8.95357	10.4847	0	-1.06921	-0.631194	0	0.0852839	0.313042	Synpcc7942_1548	Dawn	0	-0.58113	-0.2129	0	1.2676	0.632322
133	1614323	1614979	1614546	0	6.13438	2.3196	2.55413	4.01222	9.4897	8.6335	0	-1.40304	-1.26409	0	1.24196	1.10555	Synpcc7942_1557	Dusk	0	-0.904593	-0.421132	0	1.10302	-0.604833
134	1617240	1617782	1617571	2.11508e-291	4.14416	3.70726	3.98096	4.77532	4.63363	4.43165	0	-0.160723	-0.0579614	0	-0.0434544	-0.107755		0	0	0	0	0	0	0
135	1625958	1626264	1626113	5.98627e-250	11.575	6.92581	6.01001	8.6287	8.8409	9.04282	0	-0.740958	-0.945573	0	0.0350499	0.0676306	Synpcc7942_1567	Dusk	0	-4.48295	-2.56442	0	1.84481	2.16406
136	1630613	1631204	1630981	2.40985e-251	3.61312	2.40842	2.37219	3.88154	4.15541	4.0212	0	-0.585158	-0.607029	0	0.0983636	0.0509992	Synpcc7942_1572	Dusk	0	-1.61315	-1.98175	0	2.68781	4.04005
137	1633197	1633631	1633315	6.83619e-98	3.23855	2.34426	2.56584	3.21883	4.13432	4.22771	0	-0.466216	-0.335918	0	0.361113	0.393341		0	0	0	0	0	0	0
138	1653036	1653440	1653256	4.44341e-223	4.67315	2.65409	3.18213	4.57281	5.38392	4.44147	0	-0.816177	-0.554405	0	0.235576	-0.0420436	Synpcc7942_1587	Dusk	0	-2.77538	-2.5826	0	1.92131	1.50245
139	1662579	1662971	1662821	1.47626323330000e-314	5.06503	4.08428	4.65867	4.70274	4.26089	4.25276	0	-0.310488	-0.120653	0	-0.142348	-0.145102	Synpcc7942_1596	0	0	1.40976	1.21038	0	-1.09368	-1.4525
140	1675229	1675534	1675366	8.23736e-222	5.93173	3.44915	5.70433	5.21349	5.79555	4.08109	0	-0.782213	-0.0563953	0	0.152694	-0.353296	Synpcc7942_1609	Dawn	0	0.473418	0.178148	0	-0.41069	-0.632589
141	1706443	1706799	1706574	0	11.4919	9.01031	9.59435	11.1418	11.2439	10.8678	0	-0.350965	-0.260356	0	0.0131599	-0.0359249	Synpcc7942_1638	0	0	0.124802	0.402547	0	0.131902	-0.135072
142	1707699	1708024	1707826	1.91267e-243	11.1505	5.47778	6.23167	6.41438	8.52011	9.16923	0	-1.02545	-0.839418	0	0.409562	0.51549		0	0	0	0	0	0	0
143	1714031	1714390	1714193	1.63323e-166	3.95425	2.24092	2.70118	3.27352	4.18537	3.89096	0	-0.819315	-0.549813	0	0.354513	0.249283	Synpcc7942_1646	Dusk	0	-2.28818	-1.72718	0	2.18218	2.07103
144	1729144	1729506	1729278	0	13.7883	5.40695	8.04506	8.35535	10.9609	11.7386	0	-1.35056	-0.777269	0	0.39159	0.490493	Synpcc7942_1659	0	0	0.722337	-0.227693	0	-0.0920698	-0.770962
145	1792279	1792685	1792435	0	9.33204	4.50023	6.16924	5.27649	5.88075	7.76619	0	-1.05219	-0.597099	0	0.15642	0.557627		0	0	0	0	0	0	0
146	1792761	1793366	1793224	0	3.80632	1.02629	1.31083	3.01899	7.97932	8.45978	0	-1.89095	-1.53792	0	1.4022	1.48655		0	0	0	0	0	0	0
147	1812556	1812930	1812766	4.20068e-179	4.04455	1.91762	2.46223	2.13715	4.30117	3.91897	0	-1.07666	-0.716015	0	1.00904	0.874785	Synpcc7942_1741	Dusk	0	-0.0419619	0.095188	0	-0.46643	-0.652238
147	1812556	1812930	1812766	4.20068e-179	4.04455	1.91762	2.46223	2.13715	4.30117	3.91897	0	-1.07666	-0.716015	0	1.00904	0.874785	Synpcc7942_1742	0	0	0.959684	0.92743	0	-1.86657	-2.41636
148	1826346	1826601	1826438	1.11048e-192	12.3741	6.44533	5.11019	8.77017	9.67389	8.72586	0	-0.941002	-1.27588	0	0.141491	-0.00730733	Synpcc7942_1758	Dusk	0	0.308708	0.0159207	0	-0.285523	0.362025
149	1840583	1840956	1840684	4.04738e-89	3.34328	2.27789	1.71893	2.11881	2.88005	4.35592	0	-0.553568	-0.95975	0	0.442838	1.03972	Synpcc7942_1776	Dusk	0	-0.998762	-1.18771	0	1.39399	2.40659
150	1843772	1844037	1843909	3.35182e-160	5.63131	4.0795	4.37145	5.144	5.34492	5.80783	0	-0.465078	-0.365358	0	0.0552763	0.175106		0	0	0	0	0	0	0
151	1852179	1852832	1852337	0	8.52637	3.77011	4.96319	5.39619	6.89468	7.43386	0	-1.17732	-0.780664	0	0.353543	0.46217	Synpcc7942_1784	Dusk	0	-5.46798	-4.33335	0	3.22948	3.94014
152	1854822	1855112	1854923	2.26357e-66	4.81316	4.17766	3.57636	3.76798	4.46604	4.1507	0	-0.204288	-0.428493	0	0.245207	0.139565	Synpcc7942_1787	0	0	0.732214	0.906125	0	-0.267418	-1.05209
153	1862890	1863418	1863180	1.67348e-258	7.6822	4.31565	5.22706	5.73818	7.9629	7.10923	0	-0.831941	-0.555518	0	0.472701	0.3091	Synpcc7942_1792	0	0	-1.61721	-0.239763	0	0.104846	-0.15111
154	1867371	1868142	1867562	0	6.34627	3.84879	3.85071	5.03871	5.55077	4.45643	0	-0.721503	-0.720785	0	0.139633	-0.177164		0	0	0	0	0	0	0
155	1875999	1876386	1876214	1.95933e-105	5.81857	5.03219	4.1632	3.96392	3.74595	4.38615	0	-0.209477	-0.482972	0	-0.0815997	0.146026		0	0	0	0	0	0	0
156	1880639	1881245	1880866	0	5.17562	2.93552	3.88258	4.82775	5.26618	4.88673	0	-0.818116	-0.414715	0	0.125405	0.0175191		0	0	0	0	0	0	0
157	1881269	1882159	1881945	0	3.75022	2.95835	2.87489	4.08769	4.13886	3.41972	0	-0.342184	-0.383469	0	0.0179467	-0.257407		0	0	0	0	0	0	0
158	1885342	1886380	1885746	4.8575e-307	5.70084	5.54736	4.95121	5.35461	4.86813	5.04114	0	-0.0393734	-0.203391	0	-0.137412	-0.0870323		0	0	0	0	0	0	0
159	1885940	1886389	1886060	1.60094e-120	2.87915	2.10036	2.71042	3.81132	4.14059	3.28246	0	-0.455011	-0.0871296	0	0.119547	-0.215514		0	0	0	0	0	0	0
160	1894035	1894469	1894305	9.24000000000000e-322	7.86195	5.39202	5.90099	6.5307	6.88276	7.50403	0	-0.544061	-0.41393	0	0.0757506	0.200429		0	0	0	0	0	0	0
161	1898922	1899276	1899000	2.00976e-61	3.72375	2.38682	2.71299	3.08051	3.53132	2.92943	0	-0.641663	-0.456873	0	0.197039	-0.0725504		0	0	0	0	0	0	0
162	1905816	1906189	1906026	0	4.22918	1.59843	1.82913	2.14909	5.22576	11.7368	0	-1.40372	-1.20922	0	1.28191	2.44924	Synpcc7942_1838	Dusk	0	-3.58394	-3.14671	0	3.33356	3.90225
163	1907319	1907645	1907468	0	9.26409	7.05478	7.94755	8.09451	9.00642	10.8399	0	-0.393048	-0.221138	0	0.154012	0.421339	Synpcc7942_1840	0	0	2.64506	1.40652	0	-0.44209	-1.2088
164	1913665	1913989	1913853	2.93861e-67	4.45643	3.58238	3.37705	3.0793	3.60171	4.80839	0	-0.314968	-0.400123	0	0.22608	0.642953	Synpcc7942_1846	0	0	1.06981	0.153676	0	-0.837133	0.000693143
165	1916218	1916797	1916387	4.26988e-163	6.09333	3.74907	4.1203	5.14616	5.37496	6.5109	0	-0.700697	-0.564482	0	0.0627578	0.339361	Synpcc7942_1849	Dusk	0	-4.5666	-4.20942	0	2.90001	4.11008
166	1926591	1926986	1926759	0	11.9442	3.8344	5.5352	9.56849	11.8038	8.66089	0	-1.63924	-1.10961	0	0.302886	-0.143776	Synpcc7942_1858	0	0	-2.7685	-1.07231	0	0.445897	-0.998119
167	1936737	1937152	1936890	0	7.98305	6.93941	7.3221	8.77579	11.0752	11.7736	0	-0.202127	-0.124683	0	0.335727	0.42396		0	0	0	0	0	0	0
168	1942780	1943294	1942896	1.58229e-206	5.87506	4.4844	4.97098	4.2965	5.71795	7.23534	0	-0.389689	-0.241073	0	0.412335	0.751898	Synpcc7942_1871	Dusk	0	-0.0160065	-1.0925	0	-0.109737	0.565159
169	1942857	1944280	1943963	0	3.81645	2.89741	3.16053	3.75527	3.78772	3.36033	0	-0.397471	-0.272068	0	0.0124121	-0.160314		0	0	0	0	0	0	0
170	1989562	1989855	1989641	3.65718e-165	5.97902	1.22013	2.32347	4.17017	5.63688	4.74788	0	-2.29287	-1.36363	0	0.43479	0.187178	Synpcc7942_1912a	0	0	-5.70099	-1.93338	0	1.89908	1.51337
171	2038491	2038804	2038577	2.24809e-51	3.08818	3.34165	3.08166	3.15377	3.15412	3.52867	0	0.113803	-0.00304638	0	0.000160362	0.162045		0	0	0	0	0	0	0
172	2052739	2053398	2052952	5.2297e-152	4.92184	6.90338	5.55197	4.88011	4.45488	5.34788	0	0.488106	0.173804	0	-0.131528	0.132053	Synpcc7942_1982	0	0	-0.254078	-0.16459	0	0.123129	-0.50458
172	2052739	2053398	2052952	5.2297e-152	4.92184	6.90338	5.55197	4.88011	4.45488	5.34788	0	0.488106	0.173804	0	-0.131528	0.132053	Synpcc7942_1983	0	0	2.18618	1.21781	0	-1.21025	-1.74526
173	2057523	2058178	2057742	0	12.9601	1.07531	1.18383	5.45791	12.7052	14.5286	0	-3.59125	-3.45254	0	1.219	1.41248	Synpcc7942_1986	0	0	-1.17206	-1.04309	0	1.05526	1.3277
173	2057523	2058178	2057742	0	12.9601	1.07531	1.18383	5.45791	12.7052	14.5286	0	-3.59125	-3.45254	0	1.219	1.41248	Synpcc7942_1987	Dusk	0	-4.40625	-3.88356	0	2.5245	2.14041
174	2061376	2062020	2061668	1.79896e-239	2.91573	2.12209	2.41503	3.39614	3.78494	3.13765	0	-0.458376	-0.271817	0	0.156377	-0.114212		0	0	0	0	0	0	0
175	2066119	2066724	2066424	0	14.7626	16.2207	16.6636	14.9935	13.1799	19.8093	0	0.135888	0.174752	0	-0.186004	0.401835	Synpcc7942_1997	0	0	5.99987	2.4079	0	-1.76149	-2.88533
176	2079916	2080350	2080168	0	5.45394	2.4719	2.8008	7.73627	6.62941	4.06053	0	-1.14168	-0.961459	0	-0.222756	-0.929969	Synpcc7942_2010	Dawn	0	-1.67226	-0.231453	0	0.390641	-1.10337
177	2100170	2100535	2100398	8.02858e-276	6.93841	1.31998	3.59164	6.61155	5.11278	4.00298	0	-2.39409	-0.949963	0	-0.370881	-0.723916	Synpcc7942_2030	0	0	-2.9216	-1.20687	0	0.347255	-0.691291
178	2104721	2104941	2104865	3.04629e-44	4.82042	4.64256	4.60574	3.58678	2.87255	3.78591	0	-0.0542372	-0.0657257	0	-0.320358	0.0779509		0	0	0	0	0	0	0
179	2126115	2126586	2126323	0	4.751	1.27249	1.98445	5.6332	6.53242	5.60858	0	-1.90058	-1.25949	0	0.213661	-0.00632109	Synpcc7942_2049	0	0	-2.52063	-1.58107	0	-0.448191	-0.895199
179	2126115	2126586	2126323	0	4.751	1.27249	1.98445	5.6332	6.53242	5.60858	0	-1.90058	-1.25949	0	0.213661	-0.00632109	Synpcc7942_2050	Dawn	0	-0.39088	-0.116759	0	-0.496659	0.479463
180	2148344	2148690	2148447	2.32858e-97	4.85826	3.35977	2.65124	3.54103	4.76276	4.73284	0	-0.532078	-0.873772	0	0.427631	0.418538		0	0	0	0	0	0	0
181	2150393	2150768	2150545	0	11.3056	3.76915	5.3258	7.60831	11.036	12.0793	0	-1.58472	-1.08597	0	0.536569	0.666887		0	0	0	0	0	0	0
182	2167739	2168364	2167952	0	10.1711	8.64202	9.90283	9.23312	8.49681	11.391	0	-0.235031	-0.0385583	0	-0.119897	0.303006	Synpcc7942_2088	Dawn	0	2.86488	1.03218	0	0.108154	0.134911
183	2198501	2198820	2198625	2.52535e-212	11.9333	5.81041	5.84034	6.24843	7.93768	8.42427	0	-1.03828	-1.03087	0	0.345223	0.431057		0	0	0	0	0	0	0
184	2206891	2207364	2207109	0	22.6511	12.7597	17.9288	15.9643	15.3013	15.2971	0	-0.827992	-0.337303	0	-0.0611912	-0.0615908	Synpcc7942_2126	0	0	0.885406	1.4915	0	0.712814	1.02323
184	2206891	2207364	2207109	0	22.6511	12.7597	17.9288	15.9643	15.3013	15.2971	0	-0.827992	-0.337303	0	-0.0611912	-0.0615908	Synpcc7942_2127	Dusk	0	3.66994	0.981346	0	-1.29974	-0.0472002
185	2216207	2216658	2216433	0	8.71993	6.65091	7.31851	7.84181	8.10954	9.74818	0	-0.390765	-0.252767	0	0.0484334	0.313946	Synpcc7942_2137	Dusk	0	-1.55859	0.143163	0	-0.308569	-0.555618
186	2221081	2221472	2221261	2.00541750000000e-316	3.36607	2.94399	2.90857	4.29065	4.21705	3.25	0	-0.19329	-0.210754	0	-0.0249634	-0.400758		0	0	0	0	0	0	0
187	2222392	2222844	2222593	0	3.09753	2.33453	2.78922	3.51948	3.91491	4.1178	0	-0.407989	-0.151259	0	0.153615	0.226511		0	0	0	0	0	0	0
188	2223276	2224360	2223552	0	3.06266	2.5851	2.621	3.31795	3.69187	3.83483	0	-0.244567	-0.224668	0	0.154061	0.20887		0	0	0	0	0	0	0
189	2234456	2235655	2234758	0	3.86613	3.49661	3.72762	4.19337	3.79649	3.6024	0	-0.144933	-0.0526367	0	-0.143443	-0.219153		0	0	0	0	0	0	0
190	2240745	2241256	2240939	0	21.8717	18.0039	17.3775	18.3154	12.4653	13.5823	0	-0.280761	-0.33185	0	-0.555143	-0.43133	Synpcc7942_2156	Dawn	0	-0.475606	0.817857	0	-0.680898	-1.59162
190	2240745	2241256	2240939	0	21.8717	18.0039	17.3775	18.3154	12.4653	13.5823	0	-0.280761	-0.33185	0	-0.555143	-0.43133	Synpcc7942_2158	Dawn	0	-1.72295	-0.509333	0	0.441419	-0.775505
191	2242525	2242779	2242637	2.93744e-59	3.79406	3.54764	3.28031	3.28462	3.24652	3.14157	0	-0.0968843	-0.209912	0	-0.0168336	-0.0642384	Synpcc7942_2160	Dawn	0	-0.576719	0.246083	0	-0.240123	-1.05261
192	2245361	2245797	2245591	0	14.2709	13.7855	11.726	12.308	11.4091	13.5867	0	-0.0499231	-0.283357	0	-0.109407	0.142596		0	0	0	0	0	0	0
193	2314949	2315366	2315101	5.95958e-209	2.67439	1.86105	1.48897	1.24341	2.34164	10.6858	0	-0.523094	-0.844895	0	0.913217	3.10332		0	0	0	0	0	0	0
194	2324786	2325180	2324941	0	10.6294	2.97232	4.93652	8.38783	8.68461	6.54525	0	-1.8384	-1.10649	0	0.0501627	-0.357849	Synpcc7942_2254	Dusk	0	-1.65664	-2.96641	0	2.41908	5.78835
195	2332864	2333277	2333057	0	12.9123	7.77046	9.1485	9.60499	10.4688	11.3445	0	-0.732679	-0.497144	0	0.124238	0.240137	Synpcc7942_2264	0	0	0.588522	0.137101	0	0.0698557	0.144976
196	2333984	2334246	2334094	1.95715e-172	5.52073	4.2166	4.01038	4.54819	6.6198	7.22517	0	-0.388779	-0.46112	0	0.541495	0.667739		0	0	0	0	0	0	0
197	2370528	2370832	2370691	1.83467e-72	5.84549	5.06895	5.06253	3.96175	4.01655	4.53069	0	-0.205637	-0.207465	0	0.0198169	0.193591		0	0	0	0	0	0	0
198	2377559	2377921	2377758	8.52854e-158	7.65535	6.39126	5.7627	6.2463	6.75701	7.97103	0	-0.260368	-0.409723	0	0.113383	0.351764	Synpcc7942_2309	Dawn	0	1.34403	1.34212	0	-1.21715	-2.2965
199	2389912	2390239	2390058	4.68634e-203	6.60773	2.77557	3.01395	4.28628	6.89157	6.04724	0	-1.25137	-1.1325	0	0.685106	0.496549	Synpcc7942_2321	0	0	-1.19785	-0.960207	0	1.62414	0.907274
200	2398291	2398993	2398520	0	5.72501	7.7978	7.92196	6.17582	5.53209	5.24505	0	0.44579	0.46858	0	-0.158806	-0.235676	Synpcc7942_2331	0	0	1.01383	0.506613	0	-0.834191	-1.76172
201	2401925	2402189	2402043	7.47648e-53	5.0616	3.27841	3.06433	3.61174	4.59739	4.68632	0	-0.626596	-0.724024	0	0.34812	0.37576		0	0	0	0	0	0	0
202	2404729	2405167	2404958	8.58143000000000e-319	10.2454	5.98284	6.37799	6.44469	8.25131	7.61182	0	-0.776069	-0.683798	0	0.356512	0.240129		0	0	0	0	0	0	0
203	2410994	2411503	2411230	0	7.44704	1.33964	2.75265	6.73933	7.45898	7.36306	0	-2.47482	-1.43585	0	0.146372	0.127699	Synpcc7942_2343	0	0	-3.26272	-2.10514	0	0.30094	0.0203966
203	2410994	2411503	2411230	0	7.44704	1.33964	2.75265	6.73933	7.45898	7.36306	0	-2.47482	-1.43585	0	0.146372	0.127699	Synpcc7942_2344	0	0	-0.746088	-0.256069	0	-0.400775	-0.163825
204	2419904	2420547	2420250	0	3.91294	1.57954	1.9182	3.13916	6.09815	4.78394	0	-1.30875	-1.0285	0	0.957992	0.60782	Synpcc7942_2352	Dusk	0	-4.76541	-4.09598	0	4.0077	3.00209
204	2419904	2420547	2420250	0	3.91294	1.57954	1.9182	3.13916	6.09815	4.78394	0	-1.30875	-1.0285	0	0.957992	0.60782	Synpcc7942_2353	0	0	-1.07143	-1.43049	0	2.52849	2.29587
205	2486511	2486841	2486680	7.06016e-280	10.5965	8.57945	8.08309	9.16613	8.70575	10.0427	0	-0.304625	-0.390602	0	-0.074344	0.131757		0	0	0	0	0	0	0
206	2489110	2489432	2489252	0	7.62607	6.05347	5.26176	7.2678	8.23685	6.6094	0	-0.333177	-0.535395	0	0.180573	-0.136998	Synpcc7942_2416	0	0	4.91933	2.72606	0	-2.72227	-1.33481
207	2498523	2498973	2498739	3.76386e-198	6.6305	4.62634	4.93665	5.06856	4.73182	5.89506	0	-0.519248	-0.425587	0	-0.0991799	0.217929	Synpcc7942_2425	0	0	1.8688	1.5691	0	-1.35084	-2.55327
208	2521495	2521955	2521768	5.46098e-210	2.95044	2.73079	2.96896	3.81726	3.56116	2.98525	0	-0.111613	0.00902871	0	-0.100191	-0.354688	Synpcc7942_2444	0	0	0.0639285	0.294798	0	-0.961866	-0.887204
209	2538483	2539360	2539244	1.84272e-87	3.56946	2.07323	2.24655	3.21223	3.37649	2.67967	0	-0.783824	-0.667992	0	0.0719482	-0.261521		0	0	0	0	0	0	0
210	2539442	2542127	2539793	0	3.16558	2.63859	3.18361	4.04973	4.04858	4.31777	0	-0.262704	0.00819508	0	-0.000411573	0.0924589		0	0	0	0	0	0	0
211	2557996	2558354	2558182	0	5.90721	2.90501	2.74238	4.23939	8.93432	7.16757	0	-1.02393	-1.10705	0	1.0755	0.757626	Synpcc7942_2476	Dusk	0	-1.30928	-0.635472	0	0.794034	0.968405
212	2562681	2563635	2563251	0	5.38243	4.24423	4.56186	4.67698	4.76607	5.07019	0	-0.342754	-0.238635	0	0.0272233	0.116461	Synpcc7942_2481	0	0	-0.213936	-0.954842	0	-0.602702	0.204248
213	2567031	2567981	2567655	0	5.59736	4.12723	5.48289	5.58395	5.17429	5.5503	0	-0.439573	-0.0298112	0	-0.109923	-0.00872032		0	0	0	0	0	0	0
214	2587651	2588183	2588022	3.42693000000000e-318	5.68884	3.66087	3.83125	4.61954	6.46787	7.06374	0	-0.635946	-0.570317	0	0.48554	0.612682	Synpcc7942_2507	Dusk	0	-1.1936	-1.26894	0	1.17241	1.68375
215	2608194	2608475	2608322	4.17232e-199	9.96407	4.57028	3.99053	7.37148	8.32174	7.0405	0	-1.12445	-1.32016	0	0.174931	-0.0662754		0	0	0	0	0	0	0
216	2616512	2616816	2616617	3.92573e-51	4.25761	3.42275	3.68326	2.68638	3.84225	3.52815	0	-0.314885	-0.209059	0	0.516286	0.393248		0	0	0	0	0	0	0
217	2687906	2688911	2688077	2.28176e-221	3.93069	1.9985	2.25811	3.54323	4.316	4.12	0	-0.975865	-0.799666	0	0.284633	0.217581	Synpcc7942_2605	0	0	-0.746124	-1.14094	0	1.25022	0.925225
218	2692655	2693217	2692951	1.07109e-182	4.68618	3.50434	4.12548	4.37793	4.26527	4.18125	0	-0.419271	-0.18385	0	-0.0376139	-0.0663142		0	0	0	0	0	0	0

## Sheet: Legend
Column	Name	Description
A	RpaB peak #	Peak number in list of filtered peaks (see Materials and Methods for details). Some peaks have multiple gene targets and are thus listed multiple times for each separate gene target.
B	Start	First chromosomal location of peak
Column	End	Last chromosomal location of peak
D	Peak max location	Chromosomal location of highest normalized read count detected within peak in replicate experiment
E	Q-value	Minimum Q-value of peak in the respective replicate determined by the PeakSeq algorithm (Rozowsky et al 2009)
F-K	Enrichment over mock at peak max location	ChIP-seq data was normalized to the Mock pulldown using PeakSeq (Rozowsky et al 2009). Then, the ratio of the normalized read counts between the sample and the Mock was calculated at the peak max location
L-Q	Log2 normalized change in enrichment from original condition	The enrichment of the peak at each timepoint was divided by the enrichment at time 0 (8 hours since dawn in Low Light for High Light pulse, 8 hours since dawn in Clear Day for Shade pulse) and the Log2 of this ratio was taken.
R	Gene target of peak	Gene target of the peak (See Materials and Methods for details).
S	High confidence class of gene target	High confidence circadian class of gene target (See Materials and Methods and Figure 2 - source data for details). Options are Dusk, Dawn, or 0 if gene is not circadian.
T-Y	Log2 normalized change in gene target expression from original condition	The expression of the gene target of the peak at each timepoint in the respective replicate was divided by the expression at time 0 (8 hours since dawn in Low Light for High Light pulse, 8 hours since dawn in Clear Day for Shade pulse) and the Log2 of this ratio was taken.
