# Supplementary material for: Natural changes in light interact with circadian regulation at promoters to control gene expression in cyanobacteria
Source: eLife journal article supplement (doi:10.7554/elife.32032), 2017-12-14
Supplement: supp [file elife-32032-supp-v2.zip › elife_poa_e32032_Figure_7_source_data_1.xlsx]

## Sheet: Early cluster
			Scaled expression (range from 0 to 1)																														Scaled expression (range from 0 to 1)						Scaled expression (range from 0 to 1)
			Low Light								High Light pulse							Clear Day								Shade pulse							Constant Light (data from Markson, J.S., et. al 2013)						OX-D53E strain (rpaA-, kaiBC-, Ptrc::rpaA(D53E)) (data from Markson, J.S., et. al 2013)
											Minutes in High Light pulse				Minutes since return to Low Light											Minutes in High Light pulse				Minutes since return to Low Light									Hours post Induction						No induction
											0	15	30	60	15	30	60									0	15	30	60	15	30	60							0	0.5	2	3	6	12
			Hours since dawn								Hours since dawn							Hours since dawn								Hours since dawn							Hours in Constant Light						Hours in Constant Light						Hours in Constant Light
Gene ID	Gene name	Gene description	0.5	2	4	6	8	9	10	12	8	8.25	8.5	9	9.25	9.5	10	0.5	2	4	6	8	9	10	12	8	8.25	8.5	9	9.25	9.5	10	24	28	32	36	40	44	24	24.5	26	27	30	36	24	27	36
Early cluster average expression			0.0698117	0.103431	0.199955	0.389191	0.435813	0.316225	0.246722	0.211417	0.418698	0.193651	0.127946	0.151775	0.592395	0.535375	0.317719	0.080558	0.0367093	0.0526592	0.13078	0.300712	0.398061	0.372721	0.394484	0.284791	0.777716	0.962808	0.747857	0.305805	0.258328	0.241692	0.0602879	0.174771	0.953386	0.534218	0.485819	0.258476	0.0701369	0.109139	0.859024	0.762522	0.59131	0.475018	0.156833	0.139735	0.131435
Early cluster expression standard deviation			0.0897626	0.101985	0.177309	0.212638	0.20582	0.156376	0.137752	0.163602	0.192825	0.233167	0.167608	0.165814	0.219202	0.160476	0.157764	0.106186	0.0680731	0.0677845	0.136656	0.183691	0.213655	0.16347	0.198239	0.162909	0.170577	0.0857652	0.143425	0.216752	0.162884	0.154656	0.123005	0.205672	0.103172	0.357688	0.290033	0.158614	0.114918	0.130834	0.213697	0.239549	0.306864	0.244704	0.163057	0.154616	0.169324
Synpcc7942_2487		hypothetical protein	0.14137	0.190649	0.142567	0.363625	0.361786	0.403295	0.413573	0.516368	0.382232	0.154231	0.181904	0.207792	0.491006	0.362567	0.404208	0.146636	0.0346149	0	0.107259	0.388885	0.354884	0.349044	0.511944	0.241765	1	0.81635	0.574045	0.32435	0.187823	0.236386	0	0.348249	0.926328	0.782804	1	0.00271387	0.227875	0.300581	0.768525	0.717742	0.390145	1	0.12276	0	0.477174
Synpcc7942_2369	acrF	Hydrophobe/amphiphile efflux-1 HAE1	0.197042	0.199	0.446943	0.618585	0.399295	0.278895	0.21214	0.143568	0.387843	0.195463	0.0804789	0	0.247127	0.428553	0.252826	0.44386	0.0843718	0.108067	0.176433	0.363448	0.527505	0.494771	0.600854	0.373796	0.594086	1	0.905129	0.556177	0.476117	0.266032	0	0.444466	1	0.341228	0.0153985	0.202751	0	0.0225961	0.815784	1	0.504337	0.235158	0.269605	0.0665694	0.110173
Synpcc7942_1809	dfa1	flavoprotein	0.150828	0.128204	0.193668	0.243059	0.154501	0.115156	0.0415462	0.0549169	0.135484	0.0557409	0.0406254	0	0.216579	0.182105	0.0115911	0.369585	0.0378637	0.176216	0.254948	0.366855	0.474427	0.394026	0.513454	0.401312	1	0.762613	0.509298	0.199716	0.18564	0.155384	0.50795	1	0.51085	0	0.0694807	0.361521	0.225987	0	1	0.769815	0.29966	0.377872	0.518744	0.160386	0.586297
Synpcc7942_1125		putative CheA signal transduction histidine kinase, no good domain identification	0.0399903	0.269346	0.470921	0.606903	0.479468	0.319824	0.193861	0.166137	0.42896	0	0.00815588	0.0283608	0.730834	0.515251	0.224508	0.059223	0.0193561	0.115152	0.142451	0.319198	0.395037	0.307694	0.2184	0.358818	0.948567	1	0.673072	0.199355	0.14941	0.15658	0	0.365134	1	0.100967	0.444119	0.570083	0	0.106737	1	0.881579	0.153537	0.230969	0.365756	0.215475	0.265713
Synpcc7942_0309	ndhF4	NAD(P)H-quinone oxidoreductase subunit F	0.0923404	0.153597	0.244753	0.38131	0.342326	0.230332	0.166242	0.101275	0.290146	0.0254967	0.0119397	0.00901732	0.598641	0.532008	0.183926	0.0371402	0	0.00108573	0.0453475	0.120658	0.149466	0.185702	0.237176	0.139953	0.712074	1	0.655163	0.0707449	0.0964153	0.0660992	0	0.158009	1	0.172523	0.134964	0.333643	0.325842	0.396489	1	0.393706	0.355403	0.348226	0.126132	0.107882	0.0196894
Synpcc7942_2243	proA	Glutamate-5-semialdehyde dehydrogenase	0.333572	0.26803	0.405023	0.632321	0.488819	0.319051	0.130141	0.187062	0.5145	0.199964	0.125402	0.168002	0.807596	0.587419	0.148303	0.136643	0.0793587	0	0.103812	0.198275	0.270462	0.136205	0.374069	0.183638	0.97829	1	0.779875	0.172189	0.198301	0.153732	0	0.115854	1	0.328083	0.366139	0.403338	0.173877	0.465101	1	0.565175	0.114831	0.214621	0.385749	0.273156	0
Synpcc7942_0236		cyclic nucleotide-binding domain (cNMP-BD) protein	0.125556	0.190283	0.255281	0.325366	0.253806	0.165417	0.131522	0.0996029	0.23887	0.0040641	0	0.0146323	0.601558	0.541598	0.165726	0.100465	0.0337868	0.0468452	0.0631917	0.136807	0.167121	0.175217	0.541339	0.161641	1	0.920056	0.782374	0.13518	0.0881482	0.0634846	0.126582	0.325662	1	0	0.178258	0.562215	0.00740274	0	1	0.253753	0.171748	0.121271	0.347632	0.195914	0.167801
Synpcc7942_2476		hypothetical protein	0.0499731	0.257717	0.243089	0.381538	0.47889	0.369615	0.34822	0.231867	0.517517	0.121403	0.198805	0.213537	0.960638	0.840579	0.514781	0	0.0925583	0.0946633	0.138646	0.322524	0.326643	0.446661	0.250097	0.288508	0.917336	1	0.819206	0.223646	0.24238	0.25065	0.00222518	0.510177	1	0	0.414012	0.248815	0.176686	0.419933	0.942091	0.629766	1	0.404143	0.153393	0.412066	0
Synpcc7942_1275		hypothetical protein	0.0297596	0.116003	0.220279	0.630252	0.5413	0.26659	0.189744	0.0740495	0.529754	0.259309	0.157744	0.188328	0.576823	0.545508	0.245846	0.254201	0.152595	0.109161	0.233821	0.59981	0.788687	0.534551	0	0.488725	0.591886	1	0.727554	0.487428	0.381164	0.308335	0.0525306	0	1	0.00670039	0.30159	0.298978	0.201815	0.121553	1	0.9147	0.484511	0.220938	0	0.131871	0.102701
Synpcc7942_0577		hypothetical protein	0.131387	0.441007	0.880035	1	0.826944	0.367437	0.309183	0.256588	0.805149	0.0181764	0.0426366	0.251262	0.83606	0.819118	0.597272	0	0.243169	0.198991	0.343051	0.44276	0.397901	0.343576	0.044115	0.399861	0.871466	0.962636	0.624157	0.3319	0.271276	0.199626	0.0861045	0.0948522	1	0	0.220361	0.483048	0	0.216789	0.717626	0.139903	0.564147	1	0.247736	0.355494	0.369982
Synpcc7942_2367		hypothetical protein	0.086308	0.146161	0.18023	0.307928	0.323612	0.190812	0.153079	0.126191	0.330574	0.0346109	0.0181145	0.0213898	0.475384	0.470916	0.194049	0.0707613	0	0.0193351	0.0414184	0.134771	0.191191	0.226678	0.478052	0.127854	0.821039	1	0.778623	0.152927	0.0944793	0.0794346	0	0.119263	1	0.352783	0.0690315	0.341844	0	0.0114425	1	0.504483	0.353923	0.32699	0.415232	0.220305	0.0939436
Synpcc7942_1827		hypothetical protein	0	0.112781	0.428606	0.736398	0.625135	0.447734	0.343037	0.310417	0.547459	0.276551	0.192573	0.2032	0.415709	0.524171	0.419173	0.00561592	0.0442866	0.206608	0.336166	0.55673	0.633114	0.548362	0.957171	0.527336	0.89434	0.975699	1	0.457655	0.354995	0.262539	0	0.214937	1	0.0859098	0.303878	0.180545	0	0.00247097	1	0.704238	0.284493	0.172445	0.0319935	0.0870533	0.130646
Synpcc7942_0595		hypothetical protein	0.0697823	0.0431298	0.163632	0.443806	0.393352	0.224806	0.128072	0.118418	0.380281	0.107659	0.074795	0.0884906	0.389081	0.464521	0.187217	0.0734851	0	0.0360217	0.100284	0.377002	0.468925	0.339933	0.271889	0.389365	0.746702	1	0.572774	0.263929	0.193265	0.16627	0	0.357179	1	0.31672	0.534082	0.397372	0	0.0324523	1	0.790441	0.357214	0.261691	0.128622	0.109832	0.193226
Synpcc7942_0421		hypothetical protein	0	0.197946	0.315949	0.473603	0.488456	0.486851	0.340039	0.20401	0.444528	0.103484	0.164156	0.210973	0.546071	0.537253	0.43614	0.109708	0.298632	0.218837	0.323633	0.584834	0.620488	0.561104	0.64804	0.496953	0.936283	0.970281	1	0.363641	0.423859	0.349506	0.217169	0.438772	1	0.436477	0.205043	0	0	0.208602	1	0.678653	0.654906	0.223436	0.334323	0.51496	0.262461
Synpcc7942_1587		integral membrane protein-like	0.0482223	0.174481	0.213688	0.313706	0.362851	0.285506	0.242523	0.186463	0.343669	0	0.0115759	0.030646	0.576039	0.489604	0.259897	0.0471151	0.0490951	0.0563201	0.0828314	0.172655	0.264065	0.317852	0.622084	0.164879	0.831759	1	0.834516	0.114046	0.138855	0.162596	0	0.194646	1	0.290457	0.378825	0.450618	0.182245	0	1	0.625458	0.290529	0.567683	0.580519	0.442075	0.470513
Synpcc7942_0307	napA, nha5, nhaS5	Na+/H+ antiporter	0.101536	0.0976481	0.222385	0.373676	0.426877	0.301111	0.230532	0.149869	0.378491	0.0568511	0.0191204	0	0.500501	0.435188	0.240546	0.0875062	0.00270306	0.0041477	0.0500879	0.110257	0.234754	0.271329	0.283895	0.15337	0.708167	1	0.755875	0.208805	0.156986	0.159121	0.447733	0	1	0.852866	0.469851	0.386924	0.501229	0.207723	1	0.654076	0.365164	0.331699	0.330268	0	0.538376
Synpcc7942_0096		hypothetical protein	0.0154725	0.0540668	0.094886	0.188604	0.194703	0.163223	0.129156	0.118167	0.205497	0.00406112	0.0145665	0.0415783	0.693455	0.773786	0.313985	0.014719	0	0.00301948	0.0240626	0.105248	0.154935	0.207482	0.40217	0.134202	0.715362	1	0.789684	0.0729892	0.100228	0.0769086	0.00483388	0	1	0.514401	0.0931163	0.04171	0	0.20447	1	0.576651	0.184033	0.299135	0.126749	0.132494	0.0865948
Synpcc7942_0686		FO synthase subunit 2	0.0739637	0	0.058262	0.233337	0.36851	0.213633	0.134923	0.0907915	0.360343	0.406435	0.075393	0.0906613	0.289867	0.316139	0.168027	0.0454348	0.013568	0.00175866	0.0318059	0.167308	0.28241	0.276595	0.290143	0.171951	0.684803	1	0.775063	0.255022	0.197973	0.105518	0	0.0431515	1	0.419002	0.405552	0.102528	0.051506	0.0469717	1	0.465272	0.365387	0.298593	0.014975	0.021544	0
Synpcc7942_1656	katG, cpx	catalase/peroxidase HPI	0.00410032	0.0627543	0.11079	0.255684	0.302494	0.263906	0.238798	0.169289	0.313112	0.0306295	0.0283158	0.088395	0.831436	0.458915	0.24713	0.00179395	0	0.0065382	0.0222868	0.0831209	0.133342	0.133897	0.527186	0.0683522	0.808212	1	0.716556	0.056105	0.0418796	0.10289	0	0.116691	0.868358	1	0.631874	0.156717	0	0.0533289	1	0.931606	0.813195	0.653401	0.177331	0.120932	0.147133
Synpcc7942_0668		hypothetical protein	0.0345653	0.0710848	0.164221	0.196234	0.397534	0.257993	0.203941	0.230722	0.362677	0.097744	0.0629717	0.100754	0.470424	0.359562	0.195138	0.0071798	0.0100399	0	0.0307248	0.137879	0.204084	0.23924	0.304433	0.128747	0.429293	1	0.502746	0.11536	0.106361	0.158021	0.242982	0	0.810441	1	0.940251	0.00231099	0.114845	0.191244	1	0.958054	0.989071	0.553092	0.266906	0.556894	0.0120355
Synpcc7942_2603	ctaD	Cytochrome-c oxidase	0.00514436	0.00693724	0.0326975	0.107545	0.169361	0.134109	0.112553	0.0705918	0.157644	0.0702136	0.0581597	0.105056	0.89654	0.786054	0.328837	0.0124376	0	0.00506525	0.0373477	0.114753	0.226598	0.289138	0.483698	0.128554	0.748399	1	0.718342	0.167876	0.183396	0.249051	0	0.132976	0.883346	1	0.512732	0.170318	0.000461109	0.0206906	0.330464	0.955852	1	0.777293	0.0295137	0.00400148	0.0237043
Synpcc7942_1557	rpoD6	principal RNA polymerase sigma factor SigA	0.0133404	0.0258376	0.10534	0.460287	0.460233	0.244477	0.148134	0.134728	0.418227	0.135444	0.120199	0.18761	0.521475	0.295208	0.141672	0.0333827	0	0.0181639	0.104842	0.302527	0.374248	0.255056	0.0833569	0.302774	1	0.665611	0.360665	0.246304	0.159693	0.1669	0	0.066293	1	0.352161	0.475655	0.241274	0.00274197	0.0483335	1	0.755159	0.438644	0.449454	0.011871	0	0.00534335
Synpcc7942_0680		C-5 sterol desaturase	0.00566822	0.02629	0.0544641	0.252814	0.312273	0.202109	0.188117	0.0952092	0.322265	0.0719248	0.0751744	0.0984056	0.748551	0.564123	0.317216	0.0260722	0	0.00488826	0.0477334	0.225687	0.297912	0.30747	0.240118	0.189651	0.765561	1	0.848971	0.203947	0.227151	0.196852	0.165477	0	1	0.60819	0.421141	0.301492	0.0022118	0.0662194	0.667223	1	0.826957	0.48471	0.0244737	0.0604897	0.0148713
Synpcc7942_1108	Hbs or HU-like	bacterial nucleoid protein Hbs	0.00409514	0.0746929	0.162409	0.224064	0.250292	0.22675	0.193766	0.130389	0.300171	0.0474193	0.00753837	0.00785314	0.270615	0.365554	0.200055	0.0414069	0	0.0339971	0.0558304	0.163264	0.22219	0.23077	0.730105	0.143211	0.577658	1	0.736242	0.250145	0.128353	0.152038	0	0.234987	1	0.849167	0.648803	0.454868	0.0442698	0	1	0.975831	0.302875	0.329548	0.0799363	0.150788	0.253173
Synpcc7942_0383		hypothetical protein	0.0155525	0.0876605	0.232477	0.378104	0.33089	0.282374	0.328071	0.156068	0.345129	0.0762376	0.0877129	0.157342	0.656492	0.591939	0.411364	0	0.0283942	0.0314996	0.103448	0.251217	0.318812	0.350371	0.334774	0.292707	0.622647	1	0.6289	0.231249	0.222143	0.263253	0	0.157124	1	0.965409	0.597947	0.209761	0	0.0896537	0.755631	0.924349	1	0.755302	0.131794	0.231786	0.019619
Synpcc7942_2604	ctaE	cytochrome c oxidase subunit III	0.000839549	0.00378392	0.0237003	0.091888	0.158316	0.142613	0.116451	0.0394661	0.176197	0.0742994	0.0498973	0.0907817	0.806888	0.701727	0.312608	0.0159552	0	0.00587347	0.028925	0.106637	0.239407	0.322519	0.470813	0.13009	0.704359	1	0.748495	0.167712	0.200305	0.274392	0.0516047	0	1	0.950197	0.383142	0.0841019	0.0262256	0	0.255831	1	0.933264	0.651429	0.0525584	0.0234752	0.0177282
Synpcc7942_2602	ctaC	cytochrome c oxidase subunit II	0.00464451	0.00761854	0.0223703	0.0971643	0.144095	0.1266	0.0985691	0.0700356	0.147738	0.0476049	0.0450467	0.0816801	0.953847	0.781419	0.285311	0.00644804	0	0.00409301	0.0266152	0.100282	0.198481	0.249853	0.582653	0.0987021	0.942174	1	0.710483	0.117518	0.137333	0.157167	0	0.0645708	0.723698	1	0.327984	0.26493	0.000878572	0.00974398	0.32318	0.915306	1	0.750403	0.0210853	0	0.0152957
Synpcc7942_0687		hypothetical protein	0.386956	0.0352415	0.0916386	0.385196	0.675016	0.534053	0.310555	0.292675	0.524825	1	0.205032	0.183497	0.323762	0.514167	0.348034	0.267048	0	0.0281806	0.0184226	0.210067	0.339605	0.430243	0.292302	0.207996	0.374458	0.713937	0.889091	0.46335	0.462561	0.193051	0.0166048	0	1	0.369073	0.453919	0.0700929	0.0573734	0.0822542	1	0.511403	0.336782	0.217367	0.0423787	0.00874705	0.0791717
Synpcc7942_0199		hypothetical protein	0.0365809	0.00360416	0.0831921	0.379619	0.586707	0.449188	0.342537	0.309426	0.511681	0.504466	0.26409	0.212931	0.460977	0.557511	0.425482	0.0708402	0	0.0122097	0.150134	0.530523	0.767388	0.777899	0.336467	0.466215	0.602683	1	0.916365	0.582819	0.530947	0.520866	0	0.0983281	0.808808	0.679035	1	0.0768756	0.0289326	0.0331817	0.721188	1	0.905501	0.440353	0.0392024	0.042437	0.0333952
Synpcc7942_0316	digD, orf7.5	hypothetical protein	0.00371345	0.0175853	0.0294518	0.131615	0.306104	0.232433	0.206638	0.201785	0.288618	0.109058	0.0506931	0.0849852	0.411196	0.315535	0.217017	0	0.0335008	0.0363931	0.0754067	0.199265	0.297782	0.333266	0.304334	0.172519	0.90096	1	0.584749	0.130608	0.13812	0.141897	0.0284698	0	0.92737	1	0.890278	0.263266	0	0.069098	0.981874	1	0.980105	0.769903	0.0322174	0.025014	0.0458785
Synpcc7942_0201	ccoO	hypothetical protein	0.0394607	0	0.0722279	0.314191	0.470803	0.351898	0.296625	0.291664	0.486686	0.298674	0.182944	0.208621	0.486325	0.485895	0.366006	0.0328258	0.00928112	0.0210231	0.144475	0.396971	0.644206	0.626581	0.2625	0.393879	0.617081	1	0.769007	0.460253	0.40674	0.399368	0	0.158516	1	0.702139	0.767744	0.223404	0.0118266	0.023835	0.697552	1	0.869354	0.564355	0	0.00867669	0.0322493
Synpcc7942_1804		hypothetical protein	0	0.112453	0.442818	0.902209	0.880911	0.775033	0.679895	0.728349	0.881876	0.774055	0.918402	0.856547	0.952286	0.622015	0.675203	0.0024562	0.0176507	0.179864	0.711982	0.813641	0.820308	0.599718	0.610475	0.795736	1	0.927572	0.865991	0.967242	0.667436	0.702459	0	0.141018	1	0.645868	0.776467	0.457061	0.0354976	0.28338	1	0.495315	0.790686	0.943656	0.0602863	0.15958	0
Synpcc7942_0556	srrB	two component transcriptional regulator, winged helix family	0.0166597	0.00540171	0.0272053	0.292344	0.679205	0.466056	0.347006	0.278137	0.606668	0.341988	0.219867	0.253371	0.63559	0.568637	0.477503	0.0198471	0	0.00566592	0.0587167	0.384458	0.586766	0.507594	0.361343	0.346999	0.75498	1	0.873122	0.477039	0.394165	0.465991	0.021458	0	1	0.748199	0.624211	0.139777	0.00466924	0.00741252	0.688625	1	0.974686	0.653793	0	0.00964	0.00576553
Synpcc7942_0198	ndbC	type 2 NADH dehydrogenase	0.0554968	0.00602154	0.079206	0.417172	0.618595	0.511245	0.36031	0.32699	0.633812	0.556346	0.257611	0.277844	0.407269	0.623796	0.465033	0.112137	0	0.0303336	0.169172	0.473709	0.737274	0.691614	0.333532	0.441092	0.557627	1	0.932266	0.629762	0.610796	0.517499	0	0.216119	1	0.930156	0.947821	0.24408	0.0267158	0.00830955	0.681601	1	0.818747	0.414018	0	0.0109522	0.0138324
Synpcc7942_1960		hypothetical protein	0.129489	0.0330748	0.0840104	0.481533	1	0.717738	0.625779	0.738291	0.955806	0.518166	0.426453	0.548576	0.947197	0.779793	0.738531	0.167601	0	0.0230555	0.191998	0.562907	0.821729	0.583234	0.303944	0.456524	0.86182	0.98352	0.816602	0.84619	0.486772	0.579323	0.13835	0	0.909328	0.897125	1	0.31767	0.0236762	0.0692577	0.718628	1	0.822019	0.582669	0.0194199	0.0302267	0.00573454

## Sheet: Middle cluster
			Scaled expression (range from 0 to 1)																														Scaled expression (range from 0 to 1)						Scaled expression (range from 0 to 1)
			Low Light								High Light pulse							Clear Day								Shade pulse							Constant Light (data from Markson, J.S., et. al 2013)						OX-D53E strain (rpaA-, kaiBC-, Ptrc::rpaA(D53E)) (data from Markson, J.S., et. al 2013)
											Minutes in High Light pulse				Minutes since return to Low Light											Minutes in High Light pulse				Minutes since return to Low Light									Hours post Induction						No induction
											0	15	30	60	15	30	60									0	15	30	60	15	30	60							0	0.5	2	3	6	12
			Hours since dawn								Hours since dawn							Hours since dawn								Hours since dawn							Hours in Constant Light						Hours in Constant Light						Hours in Constant Light
Gene ID	Gene name	Gene description	0.5	2	4	6	8	9	10	12	8	8.25	8.5	9	9.25	9.5	10	0.5	2	4	6	8	9	10	12	8	8.25	8.5	9	9.25	9.5	10	24	28	32	36	40	44	24	24.5	26	27	30	36	24	27	36
Middle cluster average expression			0.0233966	0.0592048	0.0868119	0.181681	0.346172	0.370979	0.361832	0.292756	0.308704	0.108289	0.0849451	0.0974633	0.472751	0.515115	0.401113	0.0508381	0.0171238	0.0220156	0.0508581	0.165996	0.271925	0.380574	0.958317	0.153954	0.55245	0.720609	0.752354	0.238865	0.223717	0.256063	0.0537236	0.101848	0.642913	0.938826	0.582169	0.138011	0.0565821	0.0771201	0.701164	0.81718	0.787914	0.639861	0.117671	0.109435	0.101744
Middle cluster expression standard deviation			0.0403581	0.0785865	0.0924429	0.121102	0.145977	0.144858	0.136961	0.141087	0.12491	0.0976447	0.07925	0.0765989	0.185992	0.188821	0.160108	0.0996769	0.0456249	0.0458291	0.047556	0.104547	0.141527	0.160479	0.0833163	0.0880834	0.215575	0.18011	0.157084	0.135182	0.127831	0.129956	0.099674	0.183637	0.248618	0.168423	0.186071	0.136643	0.13077	0.125052	0.24698	0.212067	0.227622	0.202701	0.131558	0.150641	0.131636
Synpcc7942_0223		hypothetical protein	0	0.564627	0.618032	0.705234	0.511649	0.537431	0.386333	0.232732	0.262803	0.125679	0.228295	0.180066	0.393366	0.474208	0.277081	0.00455341	0.301828	0.304319	0.183792	0.139838	0.248464	0.218308	1	0.3748	0.575345	0.330626	0.375128	0.0845766	0.114253	0.144919	0.33667	0.323135	1	0	0.558612	0.321208	0.89509	0.547776	0.936181	0.709618	0.787356	0.497932	0.617098	1	0.587029
Synpcc7942_2500		hypothetical protein	0.0375561	0.0724901	0.154277	0.292384	0.366035	0.347711	0.300989	0.257133	0.388296	0.0841198	0.0607706	0.0837862	0.704072	0.654446	0.461008	0.0148536	0	0.0167233	0.0543093	0.172277	0.276464	0.325569	1	0.186932	0.946444	0.935687	0.938101	0.209999	0.188585	0.185086	0	0.051451	1	0.702851	0.464466	0.198882	0	0.0411613	1	0.796289	0.674532	0.569919	0.151042	0.0190507	0.0282646
Synpcc7942_1466	cysM	cysteine synthase	0.0392319	0.0450861	0.00907442	0.173445	0.382772	0.538891	0.542757	0.459326	0.420452	0.206843	0.115276	0.137907	0.748202	0.887242	0.599786	0.03572	0.0881736	0	0.0153891	0.123309	0.306067	0.562063	1	0.126014	0.621803	0.704481	0.840497	0.227528	0.422046	0.472002	0	0.295631	0.243622	0.970261	1	0.379261	0.478921	0.431985	0.549673	0.792507	1	0.934048	0.191164	0.141677	0
Synpcc7942_0781	ppsA, pps	phosphoenolpyruvate synthase	0.0026229	0.0232615	0.0358602	0.070433	0.0957027	0.0916177	0.0773164	0.058488	0.0798143	0.000505086	0.000558999	0.00306359	0.377376	0.292713	0.104852	0.00201638	0	0.00210322	0.00615438	0.0187481	0.0400594	0.0814348	1	0.0259202	0.725757	0.766621	0.624415	0.0169584	0.0162226	0.0274616	0	0.284015	1	0.900003	0.634003	0.308577	0	0.00881399	1	0.306604	0.20218	0.32956	0.269931	0.191009	0.111619
Synpcc7942_0267	gidB	glucose-inhibited division protein B	0.0291662	0.0717703	0.0454504	0.0658842	0.1176	0.0952286	0.0924373	0.0671151	0.101457	0	0.00167232	0.00540448	0.198605	0.186276	0.080509	0.0339778	0.0107583	0.00514843	0.00652811	0.0236256	0.0571988	0.0890172	1	0.030897	0.492876	0.639242	0.570002	0.0309238	0.0299248	0.0413028	0.167977	0	1	0.760522	0.453239	0.33545	0	0.142909	1	0.898234	0.652678	0.494614	0.153443	0.14667	0.0763824
Synpcc7942_2609		hypothetical protein	0	0.105772	0.200447	0.365167	0.431254	0.43868	0.468226	0.411835	0.386045	0.0657039	0.016436	0.0744734	0.80454	1	0.769854	0.033591	0.0185246	0.0841658	0.13739	0.282644	0.42813	0.554352	0.896176	0.27752	0.747146	0.888374	0.999683	0.432253	0.256091	0.283187	0.211914	0.302498	1	0.99697	0.400054	0	0.0337485	0	1	0.982218	0.313202	0.364256	0.311956	0.229933	0.251171
Synpcc7942_2499		Band 7 protein	0.0311842	0.0613586	0.158424	0.311199	0.346137	0.342815	0.286318	0.22921	0.334582	0.0674129	0.0464338	0.0552417	0.402325	0.466371	0.336502	0.00835901	0	0.0258382	0.0542974	0.190736	0.279121	0.356893	0.852606	0.182551	0.718349	0.93291	1	0.224164	0.189116	0.177148	0	0.0107589	1	0.768504	0.567315	0.117641	0.00627169	0	1	0.867974	0.681723	0.385253	0.0405556	0.0255894	0.135006
Synpcc7942_1976	ndhD, ndhD1	NAD(P)H-quinone oxidoreductase subunit D	0.0159015	0.0845091	0.206434	0.367657	0.466666	0.505381	0.446901	0.398918	0.408768	0.116289	0.0919704	0.113899	0.727444	0.671773	0.448366	0	0.00279326	0.0203212	0.0692007	0.243506	0.367008	0.487106	0.84313	0.240866	1	0.982873	0.926207	0.265548	0.232639	0.284842	0	0.294698	0.873808	1	0.695856	0.211546	0	0.0993937	1	0.935088	0.815756	0.634382	0.301014	0.200588	0.15542
Synpcc7942_1567		possible ribosomal protein L36	0.00560978	0.00744745	0.0177878	0.120769	0.365161	0.347398	0.319901	0.201523	0.291991	0.0204536	0.0164784	0.0349318	0.620049	0.47604	0.270514	0.00307067	0	0.00471045	0.0300935	0.110941	0.165755	0.309406	1	0.112322	0.684972	0.850079	0.816751	0.102028	0.0869859	0.129889	0	0.00151722	0.838927	1	0.656223	0.088393	0.0942666	0.0590356	1	0.780303	0.626149	0.524292	0.0190993	0.0312919	0.010501
Synpcc7942_1460		hypothetical protein	0.12824	0.0683177	0.0809045	0.180936	0.326051	0.246967	0.25295	0.269724	0.28328	0.0386991	0.00627745	0.00354214	0.317066	0.286225	0.241548	0.222248	0	0.00931128	0.0342507	0.134723	0.194045	0.294581	1	0.121956	0.577977	0.768345	0.679825	0.223969	0.110535	0.149076	0	0.135865	1	0.526618	0.447753	0.164254	0	0.0821582	1	0.838577	0.736322	0.46155	0.0525378	0.136198	0.216473
Synpcc7942_1445		hypothetical protein	0	0.0629473	0.185823	0.312718	0.443578	0.445001	0.505234	0.456509	0.36542	0.0689785	0.0140432	0.0222864	0.414184	0.702647	0.667676	0.0555111	0.00279853	0.0344779	0.0797262	0.203313	0.306805	0.474207	1	0.18324	0.364083	0.746365	0.930913	0.407783	0.239788	0.322204	0.0285054	0.149126	1	0.824774	0.394078	0	0.082574	0.00700678	1	0.580263	0.60283	0.583097	0.172027	0.154232	0.248659
Synpcc7942_0215		hypothetical protein	0.0492411	0.17295	0.149367	0.239057	0.300401	0.2973	0.262462	0.286497	0.279524	0	0.016898	0.0368586	0.690214	0.58312	0.291603	0.0117208	0.0196413	0.0137088	0.0288741	0.0638795	0.111791	0.191043	1	0.0779979	0.648164	0.593448	0.671471	0.0378076	0.0720332	0.0389279	0.0383091	0	0.499953	1	0.32996	0.112282	0.308177	0.334449	0.967836	0.46192	0.779749	1	0.446227	0.295735	0
Synpcc7942_1506		hypothetical protein	0.000129764	0.0281798	0.0403883	0.107837	0.190601	0.162137	0.14311	0.107714	0.162945	0.0264804	0.0146027	0.025503	0.338629	0.279575	0.149071	0.0250129	0	0.00117427	0.0186824	0.137937	0.248276	0.289233	0.935022	0.130934	0.931301	1	0.880661	0.148701	0.150585	0.174001	0.0370607	0	0.946542	1	0.801398	0.27418	0.007659	0.000247563	0.727619	1	0.899254	0.503157	0.0256554	0.0282245	0.0491808
Synpcc7942_1397		hypothetical protein	0.00784505	0.0665095	0.137256	0.328973	0.432868	0.351636	0.30688	0.239853	0.420902	0.000106556	0.00339527	0.0208645	0.502334	0.516835	0.317162	0.00614634	0	0.0169335	0.0545439	0.184276	0.301061	0.390313	1	0.19315	0.817777	0.945296	0.775207	0.128929	0.117573	0.13655	0	0.149571	1	0.664245	0.487123	0.243398	0	0.010684	1	0.592738	0.238534	0.423053	0.117146	0.0732546	0.111279
Synpcc7942_0770		hypothetical protein	0.0211852	0.0433138	0.0954037	0.160448	0.381343	0.387571	0.386537	0.274564	0.330724	0.0232235	0.00968629	0.0154938	0.382069	0.591519	0.494237	0.0308631	0	0.00622762	0.015981	0.0525019	0.131457	0.287858	0.976321	0.0730568	0.359315	0.772293	1	0.167442	0.138793	0.205863	0	0.113768	0.687957	1	0.550917	0.0478227	0.111263	0	1	0.649511	0.944517	0.430457	0.165208	0.025922	0.0806695
Synpcc7942_2498		Band 7 protein	0.045594	0.0742431	0.18148	0.314357	0.395257	0.375466	0.323488	0.265315	0.359169	0.0793239	0.053613	0.0542331	0.4619	0.566424	0.386286	0.00280216	0	0.023231	0.0582564	0.161353	0.252016	0.342708	0.841047	0.164924	0.722737	0.991387	1	0.197026	0.162289	0.187706	0	0.173927	1	0.615942	0.494692	0.087684	0	0.0247395	1	0.942752	0.757134	0.496553	0.150028	0.040039	0.221997
Synpcc7942_1446		hypothetical protein	0.00357628	0.0702875	0.16925	0.241054	0.335734	0.361326	0.3828	0.331115	0.331167	0.0212905	0	0.0228158	0.329782	0.504174	0.504882	0.0308674	0.00857187	0.0376982	0.0587049	0.165349	0.239533	0.348554	1	0.13722	0.384729	0.657606	0.693133	0.267919	0.141142	0.230339	0	0.334238	0.843037	1	0.458368	0.144535	0.122696	0	1	0.606327	0.480901	0.520049	0.242321	0.323683	0.14876
Synpcc7942_1914		hypothetical protein	0.0997558	0.0615314	0.0810428	0.186071	0.295098	0.347891	0.33642	0.2752	0.268046	0.0113232	0.00438843	0.00640826	0.445479	0.452781	0.307619	0.104342	0	0.00902253	0.0250713	0.0783542	0.122335	0.239694	1	0.0586588	0.462921	0.643789	0.714814	0.12163	0.129192	0.121904	0	0.297176	0.924713	1	0.844118	0.380163	0	0.250145	1	0.781899	0.308402	0.218871	0.430552	0.165976	0.018524
Synpcc7942_0571		sugar (Glycoside-Pentoside-Hexuronide) transporter	0.0423344	0.0577112	0.206418	0.263131	0.271463	0.3547	0.375046	0.24502	0.243104	0.0588841	0.0337413	0.0515874	0.32548	0.41324	0.433092	0.0976306	0	0.0205707	0.052656	0.122579	0.188159	0.288825	1	0.13327	0.223455	0.490418	0.61884	0.304914	0.148496	0.223815	0	0.115796	0.463479	1	0.390289	0.0248462	0	0.0289143	1	0.922047	0.782845	0.492417	0.166445	0.225429	0.11549
Synpcc7942_2185		hypothetical protein	0.029093	0.0343136	0.049861	0.133289	0.42079	0.350455	0.321382	0.31378	0.42985	0.149934	0.0536401	0.0941353	0.477905	0.451918	0.35882	0.0390758	0	0.0164525	0.0091242	0.183644	0.324841	0.324369	1	0.178106	0.733537	0.962205	0.94477	0.292215	0.237845	0.296493	0.259619	0.0986298	0.769304	1	0.803338	0	0.00461161	0.0204204	0.665043	1	0.880839	0.37335	0.00813528	0.0147117	0.00521685
Synpcc7942_2200		hypothetical protein	0.0707088	0.070302	0.0423632	0.095289	0.242435	0.305566	0.236451	0.262064	0.187588	0.0208936	0.0368929	0.0499276	0.300244	0.428223	0.301136	0.0597859	0.0175578	0.000176347	0	0.0703373	0.102861	0.228401	1	0.0388871	0.33825	0.489298	0.633396	0.0883812	0.0730916	0.0816508	0.284312	0.351372	0.616938	1	0.788312	0	0.110958	0.479012	1	0.490625	0.618695	0.616542	0.068129	0.0952172	0
Synpcc7942_2002		hypothetical protein	0.0881514	0.0910892	0.144266	0.257232	0.490288	0.491014	0.438107	0.479718	0.386858	0.202365	0.182591	0.191586	0.580016	0.571413	0.448421	0.131304	0	0.052446	0.115646	0.390667	0.464637	0.575773	1	0.325101	0.722286	0.792099	0.850814	0.429548	0.366836	0.442074	0.250403	0	1	0.814282	0.855264	0.521828	0.243324	0.145482	0.595804	1	0.931694	0.659924	0	0.0462204	0.0900128
Synpcc7942_2352	lrtA	sigma 54 modulation protein / SSU ribosomal protein S30P	0.00342411	0.0588585	0.0715307	0.101037	0.143153	0.14022	0.137301	0.0861791	0.139887	0	0.000526147	0.00351265	0.422403	0.473969	0.217112	0.00245151	0.00421859	0.00674087	0.013814	0.0367936	0.0810938	0.173326	0.962008	0.0471868	0.947675	1	0.747833	0.0373412	0.0317327	0.073234	0	0.36131	0.806494	1	0.520138	0.0969578	0	0.0357055	1	0.241088	0.120155	0.475533	0.49505	0.41482	0.288378
Synpcc7942_1572		dehydrogenase subunit-like protein	0.00693863	0.00382417	0.0116069	0.062638	0.267249	0.334126	0.329293	0.296035	0.215631	0.0760427	0.0487871	0.0468212	0.403208	0.450208	0.327921	0.0134338	0	0.000443015	0.0109365	0.0843025	0.177361	0.321535	0.947278	0.0818598	0.349286	0.669374	1	0.29319	0.229637	0.238035	0.0460377	0	0.426544	1	0.599209	0.0811971	0.00173638	0.0247337	0.504066	0.933578	1	0.701713	0.0159877	0.00327343	0.0378384
Synpcc7942_0391		hypothetical protein	0.00541884	0.0284396	0.0678341	0.169978	0.28872	0.341711	0.323355	0.263248	0.226245	0.0492929	0.0353154	0.0463265	0.419462	0.49428	0.33404	0.0320384	0	0.012317	0.0480959	0.15306	0.24432	0.343815	1	0.141595	0.506157	0.733951	0.731632	0.166833	0.168531	0.212328	0	0.0268463	0.488566	1	0.615726	0.0745298	0	0.0206682	0.919552	1	0.794861	0.766146	0.0937857	0.125281	0.146567
Synpcc7942_2297	tal	transaldolase/EF-hand domain-containing protein	0.0310785	0.0394687	0.0596969	0.181876	0.376018	0.363482	0.335004	0.250471	0.336631	0.130347	0.0823422	0.0889269	0.510591	0.57659	0.406925	0.0444822	0	0.0112015	0.0433299	0.225883	0.371669	0.445765	0.904048	0.207482	0.762816	1	0.948379	0.305431	0.326895	0.287191	0	0.0799536	0.957113	1	0.699634	0.138898	0	0.00033983	0.857982	1	0.587995	0.432939	0.0199697	0.0151633	0.00957569
Synpcc7942_1115		hypothetical protein	0.139625	0.242141	0.178586	0.212861	0.312413	0.423804	0.133479	0.350237	0.254967	0.00395881	0.0937046	0.0742725	0.420305	0.323164	0.194081	0	0.120491	0.0496142	0.119207	0.197385	0.237232	0.412277	1	0.155329	0.8513	0.51785	0.721367	0.141077	0.16654	0.211147	0.234408	0	1	0.763721	0.0484269	0.652234	0.128437	0.551837	0.530885	0.432295	0.265738	1	0.156217	0.32307	0
Synpcc7942_1646		hypothetical protein	0.00691303	0.0832008	0.0983593	0.141446	0.264843	0.303223	0.283726	0.250401	0.243431	0.0238243	0.0314534	0.0535141	0.535497	0.426115	0.294533	0	0.00200626	0.00626003	0.0260942	0.131094	0.222646	0.313149	1	0.12369	0.678138	0.764349	0.695762	0.108777	0.129457	0.170906	0	0.0698464	0.468984	1	0.574754	0.116188	0	0.0609194	0.630131	1	0.9772	0.976963	0.167553	0.143482	0.0751656
Synpcc7942_2384	nifJ	Pyruvate:ferredoxin (flavodoxin) oxidoreductase	0.0054979	0.00363476	0.0102079	0.0434935	0.155147	0.197966	0.188269	0.164703	0.13474	0.0273749	0.0204832	0.028071	0.346729	0.349413	0.228826	0.00536024	0	0.00303931	0.0109319	0.0568778	0.105498	0.189816	1	0.0561886	0.335094	0.504609	0.583297	0.0715088	0.0748235	0.0996047	0.00138371	0	0.447898	1	0.684391	0.0977208	0.0315894	0.0778835	0.972973	0.954	0.993673	1	0.0539578	0.0222337	0.0264409
Synpcc7942_1195		hypothetical protein	0.00211114	0.0343053	0.0233544	0.162325	0.29621	0.417055	0.448705	0.428405	0.320563	0.110022	0.152174	0.131954	0.650115	0.516812	0.37639	0.119562	0	0.00944539	0.0497403	0.241313	0.376314	0.439756	1	0.197089	0.780168	0.721028	0.764884	0.242068	0.277696	0.350609	0.0508032	0.13594	0.641263	1	0.421032	0	0.031835	0.105282	0.470599	0.607177	1	0.64414	0.0400774	0.02328	0.153442
Synpcc7942_1573		3-oxoacyl-(acyl-carrier protein) reductase	0.0109467	0.00982874	0.0241262	0.0794787	0.272705	0.356809	0.358385	0.269544	0.225162	0.0734213	0.0603317	0.0435053	0.37211	0.357712	0.350855	0.0143231	0	0.00347678	0.0166404	0.0855669	0.196885	0.369657	0.918503	0.0880899	0.357639	0.697419	1	0.305327	0.252494	0.278918	0.0117031	0	0.280216	1	0.500002	0.0301841	0.00976287	0.012168	0.466949	1	0.766899	0.639307	0.02198	0.0231375	0
Synpcc7942_2388	oxdC	Oxalate decarboxylase	0.000213692	0.0117431	0.0288364	0.108046	0.296491	0.368503	0.3877	0.214273	0.273924	0.0349837	0.0390613	0.070558	0.91346	1	0.631608	0.00583214	0	0.00177519	0.0137101	0.100163	0.228807	0.366705	0.83222	0.0753641	0.409563	0.715236	0.788902	0.122706	0.131652	0.186128	0.0245622	0	0.470752	1	0.373841	0.120185	0	0.00615514	0.369396	0.757069	1	0.797889	0.0321116	0.0307602	0.0119567
Synpcc7942_0422		hypothetical protein	0.00942736	0.0482463	0.0929481	0.150863	0.206207	0.264332	0.279767	0.248309	0.192709	0.0418045	0.0136808	0.0254187	0.200828	0.306054	0.348437	0.0493079	0	0.0037121	0.0191119	0.0567454	0.134077	0.197179	1	0.0779263	0.232584	0.483254	0.593833	0.153089	0.0927413	0.138023	0.00795152	0.192079	0.757948	1	0.430118	0	0	0.0214196	1	0.759881	0.43932	0.336198	0.277059	0.0964491	0.118487
Synpcc7942_2385		dihydroorotate dehydrogenase 2	0.00430233	0.0037494	0.00818136	0.0413109	0.204466	0.255753	0.244137	0.233132	0.156364	0.0371209	0.0253548	0.0304151	0.355933	0.427067	0.312447	0.00829903	0.00114958	0	0.00771475	0.0627724	0.11279	0.209445	1	0.0589707	0.269949	0.537284	0.666262	0.0946833	0.083356	0.12922	0.136314	0	0.467793	1	0.83582	0.168497	0.0226527	0.0975232	0.803162	1	0.842887	0.857991	0	0.0846094	0.0506036
Synpcc7942_2326		hypothetical protein	0.00290657	0.00639407	0.0120499	0.162229	0.479988	0.446572	0.350172	0.285252	0.427117	0.184539	0.114967	0.158599	0.588713	0.528536	0.404724	0.00224853	0	0.00068191	0.0606742	0.329527	0.55898	0.527118	0.776208	0.255797	0.775803	1	0.888111	0.348707	0.334387	0.353022	0.0220667	0	0.765217	1	0.679207	0.170363	0.0124137	0.0126389	0.697477	1	0.792212	0.528429	0.00788299	0.0248758	0.0178524
Synpcc7942_2103		hypothetical protein	0.220442	0.068119	0.205797	0.525822	0.951822	0.814076	0.581809	0.720496	0.804198	0.461375	0.298194	0.194739	0.520791	0.696913	0.686692	0.223553	0	0.0314798	0.101582	0.462334	0.576468	0.739159	0.973427	0.36976	0.601805	0.847652	1	0.805824	0.580357	0.498467	0	0.123563	1	0.884418	0.476685	0.154407	0.0310392	0.11533	0.655982	0.633276	1	0.463836	0.0129555	0	0.20291
Synpcc7942_0369	aoxB	putative flavin-containing monoamine oxidase	0.00337072	0	0.0197406	0.18486	0.36479	0.372357	0.354659	0.285253	0.339718	0.0687688	0.0523332	0.0684811	0.606431	0.562764	0.410179	0.00089772	0.000420628	0.000381691	0.0363228	0.224079	0.33339	0.359031	0.671904	0.208859	0.677871	1	0.892704	0.38579	0.17455	0.219769	0.0199059	0	0.977103	1	0.822274	0.0491541	0.0312715	0.0841531	0.893273	1	0.880875	0.558316	0.00276366	0.012811	0.0437342
Synpcc7942_1678		hypothetical protein	0.162149	0.125846	0	0.0303695	0.354417	0.510926	0.510728	0.230006	0.307188	0.45366	0.342625	0.14755	0.398531	0.516749	0.460891	0.807942	0.196492	0.163632	0.113976	0.193893	0.426384	0.61448	1	0.229935	0.358086	0.727465	0.807043	0.309244	0.402579	0.495417	0.306362	1	0.175567	0.975972	0.350899	0	0.393037	0	0.278283	0.657724	1	0.71526	0.2453	0.0310429	0.360213
Synpcc7942_1987	rpaC	hypothetical protein	0.0078007	0.16029	0.252611	0.436465	0.596467	0.573622	0.500226	0.256475	0.496474	0.000195532	0.00422597	0.0206237	0.75228	0.760211	0.425631	0	0.00201562	0.00142661	0.0175406	0.0903372	0.171941	0.330325	0.945304	0.098414	0.84934	1	0.930115	0.0659511	0.0875725	0.0896094	0	0.0539663	1	0.961237	0.831247	0.333417	0.00924325	0	0.802753	0.604138	0.767155	1	0.274522	0.368645	0.221449
Synpcc7942_2306		Heat shock protein DnaJ-like	0.0188621	0.089864	0.125234	0.18788	0.357073	0.389748	0.446849	0.327758	0.356495	0.129521	0.0960949	0.132016	0.576881	0.577326	0.444839	0	0.0156209	0.0194648	0.0463336	0.135278	0.224155	0.327963	1	0.127011	0.57116	0.593308	0.595254	0.183421	0.211668	0.250741	0	0.0322219	0.438912	1	0.386531	0.0616895	0	0.0649234	0.497999	0.988901	1	0.83401	0.142017	0.133467	0.0295661
Synpcc7942_2333	opcA	opcA protein	0.00182342	0.00396704	0.0249984	0.170409	0.442364	0.558498	0.601348	0.442993	0.432268	0.315044	0.19405	0.187877	0.446077	0.579427	0.587901	0.00794947	0	0.0156283	0.0677917	0.298848	0.489797	0.630964	1	0.270536	0.50278	0.721885	0.79602	0.49414	0.463277	0.476631	0	0.0124544	0.459796	1	0.637531	0.0640368	0.00974847	0.0129258	0.529899	1	0.888759	0.576832	0.0144303	0.0116304	0
Synpcc7942_2387		hypothetical protein	0.0065135	0.0184112	0.0271399	0.123749	0.36473	0.448437	0.474138	0.230239	0.300683	0.0608763	0.046793	0.0718509	0.833202	1	0.688621	0.0317661	0.00314566	0	0.0210257	0.106419	0.214762	0.385439	0.840722	0.0879822	0.346337	0.700168	0.82967	0.160935	0.175633	0.237445	0.0596331	0	0.334413	1	0.335045	0.111679	0.00301963	0	0.27661	0.666885	1	0.709003	0.0111745	0.0141646	0.00327667
Synpcc7942_1402		hypothetical protein	0.0144236	0.0799142	0.213775	0.322887	0.410979	0.361711	0.437559	0.254189	0.427135	0.106541	0.0911794	0.134878	0.579519	0.683914	0.418655	0	0.00421597	0.00834908	0.0515268	0.196177	0.363769	0.377383	0.677657	0.205732	0.570418	1	0.664573	0.274622	0.205715	0.223077	0	0.0302591	0.835319	1	0.539547	0.138478	0	0.0589548	0.833768	1	0.804333	0.613725	0.107459	0.189879	0.0831711
Synpcc7942_2334	zwf	glucose-6-phosphate 1-dehydrogenase	0.00437477	0.000613358	0.0199348	0.166096	0.406761	0.498205	0.528512	0.415314	0.389875	0.265775	0.154868	0.181928	0.438021	0.563402	0.559392	0.00416024	0	0.0124723	0.0771882	0.272617	0.452084	0.582864	1	0.248751	0.452194	0.660243	0.723368	0.417686	0.390053	0.421854	0.00750739	0	0.482078	1	0.72255	0.0633522	0.00987932	0.0175314	0.566719	1	0.974987	0.597026	0.00199295	0	0.0173304
Synpcc7942_2484		hypothetical protein	0.00834597	0.0314459	0.0488526	0.154052	0.242033	0.3279	0.274679	0.199465	0.258501	0.178469	0.133779	0.162638	0.375539	0.323476	0.29744	0.17551	0.0130078	0	0.042103	0.177367	0.29809	0.437618	1	0.182226	0.590477	0.762121	0.730176	0.379025	0.349582	0.320247	0.215923	0.0555053	0.720959	1	0.635846	0	0	0.114978	0.48652	0.686954	1	0.94507	0.071427	0.102875	0.217273
Synpcc7942_2307		hypothetical protein	0.00455616	0.0673406	0.114793	0.17651	0.34153	0.335317	0.430662	0.150907	0.363632	0.143246	0.0998905	0.125886	0.515301	0.554165	0.453546	0	0.0114866	0.0145406	0.0434054	0.13581	0.233733	0.337666	1	0.119881	0.450634	0.652134	0.597593	0.202998	0.227235	0.291134	0.00135999	0	0.411822	1	0.38233	0.0362816	0	0.0397597	0.513027	0.959318	1	0.861796	0.125722	0.156948	0.0902097
Synpcc7942_1849	sigC, rpoD5, rpoD5/sigC	RNA polymerase sigma factor SigC	0.00441687	0.00220841	0.00280343	0.0632233	0.453305	0.484678	0.434322	0.365507	0.423403	0.0361471	0.027628	0.0445705	0.742806	0.763229	0.489039	0.00577802	0.000185254	0	0.00343118	0.0564985	0.21739	0.477115	0.80155	0.0445614	0.475736	0.840688	1	0.179818	0.215123	0.275232	0.0262802	0	0.28254	1	0.553092	0.0327253	0.00379604	0.00559396	0.466951	0.789173	1	0.97334	0.00373244	0.00212404	0.00137657
Synpcc7942_0305		hypothetical protein	0.0203167	0.0982345	0.0732888	0.215338	0.571011	0.640986	0.679039	0.704428	0.468102	0.231735	0.203753	0.22096	0.49975	0.639168	0.533061	0.0511343	0	0.0100084	0.0465477	0.298881	0.500827	0.630233	1	0.228028	0.578263	0.753247	0.774078	0.374763	0.372497	0.409303	0.00459316	0	0.515465	1	0.599591	0.272913	0.00198962	0.0435872	0.593187	1	0.895456	0.492518	0.0653247	0.0436697	0.0712871
Synpcc7942_0989		hypothetical protein	0.00924771	0.0188325	0.0345429	0.0863758	0.179096	0.22752	0.215554	0.161424	0.168366	0.0569045	0.0276048	0.0234136	0.207981	0.210736	0.17952	0.0692517	0	0.00132952	0.0177923	0.0760797	0.150262	0.230366	1	0.0648917	0.311004	0.376633	0.507293	0.134043	0.125521	0.156448	0.0299683	0.129357	0.59985	1	0.770691	0	0	0.0595247	0.510451	0.850629	0.711734	1	0.0437937	0.107694	0.0561278
Synpcc7942_2335	fbp, fbpII, fdp	fructose-1,6-bisphosphatase	0.00318794	0.00307269	0.0226698	0.132164	0.389142	0.43392	0.462113	0.368775	0.340237	0.208478	0.14881	0.166447	0.416077	0.481894	0.476252	0.00498999	0	0.0091499	0.0551756	0.229831	0.400493	0.46805	1	0.213167	0.461713	0.663945	0.678162	0.355789	0.320953	0.355453	0	0.0155008	0.506714	1	0.716459	0.11949	0.0172976	0.00315822	0.596045	1	0.969057	0.652554	0.00625861	0	0.049106
Synpcc7942_2080	xfp	putative phosphoketolase	0.00862348	0.0183903	0.114242	0.304911	0.46672	0.548765	0.587817	0.467981	0.467132	0.241633	0.237555	0.325223	0.96864	0.900403	0.789546	0.0259495	0	0.0583363	0.159833	0.392573	0.647163	0.860565	1	0.355739	0.809953	0.942903	0.945195	0.50977	0.533864	0.653893	0.0233742	0	0.43515	1	0.588712	0.0412581	0.0198229	0.0619719	0.544763	1	0.741387	0.681709	0.0524101	0	0.0456846
Synpcc7942_0244	glgP	Glycogen/starch/alpha-glucan phosphorylase	0.0222028	0.00529156	0.0157793	0.0865701	0.214111	0.252728	0.240343	0.199053	0.19295	0.0355817	0.0208489	0.0340516	0.388083	0.456939	0.331115	0.0317434	0	0.00449584	0.0205045	0.103303	0.199444	0.307462	1	0.11109	0.398274	0.695414	0.71176	0.203809	0.186418	0.198799	0	0.0103282	0.468344	1	0.582988	0.0831126	0.00456113	0.0055561	0.573377	1	0.641629	0.523977	0.00714888	0.00950704	0.0203877
Synpcc7942_1150		hypothetical protein	0.0165001	0.011472	0.0122654	0.0757111	0.256118	0.277111	0.298658	0.254948	0.22268	0.122193	0.103566	0.099284	0.223633	0.241724	0.223803	0.0104532	0	0.00407435	0.024352	0.112096	0.181641	0.243034	1	0.107363	0.442163	0.469734	0.495595	0.161553	0.186366	0.19742	0.0890564	0	0.481085	1	0.527984	0.121656	0.0352098	0.0404634	0.616797	1	0.948166	0.698232	0.0240059	0.0317958	0
Synpcc7942_0527		hypothetical protein	0.00274544	0.000606202	0	0.0970799	0.349468	0.364514	0.345038	0.223226	0.237936	0.188433	0.244149	0.219596	0.550408	0.479307	0.455907	0.0435524	0.034053	0.00488462	0.08371	0.401343	0.50461	0.571626	1	0.250485	0.433923	0.620818	0.771749	0.45925	0.557436	0.426538	0.0122849	0	0.545821	1	0.460114	0.164502	0.03722	0.0550022	0.495137	1	0.788014	0.555011	0	0.0556351	0.0466342
Synpcc7942_2079	ackA	acetate kinase	0.0128027	0.00651066	0.0193983	0.0546532	0.206016	0.281623	0.283419	0.279934	0.210245	0.10407	0.067275	0.0760009	0.29489	0.352828	0.359899	0.0233088	0.000299536	0	0.0136613	0.081925	0.164824	0.275984	1	0.0722141	0.268019	0.413804	0.577772	0.29378	0.201193	0.239257	0.0418836	0.0495814	0.418235	1	0.451012	0	0.0232205	0	0.305351	0.627026	1	0.58603	0.0366838	0.0646377	0.0169041
Synpcc7942_0581		hypothetical protein	0.0231239	0	0.0323975	0.134211	0.454204	0.469085	0.542568	0.386601	0.440267	0.26029	0.181691	0.250677	0.546803	0.664706	0.694898	0.038165	0.0370797	0.0117764	0.0770726	0.235391	0.409848	0.515626	1	0.23511	0.443437	0.672901	0.644802	0.425458	0.417877	0.505802	0.091033	0	0.633696	1	0.538746	0.059947	0.0463166	0.0683639	0.486236	1	0.945873	0.763835	0.0680887	0	0.122256
Synpcc7942_0370	metY	O-acetylhomoserine/O-acetylserine sulfhydrylase	0.00268517	0.0167239	0.0366729	0.128058	0.256448	0.291676	0.32312	0.267617	0.228762	0.0382851	0.0172459	0.149062	0.300494	0.373547	0.37702	0.0289792	0	0.00732977	0.0211699	0.110001	0.206036	0.279933	1	0.105397	0.296832	0.681476	0.686481	0.241174	0.125031	0.174858	0	0.0395764	0.565484	1	0.627486	0.0212223	0.234608	0.0531456	1	0.947571	0.611816	0.592474	0.069761	0	0.089223
Synpcc7942_1949		hypothetical protein	0.0218689	0.0266402	0.0739249	0.148148	0.34053	0.400821	0.42165	0.267408	0.311085	0.11151	0.0828322	0.0989268	0.42225	0.57373	0.505446	0.0388969	0	0.00662991	0.037288	0.105801	0.233778	0.361121	1	0.127662	0.428253	0.688744	0.72259	0.248432	0.212987	0.233121	0	0.150419	0.510623	1	0.51727	0.0250926	0.0194936	0.00679279	0.716652	1	0.977621	0.953883	0.0909601	0.0812538	0.158937
Synpcc7942_2556	hoxY	NAD-reducing hydrogenase HoxS delta subunit	0.0353442	0.0462141	0.0371025	0.164346	0.625121	0.618705	0.533586	0.590623	0.491986	0.284781	0.176083	0.156401	0.423124	0.528774	0.586131	0.0407138	0	0.0230733	0.0693032	0.277537	0.358989	0.569259	1	0.234845	0.449888	0.566547	0.834864	0.470205	0.429213	0.400196	0	0.0423609	0.423119	1	0.849627	0.0547104	0.0652894	0.0192736	0.721489	0.694602	1	0.411114	0	0.0462851	0.0738581
Synpcc7942_1950		hypothetical protein	0.00492118	0.0317837	0.0780223	0.159319	0.330223	0.359603	0.438352	0.206479	0.333494	0.124019	0.0975625	0.0955282	0.467286	0.64013	0.501296	0.0458267	0.00564665	0	0.0245869	0.1181	0.219925	0.30477	1	0.132231	0.403658	0.766746	0.748323	0.25201	0.246171	0.264907	0	0.11052	0.433617	1	0.5183	0.0273795	0.0804623	0.0865987	0.511898	1	0.934739	0.639503	0.0438634	0	0.0691786
Synpcc7942_0245	gap1, gap	glyceraldehyde-3-phosphate dehydrogenase	0.0244332	0.00827602	0.0106809	0.0754105	0.21612	0.258113	0.250464	0.202267	0.176298	0.0332267	0.0264509	0.0408957	0.39678	0.400885	0.316641	0.0240705	0.00102181	0	0.0120924	0.0844579	0.180368	0.301444	1	0.0910519	0.409881	0.673565	0.723727	0.205249	0.166035	0.182477	0.00573807	0	0.565906	1	0.626433	0.0805436	0	0.00625959	0.585392	1	0.765132	0.573796	0.00621202	0.0109983	0.0107968
Synpcc7942_1757		hypothetical protein	0.00553042	0.00648168	0.0529233	0.270816	0.493324	0.479341	0.424863	0.377263	0.437559	0.0853988	0.083786	0.103936	0.471342	0.403011	0.273483	0.00590679	0	0.00620157	0.0401397	0.245883	0.355219	0.478687	0.886732	0.181873	0.904881	1	0.991212	0.212143	0.214545	0.253117	0	0.0124246	0.675275	1	0.774302	0.181189	0.0135863	0.0235092	1	0.489487	0.522883	0.588106	0.0233783	0	0.0165521
Synpcc7942_0769		hypothetical protein	0.0158818	0.0469362	0.0561707	0.110651	0.291007	0.334844	0.308896	0.244958	0.24612	0.0156466	0.00813985	0.00946502	0.342782	0.459654	0.36174	0.0165373	0	0.00753747	0.0181239	0.0499626	0.106637	0.314432	1	0.0503853	0.425004	0.664093	0.957909	0.123478	0.101209	0.152852	0.0689449	0	0.763259	1	0.525655	0.123631	0	0.0686764	1	0.600678	0.96514	0.699513	0.175779	0.186448	0.360525
Synpcc7942_2308	gcvT	glycine cleavage system aminomethyltransferase T	0.131015	0.151844	0.0921594	0.163301	0.463394	0.483965	0.584574	0.424909	0.397225	0.198991	0.148171	0.158281	0.60179	0.632023	0.587318	0.134384	0.0671347	0	0.0141307	0.134487	0.256049	0.374549	1	0.111099	0.406242	0.492816	0.67658	0.254773	0.348099	0.405341	0	0.0499939	0.345694	1	0.460505	0.113203	0	0.0271001	0.364595	0.721377	1	0.669615	0.0365022	0.14333	0.0276103
Synpcc7942_0304		hypothetical protein	0.0139063	0.00781132	0.0392561	0.249912	0.755752	0.820007	0.776448	0.734491	0.612458	0.195197	0.186994	0.263092	0.635762	0.787625	0.763038	0.00606257	0	0.013615	0.0799899	0.364776	0.56991	0.688581	1	0.332805	0.562684	0.889226	0.824796	0.491925	0.423788	0.540811	0.017923	0	0.563463	1	0.726853	0.0736918	0.00292327	0.0136609	0.555156	1	0.711463	0.427924	0.00606104	0.00553276	0
Synpcc7942_2557	hoxU	bidirectional hydrogenase complex protein HoxU	0.00533917	0.0018233	0.0144053	0.12373	0.536775	0.507706	0.512246	0.515057	0.425606	0.213202	0.128544	0.159289	0.42243	0.49635	0.568187	0.00340612	0	0.00237318	0.0273816	0.184031	0.345358	0.450365	1	0.16657	0.338916	0.567	0.685654	0.368658	0.28885	0.365359	0.0492559	0	0.532086	1	0.955609	0.157027	0.0359394	0.0386768	0.498635	1	0.684262	0.416242	0	0.0387053	0.0317936
Synpcc7942_1209		hypothetical protein	0	0.0930835	0.147418	0.180657	0.297368	0.190587	0.271007	0.0419508	0.273193	0.158677	0.100459	0.124118	0.287177	0.29658	0.250023	0.187275	0.0739244	0.0690019	0.123282	0.144581	0.261214	0.37749	1	0.201105	0.50823	0.575476	0.658075	0.2042	0.257712	0.241087	0.41442	0	0.899416	1	0.221181	0.224318	0.23702	0	0.358494	1	0.711621	0.974363	0.430766	0.37638	0.199055
Synpcc7942_2082	fus	elongation factor G	0.000348933	0.00776793	0.0169189	0.0618843	0.159195	0.175142	0.187856	0.192691	0.12638	0.0182388	0.0135347	0.0144864	0.105658	0.174644	0.167665	0.00806397	0	0.00331679	0.0138988	0.0519136	0.105523	0.199685	1	0.0461551	0.330259	0.442325	0.466498	0.183238	0.0861062	0.111847	0	0.0160713	0.627413	1	0.923245	0.0830419	0.00260778	0	1	0.78764	0.465967	0.298144	0.00169173	0.000347267	0.0006986
Synpcc7942_2336		hypothetical protein	0.00298741	0.00153113	0.0106083	0.105105	0.295387	0.291852	0.325568	0.209655	0.287584	0.140427	0.099663	0.113381	0.34237	0.338339	0.314874	0.00328157	0	0.00487627	0.0483586	0.181574	0.283248	0.361421	1	0.148433	0.445817	0.870231	0.595875	0.253735	0.206947	0.303789	0.00705681	0	0.610198	1	0.735581	0.0767775	0.00406446	0.0168012	0.550937	1	0.908735	0.607956	0.0109684	0.00910364	0
Synpcc7942_0086	glgX	isoamylase. Glycosyl Hydrolase family 13.	0.000119385	0.00295406	0.00899902	0.0126108	0.17935	0.316443	0.391397	0.342605	0.140013	0.0526633	0.0138492	0.0207543	0.163002	0.351143	0.464664	0.105619	0	0.00709445	0.0131005	0.0258112	0.118463	0.301229	1	0.0223092	0.106407	0.31917	0.624866	0.200732	0.155721	0.219307	0.00258326	0	0.2468	1	0.489255	0.0698706	0	0.479501	0.622068	0.848982	1	0.881728	0.0582966	0.0482489	0.0280158
Synpcc7942_1830	trxA, trxM, trx	thioredoxin	0	0.231487	0.243427	0.401336	0.560942	0.544689	0.508262	0.403141	0.527818	0.174182	0.18901	0.228351	0.898785	0.701728	0.480358	0.019552	0.0568647	0.105853	0.21938	0.427407	0.563225	0.644533	0.854839	0.340307	1	0.885018	0.955417	0.256708	0.364095	0.411466	0	0.0591238	0.6273	1	0.435388	0.101007	0	0.107217	0.739731	1	0.607816	0.590722	0.212759	0.206807	0.148544
Synpcc7942_0644	cikA, sccikA	GAF sensor hybrid histidine kinase	0	0.0120637	0.0214548	0.110771	0.329487	0.375066	0.417323	0.321725	0.317478	0.247975	0.206045	0.207665	0.327576	0.364895	0.351528	0.0832726	0.00303065	0.000393962	0.0278337	0.143731	0.253266	0.353622	1	0.121836	0.455216	0.574271	0.5669	0.214112	0.318841	0.343791	0.061792	0	0.380433	1	0.438983	0.0105355	0.0146034	0	0.406384	0.870676	1	0.638762	0.0417181	0.0179034	0.0374928
Synpcc7942_2485		hypothetical protein	0	0.0392402	0.0753216	0.145485	0.20342	0.253416	0.276024	0.117425	0.219838	0.113447	0.111557	0.0922926	0.406332	0.399949	0.24274	0.0798503	0.00297376	0.00265976	0.0436049	0.162632	0.215115	0.325953	1	0.139389	0.743423	0.765422	0.712775	0.223712	0.201668	0.240872	0.212352	0	0.54982	1	0.374171	0.174788	0	0.107361	0.646788	1	0.956645	0.869513	0.220256	0.122305	0.125241
Synpcc7942_1290	smtA	SmtA metallothionein	0	0.208439	0.09492	0.0871453	0.226691	0.200726	0.245338	0.232572	0.201983	0.0916088	0.0318003	0.0176094	0.208604	0.787408	0.347471	0.092994	0.0273296	0.0113094	0.0331366	0.0618331	0.113017	0.23685	1	0.0657942	0.239062	0.624274	0.438663	0.126178	0.0756595	0.103635	0	0.197748	0.340304	1	0.569447	0.222068	0.216362	0.0143134	0.464231	0.152348	1	0.362149	0.0273243	0.00894833	0.12163
Synpcc7942_2486		hypothetical protein	0	0.0525951	0.0666388	0.118835	0.204234	0.207061	0.236648	0.160201	0.196395	0.0919409	0.0899562	0.115126	0.41152	0.388503	0.23826	0.0554364	0.00766075	0.00139824	0.0348846	0.134888	0.20662	0.247712	1	0.123127	0.630767	0.736599	0.613627	0.147266	0.159487	0.182343	0.00094366	0	0.50046	1	0.434331	0.268829	0	0.130625	0.72027	0.807809	0.85567	1	0.0841205	0.0262327	0.0353741
Synpcc7942_0491		hypothetical protein	0.0413804	0.111915	0.235702	0.466156	0.490778	0.539625	0.316651	0.48081	0.311226	0	0.0459344	0.164155	0.716423	0.823894	0.660344	0.110035	0.0221271	0.0278944	0.147984	0.300399	0.501952	0.840891	0.889833	0.163447	1	0.433382	0.971713	0.202401	0.407233	0.386625	0.377033	0.507773	0.176987	0.183855	1	0	0.0971813	0	0.122109	0.305364	1	0.713628	0.27847	0.53272	0.754589
Synpcc7942_0780		serine/threonine protein kinase	0.0142073	0.0681577	0.0739776	0.115483	0.183565	0.219238	0.173214	0.203267	0.185745	0.0287249	0.0192242	0.02607	0.342955	0.300753	0.220171	0.0356558	0	0.0094173	0.0211101	0.0576795	0.0868751	0.165818	1	0.0591804	0.559806	0.664593	0.617842	0.138152	0.0662326	0.106822	0	0.0564392	0.935281	1	0.889352	0.331347	0	0.145097	1	0.906091	0.27967	0.576603	0.264516	0.262913	0.432835
Synpcc7942_1824		CBS	0	0.154304	0.234015	0.300186	0.392661	0.48004	0.433291	0.359979	0.407946	0.172994	0.264032	0.304679	0.862666	0.651306	0.412643	0.0119605	0.111938	0.197547	0.224311	0.38324	0.508972	0.573634	0.815355	0.329481	1	0.814645	0.674877	0.203125	0.330146	0.390516	0	1	0.516214	0.791887	0.754494	0.641176	0.0502096	0.211364	0.592351	0.935094	1	0.719053	0.169762	0.0921329	0
Synpcc7942_0180		hypothetical protein	0	0.0445025	0.0882837	0.11948	0.207365	0.0910601	0.230027	0.0159189	0.223533	0.154434	0.13393	0.135135	0.516893	0.433507	0.297638	0.105589	0.0662617	0.0606996	0.0934224	0.175421	0.244668	0.275243	0.623454	0.172088	0.519742	1	0.590306	0.178999	0.258051	0.303259	0	0.0435048	0.893131	1	0.311841	0.117381	0.0126122	0	0.19442	0.533761	0.820253	1	0.176812	0.129126	0.0726812
Synpcc7942_0252	cp12	hypothetical protein	0	0.0415256	0.0587571	0.0762002	0.109964	0.131165	0.138411	0.118954	0.0989318	0.067361	0.0180465	0.023767	0.183777	0.204436	0.155613	0.0167889	0.00745812	0.00812716	0.0105863	0.0563894	0.094759	0.146525	1	0.0771625	0.38204	0.610212	0.560941	0.129955	0.144042	0.13926	0.000676352	0	0.340809	1	0.446641	0.245014	0.0249475	0.0202503	0.533038	0.688282	1	0.511474	0.185116	0.13144	0.0479938

## Sheet: Late cluster
			Scaled expression (range from 0 to 1)																														Scaled expression (range from 0 to 1)						Scaled expression (range from 0 to 1)
			Low Light								High Light pulse							Clear Day								Shade pulse							Constant Light (data from Markson, J.S., et. al 2013)						OX-D53E strain (rpaA-, kaiBC-, Ptrc::rpaA(D53E)) (data from Markson, J.S., et. al 2013)
											Minutes in High Light pulse				Minutes since return to Low Light											Minutes in High Light pulse				Minutes since return to Low Light									Hours post Induction						No induction
											0	15	30	60	15	30	60									0	15	30	60	15	30	60							0	0.5	2	3	6	12
			Hours since dawn								Hours since dawn							Hours since dawn								Hours since dawn							Hours in Constant Light						Hours in Constant Light						Hours in Constant Light
Gene ID	Gene name	Gene description	0.5	2	4	6	8	9	10	12	8	8.25	8.5	9	9.25	9.5	10	0.5	2	4	6	8	9	10	12	8	8.25	8.5	9	9.25	9.5	10	24	28	32	36	40	44	24	24.5	26	27	30	36	24	27	36
Late cluster average expression			0.0292249	0.0677855	0.060536	0.0822295	0.201279	0.288573	0.325994	0.264275	0.175532	0.0808436	0.0635502	0.0624951	0.204156	0.29074	0.314344	0.0734727	0.038402	0.0351314	0.0444829	0.0702295	0.122579	0.24359	1	0.0668622	0.199981	0.300841	0.461957	0.148062	0.138179	0.175029	0.137176	0.171987	0.329487	0.970071	0.575112	0.103639	0.210278	0.142375	0.548832	0.516328	0.77572	0.77293	0.269123	0.198705	0.234096
Late cluster expression standard deviation			0.0377625	0.102362	0.0780149	0.0724945	0.10461	0.127408	0.131786	0.130482	0.0921132	0.108057	0.0879447	0.0862294	0.102963	0.118155	0.128782	0.0979764	0.0746358	0.0644823	0.0690151	0.0700309	0.0849721	0.114976	0	0.0674756	0.125306	0.137108	0.147778	0.1031	0.0971364	0.106979	0.195772	0.238789	0.253349	0.11175	0.226734	0.132013	0.263741	0.208761	0.319819	0.252081	0.242711	0.242814	0.23513	0.212649	0.257656
Synpcc7942_2349	pilT	twitching motility protein	0	0.103621	0.13329	0.161849	0.246384	0.309253	0.335307	0.255682	0.222777	0.0720593	0.0532337	0.0631664	0.262197	0.355773	0.35744	0.0871868	0.0611057	0.0538788	0.0514132	0.0751564	0.130329	0.247973	1	0.0721975	0.210342	0.418696	0.545159	0.128684	0.112394	0.184626	0.413185	0.940016	0.776532	1	0.474705	0	0.235949	0.297497	1	0.767216	0.413781	0	0.806236	0.593644	0.896419
Synpcc7942_2540	digB	blue-copper-protein-like protein	0.039664	0.0580008	0.0445132	0.0497324	0.113351	0.0928537	0.18971	0.134368	0.0791112	0.051739	0.0567142	0.0767634	0.122384	0.162548	0.157988	0.0446548	0.0228981	0.0205034	0	0.00378236	0.016329	0.126521	1	0.012189	0.123652	0.171202	0.323386	0.0401288	0.0485167	0.0849884	0.558953	0.101726	1	0.720399	0.720392	0	0.787837	0.237086	0	0.391066	1	0.549114	0.624522	0.404459	0.468349
Synpcc7942_2096		diguanylate cyclase with GAF sensor	0.0272952	0.0662268	0.100935	0.110473	0.157713	0.166781	0.159618	0.110721	0.15149	0.0254816	0.0205976	0.0194563	0.199643	0.204683	0.151164	0.0609376	0.00231688	0	0.00352319	0.0178394	0.0482836	0.0919464	1	0.0122083	0.205724	0.342353	0.444945	0.0442884	0.0398898	0.0414037	0.191099	0.603194	1	0.847382	0.271895	0	0.0950184	0	1	0.406528	0.26573	0.243099	0.533634	0.371598	0.0849228
Synpcc7942_2458	comE	ComEC/Rec2-related protein	0.00944645	0.00892388	0.00343033	0.0180165	0.114949	0.190597	0.207646	0.180193	0.0869877	0.013377	0.0300873	0.0237469	0.108825	0.256039	0.275059	0	0.0408893	0.021885	0.0137054	0.0089014	0.0428501	0.126932	1	0.0222008	0.139258	0.327705	0.592394	0.0858529	0.0571253	0.0805592	0.0514494	0	0.259763	0.99246	1	0.162483	0.528831	0.0230197	1	0.0300552	0.916296	0.831297	0.290738	0.501013	0.153869
Synpcc7942_0768		hypothetical protein	0.00740692	0.0239684	0.0392798	0.0710168	0.155787	0.185077	0.16982	0.123406	0.136401	0.00429778	0.00388016	0.00737008	0.212797	0.276295	0.207171	0.00967735	0	0.00388528	0.00685497	0.0278046	0.0632414	0.152984	1	0.0322655	0.310064	0.461438	0.634293	0.0548317	0.0453929	0.0651016	0	0.131544	0.626211	1	0.603279	0.0513496	0.172649	0	1	0.492299	0.802444	0.7584	0.206866	0.229003	0.141778
Synpcc7942_1411		hypothetical protein	0.00649619	0.0113753	0.000357112	0.0758892	0.21727	0.378959	0.332312	0.276219	0.189599	0.0770591	0.0420244	0.0257637	0.214313	0.330827	0.291296	0.086474	0	0.0176576	0.0409136	0.0920305	0.17527	0.309303	1	0.0690262	0.184053	0.326775	0.510126	0.198792	0.181538	0.209906	0	0.498083	0.283872	1	0.921219	0.0140459	0.428872	0	0.631354	0.688073	0.669676	1	0.364901	0.400622	0.627001
Synpcc7942_2432		hypothetical protein	0.0969474	0.0705741	0.0473941	0.0615756	0.202203	0.307989	0.264107	0.19825	0.195362	0.0591138	0.0691738	0.0252273	0.200703	0.347877	0.26629	0.210871	0	0.00871821	0.0402525	0.0719013	0.128567	0.196599	1	0.0463165	0.287788	0.336048	0.539219	0.194542	0.129767	0.180802	0.0469335	0	0.00997727	1	0.276009	0.00443231	0.454383	0	1	0.52525	0.944212	0.609048	0.388761	0.210121	0.348989
Synpcc7942_0401	dgkA	diacylglycerol kinase	0.0790525	0.147204	0.112517	0.111305	0.191031	0.293049	0.261833	0.315977	0.162374	0.0018963	0	0.0212753	0.158909	0.218249	0.277379	0.0802765	0.0385057	0.0430684	0.0374873	0.0581183	0.109262	0.19679	1	0.076868	0.246478	0.279711	0.455598	0.115075	0.0498881	0.117639	0.226468	0	0.563335	1	0.69443	0.186047	0.0930013	0	1	0.821801	0.805317	0.706283	0.339778	0.0881486	0.616444
Synpcc7942_2535		diguanylate cyclase (GGDEF domain) with PAS/PAC and GAF sensors	0.0177274	0.0592979	0.0444787	0.0951383	0.215691	0.250876	0.245826	0.200502	0.198677	0.0132854	0.0177362	0.0230923	0.42405	0.46536	0.306323	0.0495037	0.00570491	0	0.0136657	0.0489053	0.0925581	0.183605	1	0.0501479	0.374101	0.503498	0.68341	0.0600938	0.0829597	0.108578	0	0.0532426	0.444679	1	0.529907	0.00768652	0.00610115	0.0837567	0.778052	0.293019	0.915057	1	0.230451	0	0.00357765
Synpcc7942_0100		hypothetical protein	0.0231791	0.0253859	0.0423733	0.0850739	0.222132	0.308114	0.315207	0.21532	0.200233	0.0127073	0.00815013	0.00746553	0.209607	0.455803	0.392829	0.00708011	0	0.00760875	0.0176182	0.0304747	0.0667267	0.211914	1	0.0493555	0.240026	0.725059	0.906271	0.0843572	0.0624591	0.0635398	0	0.286912	0.402076	1	0.576461	0.223815	0.00361151	0.0925891	0.900331	0.139607	0.391753	1	0.28232	0.107216	0.100468
Synpcc7942_0573		hypothetical protein	0.00694406	0.00407966	0.0177816	0.0203052	0.0845812	0.138934	0.198476	0.146456	0.116642	0.0289561	0.0111812	0.00988016	0.0993636	0.211888	0.203245	0.00262247	0.00586899	0	0.00371387	0.0150605	0.0586014	0.131234	1	0.0145166	0.120207	0.289133	0.425536	0.0657072	0.0374176	0.0917002	0.0226336	0.13284	0.456995	1	0.266868	0	0	0.124235	0.666676	0.655487	1	0.853258	0.0662512	0.0102103	0.0211419
Synpcc7942_0522		hypothetical protein	0.0431734	0.0973404	0.0836151	0.0902215	0.111743	0.187794	0.182453	0.21991	0.142472	0.00895948	0.00888783	0.0197734	0.165196	0.206778	0.194458	0.0726606	0.0102218	0	0.0443532	0.0333301	0.0959162	0.164561	1	0.0492106	0.234972	0.381333	0.522309	0.0609111	0.0904329	0.0954109	0.44839	0.554705	1	0.211326	0.0473408	0	0.0703538	0	0.259796	0.298801	0.662087	1	0.530492	0.288803	0.103921
Synpcc7942_2507		hypothetical protein	0.044219	0.0241359	0	0.0578345	0.241246	0.303661	0.364789	0.279095	0.25764	0.139624	0.0587571	0.096075	0.388293	0.478826	0.436546	0.0420343	0.0442138	0.00566948	0.0360733	0.0965018	0.18575	0.303597	1	0.113	0.327783	0.458143	0.630574	0.168193	0.336449	0.20106	0.140652	0	0.318939	1	0.625012	0.107965	0	0.286506	0.211386	1	0.29224	0.657946	0.0527699	0.0736965	0.176956
Synpcc7942_1784	sigF2	RNA polymerase sigma factor SigF	0.00332634	0.0158426	0.019562	0.0451468	0.208843	0.258281	0.25333	0.203391	0.179367	0.000464319	0.00541178	0.00820545	0.291653	0.368246	0.247144	0.00587549	0	0.000994346	0.00602316	0.0338473	0.100276	0.262314	1	0.034507	0.384484	0.540454	0.647431	0.0702227	0.0950879	0.107503	0	0.0176948	0.272686	1	0.599163	0.0458205	0	0.0687459	0.647975	0.587453	0.719401	1	0.0940196	0.0608958	0.0864835
Synpcc7942_2553	hypA	hydrogenase nickel insertion protein HypA	0.0265804	0.0704876	0.0194856	0.109604	0.395767	0.611252	0.563208	0.513382	0.320078	0.144413	0.0346719	0.0675929	0.265896	0.648898	0.700378	0.0351628	0	0.00592824	0.0134001	0.0712443	0.168074	0.47031	1	0.0866857	0.13691	0.398424	0.768609	0.31303	0.259676	0.317989	0	0.0447449	0.377927	1	0.820891	0.267207	0.164984	0.000525976	0.54254	0.493227	1	0.400835	0	0.0267613	0.0367758
Synpcc7942_0033		hypothetical protein	0	0.00378457	0.0407841	0.0631987	0.119633	0.0936087	0.257635	0.00629369	0.146361	0.0895382	0.0684476	0.0854224	0.212089	0.245303	0.30733	0.0506839	0.0199863	0.0216478	0.0561658	0.0795773	0.115823	0.20404	1	0.0699521	0.111606	0.322117	0.328964	0.147438	0.164681	0.179592	0	0.188829	0.323542	1	0.295509	0.0716184	0.0202515	0.35128	0.529583	0.840047	0.729545	1	0.228515	0.317468	0
Synpcc7942_1327		hypothetical protein	0.110232	0.0733448	0.0746965	0.0139722	0.150066	0.252497	0.427762	0.334632	0.13223	0.0448124	0.0344961	0	0.127125	0.233521	0.391995	0.0921519	0.0382974	0.0739648	0.0698765	0.0801268	0.102406	0.285061	1	0.0557553	0.034737	0.177996	0.324944	0.247085	0.232229	0.24367	0.137899	0	0.127372	1	0.604747	0.348232	0.321131	0	0.417761	0.150238	1	0.896163	0.913767	0.56802	0.969674
Synpcc7942_0703	smf	DNA processing protein DprA, putative	0.00649405	0.00883848	0.0133894	0.0369892	0.125597	0.230985	0.297508	0.263774	0.122386	0.0193961	0.00672564	0.00868524	0.137471	0.276893	0.355574	0.00646661	0.00320903	0	0.00559383	0.0227452	0.0753041	0.20958	1	0.0310289	0.13492	0.334709	0.539486	0.142198	0.0805981	0.128609	0	0.0533297	0.23575	1	0.5466	0.0236349	0.0393499	0	0.812637	0.559363	0.817787	1	0.179183	0.0314941	0.000358493
Synpcc7942_1096	thiC	thiamine biosynthesis protein ThiC	0.019091	0.0368384	0.0246031	0	0.0467805	0.145499	0.236609	0.185644	0.040631	0.0792431	0.119583	0.119595	0.0989433	0.127955	0.184707	0.0671469	0.07898	0.0383359	0.0406891	0.0551999	0.112391	0.258003	1	0.0684923	0.0946828	0.136779	0.219088	0.138254	0.167328	0.233561	0.57948	0.66761	0.16751	1	0.439779	0	1	0.910384	0	0.522722	0.260898	0.154942	0.466766	0.450041	0.423223
Synpcc7942_1777		hypothetical protein	0	0.0854294	0.0570324	0.0646184	0.200717	0.299473	0.303338	0.228224	0.162497	0.0176193	0.022444	0.0299307	0.353271	0.40115	0.281888	0.0306826	0.000377092	0.00267642	0.000131602	0.0257341	0.0634769	0.205646	1	0.0335745	0.195903	0.316622	0.607284	0.0392691	0.0763506	0.0812933	0.260535	0	0.21361	1	0.388034	0.0216118	0.000270216	0.0425754	0.396768	0.532713	1	0.686623	0.186109	0.27056	0.0521558
Synpcc7942_1412		hypothetical protein	0	0.0544452	0.046425	0.114118	0.231451	0.332277	0.322815	0.263017	0.216576	0.0824397	0.0667843	0.0663958	0.289939	0.33204	0.301413	0.0825747	0.0251205	0.0372305	0.0814053	0.12706	0.192321	0.343172	1	0.0991491	0.29046	0.368838	0.504545	0.201915	0.179324	0.221758	0.113685	0.0428362	0.252209	1	0.628707	0	0.162648	0	0.670937	0.56168	0.753718	1	0.226315	0.183659	0.419697
Synpcc7942_0256	ama	Peptidase M20D, amidohydrolase	0.0684498	0.0765639	0.0373394	0.0903662	0.244016	0.360272	0.329771	0.311572	0.238254	0.0574639	0.0211749	0.0212321	0.257802	0.351227	0.385777	0.206079	0.00977603	0	0.0152574	0.0541196	0.128742	0.250293	1	0.0632376	0.223243	0.32102	0.572373	0.165364	0.135775	0.214585	0.117745	0.605195	0.131069	1	0.56913	0	0.488016	0	0.534718	1	0.208124	0.605623	0.242307	0.353705	0.386694
Synpcc7942_0834		hypothetical protein	0.00470792	0.000122911	0.000217751	0.0022146	0.0527463	0.172235	0.258379	0.151836	0.0421611	0.0251765	0.00875954	0.00636947	0.0305011	0.0556135	0.0973101	0.0137189	0.000127605	0	0.000132215	0.00180683	0.0107903	0.0470526	1	0.00172526	0.0122728	0.0350448	0.115288	0.0394843	0.0206751	0.0321298	0.0256648	0	0.0617379	1	0.302853	0.00729788	0.0013397	0.00152068	0.00417053	0.0581297	0.688178	1	0.00229914	0.00651423	0
Synpcc7942_0704	act	Chloramphenicol O-acetyltransferase	0.0209751	0.0194217	0.0364787	0.0544544	0.174481	0.261791	0.355097	0.259072	0.153483	0.0376734	0.0108569	0.0132599	0.166535	0.417075	0.522197	0.0303534	0	0.00769783	0.017108	0.0246096	0.104305	0.26734	1	0.0393621	0.119643	0.370386	0.626285	0.23329	0.117546	0.224485	0.128132	0	0.357417	1	0.715486	0.123017	0.0177974	0	0.65544	0.0496056	1	0.8859	0.0290677	0.129182	0.0722065
Synpcc7942_1420	chlN, bchN	light-independent protochlorophyllide reductase subunit N	0	0.0991459	0.120766	0.157761	0.179881	0.27049	0.348143	0.247328	0.189196	0.0561044	0.0557919	0.0624788	0.366509	0.375372	0.345316	0.0116943	0.0180986	0.020514	0.0444194	0.131341	0.210931	0.343117	1	0.0961501	0.271837	0.362574	0.427807	0.199036	0.196663	0.300715	0.0331329	0	0.233943	1	0.600729	0.14413	0	0.0564785	0.242539	0.774812	1	0.875367	0.081625	0.0969309	0.0586639
Synpcc7942_2590	digC	pilin-like protein-like	0.00323902	0	0.00104973	0.00694477	0.0558013	0.117513	0.15905	0.133564	0.0458286	0.00407256	0.00677942	0.00615301	0.153909	0.153297	0.117114	0.00254052	0.00228671	0.00192395	0.000922219	0.00427951	0.0124348	0.0555002	1	0.00504847	0.0734737	0.155062	0.267365	0.00982101	0.0158064	0.0207681	0.0319023	0	0.170896	1	0.501732	0.0573603	0.182483	0.0236934	0.289837	0.275134	1	0.83611	0.00888336	0.0411791	0.0107645
Synpcc7942_2187		hypothetical protein	0.0401188	0.15948	0.137044	0.146096	0.228302	0.280395	0.230147	0.216586	0.16273	0	0.00359208	0.0265347	0.251519	0.293083	0.282553	0.0332482	0.0200782	0.0586298	0.0584819	0.0818165	0.106263	0.229316	1	0.082255	0.352149	0.414056	0.548594	0.13227	0.0906294	0.0972447	0	0.551896	0.639422	1	0.359663	0.238024	0.310467	0.197311	1	0.69203	0.721781	0.592449	0.0691399	0.0726238	0.440293
Synpcc7942_2591		hypothetical protein	0.000618546	0	0.000646479	0.00612758	0.0538598	0.123545	0.168252	0.108168	0.0502418	0.00280434	0.00387436	0.00451545	0.148651	0.15928	0.125273	0.0020401	0.000408426	0.000831849	0.00166542	0.00437388	0.0152588	0.0533769	1	0.00519908	0.0699128	0.145626	0.28338	0.0123696	0.0155203	0.0239272	0.00409477	0	0.0947617	1	0.514341	0.0182974	0.126793	0.0615018	0.283551	0.563957	0.919271	1	0.157912	0	0.0219181
Synpcc7942_1610	pntB	pyridine nucleotide transhydrogenase beta subunit	0.001757	0.000258491	0.00760702	0.0562047	0.1989	0.354371	0.430107	0.38684	0.185952	0.0781251	0.0639406	0.0698149	0.335707	0.412498	0.391658	0.00360122	0	0.00170079	0.0187336	0.0850215	0.151149	0.282697	1	0.0712295	0.151261	0.231581	0.397235	0.155237	0.168118	0.207047	0.0333522	0	0.303832	1	0.63648	0.0681788	0.00246924	0.0135272	0.294498	0.632158	1	0.823448	0	0.00492004	0.001188
Synpcc7942_1227	radC	DNA repair protein RadC	0.0264353	0.011132	0.0333741	0.064097	0.134269	0.218145	0.25374	0.280016	0.12606	0.0203374	0.00544549	0.00862441	0.134264	0.260622	0.317304	0.031006	0	0.00138194	0.00456167	0.0150638	0.0649517	0.193875	1	0.0209113	0.14853	0.349773	0.493183	0.121675	0.0661944	0.118768	0	0.314297	0.524188	1	0.878263	0.00889955	0.230408	0	1	0.409155	0.683414	0.857585	0.0973425	0.0545594	0.170071
Synpcc7942_1612	pntA	pyridine nucleotide transhydrogenase alpha subunit	0.00343252	0.00218355	0.00760277	0.0495051	0.187156	0.305766	0.356601	0.320474	0.159464	0.0625218	0.0483989	0.0573054	0.295575	0.327509	0.340476	0.0027704	0	0.00349873	0.0172533	0.0729369	0.142501	0.273333	1	0.0664775	0.148057	0.248386	0.391555	0.132782	0.154718	0.187322	0.0382256	0	0.294493	1	0.58441	0.058673	0.00534472	0.014392	0.316752	0.695707	1	0.845069	0.00282236	0.00581707	0
Synpcc7942_0599		putative transcriptional regulator, TetR family	0.00401828	0.00274843	0.00470614	0.0226294	0.161351	0.270224	0.275683	0.251447	0.129691	0.04349	0.0342494	0.0304185	0.139148	0.184259	0.254033	0.0100662	0	0.00115021	0.00826122	0.0467366	0.103301	0.235407	1	0.0391905	0.154594	0.208897	0.377625	0.139627	0.120221	0.151895	0	0.0163082	0.243715	1	0.657239	0.0717448	0	0.0999613	0.514519	0.671056	1	0.896885	0.0331863	0.0800183	0.0851246
Synpcc7942_2346	hisB	HAD-superfamily subfamily IA	0.0428773	0.059705	0.00836821	0.000243677	0.172726	0.362636	0.377714	0.350487	0.0902671	0.0874751	0.136173	0.118655	0.141998	0.261469	0.32665	0.0088295	0.0603231	0.0418797	0.0345554	0	0.0363291	0.312007	1	0.0243697	0.0231692	0.145697	0.398467	0.073503	0.0938874	0.1511	0.399595	0.433442	0	0.989968	1	0.378794	1	0.796744	0	0.847342	0.919548	0.293271	0.543393	0.22583	0.648518
Synpcc7942_0647		hypothetical protein	0.0196534	0.0117302	0	0.0238712	0.200873	0.332293	0.35555	0.332872	0.177357	0.110991	0.0863391	0.0571855	0.117853	0.222015	0.313092	0.0655697	0.0118199	0.0130334	0.0180765	0.0347556	0.0962602	0.286654	1	0.0261491	0.0697165	0.166393	0.45321	0.181548	0.191721	0.193	0	0.0491351	0.385487	1	0.871442	0.124578	0.0701808	0	0.218839	0.359932	0.810921	1	0.212628	0.0619642	0.0513301
Synpcc7942_0312		hypothetical protein	0.0146097	0.0194324	0.0233521	0.0253736	0.129076	0.198321	0.242254	0.263965	0.0944511	0.0157788	0.00223342	0.00530534	0.129198	0.219669	0.280148	0.0147166	0	0.00342321	0.0021862	0.0136748	0.0458427	0.159496	1	0.0119698	0.131018	0.221744	0.407042	0.0681158	0.0460201	0.0895347	0	0.0394265	0.388677	1	0.553585	0.0609655	0	0.0354746	0.978195	0.233543	0.805486	1	0.0153139	0.0587986	0.149054
Synpcc7942_1095		hypothetical protein	0.0490627	0.029897	0.0519132	0.0984988	0.16707	0.185537	0.214734	0.199046	0.134291	0.0685812	0.0384762	0.0521515	0.121439	0.160364	0.184932	0.0796524	0.0075175	0	0.0218524	0.0360891	0.0893273	0.129421	1	0.0370932	0.17338	0.237777	0.39137	0.142149	0.108317	0.0862626	0	0.173017	0.294974	0.587436	1	0.14525	0.0756487	0	0.446236	0.385946	1	0.67265	0.0396755	0.084254	0.0678696
Synpcc7942_1556		hypothetical protein	0.0942272	0.00683712	0	0.0428453	0.229219	0.299078	0.370825	0.324768	0.190628	0.118488	0.103952	0.105643	0.161852	0.210972	0.2829	0.103747	0.0223291	0.0227656	0.0258672	0.0679561	0.120375	0.205676	1	0.0615706	0.123158	0.2276	0.33669	0.183362	0.145095	0.205719	0.0772487	0	0.310416	1	0.619396	0.0646559	0.0962142	0.161001	0.508366	0.808287	1	0.656268	0.0473029	0.0461948	0
Synpcc7942_0032		hypothetical protein	0	0.0203517	0.0440743	0.0821365	0.164198	0.201197	0.287213	0.042321	0.139115	0.143248	0.131731	0.0983207	0.214121	0.334821	0.361219	0.0806779	0.0335157	0.0305149	0.0665224	0.102018	0.164927	0.237705	1	0.0961977	0.190758	0.332231	0.490651	0.194891	0.228117	0.282552	0.101929	0.0701343	0.186537	1	0.133093	0	0.195243	0.118916	0.383097	0.771296	0.90634	1	0.00569865	0.171662	0
Synpcc7942_1838	chlB, bchB	light-independent protochlorophyllide reductase subunit B	0.0219508	0.0287117	0.0261455	0.0457029	0.115093	0.184161	0.193715	0.187111	0.101225	0.000797201	0	0.00448076	0.309042	0.31997	0.232071	0.0270274	0.00137284	0.000891393	0.00116972	0.018077	0.044905	0.134141	1	0.0155986	0.253071	0.324587	0.453005	0.0237197	0.0290826	0.0519001	0	0.134487	0.266407	1	0.663633	0.143903	0	0.0778785	0.471174	0.552193	0.802149	1	0.187482	0.106188	0.023785
Synpcc7942_1611	pntA	nicotinamide nucleotide transhydrogenase alpha subunit-like	0.000141968	0	0.00656982	0.0600135	0.181361	0.315294	0.373712	0.313605	0.175913	0.0651698	0.0596376	0.0583127	0.316808	0.395031	0.378041	0.00210351	0.000252282	0.00558345	0.0207288	0.0777388	0.147997	0.30144	1	0.0772698	0.145242	0.207079	0.407683	0.147314	0.157904	0.215214	0.0230948	0	0.340084	1	0.641512	0.0495056	0.0113257	0.0100301	0.397371	0.81155	1	0.950875	0	0	0.00427071
Synpcc7942_1064		type I restriction-modification	0	0.112436	0.17018	0.157283	0.500081	0.481019	0.724629	0.20417	0.448465	0.323498	0.249541	0.216226	0.287997	0.396045	0.590825	0.477409	0.196254	0.162645	0.150085	0.237804	0.367906	0.53977	1	0.208139	0.292064	0.543127	0.710964	0.447262	0.497098	0.565517	0.169077	0.138389	0.42873	1	0.382533	0	0.144986	0	0.392071	0.637879	1	0.830967	0.439798	0.227486	0.496699
Synpcc7942_2461		hypothetical protein	0.00900257	0.00459117	0.0173088	0.0908399	0.266273	0.377745	0.492704	0.373742	0.244573	0.137947	0.100042	0.132749	0.337564	0.366947	0.420494	0.0120755	0	0.00203753	0.0395137	0.149601	0.253542	0.364352	1	0.12999	0.297656	0.384601	0.436352	0.250186	0.220623	0.314733	0.0575507	0	0.367781	1	0.550421	0.0699329	0	0.040094	0.442956	0.774552	1	0.711461	0.0280321	0.0222744	0.0131578
Synpcc7942_0069		hypothetical protein	0.00566335	0.00934523	0.0129542	0.0192193	0.107273	0.155176	0.192859	0.146373	0.0832256	0.0129982	0.00493382	0.00613687	0.076103	0.166025	0.183032	0.0125798	0.0023628	0	0.00186336	0.0124423	0.0364491	0.101711	1	0.010783	0.0667227	0.181326	0.289804	0.0533665	0.0318467	0.0709757	0.170452	0	0.275078	1	0.514052	0.141799	0.345555	0.0981924	0.807377	0.229287	1	0.593017	0.0975042	0.0298541	0
Synpcc7942_1776		hypothetical protein	0	0.0704159	0.0646634	0.0601618	0.198343	0.289314	0.250566	0.141353	0.180123	0.00682715	0.00966477	0.0165538	0.321031	0.353795	0.241283	0.0159512	0.0132283	0.000246824	0.0184022	0.0368097	0.0636764	0.186121	1	0.0202324	0.213443	0.270231	0.599295	0.0186937	0.0697285	0.0550766	0.0560282	0.18498	0.440277	1	0.44174	0	0.151125	0.189194	0.382542	0	0.674244	1	0.472083	0.533768	0.505379
Synpcc7942_0677	pex	transcriptional regulator, PadR family	0.032246	0.0397704	0.0470743	0.0658292	0.125864	0.164091	0.17298	0.123631	0.117596	0.0181739	0.00444595	0.00967365	0.0774236	0.0936163	0.118178	0.0425215	0	0.00260413	0.00592102	0.0210045	0.05703	0.108687	1	0.0272851	0.134429	0.227837	0.283438	0.0379603	0.0439737	0.0656725	0.0874769	0	0.8508	1	0.753655	0.426703	0.0763646	0	1	0.661343	0.250604	0.521285	0.249808	0.277408	0.0712407
Synpcc7942_1396		hypothetical protein	0.00467673	0.0320957	0.05373	0.120419	0.264792	0.222193	0.259039	0.235436	0.228894	0.0634871	0.0384116	0.0400681	0.231943	0.245979	0.26195	0.0662324	0	0.00406647	0.0135617	0.0697403	0.0936402	0.178864	1	0.0638297	0.244826	0.389249	0.374807	0.147044	0.158329	0.16333	0.144045	0	0.679624	1	0.742003	0.289663	0.119178	0.0372086	1	0.524165	0.534244	0.573959	0.276975	0.0938547	0.0639835
Synpcc7942_2301		hypothetical protein	0.00350709	0.0532315	0.0564179	0.0761176	0.136999	0.182295	0.202536	0.230783	0.121168	0.0298877	0.0306115	0.0207441	0.134283	0.194401	0.233492	0.0352668	0.0066505	0	0.00633334	0.0179026	0.0571156	0.131218	1	0.0240147	0.124079	0.278834	0.41893	0.0689024	0.0393955	0.0676192	0	0.41723	0.604974	1	0.308843	0.11892	0	0.177302	1	0.368616	0.746504	0.324991	0.636076	0.113555	0.306242
Synpcc7942_0499		hydroxyneurosporene-O-methyltransferase	0.0110148	0.0159163	0.0300307	0.0543262	0.235528	0.401099	0.444938	0.436402	0.182929	0.033328	0.018297	0.014784	0.192528	0.450309	0.602455	0.0260569	0	0.0111358	0.0070797	0.0494806	0.111398	0.323213	1	0.0488126	0.169007	0.394266	0.663975	0.286227	0.139334	0.213531	0	0.0356124	0.235327	1	0.596042	0.092299	0	0.0267565	0.940746	0.307492	0.896516	1	0.318225	0.293726	0.380388
Synpcc7942_1636	dcoHI, phhB, dcoH	pterin-4-alpha-carbinolamine dehydratase	0.0541756	0.0346843	0.087685	0.131232	0.189814	0.286872	0.31475	0.339445	0.197971	0.0477937	0.012305	0.00744098	0.173153	0.404277	0.43556	0.341946	0	0.0542745	0.0972049	0.113019	0.20651	0.391983	1	0.122038	0.32887	0.56682	0.72402	0.609622	0.192277	0.222591	0.191635	0.378448	0.344174	1	0.711193	0	0.0933397	0	1	0.61517	0.715344	0.873508	0.365887	0.249698	0.411258
Synpcc7942_2254		hypothetical protein	0.0140313	0.00378667	0.00395511	0.00697439	0.0336584	0.0833669	0.118761	0.0775664	0.028438	0.00509979	0.00329201	0.00255922	0.0194117	0.0371686	0.0785898	0.0199763	0.000706759	0	5.94297e-05	0.00305914	0.0107459	0.0464494	1	0.00329931	0.0168797	0.0486398	0.162982	0.022533	0.0161319	0.0299512	0.0347887	0	0.13447	1	0.405222	0.0139665	0.175522	0.180307	0.357174	0.380684	1	0.862826	0.162122	0.200538	0.0147161
Synpcc7942_2192		diguanylate cyclase (GGDEF domain)	0.0339051	0.0568851	0.0393734	0.0478015	0.257441	0.409714	0.418134	0.354015	0.221945	0.147604	0.0965115	0.047752	0.119069	0.212503	0.321888	0.182659	0.0482913	0.0210237	0	0.0239557	0.0750208	0.220274	1	0.0217566	0.045268	0.159151	0.385838	0.158342	0.1909	0.200703	0.0181443	0	0.0160812	1	0.456095	0.105302	0.0590845	0.243111	0	1	0.85736	0.730509	0.385751	0.42997	0.313553
Synpcc7942_1019	malQ	4-alpha-glucanotransferase	0.0638306	0.0471282	0.112521	0.177624	0.21422	0.325949	0.331993	0.264468	0.209408	0.0285353	0.0187516	0	0.181081	0.356692	0.37583	0.062523	0.0414422	0.101815	0.0300133	0.0635214	0.151054	0.278929	1	0.118052	0.191082	0.310347	0.567402	0.215491	0.113886	0.18897	0.120401	0	1	0.88629	0.605544	0.143682	0.274861	0.217234	1	0.651427	0.84441	0.556027	0.325597	0	0.549385
Synpcc7942_0705		hypothetical protein	0.0114226	0.0475728	0.0573989	0.0650132	0.187323	0.394501	0.374808	0.296542	0.157105	0.0489141	0.0443086	0.0306239	0.117646	0.344911	0.525197	0.0624485	0	0.00743498	0.010321	0.0349291	0.112803	0.288262	1	0.0337371	0.132472	0.312806	0.57126	0.263261	0.153058	0.248652	0.141848	0.230712	0.36564	1	0.656973	0	0.239451	0.128745	0.565143	0.263863	0.579283	1	0.340127	0	0.258378
Synpcc7942_0590		membrane protein-like	0	0.249584	0.26043	0.197704	0.324497	0.516886	0.634506	0.462269	0.364305	0.666967	0.280362	0.254936	0.11363	0.25909	0.424759	0.173407	0.325135	0.217851	0.29524	0.234507	0.255643	0.449511	1	0.276258	0.181528	0.246858	0.439977	0.280067	0.298027	0.366521	0.303701	0	0.378168	1	0.435182	0.252683	1	0.342653	0	0.448504	0.79115	0.358646	0.802564	0.800966	0.624581
Synpcc7942_1696		hypothetical protein	0.0789458	0.0153068	0.0308038	0.0764925	0.220574	0.357755	0.387917	0.312406	0.149088	0.101612	0.0773545	0.0304896	0.129293	0.269796	0.281975	0.203613	0	0.019519	0.0240591	0.0774173	0.15618	0.306213	1	0.067255	0.15328	0.181313	0.467096	0.22161	0.196577	0.15186	0.181224	0.239581	0	1	0.943166	0.0719491	0.315532	0	0.716354	1	0.730418	0.755453	0.366047	0.390571	0.472713
Synpcc7942_0355	rbfA	ribosome-binding factor A	0	0.129051	0.129147	0.148765	0.254479	0.270203	0.335391	0.338415	0.18354	0.14893	0.132911	0.0978689	0.173109	0.242355	0.355341	0.0080242	0.158891	0.13029	0.123213	0.119805	0.174718	0.350096	1	0.137062	0.367497	0.351334	0.439054	0.123096	0.168776	0.268067	0.472476	0.31981	0	1	0.476203	0.218427	0.0556653	0.0355361	0.3544	0.140127	1	0.918084	0.430065	0	0.147814
Synpcc7942_1419	chlL, bchL	protochlorophyllide reductase iron-sulfur ATP-binding protein	0.000637057	0.0910466	0.119498	0.154999	0.18907	0.2624	0.302111	0.232654	0.168121	0.0370606	0.049741	0.0599189	0.325807	0.326899	0.279877	0	0.00718175	0.0143337	0.031914	0.0942877	0.175769	0.255563	1	0.0782737	0.252676	0.299005	0.36291	0.122001	0.138798	0.204095	0.0330491	0	0.334073	1	0.584775	0.201895	0	0.0686534	0.240545	0.784388	1	0.710829	0.214727	0.15332	0.118704
Synpcc7942_2404		hypothetical protein	0.0628987	0.129037	0.170459	0.137951	0.202129	0.306893	0.322591	0.307897	0.200211	0	0.000734545	0.0271203	0.20589	0.293333	0.364187	0.067862	0.0148485	0.0913975	0.0677809	0.0853355	0.13047	0.247795	1	0.077972	0.247443	0.353984	0.54459	0.2044	0.0621013	0.14165	0.13269	0.103084	0.147973	1	0.612911	0	0.319695	0.14691	1	0.227133	0	0.635018	0.516234	0.415433	0.624726
Synpcc7942_0423		hypothetical protein	0.04968	0.0860078	0.0589214	0.0768525	0.261923	0.318305	0.292405	0.28793	0.204587	0.020764	0.0227741	0.0269313	0.194972	0.299618	0.294522	0.10331	0.0173162	0	0.0266156	0.0953929	0.152571	0.305247	1	0.0698782	0.408904	0.482549	0.573091	0.145749	0.121508	0.175244	0.179244	0.206365	0	1	0.468881	0.0253361	0.270158	0.0642694	0.403187	0.438033	0.595174	1	0.245257	0	0.183815
Synpcc7942_1865	ppnK	inorganic polyphosphate/ATP-NAD kinase	0.0250917	0.0610054	0	0.0510382	0.232792	0.331391	0.36469	0.327681	0.171536	0.114467	0.122821	0.0936368	0.135028	0.209823	0.299152	0.0386366	0.019203	0.0138877	0.022752	0.0419842	0.0894124	0.243233	1	0.00927012	0.0856769	0.133848	0.402953	0.111067	0.173265	0.196965	0.170833	0.230623	0.117411	0.87202	1	0	0.564902	0.564787	0.349189	0.506066	1	0.858493	0.0418766	0	0.480693
Synpcc7942_0291		hypothetical protein	0.00733666	0.187312	0.141046	0.152563	0.277543	0.322956	0.313385	0.473766	0.232222	0.0478882	0.0412641	0.101732	0.293963	0.236656	0.225076	0	0.0596678	0.0109589	0.0763644	0.141429	0.173054	0.260693	1	0.104271	0.540331	0.389879	0.304636	0.0520102	0.0907488	0.174626	0.155717	0	0.231805	0.970814	1	0.127033	0.0917167	0.143742	0.599871	0.566626	0.724369	1	0.0419993	0.0422222	0
Synpcc7942_1661	digA	hypothetical protein	0.0105774	0.00754131	0.00837564	0.0150237	0.0583249	0.21911	0.369444	0.237985	0.0611067	0.0172786	0.00630606	0.00954252	0.0542132	0.0646059	0.0950507	0.0104411	0.00370158	0	0.00158901	0.00264386	0.00524824	0.0184963	1	0.00315282	0.0197325	0.0409342	0.133572	0.0432166	0.0209509	0.0217618	0.0183174	0	0.100163	1	0.336014	0.0468865	0.119874	0.150793	0.515777	0.323426	0.436751	1	0.0745647	0.0700991	0.0133536
Synpcc7942_2554	hoxW	hypothetical protein	0.0180434	0.0253202	0.0312921	0.0581729	0.266624	0.376855	0.388471	0.36218	0.203935	0.0682229	0.0203573	0.0182726	0.177436	0.332117	0.403852	0.0201846	0.00232047	0	0.0101944	0.0472886	0.121171	0.288599	1	0.0422421	0.144054	0.320806	0.505788	0.153481	0.119756	0.167483	0	0.0871019	0.503188	1	0.911337	0.090025	0.113981	0.197707	0.411036	0.551345	0.876154	1	0.103595	0	0.0281654
Synpcc7942_1040		hypothetical protein	0.0081113	0.0258756	0.0305843	0.0423538	0.156274	0.245928	0.252833	0.227005	0.117252	0.0275034	0.0136881	0.0195319	0.160959	0.271717	0.304998	0.0187038	0	0.00801312	0.0133655	0.0278917	0.0727707	0.201695	1	0.0262171	0.141345	0.278307	0.447799	0.0862766	0.0741849	0.140805	0	0.119981	0.539807	1	0.816256	0.304523	0.410607	0.244049	0.665256	0.780641	0.577952	1	0.210315	0.180173	0
Synpcc7942_0529	nagB, devB, pgl	6-phosphogluconolactonase	0.0282964	0.0264089	0	0.00871926	0.21176	0.321508	0.392571	0.253426	0.173247	0.139661	0.085478	0.107544	0.209779	0.328031	0.338163	0.227638	0.0606686	0.0478901	0.0691169	0.120581	0.200026	0.35162	1	0.0898591	0.25378	0.266898	0.546672	0.189848	0.256476	0.280721	0	0.321048	0.531156	1	0.927857	0.0121626	0.259974	0.0641895	0.757795	0.632222	1	0.59927	0.643963	0.205844	0.139859
Synpcc7942_2253		Glutamate--cysteine ligase, putative	0.0674514	0.0305363	0.0050328	0.0273691	0.0858511	0.149537	0.181071	0.117086	0.0528018	0.0199956	0.00277323	0.00916444	0.037972	0.0617115	0.141208	0.106478	0.00207814	0	0.0100381	0.0135507	0.0428859	0.0960181	1	0.00253124	0.0650657	0.108861	0.247847	0.0648079	0.0468146	0.0837464	0	0.217776	0.0182379	1	0.268152	0.122313	0	0.168732	0.636822	0.628785	1	0.330289	0.177579	0.0689358	0.0892473
Synpcc7942_0963		probable methyltransferase	0.135196	0.220671	0.128725	0.0808046	0.189473	0.253073	0.329604	0.302297	0.152188	0.106256	0.106222	0.0859259	0.122002	0.203693	0.173101	0.218846	0.127925	0.0406754	0.0471431	0.0513274	0.0601391	0.154974	1	0	0.106653	0.189112	0.306346	0.0656235	0.096672	0.126265	1	0.781193	0	0.883043	0.420028	0.781202	1	0.885672	0.4174	0.178181	0.720993	0.653795	0.212216	0.0449038	0.630254
Synpcc7942_0477	ylmG, ycf19	conserved hypothetical protein YCF19	0	0.174405	0.244798	0.29145	0.353944	0.385126	0.487898	0.184355	0.371713	0.272167	0.287205	0.25111	0.353763	0.398205	0.460899	0.142144	0.201173	0.225279	0.292195	0.323642	0.373459	0.478063	1	0.304077	0.488352	0.599459	0.579432	0.270959	0.319269	0.395639	0.766569	1	0.387669	0.883987	0.190793	0	0.211223	0	0.311266	0.57301	0.838749	0.53596	0.907233	0.715422	0.550498
Synpcc7942_1416	topA	DNA topoisomerase I	0.173982	0.0788235	0.00288119	0	0.13652	0.301058	0.357315	0.305339	0.12644	0.140571	0.1068	0.115515	0.156675	0.322657	0.395882	0.489764	0.18563	0.114432	0.123796	0.10915	0.166187	0.32885	1	0.115746	0.169493	0.23196	0.463151	0.209727	0.278832	0.311982	0.263517	0.15379	0.0557968	1	0.304495	0	0.796644	0.564443	0	0.319545	0.435988	1	0.2361	0.081965	0.271778
Synpcc7942_1871		hypothetical protein	0	0.0621246	0.121846	0.166931	0.482233	0.408231	0.518808	0.191933	0.505435	0.241902	0.159083	0.133123	0.371906	0.477543	0.457264	0.162597	0.0628127	0.0663225	0.0589018	0.11211	0.227727	0.345161	1	0.104632	0.181107	0.328176	0.512504	0.261454	0.284619	0.253499	0	0.0193125	0.151094	1	0.343008	0.0279902	0	0.232783	0.761092	0.79474	1	0.578101	0.422407	0.619071	0.189748
Synpcc7942_1499	petF, petF1, petFI, fedI	Ferredoxin (2Fe-2S)	0.0549087	0.606633	0.507192	0.44088	0.578937	0.799939	0.822605	0.818051	0.464417	0.40063	0.450126	0.507146	0.559243	0.553209	0.588752	0	0.368189	0.345288	0.370751	0.372013	0.447407	0.557897	1	0.36688	0.622555	0.467518	0.412442	0.286097	0.347868	0.427748	0.271276	0.493359	0	1	0.768304	0.244278	0.366905	0.741308	0	0.408996	0.470058	1	0.769807	0.934652	0.980633
Synpcc7942_1057	thiE	thiamine-phosphate pyrophosphorylase	0.156009	0.549138	0.101067	0.228451	0.508193	0.705708	0.649253	0.725661	0.268116	0.359985	0.418105	0.393183	0.319256	0.440449	0.534262	0.0865747	0.253669	0.236965	0.196764	0.205139	0.263585	0.459017	1	0.166876	0.489696	0	0.389583	0.233654	0.355568	0.41262	0.531137	0	0.142512	1	0.342454	0.233824	0.164672	0.110024	0.482788	0.110878	0.730404	1	0.0738367	0.323248	0

## Sheet: Legend
Column	Name	Description
A	Gene ID	Synpcc7942 gene ID
B	Gene name	Gene name
C	Gene description	Gene description from Cyanobase
D-AG	Scaled expression (range from 0 to 1) under Low Light, Clear Day, High Light pulse, and Shade pulse conditions	Quantified gene expression data from the gene under Low Light, Clear Day, High Light pulse, and Shade pulse conditions (see Figure 2 - source data and Figure 3 - source data 1) was normalized such that the range of expression values spanned from 0 to 1.
AH-AM	Scaled expression (range from 0 to 1) under Constant Light conditions	Quantified gene expression data from the gene under Constant Light conditions in a wildtype strain (data from Markson J.S. et al 2013) was normalized such that the range of expression values spanned from 0 to 1.
AH-AM	Scaled expression (range from 0 to 1) under Constant Light conditions in OX-D53E strain (rpaA-, kaiBC-, Ptrc::rpaA(D53E)) with or without induction	Quantified gene expression data from the gene under Constant Light conditions in the OX-D53E strain (rpaA-, kaiBC-, Ptrc::rpaA(D53E)) with or without induction (data from Markson J.S. et al 2013) was normalized such that the range of expression values spanned from 0 to 1.
