# Supplementary figures and images for: Natural changes in light interact with circadian regulation at promoters to control gene expression in cyanobacteria
Source: eLife journal article supplement (doi:10.7554/elife.32032), 2017-12-14

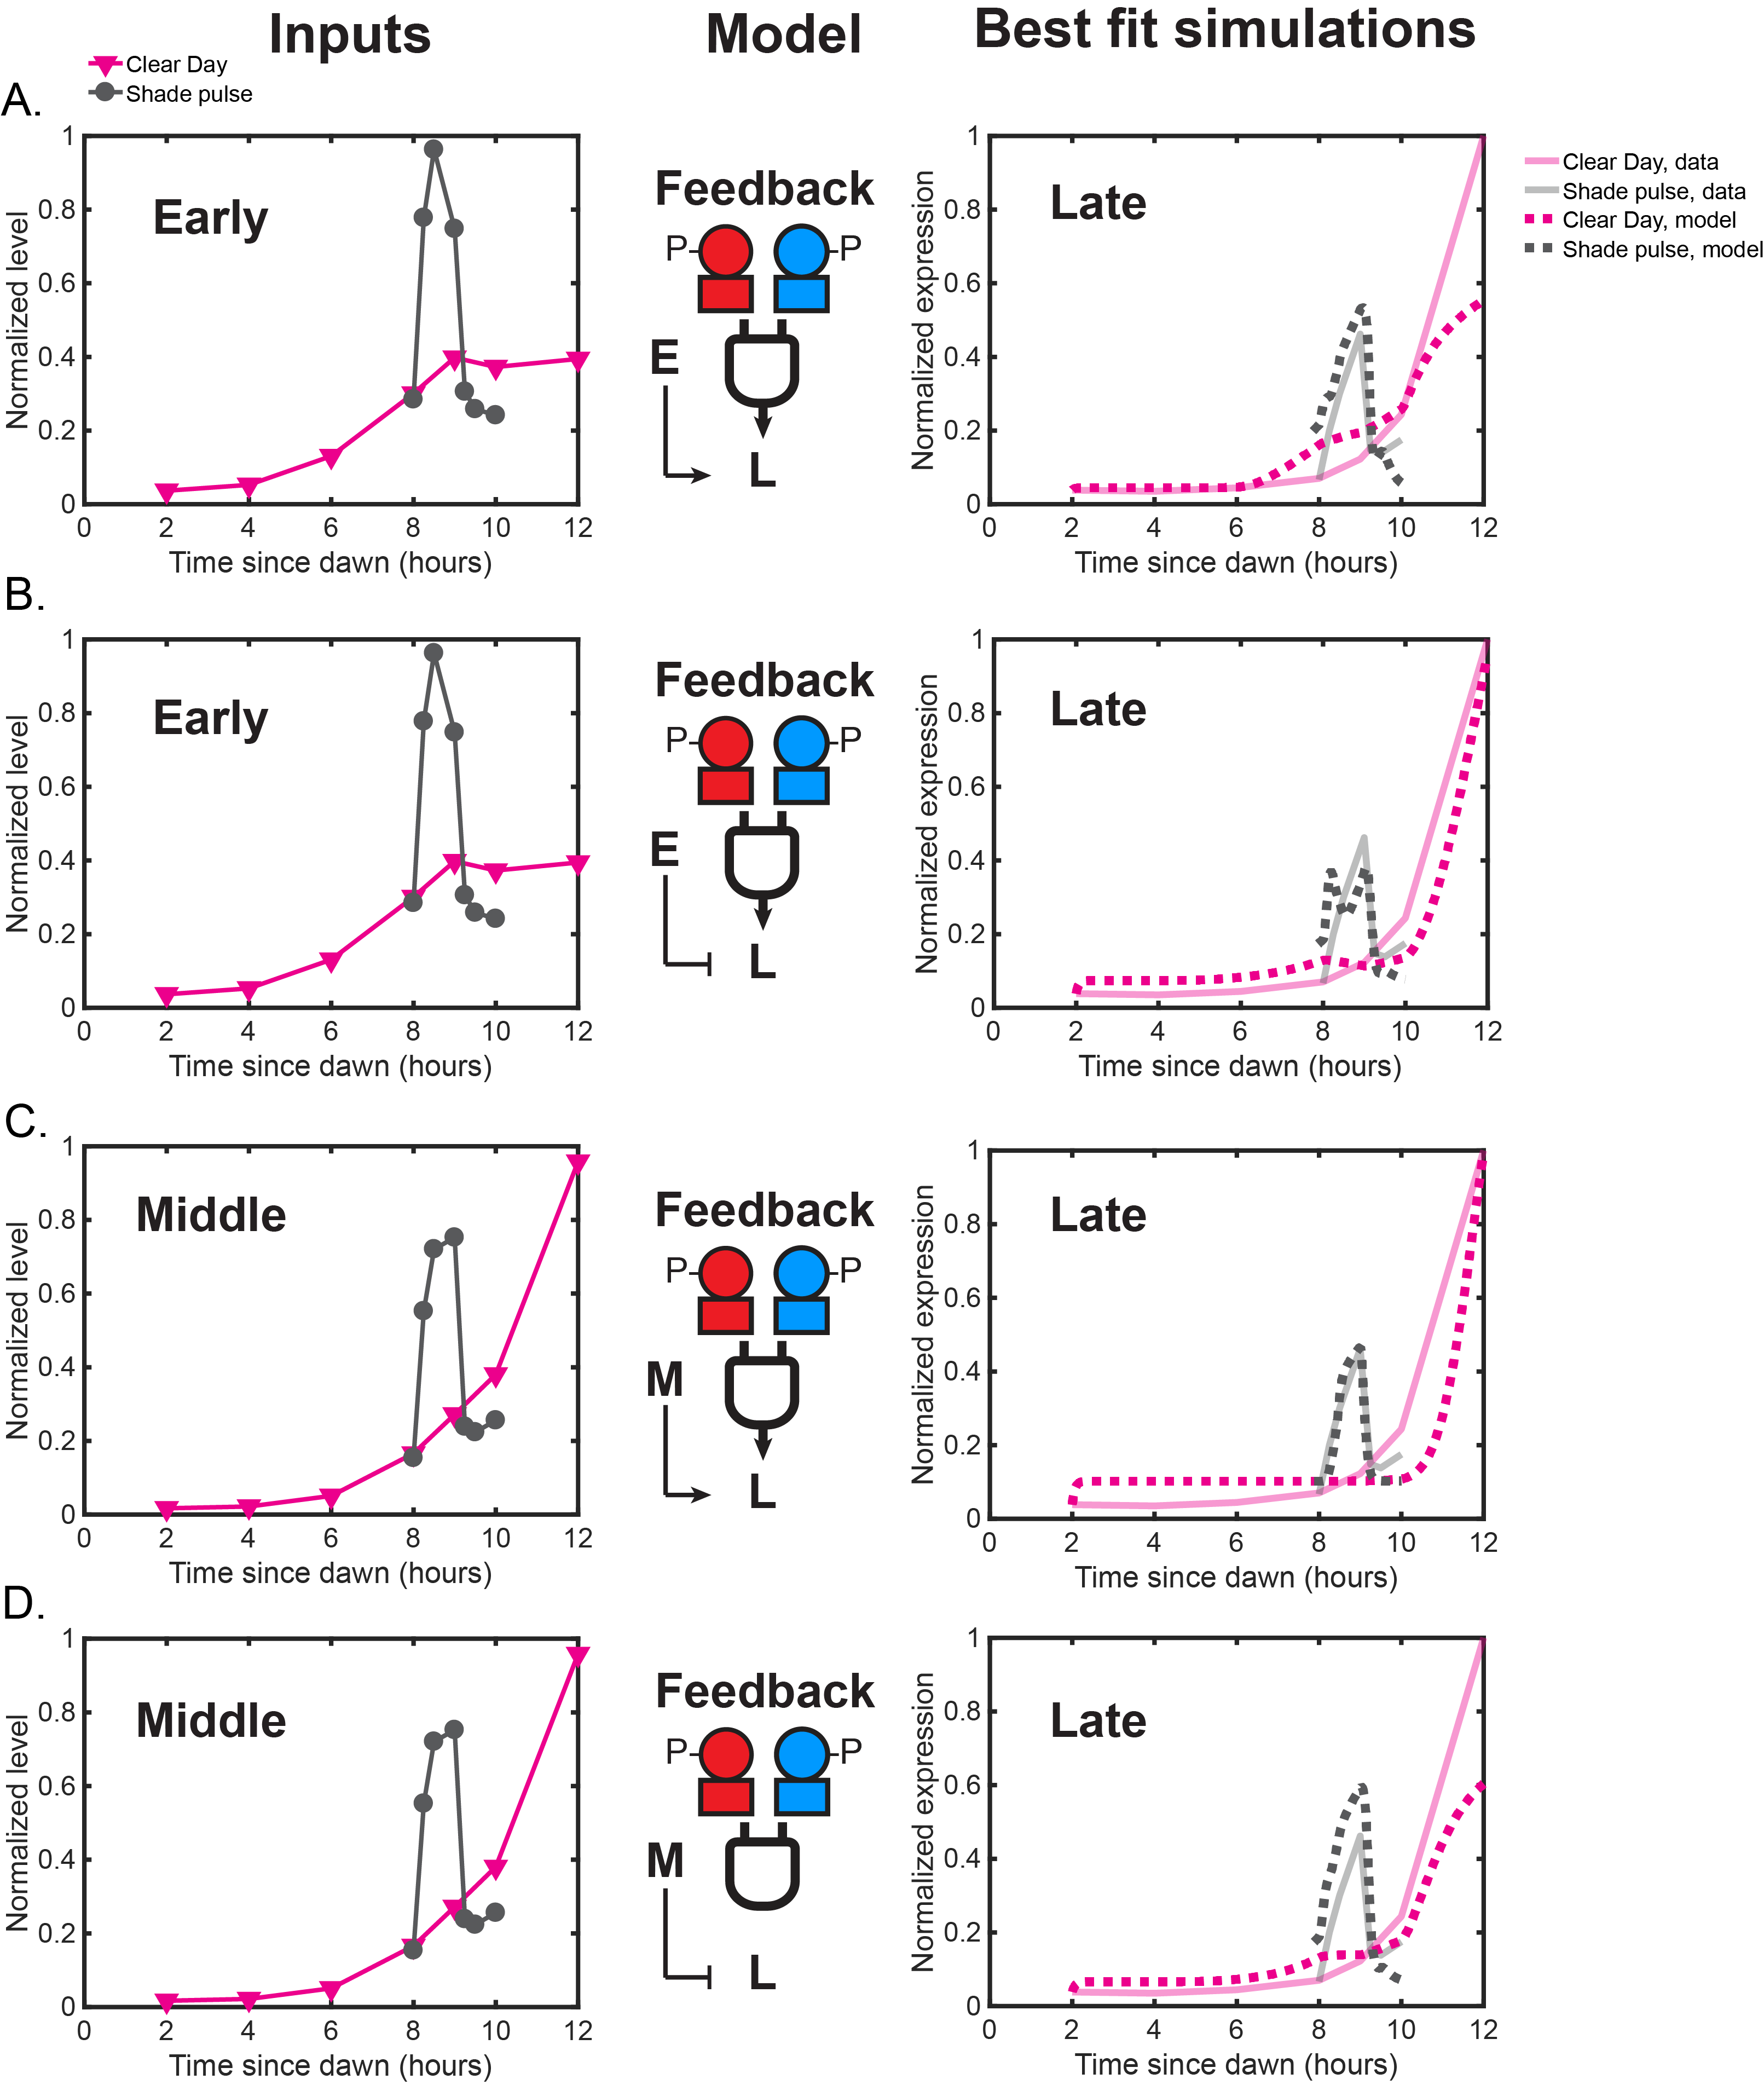

Supplement: supp [file elife-32032-supp-v2.zip › elife_poa_e32032_Figure_8_figure_supplement_4.png]

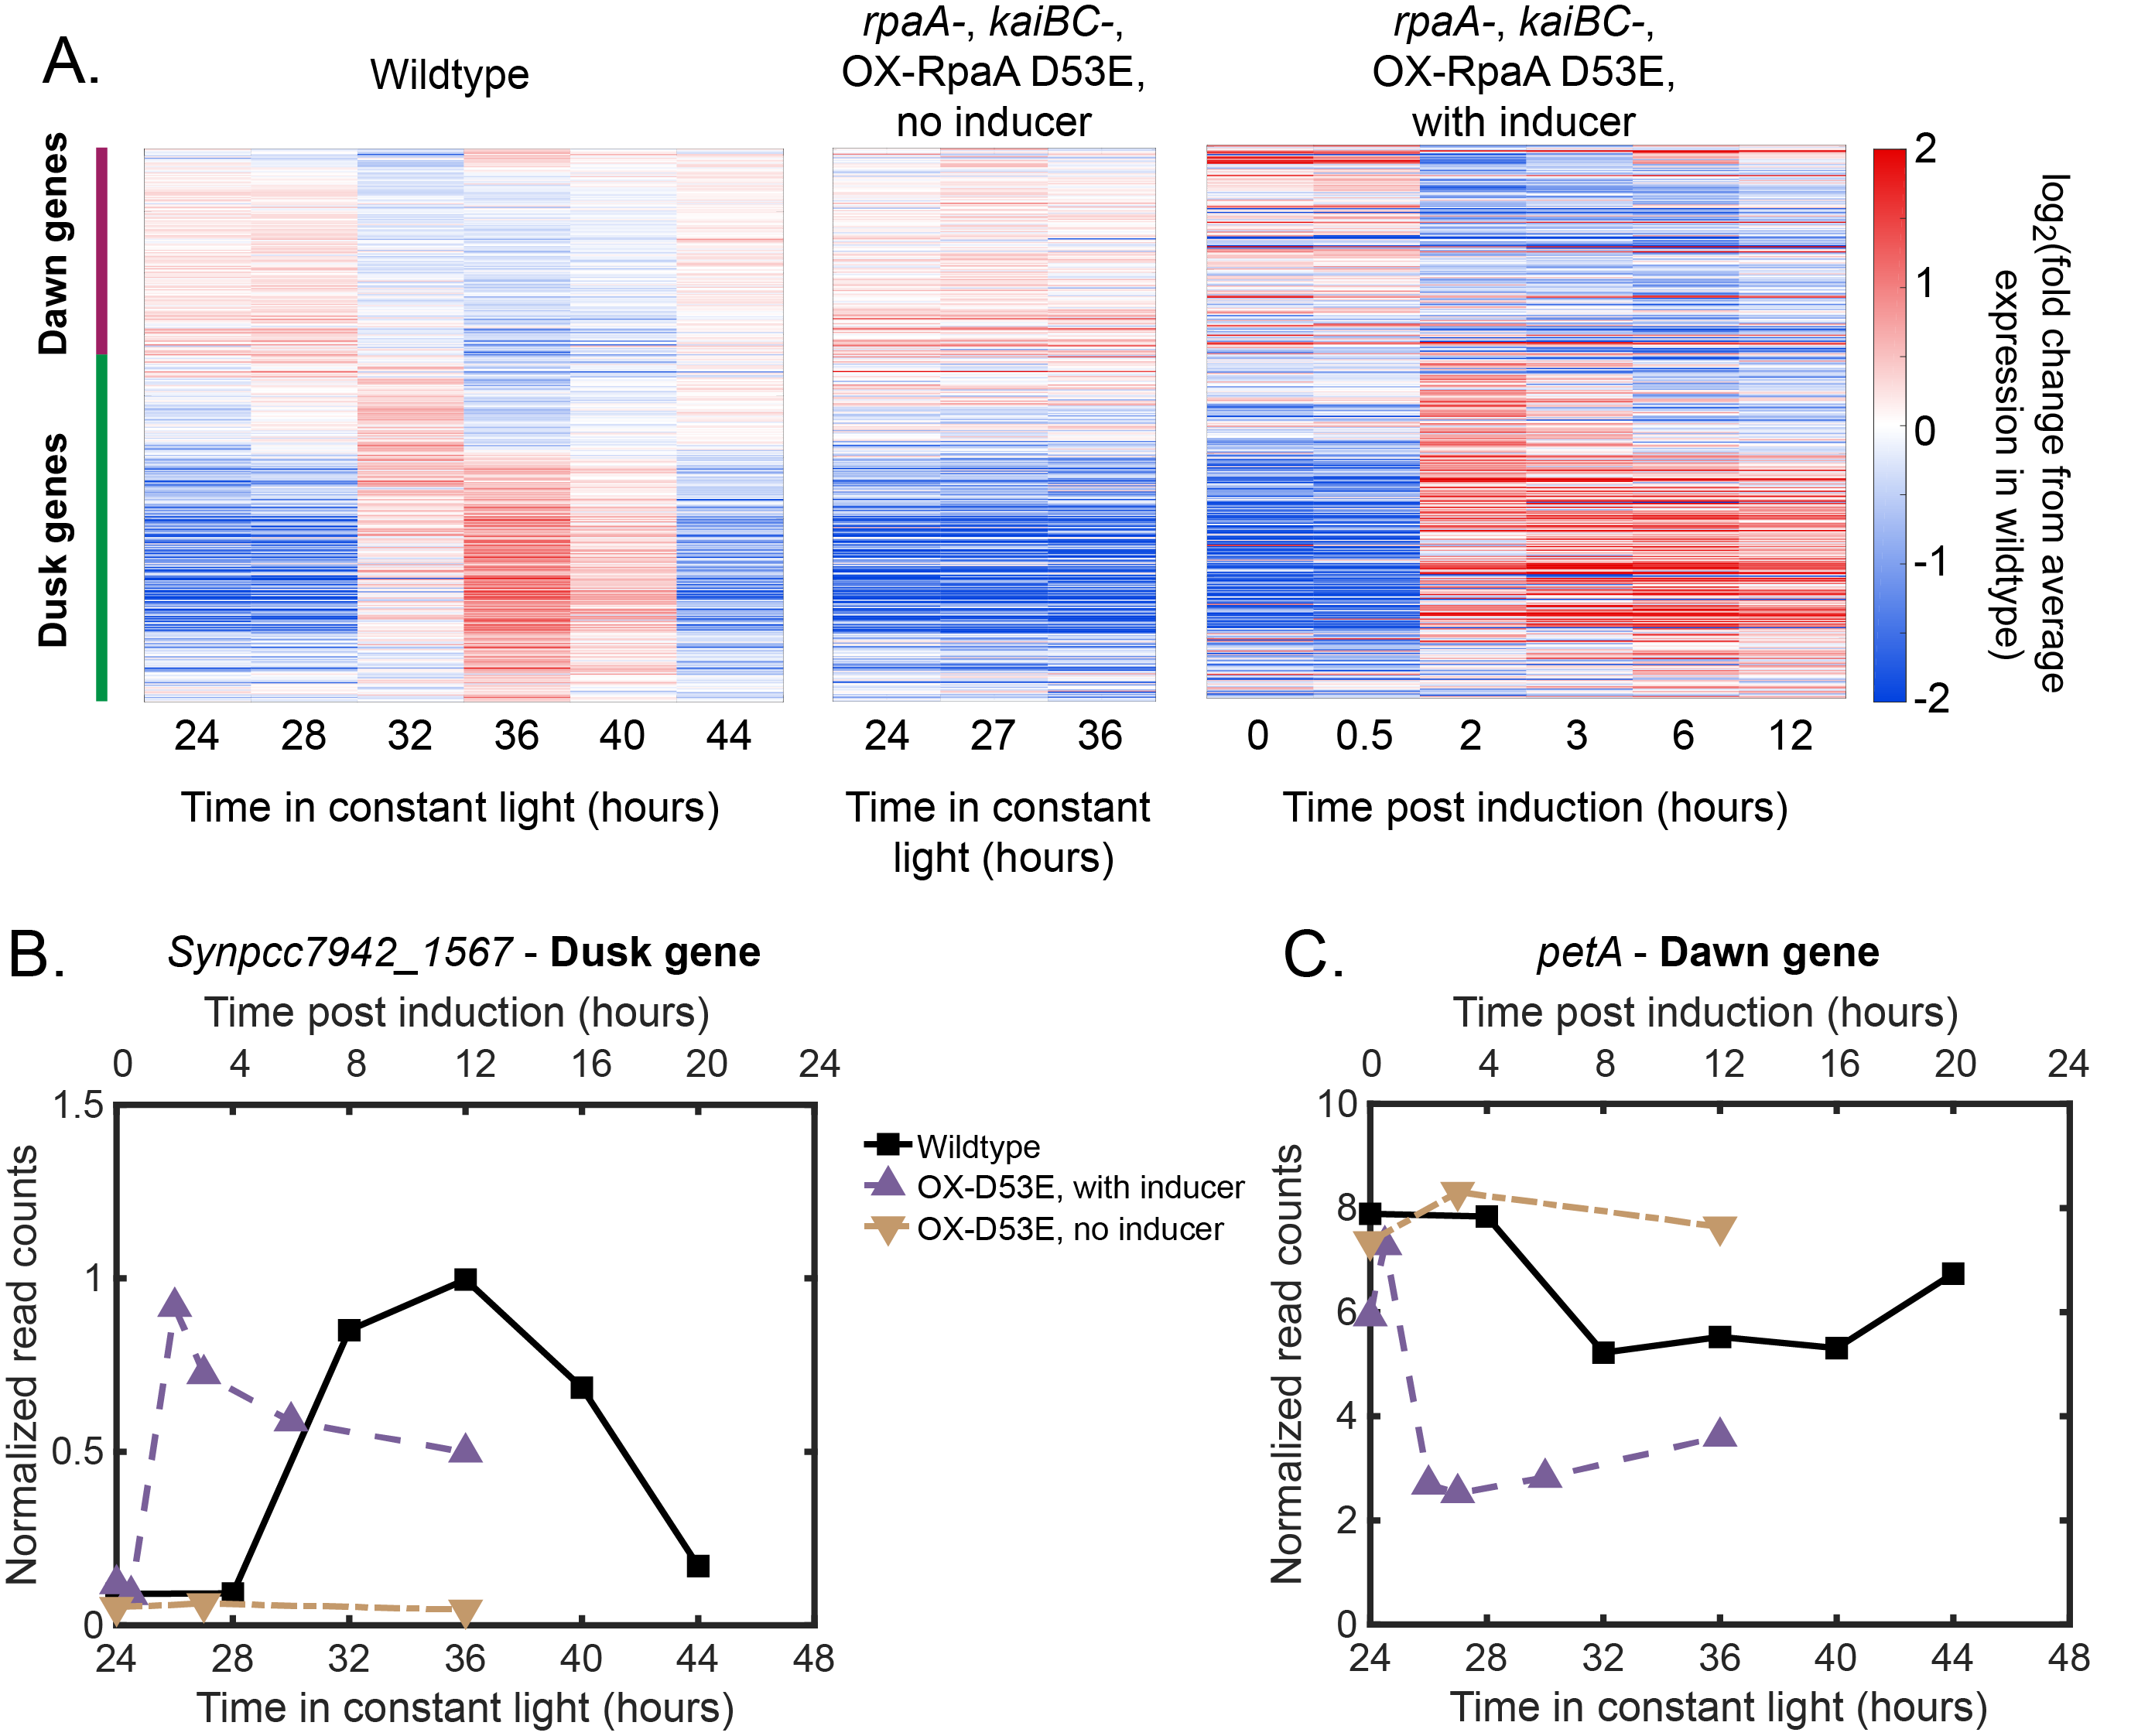

Supplement: supp [file elife-32032-supp-v2.zip › elife_poa_e32032_Figure_2_figure_supplement_2.png]

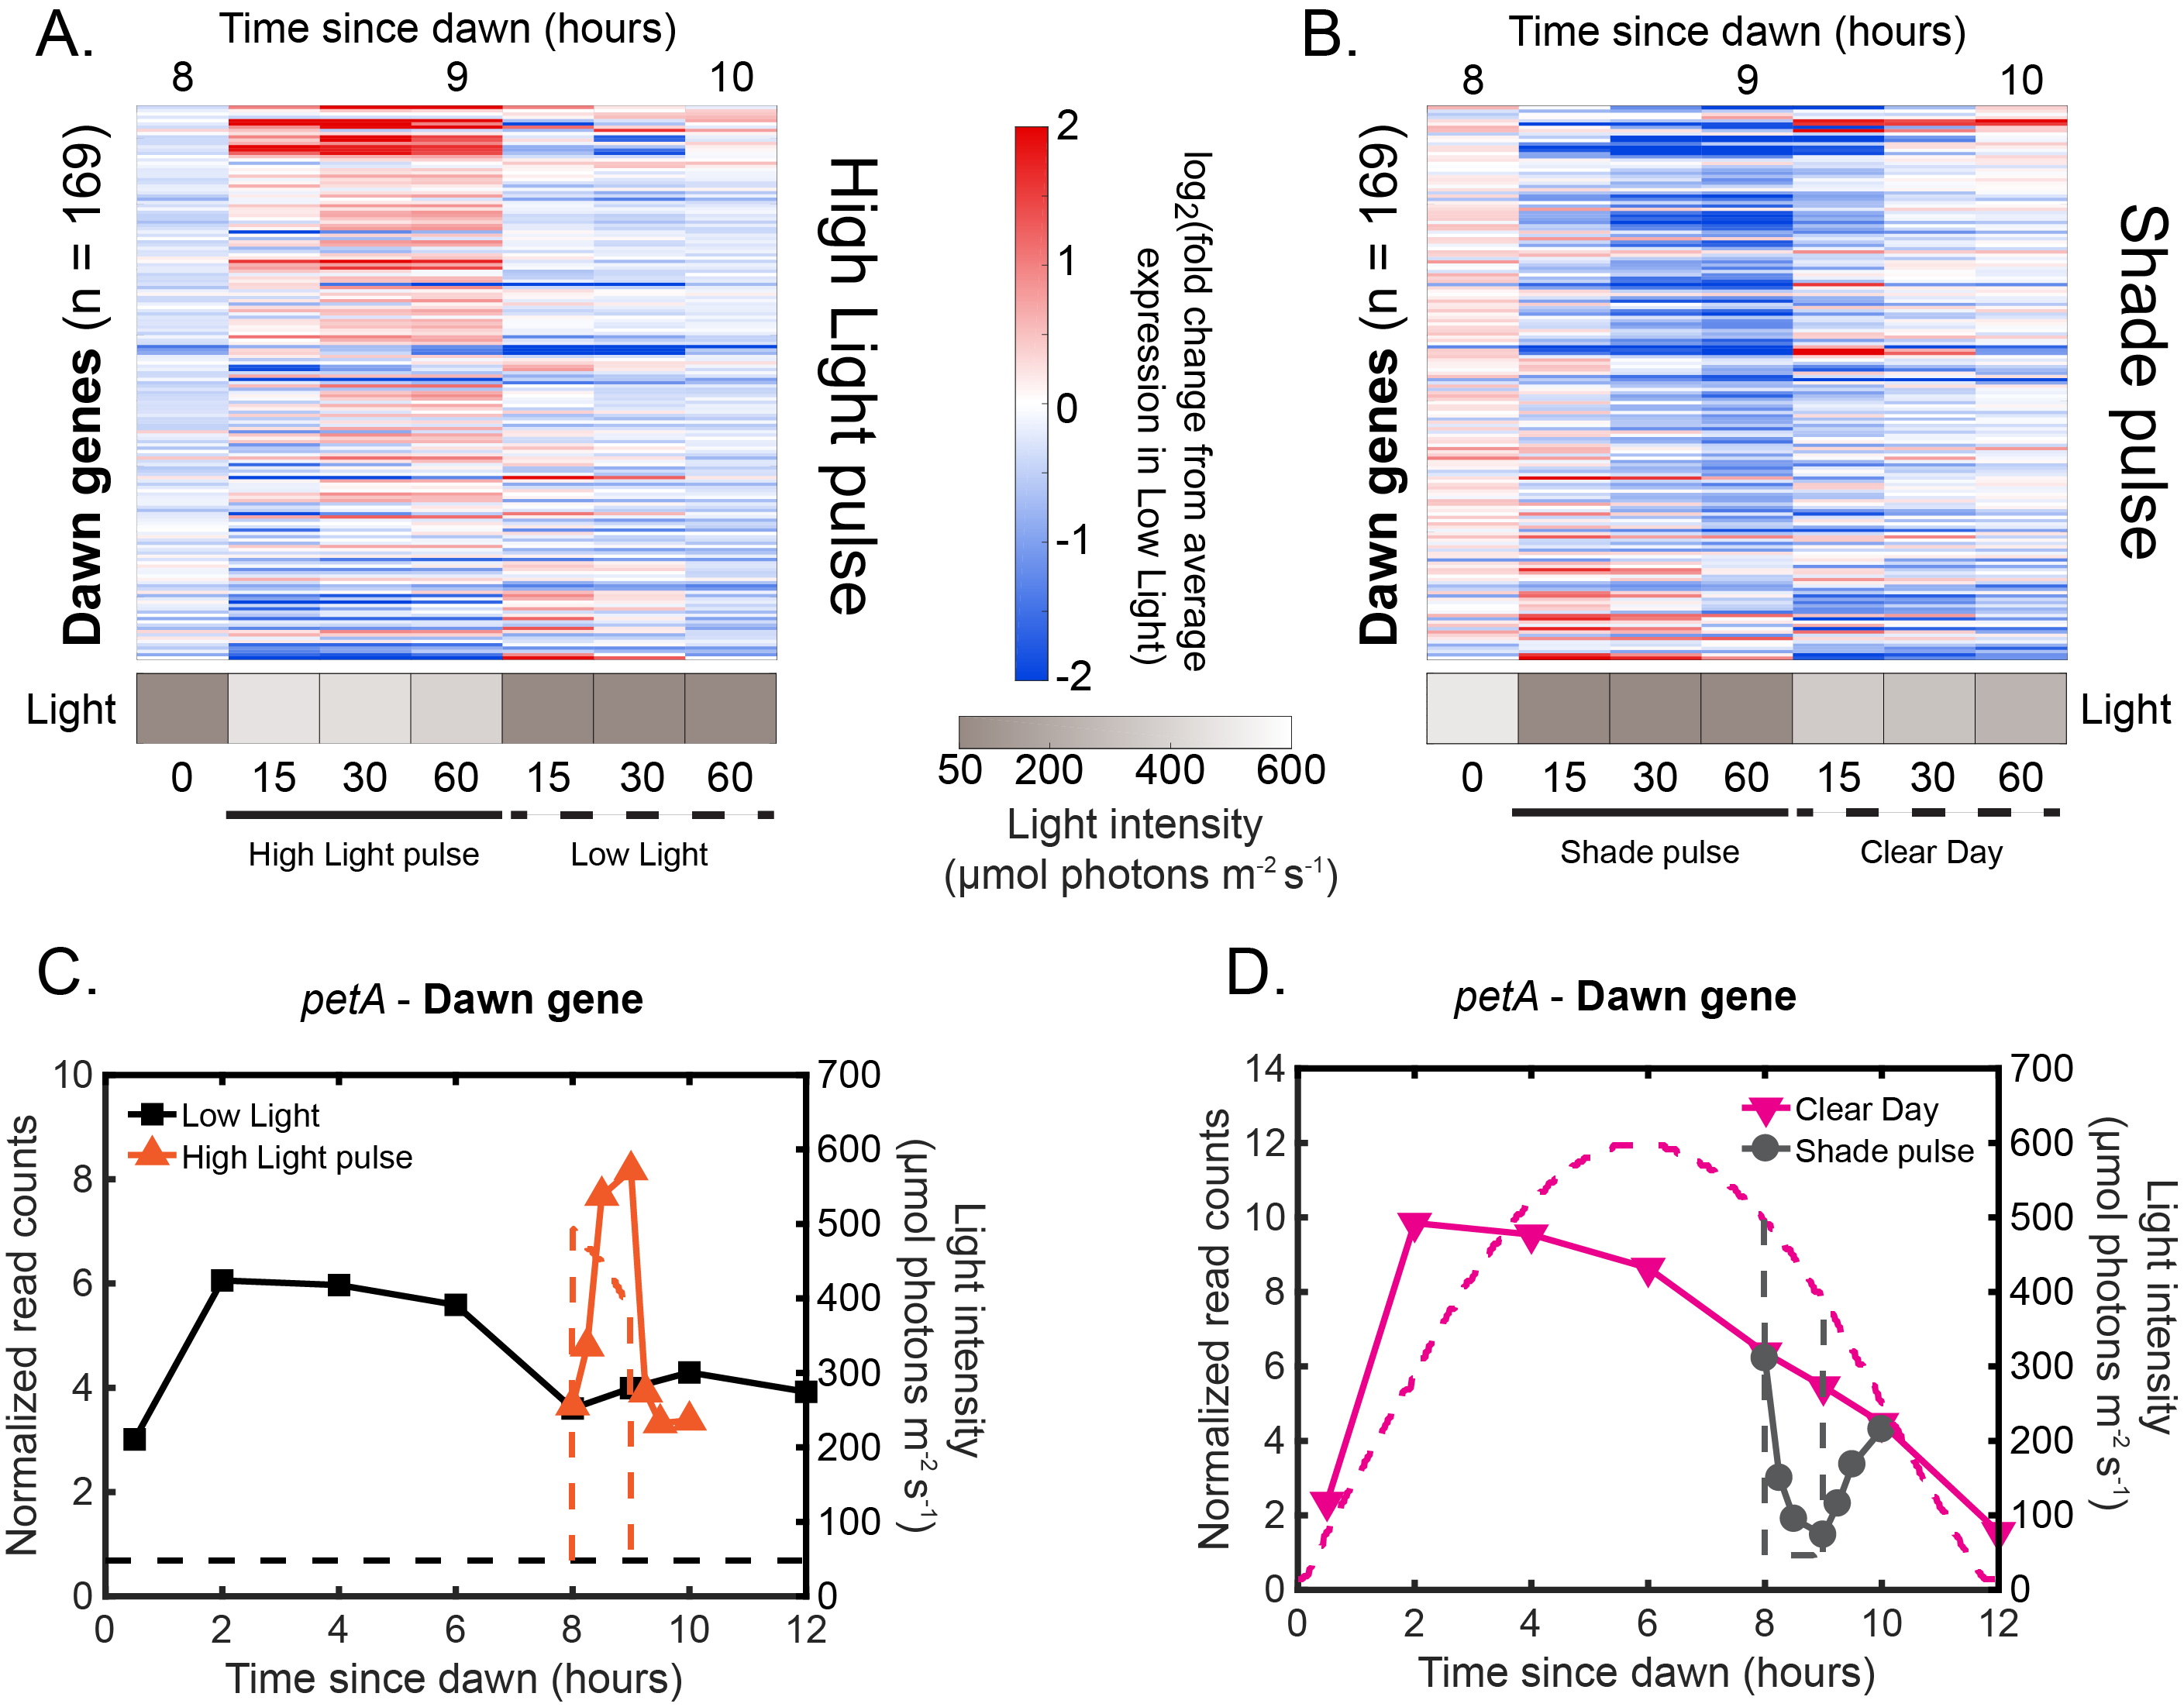

Supplement: supp [file elife-32032-supp-v2.zip › elife_poa_e32032_Figure_3_figure_supplement_1.png]

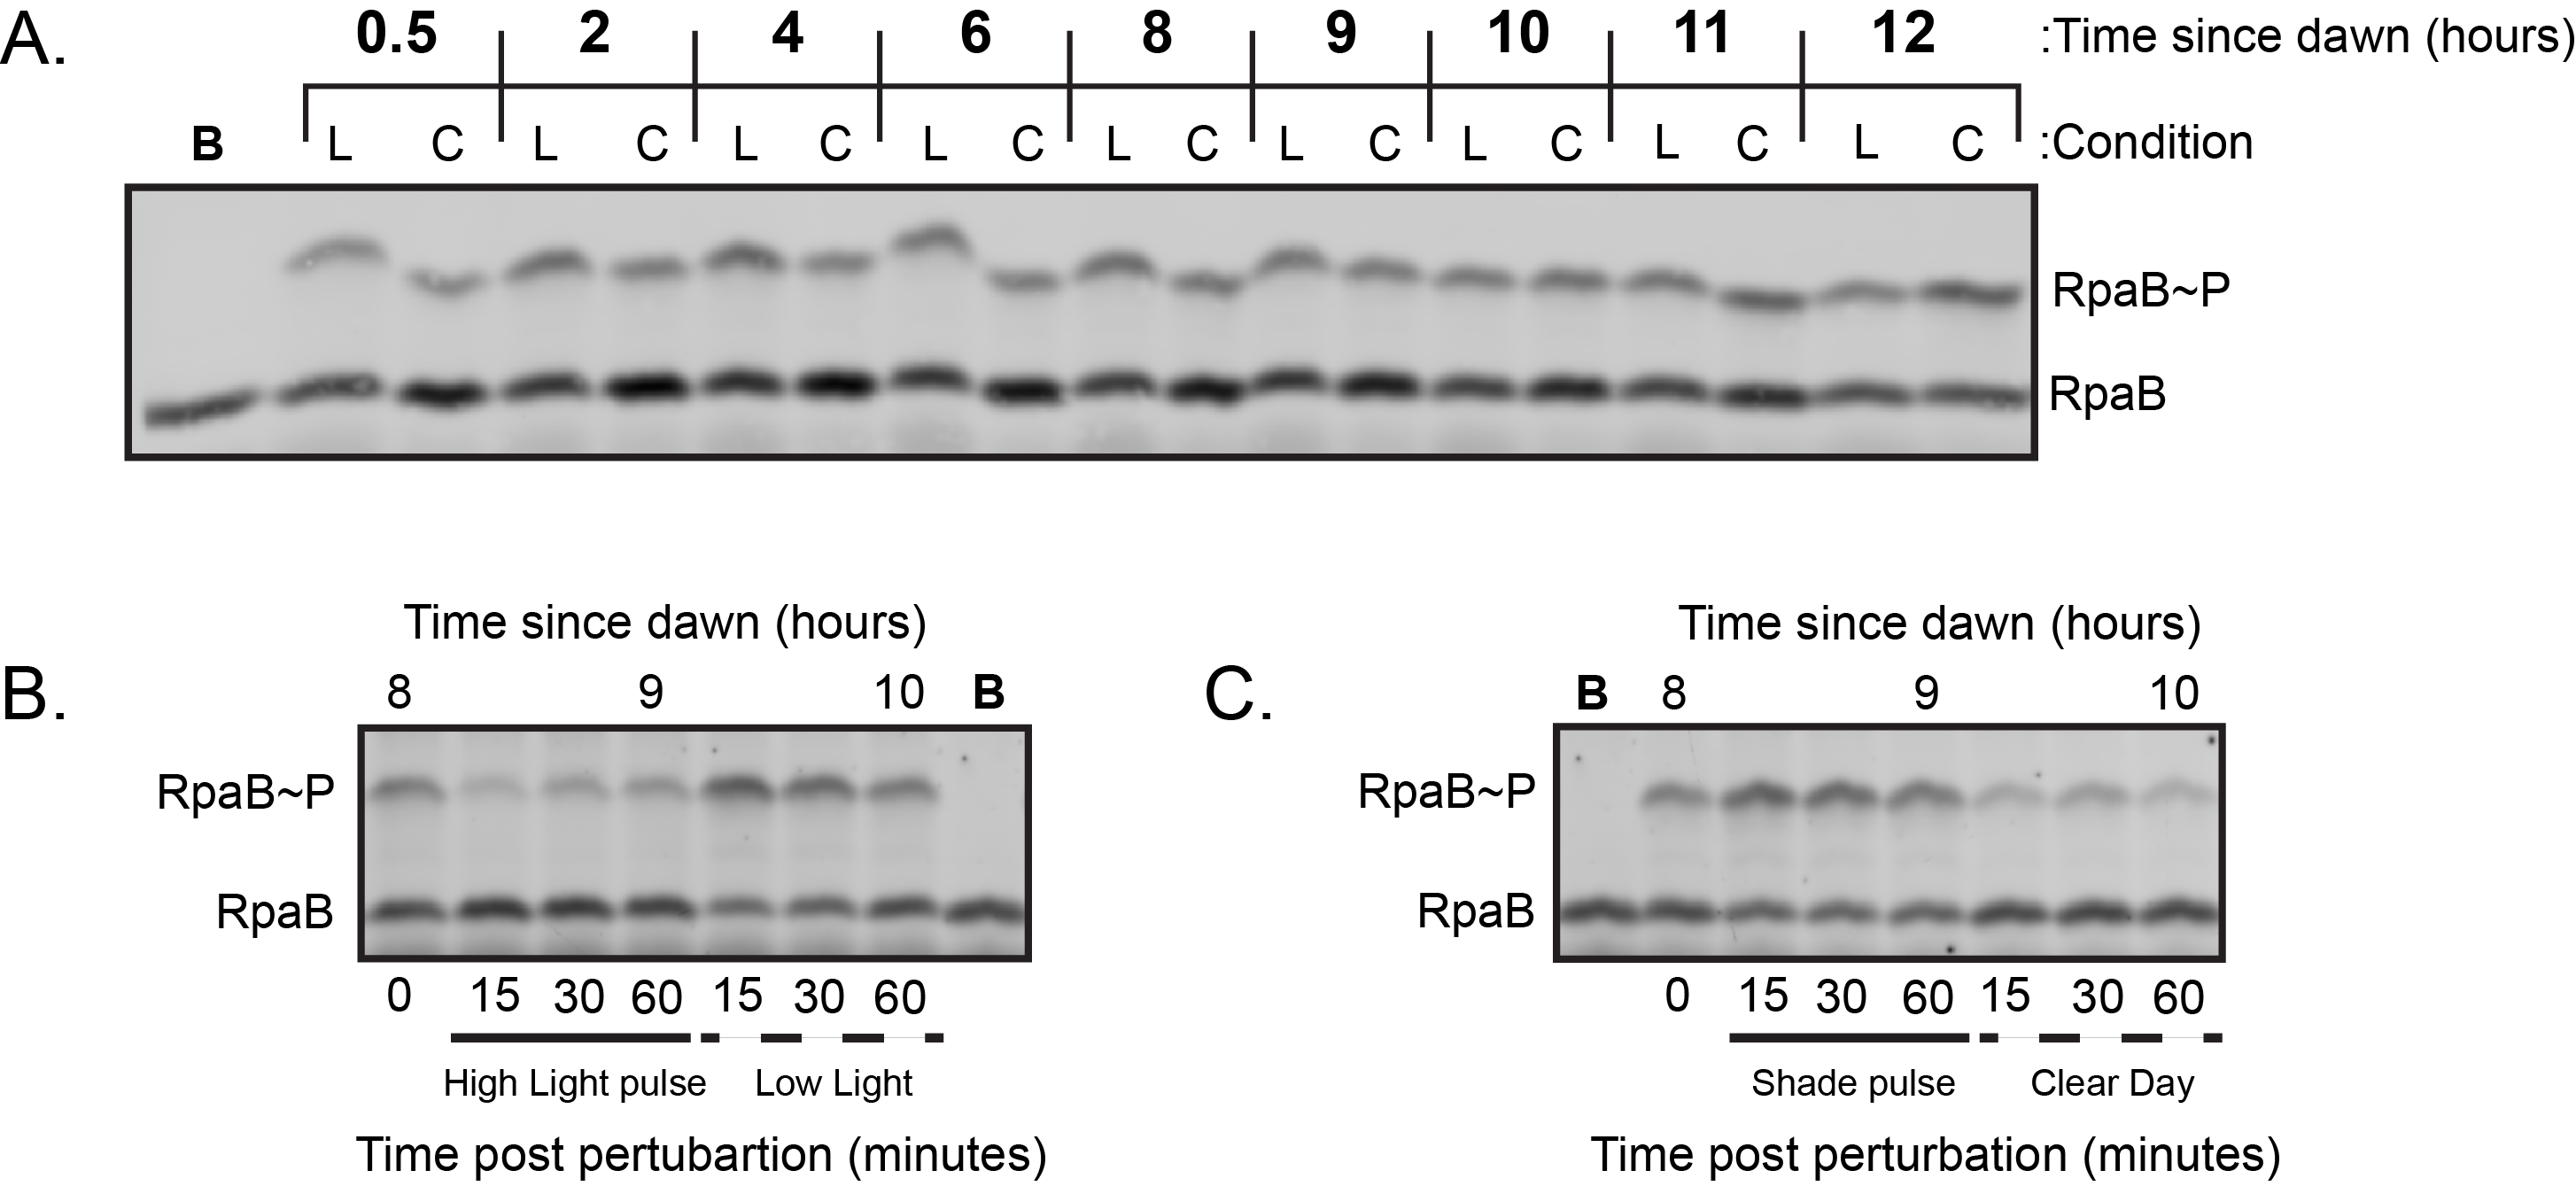

Supplement: supp [file elife-32032-supp-v2.zip › elife_poa_e32032_Figure_5_figure_supplement_1.png]

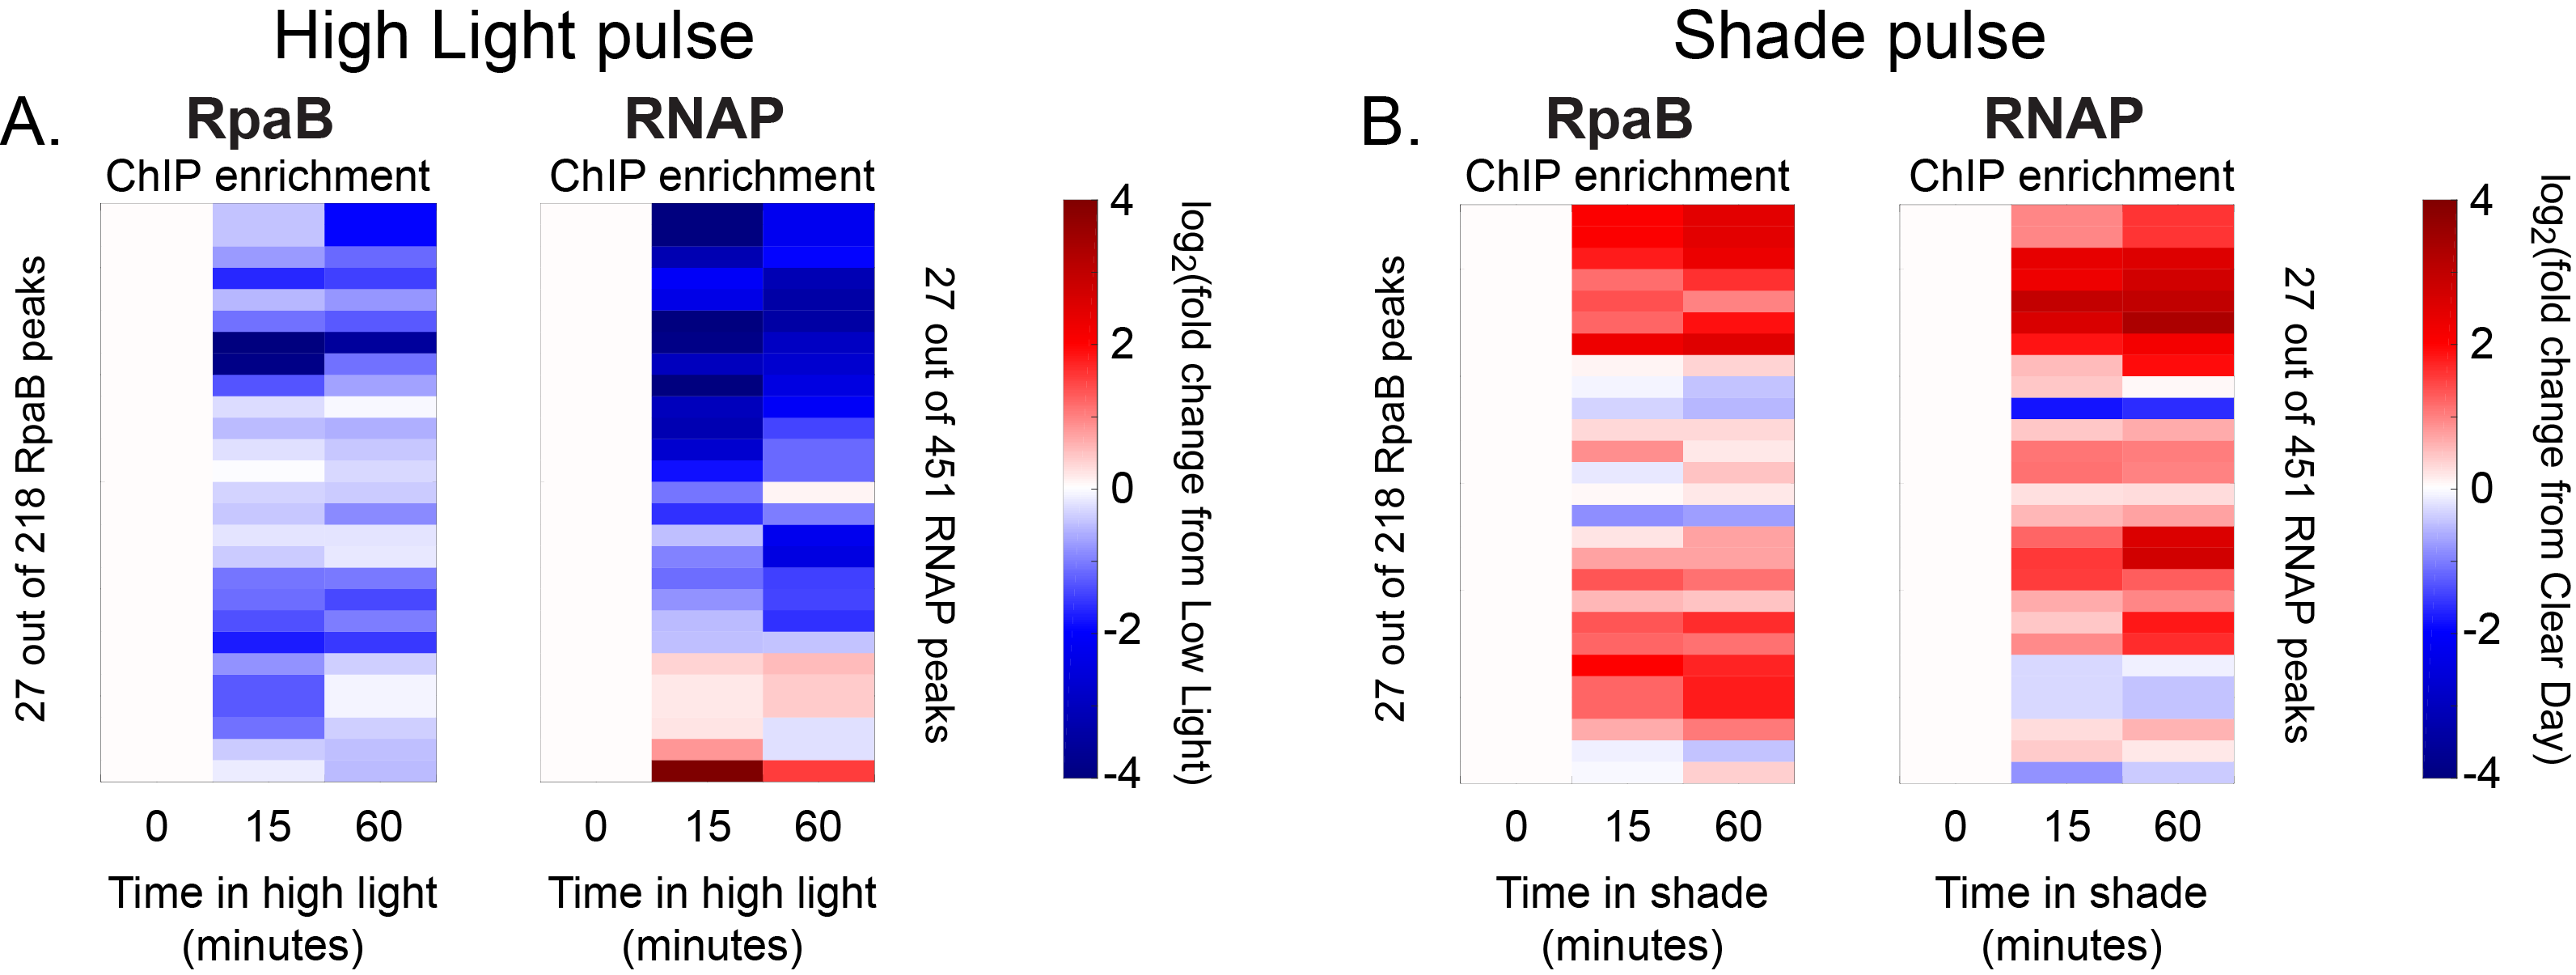

Supplement: supp [file elife-32032-supp-v2.zip › elife_poa_e32032_Figure_5_figure_supplement_3.png]

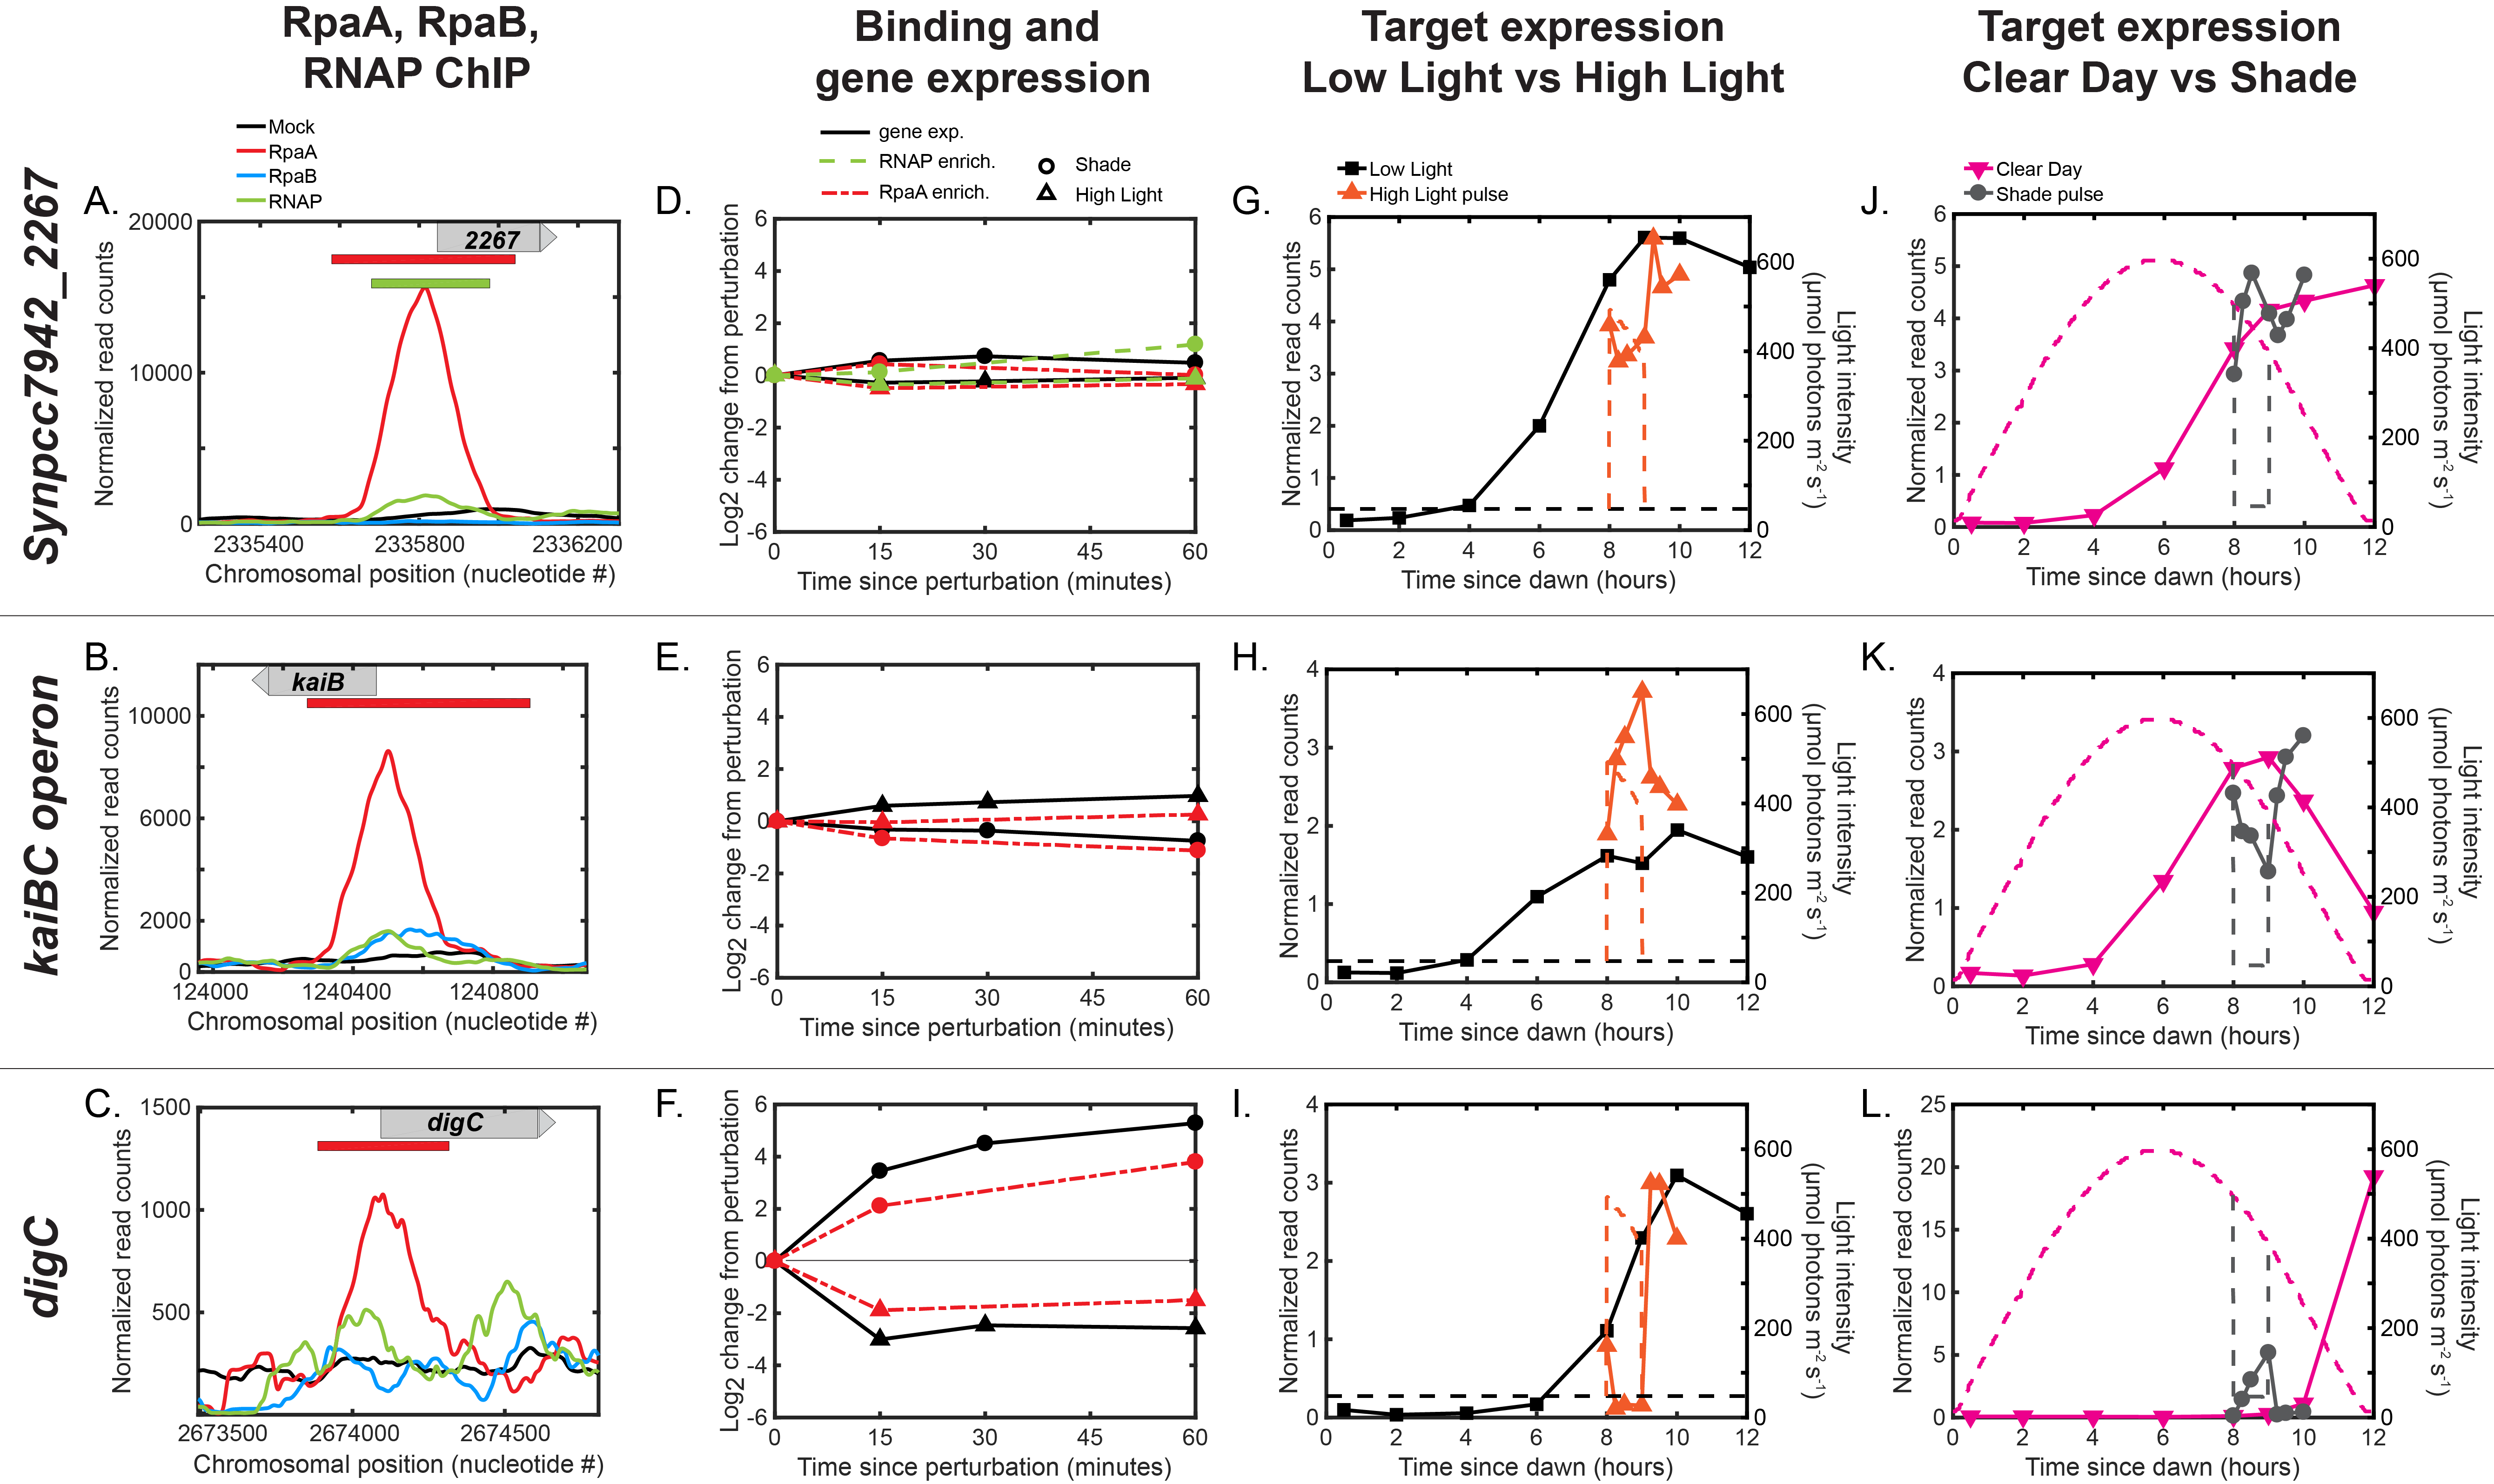

Supplement: supp [file elife-32032-supp-v2.zip › elife_poa_e32032_Figure_4_figure_supplement_4.png]

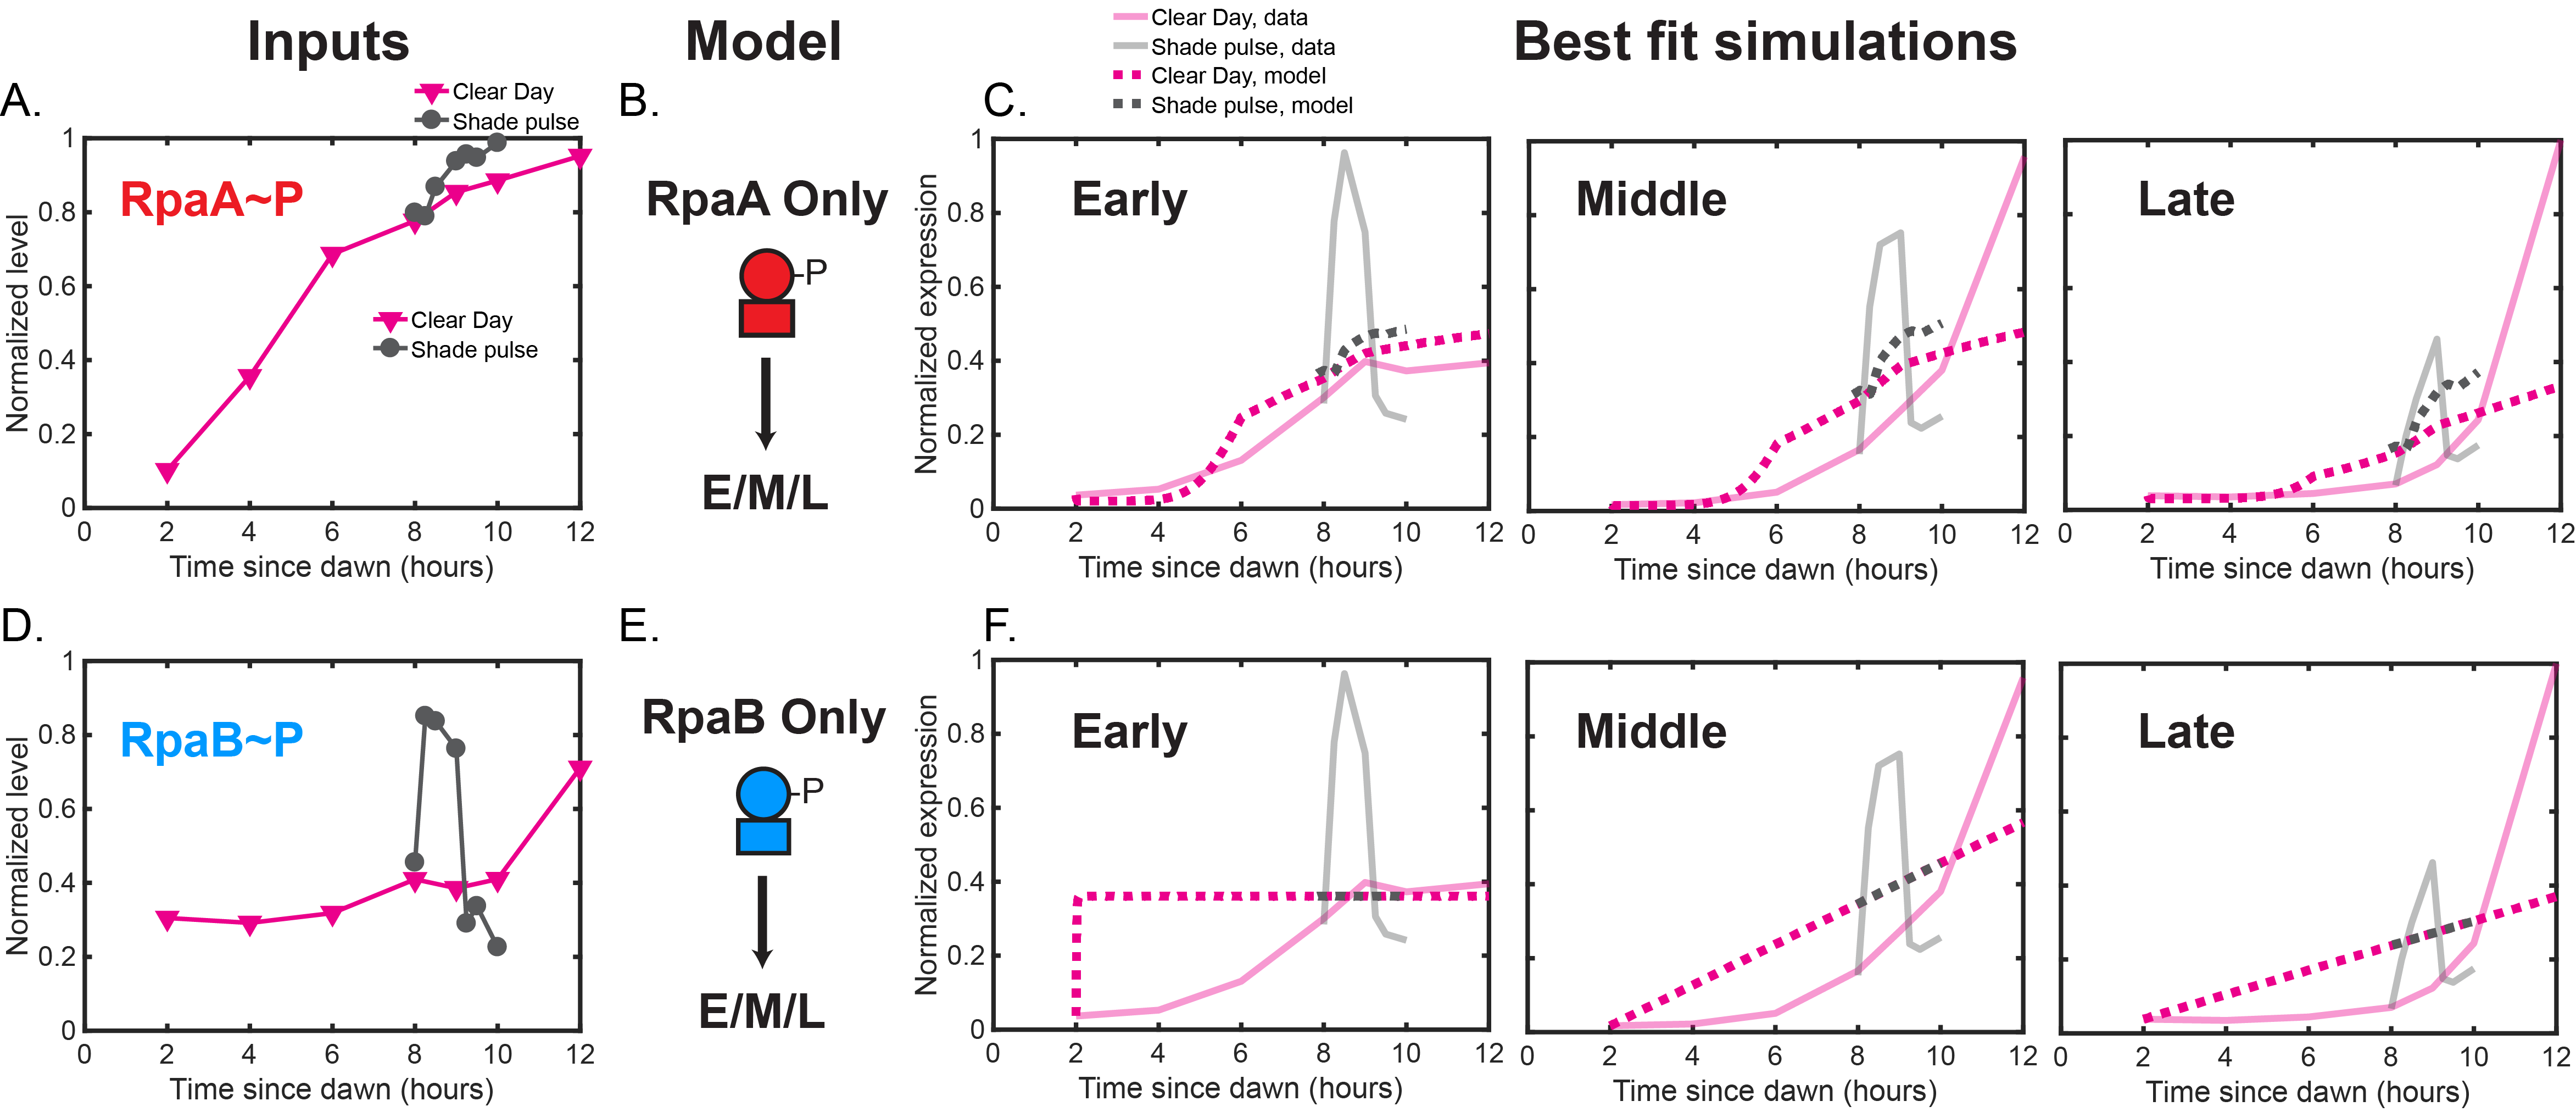

Supplement: supp [file elife-32032-supp-v2.zip › elife_poa_e32032_Figure_8_figure_supplement_1.png]

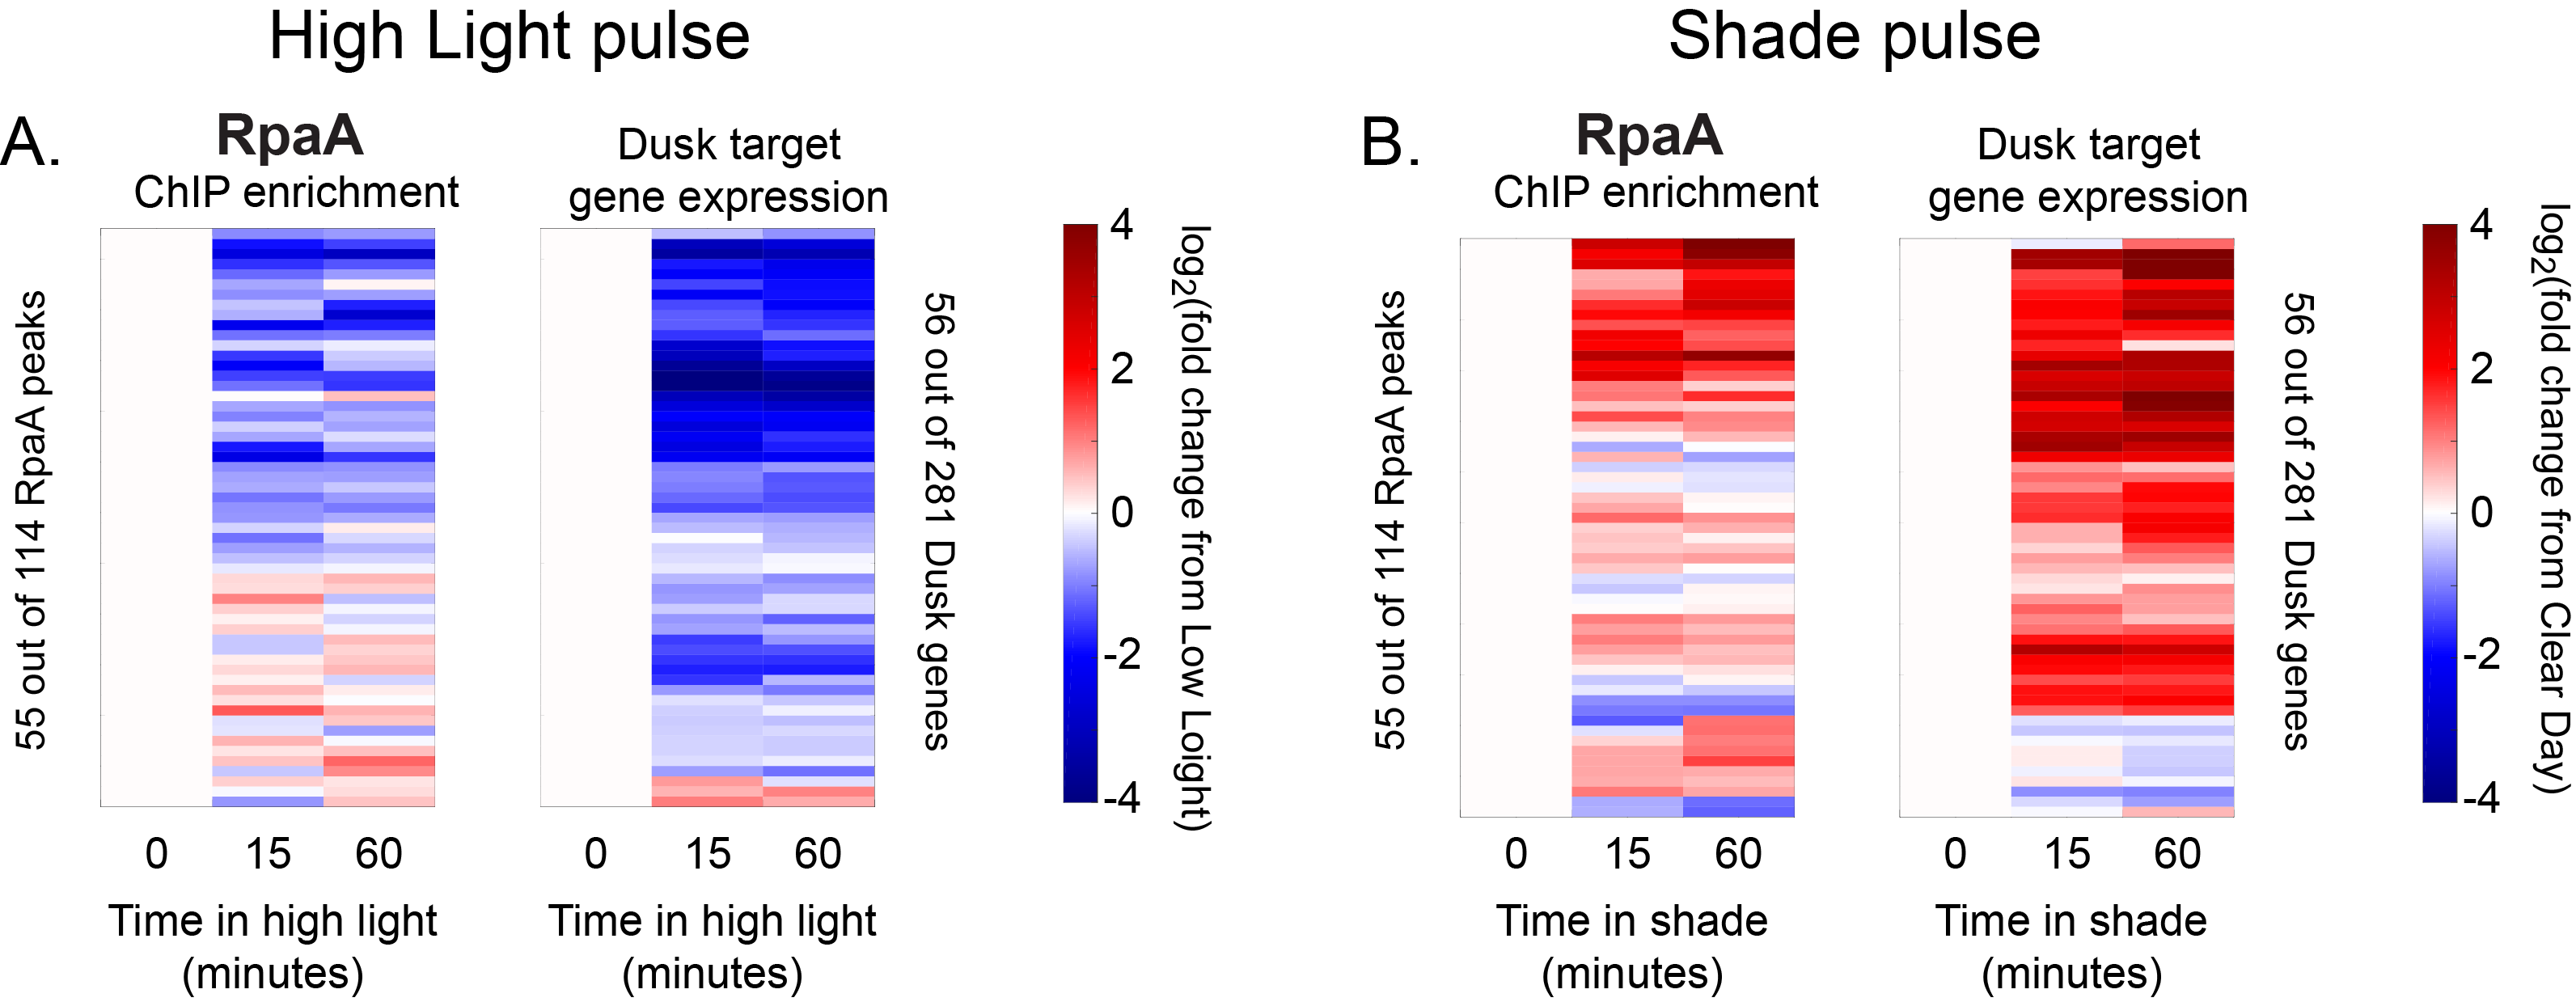

Supplement: supp [file elife-32032-supp-v2.zip › elife_poa_e32032_Figure_4_figure_supplement_2.png]

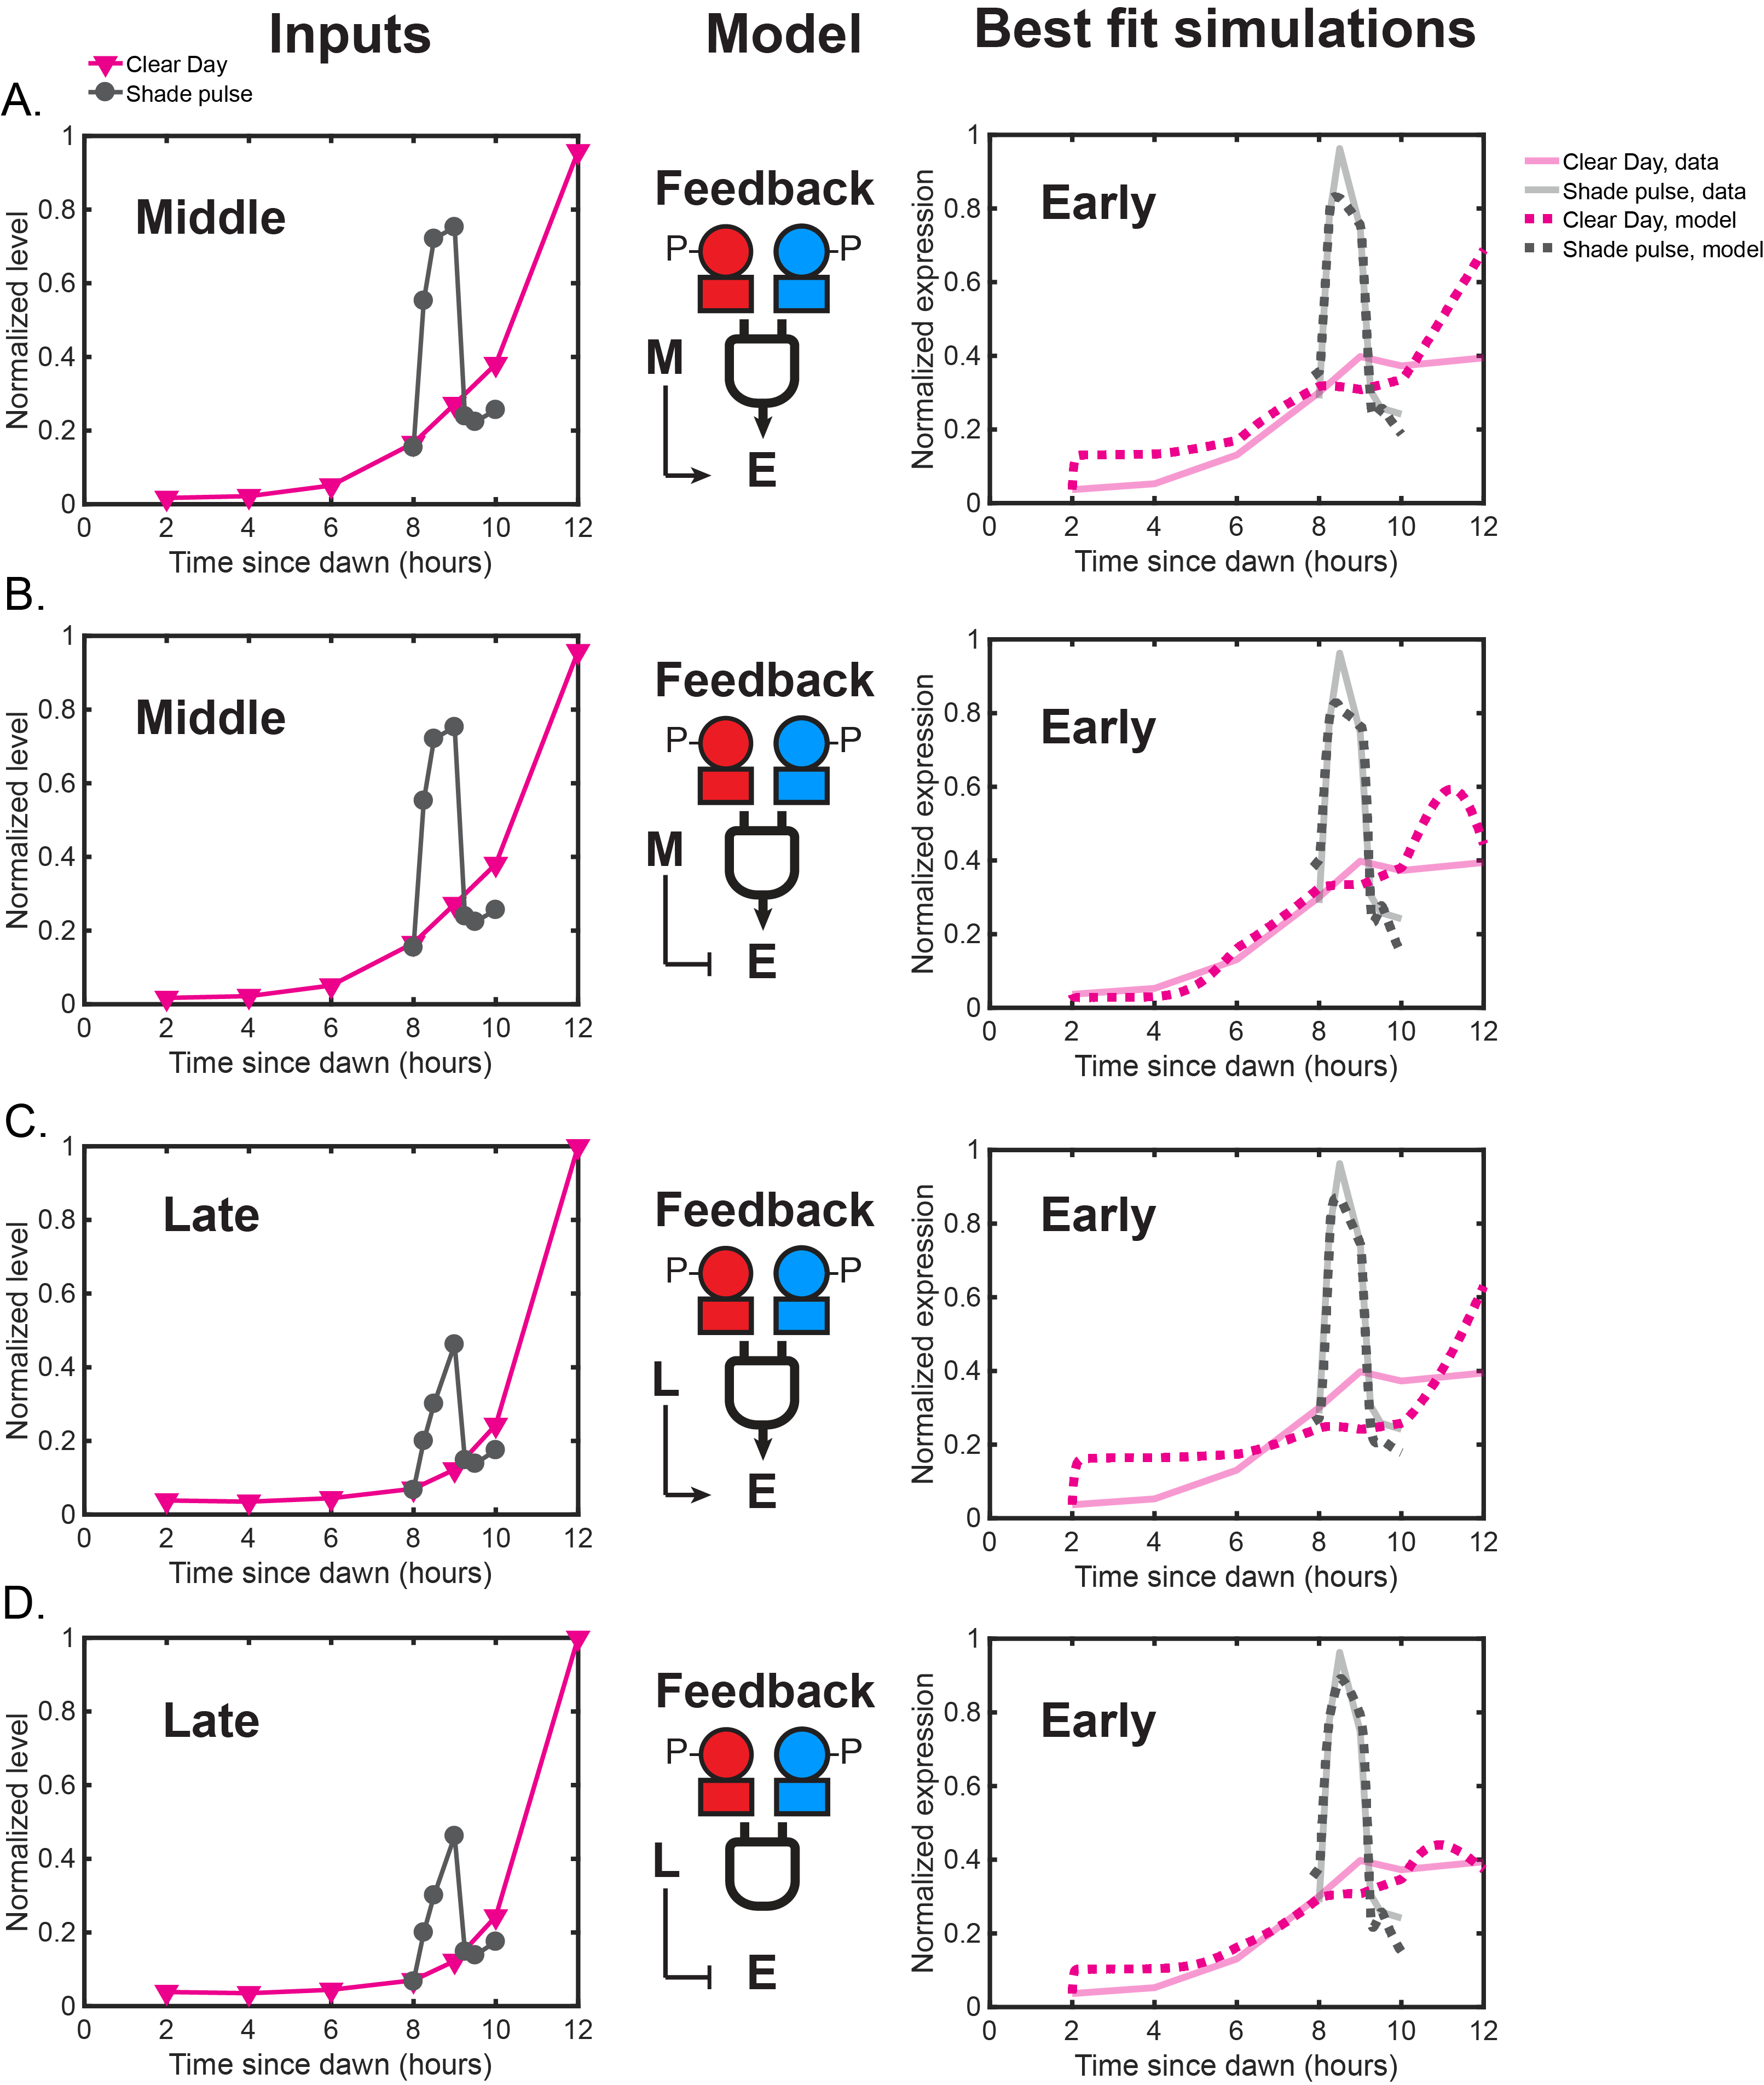

Supplement: supp [file elife-32032-supp-v2.zip › elife_poa_e32032_Figure_8_figure_supplement_2.png]

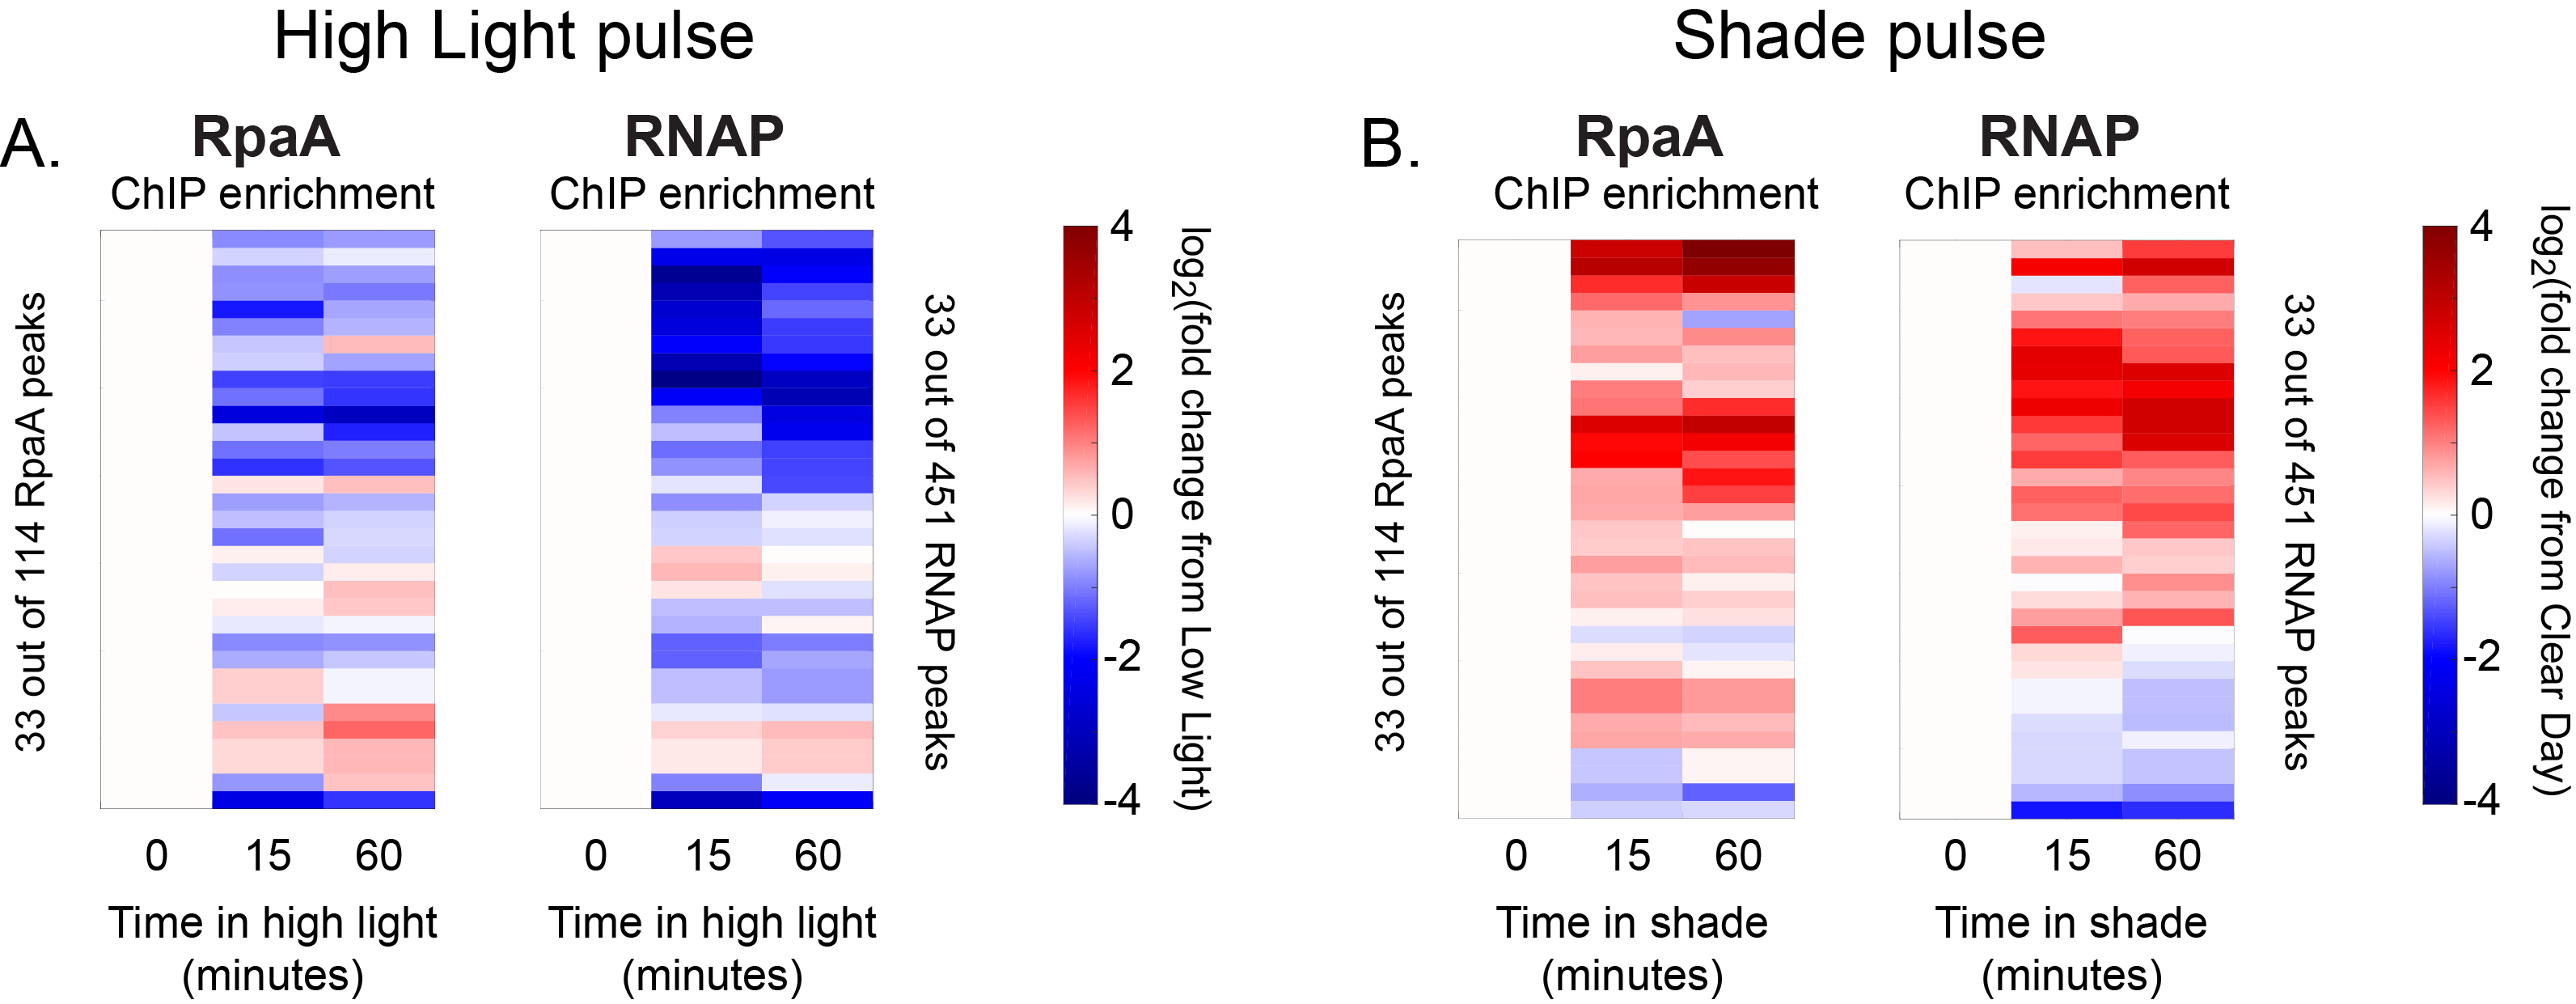

Supplement: supp [file elife-32032-supp-v2.zip › elife_poa_e32032_Figure_4_figure_supplement_3.png]

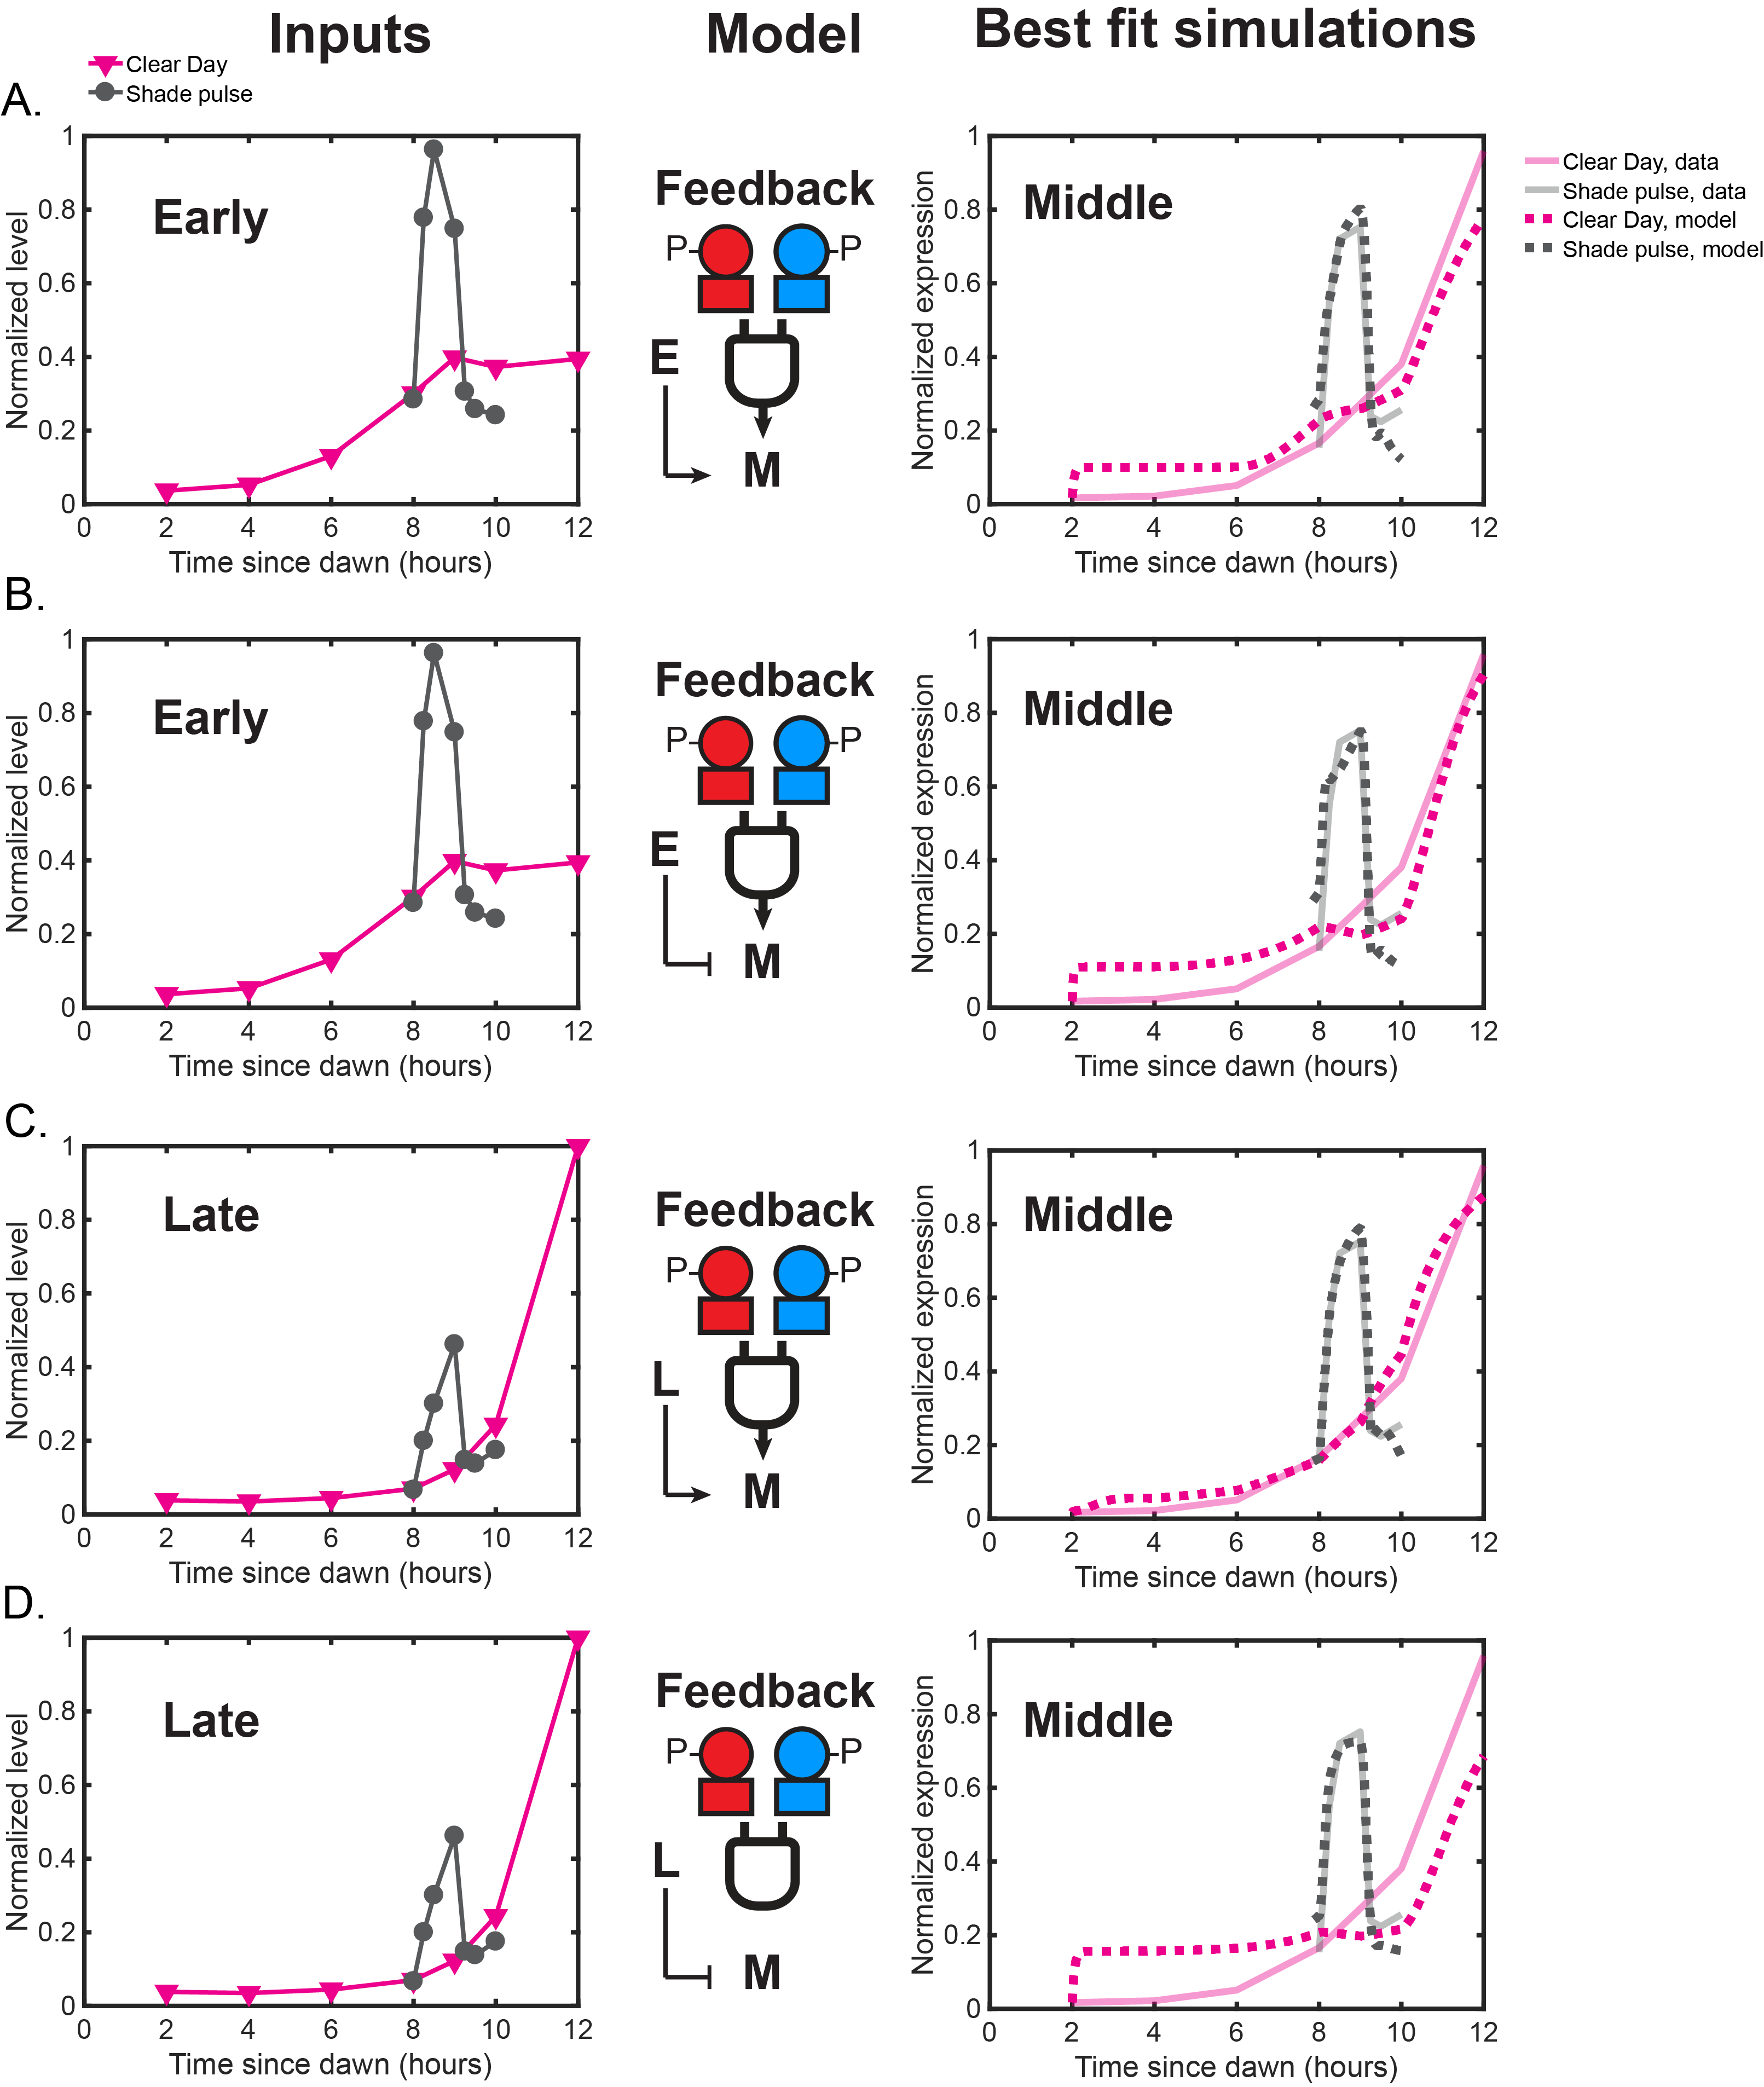

Supplement: supp [file elife-32032-supp-v2.zip › elife_poa_e32032_Figure_8_figure_supplement_3.png]

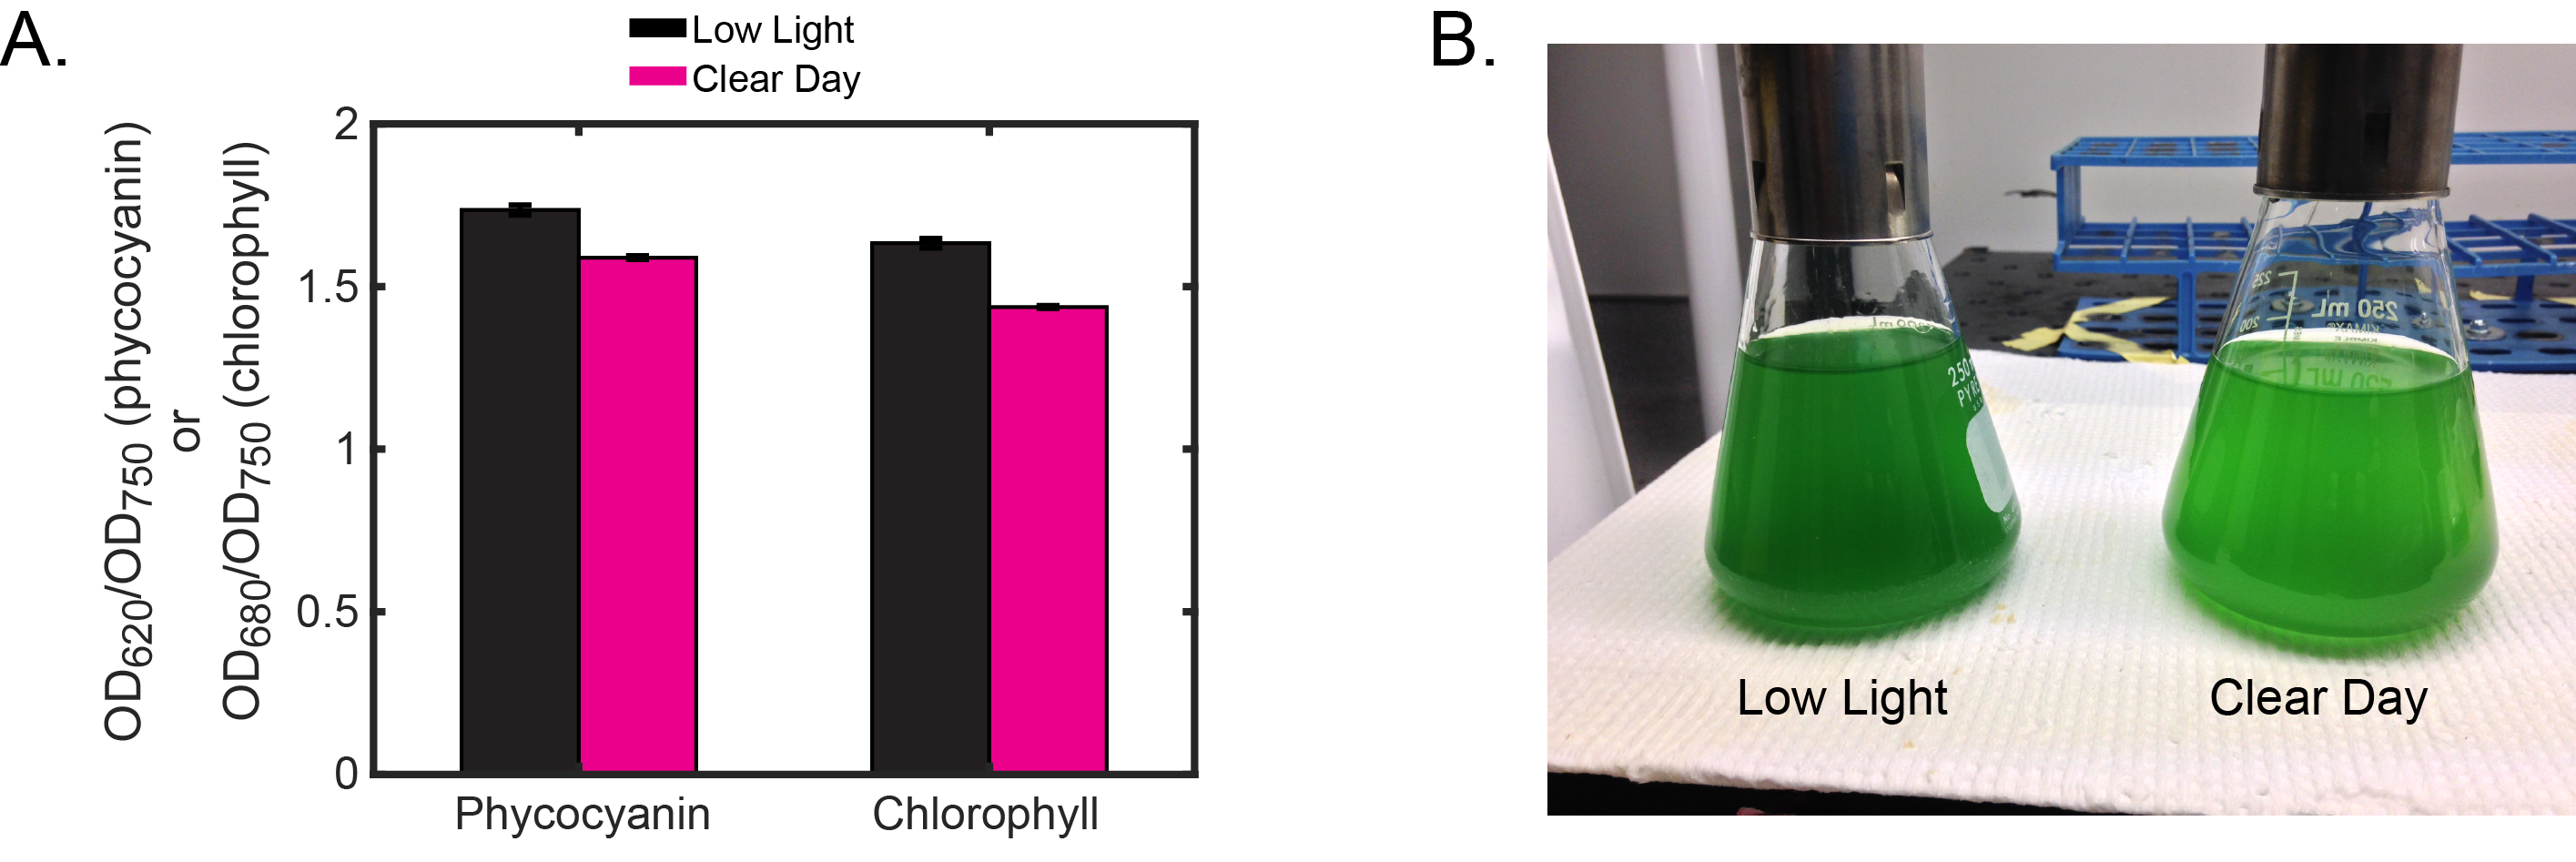

Supplement: supp [file elife-32032-supp-v2.zip › elife_poa_e32032_Figure_2_figure_supplement_1.png]

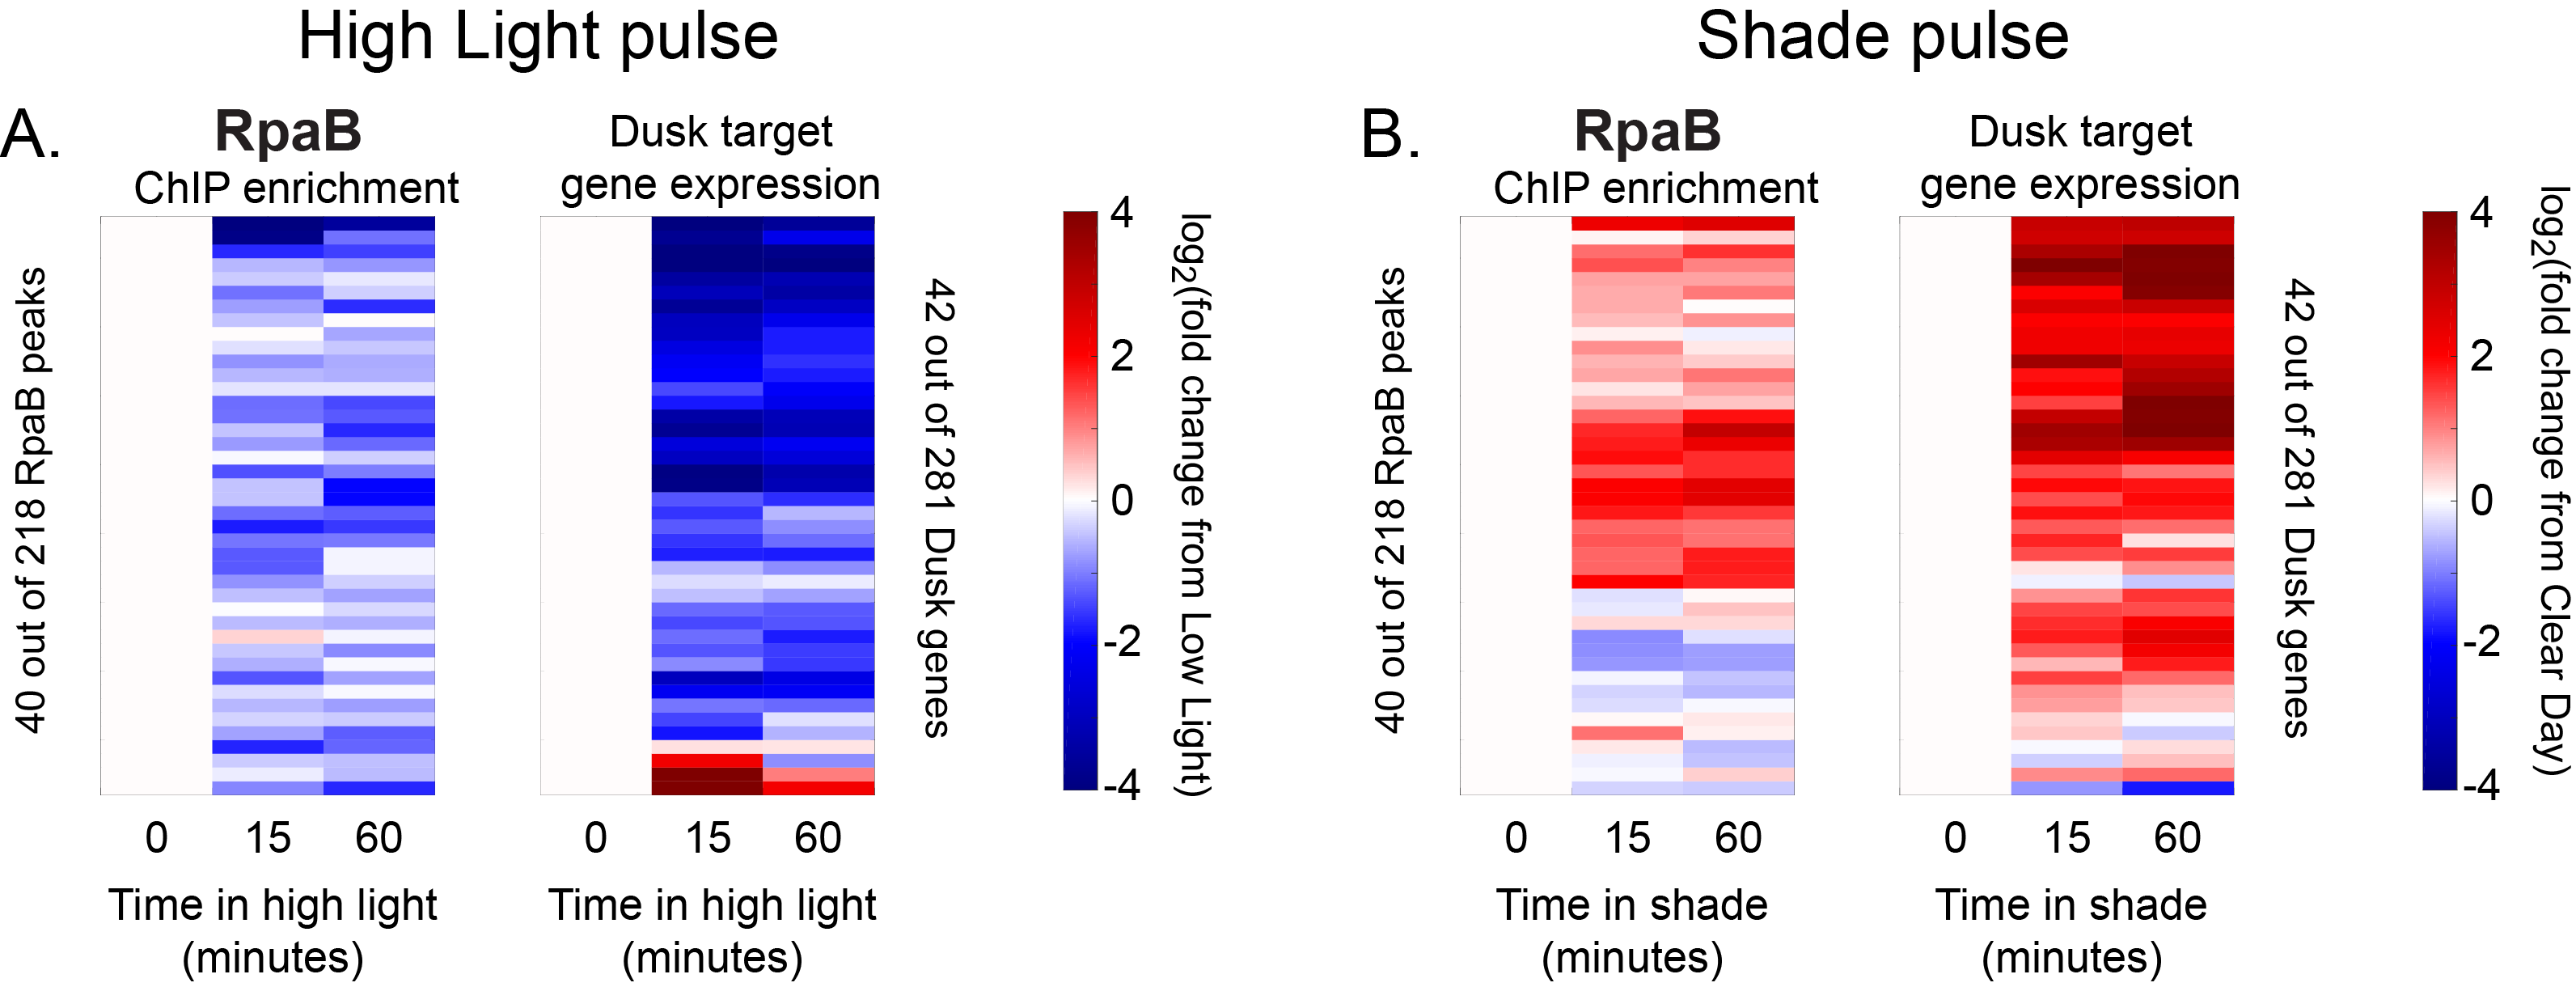

Supplement: supp [file elife-32032-supp-v2.zip › elife_poa_e32032_Figure_5_figure_supplement_2.png]

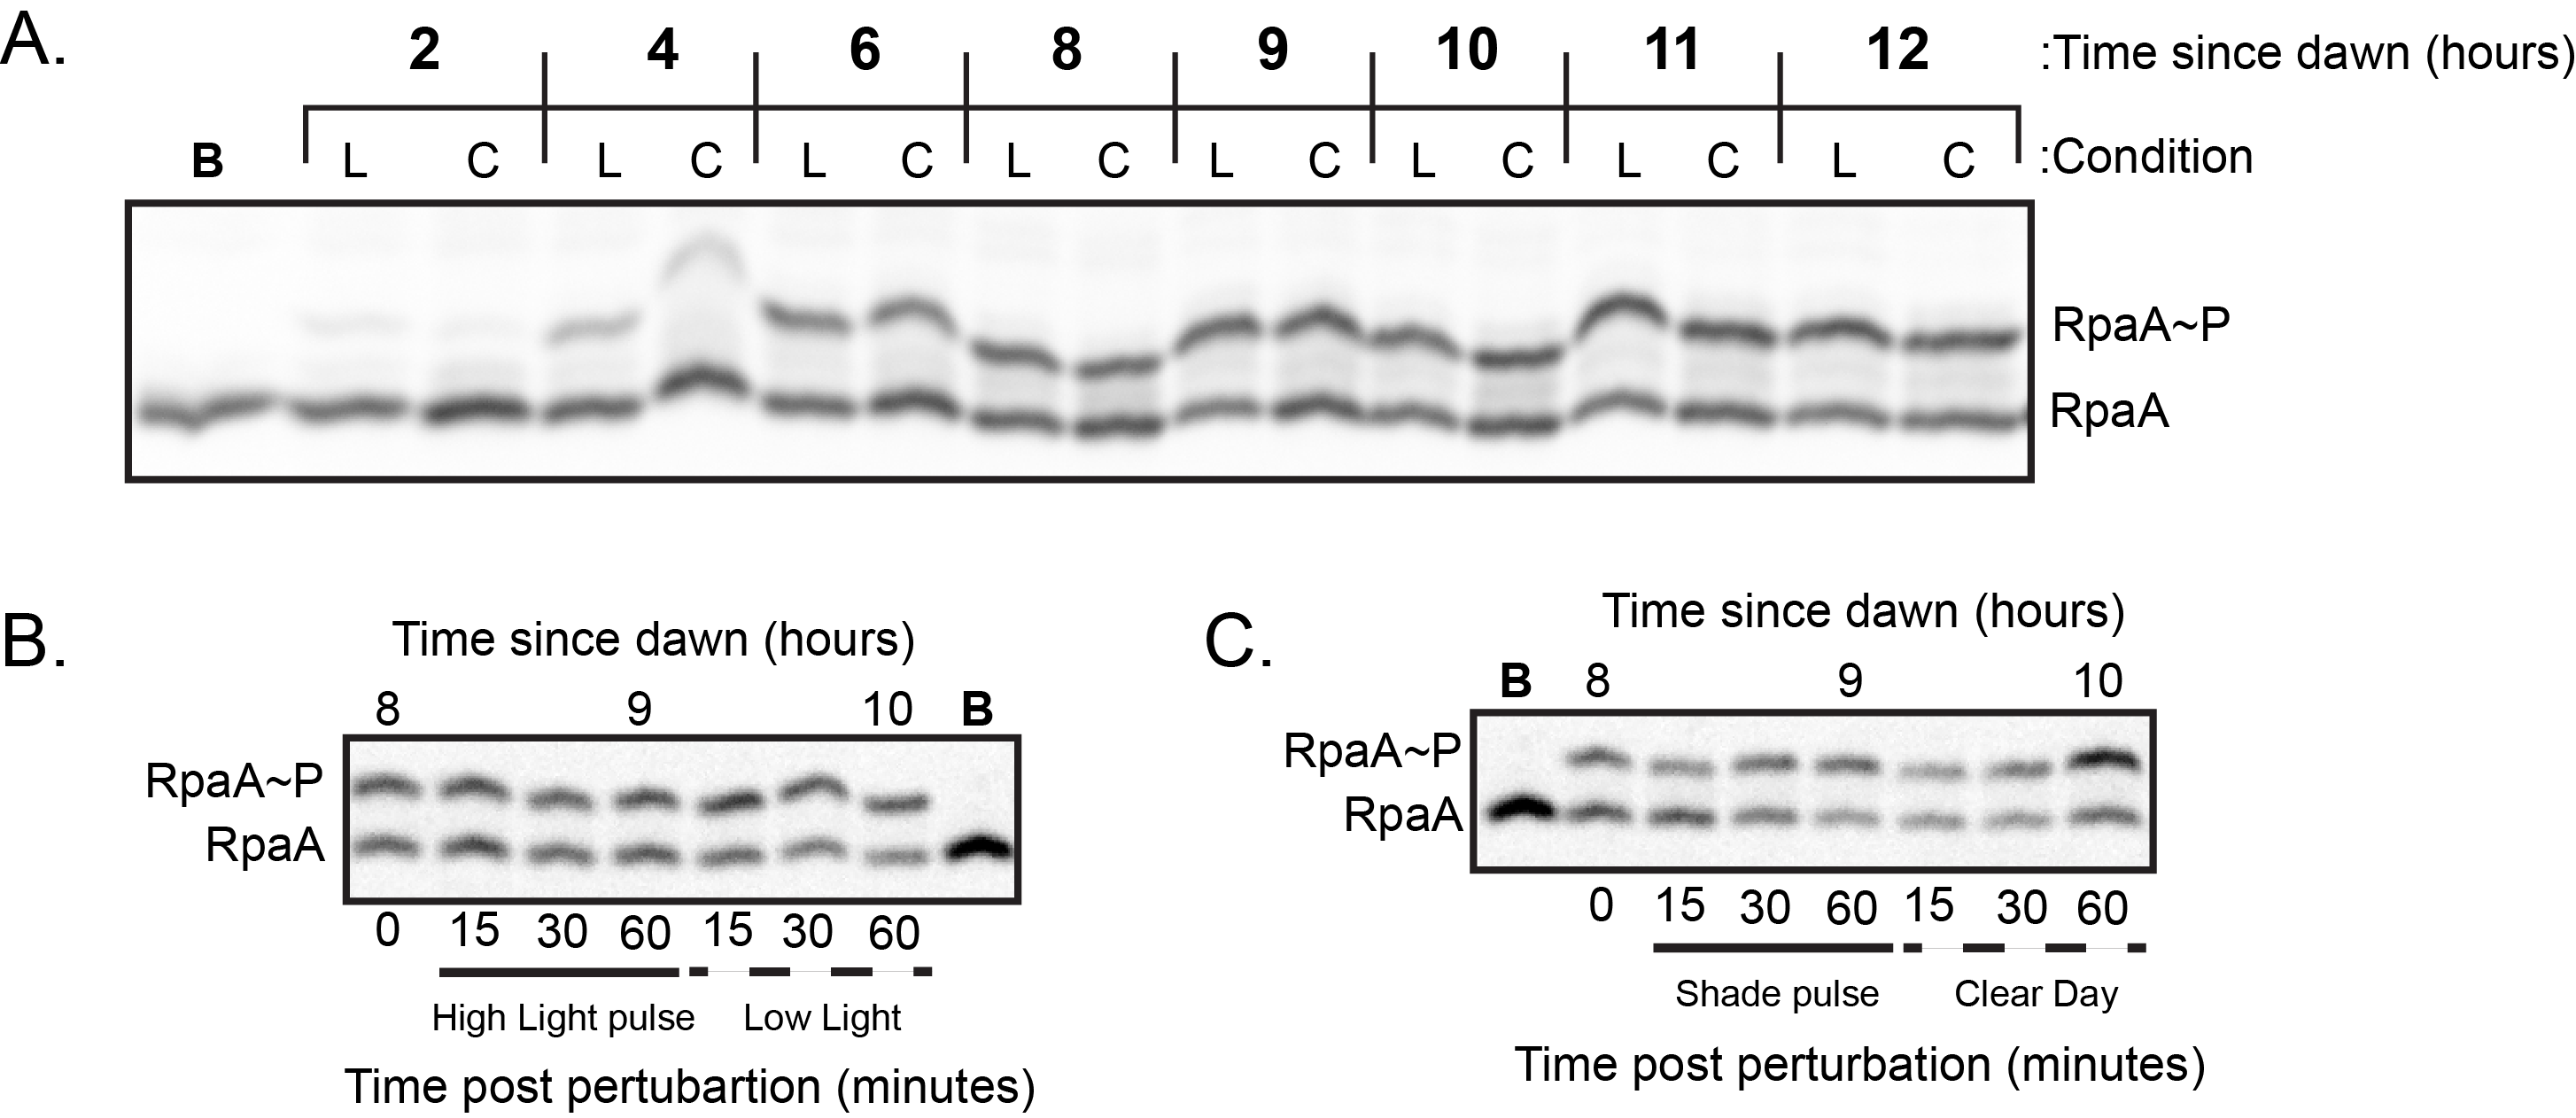

Supplement: supp [file elife-32032-supp-v2.zip › elife_poa_e32032_Figure_4_figure_supplement_1.png]

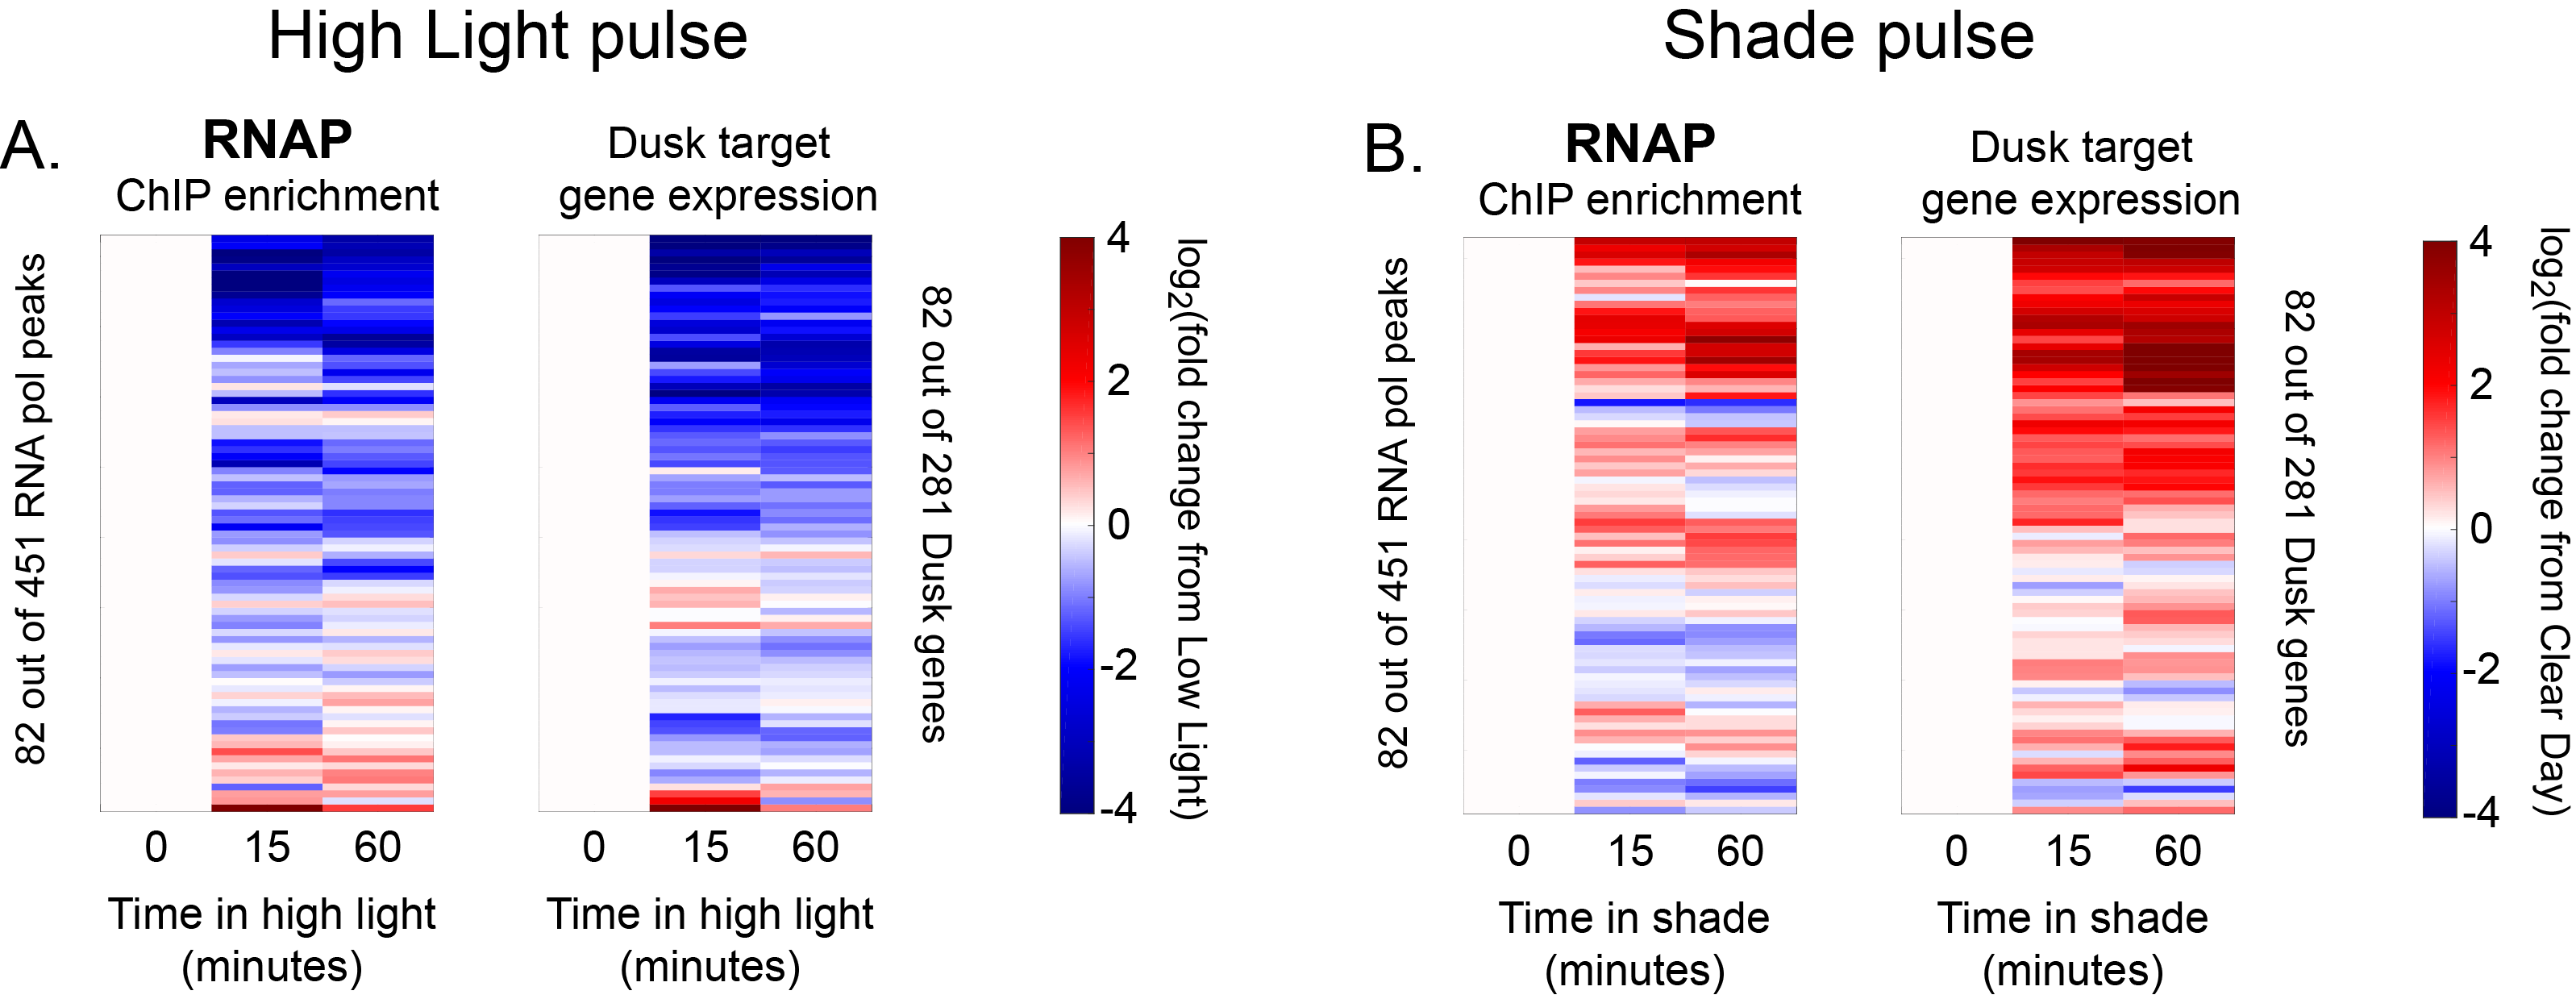

Supplement: supp [file elife-32032-supp-v2.zip › elife_poa_e32032_Figure_3_figure_supplement_2.png]

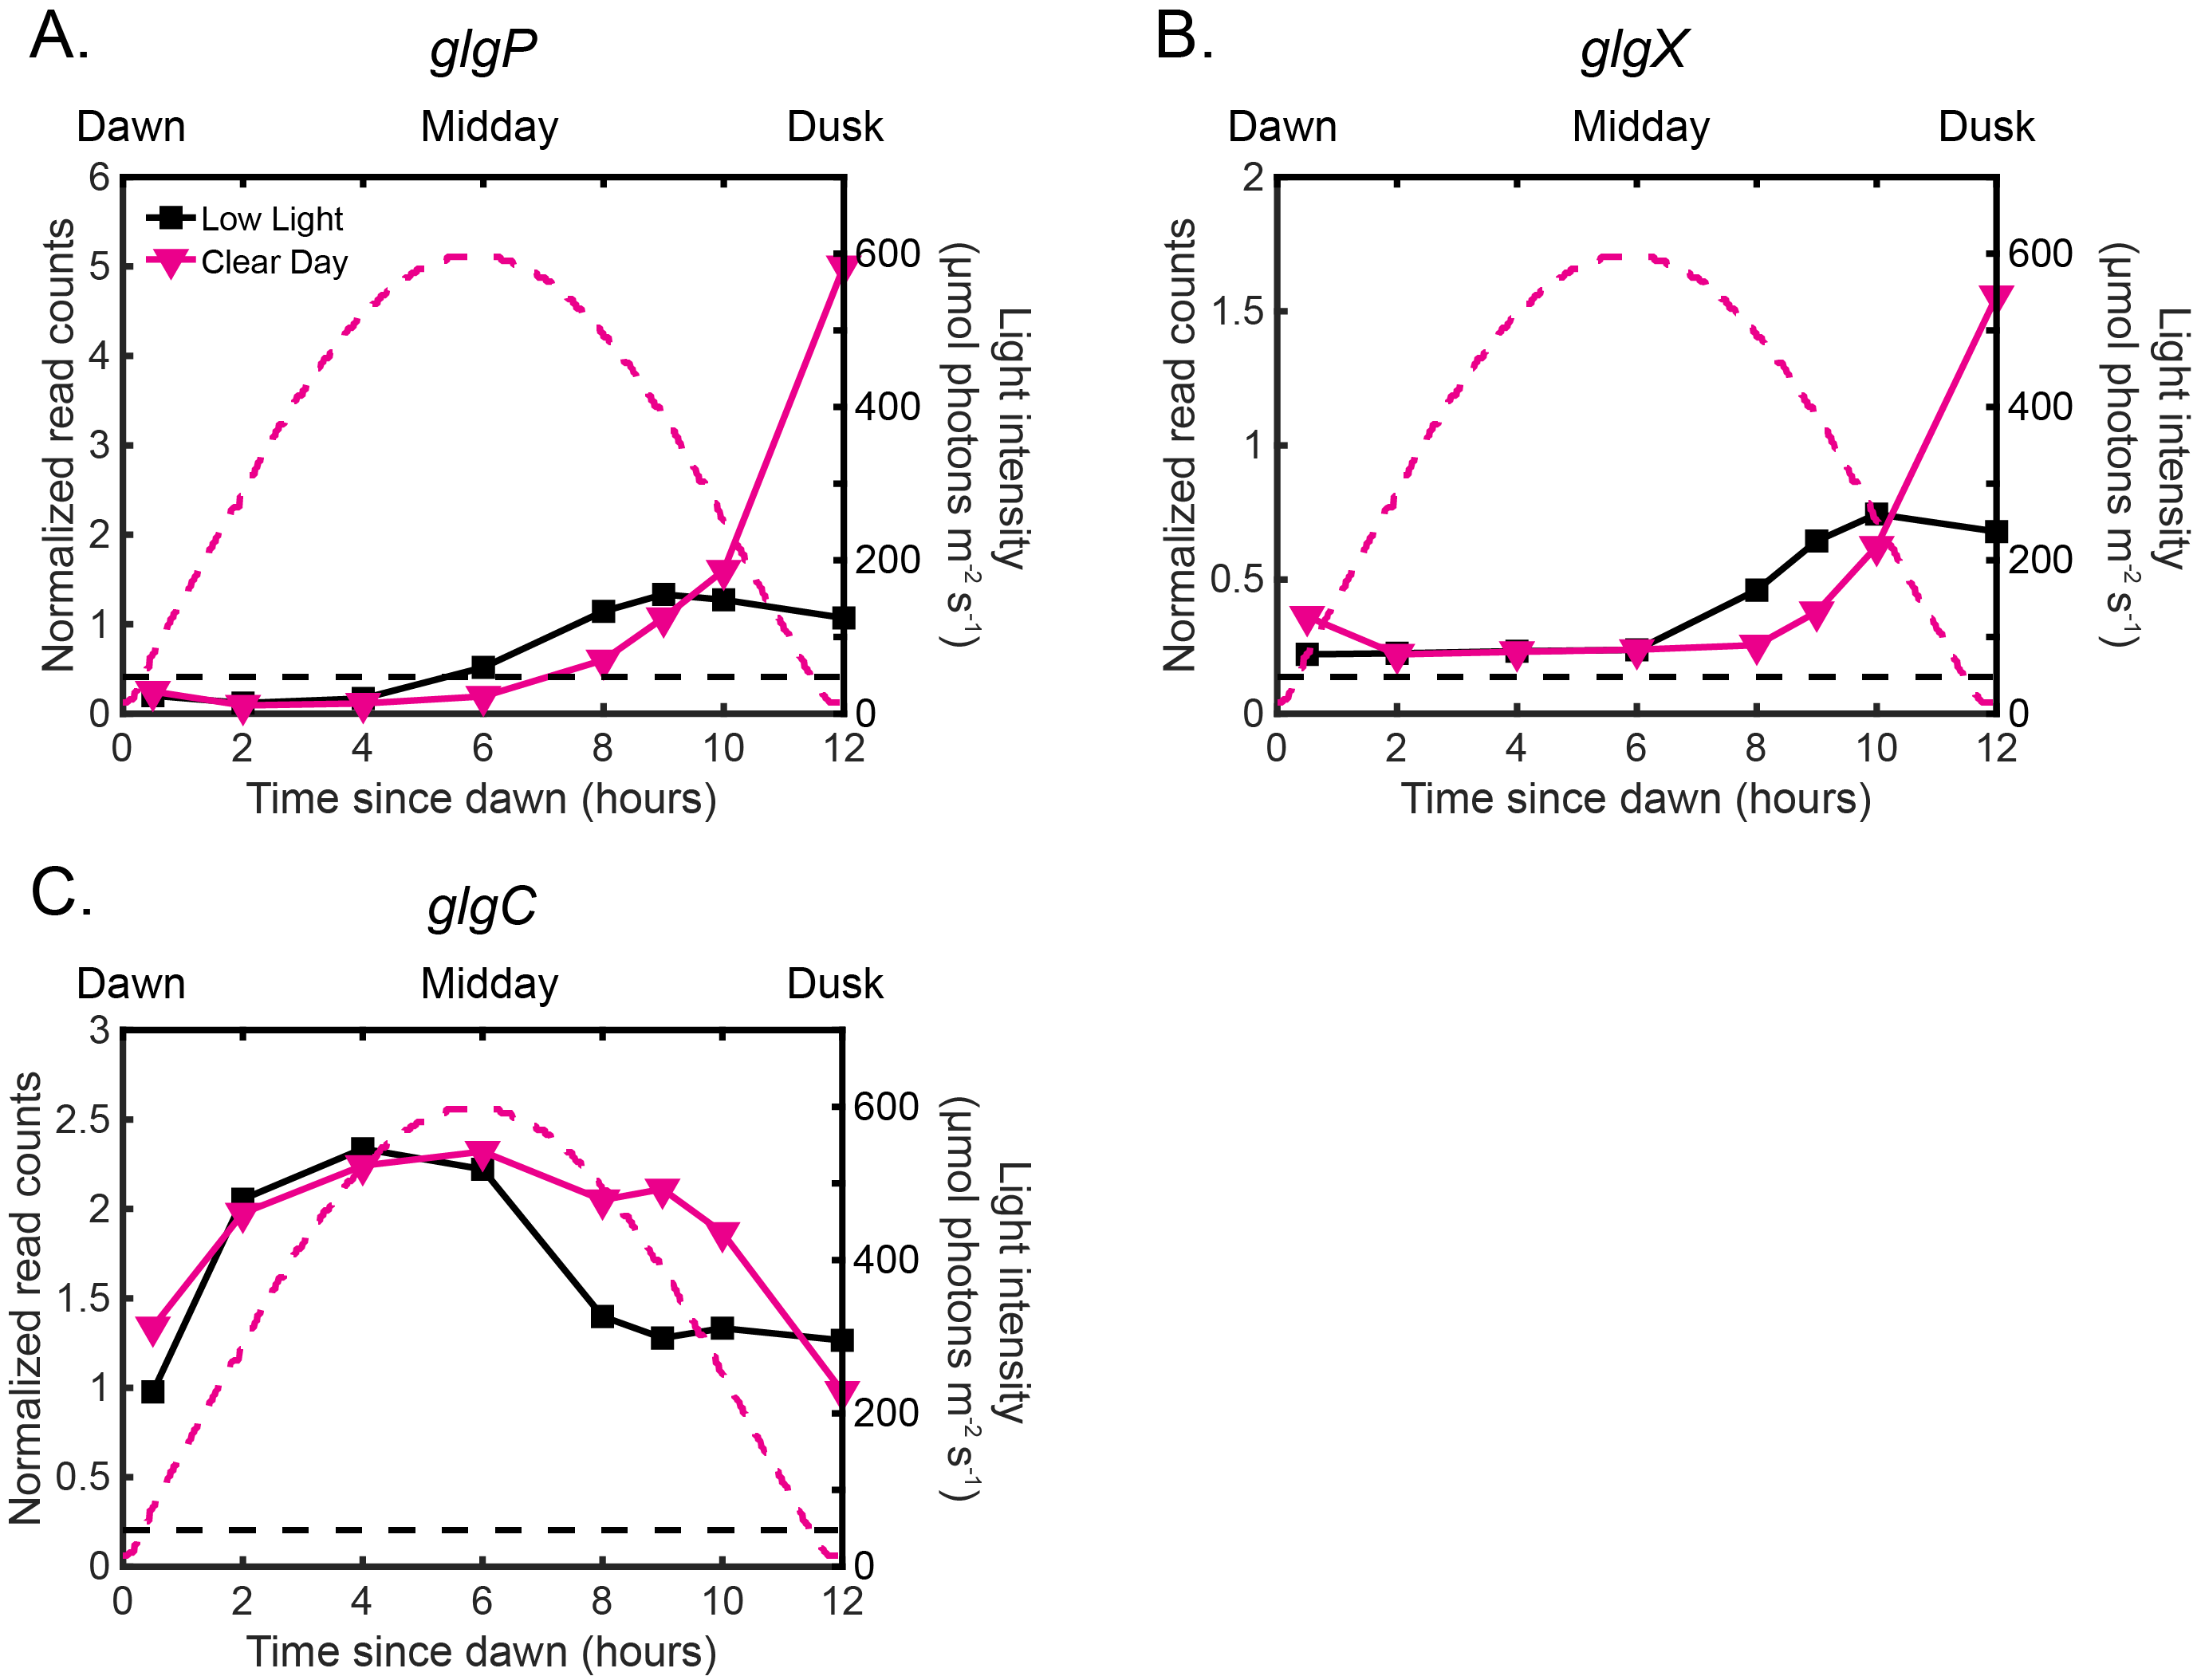

Supplement: supp [file elife-32032-supp-v2.zip › elife_poa_e32032_Figure_2_figure_supplement_4.png]

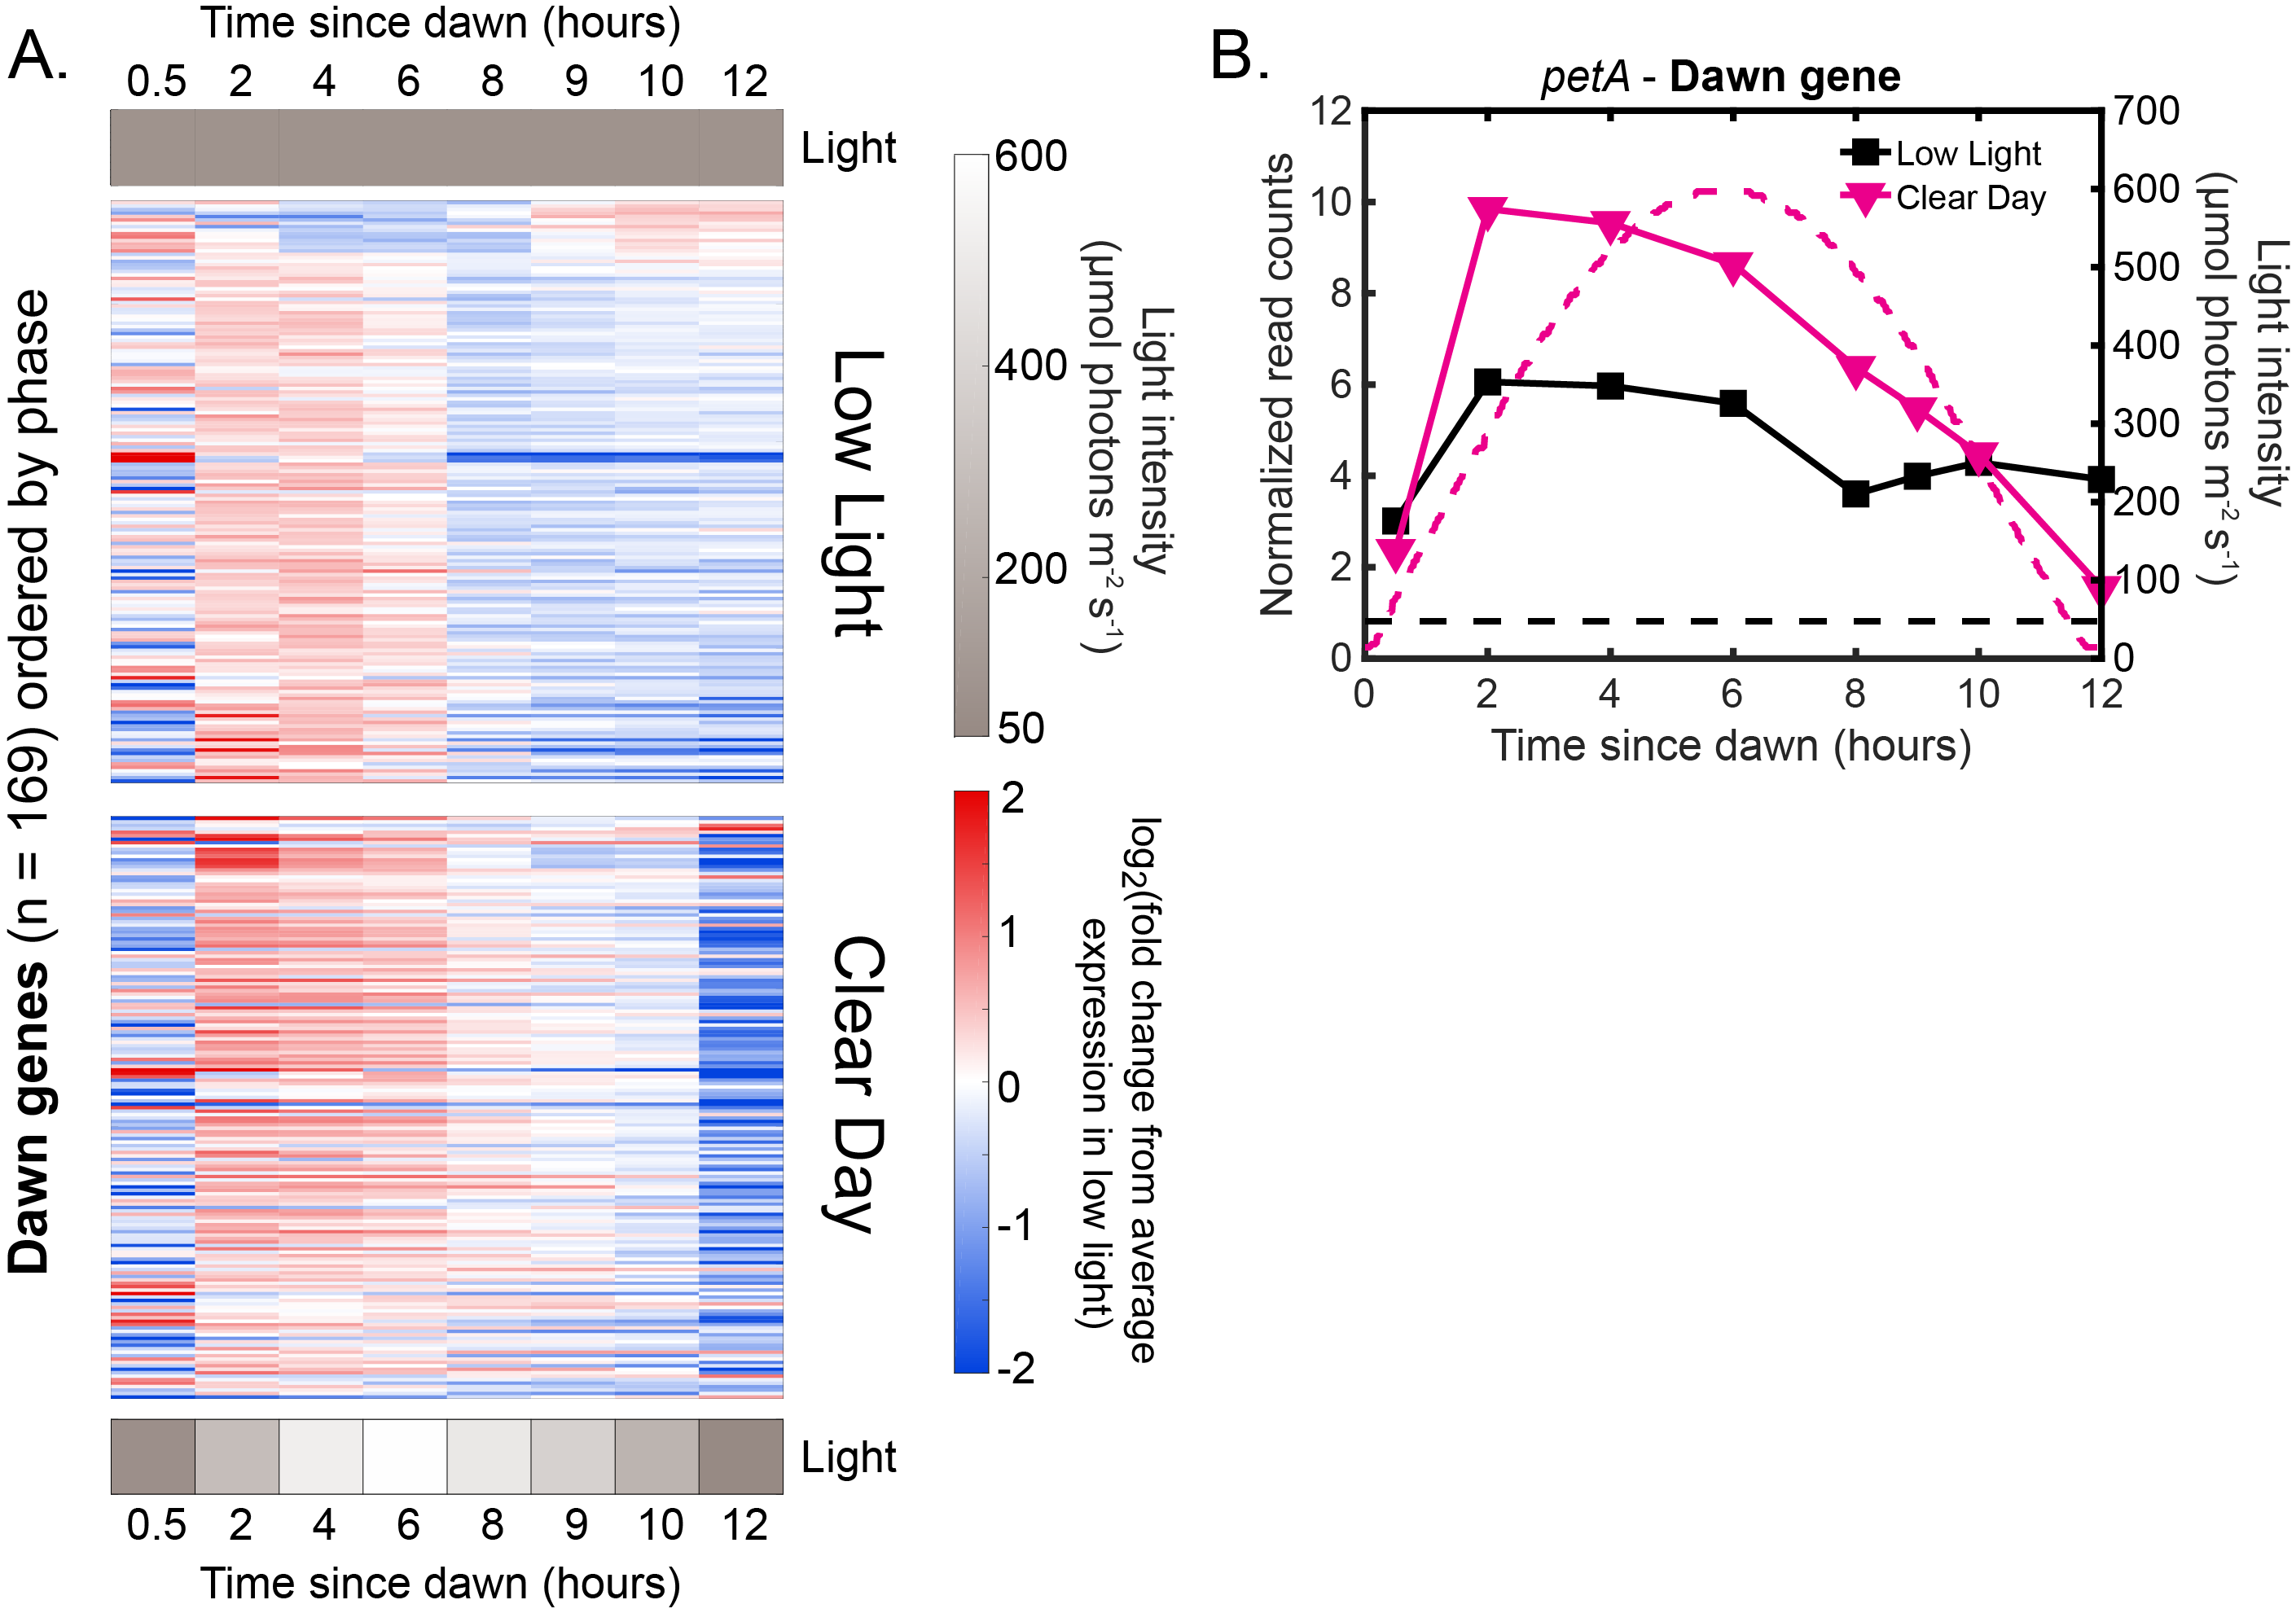

Supplement: supp [file elife-32032-supp-v2.zip › elife_poa_e32032_Figure_2_figure_supplement_3.png]

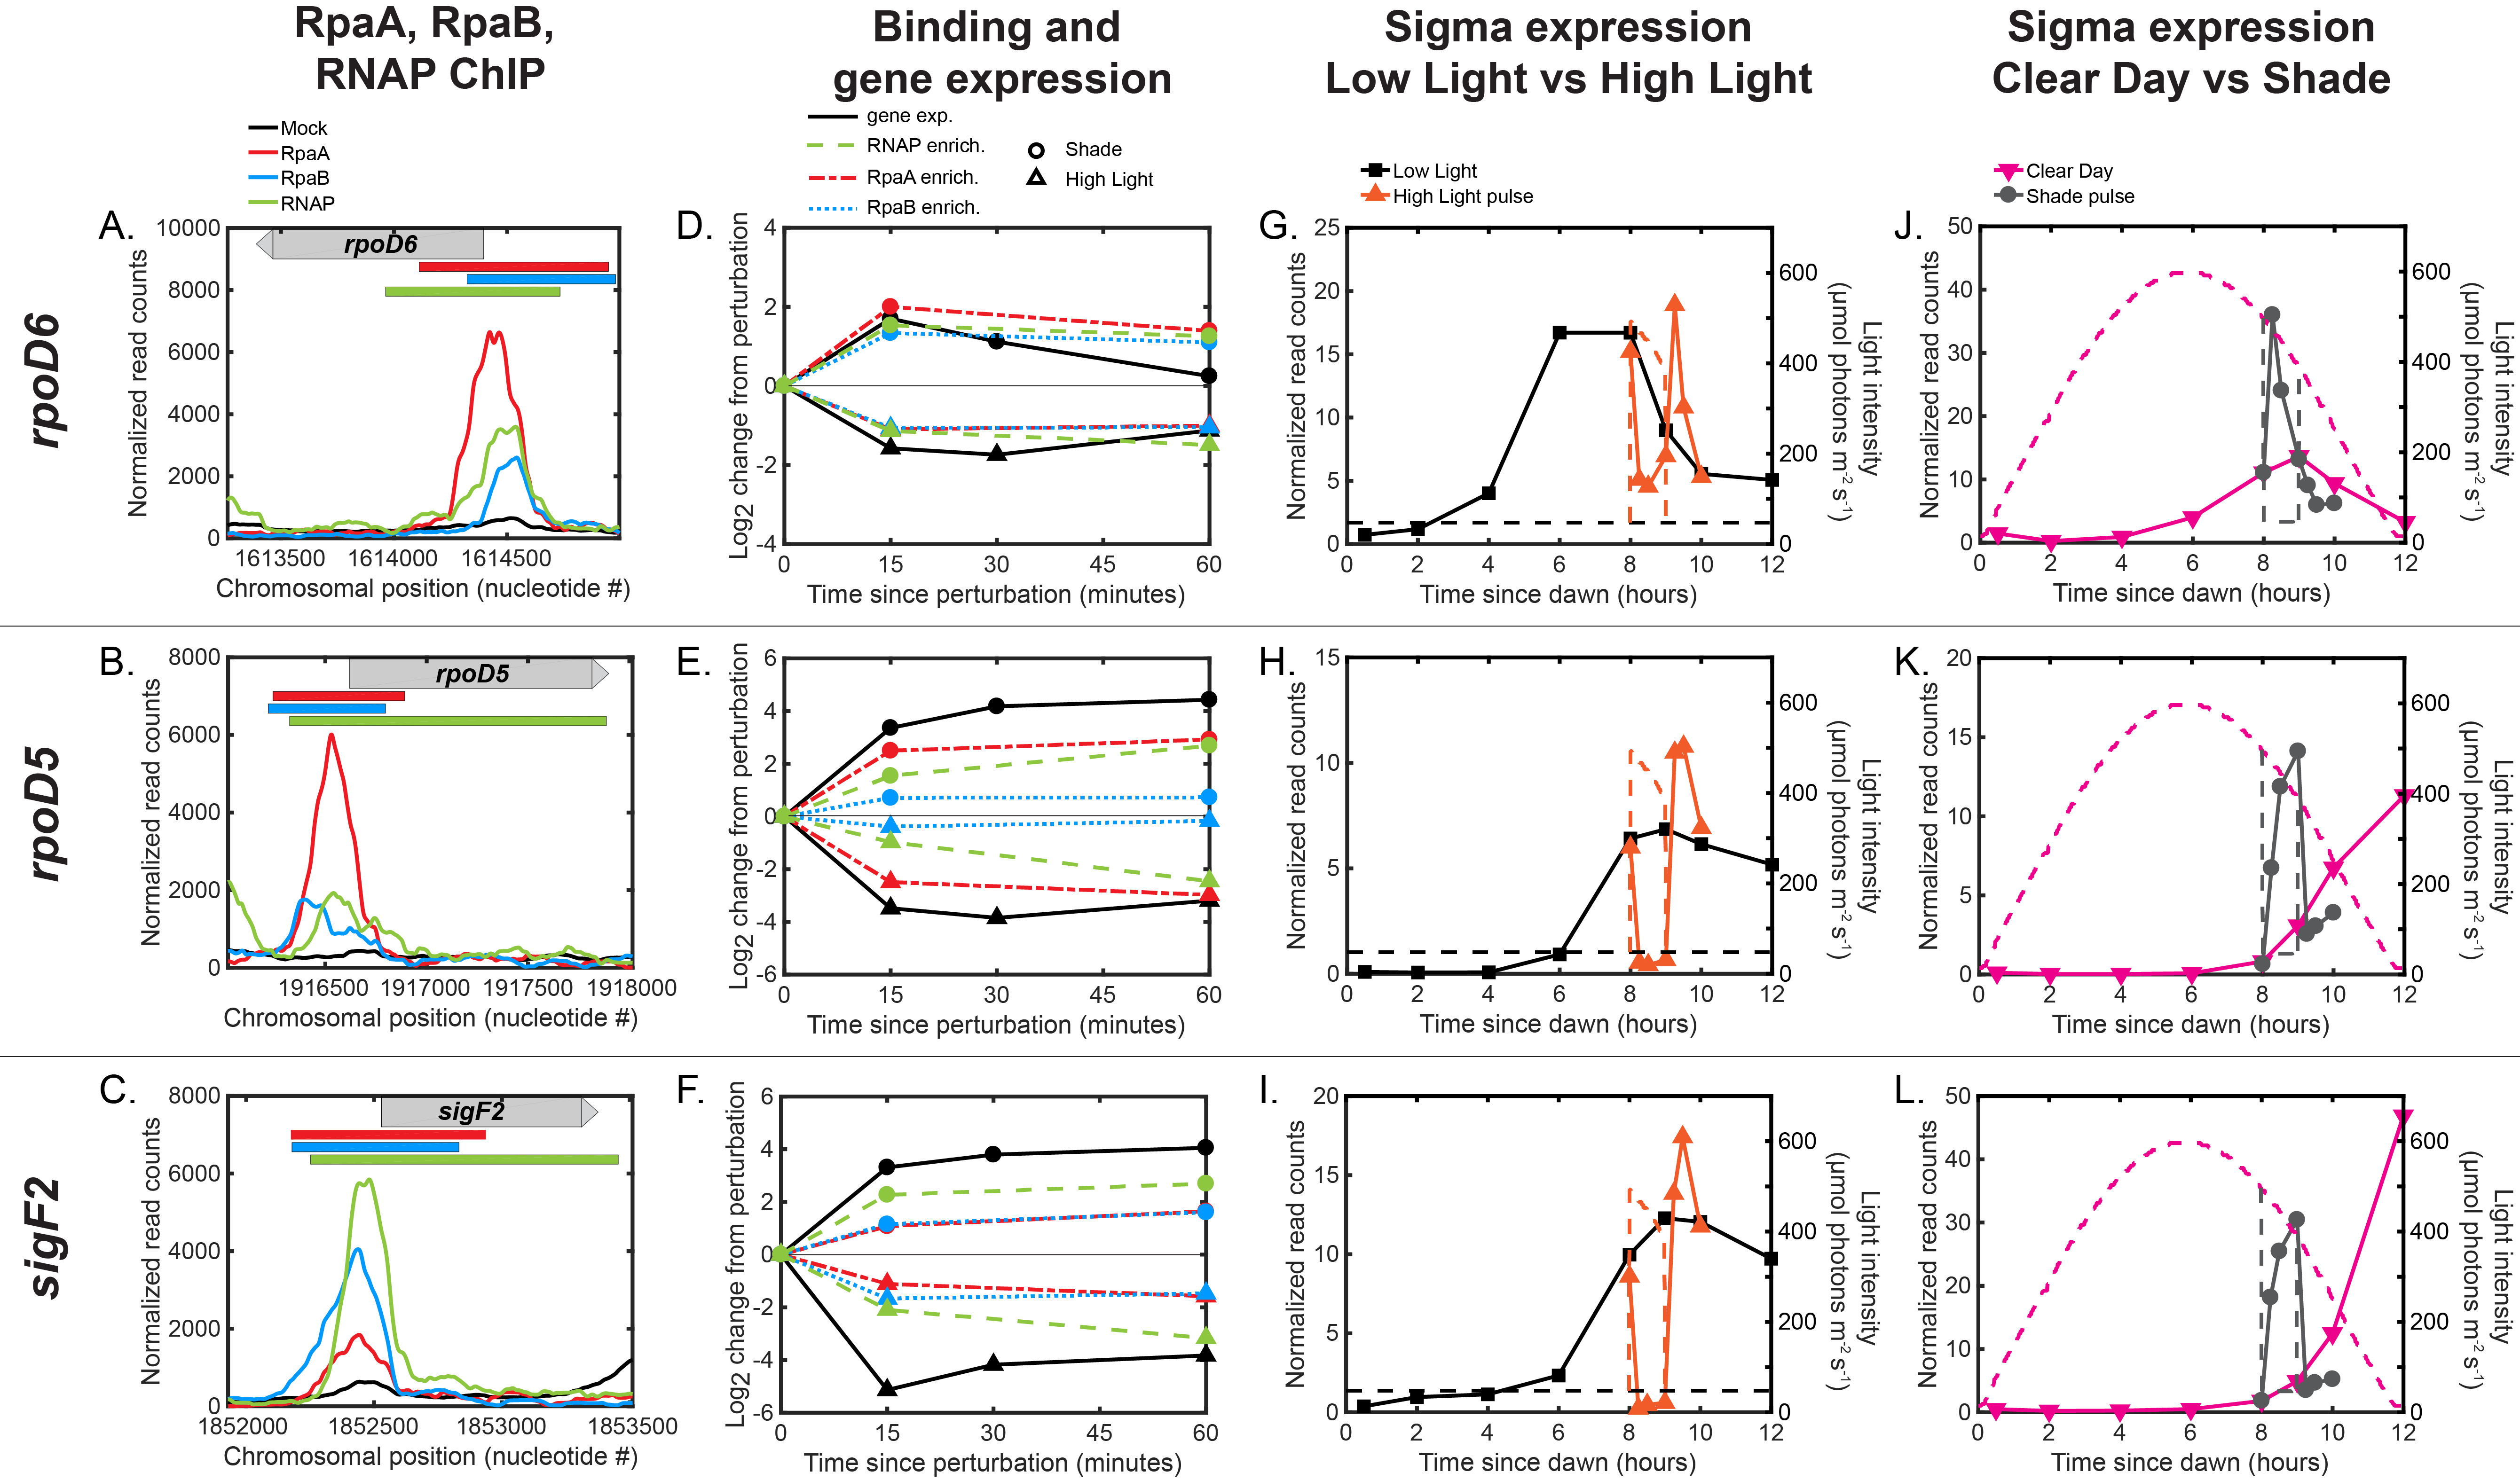

Supplement: supp [file elife-32032-supp-v2.zip › elife_poa_e32032_Figure_6_figure_supplement_1.png]

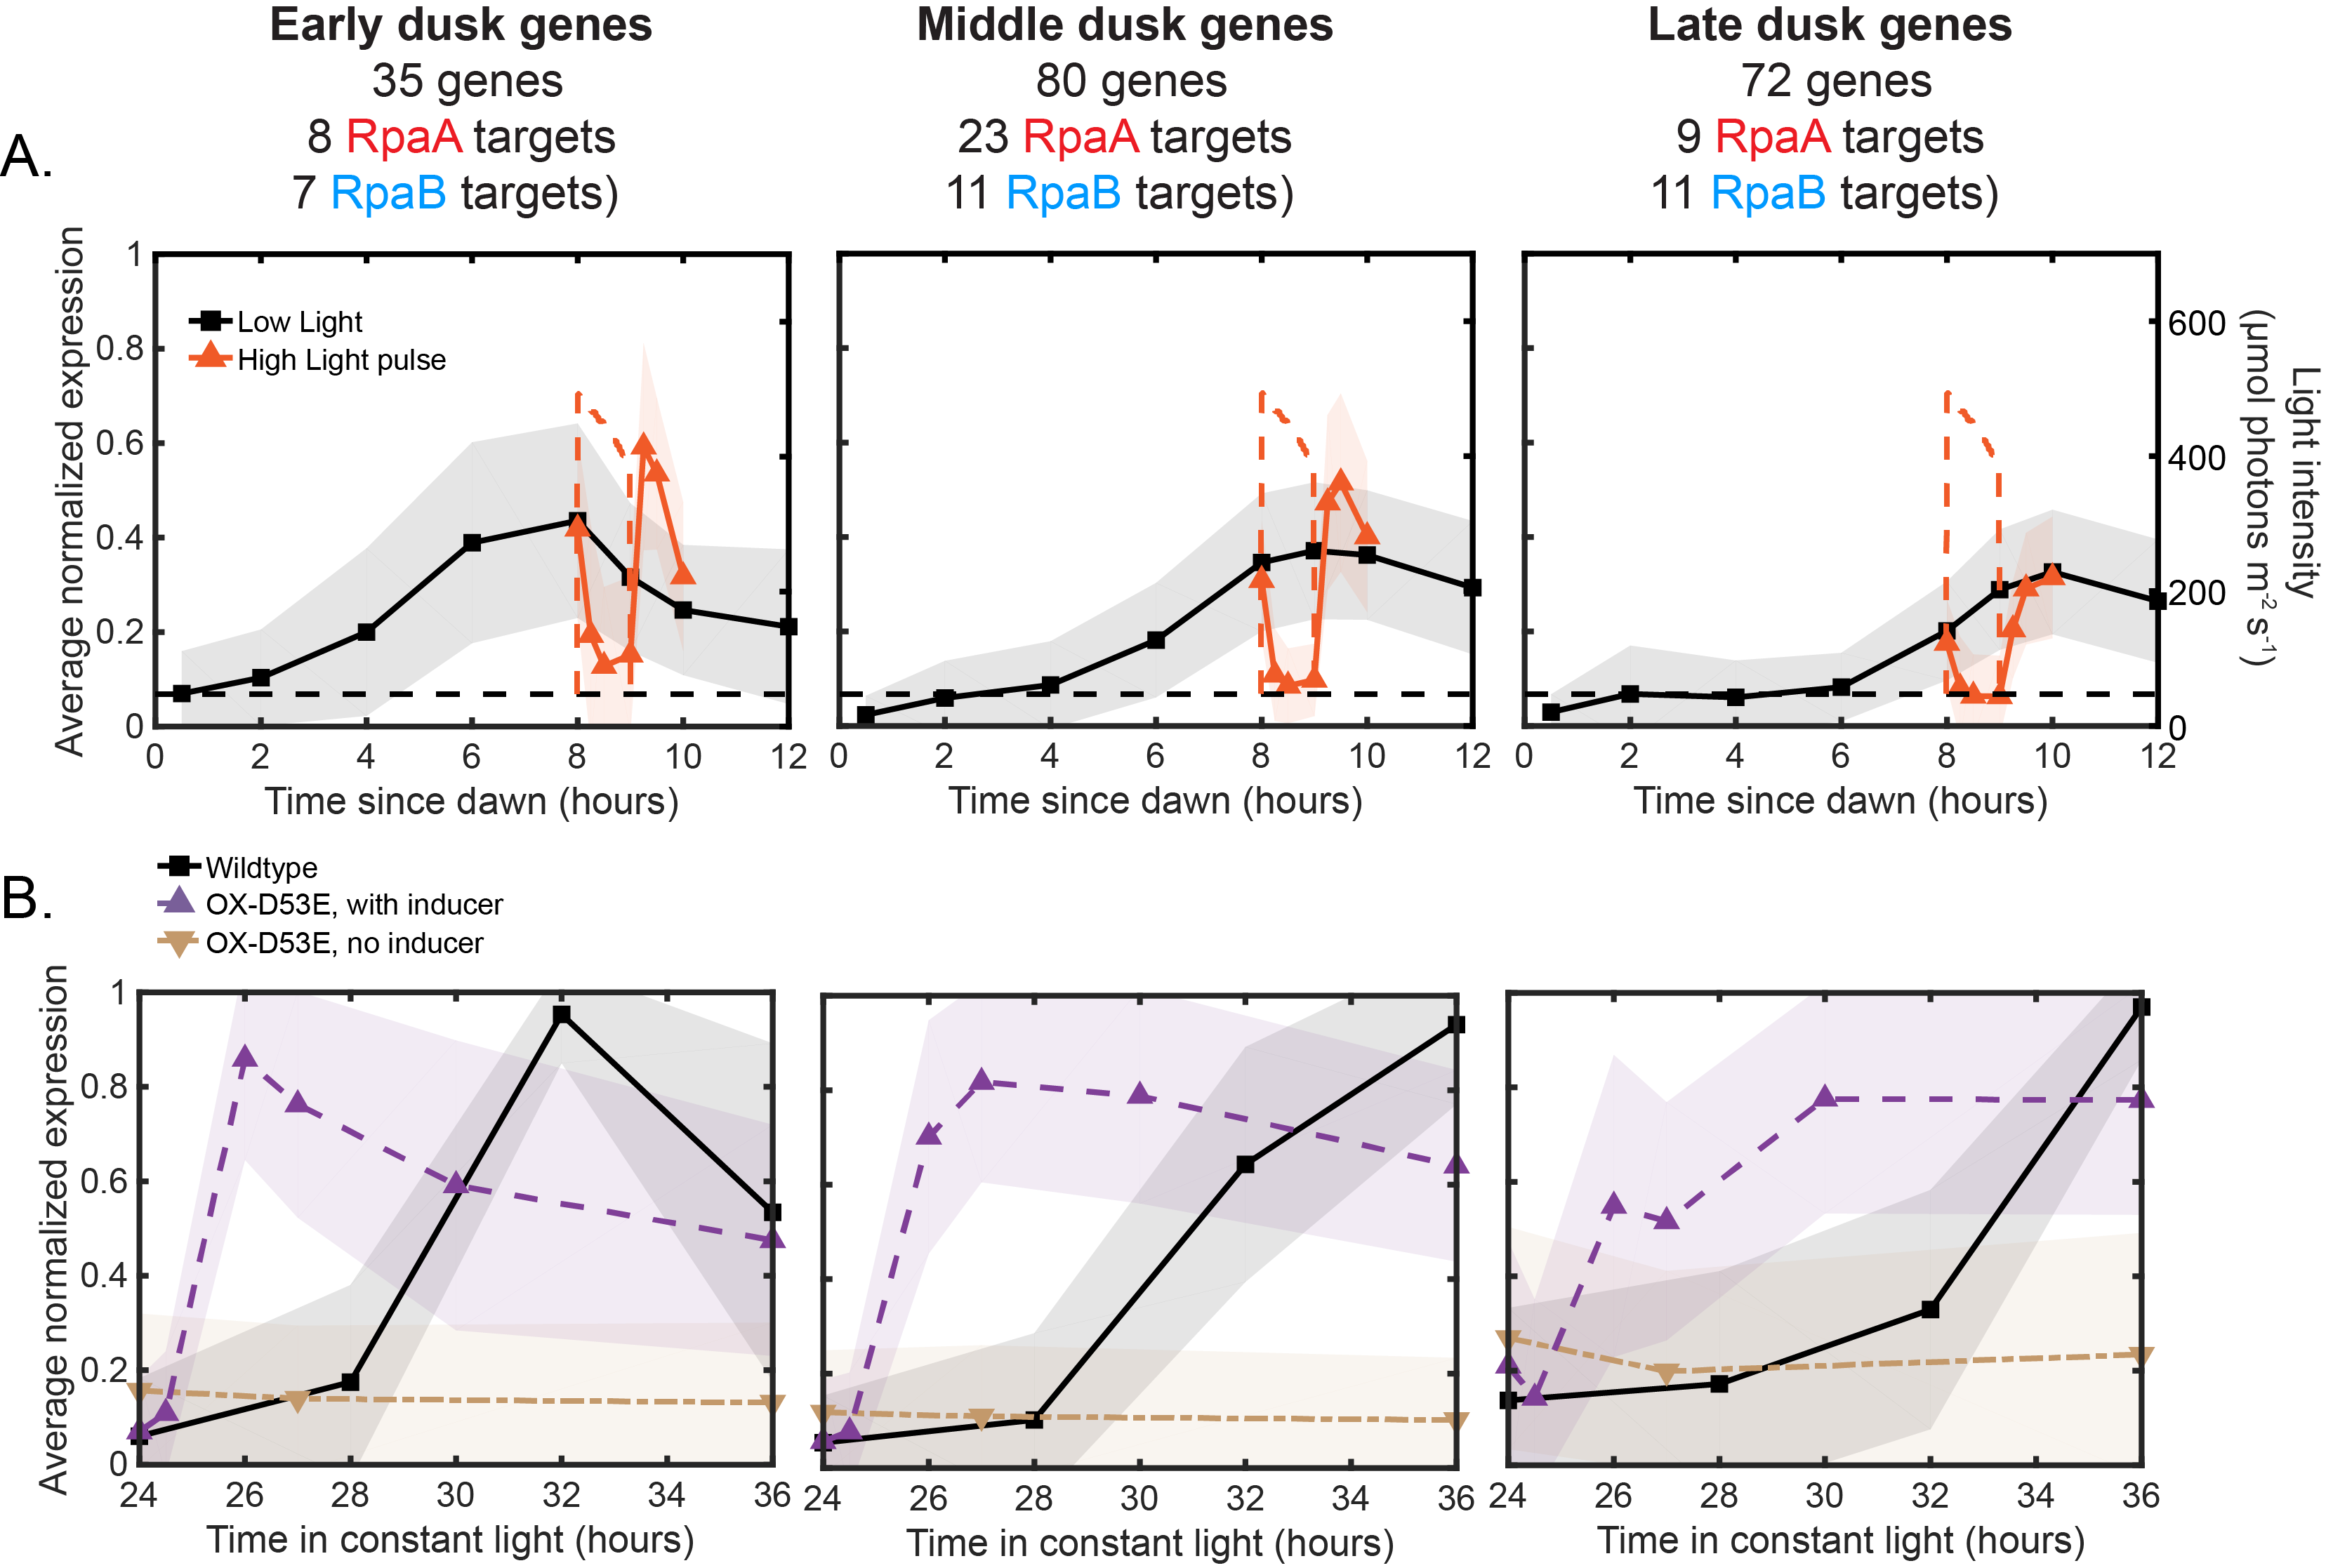

Supplement: supp [file elife-32032-supp-v2.zip › elife_poa_e32032_Figure_7_figure_supplement_1.png]
